# Supplementary material for: Type 2 Diabetes–Associated Genetic Variants Regulate Chromatin Accessibility in Human Islets
Source: Oxford University Press journal article supplement (doi:10.2337/db18-0393), 2018-09-04
Supplement: db180393supplementarytable2.xlsx [file db180393supplementarytable2.xlsx]

## Sheet: Sheet1
Table S1: Human islet donor demographic characteristics and islet metadata
Sample	UNOS_ID	ObtainedFrom	Pseudonymn	Condition	Sex	Race	Age	BMI	Medicine	HbA1c %	HbA1c (mmol/mol)	Genotyping Platform	Viability	Purity	T2D-ND comparison	Abbreviations
Islet2	ABE1388	Prodo Labs	ND1	Non-Diabetic	M	H	59	21.5	No	NR	NR	Omni2.5M	97	85	YES	ND = Non-diabetic
Islet4	ABGP063	Prodo Labs	ND2	Non-Diabetic	F	H	34	27.49	No	NR	NR	Omni5M	95	85	YES	T2D = type 2 diabetic
Islet5	ABGU379	Prodo Labs	ND3	Non-Diabetic	M	W	52	22.46	No	5.3	34	Omni5M	95	80	YES	W = white, AA = African American; H = Hispanic
Islet6	ABIQ498	Prodo Labs	ND4	Non-Diabetic	M	AA	23	21.5	No	NR	NR	Omni5M	95	95	NO	BMI = Body Mass Index
Islet7	ABIX182	Prodo Labs	ND5	Non-Diabetic	F	W	32	19	No	5.1	32	Omni5M	95	90-95	NO	HbA1c = glycated hemoglobin
Islet8	ABJV388	Prodo Labs	ND6	Non-Diabetic	M	W	66	20.3	No	5	31	Omni5M	95	90	NO	NR = Not Reported
Islet10	ABLC469	IIDP	ND7	Non-Diabetic	F	W	50	28.5	No	NR	NR	Omni5M	95	90	NO	IIDP = Integrated Islet Distribution Program
Islet13	ACCV204A	IIDP	ND8	Non-Diabetic	M	W	19	20	No	NR	NR	Omni5M	92	95	NO
Islet15	ACEK420A	IIDP	ND9	Non-Diabetic	F	W	53	22	No	5.4	36	Omni2.5M	95	95	NO
Islet16	ACEL337	Prodo Labs	ND10	Non-Diabetic	M	W	29	23	No	5.1	32	Omni2.5M	95	85	NO
Islet17	ACFQ363	IIDP	ND11	Non-Diabetic	M	W	38	25.3	No	NR	NR	Omni2.5M	90	93	YES
Islet18	ACHE099	Prodo Labs	ND12	Non-Diabetic	M	W	25	22.8	No	5.5	37	Omni2.5M	95	90	NO
Islet19	ACHY057	Prodo Labs	ND13	Non-Diabetic	M	AA	55	29.84	No	5.2	33	Omni2.5M	95	90	NO
Islet20	ACIB065	IIDP	ND14	Non-Diabetic	F	W	56	26.6	No	NR	NR	Omni2.5M	95	90	YES
Islet12	ACCR015A	IIDP	T2D1	Diabetic	M	H	51	35.8	Yes	5.3	34	Omni5M	97	80	YES
Islet21	ACIW009	Prodo Labs	T2D2	Diabetic	F	W	55	29.8	No	7.4	57	Omni2.5M	95	90	YES
Islet22	ACJV399	Prodo Labs	T2D3	Diabetic	F	H	42	43	No	6.5	48	Omni2.5M	95	95	YES
Islet23	ADAH342	Prodo Labs	T2D4	Diabetic	M	W	48	43.7	Yes	6.6	49	Omni2.5M	95	95	YES
Islet24	ADAR004	Prodo Labs	T2D5	Diabetic	M	H	51	24.4	No	6.9	52	Omni2.5M	95	90-95	YES
	Average_ND	Average_T2D	SD_ND	SD_T2D	pvalue (wilcoxon rank sum)
BMI	23.5921	35.34	3.38161	8.35392	0.008297
Age	42.2143	49.4	15.298	4.82701	0.6431
HbA1c (After removing missing data))	5.22857	6.54	0.179947	0.776531	0.01812
