# Supplementary material for: Type 2 Diabetes–Associated Genetic Variants Regulate Chromatin Accessibility in Human Islets
Source: Oxford University Press journal article supplement (doi:10.2337/db18-0393), 2018-09-04
Supplement: db180393supplementarytable3.xlsx [file db180393supplementarytable3.xlsx]

## Sheet: Sheet1
Table S2: ATAC-seq quality control metrics for the 19 islets
Sample	UNOS_ID	Pseudonymn	LibraryPrep	Date.Sequenced	Sequencing Depth	Total Mapped	ChrM	ChrX	ChrY	Peaks_All	Peaks_Filtered	ReadsInPeaks	FRiP
Islet2	ABE1388	ND1	1	AU	104175819	77189774	8743601	1760027	337988	32462	30358	15668458	0.202986
Islet4	ABGP063	ND2	1	AU	105576462	52235249	9824653	1852438	89622	38418	36044	16494564	0.315775
Islet5	ABGU379	ND3	1	AU	121318440	67334746	9089980	1508333	304179	36577	34183	15904769	0.236204
Islet6	ABIQ498	ND4	2	2013-02-14	75559724	41738276	6462896	877970	175345	44379	41411	12182227	0.291872
Islet7	ABIX182	ND5	2	2013-02-14	116017866	77073277	7113341	3408414	213578	40729	36715	12237527	0.158778
Islet8	ABJV388	ND6	3	2013-02-14	73061363	34192601	6908003	1145245	57257	47337	43841	10918867	0.319334
Islet10	ABLC469	ND7	3	2013-02-14	82342147	49352216	7373972	1897855	96671	44977	41422	11819302	0.239489
Islet13	ACCV204A	ND8	3	2013-05-14	107504838	84272145	6513505	1980281	349602	64103	60987	21215569	0.251751
Islet15	ACEK420A	ND9	2	2013-06-14	118815168	98962882	8081462	3812443	194601	73501	69646	26806528	0.270875
Islet16	ACEL337	ND10	2	2013-11-14	113351628	81082775	7909912	1844146	378402	48217	43062	21346503	0.263268
Islet17	ACFQ363	ND11	3	2013-06-14	127000328	80309766	9163644	1850381	328989	61616	58527	22460133	0.279669
Islet18	ACHE099	ND12	3	2013-09-14	125771226	43928488	6802755	1015081	159626	74651	69284	13179033	0.300011
Islet19	ACHY057	ND13	3	2013-09-14	121905912	38654444	6410345	862126	142272	74384	69657	13588809	0.351546
Islet20	ACIB065	ND14	4	2013-11-14	135857857	66967768	6893758	2779930	152576	50915	46863	12960603	0.193535
Islet12	ACCR015A	T2D1	3	2013-05-14	110252412	76397096	6858624	1884117	297251	77489	70940	20343787	0.26629
Islet21	ACIW009	T2D2	3	2013-11-14	96291242	57145088	6516755	2126566	124800	47268	44094	15135865	0.264867
Islet22	ACJV399	T2D3	3	2013-11-14	127276569	54300484	7460490	1785283	92923	62094	58480	18664743	0.343731
Islet23	ADAH342	T2D4	3	2013-02-15	117209568	39360841	9635934	815964	120849	57931	54956	17331911	0.440334
Islet24	ADAR004	T2D5	3	2013-02-15	111067324	68111351	7917722	1618334	286281	52422	49388	19710436	0.289385
													FRiP -> Fraction of Reads in Peaks
