# Supplementary material for: Type 2 Diabetes–Associated Genetic Variants Regulate Chromatin Accessibility in Human Islets
Source: Oxford University Press journal article supplement (doi:10.2337/db18-0393), 2018-09-04
Supplement: db180393supplementarytable4.xlsx [file db180393supplementarytable4.xlsx]

## Sheet: Sheet1
Table S3: Meta data and associated statistics of the 10 islets used for differential analyses
Sample	Condition	Sex	Race	Age	BMI	HbA1c	Abbreviations
ND1	Non-Diabetic	M	H	59	21.5	NR	W = white, AA = African American; H = Hispanic
ND2	Non-Diabetic	F	H	34	27.49	NR	NR = Not Reported
ND3	Non-Diabetic	M	W	52	22.46	5.3
ND11	Non-Diabetic	M	W	38	25.3	NR
ND14	Non-Diabetic	F	W	56	26.6	NR
T2D1	Diabetic	M	H	51	35.8	5.3
T2D2	Diabetic	F	W	55	29.8	7.4
T2D3	Diabetic	F	H	42	43	6.5
T2D4	Diabetic	M	W	48	43.7	6.6
T2D5	Diabetic	M	H	51	24.4	6.9
	Average_ND	Average_T2D	SD_ND	SD_T2D	pvalue (wilcoxon rank sum)
BMI	24.67	35.34	2.59842	8.35392	0.05556
Age	47.8	49.4	11.1445	4.82701	0.834
