# Supplementary material for: Type 2 Diabetes–Associated Genetic Variants Regulate Chromatin Accessibility in Human Islets
Source: Oxford University Press journal article supplement (doi:10.2337/db18-0393), 2018-09-04
Supplement: db180393supplementarytable5.xlsx [file db180393supplementarytable5.xlsx]

## Sheet: Sheet1
Table S4: RNA-seq quality control metrics for the 19 islets
Sample	UNOS_ID	Pseudonymn	SeqCenter	SeqFormat	ERCC_Spike-In	Sequencing Depth	Total_Mapped	Percentage_Mapped
Islet2	ABE1388	ND1	JAX	2 X 75 bps	Mix1	128825302	120361712	0.934302
Islet4	ABGP063	ND2	JAX	2 X 75 bps	Mix2	116604732	108480490	0.930327
Islet5	ABGU379	ND3	JAX	2 X 75 bps	Mix2	126712028	119407894	0.942356
Islet17	ACFQ363	ND11	JAX	2 X 75 bps	Mix2	105234258	96525072	0.91724
Islet20	ACIB065	ND14	JAX	2 X 75 bps	Mix1	108124646	99504928	0.92028
Islet12	ACCR015A	T2D1	JAX	2 X 75 bps	Mix1	121218218	111268028	0.917915
Islet21	ACIW009	T2D2	JAX	2 X 75 bps	Mix2	122274050	113615866	0.92919
Islet22	ACJV399	T2D3	JAX	2 X 75 bps	Mix1	138528846	128393082	0.926833
Islet23	ADAH342	T2D4	JAX	2 X 75 bps	Mix1	110805246	102864496	0.928336
Islet24	ADAR004	T2D5	JAX	2 X 75 bps	Mix2	123176964	113216658	0.919138
Islet10	ABLC469	ND7	NYGC	2 X 125 bps	Mix1	70463988	61501064	0.872801
Islet13	ACCV204A	ND8	NYGC	2 X 125 bps	Mix1	74337180	64995640	0.874336
Islet15	ACEK420A	ND9	NYGC	2 X 125 bps	Mix1	74454480	67921616	0.912257
Islet16	ACEL337	ND10	NYGC	2 X 125 bps	Mix2	69735600	64609084	0.926486
Islet18	ACHE099	ND12	NYGC	2 X 125 bps	Mix2	39719840	35377892	0.890686
Islet19	ACHY057	ND13	NYGC	2 X 125 bps	Mix1	70801752	62248860	0.879199
Islet6	ABIQ498	ND4	NYGC	2 X 125 bps	Mix2	69130504	61057064	0.883215
Islet7	ABIX182	ND5	NYGC	2 X 125 bps	Mix1	68137884	59818092	0.877898
Islet8	ABJV388	ND6	NYGC	2 X 125 bps	Mix1	74154552	66412124	0.895591
