# Supplementary material for: Type 2 Diabetes–Associated Genetic Variants Regulate Chromatin Accessibility in Human Islets
Source: Oxford University Press journal article supplement (doi:10.2337/db18-0393), 2018-09-04
Supplement: db180393supplementarytable6.xlsx [file db180393supplementarytable6.xlsx]

## Sheet: Sheet1
Table S5: Constructs for luciferase assay
AssociatedGene	pvalue (Mann-Whitney)	caQTL_Feature_Coordinates	caQTL_SNPs	pos (hg19)	R^2	Ref	Alt	Higher_Accessibility	Higher_Luc_Activity	PrimerSequence_FWD	PrimerSequence_REV	PrimerCoordinates_FWD	PrimerCoordinates_REV	RegionAmplified
CELF4	0.297326	chr18:34970466-34970815	rs488797 (lead)	34970627	1	C	T	T	NS	ggggacaagtttgtacaaaaaagcaggctGGGTAGCTCTTTCAGGGCAG	ggggaccactttgtacaagaaagcgtTCCCTACGTCTCCTGTCTGG	chr18:34970397-34970416	chr18:34971045-34971064	chr18:34970397-34971064
CCDC67	0.000164541	chr11:93012711-93013611	rs7943372 (lead)	93013387	1	T	G	G	G	ggggacaagtttgtacaaaaaagcaggctTCCTCCCTCCTCCCATAAGC	ggggaccactttgtacaagaaagcgtTCTGGCTTCTAGTACAGCGT	chr11:93012675-93012694	chr11:93013638-93013657	chr11:93012675-93013657
IL20RA	4.11353e-05	chr6:137290476-137291460	rs6937795 (lead)	137291281	1	A	C	A	A	ggggacaagtttgtacaaaaaagcaggctATGGTTGCCCATCAGGTTGTA	ggggaccactttgtacaagaaagcgtGTGTGACACTTGGGAAGCATAA	chr6:137290566-137290586	chr6:137291400-137291421	chr6:137290566--137291421
INS	0.545701	chr11:2196866-2197373	rs4929965 (lead)	2197286	1	A	G	A	NS	ggggacaagtttgtacaaaaaagcaggctACAAAACAGGTGACCAGGGG	ggggaccactttgtacaagaaagcgtTGTGTCCGTGGGTCATTACG	chr11:2196818-2196837	chr11:2197771-2197790	chr11:2196818--2197790
GLIS3	4.11353e-05	chr9:3880918-3881165	rs10973998 (lead)	3881005	1	C	G	C	C	ggggacaagtttgtacaaaaaagcaggctATGACCTAGCCCCCAAAAGC	ggggaccactttgtacaagaaagcgtACCAAGCTCCATGCTGACAA	chr9:3880736-3880755	chr9:3881185-3881204	chr9:3880736-3881204
ELOVL4	0.000781571	chr6:80582055-80582451	rs346316 (lead)	80582366	1	C	T	C	C	ggggacaagtttgtacaaaaaagcaggctGGGTAAGAACCTCAGACCGT	ggggaccactttgtacaagaaagcgtCCTGCCCAACCAGTGAAGAT	chr6:80581839-80581858	chr6:80582760-80582779	chr6:80581839-80582779
			rs346315	80582193	1	C	T
TSPAN8	0.666475	chr12:71588264-71588937	rs1463768 (lead)	71588592	1	T	G	G	NS	ggggacaagtttgtacaaaaaagcaggctAGAGCCCCTACCTGAAATCTGTA	ggggaccactttgtacaagaaagcgtTCAAGCAATATAACCCGAGCAG	chr12:71588175-71588197	chr12:71589148-71589169)	chr12:71589169-71588175
			rs1463769	71588586	0.99	T	G
CDKN2B	0.489428	chr9:22133728-22134241	rs10811661 (lead)	22134094	1	T	C	T	NS	ggggacaagtttgtacaaaaaagcaggctCTTTGGAACAGGGGCATGGATT	ggggaccactttgtacaagaaagcgtAGGGGCAGGATTCTGAATTTATGG	chr9:22133629-22133650	chr9:22134603-22134626	chr9:22133629-22134626
			rs10811660	22134068	1	G	A
NPY (NO)	4.11353e-05	chr7:24406223-24406898	rs17149360 (lead)	24406877	1	T	C	T	T	ggggacaagtttgtacaaaaaagcaggctACACTTCAGTGGGCATGTTCAA	ggggaccactttgtacaagaaagcgtTCGGGTTTTCCCCCGAATC	chr7:24406182-24406203	chr7:24407070-24407089	chr7:24406182-24407089
			rs13230631	24406847	1	T	G
			rs17149356	24406760	0.81	T	C
			rs1107376	24406519	0.84	A	C
PLEKHA1	0.0001645	10:124167102-124167694	rs2421016	124167512	1	C	T	C	C	ggggacaagtttgtacaaaaaagcaggctGGAGCCCGAACTCTGAAGTG	ggggaccactttgtacaagaaagcgtAGCCTGAGACCATTCACTACT	chr10:124167010-124167029	chr10:124167769-124167789	chr10:124167010-124167789
ZMIZ1	4.114e-05	10:80943867-80944342	rs703977 (lead)	80944230	1	T	G	T	T	ggggacaagtttgtacaaaaaagcaggctGACCCTCAGGAAACGTCGG	ggggaccactttgtacaagaaagcgtAGGCAGTAAAGACTCGGGGA	chr10:80943782-80943801	chr10:80944607-80944626	chr10:80943782-80944626
			rs703978	80944147	0.62	C	G
EVADR	4.114e-05	6:71108090-71109357	rs16869158 (lead)	71109165	1	A	T	A	A	ggggacaagtttgtacaaaaaagcaggctTTGTGGAGGTGTTTAACTAGTTTTT	ggggaccactttgtacaagaaagcgtAACTGGAGAGAGGGGTGTCA	chr6:71108457-71108481	chr6:71109380-71109399	chr6:71108457-71109399
			rs16869156	71109059	0.95	C	T
			rs79492893	71109113	0.94	C	T
ROR2	0.01061	9:94395900-94396181	rs7855529 (lead)	94396059	1	T	C	T	NS	ggggacaagtttgtacaaaaaagcaggctAAGAAGCTTCCAGGTTTCCTGA	ggggaccactttgtacaagaaagcgtTGGAAGTGAGTGATTTACAGGGA	chr9:94395860-94395881	chr9:94396199-94396221	chr9:94395860-94396221
			rs7855529	94396138	1	T	C
