# Supplementary material for: Type 2 Diabetes–Associated Genetic Variants Regulate Chromatin Accessibility in Human Islets
Source: Oxford University Press journal article supplement (doi:10.2337/db18-0393), 2018-09-04
Supplement: db180393supplementarytable7.xlsx [file db180393supplementarytable7.xlsx]

## Sheet: Table S6-Islet_Consensus_Peaks_
Table S6: 154,437 OCRs in 19 Islets
seqnames	start	end	width	Islet2	Islet4	Islet5	Islet6	Islet7	Islet8	Islet10	Islet13	Islet15	Islet16	Islet17	Islet18	Islet19	Islet20	Islet12	Islet21	Islet22	Islet23	Islet24
chr4	166705682	166706112	431	11	23	16	6	29	8	15	32	20	19	34	21	15	24	109	56	57	37	91
chr1	144339866	144340396	531	1	1	1	1	1	1	1	1	1	2	1	1	1	1	1	1	1	23	73
chr11	6608769	6609126	358	32	24	17	12	28	21	15	26	34	56	40	21	25	30	144	89	75	34	82
chr2	95536821	95537649	829	86	62	58	53	78	53	44	96	139	86	116	56	45	86	262	134	170	90	179
chr1	68174220	68174640	421	90	59	41	36	33	42	42	57	107	62	102	46	69	58	301	129	103	75	373
chr1	149576956	149577542	587	2	1	1	4	6	2	6	14	14	11	12	1	2	4	16	15	139	12	10
chr8	9854960	9855397	438	28	10	25	9	17	20	16	23	25	20	30	21	28	18	115	50	48	25	96
chr11	18690138	18690380	243	21	7	25	34	30	12	12	29	32	25	26	25	11	42	87	35	135	91	62
chr1	164655618	164655787	170	5	10	4	5	8	6	7	8	13	2	8	2	12	8	42	25	18	15	26
chr2	198138204	198138650	447	35	20	33	20	22	34	27	48	69	48	91	36	51	63	193	81	90	64	133
chr5	10649492	10650820	1329	161	69	81	67	95	123	64	224	191	96	180	59	153	147	362	276	330	192	365
chr4	34272997	34273595	599	41	46	60	48	51	18	46	72	137	46	49	39	26	64	38	21	16	9	21
chr5	157980614	157981399	786	32	37	44	26	34	10	27	39	33	39	69	59	46	45	203	78	64	61	199
chr1	225805215	225805598	384	30	27	28	35	44	22	16	138	86	23	31	24	18	27	11	5	13	6	17
chr11	82422334	82422887	554	28	6	27	15	21	22	18	35	25	30	41	22	24	21	123	66	25	38	116
chr1	149575943	149576308	366	1	1	1	1	1	1	1	1	1	1	1	1	1	1	1	1	60	1	1
chr2	85536068	85536687	620	75	61	71	37	38	32	29	125	94	87	136	46	70	52	259	78	182	76	232
chr5	10679538	10680034	497	33	14	20	20	20	19	11	30	29	44	69	27	24	29	106	67	52	42	85
chr1	229125656	229126102	447	20	8	13	5	25	11	13	16	28	19	59	27	23	34	87	44	70	40	80
chr1	108023256	108023955	700	67	69	44	38	50	24	26	69	70	65	125	53	76	60	238	95	110	118	145
chr11	97622469	97622612	144	9	3	7	10	10	6	8	21	24	8	15	5	8	14	42	34	35	8	34
chr8	20215834	20216011	178	15	8	12	3	16	6	3	9	13	24	23	5	25	9	74	27	38	30	36
chr2	86450313	86450778	466	35	18	20	26	27	9	11	40	35	33	43	34	18	17	98	45	47	46	77
chr5	54712237	54712494	258	8	10	13	14	19	11	15	68	50	11	21	8	13	10	9	2	5	4	1
chr3	8664544	8665544	1001	152	83	79	63	95	83	59	156	239	104	225	90	169	119	479	154	275	189	297
chr14	58215018	58215397	380	34	34	29	44	38	20	21	119	67	29	52	22	33	37	17	12	13	13	23
chr1	233689797	233690260	464	60	65	87	40	76	19	31	220	176	44	69	55	46	68	43	15	16	22	33
chr11	111569528	111569861	334	42	43	49	78	63	30	31	174	94	40	50	24	32	64	23	18	20	10	27
chr11	78830577	78831116	540	41	25	24	15	15	20	20	41	27	37	69	22	60	51	172	92	63	51	115
chr11	92330265	92330452	188	21	26	21	25	29	7	13	49	61	30	38	23	15	27	8	5	16	9	12
chr10	5090543	5090873	331	12	4	26	11	9	9	3	14	58	13	15	5	10	16	2	1	2	1	7
chr7	24620095	24620491	397	43	57	57	66	70	46	70	131	155	59	97	48	59	60	45	28	38	32	34
chr9	33750342	33751115	774	59	54	46	50	47	37	37	111	87	79	84	44	57	54	199	66	157	85	120
chr4	54568561	54569533	973	250	170	152	114	156	127	176	282	224	189	434	202	243	235	794	371	357	285	526
chr18	72462308	72462617	310	29	29	29	27	59	20	33	128	35	24	31	38	22	36	19	12	16	5	11
chr3	38035391	38036035	645	91	89	47	62	69	48	50	127	130	154	152	83	80	85	288	141	155	127	204
chr3	75667637	75669310	1674	317	325	328	283	230	233	190	493	552	505	742	282	489	341	1011	583	660	541	971
chr5	30919673	30919849	177	14	19	20	8	23	17	16	48	35	13	42	27	14	18	14	5	8	7	7
chr6	73972498	73973429	932	178	136	129	123	147	113	132	232	446	217	386	164	248	161	520	280	374	300	448
chr6	76843141	76843848	708	65	23	40	26	29	26	29	34	76	20	87	18	41	81	191	77	60	86	229
chr6	124623245	124623452	208	14	17	11	10	13	9	11	25	78	20	16	17	6	9	5	3	5	2	8
chr3	21545392	21545821	430	30	34	50	53	68	38	26	95	43	42	45	48	24	66	14	16	13	15	29
chr4	75480737	75480917	181	1	1	1	1	1	1	1	1	1	1	1	1	1	1	1	1	46	1	1
chr8	7877461	7877857	397	79	48	34	2	1	6	18	40	116	44	53	1	2	18	6	1	1	1	2
chr10	58775358	58776397	1040	143	70	108	61	124	67	69	81	74	77	235	144	223	183	742	407	261	165	393
chr1	235636971	235637491	521	36	34	39	25	48	16	15	162	170	43	37	30	38	29	18	14	18	8	17
chr5	98175018	98175912	895	93	93	57	53	57	65	53	149	116	92	160	85	48	93	239	131	147	139	213
chr11	114010458	114010757	300	23	15	17	8	16	5	8	24	16	13	21	11	14	20	76	31	31	19	39
chr10	62066893	62067125	233	8	12	11	5	16	9	5	10	55	5	13	9	2	10	3	2	1	1	4
chr14	57979047	57979274	228	23	15	17	19	18	16	21	49	41	29	56	32	24	42	17	8	15	9	12
chr16	32330765	32330958	194	6	28	15	11	14	2	10	14	17	13	13	3	4	12	1	2	1	4	3
chr1	245851138	245851881	744	58	34	24	23	39	15	22	45	50	49	43	16	19	32	91	64	87	70	62
chr7	127814584	127814720	137	15	12	8	6	8	2	12	10	9	15	11	13	16	11	58	28	25	14	36
chr2	7663996	7664185	190	12	19	10	6	26	6	9	21	33	13	23	13	6	14	10	3	3	3	5
chr4	176213612	176214257	646	77	78	61	76	109	30	86	146	193	56	64	61	34	78	35	32	33	27	40
chr2	225897343	225897824	482	62	38	52	65	119	29	55	158	58	107	93	83	20	94	48	18	23	17	33
chr3	163828137	163828437	301	5	8	17	8	10	10	25	15	8	17	28	27	6	16	6	3	2	3	3
chr9	36250194	36250359	166	22	15	13	27	37	9	12	63	29	21	26	14	10	20	6	7	8	8	6
chr9	76815948	76816425	478	38	49	34	38	44	19	31	87	34	27	42	80	10	55	23	9	18	7	13
chr11	29662599	29663061	463	38	41	49	25	37	16	23	52	114	36	40	24	26	27	16	25	13	6	17
chr1	174943794	174944315	522	63	45	24	34	54	42	30	47	51	33	98	91	80	92	332	127	128	72	249
chr15	67870427	67870600	174	26	15	28	10	25	6	9	56	37	15	21	17	6	21	10	3	5	5	10
chr5	115711627	115711937	311	35	8	35	11	21	12	36	41	27	29	56	36	35	37	150	51	117	30	99
chr11	45183239	45183823	585	52	13	35	10	57	19	26	57	43	46	45	22	33	40	141	70	70	41	149
chr3	108907532	108908196	665	72	49	41	47	67	36	52	80	62	90	166	106	138	80	413	177	140	137	202
chr10	45192330	45192524	195	1	6	10	7	48	20	4	17	17	21	30	30	39	30	17	196	173	37	102
chr20	10110511	10110645	135	8	6	8	1	5	6	6	12	7	13	5	9	4	6	46	7	30	7	30
chr10	124264036	124264441	406	69	22	32	22	40	10	29	56	86	60	87	43	74	44	118	87	152	112	92
chr1	240578866	240579240	375	31	26	29	24	49	33	19	59	43	17	61	24	25	38	10	10	20	15	9
chr1	167105450	167105731	282	27	6	9	4	16	8	7	13	28	17	21	14	11	21	54	28	27	30	44
chr7	143317269	143318366	1098	113	149	89	62	68	35	18	2	329	1	1	33	153	4	6	3	4	2	1
chr2	182321547	182322948	1402	151	127	100	67	98	63	63	187	212	219	240	88	156	103	310	242	207	197	348
chr6	159511932	159512324	393	19	15	9	10	14	6	14	29	15	20	22	12	15	17	74	31	29	20	38
chr12	100690011	100690319	309	31	32	27	45	36	10	24	123	60	26	29	44	28	39	12	9	20	9	18
chr6	170578548	170579003	456	37	31	40	38	46	34	23	88	72	50	66	68	82	64	231	94	108	106	89
chr1	172557545	172558157	613	66	27	48	38	58	37	35	112	147	45	78	47	41	55	38	27	18	28	33
chr6	11362835	11363170	336	25	37	33	32	35	14	24	149	85	44	53	41	13	52	18	10	21	14	15
chr5	142936714	142937315	602	46	56	70	47	75	62	62	165	112	77	80	97	37	66	57	22	48	16	37
chr4	81599462	81599692	231	13	15	12	13	18	4	16	22	21	13	31	8	5	8	6	8	5	1	1
chr11	93583008	93583933	926	110	88	75	84	87	68	68	180	223	137	239	83	116	83	353	187	156	173	206
chr11	19366375	19368242	1868	142	168	129	127	162	106	136	272	294	240	271	149	183	160	390	274	302	230	337
chr14	57954269	57954763	495	33	31	59	22	30	28	26	117	45	39	72	26	35	42	18	19	22	16	14
chr5	115890526	115890876	351	24	16	30	17	21	12	15	26	39	30	64	28	53	31	144	76	35	45	86
chr14	105347791	105348184	394	24	28	35	17	18	25	17	50	32	32	47	48	44	31	109	46	99	43	104
chr7	124893549	124894166	618	66	74	87	106	132	83	161	142	44	85	153	160	49	224	49	35	38	19	50
chr20	42169970	42170373	404	43	29	22	47	42	24	22	121	51	23	25	38	39	23	20	11	16	8	17
chr1	245534396	245534947	552	43	26	15	13	35	10	17	28	67	28	39	20	6	25	124	45	60	29	92
chr14	92116440	92116663	224	6	6	10	7	14	8	18	31	42	21	13	25	4	8	8	2	1	4	4
chr2	42647909	42648568	660	72	58	61	44	77	30	47	195	142	71	89	58	29	50	54	36	32	17	32
chr4	31147794	31148600	807	143	162	202	182	193	145	219	383	293	201	304	230	131	257	160	87	109	108	151
chr12	13196950	13197931	982	170	149	154	106	124	136	108	272	421	220	392	136	187	157	483	303	294	255	383
chr9	73516677	73516934	258	57	45	75	36	71	19	23	145	43	55	64	30	22	74	18	22	22	11	25
chr5	110559339	110560461	1123	334	326	243	189	220	248	178	552	497	438	585	223	345	224	780	538	491	439	859
chr4	9692736	9693794	1059	540	533	545	375	305	387	355	727	1092	1023	833	382	869	346	1805	898	1202	1131	1254
chr1	114895405	114896193	789	67	56	68	37	84	34	20	68	102	73	75	71	97	53	245	90	151	107	164
chr4	77670560	77670741	182	19	8	18	10	10	2	8	22	9	9	12	11	8	16	58	28	23	18	33
chr11	115906732	115907235	504	21	15	22	6	43	28	20	25	20	46	35	34	32	40	135	44	79	51	113
chr2	163480505	163480782	278	36	34	46	24	32	15	31	91	63	24	22	37	19	45	16	10	21	4	21
chr9	46391134	46391386	253	4	1	1	1	1	1	1	1	1	1	1	1	1	1	1	1	1	1	55
chr6	81984287	81984495	209	15	29	26	13	29	11	16	52	70	23	29	16	13	24	16	3	8	8	16
chr15	68131912	68133112	1201	240	238	248	295	206	142	151	490	456	638	403	394	388	325	326	1714	1380	243	949
chr2	37227496	37227814	319	19	11	18	11	17	7	14	66	89	21	27	16	10	13	11	4	4	1	14
chr14	94254639	94255589	951	71	40	52	45	94	34	39	125	70	108	131	67	47	36	155	182	117	100	180
chr7	82136985	82137932	948	227	214	177	186	160	174	125	321	335	284	474	248	295	262	668	294	531	449	502
chr22	42619395	42619556	162	11	12	1	6	18	8	7	31	25	8	10	7	2	13	6	1	3	1	2
chr2	200800652	200801030	379	36	24	36	23	25	14	16	105	109	17	29	14	7	23	12	10	6	7	13
chr1	224690623	224691641	1019	187	141	156	122	131	119	68	243	370	253	338	141	187	129	408	326	445	229	307
chr13	87695306	87695523	218	22	35	43	30	15	24	32	43	64	30	21	38	20	28	17	13	15	2	17
chr2	73005482	73006071	590	29	20	55	29	32	23	30	123	127	42	81	36	36	36	25	27	14	14	22
chr10	50841651	50842491	841	61	38	63	28	51	36	40	78	55	52	124	45	53	74	204	131	90	58	149
chr7	123072788	123072902	115	15	19	17	8	16	4	8	19	35	8	9	12	16	9	8	4	1	4	5
chr4	95375548	95375762	215	90	109	100	101	108	77	72	262	232	122	167	69	94	97	99	57	57	60	81
chr1	163625681	163626354	674	62	42	46	26	53	45	22	54	48	53	63	69	124	60	154	122	133	128	223
chr10	16426060	16426600	541	50	51	46	40	44	66	26	117	60	61	90	79	83	137	243	108	235	103	221
chr2	31619876	31620463	588	48	27	44	23	29	21	26	47	59	73	95	72	64	52	211	87	108	46	165
chr13	49150786	49151096	311	23	30	28	28	28	8	12	54	36	19	17	29	15	11	11	13	4	8	1
chr6	125222385	125222529	145	13	11	10	1	10	6	11	22	24	10	8	15	6	15	3	1	2	1	9
chr2	125271370	125271694	325	16	8	16	6	25	15	15	24	17	16	32	17	30	25	102	28	36	46	46
chr2	83282504	83282990	487	49	49	58	59	75	40	78	108	144	37	60	54	40	87	41	24	30	23	41
chr3	187431367	187431535	169	19	13	6	7	7	3	14	20	21	16	23	19	9	31	52	34	34	25	46
chr11	35547074	35547907	834	67	59	37	46	46	48	40	86	88	81	87	53	72	57	191	98	110	76	137
chr18	28293246	28293700	455	34	67	47	38	62	27	42	59	77	52	86	52	53	55	37	32	19	19	33
chr2	77780028	77780284	257	13	6	9	4	14	5	7	4	15	16	10	14	14	16	58	23	20	32	22
chr10	105409858	105410057	200	16	3	14	12	10	4	7	18	8	19	13	7	15	4	70	18	39	19	20
chr1	143499127	143499267	141	14	6	24	5	17	1	20	16	19	14	16	6	8	16	3	3	5	4	2
chr11	27648107	27648455	349	21	13	10	2	24	4	14	14	26	18	26	14	27	27	79	35	38	35	46
chr8	117039551	117039717	167	9	13	14	12	11	10	10	12	42	11	13	8	6	8	3	2	2	5	7
chr11	97255852	97256246	395	38	10	20	16	30	10	12	32	18	28	52	29	36	20	93	28	77	71	58
chr8	95048221	95048433	213	29	30	38	32	25	12	12	59	68	24	24	27	24	48	22	16	10	2	16
chr7	2264729	2265256	528	29	15	35	10	15	18	7	20	115	13	19	8	10	15	6	7	7	1	6
chr8	79356775	79357818	1044	47	31	33	15	27	18	20	24	64	28	72	28	37	29	110	75	59	39	92
chr5	110714414	110714628	215	12	9	8	4	11	11	9	13	10	25	5	4	4	8	4	2	1	1	4
chr3	123065440	123066022	583	40	32	36	25	65	24	41	64	39	65	58	40	66	59	220	56	86	177	77
chr4	1513329	1513759	431	18	9	9	18	26	15	16	14	28	18	12	6	7	8	16	178	84	3	38
chr1	202038825	202039045	221	16	8	4	6	9	10	2	16	14	14	17	7	12	10	41	16	21	14	47
chr8	27198020	27198635	616	54	37	60	35	61	42	30	45	57	94	96	50	63	45	203	110	110	107	87
chr11	7272863	7274221	1359	412	468	354	348	354	316	330	806	984	684	819	335	543	408	1155	767	897	580	927
chr18	899453	899849	397	47	46	68	57	102	32	55	192	131	28	76	46	24	74	31	23	29	23	29
chr15	66517473	66517602	130	9	5	7	5	7	1	6	7	12	10	10	1	7	6	32	11	29	9	14
chr18	24630569	24630764	196	19	15	28	22	44	10	23	57	28	26	45	27	15	38	23	6	8	9	14
chr5	115713931	115714621	691	69	53	62	29	56	24	45	90	53	67	120	88	78	68	232	132	119	86	148
chr5	1685234	1685509	276	24	13	23	9	12	12	13	35	19	19	39	30	42	36	114	48	34	42	82
chr4	163993276	163993690	415	23	47	46	35	60	28	39	64	76	39	52	57	19	44	22	18	17	19	28
chr11	2182144	2182734	591	65	65	49	26	62	62	33	90	61	124	109	87	76	83	197	73	300	123	209
chr10	43724596	43725662	1067	115	114	113	57	112	108	57	181	192	201	154	64	98	81	260	224	230	168	279
chr18	1270147	1270557	411	40	37	57	20	48	54	44	80	103	76	111	66	38	61	45	33	34	9	21
chr8	102243927	102244292	366	20	13	17	20	15	24	9	57	34	17	54	49	28	26	126	51	87	68	34
chr12	72020654	72020849	196	31	17	30	24	62	21	12	46	61	18	41	36	14	29	21	13	9	10	10
chr18	75012622	75012829	208	4	3	13	5	8	6	8	9	23	11	15	10	5	16	53	16	19	20	23
chr11	12854439	12854849	411	68	66	56	77	73	40	48	211	71	73	38	61	50	100	36	40	24	17	38
chr21	30628625	30629233	609	26	29	24	6	34	26	29	25	54	34	46	38	39	47	156	69	47	47	115
chr2	190603913	190604066	154	10	18	9	9	24	17	6	39	27	9	17	13	9	9	5	7	8	1	2
chr4	33026956	33027156	201	23	21	22	15	24	7	19	38	76	24	26	15	27	26	10	12	13	9	9
chr12	31149276	31149574	299	40	30	24	8	15	19	21	23	19	19	64	33	38	20	95	62	67	65	63
chr5	125718746	125719726	981	120	77	128	72	138	78	118	273	286	98	214	97	84	94	94	52	67	72	74
chr6	70939137	70939297	161	15	8	12	11	22	12	20	24	36	10	18	13	7	24	2	9	8	2	6
chr1	87617267	87618013	747	61	60	48	42	49	36	48	91	110	67	114	53	87	85	204	106	96	85	171
chr12	31079279	31079969	691	67	36	31	39	49	26	40	79	105	101	77	48	38	61	134	88	96	86	133
chr4	43278922	43279292	371	33	35	54	29	54	35	31	99	64	33	67	31	51	46	25	24	9	19	35
chr14	21660058	21660719	662	65	57	58	32	32	25	21	93	72	80	94	37	56	47	172	78	123	56	136
chr14	105344779	105345202	424	29	26	32	18	30	19	13	62	34	45	53	20	12	21	81	64	81	25	75
chr12	51930944	51931508	565	35	23	23	25	31	26	24	67	50	38	57	29	34	37	170	44	72	40	66
chr2	127649349	127649941	593	51	43	30	14	41	35	18	27	48	35	35	18	41	47	172	26	139	64	106
chr8	102210844	102211049	206	20	16	17	10	23	8	17	76	57	15	20	11	9	22	8	9	8	5	7
chr4	71620863	71621479	617	65	42	65	76	70	38	64	229	219	51	85	43	47	78	44	27	33	28	49
chr7	155382941	155383598	658	99	59	47	35	59	49	49	81	53	81	118	72	164	94	301	104	245	184	181
chr3	41290514	41290859	346	15	7	24	11	21	2	12	15	36	15	34	7	7	16	7	4	4	3	8
chr18	34833386	34834856	1471	592	514	464	428	394	431	428	1140	1037	902	996	453	559	485	1365	825	963	812	1260
chr7	92384500	92384995	496	42	33	34	20	30	25	27	61	33	65	67	44	48	46	212	60	76	52	90
chr18	44554979	44555546	568	22	12	36	22	65	2	12	9	53	19	10	7	32	1	1	1	9	1	1
chr12	885930	886258	329	37	30	26	33	49	17	30	73	50	25	47	30	24	38	25	13	19	18	14
chr2	104580449	104580618	170	13	10	14	11	12	4	9	26	33	9	14	10	3	8	3	2	1	6	7
chr7	40210025	40210225	201	9	5	13	4	12	5	13	11	13	12	8	2	6	9	2	2	3	2	3
chr1	241991997	241992317	321	52	47	47	29	46	25	29	142	111	45	78	34	34	32	26	32	28	15	23
chr5	112120565	112120922	358	22	34	42	42	50	30	36	162	92	19	63	33	17	40	32	11	21	7	20
chr4	17669269	17669721	453	17	11	11	13	22	14	34	20	37	35	43	21	21	28	90	30	76	36	60
chr5	103767553	103768104	552	56	36	28	10	23	13	46	32	16	40	24	42	52	53	132	88	54	68	235
chr8	95036745	95037538	794	145	175	179	146	200	88	136	371	393	171	179	120	116	192	143	111	82	75	129
chr8	102937100	102937247	148	7	12	10	9	12	5	5	27	20	11	13	10	21	12	6	7	4	1	3
chr1	218155979	218156772	794	63	39	32	25	36	22	29	44	64	43	109	67	62	59	182	94	73	70	155
chr10	67179325	67179669	345	30	36	41	35	51	11	18	60	45	36	47	48	37	55	13	18	16	9	30
chr3	133613389	133615237	1849	273	210	184	225	223	161	168	398	479	493	428	178	215	221	686	380	414	420	496
chr5	56398624	56398907	284	11	19	16	13	6	5	8	13	50	18	7	8	5	10	10	4	1	2	1
chr10	92968730	92969082	353	43	23	34	29	51	33	42	84	37	79	51	65	34	81	24	22	23	14	26
chr5	18375720	18376240	521	47	32	44	17	55	18	24	67	38	60	67	72	130	94	357	133	121	81	180
chr7	56183521	56184432	912	184	128	137	184	157	142	123	254	283	389	348	256	319	211	666	285	523	343	607
chr6	121543865	121544572	708	65	102	83	57	91	79	108	235	267	83	131	105	51	115	74	38	56	52	56
chr6	133519893	133520200	308	17	17	20	12	27	4	7	24	50	14	14	15	15	29	13	4	4	1	12
chr14	95833522	95833692	171	13	10	18	14	8	8	4	31	47	13	18	10	1	11	6	1	6	3	5
chr6	23546223	23546431	209	15	7	11	8	20	5	15	14	16	10	5	17	7	15	3	4	2	2	7
chr4	53727866	53728946	1081	378	373	348	302	249	254	228	576	766	755	656	272	350	303	863	559	733	583	937
chr11	86510924	86511957	1034	285	188	197	171	194	143	194	402	626	524	564	167	220	190	637	447	462	415	635
chr12	94232136	94232310	175	12	3	4	1	6	2	3	16	8	7	11	4	9	8	30	14	17	12	17
chr8	142411285	142412008	724	54	24	35	37	47	19	38	61	41	52	55	20	51	32	206	44	100	64	83
chr7	124701913	124702442	530	123	107	134	103	222	74	146	339	322	97	157	146	58	132	72	77	71	57	79
chr3	135638991	135639140	150	3	10	6	5	7	2	11	11	20	8	8	6	6	9	4	2	2	1	2
chr3	105128330	105128498	169	43	55	33	34	39	18	23	126	49	20	56	30	28	39	18	19	22	11	18
chr15	37203698	37204123	426	61	52	43	32	67	36	34	169	113	78	75	32	60	36	40	26	43	14	28
chr9	86286498	86286658	161	14	8	11	15	12	6	5	36	8	1	17	14	9	11	7	1	3	3	2
chr2	68641	68969	329	22	24	7	19	17	8	11	29	89	29	13	6	14	19	12	9	4	4	1
chr1	166853280	166853836	557	65	39	56	44	41	35	26	61	89	58	99	33	33	62	154	82	117	55	106
chr8	29705887	29706018	132	6	9	3	3	6	14	7	6	19	10	12	4	1	5	28	18	22	15	24
chr6	125622459	125623272	814	313	252	230	181	228	165	168	450	633	426	567	165	267	194	675	462	445	351	662
chr5	49736437	49737724	1288	412	364	315	230	256	301	264	560	618	494	860	382	478	326	1151	560	690	507	977
chr1	156774353	156774808	456	32	31	49	20	25	34	18	67	57	49	85	29	95	46	159	89	83	95	111
chr10	44806215	44807092	878	178	176	126	157	140	105	115	242	468	238	312	140	298	162	544	332	367	280	402
chr7	98464880	98465488	609	69	54	50	42	48	38	27	90	50	53	119	60	56	29	170	73	137	83	138
chr1	156821812	156822769	958	141	94	105	60	126	73	74	132	105	100	218	140	160	122	364	150	378	172	264
chr6	37836331	37836589	259	14	11	31	18	23	8	8	52	65	29	27	8	21	27	8	11	8	6	11
chr1	142821397	142822120	724	64	65	101	38	55	42	40	99	88	88	109	51	50	77	44	40	26	18	61
chr21	29633746	29633899	154	32	18	40	18	28	14	45	76	66	23	44	33	14	38	6	11	23	9	16
chr6	58179870	58180643	774	37	33	14	45	35	31	37	62	79	74	101	44	63	45	153	100	93	85	103
chr7	66927519	66928365	847	26	23	29	39	64	27	30	55	46	38	62	38	53	45	226	71	118	33	94
chr3	36639103	36639478	376	11	11	16	17	28	5	11	23	54	24	26	9	12	14	11	6	7	1	10
chr11	82420177	82420489	313	11	19	18	10	20	7	3	32	33	12	46	38	20	19	79	55	32	24	83
chr1	110072861	110073486	626	82	43	48	37	53	49	43	124	62	90	130	73	80	70	235	108	150	65	203
chr12	40881190	40881502	313	5	5	9	7	19	3	6	5	7	9	9	6	10	11	45	17	14	10	43
chr5	130801973	130802088	116	10	9	21	9	19	7	10	24	39	9	21	2	17	16	5	8	3	5	3
chr18	34973680	34974819	1140	622	465	423	459	412	424	354	876	519	940	1200	615	786	579	1730	920	1464	763	1565
chr15	37829181	37829690	510	35	47	36	36	41	19	28	72	121	51	42	44	12	53	16	16	27	19	17
chr1	120173711	120174689	979	197	154	158	145	141	116	116	347	376	321	268	127	194	149	469	268	354	204	457
chr1	75821150	75821588	439	34	33	23	23	37	10	21	115	57	17	29	21	25	37	19	11	13	6	19
chr4	120457557	120458098	542	53	57	58	85	151	54	80	229	114	54	101	95	54	52	54	35	22	38	40
chr1	18643348	18643591	244	43	12	33	16	15	11	10	21	68	39	20	7	24	6	2	9	8	2	10
chr10	32616269	32616610	342	28	30	20	28	73	14	19	77	53	38	49	42	11	16	19	13	6	14	13
chr15	23601318	23601614	297	6	15	31	1	15	16	16	35	77	8	59	16	5	16	1	10	1	4	2
chr14	42455776	42456240	465	40	85	77	36	65	23	52	87	138	72	54	40	54	55	25	27	38	16	42
chr4	176634602	176634935	334	15	17	19	36	28	13	42	66	37	25	72	40	30	31	20	9	13	11	17
chr5	131601274	131601823	550	116	71	93	82	72	98	64	226	176	172	227	129	158	110	431	137	224	279	239
chr14	23606559	23606941	383	24	7	8	10	12	2	12	10	20	29	16	3	5	18	54	34	33	14	43
chr5	37665967	37666219	253	54	30	56	18	54	27	31	53	63	56	64	38	31	52	119	77	74	67	97
chr4	143193699	143193887	189	18	13	36	16	34	8	14	61	64	6	26	27	17	32	17	9	5	5	11
chr4	48853581	48854006	426	27	27	44	36	50	18	15	103	120	27	42	30	14	22	24	20	10	4	17
chr3	157457118	157457284	167	14	4	19	8	17	5	4	9	26	16	6	7	7	11	4	4	4	1	3
chr13	34212230	34212527	298	61	41	47	38	52	29	45	86	145	40	91	37	34	40	32	27	36	16	36
chr14	74889935	74890288	354	35	32	38	20	32	33	34	104	40	50	87	76	54	55	217	53	121	120	86
chr2	78040603	78041091	489	27	49	52	39	61	28	45	68	78	37	65	51	45	50	30	29	16	25	29
chr5	102333916	102334247	332	17	19	24	14	35	10	28	44	42	11	36	18	8	23	15	5	5	5	17
chr5	133739748	133740097	350	23	32	37	14	39	18	14	76	143	15	55	13	24	15	6	17	15	6	3
chr1	93919417	93919749	333	34	16	32	31	53	14	14	102	88	35	48	15	21	34	18	21	14	9	11
chr4	42857735	42858286	552	61	67	58	48	44	24	39	97	67	47	67	44	37	66	32	26	22	30	36
chr4	63747624	63747947	324	14	32	43	13	27	22	25	35	62	42	16	23	15	29	14	13	13	6	13
chr3	141378612	141379653	1042	136	123	127	109	107	71	68	269	287	216	264	111	142	125	369	213	238	174	282
chr2	170672451	170672783	333	24	24	24	9	17	16	19	60	108	23	31	22	21	24	22	6	13	4	15
chr7	137333014	137333332	319	29	15	28	16	18	11	22	40	68	15	17	32	18	23	12	16	11	5	5
chr5	126564514	126565589	1076	212	151	198	133	165	169	187	284	455	252	490	240	340	190	774	353	376	366	532
chr11	129685485	129686415	931	80	81	91	57	72	55	57	119	164	104	156	55	102	60	263	100	161	138	155
chr7	90590551	90591280	730	127	82	105	94	170	83	128	306	191	102	135	140	77	184	99	78	60	35	92
chr8	54645570	54646199	630	41	19	27	14	35	17	29	32	35	47	87	31	57	53	275	51	58	41	131
chr3	58594435	58594700	266	58	34	39	48	58	35	38	114	35	51	81	82	103	57	109	250	265	52	142
chr2	40108741	40109326	586	31	33	59	38	41	23	26	114	132	53	62	54	45	48	34	18	34	26	19
chr6	142474222	142474669	448	31	41	54	35	43	19	33	92	41	26	34	39	30	27	15	11	26	11	23
chr3	40284619	40284950	332	36	57	26	43	38	14	24	107	154	26	47	49	27	37	18	15	18	14	29
chr18	34982966	34984097	1132	510	325	370	328	400	297	263	771	423	493	912	482	533	515	1252	607	945	624	1098
chr3	159577287	159577649	363	47	26	29	19	20	16	13	20	37	31	32	57	43	31	144	57	58	72	65
chr5	118565563	118566010	448	21	15	24	10	24	17	9	40	117	18	39	22	17	18	8	7	9	5	18
chr5	96507647	96508360	714	46	31	42	37	54	33	43	111	155	53	73	47	38	44	30	30	21	21	45
chr7	16594404	16594799	396	16	18	20	6	22	1	16	33	60	18	16	9	7	21	12	5	4	1	8
chr5	63801585	63803227	1643	329	317	251	236	278	238	198	597	524	395	550	328	325	302	789	395	539	467	646
chr4	159788204	159788374	171	20	9	15	13	21	7	16	79	33	12	16	21	9	17	12	11	2	1	6
chr4	154680741	154681412	672	62	35	29	13	48	14	19	64	86	84	64	18	56	32	123	114	110	54	92
chr4	26949807	26950117	311	18	4	10	10	8	10	9	9	9	9	14	11	17	10	59	27	14	20	31
chr17	38380599	38380934	336	18	10	8	3	8	6	6	12	49	15	32	9	5	8	2	9	1	1	3
chr2	158047272	158047653	382	14	13	21	16	27	12	40	65	25	25	25	32	18	31	16	9	11	8	8
chr4	91810476	91810624	149	25	36	30	19	28	10	14	56	39	9	24	24	14	26	10	11	12	7	11
chr2	48448743	48449402	660	107	72	122	85	66	60	86	191	245	76	109	96	62	109	74	50	49	55	67
chr3	37582284	37582669	386	32	10	18	11	24	5	29	25	27	30	34	24	50	59	172	53	66	27	119
chr7	132070985	132071326	342	48	25	35	16	24	12	8	35	28	40	40	44	44	45	118	64	74	48	83
chr1	191026507	191026885	379	32	18	16	11	34	2	10	19	22	22	32	16	24	12	52	58	27	35	74
chr10	43571921	43572989	1069	109	73	60	95	124	67	51	167	197	232	211	57	137	72	231	276	257	229	205
chr5	124225210	124225587	378	16	20	31	24	41	29	21	75	156	39	44	16	26	29	20	12	20	11	12
chr7	35762746	35762942	197	37	17	28	38	18	18	9	69	73	29	31	10	40	35	17	10	19	3	13
chr8	90909347	90909701	355	65	65	60	76	75	66	69	208	234	54	83	78	36	91	48	35	36	23	68
chr4	151439573	151440124	552	78	57	74	61	77	43	46	163	230	42	110	60	43	47	56	35	31	27	51
chr11	102253230	102253549	320	17	11	19	4	9	10	8	28	54	7	18	10	17	15	3	4	5	4	10
chr13	102938696	102939192	497	39	106	74	58	128	60	62	218	236	45	39	92	51	64	40	38	33	26	36
chr13	98047793	98048159	367	27	23	24	16	34	13	28	87	100	29	33	27	16	25	14	17	12	14	11
chr3	6902237	6903613	1377	95	72	63	51	101	66	101	159	127	99	189	63	123	78	419	135	187	206	126
chr10	45472472	45472723	252	19	35	41	21	27	34	25	39	40	58	98	47	26	41	102	60	64	188	67
chr8	42052781	42052920	140	11	13	5	7	9	13	7	24	24	13	19	16	16	18	29	23	40	25	41
chr8	131477088	131477214	127	11	9	17	16	12	2	3	23	22	15	8	18	5	11	7	3	5	1	4
chr7	78001757	78002066	310	21	19	27	24	31	22	37	56	40	11	58	41	6	30	9	8	4	6	25
chr2	80167605	80167827	223	21	14	12	14	13	12	12	30	25	22	40	15	66	34	104	21	85	63	71
chr11	8102164	8103738	1575	145	79	114	103	103	68	71	232	276	285	236	81	112	93	280	228	270	172	375
chr1	84908871	84909192	322	8	8	8	4	3	8	6	17	19	32	19	18	14	12	59	20	29	17	42
chr18	52379569	52380013	445	28	34	49	24	31	10	28	86	154	18	31	21	27	31	12	14	12	12	20
chr7	143533427	143534618	1192	189	289	279	229	201	142	180	644	635	542	958	202	387	267	900	588	577	619	851
chr2	143950624	143951255	632	26	20	27	14	32	9	18	20	31	26	45	20	31	36	136	38	44	31	64
chr16	9935020	9935501	482	35	34	34	34	59	24	34	105	34	30	42	32	23	31	29	7	13	8	32
chr1	107869617	107870022	406	25	16	20	11	29	8	22	17	26	22	29	28	35	34	109	73	15	33	108
chr8	131443055	131443450	396	34	25	40	50	27	14	20	86	59	32	40	30	20	22	22	20	17	11	6
chr4	65520173	65520340	168	2	3	5	2	7	2	2	5	9	5	4	1	1	4	12	7	5	15	18
chr11	122589687	122589946	260	12	5	5	2	17	6	2	3	14	13	2	2	2	9	70	8	20	4	53
chr5	14476864	14477323	460	34	22	22	28	34	24	16	66	65	18	26	27	14	38	15	1	10	11	25
chr1	239729585	239729779	195	20	16	32	24	17	13	34	38	48	16	24	31	17	29	18	11	5	13	8
chr18	30881187	30881374	188	19	12	11	8	26	1	14	7	32	16	18	7	5	14	4	2	6	1	7
chr12	6193483	6193654	172	13	5	12	1	7	5	2	9	13	12	7	2	6	11	42	22	26	5	16
chr4	98326122	98326309	188	9	5	15	4	5	10	11	8	7	14	18	8	12	21	48	30	18	17	36
chr12	105772661	105772832	172	18	15	11	19	16	2	16	43	16	18	29	21	10	29	1	10	3	6	9
chr12	1224710	1225342	633	69	39	107	36	39	24	40	63	100	68	67	22	20	53	38	29	18	16	18
chr14	36574729	36575092	364	50	42	37	32	28	58	38	125	155	41	62	34	32	43	36	18	25	21	28
chr2	131792110	131792991	882	97	71	36	74	70	44	41	191	87	202	177	60	108	85	235	165	200	160	272
chr1	164679254	164679443	190	29	20	12	20	25	6	13	75	64	9	24	17	12	8	4	6	7	5	13
chr3	98240946	98242146	1201	1161	1156	1062	831	731	833	801	1706	2673	1678	2083	852	1338	1093	2401	1741	2117	1690	2768
chr18	7950601	7951021	421	126	175	117	90	112	59	58	280	365	118	140	96	63	129	62	86	69	38	66
chr9	16278397	16278924	528	36	20	22	9	19	20	8	27	39	32	45	20	48	53	157	42	60	39	85
chr5	113512170	113512593	424	25	38	30	45	49	41	53	101	110	49	67	81	32	67	26	37	23	17	25
chr2	192343859	192344609	751	82	67	76	53	68	65	71	120	110	100	176	107	134	119	356	148	177	106	234
chr10	71239014	71239658	645	44	43	9	26	31	22	31	35	45	34	43	36	49	35	156	37	85	77	83
chr5	100133615	100133837	223	35	43	56	20	47	35	29	81	116	33	52	41	18	75	17	18	34	16	18
chr5	131594936	131595413	478	57	30	27	30	44	28	14	87	44	73	75	47	59	61	128	80	96	62	163
chr7	31068130	31068770	641	39	43	33	24	58	38	47	62	35	89	87	58	92	55	222	89	168	84	120
chr14	78432143	78432782	640	142	85	88	71	87	80	54	175	208	160	249	118	166	86	368	160	193	202	280
chr9	96387419	96387573	155	17	6	18	12	21	4	4	58	28	8	6	16	5	16	3	1	7	3	5
chr17	28177187	28177437	251	28	25	30	28	23	18	25	66	92	27	48	30	28	29	26	25	6	14	13
chr3	172682060	172682420	361	48	36	47	56	91	33	69	164	86	29	81	63	35	68	18	32	25	24	35
chr2	69249609	69249939	331	21	20	18	8	23	4	18	27	88	9	19	6	2	13	9	5	3	2	6
chr12	92528474	92528903	430	108	133	116	139	168	86	141	395	236	121	206	95	92	141	117	66	85	61	107
chr9	12748025	12748440	416	40	46	65	109	53	40	52	159	228	49	77	84	73	79	48	33	40	24	43
chr12	8191085	8191856	772	295	204	269	212	233	261	247	522	486	362	634	350	501	365	1049	551	601	597	576
chr17	40219271	40219588	318	44	22	45	16	18	24	14	30	41	30	31	10	13	26	22	11	12	4	7
chr1	57490533	57491038	506	35	19	12	36	17	12	16	43	19	14	33	19	27	22	134	37	53	45	41
chr9	74920030	74920517	488	92	69	59	49	64	40	36	119	73	47	48	140	76	61	534	102	263	64	121
chr2	182273541	182273797	257	5	5	4	5	8	6	7	7	15	9	8	6	10	8	30	15	7	42	11
chr2	181474326	181474939	614	58	87	104	79	162	56	124	232	90	53	105	110	65	129	53	32	50	27	73
chr14	90988957	90989541	585	91	67	61	62	79	44	74	184	88	136	226	55	105	99	275	101	222	129	299
chr2	85999060	85999964	905	181	138	157	127	137	83	90	279	285	272	326	136	200	147	625	228	257	179	424
chr1	110713628	110714423	796	92	73	64	40	82	62	57	139	68	90	185	88	140	82	283	126	238	129	212
chr11	30606772	30608476	1705	289	412	211	311	253	293	256	547	686	465	507	216	409	274	1126	512	601	510	815
chr7	89840401	89841654	1254	669	619	491	423	349	392	380	948	1367	768	1338	527	663	548	1479	849	1042	927	1396
chr4	108775295	108775582	288	30	15	14	21	24	22	16	68	53	22	31	16	14	27	8	19	6	4	16
chr7	64126139	64126981	843	447	408	342	271	297	223	274	684	772	538	804	373	529	421	976	572	690	593	890
chr14	30150482	30150787	306	17	18	22	10	23	11	23	45	86	15	29	9	9	20	15	2	14	2	9
chr6	90209040	90209205	166	10	9	11	4	29	8	4	35	42	8	17	7	4	7	3	3	8	1	2
chr18	35056563	35057104	542	52	36	28	18	37	29	13	63	44	40	72	41	57	22	137	70	59	62	107
chr21	27901193	27901622	430	53	47	68	37	40	20	48	146	151	22	52	46	36	22	38	10	29	12	25
chr21	18147300	18147922	623	78	46	62	27	58	40	29	54	77	101	84	85	100	88	243	129	160	78	165
chr4	186603466	186603768	303	20	18	19	6	9	4	7	38	96	11	18	13	6	22	5	7	6	2	6
chr4	40845170	40845376	207	32	28	14	12	16	13	25	34	41	32	43	30	29	28	91	57	58	52	30
chr7	109391396	109391568	173	19	33	38	21	24	16	24	45	48	20	29	16	17	22	15	16	12	10	10
chr8	59763293	59763674	382	42	35	44	37	66	27	26	125	95	32	45	44	31	82	33	17	26	20	29
chr1	238315508	238315664	157	13	29	20	32	23	6	15	78	39	22	27	18	16	22	10	11	11	7	11
chr14	97510935	97511141	207	21	12	10	14	16	7	12	19	10	12	14	6	8	27	5	5	6	1	7
chr12	30975205	30976356	1152	322	439	242	275	166	301	260	672	535	528	901	303	324	355	1240	367	768	722	1063
chr1	100017713	100017881	169	18	17	33	7	19	5	11	15	19	9	12	18	5	6	7	1	4	1	9
chr5	108722970	108723888	919	123	142	154	127	190	118	176	400	318	172	250	163	114	205	116	99	120	77	152
chr2	135332067	135332522	456	38	20	24	27	28	20	23	46	34	45	65	66	21	36	150	44	70	55	93
chr14	61230468	61230667	200	8	5	15	6	15	6	4	15	29	8	13	6	6	12	4	1	1	3	8
chr3	134320853	134321594	742	106	76	65	80	84	106	74	174	97	147	193	98	153	100	349	118	269	232	242
chr12	74499933	74500096	164	4	3	5	5	10	4	7	13	23	10	6	4	6	10	3	1	4	1	2
chr5	64197869	64198283	415	52	61	54	57	55	39	65	130	80	69	69	99	60	94	34	35	37	38	37
chr8	62015957	62016376	420	22	28	30	23	42	18	25	89	130	22	40	23	23	37	23	20	18	8	12
chr17	20858048	20858339	292	12	5	17	4	5	11	4	6	57	4	10	4	10	4	4	2	2	1	2
chr11	96653862	96654167	306	32	21	18	13	30	7	11	21	53	25	13	12	7	19	15	5	5	2	12
chr21	29706169	29706978	810	60	57	74	48	65	64	80	200	273	46	179	77	71	56	72	41	45	34	29
chr11	105843712	105844016	305	18	20	15	34	51	28	29	105	53	18	41	37	18	36	20	14	15	10	13
chr10	60144032	60145771	1740	618	378	488	437	387	319	330	887	1259	746	1011	411	494	602	1297	639	829	811	1231
chr3	109503131	109504259	1129	117	126	179	128	208	61	94	463	234	107	163	143	87	147	78	75	69	56	113
chr15	47808819	47808982	164	19	10	20	10	18	4	7	33	48	18	14	15	7	31	9	5	2	8	8
chr3	98311860	98313004	1145	621	506	474	413	348	379	419	1072	1338	834	1333	511	626	534	1520	912	857	907	1354
chr1	164289954	164291009	1056	80	83	66	43	48	35	45	103	129	121	157	62	101	66	214	135	126	120	152
chr3	151471771	151472011	241	12	22	18	15	7	11	16	42	98	18	16	11	8	13	11	4	7	2	10
chr2	167350422	167351099	678	96	52	71	38	74	27	40	95	79	111	144	78	128	72	217	202	144	101	172
chr5	78407837	78408326	490	28	18	27	14	17	12	9	33	31	24	34	18	18	20	75	39	35	24	46
chr7	138609241	138609426	186	8	1	5	4	6	7	9	1	4	6	13	9	10	10	22	13	19	24	26
chr2	149502818	149503186	369	43	48	60	49	83	35	40	206	169	31	72	62	43	48	46	26	23	28	34
chr2	98653021	98653576	556	55	25	39	30	54	52	28	91	63	56	83	53	68	58	180	63	158	79	103
chr12	42326012	42326899	888	176	144	95	119	144	101	126	230	293	281	311	178	244	196	459	346	251	261	441
chr7	129536398	129536803	406	34	31	58	37	36	20	23	84	85	28	57	23	23	14	25	17	12	11	26
chr10	48354391	48355323	933	411	411	322	373	392	382	352	838	780	710	784	406	578	447	1013	718	1028	773	872
chr7	44952397	44953199	803	106	66	86	59	77	61	60	142	91	81	156	92	94	90	258	115	176	121	171
chr5	58575914	58576151	238	34	44	35	31	59	19	34	125	90	36	46	57	33	47	23	13	36	15	28
chr7	66501550	66502298	749	59	60	52	32	78	42	49	60	73	49	151	78	73	63	274	107	158	75	128
chr9	73447288	73447719	432	35	32	35	39	60	13	23	164	130	28	67	18	7	35	18	11	16	9	23
chr21	16870886	16871184	299	15	22	34	15	31	9	15	42	100	32	23	27	25	25	9	12	11	8	19
chr2	186415505	186415744	240	25	26	36	21	30	9	16	63	50	10	17	40	12	35	11	18	7	7	6
chr7	7856108	7856358	251	14	6	11	10	14	10	11	15	105	5	16	7	9	16	3	5	5	1	6
chr6	107951685	107951940	256	23	19	23	22	43	15	20	89	42	1	25	15	4	13	15	4	4	5	5
chr2	147866158	147866393	236	36	30	29	23	28	20	16	26	71	14	31	27	25	19	23	7	6	15	13
chr2	112539316	112539517	202	11	5	14	10	7	1	4	19	43	18	21	13	7	15	10	2	4	4	1
chr5	170558401	170559004	604	27	76	48	32	39	23	51	108	59	47	56	79	30	45	37	20	25	14	28
chr2	137205918	137206347	430	27	13	16	26	40	8	18	22	33	42	29	17	38	21	134	48	57	22	74
chr7	111048324	111048597	274	32	27	26	38	34	38	31	121	70	28	36	16	8	33	18	10	10	16	18
chr7	8473065	8474353	1289	142	147	96	102	107	76	87	243	240	270	231	137	133	156	357	262	266	141	368
chr4	71697051	71697377	327	30	35	33	13	51	28	20	134	117	47	39	74	37	38	21	14	20	16	29
chr11	47132911	47133291	381	23	24	21	18	28	7	20	26	20	21	55	40	29	41	112	62	64	34	56
chr7	86688237	86689623	1387	649	569	503	406	351	405	492	1151	1230	1092	1389	420	771	511	1473	1028	1322	891	1564
chr2	76689789	76689960	172	8	5	11	1	9	5	3	13	6	20	6	4	4	6	3	2	2	1	1
chr3	144112879	144113345	467	67	81	81	50	82	51	41	91	160	45	48	68	44	87	26	42	38	11	48
chr13	84615074	84615541	468	38	43	47	34	31	23	34	66	146	25	51	29	24	35	23	19	19	14	30
chr17	2842733	2842964	232	11	8	7	28	9	4	10	24	11	13	12	8	2	7	6	3	3	2	2
chr10	60590400	60590731	332	19	37	20	22	35	24	12	58	26	28	23	34	34	37	15	7	20	2	18
chr20	6957222	6957504	283	3	14	13	10	10	4	9	21	95	8	18	12	12	9	8	7	1	1	2
chr2	60033663	60033888	226	15	7	10	6	9	4	4	10	12	15	20	14	25	15	80	19	30	23	18
chr5	34582367	34582743	377	42	20	31	4	25	18	14	26	42	25	43	28	19	40	151	32	87	18	83
chr3	3840339	3842720	2382	394	398	379	248	271	246	275	720	754	704	889	286	421	284	928	728	647	632	837
chr3	183642954	183643192	239	12	22	17	19	19	9	9	39	64	26	19	17	10	14	12	3	7	7	14
chr5	28810242	28810487	246	10	8	10	3	13	2	8	7	11	5	11	6	8	6	27	17	15	22	16
chr1	247038702	247039007	306	16	18	33	13	13	12	8	57	90	26	21	18	14	23	9	10	7	7	14
chr5	141126667	141127186	520	92	56	86	61	91	60	69	174	94	99	127	100	87	78	248	87	206	151	185
chr9	106566508	106566978	471	36	33	46	44	29	22	34	88	111	27	63	60	53	42	26	32	22	21	15
chr5	100094122	100095828	1707	266	253	396	325	404	246	465	523	271	534	670	552	335	673	227	138	326	112	240
chr7	77981704	77981939	236	22	18	41	19	25	4	22	40	25	25	42	17	11	19	15	10	13	3	10
chr9	115020498	115020689	192	18	13	14	42	21	13	16	49	13	17	21	18	29	22	10	6	12	7	6
chr5	160741067	160741359	293	31	28	36	17	37	14	17	39	56	34	34	25	16	19	9	20	9	8	21
chr4	57687312	57688024	713	111	83	82	80	37	30	41	106	221	136	109	92	97	87	256	158	164	106	272
chr6	121339957	121340671	715	53	60	66	90	146	36	40	225	124	95	98	111	76	106	27	29	36	59	40
chr6	152316856	152317015	160	13	16	17	25	44	11	18	85	14	20	34	14	18	17	10	8	3	8	13
chr5	37248737	37250085	1349	372	326	353	313	367	282	341	838	846	725	898	289	350	313	1072	659	723	581	841
chr4	68017129	68018127	999	49	57	52	43	69	24	41	104	69	67	93	43	66	60	187	68	81	98	147
chr10	58879344	58879874	531	33	18	28	14	40	15	15	38	38	28	53	61	40	46	88	54	117	33	122
chr11	2179543	2179862	320	27	28	24	13	39	19	21	62	53	80	72	47	32	26	83	58	136	51	86
chr4	133452031	133452330	300	16	37	20	13	15	16	27	37	31	17	41	22	27	22	14	5	16	6	15
chr1	152025813	152026291	479	34	55	32	39	41	33	33	80	32	50	98	54	76	36	176	96	105	61	135
chr12	62756158	62756720	563	62	76	79	52	92	37	95	230	94	51	92	68	50	84	51	42	32	27	55
chr6	143154021	143154687	667	121	158	169	138	145	70	100	404	518	142	205	98	113	151	130	72	103	61	112
chr5	89853921	89855114	1194	1337	1208	1167	857	854	879	1012	2005	2790	1958	2508	1061	1509	1359	2646	1740	2569	2076	2841
chr7	123672122	123673767	1646	224	265	186	236	218	195	187	531	594	500	571	248	442	242	795	542	527	473	655
chr8	67344507	67345101	595	381	324	251	261	227	234	214	515	642	544	637	303	406	324	853	466	643	477	717
chr3	179246534	179246858	325	62	56	56	54	67	48	43	133	173	54	81	48	35	52	30	22	56	24	42
chr8	143588718	143589226	509	44	22	31	29	49	18	14	31	36	31	54	15	8	23	67	56	106	44	66
chr7	63767146	63768308	1163	969	672	743	447	479	572	573	947	1370	834	1414	876	1159	926	1936	1173	1581	1302	1947
chr4	149464303	149464747	445	38	60	37	44	70	34	30	97	97	26	40	44	22	44	29	17	21	16	34
chr8	68498900	68499119	220	9	20	28	10	25	12	12	31	70	7	18	17	9	17	11	8	5	6	6
chr10	75522745	75522983	239	16	19	17	19	23	10	13	47	70	14	19	4	10	5	1	8	5	1	12
chr6	116212278	116212731	454	57	65	50	55	37	24	29	146	257	46	72	25	38	48	31	29	29	14	30
chr1	171810110	171811058	949	291	282	193	230	212	178	149	444	507	518	537	221	232	226	625	459	543	308	708
chr8	81152730	81153449	720	188	163	161	124	122	141	115	271	366	191	335	141	197	168	491	198	287	285	373
chr11	71075118	71075582	465	36	20	17	10	29	16	16	35	19	35	36	22	20	37	104	39	76	20	62
chr6	2688735	2689079	345	33	47	23	21	25	16	16	49	105	24	46	25	17	31	17	18	12	13	16
chr9	38004017	38004330	314	61	24	25	26	23	17	44	64	22	45	37	14	55	43	131	59	123	53	97
chr9	80421843	80422539	697	62	36	68	82	74	34	44	149	166	71	74	62	43	62	45	33	35	30	54
chr1	187614757	187615178	422	30	6	14	11	11	7	7	21	21	14	32	16	16	27	100	21	26	16	65
chr9	15020199	15020358	160	9	6	9	6	6	3	16	3	10	9	11	2	4	11	4	3	1	1	1
chr8	124852231	124852634	404	35	53	36	46	72	43	36	166	201	54	78	66	32	73	24	26	39	23	41
chr9	17990591	17990813	223	23	28	21	10	40	11	18	57	50	29	46	15	12	35	16	16	6	14	6
chr15	57463815	57463990	176	6	15	22	17	13	7	8	63	21	9	33	26	17	10	12	2	4	9	3
chr11	38469864	38470352	489	17	10	12	19	31	6	17	28	44	35	38	27	10	21	67	44	24	40	78
chr6	79410795	79411577	783	87	93	91	51	108	60	69	188	231	65	82	99	46	138	62	34	50	25	86
chr7	8429347	8430059	713	108	80	32	98	62	128	122	192	119	108	124	101	92	106	357	112	298	239	320
chr6	128833528	128833705	178	28	24	48	36	33	33	32	52	63	32	54	47	18	35	30	22	21	8	21
chr6	125282879	125284860	1982	693	608	501	499	469	414	507	1099	1399	1080	1262	462	661	523	1495	1030	1000	917	1430
chr14	54423275	54423446	172	9	8	4	6	10	9	25	21	29	46	15	26	36	21	36	115	68	18	68
chr5	133741506	133741720	215	17	23	16	26	49	11	8	69	19	21	13	11	9	14	13	2	3	4	13
chr7	105234658	105234901	244	27	8	21	17	17	24	26	18	19	25	38	44	31	26	147	55	36	37	80
chr8	58476627	58477277	651	113	113	150	149	139	85	121	360	210	162	220	129	117	146	131	74	96	99	74
chr5	16583119	16583382	264	25	8	18	13	13	6	13	25	30	16	55	23	19	18	92	49	34	16	46
chr4	125963174	125963603	430	44	49	99	69	39	42	60	94	82	62	68	67	52	65	36	34	49	9	34
chr21	46193433	46193821	389	25	29	17	26	20	19	23	27	33	33	63	62	60	44	161	55	75	67	93
chr10	64314529	64314859	331	21	21	24	18	11	15	22	26	48	33	49	27	40	24	79	51	41	42	66
chr3	149563470	149563782	313	20	28	34	42	55	19	21	92	74	32	44	22	35	42	32	20	13	17	13
chr2	115374067	115374752	686	50	69	58	22	54	22	40	93	191	38	52	45	67	61	23	26	37	15	35
chr8	61796292	61796486	195	18	21	15	16	13	7	8	27	42	15	15	13	6	15	14	9	2	2	7
chr3	128524731	128524950	220	18	40	38	29	26	9	7	51	30	30	22	14	20	28	10	4	6	16	12
chr15	78380667	78380835	169	8	5	18	4	11	1	4	18	51	8	4	12	4	4	1	5	1	1	2
chr8	106312799	106313088	290	12	23	20	16	20	23	17	32	72	23	31	18	18	34	20	4	12	14	6
chr12	65339786	65340630	845	87	67	58	27	53	45	34	77	54	75	104	71	92	72	223	125	95	92	185
chr2	10755103	10755514	412	45	34	36	35	51	18	39	97	66	40	23	28	18	13	25	8	14	9	28
chr1	68334976	68335176	201	8	2	6	9	7	1	3	12	9	6	14	9	9	11	43	16	10	14	18
chr14	57556660	57557091	432	23	48	43	66	48	24	37	74	126	23	26	49	18	67	20	14	19	2	34
chr8	116962410	116962587	178	6	15	12	9	19	5	8	15	41	16	21	6	14	10	2	6	9	1	6
chr12	40879978	40881012	1035	37	9	37	19	43	10	20	43	32	19	22	8	16	24	124	35	61	14	128
chr10	68875797	68876081	285	88	81	83	79	110	55	83	170	101	123	124	119	52	92	84	57	50	22	75
chr6	69436301	69436566	266	10	16	8	4	12	9	14	23	14	19	20	22	25	21	97	28	20	18	60
chr3	165771435	165771629	195	8	5	9	1	22	3	4	8	5	6	7	3	10	15	4	1	1	1	2
chr10	99343842	99344273	432	43	45	41	42	27	16	26	46	67	72	70	28	45	31	126	54	102	73	71
chr10	49805913	49806811	899	73	41	35	27	50	29	34	63	43	56	62	32	54	66	211	115	96	36	95
chr3	64430545	64431449	905	102	81	115	75	57	66	85	189	206	195	252	80	95	57	265	208	183	199	213
chr2	183371299	183371827	529	35	13	19	8	16	5	8	28	27	34	37	22	26	39	99	29	50	31	62
chr5	23980793	23980952	160	13	5	13	13	15	2	11	13	3	7	18	5	5	5	3	2	3	1	4
chr7	127358346	127358780	435	37	16	19	28	21	17	18	57	27	35	53	32	55	28	176	35	55	73	57
chr12	83045362	83045576	215	44	14	21	11	13	12	13	24	53	25	23	29	18	9	115	43	23	44	47
chr4	56369288	56369741	454	40	44	63	59	62	33	50	144	108	21	79	42	35	59	19	19	24	29	41
chr14	70345862	70346664	803	142	147	112	94	130	100	87	227	364	207	250	104	139	90	324	229	236	226	286
chr13	24749649	24749951	303	37	30	61	28	91	20	54	166	84	47	72	32	23	39	45	20	18	21	13
chr7	56270	56661	392	36	16	34	14	29	19	12	60	38	37	65	32	41	35	122	31	103	62	49
chr8	72468659	72469633	975	53	51	37	52	41	27	31	83	78	65	99	35	40	41	149	52	83	90	113
chr18	11747824	11748016	193	17	4	12	6	18	2	9	19	14	15	11	15	17	9	42	26	28	12	42
chr4	80519927	80520340	414	44	24	14	13	19	15	15	22	24	16	23	4	38	35	87	52	29	47	91
chr14	62543453	62544596	1144	82	61	63	31	42	34	38	78	48	65	105	63	76	90	258	100	105	111	111
chr14	42359812	42360536	725	214	338	255	329	393	192	371	517	331	283	415	533	267	493	239	161	256	107	178
chr1	167752190	167752435	246	7	10	10	6	10	2	6	13	59	12	17	1	2	10	4	1	3	3	2
chr1	77747312	77748828	1517	130	140	110	92	140	100	101	279	338	238	310	121	180	134	425	245	233	198	344
chr12	259297	259574	278	14	3	8	17	8	4	10	14	15	19	17	11	27	9	107	17	31	25	19
chr3	193621425	193622255	831	39	15	40	26	51	11	34	75	37	34	39	54	42	46	157	53	77	58	112
chr5	115697060	115697803	744	99	66	88	42	135	66	88	157	219	132	177	94	93	81	265	161	176	153	193
chr7	15377301	15377608	308	25	9	11	9	22	10	8	30	17	22	38	20	16	24	72	49	23	28	38
chr12	42311766	42312075	310	13	10	17	8	21	6	7	15	21	13	32	16	18	20	61	13	34	22	58
chr4	22516723	22518165	1443	593	573	495	415	328	353	446	984	1250	1250	1394	408	618	473	1365	1157	1159	840	1568
chr4	169045247	169045913	667	92	69	96	73	106	76	90	195	285	42	161	76	96	72	65	50	58	34	77
chr18	20079550	20079738	189	13	7	15	7	7	2	14	9	37	15	41	9	14	10	6	8	4	3	1
chr4	185855542	185855900	359	6	4	3	12	4	4	7	11	9	7	18	7	13	11	54	15	7	35	14
chr10	9066216	9066549	334	24	33	32	23	36	25	25	35	79	29	41	40	35	26	11	13	22	16	23
chr1	85224631	85225635	1005	67	85	70	61	42	52	50	132	88	66	111	88	68	54	221	101	131	101	162
chr16	75109132	75109598	467	25	5	17	22	28	13	15	52	30	23	61	24	26	33	136	34	69	59	28
chr12	105252788	105253311	524	75	86	80	75	107	46	61	227	156	80	123	97	63	104	61	50	46	63	56
chr7	158823155	158823828	674	69	45	65	78	56	49	52	133	160	135	150	66	76	64	196	125	166	97	163
chr7	15237226	15238540	1315	254	223	248	178	300	157	259	494	325	198	428	240	163	246	245	156	179	111	163
chr2	135358839	135359083	245	11	13	7	11	20	10	13	26	22	24	22	16	11	15	56	30	17	28	41
chr7	55000467	55001441	975	198	206	161	80	109	86	90	212	387	255	349	121	225	162	420	291	330	264	404
chr4	99579152	99580409	1258	539	396	352	352	235	320	320	808	1086	743	1019	314	479	401	1126	803	809	698	1036
chr15	79172559	79173481	923	73	48	33	83	119	31	35	194	103	57	45	58	31	63	38	35	29	11	33
chr10	73286720	73287350	631	97	69	76	28	59	54	44	60	52	115	116	94	90	89	244	103	190	140	181
chr5	103110410	103110846	437	49	49	59	37	68	17	38	146	271	25	54	37	23	49	35	28	21	12	21
chr7	45603889	45604631	743	51	20	29	4	26	18	15	33	36	30	32	24	18	14	152	47	34	38	50
chr12	125242782	125243197	416	29	16	22	10	24	12	15	44	16	32	30	13	8	26	95	17	38	39	70
chr8	98432361	98432533	173	18	39	34	15	39	22	35	131	51	34	60	37	23	34	23	20	13	18	14
chr7	130003194	130003680	487	80	69	164	76	103	66	109	200	346	86	181	52	88	72	111	51	41	34	73
chr1	108074967	108075549	583	170	149	124	73	107	112	108	118	146	133	236	160	243	118	461	268	315	202	351
chr15	36166506	36166822	317	48	50	47	35	36	26	33	109	121	36	68	68	46	46	45	30	27	20	33
chr13	19183358	19183751	394	12	27	24	28	19	2	9	37	12	14	15	12	9	29	9	3	11	2	4
chr3	101497671	101498745	1075	629	614	582	475	477	487	482	1296	1241	1057	1145	495	605	552	1469	892	1111	824	1458
chr18	24443055	24443805	751	129	125	103	92	116	74	111	209	227	180	413	147	233	114	343	260	273	274	381
chr4	54601342	54601530	189	4	5	4	12	9	2	7	6	8	3	7	13	4	10	5	1	1	1	1
chr21	29514925	29515447	523	49	37	69	37	91	24	40	177	285	59	112	57	51	68	28	34	34	33	37
chr14	81042152	81042457	306	20	41	29	37	26	43	24	78	111	23	49	50	20	67	18	10	24	14	27
chr10	48361214	48362121	908	89	67	83	52	72	47	53	113	91	119	125	70	138	93	241	86	249	149	165
chr13	97977818	97978292	475	44	38	39	27	44	43	23	134	94	43	74	49	44	54	36	35	28	14	30
chr5	16178892	16180679	1788	217	216	124	156	126	129	118	334	583	399	491	144	264	157	642	432	327	356	556
chr8	74415422	74415948	527	31	24	30	32	43	8	29	79	47	32	31	15	15	25	13	14	8	14	19
chr9	97780685	97781197	513	119	77	102	73	96	69	69	281	330	166	128	73	70	93	68	68	72	36	86
chr18	54569804	54570104	301	32	35	41	38	42	28	49	63	77	48	58	34	29	42	36	17	30	24	21
chr7	105258068	105258656	589	30	15	18	14	37	14	24	42	20	35	50	23	20	30	141	28	37	39	81
chr7	45128393	45129392	1000	167	205	114	179	157	162	120	351	328	420	453	143	200	203	585	311	520	300	444
chr1	247718988	247719251	264	16	11	5	2	8	1	2	28	8	12	3	4	5	8	2	1	1	1	4
chr14	25385466	25385722	257	51	41	53	44	43	40	46	79	111	54	58	42	21	41	32	18	29	34	26
chr9	80541150	80541459	310	16	12	17	3	16	7	9	52	21	18	27	10	8	16	8	4	7	4	9
chr14	28253333	28253455	123	17	22	21	11	8	17	12	23	25	30	16	23	13	22	6	9	5	8	12
chr4	141737886	141738423	538	22	14	22	9	32	17	13	30	45	35	43	50	24	31	150	36	60	25	76
chr9	105322152	105322480	329	16	13	11	20	23	20	20	40	24	33	34	31	26	19	18	13	3	6	15
chr7	133482832	133483365	534	28	37	46	48	63	28	24	108	106	59	30	42	11	42	28	19	21	17	21
chr9	14779691	14780640	950	38	40	26	33	55	28	38	57	56	37	97	67	92	57	301	92	50	80	163
chr1	199790241	199790859	619	21	12	30	4	22	10	27	35	23	23	29	23	49	24	73	52	46	121	26
chr10	45477596	45477861	266	104	35	74	64	76	58	67	133	141	65	150	93	102	118	245	95	180	187	189
chr3	117309585	117309758	174	3	7	8	5	5	4	7	9	47	11	7	4	2	6	3	2	3	1	1
chr3	117256944	117257124	181	20	18	17	6	27	8	7	32	41	12	11	7	7	14	6	9	5	2	7
chr10	82037259	82037919	661	57	34	64	43	49	39	34	63	85	69	101	89	130	105	273	66	209	126	170
chr12	50262795	50263446	652	100	98	55	114	68	80	36	159	60	83	124	74	144	58	442	124	190	167	239
chr15	93365047	93365476	430	44	42	48	47	66	32	38	109	99	108	63	48	44	58	38	33	33	13	53
chr8	67454059	67455072	1014	143	101	100	84	90	94	104	200	199	220	247	172	205	175	470	235	270	169	344
chr6	127734022	127734783	762	36	49	28	25	31	22	24	38	43	44	76	35	20	27	118	44	88	64	55
chr1	58715524	58716369	846	74	69	59	67	79	55	41	170	94	111	221	65	117	78	227	136	161	179	175
chr11	114717134	114717564	431	31	8	24	15	33	14	16	30	38	10	46	13	28	37	94	53	61	16	81
chr15	22506047	22506175	129	12	6	17	9	15	4	4	9	21	11	10	9	13	8	3	5	5	1	5
chr11	28504306	28505044	739	41	34	24	15	25	22	54	47	56	37	66	30	44	45	71	90	80	72	83
chr1	40234955	40235134	180	13	9	1	7	4	5	5	8	5	12	17	8	13	6	36	16	18	23	16
chr13	84660172	84661118	947	81	80	33	72	80	47	61	70	169	85	77	54	71	55	168	162	115	88	244
chr14	104298413	104298768	356	34	35	40	30	33	16	12	128	115	29	39	29	38	38	19	21	20	4	26
chr16	53225506	53225670	165	16	5	10	4	9	6	6	54	17	3	10	13	4	8	7	1	4	2	1
chr14	19785801	19786019	219	17	12	10	9	13	14	17	9	3	11	16	1	8	14	5	7	1	1	1
chr5	45695125	45696786	1662	564	517	528	358	322	376	393	797	1375	801	1106	463	730	567	1254	932	1045	786	1280
chr18	55892367	55892627	261	37	52	59	47	51	34	29	194	174	40	60	49	48	36	31	26	37	19	31
chr6	131791967	131792123	157	18	19	22	9	12	6	7	32	63	18	25	6	9	11	5	3	13	5	5
chr12	69786498	69786709	212	9	11	14	25	7	14	7	66	28	26	21	26	4	20	7	3	9	6	7
chr12	50297500	50298109	610	63	43	32	54	61	20	38	112	62	56	92	32	40	28	133	59	119	78	138
chr10	51589203	51589487	285	45	27	34	38	41	22	30	109	78	25	34	36	30	40	25	21	14	14	32
chr7	64712195	64713109	915	287	228	188	85	137	172	107	428	364	326	380	197	260	218	642	418	403	265	504
chr4	173967951	173968402	452	32	32	28	12	15	26	14	46	41	36	55	30	38	43	152	66	55	25	73
chr3	74663174	74664388	1215	265	211	126	158	135	145	124	438	374	338	413	153	262	163	608	414	356	324	400
chr8	62066202	62066364	163	29	11	13	2	15	7	4	7	11	12	7	5	9	12	44	22	44	9	38
chr10	94088700	94089125	426	23	10	34	29	39	25	21	75	78	27	33	39	17	30	16	21	10	12	17
chr7	47674653	47675326	674	123	132	117	104	137	93	95	276	238	189	312	137	166	170	369	222	260	192	278
chr3	117122979	117123211	233	13	14	22	3	10	12	13	52	44	6	30	3	7	27	7	4	7	1	8
chr5	132307697	132307954	258	21	8	14	7	10	4	6	28	62	17	9	4	10	6	9	4	2	4	2
chr21	10188898	10189081	184	9	11	13	6	6	9	7	25	32	26	10	8	5	17	9	6	1	2	6
chr13	20333937	20334332	396	32	18	23	25	44	11	14	76	25	19	27	14	14	23	14	10	10	4	17
chr2	75862069	75862412	344	24	13	19	8	16	8	11	62	134	14	33	6	8	18	7	5	10	2	10
chr11	4629029	4629848	820	586	576	574	383	336	307	339	681	1144	711	911	351	722	441	1224	771	1008	744	1260
chr12	101227094	101227242	149	10	17	23	26	18	14	10	32	28	14	18	5	13	25	12	7	4	7	8
chr8	17484430	17484851	422	50	23	30	43	31	28	37	60	78	37	90	49	53	43	175	75	72	59	87
chr14	29145723	29146031	309	27	31	46	26	31	11	15	44	119	36	26	31	18	22	23	19	14	8	10
chr10	50603415	50604078	664	39	26	32	24	43	10	29	72	86	74	59	35	40	45	106	70	107	42	88
chr4	156827657	156828369	713	53	102	117	53	92	98	37	146	244	100	115	82	40	107	34	48	52	30	67
chr6	103964065	103964243	179	12	9	17	13	20	5	21	28	33	23	16	17	23	22	9	4	13	4	11
chr3	181272142	181272410	269	22	48	44	26	40	5	11	54	77	21	22	37	13	39	6	5	17	1	23
chr10	44821527	44821679	153	14	10	9	8	18	9	11	9	20	12	18	16	22	14	31	30	44	22	30
chr6	37951720	37951985	266	8	7	11	18	10	7	7	38	25	11	11	8	1	10	6	4	5	1	4
chr11	109857097	109857296	200	11	7	18	9	23	7	14	26	40	3	6	4	5	6	7	1	3	1	6
chr5	133161306	133161752	447	77	40	46	73	93	43	79	128	60	71	238	116	109	106	353	168	178	147	216
chr2	220961718	220961850	133	9	17	15	3	24	4	6	11	14	8	9	10	16	24	7	5	4	1	3
chr11	79148416	79149069	654	112	72	89	93	74	67	80	166	231	184	222	88	107	70	331	126	190	153	257
chr11	125985072	125985333	262	47	26	29	19	33	23	28	42	33	33	62	22	62	39	158	46	75	59	70
chr7	113277002	113277466	465	58	69	57	54	92	42	57	126	163	51	97	63	45	86	47	35	53	30	54
chr21	34524487	34525187	701	58	39	51	31	40	14	34	96	40	62	114	67	42	67	185	72	119	57	146
chr2	137795889	137796372	484	25	14	29	12	26	17	25	25	22	27	41	26	58	42	129	69	56	40	63
chr5	121412445	121414120	1676	191	236	158	156	130	144	116	290	482	361	400	215	250	194	512	397	334	339	485
chr8	7544122	7544417	296	26	1	14	10	10	14	10	13	42	35	43	16	24	18	74	53	47	43	25
chr10	21976073	21976828	756	78	65	67	86	116	28	42	244	185	19	75	64	61	66	42	26	35	12	57
chr7	43737320	43737602	283	43	48	48	45	37	31	52	128	109	34	52	49	47	38	46	14	19	35	23
chr10	42970819	42971919	1101	159	110	204	117	123	71	118	237	264	224	321	146	173	179	463	191	247	200	467
chr1	201851815	201852176	362	31	49	38	39	62	18	21	103	198	21	39	16	16	20	24	14	22	4	13
chr10	88738337	88738564	228	15	10	22	10	15	10	6	35	82	18	15	13	11	14	6	9	8	3	8
chr6	56355823	56356323	501	80	65	65	57	74	48	40	186	189	92	62	61	66	69	52	44	57	31	46
chr9	18672666	18672898	233	18	19	22	16	27	9	11	69	25	20	9	6	10	11	7	6	7	3	11
chr8	70069324	70069633	310	26	13	15	16	12	12	9	23	32	14	32	13	32	38	80	40	55	21	44
chr8	117950287	117951082	796	196	175	163	100	116	118	111	287	243	262	362	178	191	127	481	257	300	216	394
chr1	70032830	70034401	1572	273	229	184	132	181	95	131	334	602	389	453	182	254	187	435	412	416	377	544
chr19	8878581	8878768	188	35	2	17	4	4	1	6	12	8	23	7	1	1	7	1	1	2	1	2
chr3	9811281	9812008	728	84	72	124	102	58	60	61	183	207	187	236	68	82	72	310	158	220	169	183
chr6	156119424	156119697	274	25	10	16	9	19	10	10	16	13	16	40	14	25	23	93	30	59	19	27
chr8	73699300	73699588	289	17	4	11	11	8	9	13	20	14	7	12	15	16	10	58	17	23	23	28
chr9	2473893	2474085	193	20	18	12	18	37	14	7	79	59	28	32	22	12	22	15	12	8	8	13
chr3	185927621	185928664	1044	297	214	172	187	166	187	166	377	395	249	526	286	352	310	914	352	458	388	519
chr7	65055102	65055512	411	32	9	22	16	22	6	11	12	22	31	19	10	10	27	10	10	2	1	11
chr2	99422622	99423293	672	88	70	75	60	130	65	79	166	136	169	196	101	102	149	315	155	195	127	264
chr1	217833585	217834497	913	120	145	128	106	130	73	86	295	340	96	141	112	109	189	87	96	76	47	109
chr18	21109488	21109893	406	20	20	32	31	17	4	13	59	98	15	32	14	15	19	19	9	7	6	11
chr2	72505249	72505437	189	15	21	10	7	22	10	7	36	51	6	22	20	9	14	15	4	8	1	6
chr3	62490068	62490284	217	14	9	17	11	26	13	20	65	12	13	17	18	13	15	11	6	5	2	12
chr1	65510157	65510507	351	23	15	15	16	22	5	15	40	2	21	15	31	34	30	99	38	74	29	76
chr4	54187379	54188056	678	64	103	69	59	97	65	91	238	219	75	93	82	57	76	53	48	52	50	54
chr12	98850395	98851179	785	192	157	183	126	107	127	140	335	367	232	457	159	257	127	602	291	348	289	356
chr15	60070098	60070287	190	13	10	6	8	9	3	8	27	17	15	6	13	3	14	4	3	5	1	6
chr5	102194478	102194929	452	51	56	57	66	85	45	34	285	209	44	102	61	61	63	42	14	41	34	52
chr4	185726458	185727234	777	207	158	162	89	126	138	104	308	324	209	301	230	169	198	481	205	435	198	455
chr8	248452	248982	531	55	30	36	12	31	18	22	33	49	38	40	15	36	21	106	62	74	40	49
chr18	48322951	48323911	961	195	138	218	101	139	110	143	326	606	154	256	134	133	184	109	112	156	67	99
chr1	66279731	66279954	224	13	12	15	7	16	5	15	18	21	31	37	12	22	20	66	35	30	13	62
chr3	127261151	127261865	715	188	169	126	142	137	133	101	387	122	296	306	202	277	219	643	237	525	349	405
chr1	67989991	67990269	279	11	6	10	9	8	10	12	11	24	11	25	6	15	10	51	10	18	27	39
chr2	121624863	121625427	565	61	32	28	42	39	21	39	113	99	88	101	53	61	69	147	97	86	101	116
chr7	43714053	43714725	673	95	122	169	88	105	59	106	257	532	142	180	81	73	115	57	111	60	37	63
chr16	33062678	33062834	157	17	8	24	1	6	1	7	9	17	15	12	9	3	10	3	4	2	2	3
chr21	44762922	44763471	550	109	56	81	29	58	50	44	90	90	109	192	82	102	76	231	140	216	114	136
chr1	94458456	94459054	599	59	37	33	37	31	31	19	86	37	47	92	42	66	31	164	66	90	63	112
chr5	127252588	127252797	210	11	17	9	5	8	10	10	15	29	3	12	7	7	11	5	9	1	1	2
chr10	44143705	44144832	1128	285	291	267	341	316	287	276	634	827	574	677	288	429	352	917	559	695	508	779
chr1	44759445	44759922	478	68	48	68	41	63	35	29	102	94	78	140	63	94	65	193	78	187	82	136
chr4	48683795	48684196	402	26	19	34	27	26	18	17	61	81	31	61	37	30	29	29	13	16	14	26
chr8	40500772	40501138	367	81	55	60	32	58	29	34	125	138	75	57	58	38	116	26	37	37	9	52
chr4	26728334	26728646	313	22	6	19	14	43	19	20	70	19	29	32	27	25	19	10	10	13	8	12
chr10	73038801	73039334	534	53	35	38	22	32	34	27	48	40	35	47	40	38	45	160	55	134	35	60
chr11	47488334	47489323	990	118	95	75	30	79	54	63	133	136	79	155	102	142	124	282	169	228	104	226
chr16	20878277	20878427	151	14	7	19	7	15	16	10	31	31	19	19	16	6	11	7	7	5	6	9
chr16	60173036	60173229	194	3	8	28	5	8	3	4	11	12	7	13	10	1	7	4	4	1	1	1
chr6	97284395	97285872	1478	506	551	389	377	403	393	384	932	1139	691	1103	465	656	520	1404	699	848	777	1291
chr5	10441276	10442496	1221	449	381	354	369	377	314	341	838	897	903	919	392	461	462	1160	745	762	580	1048
chr7	124190085	124190452	368	28	4	8	4	14	13	8	24	16	11	32	30	27	20	86	36	26	32	55
chr1	93983389	93983665	277	28	10	10	17	40	15	12	43	13	7	20	5	16	20	6	9	7	5	2
chr1	202200279	202200566	288	21	14	16	12	14	4	15	31	22	28	30	14	12	16	55	41	24	35	26
chr13	70544737	70545100	364	30	27	55	31	30	17	28	73	83	30	37	40	24	26	28	20	14	9	29
chr1	114423804	114424024	221	12	17	14	4	14	7	2	15	59	6	17	7	4	4	4	3	4	2	4
chr6	92980882	92981052	171	18	27	17	12	29	12	14	38	38	20	20	21	10	11	18	8	3	5	14
chr8	22280099	22280294	196	14	17	17	12	19	14	12	31	27	32	18	8	6	15	8	8	6	2	14
chr5	66530489	66530994	506	55	44	50	26	23	27	21	79	81	63	90	55	60	78	206	77	71	61	146
chr2	96315113	96315261	149	12	3	17	2	6	1	2	2	10	11	11	9	1	7	1	2	2	1	1
chr10	44069440	44070395	956	233	195	209	114	198	159	151	409	476	425	401	174	206	182	583	309	457	274	461
chr13	105848275	105848622	348	18	16	26	17	7	7	16	23	45	12	23	24	32	21	40	41	59	31	58
chr1	216879072	216879316	245	28	30	29	14	34	14	12	35	46	23	44	42	55	52	118	75	48	52	81
chr15	64011737	64011949	213	38	15	17	36	29	18	19	73	25	47	22	23	19	42	12	21	9	9	12
chr3	332118	332330	213	9	7	16	9	9	16	8	19	63	15	29	11	18	18	4	12	6	5	2
chr10	134587802	134588335	534	28	27	13	21	25	18	16	32	22	22	36	20	14	3	88	21	59	81	29
chr4	76097902	76098419	518	22	23	19	12	38	9	11	64	91	21	26	13	15	20	11	7	8	12	14
chr2	174869992	174870304	313	23	11	21	8	22	14	10	29	98	18	23	14	11	13	13	13	6	2	6
chr9	73539520	73540946	1427	169	127	211	135	209	109	129	400	413	175	200	164	111	182	189	68	123	103	127
chr21	45186805	45187141	337	54	33	47	32	49	22	16	54	58	51	86	61	29	52	124	54	150	68	75
chr1	100315091	100316223	1133	379	347	320	212	228	241	195	510	943	522	590	256	374	263	841	512	613	464	765
chr13	62100512	62101038	527	63	34	32	17	24	21	12	43	36	30	26	18	32	50	73	68	60	45	112
chr1	94899711	94900111	401	24	30	21	26	15	14	14	70	54	16	42	10	16	26	8	4	18	7	18
chr7	90234302	90234706	405	52	44	47	27	47	35	23	78	71	72	74	57	81	58	188	113	76	51	134
chr10	1199222	1199381	160	7	9	10	9	10	17	10	15	17	18	11	14	27	14	59	20	39	22	34
chr6	65673068	65673218	151	10	8	7	9	3	3	10	9	8	14	7	12	1	7	4	2	1	1	4
chr16	74657340	74657660	321	23	13	19	20	14	12	19	28	29	36	44	13	14	17	9	11	12	6	14
chr8	100256961	100257125	165	18	7	5	12	20	5	9	43	18	13	7	9	12	11	4	3	5	1	10
chr16	73769014	73769222	209	32	34	32	18	21	16	12	36	50	50	36	40	24	37	22	15	16	9	22
chr13	112669270	112669457	188	10	23	52	26	32	10	12	36	13	34	19	4	13	26	15	10	4	5	1
chr14	93159017	93159577	561	140	94	80	84	83	108	81	177	103	123	232	183	150	171	489	180	271	200	274
chr3	183532763	183533482	720	97	49	69	27	40	57	24	83	93	69	218	105	76	105	297	131	178	106	187
chr4	172733534	172735252	1719	176	187	143	144	140	113	142	283	314	276	429	193	235	191	583	278	254	235	603
chr16	52499803	52500079	277	8	14	18	22	33	8	11	40	15	13	38	11	11	7	5	4	10	4	9
chr6	12808170	12808509	340	27	43	37	25	46	16	33	130	54	26	46	42	17	58	25	19	21	17	13
chr10	32038905	32039561	657	55	25	41	18	30	22	21	69	108	75	85	23	41	34	170	65	89	52	74
chr5	139672224	139672537	314	17	11	20	11	28	9	13	42	52	19	43	15	19	15	10	11	10	8	13
chr10	14629004	14629167	164	21	28	34	18	21	26	13	49	79	37	26	16	20	32	16	20	10	12	13
chr5	115889059	115889420	362	82	49	61	13	34	32	31	41	45	72	67	45	80	75	210	87	96	80	168
chr3	98528335	98528580	246	21	8	13	7	8	4	8	12	16	7	11	17	5	16	42	20	33	13	26
chr20	35117121	35117575	455	27	16	33	28	37	23	17	101	59	45	46	14	18	41	28	16	14	16	7
chr2	48423322	48423827	506	33	13	19	9	34	22	17	27	15	24	18	17	15	20	79	28	68	16	84
chr3	122115362	122115543	182	11	23	15	14	7	8	2	23	15	20	17	13	8	19	12	2	7	2	5
chr12	3246532	3246676	145	11	16	21	10	10	1	9	20	28	13	27	7	2	20	37	20	47	23	34
chr4	146452276	146452671	396	27	15	20	16	18	18	21	28	25	23	40	43	55	27	106	66	60	27	79
chr5	95706477	95707165	689	37	28	29	20	41	28	22	59	69	33	87	65	50	27	240	57	52	70	78
chr8	38560927	38561227	301	11	9	9	11	12	9	17	35	37	8	26	14	22	25	71	29	30	23	42
chr5	124629440	124629670	231	17	15	12	3	18	6	12	26	17	14	21	22	16	20	55	18	29	32	41
chr4	176356475	176357003	529	67	36	39	54	39	54	68	71	39	43	125	65	161	87	521	102	115	159	161
chr2	178332513	178332712	200	28	12	21	26	31	11	28	40	56	11	45	25	14	17	12	8	13	11	15
chr11	95562686	95563041	356	34	42	53	45	87	21	7	129	95	31	33	15	21	51	24	18	14	10	21
chr5	111004365	111004794	430	42	58	36	42	55	38	24	147	112	39	60	64	27	103	34	22	18	22	46
chr1	118108269	118109044	776	170	108	80	107	112	66	76	152	71	125	256	166	243	161	595	170	297	205	445
chr7	143582087	143582664	578	120	130	96	95	95	79	96	242	140	219	316	100	148	119	407	176	236	204	294
chr12	9216765	9218182	1418	803	743	659	552	470	614	533	1079	1619	1073	1422	454	827	595	1882	1154	1229	1035	1605
chr5	167088728	167089035	308	10	18	11	9	25	14	15	25	21	16	17	22	25	14	56	35	35	51	24
chr8	90899840	90899988	149	21	18	20	15	32	8	10	39	30	14	24	11	8	18	10	16	5	4	5
chr3	4774731	4775119	389	31	36	21	24	21	10	20	51	26	48	52	31	36	38	84	60	46	44	95
chr2	193058998	193060480	1483	144	174	94	96	146	77	100	246	375	210	299	159	248	127	450	291	281	241	329
chr10	47653948	47654481	534	133	75	111	74	82	91	68	210	330	252	194	110	209	98	303	235	218	283	318
chr11	79838345	79838611	267	25	27	31	33	25	14	7	47	26	22	8	21	17	15	7	7	16	3	11
chr20	30920341	30920893	553	58	39	72	63	70	27	33	158	173	93	113	47	44	64	38	53	38	19	45
chr2	224498505	224498727	223	10	8	9	12	16	12	13	40	18	26	41	17	10	32	60	34	57	19	44
chr2	42846266	42846431	166	22	11	29	13	18	4	7	34	40	19	26	17	9	20	15	6	11	3	9
chr2	170674794	170675153	360	27	14	28	18	49	6	15	115	71	25	32	16	15	19	10	8	11	10	17
chr8	103740571	103741120	550	70	74	76	63	62	42	48	124	256	95	205	90	50	93	340	159	142	76	205
chr2	15044415	15044974	560	23	100	53	44	39	21	16	103	188	39	57	16	34	29	36	16	7	13	26
chr1	68140370	68140720	351	24	15	17	11	17	17	19	60	45	41	32	31	39	32	124	44	52	24	74
chr10	52336185	52336347	163	18	12	18	20	14	10	4	33	75	17	7	4	7	10	3	6	1	7	6
chr6	52226442	52227591	1150	195	228	174	216	203	138	164	512	562	451	513	192	184	237	559	376	469	349	575
chr2	121199644	121201093	1450	217	196	140	177	186	192	158	291	448	414	442	165	332	168	533	350	599	343	536
chr1	159823757	159825046	1290	421	382	330	271	262	254	210	644	791	667	568	283	296	270	726	560	713	420	1023
chr3	171815006	171815182	177	20	10	20	8	12	9	9	32	73	14	19	15	9	5	4	10	4	4	8
chr14	54802427	54802648	222	18	13	23	19	24	13	16	24	26	8	17	15	20	17	8	6	14	8	3
chr3	153680648	153681282	635	27	43	45	67	71	37	57	155	116	28	38	31	46	39	25	22	33	21	20
chr2	185180	185457	278	14	20	14	7	18	17	7	22	57	12	26	20	15	22	5	17	6	2	6
chr1	180451681	180451962	282	25	23	31	25	17	14	13	33	32	44	38	8	18	23	17	15	11	6	12
chr7	129511968	129512163	196	12	10	12	27	16	2	12	56	65	7	13	6	13	14	4	4	9	5	3
chr12	19241664	19242000	337	33	15	16	12	17	5	8	18	25	8	44	11	30	42	58	38	42	42	69
chr2	196841206	196841344	139	14	9	4	1	4	10	5	5	9	9	7	12	8	7	18	15	35	12	24
chr9	102439685	102440080	396	23	21	34	17	26	13	18	36	68	26	51	21	15	24	17	14	15	11	17
chr10	50828867	50829264	398	33	16	15	8	30	13	15	33	31	40	39	45	33	46	87	46	70	41	76
chr8	143125522	143125967	446	23	19	18	12	37	16	17	31	19	33	59	27	42	17	98	30	62	57	59
chr1	183810769	183810948	180	18	24	14	16	40	11	8	78	36	14	22	21	10	23	10	11	13	2	9
chr1	37706491	37706760	270	24	7	13	4	20	10	4	16	12	14	18	8	6	24	60	38	38	5	41
chr3	188061559	188062427	869	84	72	88	60	86	55	63	340	210	58	102	52	44	95	58	61	27	30	53
chr8	79332281	79332496	216	35	14	22	8	13	4	12	41	40	13	14	11	10	20	9	6	11	6	3
chr8	104152791	104153963	1173	110	101	108	78	122	66	70	265	222	223	225	104	95	105	263	204	177	165	302
chr6	82724798	82725066	269	54	39	52	48	66	43	44	189	127	29	70	44	31	36	36	31	28	20	34
chr7	90180348	90180801	454	28	38	22	18	21	29	35	22	51	30	58	49	24	41	105	47	130	42	71
chr2	210766698	210766953	256	18	21	35	34	47	21	29	34	35	18	25	20	14	30	16	8	15	11	14
chr5	108695494	108695679	186	20	15	11	10	14	7	12	23	5	23	25	14	12	17	9	6	3	1	12
chr4	77924147	77924349	203	11	4	7	5	4	1	2	3	9	9	7	6	10	12	32	9	20	9	19
chr15	37375173	37375359	187	10	9	2	39	25	11	14	28	10	11	18	9	18	20	13	1	1	2	8
chr9	7542805	7543058	254	37	10	17	21	19	20	11	20	27	18	13	12	11	18	64	37	56	29	31
chr10	82295349	82296348	1000	185	147	99	72	109	83	101	220	505	182	219	132	111	153	349	252	306	221	279
chr4	184319452	184320204	753	95	95	90	95	77	74	72	225	285	152	270	128	127	89	387	130	243	197	228
chr7	32545980	32546255	276	38	61	40	48	31	26	16	139	168	39	31	46	25	49	41	11	15	19	27
chr2	183832085	183832495	411	25	11	30	24	39	11	42	94	20	28	39	30	10	28	15	5	10	14	15
chr9	74377860	74378201	342	43	41	39	44	42	47	27	151	246	87	120	64	60	51	40	35	31	29	41
chr6	127706819	127707050	232	8	16	9	5	11	8	10	12	35	10	22	5	7	5	10	6	2	1	2
chr9	79328363	79328563	201	27	25	41	21	18	23	13	64	22	23	67	29	48	33	136	48	69	40	82
chr10	61907943	61908552	610	48	16	32	25	36	17	38	56	128	36	57	40	15	35	17	24	10	18	22
chr2	119997946	119998799	854	236	172	182	108	146	162	106	300	593	184	470	161	238	158	604	317	422	233	501
chr7	77441473	77442005	533	15	12	52	20	47	12	20	83	116	16	57	23	20	36	21	20	13	7	7
chr7	133247445	133247735	291	23	16	33	18	27	18	11	56	26	15	27	22	10	22	22	2	5	7	17
chr2	226358299	226359309	1011	107	101	154	124	128	51	101	269	484	135	176	125	86	139	111	106	71	43	84
chr11	101917809	101918641	833	208	231	171	129	115	119	117	233	224	272	301	212	218	164	537	265	285	293	435
chr7	96528417	96528698	282	10	17	11	16	42	17	16	44	33	22	21	24	16	27	13	8	11	1	17
chr6	138430580	138430747	168	45	39	57	45	43	20	38	89	131	73	76	36	33	67	50	31	31	22	35
chr2	97599265	97599874	610	26	18	18	18	26	10	13	33	24	38	35	30	19	29	107	24	41	39	52
chr7	143058536	143060089	1554	136	92	86	71	94	72	55	242	225	247	167	61	92	73	218	222	218	162	277
chr2	182979943	182980383	441	25	28	36	13	36	11	21	50	78	16	19	22	7	35	21	12	6	8	13
chr9	37760594	37761038	445	33	49	39	51	44	30	28	181	116	37	59	43	40	60	35	26	27	26	25
chr15	32870735	32871016	282	21	26	40	18	27	9	16	58	45	11	38	16	18	34	14	3	18	13	10
chr4	47505125	47505636	512	15	12	22	15	23	25	25	31	7	23	32	38	26	23	169	39	43	41	50
chr6	76574157	76574645	489	50	47	54	49	56	33	34	138	87	69	64	51	58	66	47	31	42	26	43
chr8	12261626	12261970	345	5	23	8	20	22	4	18	51	11	25	16	15	7	42	7	2	1	4	14
chr18	39272203	39272550	348	20	24	31	7	22	9	29	40	79	15	27	22	6	34	17	7	16	4	7
chr3	117286300	117286501	202	18	20	41	23	14	16	21	36	40	31	19	10	20	40	13	18	11	5	9
chr1	149513938	149514589	652	35	10	33	20	8	10	24	28	38	20	25	6	14	8	23	21	166	27	57
chr3	127680553	127681086	534	37	40	64	24	35	15	30	95	234	45	73	24	22	14	25	24	14	13	18
chr10	79561458	79561671	214	25	11	16	11	13	14	14	52	29	17	21	10	9	16	5	13	3	8	8
chr6	156601388	156601573	186	8	2	15	4	15	5	3	18	11	8	21	4	31	6	3	1	4	4	2
chr12	88429009	88430036	1028	685	619	581	465	372	437	451	1072	1249	869	1050	545	798	661	1282	861	1184	891	1517
chr8	89129691	89129848	158	22	23	13	13	33	23	7	38	68	8	37	29	18	16	21	6	7	6	13
chr6	71997767	71999294	1528	653	702	527	519	470	560	559	1349	1814	1241	1553	542	933	644	1744	1132	1510	1077	1868
chr4	169239087	169240113	1027	350	267	278	219	261	250	224	609	625	434	634	296	319	315	810	437	460	404	639
chr18	32676076	32676586	511	51	20	69	65	30	27	29	92	59	37	54	39	24	29	39	16	13	11	33
chr20	31030901	31031091	191	15	23	10	10	24	9	10	88	38	17	23	18	13	22	15	2	6	11	8
chr6	159075593	159075952	360	26	19	39	10	33	16	13	43	41	28	23	15	18	28	106	54	16	39	75
chr5	35617663	35618562	900	432	474	373	281	326	347	295	594	956	491	808	379	583	448	1098	604	757	609	1019
chr6	25556805	25557060	256	17	14	24	21	19	12	24	43	42	37	38	18	19	28	21	15	9	6	18
chr14	88495875	88496351	477	95	100	98	119	156	104	109	442	213	79	132	122	154	147	112	43	111	48	64
chr9	37984628	37985584	957	94	72	85	59	90	66	60	197	169	158	172	79	121	141	385	143	172	104	226
chr10	44101626	44102676	1051	125	135	132	118	111	92	82	193	367	196	269	113	171	105	352	221	251	176	318
chr6	125228883	125229245	363	22	24	20	12	37	9	13	56	93	19	24	9	22	20	15	11	11	4	14
chr14	48802386	48803008	623	57	91	53	27	58	38	40	59	157	32	33	73	60	58	21	29	27	25	31
chr13	40745060	40745440	381	49	45	62	27	51	19	32	126	391	21	86	37	20	38	35	19	21	12	23
chr21	29680679	29681274	596	76	33	71	46	42	40	46	105	223	40	87	84	59	66	31	48	23	34	33
chr13	76006996	76007499	504	80	68	105	55	103	31	81	184	144	87	108	77	38	115	75	54	50	39	39
chr2	196763242	196763807	566	44	26	22	28	30	20	28	47	41	47	66	55	66	56	170	110	57	65	65
chr4	89544309	89544653	345	38	20	36	36	29	13	29	123	150	21	37	17	19	24	14	17	14	14	16
chr4	79046987	79047381	395	35	18	18	19	24	23	13	23	49	31	40	30	14	19	110	38	57	23	50
chr5	94619431	94621172	1742	371	365	228	257	307	369	254	567	714	670	829	261	494	249	1040	734	651	680	811
chr8	92673881	92674710	830	84	58	63	39	63	37	38	123	109	60	133	86	74	99	224	104	98	86	201
chr18	25756459	25758484	2026	517	362	281	475	373	334	388	923	952	819	1075	318	634	567	1099	1033	974	619	1375
chr4	37519026	37519206	181	14	22	23	27	32	10	15	49	50	32	50	19	14	15	10	11	16	15	7
chr13	57876825	57878265	1441	90	108	119	67	71	75	111	138	127	88	113	131	117	145	686	257	111	112	209
chr3	35163499	35164083	585	67	59	85	63	71	31	93	111	85	25	86	94	48	65	18	34	30	12	63
chr7	28482279	28482787	509	18	29	28	29	21	27	13	107	71	15	18	17	22	41	23	9	7	4	22
chr12	16286189	16286595	407	20	10	32	12	15	6	13	58	142	19	39	20	10	11	15	8	10	4	7
chr6	144512198	144512376	179	6	11	5	14	3	4	6	3	4	4	5	4	6	5	1	2	2	1	1
chr6	53395120	53395574	455	28	11	29	13	23	9	12	29	123	13	47	16	18	19	11	17	8	6	3
chr12	69963126	69963413	288	18	16	43	36	50	16	22	113	83	24	37	30	20	34	23	15	8	15	22
chr9	28688789	28688926	138	7	2	11	2	12	4	12	13	26	11	11	8	14	3	7	4	1	1	3
chr8	27210997	27211258	262	10	16	11	16	11	18	10	18	35	25	33	39	40	24	115	33	53	46	38
chr6	6219072	6219230	159	31	20	19	14	27	13	7	27	52	13	19	14	16	19	19	7	9	4	11
chr1	180742566	180742819	254	14	17	26	7	23	8	16	32	64	18	21	8	6	6	6	5	5	5	13
chr11	30606015	30606385	371	77	104	53	56	48	62	57	109	146	94	106	59	128	77	270	135	118	116	200
chr1	118475365	118475538	174	25	17	35	13	19	14	21	54	147	27	37	15	23	35	13	9	15	7	23
chr15	73859060	73859228	169	12	11	11	12	20	12	13	42	19	8	16	14	4	14	4	4	10	6	4
chr12	44210131	44210326	196	22	21	47	17	14	8	9	58	46	25	22	3	17	11	6	14	4	4	10
chr7	44275604	44275970	367	29	12	24	10	20	7	12	50	27	41	37	21	19	26	66	41	83	17	49
chr5	104298749	104298977	229	10	11	15	12	29	4	7	12	19	19	13	5	10	15	4	1	8	4	7
chr6	7342480	7342966	487	47	38	45	16	39	35	19	62	62	60	79	72	94	88	194	112	109	79	122
chr6	116303413	116304014	602	62	176	148	166	145	119	95	332	401	71	186	93	91	109	95	50	90	69	65
chr5	8005596	8005774	179	19	4	6	3	8	10	4	12	12	6	7	4	7	20	55	44	14	5	20
chr7	86974338	86975373	1036	969	853	878	751	643	635	731	1516	1810	1186	1714	670	1072	852	2082	1153	1436	1290	2082
chr2	125651876	125652199	324	12	19	28	15	14	4	10	48	71	24	25	12	3	30	10	4	8	6	12
chr1	91316215	91317687	1473	381	370	375	275	245	223	200	567	890	527	603	192	276	244	778	487	588	462	944
chr2	182063687	182063868	182	13	7	11	5	9	6	6	11	20	4	23	3	4	8	5	2	6	1	2
chr6	134855661	134856196	536	36	29	40	20	30	18	19	44	241	13	44	11	21	41	21	12	15	1	16
chr4	56212099	56213275	1177	538	632	549	586	471	530	500	1004	1324	1215	1218	469	684	554	1531	991	1243	910	1527
chr4	133425732	133425888	157	12	20	11	9	22	19	23	22	37	13	14	13	18	17	11	6	3	2	17
chr6	130739293	130739564	272	21	17	21	20	27	29	19	53	21	22	29	24	12	20	16	3	5	20	4
chr7	130404464	130404727	264	32	28	30	25	30	11	28	139	76	34	50	33	17	30	13	26	22	7	13
chr8	40553964	40554447	484	28	18	50	22	67	9	48	100	48	47	40	37	17	47	25	17	17	10	23
chr21	9975526	9975684	159	18	13	16	6	15	6	6	18	30	11	3	1	9	4	5	4	4	2	2
chr4	37687405	37688828	1424	1389	1348	1232	1060	805	930	838	2090	2883	2677	2547	1069	1250	1258	2592	2099	2735	1980	3162
chr15	25642390	25642585	196	19	13	16	8	17	7	14	59	28	7	28	22	16	2	12	6	3	2	10
chr2	45812406	45812826	421	47	40	54	41	39	33	22	120	129	65	59	45	30	49	28	23	28	33	35
chr8	48100158	48101049	892	188	130	135	137	159	139	102	277	428	304	363	150	222	116	515	249	328	271	392
chr3	131173282	131173624	343	20	27	22	6	22	14	8	72	67	14	31	14	12	23	16	13	4	4	12
chr5	65891862	65892951	1090	347	285	331	262	326	247	279	701	988	657	689	262	473	253	938	598	653	584	803
chr17	26619993	26620195	203	11	5	18	1	6	3	6	8	42	9	6	2	1	6	1	1	2	1	4
chr8	9590267	9590428	162	14	23	19	22	20	4	7	40	32	17	6	7	16	14	8	6	11	2	5
chr6	141242456	141243042	587	135	98	116	76	115	77	90	270	331	111	186	95	79	150	121	68	92	55	103
chr3	138568233	138568423	191	11	16	21	25	12	13	6	39	40	11	11	10	10	13	6	7	12	4	2
chr12	16736995	16737311	317	22	17	25	4	16	8	23	23	116	17	34	14	6	15	6	9	10	1	10
chr13	76346046	76346466	421	61	48	85	44	52	30	58	138	220	58	107	68	30	40	51	47	28	16	43
chr4	164448209	164448505	297	14	10	17	8	31	8	14	47	32	11	21	10	7	27	14	1	7	6	9
chr4	154386823	154388854	2032	818	704	568	502	490	484	520	1428	1544	1460	1559	564	657	608	1547	1114	1406	1034	1891
chr4	116322650	116322913	264	18	15	19	5	25	8	23	22	39	19	18	9	12	15	14	11	1	3	9
chr5	133223771	133224245	475	25	17	16	18	27	6	27	33	33	16	24	25	25	31	104	54	39	11	85
chr5	10607318	10608023	706	43	24	32	26	24	22	26	51	44	34	60	40	47	43	116	52	64	40	88
chr4	176872883	176873624	742	107	96	157	82	137	108	118	325	934	144	265	147	108	135	90	96	89	63	83
chr4	100316119	100316588	470	24	21	32	5	15	17	18	30	87	14	22	20	22	15	19	9	4	7	12
chr9	115090047	115090632	586	42	27	42	72	89	30	42	147	76	80	40	48	55	66	34	17	28	22	49
chr12	54553031	54553201	171	34	8	21	11	11	10	10	21	41	22	34	14	31	21	69	43	33	44	29
chr2	107196375	107196676	302	19	14	16	11	25	13	20	44	22	9	38	33	47	34	136	39	51	40	55
chr3	37366401	37366658	258	10	5	13	9	6	9	9	15	78	8	23	8	2	1	3	2	1	1	8
chr3	73625972	73626837	866	109	91	123	119	145	66	101	294	404	122	157	90	104	139	111	64	116	50	83
chr3	123736540	123736758	219	7	11	15	2	2	5	9	22	34	12	14	14	10	14	6	1	4	4	7
chr11	90953410	90953936	527	42	46	75	39	71	36	40	193	153	48	76	61	43	64	29	25	40	34	46
chr5	163464874	163465712	839	58	34	56	52	113	41	95	111	54	56	86	100	46	117	57	31	32	18	46
chr2	127880040	127880532	493	48	30	29	11	43	18	22	42	30	62	52	29	62	62	119	50	103	50	137
chr4	77110301	77110528	228	45	31	43	29	48	15	38	109	56	39	62	30	27	63	31	25	11	23	28
chr4	119033758	119034140	383	21	25	34	26	23	17	18	40	82	27	32	35	17	32	18	19	17	8	18
chr10	78477011	78477179	169	12	20	33	22	39	15	9	58	47	25	21	25	10	10	14	9	11	2	16
chr10	65197340	65197804	465	57	46	48	57	65	26	40	105	95	84	73	53	36	65	34	38	33	35	40
chr17	39861640	39862155	516	51	22	22	24	14	10	8	60	72	54	43	18	16	24	16	12	19	4	16
chr12	64596158	64596292	135	5	6	5	3	15	3	3	7	8	7	14	15	3	3	6	1	1	1	1
chr19	30008263	30008414	152	10	3	6	4	8	2	11	7	11	7	9	1	7	25	6	2	1	1	1
chr9	4582874	4583494	621	85	68	78	64	70	62	46	183	81	102	104	125	154	144	279	126	271	156	222
chr8	95323173	95323583	411	39	57	52	20	31	31	31	125	83	48	39	26	33	45	32	29	22	12	27
chr1	227415552	227415770	219	20	19	21	17	29	10	8	71	45	21	20	10	5	19	9	4	10	10	10
chr3	163482807	163483033	227	5	8	16	9	8	8	13	16	13	9	19	15	20	15	60	38	11	27	23
chr3	87177258	87177468	211	20	34	36	21	39	17	20	57	64	24	31	38	14	59	17	8	19	14	23
chr21	29592903	29593273	371	38	12	65	40	45	9	20	84	71	38	86	27	24	39	20	26	18	10	20
chr9	19642171	19642653	483	47	26	46	17	35	18	15	54	51	38	53	54	39	50	142	59	63	36	109
chr11	14694146	14694599	454	19	19	25	30	40	20	6	125	62	24	27	6	28	29	24	5	13	7	10
chr7	33973567	33973761	195	40	29	49	23	31	10	21	69	148	29	31	25	13	21	25	14	19	8	13
chr5	149396591	149396763	173	15	6	16	8	9	6	13	54	27	7	18	16	18	20	12	2	6	4	9
chr15	79198294	79199030	737	42	37	21	26	42	27	20	196	165	38	53	24	30	26	28	19	18	7	28
chr10	132545527	132545746	220	7	11	14	7	22	8	15	13	18	18	34	13	10	13	62	26	44	17	21
chr7	73032834	73033321	488	63	35	53	40	66	55	48	120	49	81	158	108	146	95	315	90	234	134	195
chr5	16427689	16428178	490	32	28	17	6	19	17	8	37	24	24	50	45	33	27	73	55	41	62	63
chr13	26553327	26553875	549	68	60	69	64	87	44	58	184	175	147	103	63	55	102	47	70	50	25	63
chr8	81551185	81551612	428	41	32	18	22	30	18	20	49	67	41	35	31	26	26	108	57	37	44	62
chr6	77694232	77694707	476	38	40	41	51	72	17	33	94	77	39	47	50	30	70	20	17	31	21	37
chr4	165898355	165899199	845	133	131	63	62	78	81	77	104	94	141	207	103	181	107	374	170	255	174	243
chr5	159592061	159592953	893	67	69	61	60	66	68	57	93	188	119	107	71	103	82	345	139	132	92	138
chr8	2584847	2586128	1282	94	89	53	64	78	46	68	137	142	87	162	67	94	73	368	67	149	170	138
chr10	61882872	61883780	909	185	130	180	129	193	96	88	348	453	111	205	135	88	131	97	121	86	79	93
chr13	91570747	91571244	498	54	44	46	22	50	23	31	49	79	40	56	59	48	34	35	19	29	15	36
chr8	61916962	61917618	657	56	44	48	29	66	46	28	91	49	80	63	53	53	66	159	77	85	76	154
chr10	14596196	14597208	1013	126	182	144	159	146	104	119	382	494	166	209	107	115	165	115	101	120	93	104
chr4	6278885	6279156	272	29	24	22	30	31	25	24	62	20	80	60	42	50	52	170	38	122	49	109
chr4	1201748	1202299	552	45	23	40	47	47	14	19	49	37	46	71	46	38	38	118	74	95	49	72
chr8	72267535	72267884	350	7	7	15	11	10	10	10	27	9	6	12	13	20	15	34	19	18	76	18
chr2	11838202	11838708	507	68	30	28	17	17	4	36	35	26	14	23	6	35	18	164	36	191	35	22
chr1	101004555	101005747	1193	149	88	98	105	88	59	59	181	256	287	214	103	136	113	278	285	222	161	284
chr1	110661554	110661796	243	30	23	23	23	21	7	12	60	61	18	21	9	22	20	15	6	17	6	12
chr4	167240091	167240596	506	60	52	61	36	44	31	44	119	173	40	56	38	28	41	42	26	39	14	33
chr3	13256159	13256627	469	27	27	31	6	35	18	19	48	36	26	46	10	32	24	77	39	75	24	85
chr8	58429346	58429697	352	96	98	130	85	150	46	77	341	135	71	110	94	86	142	82	48	62	23	97
chr4	119186372	119187457	1086	313	235	296	269	192	264	227	529	860	479	714	327	482	248	1132	463	661	491	748
chr14	91841892	91842082	191	26	20	16	7	28	16	18	25	31	39	21	28	42	30	89	39	68	23	79
chr7	111737384	111737897	514	41	23	27	22	27	11	20	48	133	15	36	13	13	12	19	10	11	11	8
chr5	90837601	90837915	315	35	35	33	28	33	24	27	52	69	24	47	20	15	34	29	18	11	16	22
chr1	180049674	180050039	366	35	30	54	51	80	24	37	136	119	32	35	45	22	53	25	24	25	14	35
chr5	8888497	8888625	129	4	7	13	7	7	1	1	8	14	5	3	3	2	20	3	2	1	1	1
chr11	94286992	94287159	168	7	6	1	5	7	1	4	5	18	10	6	7	13	5	4	1	1	1	3
chr4	114305695	114306161	467	75	86	74	45	72	56	64	114	140	91	93	88	82	107	74	50	33	32	84
chr6	111654071	111654330	260	10	21	26	18	27	8	14	81	23	17	21	23	8	27	7	4	13	6	14
chr10	115679903	115680167	265	19	16	16	6	26	29	31	76	35	10	35	22	7	15	22	2	6	6	10
chr5	34411600	34412229	630	58	28	40	24	36	47	30	72	42	54	75	74	98	57	219	112	61	80	170
chr3	72323520	72324227	708	43	19	29	33	42	33	40	104	56	43	101	85	64	58	189	66	135	85	105
chr11	31439872	31440077	206	20	17	24	12	37	9	11	60	38	14	15	17	11	16	18	2	8	8	10
chr1	107599030	107600448	1419	511	465	362	325	330	305	300	701	1097	541	905	400	562	370	1022	707	661	598	1216
chr8	1296452	1296837	386	27	24	40	17	48	19	15	24	29	34	39	23	12	26	18	12	12	4	21
chr7	110569497	110570174	678	44	38	63	27	72	24	54	72	67	39	55	45	23	51	43	23	14	26	25
chr2	140124340	140125168	829	40	37	13	12	35	13	29	39	53	41	104	47	46	33	159	28	57	157	69
chr15	49571858	49572207	350	14	8	27	17	31	10	11	78	52	12	29	20	12	9	15	5	9	8	8
chr2	148801863	148802225	363	18	19	16	23	21	19	25	88	89	25	35	22	37	24	20	7	12	9	27
chr15	35849687	35850060	374	54	66	53	59	59	29	38	103	147	64	93	70	48	87	48	47	21	40	44
chr20	6937275	6937609	335	27	29	36	26	38	19	36	89	154	17	54	34	21	45	22	18	22	16	21
chr10	91011011	91011970	960	561	447	453	411	339	368	343	935	1169	760	990	463	631	482	1268	700	982	721	980
chr4	177985984	177986521	538	33	21	24	17	16	14	14	33	35	39	50	52	34	37	116	34	45	45	95
chr8	132925267	132925629	363	88	100	78	67	100	44	97	193	229	91	125	81	82	139	77	50	60	69	69
chr12	92518600	92518801	202	13	21	16	22	19	20	10	67	41	8	23	23	20	17	15	8	8	11	7
chr3	299709	300028	320	52	32	57	28	26	29	26	55	59	33	42	28	42	49	22	26	15	21	26
chr2	61590712	61591033	322	17	35	12	34	59	18	32	57	60	25	31	49	26	21	21	12	12	11	23
chr6	69344395	69345439	1045	283	316	183	244	179	245	259	390	720	442	562	204	445	230	730	527	604	474	763
chr20	7609041	7609153	113	8	4	6	10	16	2	6	19	23	7	8	18	8	5	4	3	6	1	3
chr7	17664707	17664939	233	18	30	28	16	40	12	26	89	94	19	35	21	16	40	21	15	16	4	20
chr10	66175832	66176123	292	18	21	24	12	18	14	8	29	66	19	15	19	13	14	11	7	13	7	9
chr2	160457224	160457711	488	60	31	47	67	47	28	40	163	181	38	90	52	57	86	62	28	25	11	52
chr19	54745672	54746099	428	39	14	21	8	23	19	6	23	24	26	19	10	2	16	12	6	11	1	3
chr14	31576073	31576374	302	20	19	25	32	32	6	11	84	69	28	33	19	14	17	16	17	13	6	8
chr2	102971967	102972927	961	178	166	116	131	143	146	106	283	395	271	317	144	210	136	432	266	308	266	342
chr5	122043468	122043823	356	19	33	33	28	35	13	17	68	150	14	49	28	20	30	21	18	14	13	11
chr20	6746171	6746337	167	27	15	29	43	32	14	27	44	70	43	58	31	41	44	31	19	10	11	30
chr7	132624419	132625166	748	134	104	152	110	247	54	136	457	241	103	202	157	87	143	106	53	83	85	99
chr10	90618212	90618643	432	26	10	24	11	24	13	8	37	114	11	26	3	6	15	9	10	5	1	8
chr20	25260488	25261133	646	66	38	52	56	45	44	41	67	77	81	98	41	94	40	285	65	98	72	152
chr2	133659679	133659874	196	16	11	5	14	10	9	5	8	13	7	12	7	8	18	7	1	5	5	1
chr4	114642059	114642517	459	24	27	31	21	42	19	25	47	29	20	64	26	19	21	21	8	15	14	20
chr12	57423225	57423551	327	14	12	11	1	7	8	14	9	13	12	10	15	12	13	59	9	35	17	28
chr2	96465124	96465385	262	13	14	13	1	19	2	8	13	31	12	10	2	2	11	4	4	3	1	4
chr12	64295180	64295584	405	65	58	70	24	48	48	42	70	187	51	81	52	51	67	36	35	30	30	48
chr7	99601326	99602141	816	175	172	132	138	108	130	143	249	151	191	454	252	254	184	766	188	440	356	390
chr5	159537950	159538099	150	9	10	18	13	10	5	5	46	45	11	14	10	27	13	10	5	4	4	9
chr3	149562520	149563080	561	46	37	47	32	51	28	39	133	47	32	67	39	26	39	35	14	23	24	31
chr18	77608617	77609310	694	82	26	64	29	54	26	60	80	44	79	96	74	105	105	237	112	131	108	172
chr11	27441912	27442085	174	27	35	21	20	29	9	19	60	115	17	52	18	26	16	20	15	14	10	13
chr8	49902945	49903119	175	8	4	21	4	9	8	7	10	8	15	12	11	4	25	7	5	2	1	3
chr10	69951930	69952151	222	24	21	16	16	20	16	12	78	59	26	19	32	17	32	18	12	6	12	16
chr7	1303132	1303469	338	22	8	11	7	18	12	8	18	15	21	31	17	18	11	59	20	38	14	47
chr3	85727756	85727946	191	14	19	23	8	21	13	14	36	48	11	18	18	4	17	8	1	13	3	13
chr6	17965551	17965986	436	35	27	37	36	55	20	44	86	69	27	41	23	16	30	42	8	13	15	22
chr13	80614661	80615279	619	220	211	244	202	266	144	177	635	846	196	241	144	171	270	147	171	135	107	180
chr10	81020729	81021535	807	98	104	84	113	95	58	59	210	122	119	277	117	175	144	421	126	269	207	254
chr2	76420243	76420701	459	88	104	81	59	83	35	61	142	219	52	77	58	58	92	34	52	60	29	48
chr4	82380425	82380789	365	39	21	21	10	40	23	39	48	28	37	62	67	44	46	153	47	105	70	79
chr1	186612682	186613200	519	23	45	32	32	36	15	24	56	72	24	52	31	15	39	18	24	12	12	25
chr4	82135524	82136952	1429	127	105	89	107	145	72	107	191	208	194	239	95	162	135	391	179	150	278	264
chr16	87889615	87890174	560	44	32	42	34	44	33	30	111	72	84	93	44	54	39	137	45	119	95	98
chr9	23821222	23821956	735	57	70	55	54	54	49	49	125	143	187	132	74	46	53	170	164	122	92	222
chr16	52494597	52494990	394	25	4	27	28	32	13	22	55	35	22	42	28	14	35	14	9	17	11	12
chr10	88812838	88813247	410	16	13	13	16	24	22	9	29	25	9	37	18	26	19	68	29	40	44	35
chr18	2417902	2418232	331	31	14	16	21	31	14	13	73	59	22	40	17	31	27	22	17	10	10	14
chr8	67068880	67069110	231	15	16	7	7	16	9	11	17	7	10	12	16	12	24	62	16	17	29	48
chr1	145728456	145728670	215	13	17	20	9	2	15	13	26	77	12	26	16	5	10	8	5	8	5	5
chr3	151152034	151152472	439	29	55	58	43	63	18	33	98	261	26	65	44	34	50	28	29	13	26	26
chr10	79115767	79115875	109	31	18	13	17	21	6	21	69	40	12	7	26	12	26	14	9	5	5	12
chr16	49046925	49047517	593	49	44	45	17	34	20	39	39	50	58	102	44	53	58	125	49	104	67	139
chr6	58338303	58338802	500	28	5	27	16	22	17	10	34	45	36	42	22	32	9	95	54	23	34	72
chr8	27247364	27247762	399	28	20	19	16	29	8	14	37	23	22	43	22	24	23	66	27	79	38	32
chr17	25865518	25865677	160	12	14	9	19	25	13	21	30	48	20	31	14	14	15	8	19	4	4	9
chr18	31753707	31754161	455	44	33	20	12	59	12	33	137	39	29	43	20	20	39	21	10	14	6	28
chr20	51592119	51592316	198	14	14	19	20	46	10	10	73	37	28	17	21	11	20	5	10	4	6	20
chr6	101256784	101257039	256	14	31	37	21	19	17	13	66	39	19	27	6	24	27	14	16	10	6	11
chr19	29327314	29327581	268	19	5	8	7	8	4	12	17	14	3	10	10	16	12	43	11	29	22	24
chr1	159750329	159751279	951	758	814	809	473	448	410	375	862	1519	1256	1038	462	664	417	1231	1223	1341	987	1668
chr12	26306171	26306925	755	165	166	265	151	175	87	115	460	1124	202	361	126	97	161	101	144	92	67	120
chr4	36742733	36743230	498	35	45	33	30	36	31	47	63	29	54	55	40	30	52	31	18	19	22	27
chr14	56105479	56105666	188	6	13	13	13	41	6	7	65	23	16	8	8	16	18	6	1	9	2	10
chr1	164614030	164614494	465	38	49	50	37	46	41	43	59	97	44	93	76	40	34	123	104	73	85	114
chr2	170785146	170785300	155	8	12	13	13	4	7	11	33	34	13	19	14	9	5	9	7	7	2	3
chr18	65182990	65184715	1726	1631	1661	1445	974	860	949	1022	2340	3266	2380	2893	1024	1574	1252	2894	2204	2722	2172	3461
chr6	91320427	91321407	981	101	68	81	114	48	66	57	110	167	159	186	66	138	59	341	189	142	102	297
chr4	125874269	125874939	671	50	34	52	38	31	26	38	77	50	46	86	30	33	47	34	29	17	19	37
chr1	121260633	121261698	1066	285	185	193	165	266	192	170	468	463	320	422	172	189	170	478	358	437	251	659
chr5	24112307	24113044	738	59	53	64	45	69	33	73	131	155	75	99	62	46	107	69	51	36	39	33
chr5	23605729	23605888	160	11	17	5	6	8	1	3	11	11	17	9	2	7	12	4	2	4	2	2
chr6	126110858	126113029	2172	725	646	606	786	537	540	671	1507	1647	1275	1683	655	869	734	1968	1156	1337	1148	1844
chr5	117528993	117529116	124	23	16	14	9	16	2	19	22	25	6	8	7	8	26	5	5	3	5	8
chr1	116947905	116948351	447	72	38	45	35	36	24	21	60	38	52	63	60	63	57	125	82	93	59	132
chr1	245397595	245398720	1126	146	128	113	72	165	77	86	179	124	169	282	148	123	119	348	213	225	151	340
chr15	28042863	28043363	501	42	27	18	8	35	6	14	23	22	31	50	34	66	45	84	48	96	64	97
chr4	13768528	13769192	665	40	21	40	10	16	20	22	44	41	37	51	27	33	39	166	60	52	24	56
chr2	216946027	216947236	1210	236	214	214	277	175	197	172	488	473	485	544	202	240	234	611	382	505	381	606
chr1	84092264	84093377	1114	142	98	103	67	140	102	73	154	112	139	245	144	211	169	418	187	203	198	458
chr10	91300362	91300581	220	39	36	29	25	41	29	28	92	66	41	66	35	36	57	39	32	21	20	19
chr18	77616325	77616984	660	50	21	28	20	40	14	28	37	46	36	50	40	46	46	151	39	94	34	81
chr11	78621232	78621535	304	17	5	26	11	10	6	6	13	17	13	11	23	18	10	74	29	15	18	44
chr5	175264289	175264587	299	15	8	9	10	5	5	1	9	14	6	14	18	13	14	35	22	25	8	41
chr4	152090342	152090710	369	34	34	22	20	57	14	24	69	26	23	47	38	38	28	93	70	58	47	93
chr18	5444194	5444704	511	27	25	47	59	49	28	38	162	110	25	66	33	37	56	30	28	32	14	21
chr4	68409556	68409867	312	70	84	56	71	94	55	58	184	154	59	99	53	41	77	52	30	36	50	62
chr7	97134342	97134474	133	6	3	4	4	3	2	4	5	7	7	7	20	4	3	1	1	1	1	3
chr9	76976431	76977006	576	81	102	114	84	79	42	66	288	505	75	113	77	58	91	68	54	78	24	42
chr8	54890981	54891415	435	78	87	114	73	89	69	30	297	250	40	76	62	54	67	54	40	46	29	54
chr6	138279956	138280367	412	18	23	10	14	6	12	13	25	17	12	40	17	14	31	90	19	50	45	21
chr2	159628858	159629165	308	15	6	5	8	12	10	6	9	18	15	25	17	6	12	52	18	26	13	28
chr2	196932911	196934027	1117	510	501	609	425	345	370	440	896	1093	707	818	328	594	456	1120	843	798	773	1089
chr2	175209794	175209993	200	16	17	15	9	7	6	7	26	63	14	32	13	10	29	10	15	3	2	4
chr2	63008047	63008201	155	13	14	7	21	30	6	11	42	21	27	17	20	5	26	9	1	7	8	11
chr20	13122200	13122576	377	24	6	17	6	19	2	17	26	26	18	32	23	25	20	101	46	24	21	36
chr1	72031062	72031308	247	21	12	9	12	8	2	8	15	12	8	11	10	27	7	52	20	16	28	37
chr17	80313698	80313945	248	24	7	20	12	14	11	11	4	14	39	11	4	4	4	3	7	3	1	4
chr11	24443364	24443615	252	26	19	16	27	24	12	14	31	88	36	39	31	22	23	6	4	22	18	7
chr11	33460139	33460284	146	4	4	5	9	10	15	4	5	13	7	13	3	4	4	5	1	2	2	1
chr4	68027080	68027333	254	18	14	6	13	15	18	9	36	22	24	56	31	31	38	147	39	22	42	64
chr11	35812739	35812911	173	15	10	12	5	14	10	10	22	24	11	18	9	4	20	53	26	22	14	27
chr6	54284617	54285056	440	17	27	31	13	23	10	17	35	180	30	25	23	12	28	8	12	17	4	13
chr2	174145211	174145422	212	6	7	2	7	24	2	3	7	8	3	12	5	4	7	2	2	3	1	1
chr2	202022245	202022677	433	46	21	40	47	56	20	19	148	104	49	43	29	20	50	24	23	22	13	31
chr1	116021829	116022281	453	30	32	49	8	26	14	25	41	90	40	51	25	30	25	96	60	55	50	64
chr8	54780670	54781033	364	29	26	34	23	19	6	11	54	79	21	7	15	20	23	12	12	14	4	9
chr7	98424230	98424890	661	70	23	23	27	46	21	23	84	54	48	74	34	76	53	168	81	84	52	105
chr4	154434913	154435404	492	21	19	29	14	31	20	23	45	129	19	43	7	23	16	21	11	3	7	19
chr5	108236473	108236691	219	14	36	26	19	28	12	40	59	46	18	50	30	23	21	22	6	17	12	18
chr2	15081482	15081815	334	25	20	22	10	22	20	9	28	31	17	54	11	28	23	83	43	38	26	49
chr13	24753096	24753298	203	49	50	59	40	59	31	21	99	102	18	76	23	42	27	18	16	28	29	19
chr10	42627563	42627823	261	43	15	37	11	45	9	20	24	33	29	28	5	5	21	19	5	3	5	13
chr1	67217911	67218489	579	64	39	42	36	27	34	19	64	126	79	102	35	51	55	134	88	109	51	121
chr4	98580363	98580667	305	14	3	12	8	11	2	12	14	17	14	15	8	10	34	8	4	1	4	6
chr3	10505595	10506157	563	19	17	12	7	29	14	15	28	8	21	60	14	15	30	95	44	46	22	49
chr21	15588151	15589476	1326	554	496	454	324	335	426	451	873	995	715	906	399	500	445	1189	782	845	572	1144
chr4	176635711	176636114	404	20	51	55	33	100	46	64	131	38	38	92	98	31	70	37	14	17	13	55
chr12	27519786	27520287	502	25	15	15	13	29	5	11	31	93	13	20	14	17	5	7	8	6	4	13
chr2	62442490	62442943	454	37	30	30	22	40	19	19	47	53	46	52	42	56	42	167	50	76	39	67
chr1	182838330	182838756	427	35	35	16	96	28	24	37	89	48	43	72	12	12	12	22	5	22	7	15
chr1	154550698	154550836	139	9	5	2	14	9	4	2	14	12	8	18	2	12	12	26	13	33	9	32
chr10	2975423	2975617	195	23	2	4	8	11	8	3	18	7	18	18	12	10	13	43	16	24	25	28
chr5	43154814	43155084	271	16	10	19	14	6	16	6	23	20	7	19	13	37	22	76	22	39	29	47
chr2	136773319	136773631	313	25	15	14	1	20	7	9	17	16	21	16	17	18	19	52	25	19	24	71
chr2	45176858	45177268	411	27	45	55	28	39	27	32	50	79	106	91	43	27	43	175	79	85	48	111
chr2	160353702	160354687	986	92	95	78	66	106	60	60	229	490	79	159	61	79	110	85	66	53	30	71
chr11	12784244	12784424	181	9	18	8	11	8	6	8	16	10	14	18	12	13	15	51	17	17	16	39
chr8	99613804	99614048	245	29	27	42	13	56	12	12	95	69	18	35	17	14	34	23	12	9	8	20
chr4	173055780	173056075	296	20	31	38	22	34	16	24	56	58	15	27	16	16	34	23	15	11	11	15
chr6	159495317	159495622	306	34	40	31	28	34	19	19	23	51	52	37	58	70	54	130	83	79	60	102
chr2	203645288	203645879	592	71	124	127	95	88	70	56	313	500	123	145	80	87	102	61	82	61	49	72
chr12	16063817	16065088	1272	429	330	306	309	284	305	292	674	898	673	872	293	498	313	1064	589	673	582	905
chr10	46057505	46058052	548	16	26	45	24	46	8	25	88	52	15	35	27	10	20	18	10	17	5	16
chr12	99288131	99289459	1329	194	190	126	150	151	129	173	493	203	379	364	196	258	171	545	349	366	337	487
chr7	153626684	153626888	205	23	10	17	7	14	6	10	30	7	15	10	21	5	18	6	7	4	3	7
chr12	104671205	104671696	492	49	48	70	55	43	29	26	86	181	46	34	42	38	35	35	18	21	27	37
chr10	17717671	17718023	353	38	36	74	57	59	20	51	137	82	44	41	29	31	48	31	17	39	9	35
chr3	85007612	85008680	1069	682	598	554	353	343	399	406	933	1217	682	1089	466	698	548	1225	808	930	834	1319
chr5	28864100	28864541	442	24	15	16	22	19	37	37	35	23	27	59	43	44	45	136	65	66	45	94
chr1	92195290	92195606	317	39	17	10	5	30	8	17	48	16	35	62	20	37	32	101	38	59	43	76
chr18	30491553	30491943	391	29	63	37	26	39	23	32	94	67	28	43	34	29	40	33	18	20	20	25
chr11	61403179	61403686	508	22	25	17	6	9	4	7	29	29	17	38	15	18	21	43	26	88	15	38
chr11	31877853	31878075	223	37	16	43	27	30	17	14	77	86	34	22	19	16	31	17	17	10	17	15
chr1	142873287	142873541	255	38	11	12	6	10	4	4	8	8	16	13	4	2	8	4	4	2	2	3
chr18	40219979	40220641	663	202	316	290	268	331	168	232	695	433	213	480	168	101	275	236	145	168	139	145
chr18	34990045	34990229	185	18	11	25	11	13	9	8	24	24	15	26	22	22	19	68	39	27	21	30
chr2	80277228	80277957	730	104	87	71	62	92	73	79	179	112	93	196	176	334	149	617	212	286	202	340
chr6	149657145	149657726	582	50	44	65	32	49	23	39	110	128	39	89	39	27	21	39	31	24	10	37
chr4	120444570	120444722	153	13	7	14	21	31	6	13	33	18	14	14	17	5	18	9	2	9	5	8
chr2	96191932	96193098	1167	146	137	145	120	137	123	107	244	391	253	269	115	156	128	401	195	261	244	303
chr7	48346395	48346853	459	33	29	35	36	43	8	19	36	79	30	19	21	29	44	21	13	16	10	22
chr1	86969010	86969899	890	276	226	170	216	166	181	173	402	233	342	455	292	299	305	617	366	509	319	714
chr4	102252316	102252567	252	16	15	14	21	18	8	9	31	69	9	20	18	16	16	16	14	2	3	6
chr1	186684862	186685535	674	81	63	75	80	62	49	58	101	81	43	61	72	40	96	33	44	30	19	61
chr2	218783522	218783925	404	56	24	45	11	47	34	29	123	58	58	106	39	52	46	131	69	95	65	150
chr6	128853893	128854276	384	35	29	38	41	73	21	29	123	68	33	31	25	18	37	27	21	20	11	24
chr3	133593112	133593379	268	7	12	9	13	15	5	6	28	23	9	16	13	9	17	10	6	5	4	4
chr15	99385893	99386312	420	17	9	22	8	27	10	2	46	47	24	23	20	16	20	13	8	13	4	7
chr12	132952051	132952283	233	16	3	5	7	31	4	5	6	12	5	8	4	5	10	3	1	1	1	6
chr13	23488861	23490395	1535	159	180	137	145	144	147	153	204	253	241	292	174	210	153	466	260	336	208	387
chr2	51230774	51231120	347	66	36	38	46	49	14	53	169	97	46	65	38	28	73	45	22	23	17	42
chr4	129678859	129679238	380	42	20	27	11	27	27	16	32	40	41	77	50	49	52	127	54	90	31	128
chr2	129039744	129040838	1095	110	96	120	124	144	135	103	327	165	196	254	131	145	156	497	156	325	179	353
chr12	12102696	12103516	821	40	50	42	50	56	35	29	55	73	57	76	37	48	38	165	49	97	50	128
chr3	52895042	52895276	235	28	5	19	10	26	6	5	17	9	18	15	6	6	19	5	9	1	2	6
chr7	11349856	11350010	155	8	7	4	2	4	1	7	6	12	8	6	6	12	14	3	3	1	1	3
chr14	23137635	23137856	222	11	11	16	18	19	7	13	18	58	19	20	21	7	15	4	6	14	1	11
chr6	25115675	25115937	263	6	15	11	13	13	8	9	21	19	8	38	14	20	24	64	12	40	48	24
chr4	29698537	29698858	322	15	18	45	19	28	7	23	33	39	18	19	37	26	42	11	10	17	12	7
chr11	16261292	16261726	435	44	35	38	45	54	20	29	101	75	45	59	31	24	25	39	16	26	18	30
chr6	132317148	132317635	488	43	57	38	32	29	36	30	102	204	36	72	34	42	29	41	25	27	22	15
chr3	124951123	124951379	257	24	11	20	9	12	18	9	23	24	14	18	10	12	23	8	8	7	4	12
chr18	59029620	59030182	563	34	40	50	25	43	11	26	81	115	36	28	24	32	26	23	23	22	8	23
chr11	2799548	2800801	1254	221	196	199	173	206	123	163	413	367	326	380	196	216	165	573	294	388	259	333
chr4	52903944	52905371	1428	238	227	177	196	204	145	168	475	547	424	545	224	211	258	563	427	395	278	621
chr3	77737698	77737842	145	6	4	14	5	1	2	2	7	6	13	12	3	3	23	3	2	1	1	2
chr2	186969836	186970036	201	5	4	17	5	10	3	4	13	53	11	14	10	6	7	6	4	2	2	4
chr5	112403306	112403981	676	74	48	47	38	97	49	46	129	60	73	144	108	118	69	289	99	148	113	209
chr4	63208206	63208395	190	11	26	15	18	25	20	27	55	43	18	32	28	24	28	15	7	11	10	24
chr10	14447649	14448130	482	37	16	19	4	13	22	14	15	18	61	26	36	51	39	135	36	58	57	112
chr3	176783935	176784110	176	23	32	42	24	49	10	25	76	43	24	30	18	17	36	12	15	16	6	26
chr2	200715258	200716283	1026	466	308	291	262	216	236	214	421	881	539	662	272	405	332	841	578	727	361	835
chr5	142692538	142692764	227	15	4	13	9	37	6	10	44	31	22	19	10	5	10	5	1	9	4	10
chr12	105411906	105412051	146	9	13	28	16	15	7	7	26	47	19	10	9	4	25	7	3	9	6	7
chr4	169019085	169019868	784	117	197	211	142	206	118	177	290	560	178	307	216	130	236	176	168	105	96	113
chr16	4264009	4264449	441	33	24	27	21	24	17	8	32	76	33	22	13	6	18	16	11	12	8	10
chr10	2960153	2960431	279	14	7	10	4	14	9	5	16	10	19	23	8	13	32	93	19	34	24	13
chr7	16834729	16834917	189	19	13	14	6	15	14	6	13	14	15	40	16	13	24	51	22	36	28	38
chr10	6253582	6253989	408	13	17	17	11	25	9	9	29	13	27	18	11	31	14	68	28	33	36	33
chr5	107081579	107081931	353	30	11	26	9	24	11	10	17	25	28	39	34	33	36	115	53	38	24	60
chr3	81809949	81811119	1171	1113	982	945	917	765	783	863	1983	2509	1775	2043	944	1184	1093	2394	1619	1771	1434	2483
chr1	49260538	49260881	344	36	23	24	26	30	18	20	41	58	24	27	29	13	42	9	22	17	8	17
chr4	190982796	190982987	192	34	30	20	8	15	6	10	11	34	23	15	12	10	13	11	5	6	4	11
chr11	30038341	30039126	786	59	82	39	48	43	36	35	129	190	109	119	39	54	54	150	138	126	66	193
chr2	197533995	197534373	379	26	20	18	6	23	18	15	16	27	23	31	10	25	29	96	30	39	32	37
chr18	12606761	12607581	821	146	96	183	143	181	73	165	353	343	149	251	145	138	165	152	91	110	94	143
chr2	191980271	191980723	453	15	26	28	17	14	9	14	27	88	11	13	16	14	25	15	2	10	9	9
chr10	29607148	29607853	706	66	47	59	38	38	58	52	55	97	107	149	73	130	77	259	131	150	136	118
chr20	53351753	53352058	306	17	29	21	21	22	6	20	56	39	15	6	28	19	18	7	9	8	9	13
chr18	34408214	34409637	1424	842	761	675	670	563	568	739	1419	1812	1566	1551	658	786	620	1807	1305	1506	1111	1867
chr17	26384767	26385324	558	37	43	58	65	60	25	38	94	131	36	49	58	34	28	47	31	25	20	20
chr3	4344774	4345873	1100	405	415	329	305	311	284	272	828	1261	610	880	328	487	308	1173	684	723	487	1098
chr2	127782245	127783590	1346	355	424	326	351	304	285	264	727	579	494	724	436	544	476	1195	485	815	586	823
chr18	36631123	36631437	315	22	38	41	25	60	24	38	106	125	31	61	51	29	57	32	31	20	23	20
chr18	35030412	35030924	513	89	74	56	57	56	65	55	125	86	120	274	102	232	117	432	200	195	167	262
chr2	199893534	199894020	487	40	19	30	14	21	10	20	15	32	30	46	13	24	24	60	33	61	29	72
chr4	31615474	31616330	857	70	61	45	18	52	50	40	56	63	74	88	34	59	70	221	114	116	33	152
chr5	6568586	6568823	238	28	15	18	4	15	14	11	14	13	24	11	30	12	32	64	40	36	45	34
chr1	224007596	224007836	241	9	5	17	3	12	8	13	19	77	9	25	3	3	15	8	6	1	1	5
chr16	87193687	87194178	492	33	10	27	11	25	10	11	34	16	30	51	9	17	16	110	14	69	17	67
chr16	8946585	8946943	359	23	9	16	10	19	14	7	55	73	17	14	14	8	12	13	14	5	1	3
chr6	152114627	152114758	132	4	12	16	6	21	3	8	8	7	11	10	17	4	21	9	2	1	3	3
chr7	51825714	51826051	338	19	4	16	1	14	4	5	5	19	24	38	8	6	19	6	1	1	5	6
chr6	123814218	123814411	194	12	15	17	7	18	2	7	10	17	8	20	9	10	7	8	2	4	7	1
chr3	139653444	139655081	1638	314	359	203	394	295	267	296	741	587	629	700	256	372	301	981	507	611	748	766
chr11	61300655	61301391	737	169	135	120	139	153	108	72	244	141	218	365	158	216	227	413	191	436	313	354
chr1	210028824	210029206	383	27	9	18	15	8	2	9	44	20	24	35	14	24	25	74	34	58	21	32
chr10	98617637	98617986	350	16	9	14	18	21	9	6	22	13	21	34	20	7	13	8	5	8	3	12
chr10	82173917	82174535	619	37	51	46	37	44	37	33	67	57	44	93	55	68	37	174	65	84	74	98
chr1	169132408	169132603	196	18	46	41	6	29	11	9	88	47	39	37	37	16	18	27	5	9	11	13
chr21	30448117	30448317	201	118	86	121	83	128	85	98	288	362	95	148	121	50	141	69	88	83	51	75
chr6	122714787	122714948	162	18	34	19	11	27	10	11	61	50	17	13	9	9	26	6	12	8	8	9
chr7	64466605	64467544	940	381	384	358	271	239	270	232	668	962	505	634	371	457	440	939	539	663	519	799
chr8	101839190	101839467	278	14	15	26	11	9	4	9	22	92	28	27	10	6	11	9	8	7	5	5
chr17	8392251	8392568	318	26	28	17	29	24	17	15	84	93	29	21	14	16	16	12	8	13	12	19
chr3	37304191	37304721	531	48	44	56	54	59	27	24	147	150	58	67	28	47	45	31	29	27	34	35
chr2	192109112	192109256	145	34	31	42	51	73	16	30	128	78	21	44	27	24	20	19	21	15	14	27
chr15	78574866	78575060	195	12	3	5	5	11	3	11	43	22	7	8	1	4	6	5	3	1	3	1
chr1	181171631	181172212	582	41	35	26	14	27	28	25	49	28	32	57	46	59	44	153	60	61	66	68
chr6	111455385	111456138	754	24	30	35	19	21	18	17	57	131	33	65	18	12	15	22	19	17	4	11
chr15	43218979	43219305	327	28	29	35	21	35	18	9	43	52	39	57	29	34	31	26	14	18	17	21
chr8	29490861	29491117	257	25	19	21	15	8	5	6	11	72	27	19	20	16	20	16	10	6	4	4
chr18	39222804	39223048	245	26	19	17	13	18	11	15	57	60	27	30	18	12	41	17	17	7	10	12
chr7	48031276	48031981	706	216	148	179	132	155	132	123	370	453	241	412	171	286	203	628	273	328	265	395
chr7	26998438	26998765	328	28	47	50	35	38	14	15	28	171	31	17	36	19	56	21	13	24	7	15
chr3	149304744	149305003	260	27	22	26	18	51	14	20	34	102	41	39	17	9	29	9	16	11	7	25
chr7	81776861	81777091	231	29	22	34	27	41	7	19	97	48	9	35	15	18	34	18	8	10	14	15
chr1	17085518	17085841	324	26	18	14	12	37	4	19	22	59	52	21	17	5	21	14	10	6	5	12
chr4	46474937	46475312	376	8	12	18	18	25	10	14	50	32	21	51	28	20	31	22	8	11	7	12
chr21	29628570	29629215	646	169	88	210	125	111	87	169	313	606	128	383	171	176	168	171	100	93	105	87
chr4	159859734	159860063	330	34	13	21	8	22	9	15	37	23	39	25	21	10	39	59	38	32	41	69
chr5	119509774	119510051	278	19	9	19	14	49	13	4	19	24	36	20	8	7	19	13	2	6	5	10
chr7	150435865	150436087	223	9	20	18	7	19	12	11	24	76	16	22	7	7	19	4	13	6	1	9
chr18	2036092	2036598	507	38	31	72	43	61	44	47	151	175	48	108	84	40	94	40	46	45	15	41
chr4	88243395	88244201	807	51	16	20	16	25	14	19	39	36	27	39	15	12	11	94	47	19	21	116
chr2	113862700	113862992	293	24	30	25	32	39	10	17	38	53	38	26	29	20	37	15	16	20	6	22
chr2	97899304	97899486	183	11	4	2	4	2	3	8	20	26	2	14	2	6	8	4	2	1	1	3
chr14	62193104	62193326	223	29	12	8	19	39	28	21	105	23	28	38	44	14	21	20	12	11	7	13
chr3	58405753	58406235	483	20	28	18	50	57	24	21	75	102	29	42	18	38	45	20	18	16	18	22
chr13	35293405	35293865	461	50	35	47	48	65	18	46	101	142	28	50	36	28	56	40	14	36	22	25
chr5	118323594	118324738	1145	1044	985	966	782	703	796	780	1605	2209	1498	2041	772	1222	998	2270	1503	1619	1551	2138
chr1	16891522	16892209	688	90	47	149	32	47	25	66	95	106	82	86	30	14	125	39	35	31	17	31
chr1	112346819	112347112	294	17	6	16	9	16	7	13	12	17	15	21	9	21	15	52	14	36	31	23
chr21	43735364	43735723	360	37	14	14	14	25	18	8	36	26	24	58	31	34	34	102	45	64	37	41
chr5	1385723	1386962	1240	205	230	235	208	203	144	166	504	468	360	455	195	189	197	615	277	466	300	441
chr12	117480232	117480401	170	13	15	21	10	8	5	4	21	81	13	18	12	4	16	8	5	5	3	8
chr1	208698828	208699204	377	17	14	25	14	38	24	15	74	78	46	48	27	5	30	17	17	11	9	16
chr10	58768381	58768930	550	54	30	23	10	16	16	18	25	36	16	51	29	67	26	144	82	28	55	81
chr3	127570756	127571141	386	28	20	23	16	32	21	22	35	22	23	40	34	29	28	99	28	50	40	68
chr4	186676105	186676452	348	32	21	46	12	31	14	21	53	171	35	44	24	14	38	9	18	22	8	17
chr6	138555637	138555804	168	19	20	19	11	19	9	14	44	136	17	42	12	18	10	13	10	5	6	15
chr3	186544706	186545683	978	210	183	184	177	141	175	133	445	524	476	430	173	170	173	506	378	510	275	503
chr11	23380743	23381367	625	107	100	127	100	91	98	118	170	457	105	164	151	125	126	67	75	101	76	70
chr15	85567688	85568310	623	43	49	44	21	58	33	18	152	126	59	75	43	28	56	30	26	43	20	20
chr6	93472710	93473111	402	26	34	21	15	19	16	21	43	101	22	23	20	13	33	7	18	17	7	12
chr15	101469853	101470304	452	25	14	27	14	41	19	14	21	28	21	31	21	18	21	73	30	60	26	54
chr11	87748269	87748932	664	67	63	95	64	92	53	45	167	300	70	153	86	104	92	103	64	54	34	37
chr15	91001434	91001733	300	11	10	18	31	17	18	2	54	37	18	7	15	11	10	5	1	12	1	10
chr8	61766394	61766922	529	82	73	69	64	94	40	57	244	104	40	130	56	51	81	52	39	24	15	85
chr13	66953116	66953366	251	17	7	12	6	8	4	9	5	16	11	19	8	12	22	37	9	22	19	55
chr4	2365063	2365438	376	44	39	31	11	28	23	26	86	99	41	70	36	22	60	138	44	85	77	71
chr9	110880158	110880424	267	16	3	8	2	14	2	5	6	16	12	19	20	31	6	85	17	18	31	31
chr6	82242886	82243089	204	20	22	22	4	37	15	27	64	58	16	21	14	19	35	11	11	18	5	11
chr16	85383853	85384068	216	18	8	8	10	8	4	3	34	46	11	26	2	10	7	8	6	3	1	5
chr12	9066352	9067840	1489	472	499	377	374	338	323	321	994	840	913	824	425	512	473	1087	667	874	672	1099
chr1	70756125	70756275	151	6	27	11	5	10	8	1	16	23	3	7	9	5	8	3	4	4	1	3
chr2	183924252	183924666	415	56	41	52	37	34	28	43	101	116	53	55	42	43	49	43	39	21	29	31
chr1	249157131	249157933	803	234	215	201	193	146	146	101	383	390	347	332	177	214	167	452	311	402	250	493
chr5	97974330	97974772	443	17	23	32	20	35	20	47	55	103	35	55	56	26	33	22	26	22	11	17
chr8	33900486	33900974	489	26	25	24	23	34	14	27	90	86	13	48	13	20	35	12	18	20	7	17
chr10	57390714	57391491	778	324	307	197	145	196	197	224	448	687	363	540	218	442	223	638	420	542	478	724
chr11	94245205	94246049	845	150	152	122	110	117	104	107	240	289	305	298	139	209	142	358	229	298	227	369
chr7	51253072	51253562	491	49	24	26	15	28	18	26	50	33	58	30	29	52	47	118	70	75	49	55
chr7	108887538	108887662	125	6	6	5	1	13	2	7	9	9	9	12	12	8	19	2	2	4	3	3
chr4	75023066	75024590	1525	831	593	736	561	466	529	495	1273	1670	1188	1230	559	760	646	1594	943	1234	961	1695
chr4	103996607	103998200	1594	396	350	328	316	308	315	340	825	882	659	835	381	456	392	1028	600	657	528	960
chr3	190231237	190232891	1655	729	576	670	540	498	453	471	1171	1697	1061	1526	534	923	627	1600	1040	1110	1060	1613
chr7	113943048	113943257	210	29	25	28	36	47	14	21	110	63	21	24	12	30	46	12	17	14	13	21
chr2	230507203	230507627	425	37	28	67	21	31	14	20	54	223	25	61	10	21	13	24	15	12	10	13
chr18	59304536	59304768	233	27	15	24	27	24	24	16	30	40	30	39	24	63	27	133	35	74	58	43
chr10	100164102	100164393	292	12	20	12	24	16	7	3	54	34	10	11	10	13	15	8	4	9	3	9
chr2	197071633	197071830	198	9	5	12	6	6	12	6	11	8	7	19	24	20	18	66	19	21	21	37
chr5	61608804	61609077	274	18	21	21	15	14	6	16	32	45	15	28	12	8	17	14	5	9	9	11
chr2	98583034	98583790	757	91	109	134	127	111	54	48	255	286	65	93	47	46	92	54	46	68	28	68
chr3	26088119	26088417	299	14	12	12	4	13	1	11	7	16	31	12	7	3	19	6	1	4	2	7
chr3	168707282	168707409	128	11	17	21	3	18	9	7	23	20	9	27	24	21	14	6	10	5	3	10
chr2	74453824	74454165	342	36	28	40	6	22	10	12	38	75	29	45	12	25	37	81	54	76	22	75
chr2	191492377	191493257	881	123	69	54	51	94	42	46	124	90	127	159	92	103	82	299	111	139	100	226
chr11	76076047	76076608	562	45	29	22	12	11	8	9	26	127	13	33	8	6	19	14	12	6	1	6
chr6	57615937	57616149	213	22	9	14	7	29	11	19	7	19	15	18	12	12	28	8	11	1	1	10
chr20	12534998	12535570	573	37	63	50	32	43	22	47	117	55	61	48	51	39	38	24	32	23	19	39
chr4	48018219	48019581	1363	699	701	617	406	448	484	488	1359	1474	1142	1219	519	642	585	1370	911	1079	1230	1448
chr11	27239456	27239872	417	45	49	39	15	34	18	42	78	84	39	41	42	38	39	171	59	103	35	75
chr6	21885630	21886195	566	60	36	49	20	46	38	65	97	56	93	130	95	134	94	321	108	157	147	124
chr7	134895766	134896855	1090	684	668	538	542	481	511	561	1216	1299	1359	1247	524	711	690	1619	980	1222	1076	1408
chr8	24852228	24852389	162	21	35	19	21	22	11	24	58	32	18	18	10	6	23	12	9	10	4	16
chr1	72555002	72555271	270	34	25	38	25	40	23	17	31	28	27	27	37	11	52	19	17	4	8	23
chr8	11274158	11274717	560	42	33	45	16	41	41	27	93	63	34	95	42	58	68	268	43	81	71	103
chr19	12862899	12863075	177	18	5	25	9	11	1	2	7	12	17	4	2	5	10	2	4	3	1	2
chr12	63062506	63062919	414	55	23	49	13	37	24	17	40	43	94	70	52	65	82	157	111	69	67	149
chr10	23509332	23509594	263	14	4	12	4	15	2	1	15	37	14	23	4	1	16	1	2	4	1	7
chr12	92758399	92758688	290	27	3	1	1	12	7	12	11	8	21	20	13	19	18	66	45	20	24	30
chr4	122790883	122792010	1128	986	956	832	710	632	834	657	1764	1831	1415	1709	941	1332	934	2249	1430	1694	1487	2166
chr6	88875349	88877094	1746	165	208	142	156	190	121	154	322	505	458	408	141	180	153	488	363	326	324	495
chr17	4118763	4119086	324	26	26	27	11	28	11	20	69	46	61	46	25	23	39	33	14	10	2	25
chr8	96908298	96908458	161	7	7	5	1	15	1	7	7	3	9	14	6	6	5	24	8	17	30	11
chr18	12033218	12033415	198	25	11	16	23	21	8	11	33	48	22	25	15	12	28	8	17	9	10	3
chr12	40732020	40732233	214	12	12	25	10	14	9	22	27	26	12	52	40	15	27	10	11	6	10	9
chr6	139292013	139292589	577	125	113	76	64	96	40	65	235	345	98	172	46	57	123	61	61	53	37	87
chr10	92770846	92770960	115	18	21	16	10	17	16	11	13	37	19	19	29	11	11	13	6	8	8	8
chr15	69192456	69192665	210	27	13	18	5	10	7	14	15	25	7	19	4	1	6	4	7	5	2	2
chr4	154789313	154789501	189	10	4	6	3	15	1	14	7	7	8	7	10	2	21	3	1	4	1	3
chr13	75991616	75992347	732	68	56	78	37	87	42	69	200	191	56	114	48	37	73	63	53	28	32	47
chr9	132546165	132546475	311	29	15	25	24	16	27	16	25	52	26	33	16	20	19	21	19	10	5	10
chr12	85200936	85201308	373	21	36	28	32	26	18	23	47	73	14	27	26	8	24	15	21	4	4	19
chr1	70622156	70622575	420	19	24	39	38	41	13	14	67	172	23	26	33	20	33	20	23	10	10	14
chr5	111055572	111055905	334	13	10	22	6	12	1	5	30	22	8	31	7	11	9	70	27	18	12	32
chr6	74008904	74009720	817	57	39	33	25	56	20	26	63	76	72	81	37	55	35	132	62	97	47	100
chr14	89007743	89007982	240	26	14	21	22	13	9	13	28	50	16	9	11	27	41	10	12	5	2	16
chr3	139101244	139101680	437	32	14	40	20	36	14	16	65	84	20	26	17	13	22	15	14	12	12	16
chr12	95566377	95566682	306	17	9	43	8	15	18	13	42	157	43	28	18	19	10	10	17	3	6	10
chr18	68712973	68713449	477	25	33	34	35	43	17	17	36	64	25	27	18	29	27	25	12	20	11	17
chr2	169479211	169479550	340	16	12	20	14	11	13	16	21	73	26	22	15	14	21	21	6	8	6	10
chr10	52897645	52898256	612	35	36	62	43	40	27	42	96	183	54	55	39	34	41	48	32	24	17	33
chr5	34929183	34930440	1258	1140	1040	900	992	781	975	820	1988	2244	2480	2388	997	1324	1279	2450	1938	2532	1735	2845
chr5	13306466	13307069	604	145	161	196	151	164	74	180	412	265	134	158	165	116	270	98	91	108	81	150
chr8	14602769	14603101	333	25	11	15	15	40	9	14	12	18	18	38	8	6	10	8	6	2	8	9
chr4	116866317	116866503	187	11	7	9	5	10	5	7	15	12	22	10	16	6	10	33	24	13	9	45
chr18	24235640	24237444	1805	476	452	349	467	407	403	423	1138	961	1036	1154	353	436	386	1318	960	904	634	1396
chr4	84237734	84237967	234	10	3	9	6	8	5	7	16	72	6	8	8	6	7	7	4	2	1	3
chr4	3181053	3181854	802	45	62	51	62	34	18	20	102	140	49	51	28	15	48	23	26	20	14	36
chr20	11886286	11886475	190	17	30	17	13	20	4	13	38	54	16	29	7	8	11	8	8	9	8	8
chr18	40017467	40017882	416	71	35	40	16	31	23	44	41	41	42	73	34	60	34	191	61	85	57	74
chr13	97055988	97056307	320	21	18	22	41	38	26	26	44	21	14	27	23	13	26	16	2	8	15	16
chr5	75283984	75284141	158	11	8	12	7	26	1	11	5	2	4	5	2	10	7	4	2	1	2	1
chr6	136927751	136927933	183	26	18	47	35	59	18	20	78	80	14	45	24	31	41	30	16	10	18	19
chr1	115615483	115615703	221	27	17	16	27	23	9	11	51	30	34	33	16	30	25	133	27	40	31	47
chr2	16226661	16226808	148	11	7	7	5	29	4	4	8	8	6	14	2	7	8	2	1	2	1	7
chr1	108240917	108241291	375	32	10	13	14	21	18	9	17	25	26	21	27	49	25	111	31	55	46	39
chr7	127391587	127392033	447	92	70	54	39	47	27	32	84	61	61	83	58	91	62	163	81	172	91	104
chr11	28688271	28688516	246	8	17	8	1	11	11	10	11	22	11	21	9	13	12	66	22	14	11	37
chr7	89466774	89467211	438	42	56	57	23	48	28	32	56	43	42	68	69	109	60	165	147	96	59	146
chr8	104491909	104492071	163	8	10	9	7	6	16	6	32	14	6	5	12	4	7	2	2	6	3	4
chr6	53847326	53847731	406	45	36	43	48	51	21	24	129	209	34	45	32	23	49	38	8	13	20	41
chr3	26141160	26141581	422	26	26	69	13	43	38	17	120	119	63	68	31	33	52	24	24	27	19	25
chr20	436881	437070	190	20	19	20	19	22	4	6	53	23	15	18	12	6	15	6	5	9	4	13
chr8	93935272	93935520	249	34	25	33	21	44	13	48	100	54	17	29	39	20	29	15	10	12	18	26
chr9	27690124	27691069	946	55	18	58	16	22	25	49	93	162	47	17	24	23	43	348	99	91	41	58
chr8	107281894	107282923	1030	690	759	648	535	424	522	451	1051	1843	1216	1267	525	637	542	1438	1141	1228	961	1672
chr18	68290075	68291015	941	180	107	106	77	105	108	54	135	202	102	130	80	93	174	292	174	159	149	421
chr1	118336058	118336369	312	29	6	23	10	28	16	12	29	7	25	34	64	34	59	128	89	87	38	63
chr18	37192504	37192727	224	13	4	4	2	6	9	11	9	10	4	19	10	19	17	42	19	24	23	20
chr3	195233423	195233782	360	14	9	32	21	32	7	9	21	17	19	25	6	5	22	10	12	5	1	5
chr2	10223906	10224479	574	60	53	67	65	74	56	84	218	74	151	105	57	58	101	33	29	74	34	51
chr7	22262868	22263243	376	11	6	29	12	12	9	9	8	76	9	38	16	12	15	9	11	7	1	2
chr7	90661171	90661501	331	50	56	61	30	54	15	22	147	112	51	62	38	40	62	44	25	25	18	44
chr2	154727671	154729239	1569	765	928	548	612	609	696	743	1444	1127	864	1805	827	1392	869	2103	1267	1893	1344	2180
chr5	79983816	79984017	202	16	4	2	17	9	5	9	20	7	16	19	14	10	12	9	6	3	2	2
chr14	33589654	33589813	160	24	22	40	16	21	10	22	64	43	12	19	9	20	23	18	11	7	8	14
chr4	108090524	108090952	429	24	25	21	10	33	10	13	16	29	33	32	18	69	26	110	32	52	57	78
chr13	38787509	38787791	283	19	31	36	14	14	17	11	53	133	22	21	24	12	12	10	12	15	8	8
chr1	222669666	222669827	162	12	8	4	1	25	1	1	9	10	3	7	1	1	5	2	1	1	1	1
chr19	8872927	8873107	181	31	1	9	2	6	4	5	2	8	20	14	2	1	2	2	2	1	1	1
chr3	188209131	188209475	345	17	14	7	13	19	12	7	10	12	10	24	19	10	33	53	30	28	30	39
chr1	90097947	90099383	1437	342	494	285	327	300	298	245	753	855	832	716	288	400	322	943	712	728	467	1198
chr1	179094179	179094384	206	12	12	10	25	7	8	4	52	46	4	11	8	9	11	5	9	5	2	2
chr8	63951060	63952457	1398	635	673	536	497	426	481	387	1050	1352	1071	1255	475	832	579	1554	935	1239	819	1463
chr7	113945010	113945441	432	39	26	43	50	55	27	60	124	29	15	45	44	25	58	29	18	10	22	22
chr6	143751601	143751746	146	8	10	2	5	15	14	3	7	5	2	9	1	13	17	1	1	2	1	5
chr11	105396623	105396772	150	6	19	8	6	15	4	9	12	20	10	21	6	7	16	11	4	5	1	3
chr6	144737051	144737339	289	30	31	49	16	23	17	16	66	172	20	29	6	15	30	16	21	7	9	6
chr5	157078260	157079289	1030	62	55	53	35	66	34	39	98	120	95	159	63	119	54	244	95	125	111	126
chr5	64398492	64399783	1292	293	332	248	225	231	244	277	560	722	497	677	277	438	291	980	439	524	495	723
chr18	55020005	55021653	1649	391	435	326	321	308	325	345	955	699	804	957	391	468	416	1265	607	765	636	961
chr14	41531942	41532589	648	172	180	124	147	196	126	136	258	356	129	196	202	113	238	121	160	106	60	102
chr10	80193785	80194228	444	27	32	43	19	25	27	28	58	37	46	89	47	58	40	155	51	85	57	77
chr7	2943855	2944070	216	11	12	9	5	12	4	11	17	10	12	21	15	12	20	56	15	33	22	16
chr13	82312386	82313098	713	124	133	168	93	88	63	65	116	482	77	121	87	50	127	49	64	69	47	64
chr11	78774364	78774535	172	14	23	24	12	12	17	8	22	30	23	41	15	37	15	90	29	38	27	49
chr4	108952735	108952974	240	45	39	76	27	28	23	22	157	124	24	53	32	15	34	28	9	30	5	30
chr11	69707754	69708314	561	57	29	37	30	61	29	23	74	43	57	76	63	50	48	190	84	83	48	88
chr6	111886499	111886840	342	31	33	29	27	28	23	39	74	36	27	56	49	62	49	160	65	59	73	75
chr2	74881013	74881915	903	623	617	660	482	388	460	406	1043	1347	1014	1007	434	667	541	1295	803	1271	878	1256
chr7	79469962	79470134	173	11	5	4	6	20	7	5	11	5	10	4	7	4	11	1	3	3	4	1
chr11	91665254	91665945	692	72	51	35	42	74	46	58	77	35	90	148	96	182	91	343	167	190	114	193
chr22	29146547	29146714	168	6	1	10	4	9	1	5	8	39	4	10	5	1	11	3	2	1	2	2
chr12	12578653	12578952	300	17	7	27	4	9	19	14	28	90	15	23	13	12	22	8	2	10	3	15
chr5	92956200	92957506	1307	673	636	605	464	369	464	435	996	1569	1190	1115	501	573	584	1572	1046	1075	737	1435
chr21	41745697	41746375	679	39	44	65	83	62	21	24	139	71	51	56	58	46	92	33	24	20	32	42
chr7	70079347	70080087	741	167	142	123	64	78	99	90	138	121	118	235	160	180	200	377	213	259	235	310
chr2	177632993	177633300	308	37	23	19	15	22	10	20	34	57	30	33	32	45	28	54	63	80	32	54
chr1	201857483	201858382	900	138	101	155	114	134	109	73	300	315	229	238	90	130	116	329	215	285	153	323
chr2	64870288	64870752	465	39	42	39	33	35	46	61	71	69	59	72	40	41	38	189	67	79	60	92
chr7	65608410	65608989	580	32	26	19	14	13	21	38	38	34	25	72	57	68	30	240	56	70	71	45
chr18	61637186	61638500	1315	1242	1222	1101	725	726	813	826	2125	2416	1791	2281	1097	1543	1224	2583	1609	2154	1730	2768
chr18	10164255	10164755	501	29	23	23	17	34	23	19	35	24	18	65	37	58	31	163	52	67	38	60
chr11	18332409	18332856	448	17	7	13	3	19	1	16	15	101	23	14	15	9	16	7	5	9	2	4
chr9	5459351	5459555	205	6	17	16	12	13	16	19	46	142	20	39	28	17	34	23	9	6	5	13
chr1	42386314	42386631	318	35	40	49	63	28	10	23	90	75	35	36	16	27	63	19	30	13	8	23
chr10	27985713	27985846	134	4	1	6	6	10	1	8	5	5	9	8	4	1	22	2	2	1	1	2
chr5	141444838	141445202	365	40	17	22	22	23	9	8	36	25	25	18	32	10	36	55	40	61	40	52
chr6	92448129	92448537	409	33	51	36	30	26	4	25	31	60	22	20	21	21	36	10	16	14	10	16
chr5	63985971	63987026	1056	279	239	194	297	239	207	284	573	376	506	558	253	356	253	957	420	427	446	760
chr7	41202304	41202704	401	33	38	37	28	51	27	22	99	37	32	41	46	33	59	23	24	27	19	16
chr7	87848248	87849984	1737	1015	822	803	590	531	593	588	1265	1822	1389	1551	707	902	760	1809	1093	1332	1241	2025
chr4	7208994	7209247	254	42	23	22	7	28	16	17	41	55	36	27	17	16	22	89	81	28	23	55
chr7	140598514	140598940	427	27	30	42	32	80	29	44	91	86	22	40	21	27	52	28	13	24	7	37
chr11	123946573	123947426	854	94	37	60	39	58	59	40	130	81	78	98	81	93	84	231	91	148	77	177
chr18	37997074	37997307	234	10	1	9	2	24	12	7	12	19	13	15	6	10	27	12	2	3	1	3
chr11	116386485	116386808	324	14	3	18	6	24	8	21	23	20	18	43	13	23	9	67	24	36	33	38
chr3	46152201	46152457	257	36	28	19	8	13	18	27	45	51	40	42	34	28	38	70	38	65	47	71
chr10	7513835	7514276	442	24	20	32	15	24	22	24	58	40	48	59	34	32	28	97	36	45	51	77
chr1	173977066	173977532	467	16	21	10	20	32	12	13	61	134	14	33	16	9	5	9	12	5	5	12
chr16	74792859	74793225	367	22	18	39	14	15	6	15	14	67	27	43	10	4	16	7	13	10	1	9
chr6	125269079	125269795	717	59	94	50	71	99	40	49	238	487	45	110	72	50	67	42	50	36	23	60
chr15	52965649	52965812	164	19	13	17	8	13	17	8	45	28	21	12	15	5	16	7	9	8	7	6
chr6	115661111	115661398	288	26	32	40	23	24	17	17	45	68	17	29	14	24	50	11	14	17	10	23
chr3	197431476	197431598	123	9	7	3	7	7	9	6	16	9	23	37	13	8	14	33	17	27	25	34
chr5	41444676	41444912	237	19	12	18	17	28	11	10	79	23	7	24	7	4	26	8	9	2	8	7
chr7	20633654	20633877	224	12	11	11	4	5	11	13	15	9	7	24	6	14	11	69	6	41	22	15
chr12	92490440	92490743	304	21	21	29	18	18	12	15	53	67	21	34	29	35	33	34	14	4	9	16
chr7	67572002	67572620	619	32	25	23	20	32	15	19	43	26	32	26	15	32	33	114	33	37	40	59
chr21	10570596	10570898	303	21	9	9	13	26	8	18	34	18	18	16	12	15	23	12	6	6	5	13
chr11	6044117	6044619	503	39	42	38	34	54	28	47	56	108	47	74	51	40	64	47	17	32	27	39
chr12	106599282	106599456	175	15	15	20	5	8	2	6	17	16	17	28	7	21	19	51	24	33	35	15
chr1	145075157	145076071	915	309	191	225	154	222	125	97	346	337	247	366	135	155	194	592	313	306	207	448
chr3	133195852	133196174	323	29	12	6	11	27	17	9	31	20	24	38	26	31	34	87	50	59	23	42
chr6	158485925	158486369	445	55	39	22	27	55	16	37	80	49	34	50	41	83	64	224	74	87	55	102
chr4	5930159	5930295	137	19	5	10	5	4	6	10	17	16	8	24	11	4	14	46	10	36	20	16
chr3	177913740	177913980	241	21	42	44	27	28	20	38	71	47	32	43	17	17	34	16	24	9	13	25
chr13	35649664	35649939	276	8	18	12	30	16	9	14	61	13	17	11	11	5	13	7	7	7	1	9
chr5	66876953	66877420	468	22	27	48	23	40	9	13	77	94	21	28	24	16	35	16	23	17	4	12
chr18	42982689	42983140	452	41	28	46	31	50	16	21	64	211	20	50	28	28	30	26	23	24	6	19
chr10	62250058	62250272	215	14	9	10	6	18	4	9	13	29	14	38	6	4	13	9	6	2	4	6
chr3	26480602	26481078	477	36	15	48	24	26	20	39	52	121	20	51	34	30	22	16	19	24	13	19
chr6	111265826	111266320	495	203	189	176	191	201	124	156	668	562	143	273	195	166	236	133	146	185	88	136
chr6	106571162	106571694	533	24	7	11	9	22	12	10	22	17	18	28	24	54	27	127	36	42	15	80
chr4	10458191	10459442	1252	169	135	88	114	135	133	86	277	376	350	408	149	203	144	535	282	404	174	423
chr12	66230836	66231012	177	9	6	8	16	6	1	1	7	9	2	6	1	7	17	4	2	1	1	1
chr1	240508281	240508488	208	23	7	24	9	13	5	4	55	19	14	24	12	6	13	16	2	3	4	7
chr5	66308198	66308390	193	71	70	67	71	82	28	62	200	283	57	109	44	63	64	35	52	44	39	48
chr10	95344317	95344506	190	11	13	12	8	25	6	4	68	18	17	12	15	6	25	7	8	6	1	8
chr3	172625829	172626254	426	33	42	57	33	63	38	56	169	96	39	99	45	45	62	45	44	27	25	29
chr8	111887097	111887466	370	21	31	58	46	30	18	21	44	119	25	30	23	28	48	23	10	17	14	29
chr5	40381994	40382425	432	21	11	18	11	19	13	15	52	109	23	23	13	12	17	15	10	6	7	14
chr11	13666990	13667285	296	17	12	18	8	18	12	12	15	76	27	40	7	12	9	9	12	8	1	9
chr15	45289992	45290241	250	9	11	22	7	18	4	9	43	11	7	17	28	12	31	11	4	5	4	8
chr3	134125290	134126201	912	116	83	43	97	86	78	94	184	139	145	191	91	149	77	356	136	203	175	214
chr13	74844139	74844419	281	24	42	24	26	18	17	17	56	72	28	18	17	26	26	12	18	12	9	21
chr3	9484986	9485293	308	27	26	16	33	49	19	23	114	54	21	18	13	11	12	13	7	12	9	19
chr14	19861084	19861233	150	9	2	7	1	26	1	5	23	7	15	15	4	2	12	6	1	3	1	1
chr11	10572219	10572491	273	9	14	27	8	25	8	6	37	69	16	19	15	12	14	13	8	8	3	10
chr5	174481209	174481600	392	10	12	25	36	32	10	11	79	87	17	19	14	8	23	11	7	7	8	16
chr1	64441218	64441436	219	11	7	7	4	10	6	1	12	7	12	27	16	2	11	39	13	14	14	43
chr2	203141083	203141278	196	5	15	22	13	11	11	5	92	109	8	5	14	6	11	6	9	3	2	5
chr1	180933646	180934054	409	67	30	40	22	31	34	23	63	29	44	61	55	75	48	157	53	115	46	151
chr3	189838084	189839012	929	223	191	154	207	173	218	205	425	555	465	560	232	473	192	777	425	550	510	569
chr11	18289282	18289552	271	26	4	15	6	12	6	8	4	45	7	20	4	2	10	3	9	1	1	1
chr8	88374421	88374541	121	12	4	12	4	13	7	7	3	12	2	15	12	6	6	3	4	3	2	2
chr9	92714813	92714983	171	9	7	8	18	21	6	4	45	42	6	11	12	14	1	9	2	4	3	5
chr13	46355790	46356100	311	20	19	15	9	14	4	6	12	31	30	22	14	19	12	81	40	12	17	44
chr19	28780481	28780898	418	39	26	43	26	34	33	19	32	64	43	58	48	21	34	86	52	67	40	121
chr11	60835248	60835700	453	63	18	29	15	32	16	25	46	26	36	55	54	50	40	145	55	76	41	95
chr2	160612289	160612828	540	100	93	96	75	78	53	74	342	390	93	206	68	74	103	51	70	74	57	59
chr10	73760646	73761085	440	31	13	21	16	33	6	16	21	23	24	20	18	18	14	74	25	57	20	44
chr3	98619855	98621022	1168	1556	1461	1321	1099	1118	1050	1048	2407	3041	2286	2509	1057	1551	1334	2769	1993	2528	1834	3214
chr4	105736454	105737223	770	62	63	82	33	86	41	73	138	350	59	160	91	39	65	58	44	40	46	34
chr2	40121098	40121437	340	13	26	17	14	26	9	16	79	31	28	43	7	19	28	16	7	20	1	10
chr7	64254449	64255257	809	500	422	466	216	309	263	265	650	871	581	819	381	492	449	966	577	744	509	928
chr8	138981216	138981461	246	18	47	30	31	27	11	16	53	58	16	17	27	13	32	18	9	18	8	14
chr10	43585400	43586080	681	166	118	104	86	162	135	75	229	131	142	278	188	330	191	407	326	449	246	363
chr5	64512108	64512293	186	8	7	3	1	1	3	4	8	10	10	6	12	10	9	36	5	8	31	14
chr7	142960160	142961137	978	216	222	200	204	152	180	155	367	462	350	519	191	339	242	655	332	442	339	506
chr4	42000825	42001537	713	48	56	103	114	182	49	123	271	126	44	147	68	27	67	55	30	21	36	73
chr8	49426754	49427886	1133	550	412	585	387	253	316	377	745	1056	769	924	349	624	399	1156	744	880	709	1055
chr7	143423583	143423871	289	1	1	1	2	45	1	1	80	1	1	34	20	20	1	1	1	1	1	1
chr6	12354849	12355033	185	7	16	12	5	11	8	12	18	10	18	20	13	12	12	52	11	19	38	24
chr5	88042689	88042846	158	5	5	6	7	11	3	13	11	14	14	12	8	2	11	5	3	2	3	4
chr21	36351792	36351973	182	13	12	13	8	9	4	4	14	10	9	16	12	28	4	11	2	5	1	3
chr6	121282066	121282266	201	9	16	25	15	24	9	16	45	37	16	28	15	11	28	16	6	10	6	16
chr2	119138514	119138751	238	13	7	15	6	6	9	2	29	31	10	20	5	4	9	7	2	4	6	3
chr13	68333231	68333531	301	51	139	86	77	89	32	62	238	150	48	31	70	49	121	30	46	51	29	28
chr11	96094858	96095386	529	35	40	23	59	18	29	29	152	41	36	19	70	25	59	30	8	21	6	30
chr7	28636002	28636406	405	18	18	17	16	18	12	12	43	93	23	23	18	10	22	10	7	10	11	16
chr3	49811937	49812346	410	20	24	35	24	37	19	16	122	47	20	19	30	25	31	13	14	12	8	27
chr12	87140265	87140416	152	4	7	11	4	17	3	1	8	5	16	11	7	6	14	3	3	5	1	1
chr3	168726654	168727250	597	39	51	55	32	49	28	66	84	250	35	68	47	20	22	26	27	22	28	17
chr21	16452860	16453299	440	15	21	8	12	17	17	28	39	35	37	21	50	40	43	179	41	22	63	82
chr2	113388473	113389564	1092	77	45	51	46	71	40	34	97	71	67	111	92	68	100	218	73	137	90	156
chr5	157002065	157003180	1116	78	65	52	48	76	37	58	133	165	101	182	46	98	53	253	124	138	81	152
chr14	91839016	91839434	419	58	50	53	42	52	35	34	83	66	92	98	111	70	83	217	76	171	52	200
chr1	160966051	160966296	246	20	15	23	12	5	4	11	50	121	23	32	19	10	12	7	9	3	7	13
chr5	37839760	37840811	1052	128	97	99	49	99	63	63	149	213	175	248	102	76	99	257	125	184	153	263
chr11	79734543	79735522	980	76	70	65	65	85	56	89	172	138	89	126	71	38	100	60	41	87	35	35
chr9	26329874	26330286	413	75	29	61	30	49	23	17	47	36	86	77	76	108	72	222	82	77	107	221
chr14	65482115	65482392	278	18	15	19	13	19	30	15	29	15	28	68	57	56	49	124	56	100	50	83
chr18	35021070	35021687	618	168	124	124	106	119	146	152	190	103	205	438	264	328	228	874	336	341	307	448
chr7	138927558	138928199	642	80	63	79	75	78	43	34	247	172	77	140	74	47	92	57	45	66	38	56
chr20	37511747	37512346	600	28	12	20	8	30	8	19	31	14	17	19	8	24	22	110	35	34	13	51
chr1	109373203	109373554	352	38	16	16	12	26	29	10	28	55	36	35	9	10	27	80	37	51	37	53
chr2	29118530	29118723	194	48	43	50	42	42	25	28	142	112	86	50	61	51	56	40	32	39	27	35
chr10	98988890	98990190	1301	82	82	102	118	141	64	54	298	340	121	119	96	76	113	75	79	77	36	84
chr6	149532335	149532622	288	8	6	19	16	18	11	13	16	47	15	16	15	10	16	9	6	4	1	16
chr5	101631556	101632625	1070	542	546	459	339	327	429	359	709	1017	643	843	421	767	502	1229	798	952	863	902
chr16	56978985	56979310	326	39	36	55	14	38	23	27	87	104	45	47	24	16	30	17	30	14	11	29
chr7	110563074	110563314	241	40	35	36	15	27	12	20	29	66	20	32	30	9	29	16	17	11	10	18
chr7	44303815	44304509	695	96	85	68	65	101	88	84	216	118	82	195	84	90	100	316	143	198	126	167
chr7	107301536	107302653	1118	111	117	92	119	116	74	83	214	263	188	239	89	129	80	321	170	172	188	269
chr1	110210379	110211241	863	155	141	154	87	112	61	75	329	290	140	267	114	157	96	322	179	324	197	253
chr12	38495893	38496376	484	66	46	75	58	40	58	31	190	205	52	101	56	60	73	63	44	49	20	41
chr21	23233192	23233936	745	80	58	77	30	65	30	68	100	190	66	78	59	52	74	55	44	50	28	45
chr9	71638494	71638937	444	32	21	22	8	28	19	22	59	56	42	48	36	34	16	119	46	42	44	56
chr1	186019614	186019849	236	13	22	11	19	29	12	19	62	92	17	14	21	10	19	6	10	7	4	21
chr2	165601671	165602008	338	20	20	20	24	18	18	30	37	42	22	43	18	11	21	20	12	11	13	12
chr8	6232122	6232276	155	35	18	12	16	6	13	7	12	36	14	29	21	21	17	72	23	44	27	43
chr2	201201741	201201921	181	7	9	10	28	31	9	12	28	17	14	23	17	18	9	9	11	2	6	6
chr18	10563805	10564309	505	36	30	29	29	35	21	29	81	35	35	67	16	54	47	95	51	101	46	91
chr22	46075458	46075855	398	21	26	33	30	64	14	18	79	40	24	28	29	18	45	21	12	20	15	13
chr10	70010808	70011325	518	41	18	17	6	27	8	11	28	35	50	29	24	24	28	91	56	44	24	50
chr10	30934130	30934811	682	56	49	25	26	60	34	33	90	120	37	84	26	61	35	147	79	69	132	71
chr4	81104537	81105758	1222	137	170	123	74	79	77	56	167	351	166	258	68	124	84	305	263	195	138	352
chr11	121535942	121536306	365	27	5	16	4	12	5	15	17	28	19	28	12	5	16	44	34	22	17	42
chr9	101825905	101826104	200	6	3	17	7	7	7	18	21	44	19	9	9	9	5	4	8	2	3	5
chr18	1708081	1708431	351	29	30	38	18	21	22	24	69	67	40	36	30	17	37	19	15	27	8	27
chr2	104995327	104995820	494	61	77	55	15	30	40	55	36	69	65	74	78	157	59	251	145	133	102	188
chr1	142727901	142728316	416	29	8	27	9	22	12	19	13	17	19	25	8	10	16	13	5	2	3	15
chr9	94918098	94918435	338	9	21	6	12	22	8	6	34	13	13	20	28	19	15	105	16	56	12	40
chr11	99804749	99804974	226	9	8	8	2	9	5	9	6	32	12	28	9	4	5	6	4	6	1	1
chr3	196063291	196063696	406	17	15	18	5	17	8	8	26	70	6	18	4	7	10	6	7	5	1	9
chr1	200842216	200843108	893	66	36	49	34	47	41	37	99	77	80	79	36	49	58	142	81	96	39	158
chr15	37359195	37359319	125	9	10	7	13	10	8	13	47	21	14	18	13	25	19	9	8	9	3	7
chr1	2406312	2406771	460	54	17	29	13	24	9	21	38	34	28	34	8	7	14	90	36	44	21	84
chr12	25096881	25097097	217	7	9	17	5	16	4	9	13	79	9	18	11	5	5	4	3	5	2	8
chr7	28398261	28398440	180	68	47	46	44	59	38	39	110	210	84	84	72	31	63	30	46	56	19	33
chr7	38478589	38478986	398	14	35	20	29	40	13	46	114	59	32	40	15	14	38	20	18	18	10	13
chr10	122942651	122943021	371	17	9	9	6	23	5	11	19	11	9	24	26	41	22	107	25	31	51	25
chr6	114316804	114317441	638	85	43	53	36	44	36	33	61	64	43	116	75	84	92	181	114	118	83	125
chr12	42970139	42970579	441	82	126	129	89	78	70	54	211	189	119	95	109	101	141	53	59	95	46	79
chr12	110439518	110439697	180	22	24	28	25	31	13	10	69	83	52	17	16	24	58	14	15	12	19	10
chr11	107433633	107433826	194	36	41	23	28	32	26	32	102	211	23	35	27	22	47	22	20	18	21	16
chr9	136378208	136378694	487	49	33	23	32	35	40	19	85	34	29	96	31	54	38	163	47	158	53	63
chr14	26562447	26562580	134	7	1	10	5	8	7	6	5	10	18	16	5	1	20	5	5	1	1	1
chr2	165791050	165791338	289	13	13	16	11	17	6	14	45	43	16	27	10	8	17	18	6	8	5	8
chr1	143434658	143434968	311	98	46	98	34	72	33	50	40	108	91	73	35	20	64	42	42	29	13	30
chr5	36982112	36982633	522	24	25	32	38	44	14	13	140	206	17	50	9	15	27	21	16	14	9	12
chr1	177614577	177615144	568	55	26	44	34	43	20	19	79	47	42	79	30	41	43	119	44	90	58	80
chr18	70341981	70342280	300	33	23	20	13	31	11	5	37	20	31	31	22	49	24	64	62	100	28	37
chr9	26172288	26172472	185	20	13	23	15	15	10	10	25	27	17	30	18	3	31	13	7	5	5	15
chr1	72308799	72309189	391	23	12	12	25	19	14	14	26	28	15	14	12	18	31	97	27	24	30	44
chr5	75823743	75823922	180	12	6	16	9	17	4	8	16	45	15	10	2	5	17	6	7	4	2	5
chr13	67804056	67805580	1525	947	898	751	814	604	540	605	1343	1915	1098	1353	608	1122	714	2104	1219	1445	1055	1851
chr3	17413852	17414630	779	70	104	100	55	166	63	59	223	140	66	96	89	70	89	85	46	39	49	70
chr13	76111582	76112534	953	433	375	380	325	278	285	391	872	1056	678	864	413	444	382	1109	620	754	520	965
chr3	108064491	108064659	169	8	17	16	4	7	7	5	17	73	8	30	11	11	13	8	8	7	2	1
chr6	73831166	73831296	131	21	11	12	10	25	2	8	12	16	10	7	11	16	28	7	5	5	1	9
chr20	10573421	10573975	555	37	15	51	24	26	16	11	66	296	26	33	20	14	30	14	11	9	14	19
chr12	22087079	22087521	443	41	29	47	42	44	16	51	59	68	22	68	49	20	29	30	14	30	18	21
chr3	150161327	150161611	285	30	31	30	37	30	28	28	75	41	12	58	25	20	31	21	13	17	19	19
chr5	51305604	51305883	280	28	65	28	45	70	25	38	81	26	22	50	34	21	52	27	9	11	20	31
chr4	25031824	25033180	1357	216	156	140	146	146	122	93	396	324	336	404	131	178	136	396	275	283	301	453
chr5	148205441	148206519	1079	522	496	442	456	317	302	301	1007	1142	730	961	367	496	391	1123	615	867	723	1105
chr9	14692638	14693943	1306	376	379	385	273	271	221	260	630	933	545	785	315	421	278	935	509	628	462	827
chr21	42079216	42079499	284	18	23	17	14	21	5	8	27	48	10	21	12	13	21	12	15	3	3	9
chr11	126731978	126732521	544	53	28	42	45	58	39	77	55	56	90	103	85	68	85	362	86	91	110	117
chr8	129263915	129264235	321	26	23	15	19	18	10	12	44	77	19	27	7	6	24	8	18	6	3	11
chr7	11777207	11777730	524	32	37	49	38	40	23	30	74	136	23	36	44	55	64	39	21	29	14	29
chr5	43313121	43314124	1004	1212	1217	1213	850	646	801	733	1853	2440	1770	2023	1000	1472	1252	2443	1635	2361	1591	2509
chr9	45352129	45352775	647	128	84	89	157	86	74	76	176	78	164	187	251	269	196	590	191	298	310	413
chr5	62015703	62016171	469	89	56	55	31	51	34	37	61	81	63	73	57	92	89	153	83	128	89	148
chr16	53779106	53779310	205	26	10	22	3	13	5	8	30	62	16	20	12	7	12	9	10	4	3	8
chr14	59130253	59130748	496	45	30	36	21	45	23	20	68	33	38	43	53	49	49	141	45	54	69	104
chr5	151290620	151290896	277	22	20	30	17	40	18	11	77	45	16	46	33	18	35	9	20	22	3	14
chr9	89096441	89096607	167	6	6	7	3	10	1	1	10	9	5	8	9	3	19	3	1	2	1	4
chr6	138786089	138786479	391	38	32	37	30	47	31	20	89	163	32	42	16	28	41	24	18	24	14	31
chr2	164482964	164483513	550	24	15	34	19	25	13	14	38	169	20	55	9	10	28	7	8	14	7	20
chr6	32503502	32503668	167	6	12	26	4	20	5	7	14	4	28	15	4	2	17	2	8	1	1	4
chr11	6592147	6592608	462	52	11	18	32	26	25	26	49	22	37	23	27	13	17	80	33	104	43	63
chr8	28909921	28910144	224	14	5	2	14	6	1	9	19	15	2	5	4	3	7	1	1	2	4	2
chr15	73864778	73864957	180	15	12	7	19	8	1	2	20	12	5	9	5	4	10	8	2	3	1	2
chr17	44233699	44234729	1031	64	77	134	88	70	20	58	144	263	72	52	56	37	34	60	29	46	19	40
chr22	37930102	37930370	269	17	34	17	22	17	18	2	33	41	11	34	36	18	11	11	8	12	7	10
chr6	84562738	84564129	1392	485	489	360	458	398	382	421	945	680	916	1156	533	658	541	1371	718	907	792	1421
chr12	21680194	21681131	938	145	109	194	77	99	108	99	190	518	288	352	121	173	123	525	336	212	215	384
chr5	58060049	58060521	473	51	41	59	54	38	32	48	186	226	41	144	45	20	64	49	40	22	26	30
chr6	122531061	122531228	168	13	11	14	7	23	7	10	16	8	6	15	13	12	20	3	4	4	5	10
chr6	86159238	86160456	1219	208	302	207	283	167	238	158	362	491	446	528	237	290	215	812	402	605	390	460
chr2	11343626	11344171	546	90	90	88	96	123	53	119	253	302	100	101	77	72	97	78	65	73	44	85
chr1	228154556	228154714	159	10	9	10	5	10	2	6	18	64	8	18	6	4	6	2	6	2	2	6
chr8	117742354	117742676	323	63	46	47	28	48	47	28	58	65	75	80	90	92	72	127	99	124	99	159
chr5	134178167	134178409	243	45	33	43	32	33	34	15	101	182	39	50	16	19	26	26	22	14	18	22
chr18	32178085	32178293	209	22	20	23	22	31	10	20	64	54	19	20	25	22	37	22	5	14	13	19
chr15	36399204	36399476	273	16	16	13	1	13	4	11	34	24	17	20	14	30	16	60	10	48	34	39
chr10	4005320	4005820	501	26	18	43	13	39	25	31	29	91	33	29	21	21	37	17	16	13	5	30
chr6	109069383	109069593	211	23	28	24	10	48	15	18	79	72	29	33	13	9	19	26	14	8	5	15
chr8	29752021	29752232	212	38	39	20	24	29	15	14	65	48	17	28	17	22	20	16	10	26	1	14
chr12	40665636	40666194	559	20	28	40	5	11	15	17	40	76	29	25	15	17	31	24	14	6	6	11
chr8	24813299	24814253	955	46	32	44	32	57	25	29	64	101	94	102	34	43	43	163	57	66	70	124
chr3	28616460	28618411	1952	257	254	192	128	178	226	148	251	506	360	399	209	335	160	498	479	402	349	595
chr10	79542523	79542767	245	18	15	33	11	30	18	14	34	55	20	16	12	12	21	17	7	16	4	11
chr12	47224565	47226351	1787	172	147	139	160	161	129	187	245	342	296	396	166	201	203	761	234	302	290	304
chr3	125032170	125032366	197	6	6	12	7	7	6	9	27	69	3	9	4	10	9	7	2	1	2	7
chr6	110797205	110798097	893	60	45	27	45	59	24	49	105	69	60	107	34	44	29	173	73	108	56	101
chr5	7991319	7991636	318	29	13	20	7	21	18	19	20	18	33	25	17	52	21	127	38	44	40	40
chr5	38756283	38756449	167	23	25	25	18	10	18	11	30	50	20	15	22	12	20	10	8	17	7	11
chr2	15767390	15767562	173	8	8	14	13	22	8	14	22	38	5	21	11	5	13	5	3	2	10	8
chr14	88793942	88794132	191	30	38	35	65	50	24	22	79	45	58	29	39	27	78	17	28	27	12	23
chr2	216176379	216177400	1022	601	595	572	465	419	433	400	1009	1305	1000	1023	415	676	629	1314	841	990	810	1274
chr12	39104174	39104308	135	11	16	14	4	9	7	6	12	9	8	13	7	18	17	7	4	4	4	4
chr1	46035708	46035982	275	24	26	35	21	26	25	25	83	61	43	49	26	24	32	25	25	22	14	19
chr18	7786592	7786937	346	51	26	27	24	52	11	29	85	68	33	32	38	9	43	22	18	20	8	25
chr10	127513379	127513543	165	49	37	38	40	40	10	15	39	45	56	38	16	10	35	20	19	17	13	11
chr2	65170698	65171247	550	48	51	47	38	52	47	28	114	107	54	121	65	71	78	174	100	104	79	109
chr3	167633476	167633706	231	11	6	13	8	15	4	19	21	18	10	12	11	5	14	11	3	6	3	4
chr10	76677172	76677650	479	74	92	106	52	91	58	38	232	252	88	88	64	70	102	55	54	68	43	56
chr3	67914860	67915210	351	23	4	40	11	21	10	12	16	32	29	17	10	9	12	11	13	1	5	4
chr6	101528456	101529037	582	62	72	81	50	71	32	60	171	105	64	55	99	39	143	58	53	26	12	56
chr4	160484539	160485152	614	26	15	24	10	20	17	23	57	204	24	52	15	13	19	10	14	15	4	16
chr2	119980947	119981992	1046	257	192	247	146	168	162	146	407	716	334	510	126	211	159	578	407	426	271	531
chr20	39686739	39687352	614	60	67	52	41	87	36	54	366	270	67	85	50	47	38	59	34	48	21	33
chr7	123210548	123210795	248	31	25	22	18	18	4	20	26	48	22	28	21	7	19	17	11	9	10	9
chr7	32540581	32541460	880	62	48	58	68	47	46	40	144	160	50	88	52	40	58	72	42	35	20	43
chr16	46797043	46797417	375	48	14	25	7	27	16	13	32	36	24	35	20	21	32	67	24	68	23	91
chr2	178681790	178682244	455	20	9	15	7	15	4	10	25	12	9	26	25	15	25	55	35	22	18	46
chr8	49309197	49310109	913	123	86	59	52	65	43	47	78	114	174	125	115	156	74	269	153	154	117	307
chr13	106458358	106458575	218	3	4	4	7	10	3	4	2	9	9	8	5	2	1	17	4	6	26	19
chr1	179279630	179280381	752	60	47	62	39	79	32	29	176	154	37	87	43	36	64	42	20	48	31	34
chr12	22486836	22487201	366	56	62	21	35	38	21	28	69	79	78	137	33	60	37	169	43	71	126	140
chr2	25094709	25094923	215	12	11	5	5	14	7	1	15	10	17	28	7	17	14	57	14	29	20	20
chr22	21147540	21148354	815	39	47	39	42	60	31	40	143	101	67	28	57	45	59	19	18	28	17	61
chr1	235844928	235845267	340	23	13	16	22	33	11	13	76	48	11	30	22	12	16	22	4	13	4	14
chr9	28197737	28198194	458	54	55	62	65	63	38	50	127	55	84	70	91	38	119	23	31	34	27	66
chr9	68438664	68438915	252	43	29	36	16	31	7	17	11	28	21	16	8	6	32	8	7	7	2	18
chr3	64253385	64254134	750	73	97	56	67	85	47	47	130	127	156	160	66	75	71	263	101	109	119	216
chr2	187457293	187457416	124	46	67	42	59	62	26	24	140	115	56	48	47	37	75	41	24	43	8	45
chr4	48908041	48909140	1100	273	272	207	183	176	163	136	478	562	355	403	258	293	250	664	381	409	263	570
chr11	101488813	101488944	132	10	10	15	9	15	5	13	15	28	14	13	23	8	19	13	6	6	4	5
chr8	48173061	48174256	1196	273	250	267	218	220	209	180	446	818	589	626	156	194	168	632	475	627	370	740
chr22	20325788	20326338	551	34	10	20	14	28	12	35	99	43	28	55	10	8	14	15	2	8	11	19
chr12	78389141	78389452	312	32	42	33	14	21	16	16	54	95	17	35	20	23	26	24	11	24	10	8
chr14	93425296	93425942	647	61	30	42	30	29	34	33	66	60	48	59	67	72	50	170	54	110	63	98
chr8	136202128	136202334	207	23	33	31	14	54	13	18	65	44	27	25	25	9	36	19	15	21	8	5
chr3	146060915	146061273	359	12	27	19	10	39	7	9	58	42	12	15	24	20	17	8	9	11	9	9
chr6	40429765	40429973	209	11	4	11	6	9	12	7	21	17	15	21	21	7	15	8	6	7	2	6
chr13	104890559	104891267	709	30	62	23	34	14	15	15	36	69	56	20	38	38	62	12	24	16	7	20
chr18	37042478	37042733	256	22	22	10	3	21	15	15	38	60	18	37	24	27	32	17	11	16	5	10
chr1	223209564	223209950	387	23	25	17	13	22	6	7	41	130	11	21	4	7	12	4	14	4	2	7
chr3	118716161	118717025	865	32	36	46	16	53	14	19	122	123	37	57	37	14	48	28	22	18	15	26
chr2	213220241	213220677	437	11	16	8	9	41	11	14	19	22	9	17	17	15	13	15	8	3	5	4
chr4	124981443	124981579	137	19	18	8	8	7	9	5	24	13	11	10	11	14	17	13	4	2	5	4
chr4	152476847	152477007	161	13	17	10	13	34	12	8	59	45	9	15	14	1	15	10	2	2	7	11
chr3	13059503	13059905	403	59	26	35	11	43	21	29	58	44	43	60	48	41	31	119	49	104	39	81
chr10	18412134	18412321	188	15	6	6	8	7	3	7	11	8	14	19	6	10	12	48	18	14	13	17
chr10	28881864	28882203	340	28	25	40	39	50	17	32	63	170	40	65	15	22	38	24	25	22	12	24
chr6	49468691	49468870	180	17	9	5	3	12	7	15	37	14	11	24	15	8	9	8	6	4	4	6
chr9	73909341	73910239	899	72	44	66	59	109	58	49	174	65	72	85	55	22	73	58	35	33	27	47
chr2	170365835	170366151	317	59	70	59	88	55	44	92	135	113	104	103	80	84	148	59	31	71	29	70
chr4	8200632	8202756	2125	510	434	475	389	417	355	285	956	1109	834	876	386	464	448	1109	624	867	697	893
chr1	52985922	52986104	183	18	10	16	14	27	8	11	95	39	20	14	25	12	19	12	7	16	6	4
chr2	200767773	200768164	392	14	14	20	18	11	11	13	40	66	30	30	12	14	19	11	8	2	7	23
chr10	65122509	65122782	274	16	18	20	11	30	11	10	84	17	9	12	14	11	17	7	9	7	5	10
chr4	21472129	21472544	416	29	31	21	22	36	39	39	39	56	56	75	47	67	51	89	92	68	106	86
chr2	192146079	192146446	368	23	13	30	14	18	24	14	31	19	31	51	16	33	12	135	64	36	23	31
chr11	103482306	103482629	324	25	12	9	2	19	16	22	16	25	33	50	23	9	25	73	37	57	63	16
chr15	70544636	70545121	486	39	15	23	18	20	14	8	47	18	33	33	22	26	18	73	28	69	41	35
chr7	56101453	56102338	886	156	159	163	140	116	118	100	264	299	251	284	188	202	192	390	250	258	237	354
chr11	30953268	30953459	192	11	2	10	9	8	2	6	9	6	2	1	5	6	9	48	14	13	6	16
chr11	116567172	116567508	337	13	16	23	20	45	12	18	43	26	41	39	26	25	48	81	40	98	29	60
chr4	7537566	7537841	276	18	11	17	5	19	5	11	16	12	5	13	10	18	19	35	31	29	15	38
chr15	53072607	53073137	531	47	67	78	38	28	42	36	62	145	61	85	61	42	54	29	37	30	24	51
chr14	33075661	33075938	278	3	6	18	11	4	7	13	10	53	41	9	3	5	7	7	1	5	1	5
chr2	132088649	132089048	400	21	5	20	16	19	8	9	34	28	23	34	10	39	7	63	25	48	30	47
chr1	151397464	151397804	341	13	10	16	28	14	2	12	16	22	9	14	10	2	11	3	1	4	5	10
chr13	97610486	97610772	287	16	22	25	26	29	15	20	60	38	24	46	29	15	27	25	9	11	9	26
chr2	220391517	220392172	656	128	82	78	126	114	97	72	279	92	193	218	112	149	146	424	131	306	257	225
chr5	124317373	124318087	715	83	53	101	28	60	61	80	205	386	87	115	105	51	63	72	55	41	41	39
chr6	20909939	20910363	425	27	15	24	6	23	4	16	32	102	18	46	10	5	10	8	8	13	1	9
chr3	52050030	52050591	562	13	10	22	13	30	8	19	32	17	56	57	34	40	31	111	63	56	42	45
chr3	127386004	127386215	212	26	14	6	1	16	8	6	21	12	22	18	10	9	12	28	25	54	15	28
chr7	100645636	100645880	245	51	13	23	17	16	6	9	21	38	21	6	2	5	24	10	4	5	6	6
chr8	140799328	140799609	282	30	20	29	27	30	17	18	38	85	39	37	19	25	31	20	13	29	11	16
chr1	51655088	51655331	244	14	13	23	10	14	11	18	33	46	22	25	15	10	17	12	9	7	9	14
chr13	36465850	36466843	994	195	181	257	147	235	150	127	599	667	165	278	177	115	344	119	155	163	92	157
chr3	170136190	170137039	850	84	72	49	81	72	40	42	173	136	134	159	64	50	62	208	138	144	104	137
chr2	79350121	79350322	202	21	16	18	2	17	5	10	17	39	16	46	6	12	16	11	7	6	5	8
chr11	16414251	16414594	344	42	40	43	61	51	16	33	65	66	41	34	23	26	33	24	18	22	25	21
chr1	169395479	169396959	1481	182	186	143	88	154	113	112	229	331	234	249	171	201	168	382	194	339	198	409
chr8	122174549	122174822	274	22	41	22	12	26	12	10	49	127	21	35	12	6	24	12	8	12	9	15
chr3	72107625	72108098	474	70	21	38	26	34	39	30	81	45	89	107	99	85	88	283	95	114	67	173
chr1	5357307	5357867	561	57	19	29	11	39	29	16	44	42	49	27	12	28	58	117	51	74	39	90
chr1	74808681	74809448	768	204	183	195	147	188	150	152	217	99	183	349	324	435	264	833	403	322	385	762
chr14	77234353	77235051	699	65	50	52	22	61	57	38	108	81	84	130	42	70	70	206	99	159	56	112
chr14	97005060	97005446	387	25	16	24	40	38	22	27	73	86	34	47	22	27	23	32	28	13	10	11
chr4	119747060	119747240	181	35	23	30	37	50	22	11	52	79	29	35	29	21	60	29	15	11	14	29
chr10	42862899	42863823	925	235	184	189	77	81	141	117	345	394	207	285	270	392	159	781	285	473	258	518
chr8	61472276	61472545	270	34	32	40	76	73	8	31	103	30	9	37	31	19	27	22	9	8	13	24
chr5	11384537	11385687	1151	270	311	131	289	181	160	182	365	310	464	405	172	278	175	588	377	507	447	559
chr1	207021067	207021236	170	17	11	8	7	9	3	6	13	28	16	11	6	2	5	6	5	1	5	2
chr9	25677349	25678861	1513	975	930	887	804	741	601	724	1686	2561	1799	1765	775	1063	885	2352	1391	1811	1156	2178
chr6	64350081	64350265	185	50	105	99	86	120	46	83	327	232	90	162	72	50	127	76	64	50	44	80
chr4	40553825	40554063	239	32	19	23	18	32	14	14	77	89	17	14	15	20	15	11	14	10	12	12
chr6	164551303	164551571	269	30	17	20	10	12	14	12	24	20	15	45	39	40	30	88	55	53	28	47
chr1	142868937	142869134	198	15	9	28	14	10	4	3	11	9	11	9	2	8	14	2	4	3	4	5
chr10	89691553	89692148	596	85	83	107	102	145	59	76	180	77	76	101	88	60	135	54	38	64	35	90
chr11	46494060	46494772	713	57	63	74	55	67	42	37	126	193	76	109	54	40	69	56	58	45	33	40
chr4	132612824	132612993	170	11	17	23	6	29	5	12	12	24	16	19	12	6	13	10	7	7	4	5
chr15	51979717	51980005	289	37	18	24	21	26	30	25	84	41	49	58	54	12	53	32	10	27	14	13
chr4	146631084	146631426	343	32	46	40	37	43	23	24	102	230	35	76	28	19	59	30	24	32	4	29
chr14	50827605	50827934	330	18	22	34	27	19	11	23	57	139	27	22	26	21	25	18	17	10	9	20
chr7	7284511	7284664	154	6	2	8	14	25	7	15	16	6	2	18	8	7	7	3	4	2	5	1
chr5	58069507	58070138	632	83	36	54	46	72	43	47	126	106	74	160	75	116	118	280	92	131	110	186
chr7	18196834	18197061	228	23	16	25	12	17	11	18	65	40	18	13	16	9	20	9	11	12	8	10
chr12	62726473	62726864	392	33	36	45	33	60	24	48	175	157	29	56	54	27	65	27	13	26	34	33
chr10	56873630	56873765	136	7	1	4	2	9	7	1	8	17	8	10	14	1	5	3	2	3	1	1
chr1	16050280	16050717	438	41	48	21	29	49	43	22	106	51	45	104	56	55	51	166	74	134	64	79
chr11	69458903	69459397	495	52	47	29	14	36	39	26	81	56	115	80	60	51	50	102	101	110	76	122
chr1	179711871	179713334	1464	87	77	63	65	111	30	66	168	120	167	202	68	64	72	224	134	177	113	194
chr1	68517143	68517643	501	67	71	33	37	45	27	38	83	130	84	90	48	89	46	182	91	104	85	106
chr3	158099092	158099652	561	50	51	65	57	80	45	39	116	230	55	49	78	70	55	56	23	44	30	54
chr9	111383725	111383936	212	13	5	17	3	21	3	9	11	5	19	10	7	1	14	4	5	4	1	2
chr13	30949524	30950197	674	41	16	36	29	31	26	28	64	34	51	58	59	33	47	143	49	93	42	79
chr3	135889909	135890438	530	51	21	56	30	31	11	30	143	157	14	30	33	17	36	23	12	15	16	24
chr2	165755763	165755957	195	30	18	31	37	49	23	38	75	21	19	46	39	30	35	33	14	12	15	19
chr6	126862942	126863479	538	55	58	56	24	56	40	38	77	124	35	70	65	60	87	32	35	29	31	46
chr15	86210914	86211894	981	143	151	148	99	105	101	92	282	414	174	221	128	120	138	108	102	121	62	147
chr18	32679926	32680159	234	17	32	25	26	30	15	8	67	41	26	16	16	12	37	8	11	13	5	22
chr8	80910410	80910624	215	27	14	13	29	38	12	20	44	26	5	19	7	3	16	8	4	4	5	15
chr5	38258570	38259378	809	84	70	68	45	64	52	36	90	151	104	145	72	99	62	183	109	141	114	129
chr13	100331723	100331981	259	30	38	57	20	25	23	20	102	231	12	37	32	20	28	27	15	19	6	21
chr3	8542874	8543622	749	628	501	628	523	429	390	386	981	1403	935	1131	497	724	474	1330	870	991	771	1300
chr3	42797685	42798019	335	27	14	27	13	21	7	10	12	52	14	22	14	3	13	9	8	5	4	12
chr18	5963787	5963933	147	8	5	7	7	26	1	10	6	11	8	3	3	3	6	3	1	3	1	3
chr10	129600990	129601577	588	20	14	8	15	25	23	31	28	29	26	57	29	43	17	89	25	29	174	26
chr7	15251976	15252409	434	49	60	67	51	71	45	71	115	154	55	91	85	50	84	60	69	28	26	41
chr3	161059812	161059975	164	13	11	14	28	9	6	10	54	28	17	30	10	8	19	19	3	6	5	8
chr18	35078747	35079293	547	26	37	23	16	22	15	22	50	32	26	71	39	35	43	98	53	55	44	65
chr5	86694821	86695291	471	35	23	28	38	44	16	29	80	47	55	79	29	41	34	36	16	22	19	31
chr2	146003011	146003326	316	19	8	15	10	15	6	8	11	56	18	34	4	10	16	6	9	3	2	12
chr1	248794935	248795160	226	11	4	11	9	11	7	9	16	32	3	16	7	3	9	3	5	7	1	4
chr2	13677140	13677524	385	15	17	26	7	16	15	25	48	186	16	63	10	6	8	13	9	8	3	12
chr5	113390773	113392179	1407	176	204	143	121	98	125	114	312	552	288	391	195	269	154	521	323	329	300	433
chr12	65140539	65140907	369	37	19	29	8	28	10	24	53	85	26	33	12	15	16	23	11	11	11	12
chr1	215392685	215393064	380	27	17	25	13	32	4	11	36	45	19	20	8	20	25	8	11	10	6	16
chr3	189848991	189849483	493	21	28	27	25	32	26	41	60	128	43	46	34	25	25	18	14	20	8	41
chr11	35973282	35973546	265	12	16	16	18	14	11	23	40	41	26	41	18	19	33	70	25	61	26	45
chr3	62856097	62856286	190	61	40	53	71	58	33	29	150	100	48	81	29	40	71	65	37	18	23	34
chr4	64472742	64473446	705	44	19	26	33	30	42	28	34	38	54	94	82	77	55	302	52	64	72	160
chr13	106457018	106457329	312	26	17	8	14	10	17	14	10	29	21	34	7	26	20	39	30	28	42	61
chr3	149592372	149592775	404	17	22	13	18	16	7	12	67	33	10	21	14	11	26	15	4	11	1	15
chr15	80399671	80399889	219	10	11	4	10	22	2	6	45	31	4	14	7	10	7	4	4	2	1	10
chr6	121061838	121061984	147	10	5	5	14	1	1	8	3	7	10	8	5	5	7	3	1	1	2	3
chr5	158737271	158738220	950	86	103	61	58	76	35	56	163	95	131	193	89	95	120	300	119	156	154	152
chr22	30714522	30714712	191	8	4	7	7	29	12	2	22	9	16	13	6	2	9	4	6	2	1	4
chr18	48247662	48247790	129	5	1	6	2	7	1	10	15	11	8	7	3	1	17	1	2	4	1	1
chr10	109674132	109675408	1277	135	162	112	74	161	58	106	217	241	245	231	130	141	140	392	222	277	126	305
chr3	57083917	57084093	177	10	10	18	8	17	1	6	10	8	11	11	1	2	24	5	4	2	3	1
chr12	107450840	107451249	410	32	39	33	39	48	33	20	84	69	35	62	50	27	58	37	29	19	16	35
chr18	46139914	46140606	693	71	33	31	32	39	31	45	111	33	65	139	92	97	56	249	73	168	113	107
chr5	43191781	43193111	1331	595	717	489	491	406	365	433	1093	945	1191	1054	418	600	648	1254	826	1278	780	1484
chr2	192093661	192093915	255	19	18	10	2	12	14	15	16	30	37	42	55	43	38	103	45	57	44	88
chr5	128300582	128301722	1141	340	222	194	94	221	106	72	396	418	291	237	204	270	241	485	517	366	216	608
chr5	68812357	68812635	279	9	11	24	9	13	12	12	28	96	23	25	8	5	9	9	6	3	10	6
chr3	102093118	102093282	165	19	13	13	7	14	9	2	25	22	15	10	7	7	14	13	5	2	2	7
chr6	106921832	106922174	343	17	11	29	9	28	8	9	34	98	14	53	6	10	19	9	11	9	6	9
chr18	896597	896917	321	61	32	53	65	103	49	56	122	73	52	46	45	15	75	41	42	29	11	27
chr12	56516457	56516765	309	65	29	32	47	54	43	35	115	41	83	127	144	103	103	362	109	131	131	165
chr13	37408528	37408711	184	19	36	30	22	22	12	6	40	60	11	15	15	9	18	12	11	11	1	13
chr13	91804404	91804600	197	7	10	3	8	5	9	15	21	15	21	26	8	3	17	3	8	2	1	8
chr16	64687581	64687741	161	4	6	3	4	16	12	1	10	6	10	6	3	1	2	3	1	1	2	1
chr3	107363590	107363938	349	43	49	65	50	96	31	71	186	114	36	60	75	36	66	48	26	43	30	38
chr10	62030194	62030488	295	20	30	15	31	41	21	21	75	69	16	16	42	22	40	18	12	18	6	24
chr3	94433153	94433313	161	12	16	19	9	16	10	18	43	24	3	22	21	4	14	15	7	2	2	9
chr6	129965769	129965936	168	20	17	23	20	30	15	26	32	59	27	43	33	18	32	16	23	11	13	15
chr6	168256325	168256844	520	90	79	80	92	145	74	87	325	250	75	146	88	100	119	112	44	87	61	64
chr10	72679037	72679234	198	19	11	10	8	11	6	8	13	22	17	35	15	20	11	67	17	32	11	38
chr8	29917148	29917484	337	18	26	25	32	22	10	13	49	113	15	41	14	10	29	7	12	10	7	23
chr2	173864454	173864618	165	13	5	19	6	4	4	2	26	81	11	9	10	8	8	7	6	2	1	4
chr3	160358593	160358790	198	14	7	18	8	16	3	10	46	21	10	16	13	7	8	10	3	4	2	11
chr4	132505552	132506071	520	15	13	18	15	46	11	8	33	27	32	22	23	14	32	114	64	22	25	41
chr2	86299387	86299938	552	77	58	55	34	47	42	25	43	82	88	109	63	147	91	294	97	169	66	198
chr7	78664652	78664937	286	16	10	24	25	37	13	30	91	27	8	36	14	4	17	18	6	12	4	8
chr2	16807862	16807984	123	24	11	20	9	24	8	12	37	22	29	30	26	10	17	40	40	47	30	32
chr10	96990410	96991019	610	91	80	92	64	88	54	59	203	159	132	176	94	55	82	238	114	171	115	166
chr5	161452332	161452791	460	48	72	79	55	42	27	83	111	68	16	49	69	26	48	31	36	15	14	37
chr14	50374615	50374889	275	18	14	11	9	14	12	7	41	54	17	23	8	9	7	6	6	9	3	13
chr1	116380311	116382509	2199	101	87	132	60	80	50	38	134	166	158	201	44	54	88	315	206	103	72	291
chr2	66704713	66704883	171	20	22	12	11	23	8	18	48	27	38	25	12	12	26	15	10	9	8	14
chr9	20765721	20765853	133	11	8	10	6	13	6	4	26	12	10	13	12	4	28	11	4	1	1	7
chr5	84020663	84021326	664	23	34	24	6	29	12	20	32	121	26	47	31	27	34	20	14	17	10	17
chr8	16375687	16375798	112	10	8	15	10	6	9	2	4	10	8	9	13	5	4	8	4	1	1	1
chr8	9791176	9791551	376	47	21	36	30	23	28	25	36	148	42	49	33	83	33	131	75	74	74	109
chr21	16350136	16350702	567	22	18	20	22	18	17	24	39	18	25	51	22	36	38	105	28	48	35	73
chr4	26601488	26601653	166	2	4	5	1	5	1	2	6	8	3	11	4	15	6	1	1	1	1	3
chr4	156354558	156355385	828	100	106	95	71	95	110	137	244	421	94	234	91	102	99	108	85	80	61	70
chr10	81034137	81035282	1146	201	160	110	110	154	114	102	344	137	237	314	136	153	181	441	179	363	299	286
chr3	192090311	192091143	833	45	31	43	32	50	21	42	40	54	33	79	103	80	66	342	75	83	76	100
chr2	197075989	197076367	379	33	25	16	15	27	7	17	32	27	21	34	29	30	15	91	44	50	22	39
chr9	73517314	73517982	669	63	72	103	77	106	48	77	326	352	122	123	73	48	100	64	59	63	31	87
chr5	115776802	115777246	445	18	10	18	10	20	8	12	30	9	16	64	25	34	27	100	35	57	16	62
chr15	74731133	74731461	329	50	38	46	22	37	16	35	65	75	55	58	34	14	26	28	13	21	21	34
chr7	83890865	83891118	254	13	11	9	9	23	8	8	7	21	22	23	5	26	21	56	25	34	21	35
chr2	86529463	86529691	229	14	7	7	6	3	6	13	22	11	6	22	9	11	12	53	13	12	20	28
chr14	58027438	58028008	571	56	62	65	64	111	30	45	168	113	34	87	61	59	76	31	25	51	33	56
chr6	3925512	3925721	210	12	6	8	2	4	8	7	8	9	14	20	20	12	5	60	16	27	10	17
chr9	18721323	18721940	618	59	31	51	39	60	47	24	82	58	65	104	65	95	85	190	126	107	61	146
chr8	91925908	91926357	450	32	24	31	7	25	18	27	37	38	27	57	36	49	34	119	76	40	38	60
chr1	93376437	93376673	237	6	6	12	9	3	6	6	14	13	10	12	2	18	4	49	8	22	16	16
chr12	130554669	130555176	508	37	25	27	22	31	20	25	37	47	38	77	32	32	19	113	46	69	33	55
chr9	22158224	22158672	449	64	47	53	35	63	20	47	109	103	52	60	39	19	62	29	35	43	14	31
chr10	106562799	106563163	365	15	30	32	18	38	17	24	34	81	42	21	14	30	41	28	22	12	6	11
chr5	5494604	5495177	574	148	128	152	70	77	82	72	130	235	181	230	84	87	62	244	171	202	210	242
chr14	32811264	32811624	361	43	19	40	31	51	20	29	64	93	24	40	28	10	28	28	11	24	16	17
chr9	32384200	32385259	1060	558	460	511	458	364	315	315	909	1263	967	1000	372	566	420	1139	752	947	713	1157
chr8	112643757	112643992	236	11	8	16	4	12	3	22	17	12	14	9	14	8	14	15	3	1	4	1
chr12	93437566	93437715	150	9	3	5	4	14	16	3	9	6	7	8	4	5	9	1	3	2	2	4
chr3	158103213	158103767	555	36	82	71	60	113	36	67	114	76	58	29	67	37	93	39	23	39	17	55
chr3	193019201	193019534	334	22	34	43	28	44	12	29	79	155	30	23	34	28	39	11	15	9	16	38
chr6	128750421	128750952	532	60	39	74	39	77	41	68	92	104	38	54	47	38	59	27	33	39	33	34
chr4	117509713	117509866	154	12	4	3	5	16	5	18	9	8	8	16	2	3	5	1	6	1	1	3
chr5	141211993	141212326	334	23	5	12	4	5	6	12	12	38	11	8	3	1	8	8	3	4	1	1
chr4	24913826	24914910	1085	511	412	441	379	336	377	410	1115	1293	1039	1163	364	516	399	1322	831	956	671	1303
chr2	29530427	29530713	287	24	19	42	42	30	11	21	89	96	26	56	30	21	22	30	14	23	8	21
chr9	21031133	21031801	669	84	73	62	56	43	40	25	126	117	109	146	43	66	37	206	86	109	103	152
chr11	4203282	4203610	329	42	30	55	17	40	18	20	52	75	51	91	20	62	29	121	71	61	60	86
chr2	136700713	136701178	466	39	15	31	26	51	26	15	95	89	33	34	27	19	49	25	15	27	11	22
chr10	65511509	65512366	858	53	52	32	39	54	18	51	79	48	76	63	95	54	64	247	79	67	61	193
chr2	131720949	131722357	1409	90	82	47	74	101	50	52	160	108	201	166	69	84	89	251	183	174	113	159
chr21	34784444	34784699	256	27	23	21	5	12	4	5	34	82	13	26	7	9	8	10	7	8	3	6
chr9	108824643	108825013	371	74	80	92	94	99	65	79	179	124	116	130	115	55	152	52	56	73	54	81
chr11	34647933	34648230	298	48	32	32	36	27	10	26	83	72	15	31	19	22	28	26	14	12	9	27
chr3	25824285	25825574	1290	658	617	565	436	329	410	425	1046	1455	1093	1268	440	607	476	1385	1016	1074	769	1343
chr16	71780453	71780566	114	15	14	14	14	21	7	8	24	17	18	8	27	6	14	8	6	10	3	7
chr13	33022322	33022587	266	27	18	17	17	34	10	12	91	32	11	24	12	12	14	15	10	10	5	11
chr1	85929833	85931243	1411	517	396	361	389	291	304	316	772	1075	833	980	279	422	302	1089	739	798	519	1135
chr2	235304553	235305021	469	31	4	27	10	32	17	10	25	8	20	31	15	18	30	95	33	30	35	59
chr11	105522272	105522888	617	53	25	35	24	47	13	36	70	46	46	58	19	17	36	39	22	19	6	20
chr12	76153604	76154423	820	68	67	82	94	75	39	64	209	359	67	108	62	36	69	66	34	44	45	58
chr4	184547282	184547668	387	20	10	12	6	22	12	5	34	127	14	49	1	7	12	12	4	1	7	5
chr5	112429396	112429620	225	27	23	20	12	29	18	11	72	43	21	27	12	2	21	15	6	10	10	12
chr11	10177455	10178160	706	81	95	69	71	66	70	55	220	130	122	196	71	105	108	315	108	167	124	204
chr10	68960396	68961158	763	71	44	63	35	73	27	34	112	98	33	68	50	42	75	50	26	36	21	49
chr5	120215543	120215658	116	8	4	7	5	7	4	8	11	8	15	14	3	13	13	3	1	5	2	6
chr15	23916528	23916733	206	16	18	24	4	19	8	4	44	34	17	8	19	12	26	9	5	14	4	5
chr4	26732829	26733129	301	21	14	12	12	14	6	17	36	59	19	10	7	4	21	13	8	6	4	7
chr7	27749398	27749820	423	30	38	30	35	34	25	24	82	115	28	36	27	15	28	29	21	10	18	23
chr16	46490628	46490785	158	15	4	14	11	5	5	17	15	10	11	16	1	2	6	5	2	4	1	5
chr14	69693010	69693178	169	10	8	13	3	11	12	2	4	34	8	14	3	2	2	2	3	2	4	1
chr12	32721277	32721626	350	66	70	61	47	87	33	43	165	82	50	112	55	56	76	59	48	21	46	28
chr1	180897057	180897638	582	73	44	25	39	52	34	39	85	39	69	146	59	99	53	223	97	105	83	142
chr2	153093193	153093430	238	16	6	11	8	23	7	6	16	18	17	27	16	26	19	36	13	70	19	43
chr1	100700078	100700325	248	15	20	26	18	6	4	10	61	117	14	25	8	11	16	7	7	14	4	6
chr10	59113300	59113696	397	12	15	16	5	13	8	6	20	16	21	24	22	31	23	46	36	21	17	77
chr4	127812545	127812771	227	12	4	17	20	20	2	7	8	14	9	10	3	10	14	6	6	3	1	4
chr1	169555488	169556267	780	139	132	110	64	91	82	61	126	239	132	218	78	119	99	307	170	199	147	182
chr16	57905456	57905806	351	12	17	14	19	17	10	12	56	68	19	25	10	17	14	23	12	9	2	3
chr11	92563979	92564268	290	45	12	33	11	22	14	30	38	26	32	55	50	54	45	158	39	79	32	111
chr2	172617767	172618010	244	2	2	6	8	14	10	2	19	15	10	23	24	29	16	72	26	42	13	37
chr2	211621442	211621904	463	39	100	69	46	72	32	50	99	131	44	38	53	47	70	24	39	42	20	40
chr7	45928014	45928832	819	69	54	54	39	85	37	72	113	123	148	135	51	91	46	204	114	150	114	125
chr17	62083147	62083448	302	19	8	17	5	18	5	5	23	20	11	25	18	19	21	65	23	34	17	26
chr1	102549022	102549198	177	15	3	12	12	8	1	14	13	7	8	10	4	1	16	5	4	3	1	2
chr6	155075132	155075748	617	36	22	44	40	60	27	44	148	103	49	79	53	17	35	40	23	32	19	29
chr9	126235364	126236067	704	38	25	46	20	44	20	30	54	36	36	99	51	72	59	164	59	81	62	112
chr12	32831799	32832960	1162	682	706	575	647	515	535	537	1292	1731	1450	1458	572	755	700	1769	1082	1484	893	1685
chr11	79863529	79863694	166	15	6	12	1	6	4	10	13	13	15	9	6	23	7	5	8	1	1	3
chr6	16689356	16689608	253	24	10	10	21	20	11	11	25	58	35	23	8	16	14	17	9	7	3	14
chr7	124404618	124405340	723	101	81	86	62	62	82	79	145	214	137	172	82	87	79	296	120	105	163	207
chr4	113626635	113628083	1449	193	238	135	128	152	129	133	398	349	224	286	197	234	164	492	283	359	207	401
chr1	177276073	177276402	330	11	10	19	10	13	7	7	14	52	16	24	13	5	10	13	6	4	3	8
chr12	54566951	54567425	475	38	22	31	26	28	17	26	83	48	60	60	44	42	45	125	59	72	40	73
chr2	120240589	120240900	312	60	30	47	28	33	24	33	81	52	50	98	31	32	52	161	37	87	44	125
chr9	80435139	80435675	537	49	59	48	60	66	32	28	207	112	25	79	38	35	39	34	23	28	30	36
chr17	40624877	40625342	466	31	10	15	23	37	1	10	77	65	12	29	11	16	13	10	11	13	4	2
chr11	15742118	15742317	200	12	13	15	1	18	9	6	17	20	5	18	13	16	16	42	22	24	14	41
chr3	37224859	37225291	433	32	14	28	12	24	22	11	55	148	36	34	11	20	25	14	20	11	11	9
chr11	4115398	4116707	1310	368	314	299	241	220	270	199	607	824	557	660	308	392	314	833	482	585	423	810
chr4	68410751	68411694	944	634	608	580	386	386	418	492	1067	1430	854	1221	645	759	529	1470	924	966	825	1338
chr1	169464257	169464941	685	38	35	48	39	53	23	38	99	200	75	63	46	40	63	38	30	44	20	37
chr10	70459313	70459477	165	10	5	19	10	12	3	3	36	28	14	5	10	1	7	5	2	2	4	6
chr9	108738595	108738887	293	22	12	17	9	10	5	18	18	6	18	34	22	25	15	85	17	40	29	36
chr8	110698237	110698404	168	18	14	20	17	17	11	18	18	43	36	49	48	19	30	21	9	8	7	21
chr6	110509937	110510395	459	84	61	54	103	102	53	58	286	176	51	92	52	55	92	55	26	74	34	50
chr8	74395846	74396601	756	74	38	125	70	92	32	47	150	281	74	111	60	47	69	71	47	43	29	58
chr4	22441057	22441222	166	9	10	9	4	10	4	17	13	7	14	6	24	3	3	4	1	1	2	8
chr4	124561333	124561717	385	26	30	18	12	28	16	21	109	204	41	64	38	20	33	38	22	12	3	14
chr2	157239643	157240086	444	52	24	28	41	30	22	17	58	38	76	70	79	83	77	166	79	77	96	151
chr10	95060200	95060947	748	34	17	32	36	33	28	46	55	28	33	37	41	40	56	158	40	75	73	76
chr7	124637832	124637987	156	8	6	23	6	8	6	9	9	8	8	6	6	4	5	6	3	1	3	2
chr1	168253910	168254269	360	31	36	53	16	48	18	24	76	166	34	44	15	17	45	22	26	20	2	22
chr8	65575764	65576052	289	26	26	21	10	27	8	18	57	63	8	25	21	8	13	17	9	9	11	1
chr6	80215919	80216383	465	22	27	40	29	39	26	19	99	111	25	63	23	6	38	33	14	22	13	8
chr8	15397249	15398529	1281	422	378	313	248	300	256	323	669	709	528	658	260	325	280	761	511	606	400	861
chr11	86099314	86099533	220	28	34	18	10	17	28	18	52	28	25	39	35	51	38	72	42	124	73	32
chr4	88232015	88232351	337	17	7	14	13	16	12	10	22	75	11	13	1	6	3	6	6	6	3	3
chr6	92158833	92159047	215	5	6	1	4	10	4	18	3	9	10	3	1	4	8	1	1	1	2	3
chr13	21900117	21900866	750	114	79	78	97	66	72	86	196	203	139	160	56	139	85	351	105	196	128	247
chr10	101681792	101681965	174	10	11	29	2	8	4	3	21	74	19	28	5	6	8	5	6	1	5	5
chr6	83397632	83397814	183	19	9	13	6	19	4	13	15	18	11	16	8	12	10	43	25	20	15	26
chr11	16441490	16441670	181	6	5	5	19	10	1	10	18	14	7	10	17	4	10	6	2	1	4	5
chr13	59589662	59589828	167	15	6	11	6	10	8	7	12	10	29	5	1	3	9	7	2	3	2	3
chr1	99729549	99730657	1109	255	304	227	248	209	155	143	377	461	314	457	226	333	222	618	318	413	382	569
chr4	168824399	168825052	654	65	115	106	82	103	67	83	206	620	82	112	78	55	113	65	50	53	51	83
chr3	171072302	171072685	384	32	26	37	35	43	14	29	142	73	28	41	34	38	47	31	13	26	24	18
chr7	87563056	87564622	1567	831	984	599	770	563	719	764	1293	1123	1106	1628	784	1178	872	2199	1193	1684	1419	1841
chr18	77526047	77526506	460	20	9	24	10	22	3	11	19	21	24	23	7	12	7	57	30	26	13	39
chr3	142607078	142608223	1146	122	129	84	96	137	90	91	238	316	210	284	116	125	113	321	189	222	151	351
chr13	44118249	44118439	191	31	23	12	15	25	13	15	43	52	16	18	12	16	15	20	11	8	10	7
chr18	67111294	67111457	164	8	7	7	4	18	1	4	4	22	5	15	8	5	6	3	1	4	2	4
chr8	103380142	103380676	535	11	8	11	7	16	2	7	19	69	15	18	7	3	13	7	2	4	1	11
chr3	146246728	146246999	272	49	9	17	5	21	7	12	33	49	27	29	11	11	37	15	12	10	4	8
chr12	94964090	94964254	165	20	14	22	7	22	8	6	49	38	16	22	12	8	10	17	10	5	4	6
chr3	188794143	188794728	586	10	7	4	8	20	11	18	18	13	2	22	40	20	19	136	24	33	61	10
chr7	38488378	38488878	501	84	109	133	86	132	52	80	307	128	102	103	55	51	175	53	44	64	55	81
chr4	9325994	9326245	252	36	4	31	5	50	18	8	41	51	20	24	20	10	16	17	2	6	7	15
chr1	98519096	98520110	1015	187	201	187	189	157	124	102	315	563	266	328	128	191	133	394	304	341	282	426
chr14	74163080	74163888	809	50	35	20	31	38	18	19	97	188	32	41	32	10	26	22	17	20	16	17
chr1	142813054	142813223	170	48	13	21	12	27	10	5	27	28	25	21	24	16	15	24	7	4	1	14
chr5	38556098	38557602	1505	507	452	431	473	420	365	483	1069	1257	1092	1299	287	511	401	1360	1002	961	785	1217
chr6	148466190	148466471	282	24	19	22	7	23	4	15	22	72	21	41	15	13	26	14	11	8	7	15
chr2	129038070	129038916	847	157	90	105	76	110	111	74	190	128	251	275	242	273	181	485	165	438	262	416
chr9	29696703	29697307	605	23	26	46	27	48	19	38	49	134	22	34	13	12	20	14	11	16	8	29
chr19	2529518	2529757	240	23	8	28	10	18	5	14	32	86	30	20	8	15	13	10	13	7	8	5
chr1	192920704	192921603	900	144	181	155	108	212	114	131	407	314	131	262	153	135	138	152	94	117	87	168
chr4	125724992	125725179	188	24	14	21	11	14	19	17	42	48	22	33	27	19	25	21	11	14	10	14
chr4	125784403	125784586	184	20	9	17	13	10	3	10	13	17	10	25	2	9	8	10	8	2	1	4
chr7	22056087	22056562	476	47	14	20	24	17	32	19	50	23	56	74	52	99	56	217	97	93	67	75
chr12	22811063	22811511	449	113	121	104	85	165	102	88	362	241	110	174	114	68	156	109	77	90	67	100
chr4	124416765	124417107	343	33	53	34	26	39	18	21	58	84	24	39	16	21	23	28	22	12	15	17
chr12	44191456	44191812	357	20	25	28	30	36	12	20	57	36	16	27	30	6	10	15	3	14	15	8
chr3	169176286	169176436	151	16	9	5	3	15	3	4	22	24	23	5	10	3	12	7	5	5	1	2
chr2	149310240	149310690	451	20	13	18	9	24	20	18	24	22	24	34	20	47	22	96	54	26	34	48
chr12	114162664	114163100	437	18	11	9	31	25	5	13	22	29	30	19	14	18	4	36	24	30	47	70
chr2	201107217	201107736	520	11	7	12	13	21	15	16	28	10	19	28	29	44	26	128	27	27	70	28
chr11	73999250	73999436	187	16	5	10	2	3	7	4	36	66	11	20	8	6	12	8	3	6	3	2
chr14	50919615	50920453	839	263	299	306	277	314	184	199	864	905	344	324	242	195	380	225	182	257	150	276
chr17	26452554	26452734	181	15	7	4	3	4	3	3	4	26	6	13	2	8	8	2	2	4	1	3
chr1	118142370	118142807	438	100	55	54	79	76	82	83	162	113	66	176	114	142	118	355	105	254	132	208
chr6	134994500	134995163	664	186	112	168	134	170	156	144	419	214	165	296	182	84	208	160	89	116	90	154
chr7	57433017	57433304	288	24	16	27	12	28	21	8	17	29	17	12	9	11	12	13	3	9	10	5
chr2	105050820	105051218	399	35	41	47	31	33	44	21	49	78	65	74	64	93	79	169	83	97	90	116
chr6	25251130	25251487	358	57	40	63	38	59	27	14	212	323	77	86	28	36	44	25	29	38	26	23
chr3	11195897	11196495	599	40	21	27	16	26	15	17	52	38	54	43	14	23	24	39	67	48	36	80
chr12	96021866	96022145	280	31	13	16	5	12	9	9	25	173	18	52	6	17	10	11	6	8	3	11
chr18	894270	894557	288	46	25	21	22	64	30	26	110	46	31	57	66	27	58	28	31	28	10	10
chr6	72289520	72290210	691	33	35	27	15	20	23	20	39	112	20	21	18	21	23	22	21	10	6	14
chr3	83677855	83677992	138	10	9	6	9	6	2	12	10	8	14	3	11	2	11	1	1	3	2	7
chr8	66556444	66557704	1261	1009	1092	924	744	630	762	712	1714	2239	1702	1957	707	934	937	2154	1467	1634	1368	2240
chr11	37410200	37410459	260	10	3	16	3	9	4	23	6	14	14	6	15	4	10	3	3	4	1	6
chr1	239424177	239424545	369	23	49	42	41	53	34	27	147	61	32	43	43	27	58	24	14	37	20	27
chr3	52059613	52059790	178	23	6	13	4	6	4	7	9	9	20	18	5	4	13	25	19	21	13	40
chr12	2348445	2348964	520	35	15	32	36	42	18	13	76	50	31	49	28	14	13	159	27	82	45	48
chr9	29966319	29966558	240	40	25	31	19	27	17	24	26	99	26	38	18	20	36	31	9	14	12	22
chr16	80387608	80387895	288	26	7	7	2	14	5	4	12	7	11	8	5	4	30	25	8	104	3	40
chr7	11415896	11416545	650	56	143	59	83	90	80	75	268	163	68	109	119	85	132	58	65	81	25	65
chr14	24039097	24039309	213	45	11	21	36	34	19	14	66	15	43	58	42	31	74	156	62	113	40	72
chr8	131108612	131109231	620	35	38	55	50	60	49	42	174	216	50	137	64	48	105	59	42	36	29	48
chr13	78476419	78476883	465	51	37	26	20	37	11	24	71	115	28	45	18	24	39	15	19	26	13	23
chr22	22934166	22934331	166	6	8	8	3	9	1	8	5	23	10	10	1	1	9	1	4	1	1	4
chr8	82981131	82981296	166	18	6	19	17	18	3	12	10	12	8	11	1	6	17	7	4	4	4	2
chr6	11619610	11620091	482	39	22	34	7	8	22	19	31	14	36	41	32	24	67	137	32	72	58	67
chr7	113616435	113616803	369	6	14	14	8	23	14	18	16	14	18	24	19	31	10	104	19	13	60	33
chr9	139860381	139860797	417	43	39	24	49	19	17	18	74	35	51	25	33	20	42	14	12	10	11	38
chr2	68870253	68871116	864	57	50	60	49	63	40	48	100	148	118	128	53	72	62	149	122	131	77	115
chr3	137833422	137834754	1333	268	275	253	314	223	142	225	547	532	523	542	169	254	268	783	386	481	409	584
chr4	151017821	151018302	482	21	9	19	10	21	10	15	19	20	34	40	26	40	31	89	37	32	33	61
chr7	114004700	114005288	589	49	16	45	52	87	19	54	109	32	32	81	48	21	36	39	16	22	15	28
chr12	30907232	30908403	1172	1328	1294	1264	984	754	905	939	2081	2767	2309	2371	958	1486	1247	2604	1797	2505	1831	2861
chr6	15371017	15371196	180	21	25	27	26	27	10	16	62	31	23	48	16	16	36	19	4	26	11	9
chr11	43398167	43398534	368	23	38	55	36	45	20	20	113	237	28	52	40	15	42	25	34	21	4	17
chr9	68743630	68743805	176	11	10	19	3	11	8	11	8	20	18	11	9	8	14	5	5	4	3	9
chr8	116588524	116589061	538	52	51	72	46	57	31	71	131	312	51	109	41	33	45	50	36	44	26	32
chr14	24107728	24108539	812	141	78	99	56	140	141	96	242	165	166	233	203	225	201	505	213	362	205	316
chr12	82518626	82518924	299	34	23	40	40	45	13	41	51	72	41	25	51	23	30	6	18	21	12	33
chr5	59628374	59629175	802	95	109	84	108	123	64	97	292	295	87	106	84	75	121	97	53	78	69	69
chr14	24548789	24549491	703	164	150	105	141	103	138	72	246	84	244	253	165	200	210	594	188	362	193	468
chr3	75502184	75503037	854	134	123	143	126	48	130	54	218	124	156	305	160	245	187	536	250	263	278	332
chr2	182548193	182549299	1107	351	338	205	306	230	169	191	579	376	568	762	309	267	294	784	409	629	434	813
chr17	21554158	21554365	208	57	32	45	18	53	17	28	64	58	40	46	19	10	46	17	13	14	9	42
chr12	11323565	11324701	1137	553	611	511	411	416	405	419	1144	1269	986	936	492	507	574	1211	751	953	760	1259
chr10	122738687	122739549	863	44	52	39	32	80	30	48	119	120	107	145	43	77	56	195	102	132	102	90
chr22	25969254	25969469	216	13	8	9	25	35	4	8	55	19	20	12	10	6	20	11	4	5	4	10
chr11	9023378	9023619	242	9	14	19	6	11	7	6	39	182	15	24	9	13	19	12	6	8	2	7
chr11	10255212	10255441	230	28	13	44	14	17	5	15	59	51	33	23	16	24	17	20	15	10	4	14
chr1	180895454	180896145	692	110	54	68	68	84	56	71	173	76	112	169	125	105	118	363	131	161	117	193
chr8	63997980	63999138	1159	159	129	105	115	109	115	76	275	417	380	332	137	294	137	542	354	365	258	303
chr10	38691177	38692491	1315	825	599	610	552	451	491	564	1158	1678	1146	1222	516	662	652	1287	991	1412	917	1438
chr5	81770	82073	304	20	9	10	5	25	3	10	20	24	13	31	8	26	22	52	23	44	27	27
chr4	64882524	64882860	337	24	20	10	22	25	8	14	13	20	21	16	10	16	22	21	8	8	2	4
chr20	18522375	18522738	364	51	58	40	46	38	45	44	150	149	49	54	32	48	74	37	31	36	19	53
chr5	2387847	2388739	893	79	63	96	52	72	54	62	112	116	98	133	90	67	66	228	102	130	98	125
chr7	141787531	141788183	653	34	71	67	32	40	19	1	70	82	31	108	65	74	69	214	95	93	105	155
chr4	92542326	92543052	727	30	57	81	28	54	19	34	69	118	31	33	32	13	57	23	12	39	15	18
chr1	94003401	94003984	584	42	40	43	46	39	17	23	110	85	26	30	19	27	26	29	12	19	17	29
chr14	69612992	69613199	208	19	12	10	26	29	9	7	61	10	7	19	9	2	8	6	5	6	6	3
chr1	155960904	155961356	453	35	6	27	4	15	15	14	17	89	21	33	15	6	21	15	3	2	10	11
chr4	87955796	87956060	265	33	43	55	71	75	30	35	110	73	54	60	62	41	61	59	19	34	21	44
chr7	24330	24487	158	28	12	26	12	10	6	6	18	8	4	6	36	6	6	6	1	4	6	4
chr10	61414905	61415614	710	53	28	37	69	58	18	48	123	61	46	69	48	20	46	53	12	27	16	35
chr2	100064972	100065353	382	39	28	35	23	55	28	38	108	71	30	60	50	25	60	29	19	40	16	26
chr3	161336438	161336619	182	30	9	13	5	13	4	5	7	15	9	9	2	3	12	1	3	4	2	6
chr16	32442686	32442826	141	8	10	9	1	9	1	5	3	11	8	13	12	1	10	4	2	4	1	1
chr10	1281087	1281512	426	36	34	23	15	21	20	27	70	47	49	48	14	22	37	94	30	99	34	66
chr2	229044973	229045380	408	14	19	25	16	22	16	20	30	37	16	55	4	23	17	75	28	33	38	56
chr7	134050528	134050690	163	12	18	22	17	15	4	9	24	93	27	28	6	15	1	8	10	6	1	8
chr6	152406806	152407134	329	30	35	49	22	39	26	27	55	114	35	43	29	17	25	29	18	30	15	15
chr10	26156319	26156918	600	43	19	16	22	31	30	24	64	85	42	27	36	39	34	33	16	24	11	21
chr4	178997252	178997880	629	54	38	61	56	129	20	37	167	58	48	78	81	43	77	56	28	23	30	39
chr11	6255616	6256639	1024	1381	1467	1293	898	753	840	839	1871	3106	2029	2306	1157	1576	1296	2689	1934	2585	1675	2804
chr4	89533283	89533839	557	82	96	118	59	84	68	71	245	314	93	149	63	54	89	90	70	55	46	72
chr13	49757790	49758401	612	19	20	34	15	37	18	13	77	244	34	41	26	13	37	32	14	16	9	7
chr3	75628472	75629782	1311	222	276	184	180	90	186	132	362	691	277	520	175	232	205	560	387	394	375	575
chr2	224700558	224700761	204	23	27	31	24	20	13	12	43	101	29	38	22	14	35	22	20	11	5	21
chr21	45172597	45172900	304	32	18	14	8	22	20	7	40	4	19	32	25	15	43	66	21	84	48	54
chr7	38792851	38793384	534	45	28	24	49	44	27	25	63	60	40	71	30	32	42	53	7	15	25	22
chr9	4704171	4704434	264	19	14	15	25	30	11	14	95	44	4	25	11	13	9	10	4	4	8	16
chr6	121078854	121079123	270	15	3	9	7	7	5	7	10	18	3	13	8	5	7	16	6	12	48	18
chr6	6835065	6835486	422	32	24	25	32	31	20	24	40	40	29	58	22	22	16	96	53	31	57	45
chr18	702598	703879	1282	210	249	231	227	235	135	195	586	553	211	344	208	219	207	235	178	174	152	196
chr14	78447098	78447730	633	175	130	184	104	115	146	86	281	291	312	371	151	233	162	477	300	376	185	351
chr3	134575254	134575447	194	12	10	10	2	9	6	18	4	8	9	8	5	6	13	5	3	2	4	2
chr11	8114243	8114459	217	35	33	38	24	32	29	27	55	103	44	77	32	37	33	120	46	78	38	89
chr17	71451402	71451858	457	46	37	37	30	48	24	29	106	53	56	93	50	70	68	143	49	171	77	76
chr4	26807986	26808308	323	33	39	27	13	37	24	21	124	79	17	39	17	12	27	16	22	19	7	13
chr6	143156250	143156380	131	32	18	12	35	32	17	12	97	33	27	27	30	35	53	18	15	20	8	17
chr6	105307086	105308250	1165	586	543	463	371	364	449	463	946	1305	952	1181	542	924	585	1610	872	1091	821	1361
chr5	32124213	32124378	166	13	6	7	7	5	5	9	21	9	13	20	16	15	7	34	10	29	22	24
chr21	14377916	14378150	235	29	17	15	5	17	6	10	17	14	10	10	4	7	18	6	4	6	1	10
chr6	53774691	53774920	230	30	15	26	14	21	19	10	56	30	25	19	16	20	26	22	13	10	10	9
chr2	1608818	1609270	453	32	10	31	23	28	27	14	65	52	33	61	35	36	28	78	49	89	33	66
chr1	98511632	98512041	410	31	19	21	12	28	19	21	48	75	41	29	20	25	23	106	38	26	43	68
chr22	47092070	47092387	318	25	13	11	9	17	1	7	28	15	17	20	10	5	10	40	23	29	14	35
chr1	20084947	20085184	238	32	15	14	10	27	13	7	54	47	36	18	17	12	25	11	9	13	2	20
chr2	180615929	180616124	196	10	21	24	12	12	15	18	46	41	21	48	23	13	24	25	11	6	11	9
chr22	44733412	44733724	313	30	12	15	9	24	7	7	25	20	17	23	7	12	11	43	41	21	14	45
chr4	8051900	8052999	1100	136	95	104	115	109	85	84	290	147	158	200	137	130	129	449	141	216	177	221
chr1	178622251	178622630	380	31	47	46	29	22	22	18	61	199	30	77	13	18	25	24	11	23	10	26
chr15	46211856	46212046	191	4	5	13	2	25	3	5	5	10	14	6	5	6	4	1	3	5	1	1
chr4	58534147	58534294	148	6	5	15	7	17	1	5	11	7	16	20	15	4	3	6	3	1	3	4
chr14	24846800	24847189	390	55	33	40	31	35	18	17	39	28	61	72	63	69	50	119	88	98	70	83
chr20	13864164	13864432	269	13	2	14	8	23	9	8	34	10	25	20	48	53	18	96	30	99	21	76
chr10	23002135	23004175	2041	248	210	177	186	209	143	168	467	626	563	517	165	272	217	643	540	547	291	427
chr11	41425618	41426454	837	140	103	131	86	217	105	142	324	129	110	270	241	200	236	138	104	106	72	79
chr2	24925756	24925982	227	18	9	13	7	15	14	6	44	103	12	27	6	18	9	7	7	4	9	8
chr2	183764774	183765162	389	30	19	22	19	25	8	19	53	76	29	41	18	15	28	20	19	8	10	21
chr5	167865356	167865522	167	18	17	14	11	7	10	9	40	34	11	17	14	10	23	1	5	15	6	8
chr13	46189580	46190240	661	103	68	70	30	62	24	56	121	67	108	120	80	109	59	175	126	141	96	189
chr11	60791170	60791638	469	50	28	31	15	23	18	15	32	28	19	46	21	29	29	81	40	56	25	79
chr18	67931634	67932208	575	19	19	27	29	31	29	22	39	17	42	92	109	37	31	18	13	22	12	18
chr5	103078808	103079220	413	38	29	44	29	88	19	35	135	50	21	54	44	12	44	35	10	14	23	23
chr7	143462978	143463207	230	3	8	1	3	5	1	3	1	3	4	8	1	1	4	22	1	6	7	18
chr1	237068338	237069051	714	80	63	90	57	77	52	81	275	267	55	130	90	53	99	97	51	56	44	48
chr14	60363118	60363269	152	8	5	11	2	11	11	2	6	17	9	1	4	2	5	3	4	1	1	1
chr3	160637813	160638031	219	31	22	13	19	18	8	8	33	28	16	27	14	17	25	46	27	35	26	58
chr14	56104308	56104787	480	29	18	36	26	80	26	40	165	25	38	40	43	28	32	10	18	24	16	23
chr12	75602849	75603650	802	91	92	56	81	85	49	53	149	155	111	153	101	191	69	268	127	137	231	215
chr6	147516066	147516725	660	64	39	51	62	54	17	38	133	348	43	79	64	47	53	60	27	22	20	48
chr12	50267198	50267343	146	9	13	13	1	11	6	3	15	4	5	20	27	13	6	54	14	27	24	27
chr15	81198810	81198997	188	20	7	13	10	8	8	8	16	11	10	37	16	18	12	40	22	50	13	29
chr14	70294324	70294620	297	28	41	33	35	22	12	20	90	146	32	29	10	20	35	13	23	12	15	15
chr2	111919511	111919909	399	60	47	29	45	55	64	47	84	80	79	126	59	126	35	277	75	106	117	166
chr5	100173840	100174091	252	14	21	35	24	18	18	18	40	33	26	45	29	20	44	15	17	17	14	12
chr3	35680632	35681604	973	100	65	63	60	77	42	59	107	170	132	132	61	81	90	211	97	108	104	210
chr18	65398191	65398460	270	16	39	44	42	38	17	26	60	157	45	18	28	32	35	14	22	26	7	24
chr3	11887781	11888688	908	238	283	257	223	234	169	198	536	568	371	496	252	291	292	624	334	473	352	495
chr12	111284710	111284984	275	5	7	16	10	11	11	6	18	24	16	26	5	13	16	33	30	40	11	22
chr10	6824621	6824806	186	11	5	12	1	8	9	3	6	7	10	9	6	1	21	6	3	2	1	1
chr10	68855264	68855584	321	24	27	35	32	76	31	44	85	30	35	36	44	20	53	22	9	22	11	39
chr18	73092794	73093193	400	17	7	5	1	8	2	12	12	16	7	17	2	14	16	41	11	11	10	66
chr9	110331552	110331826	275	22	7	18	4	17	8	8	22	62	16	18	7	6	10	13	2	5	3	10
chr1	110692999	110693951	953	210	237	121	203	178	122	114	544	377	408	307	121	117	142	396	382	511	227	549
chr5	159860842	159861487	646	148	100	131	104	96	151	118	210	114	176	260	187	296	172	497	232	356	285	337
chr9	16154422	16155088	667	196	145	141	112	113	70	83	184	239	237	276	208	304	195	437	219	395	253	387
chr8	17975852	17976063	212	7	14	15	17	30	6	7	49	46	7	20	14	15	26	3	10	1	5	16
chr13	107187492	107189039	1548	856	696	745	813	676	711	757	1508	2096	1775	1588	584	871	681	1842	1490	1603	1309	1964
chr11	69262702	69262837	136	14	11	18	3	12	18	13	17	19	36	22	21	18	29	55	29	64	20	37
chr15	86185338	86185536	199	19	13	10	25	50	2	13	37	53	16	15	20	3	13	15	7	4	6	6
chr1	92051506	92051919	414	61	25	58	32	65	52	44	129	63	97	144	119	84	96	331	69	167	76	230
chr1	220921202	220922337	1136	301	265	255	190	226	187	190	671	767	523	614	260	269	255	727	440	448	419	647
chr8	97571053	97571673	621	32	20	40	46	100	30	37	189	152	39	54	43	28	48	43	6	17	30	34
chr3	185118175	185118426	252	20	13	17	7	40	14	12	98	86	15	46	24	8	18	13	15	5	9	12
chr4	143854167	143854648	482	61	47	47	43	60	61	34	97	106	46	122	91	59	111	235	80	105	91	184
chr3	131158427	131158640	214	10	4	8	3	4	7	10	7	6	4	6	8	12	5	37	6	10	31	11
chr1	182580968	182581398	431	71	50	38	24	57	22	19	102	52	61	129	82	36	56	151	77	116	64	146
chr12	43913217	43913370	154	18	3	6	5	30	2	6	15	9	11	10	8	4	14	7	3	1	2	5
chr9	128913442	128913605	164	8	2	6	11	15	7	7	5	8	4	15	12	12	4	25	13	24	18	24
chr13	73912575	73912817	243	10	12	13	3	9	8	15	24	90	19	24	6	4	11	4	11	2	1	8
chr1	38922220	38922616	397	20	11	15	6	27	8	6	20	17	12	33	11	9	5	74	26	29	8	35
[truncated: 152,439 more rows]
