# Supplementary material for: Type 2 Diabetes–Associated Genetic Variants Regulate Chromatin Accessibility in Human Islets
Source: Oxford University Press journal article supplement (doi:10.2337/db18-0393), 2018-09-04
Supplement: db180393supplementarytable8.xlsx [file db180393supplementarytable8.xlsx]

## Sheet: Table_S7
Table S7: Statistically Significant caQTLs
rsID	Feature_Coordinates	Chromosome	SNP_Position	Ref	Alt	AlelleFreq	HWE_ChiSq	IA	Log10_BH	ChiSq_Statistic	EffectSize	Delta	Phi	Overdispersion	SNP_ID	Num_fSNPs	Num_testedSNPs	LogLike_Null	ConvergenenceStatus	SqCor_fSNPs	SqCor_rSNPs	PValue	Bonferroni_Corrected_Pvalue_10._FDR_Cutoff_0.02276441.	Associated_gene	DistanceToAssociatedGene	ChromHMM_Islets	FOXA2_ChIP	NKX6.1_ChIP	H3K4me1_ChIP	CTCF_ChIP	H2A.Z_ChIP	H3K27ac_ChIP	PDX1_ChIP	MAFB_ChIP	HaploReg_Prediction_Best
rs9274652	6:32636138-32636402	6	32636235	C	T	0.289474	0.43618	0.990341	0.990341	119.207	0.110764	0.002788	0.379683	3.67676	3.05852	23	21	13.0193	0	0.945687	0.901156	9.43e-28	1.98e-26	ENSG00000179344	22	17_Weak_repressed_polycomb	0	0	0	0	0	0	0	0	NF-kappaB_known5|0|-11.966195379144|10|+|13.649895641312|1.68370026216799
rs6547757	2:88469578-88470466	2	88469770	G	C	0.815789	0.968783	0.97267	0.97267	86.0079	0.847815	0.002874	0.535165	26.6407	4.43316	6	7	27.6554	0	0.988809	0.954547	1.79e-20	1.25e-19	ENSG00000144115	-258	10_Active_enhancer_2	0	0	0	0	1	1	0	0	RXRA_known6|0|2.48651471524801|9|-|9.45991908779599|11.946433803044
rs2517198	8:17465473-17466680	8	17465824	C	T	0.736842	0.139592	1	1	81.4073	0.796643	0.000726	0.556546	8.21092	5.02211	22	16	21.2059	0	0.983474	0.850832	1.84e-19	2.94e-18	ENSG00000104213	31302	10_Active_enhancer_2	1	0	0	0	1	1	1	0	Ets_known1|0|11.966125495914|6|-|0.182593670635995|12.14871916655
rs6838211	4:178643909-178644842	4	178644629	A	C	0.342105	1.5558	0.999883	0.999883	78.1189	0.188348	1.8e-05	0.462199	16.4395	4.15249	5	4	27.8425	0	0.995858	0.993223	9.7e-19	3.88e-18	ENSG00000221499	-178191	18_Quiescent/low_signal	1	1	0	0	1	1	0	0	Irf_known2|0|-11.966250404806|5|+|-0.877337392469997|-12.843587797276
rs370140	9:10208009-10209073	9	10208378	G	T	0.684211	0.012492	0.851859	0.851859	80.0691	0.878851	0.009337	0.422285	5.33729	4.25299	15	13	22.2114	0	0.902845	0.765931	3.62e-19	4.7e-18	ENSG00000234360	-324137	18_Quiescent/low_signal	0	0	0	0	1	1	0	0	NA
rs565888125	6:29920775-29921237	6	29920909	G	A	0.684211	4.04734	0.937237	0.937237	69.8587	0.203509	0.000953	0.417965	6.76567	3.11557	35	39	10.8016	0	0.890586	0.689032	6.37e-17	2.48e-15	ENSG00000235290	-3599	6_Weak_transcription	0	0	0	0	0	0	0	0	NA
rs10031494	4:180336265-180337322	4	180337189	A	C	0.157895	0.824653	1	1	65.3077	0.183037	0.000892	0.560099	10.5289	5.48398	10	10	12.2829	0	0.986428	0.99379	6.41e-16	6.41e-15	ENSG00000212191	-729155	18_Quiescent/low_signal	1	1	1	0	0	1	1	1	RORalpha1_2|0|-11.966163314524|6|-|7.83667111520101|-4.12949219932301
rs34726826	13:25592078-25593202	13	25592320	C	CA	0.526316	4.33716	0.957394	0.957394	65.7127	0.234664	0.004972	0.540085	11.6143	5.25472	14	15	0.717317	0	0.927102	0.781828	5.22e-16	7.83e-15	ENSG00000162685	536	10_Active_enhancer_2	0	0	0	0	1	0	0	0	AP-2_known1|0|-2.66267504439301|4|+|2.00560711803601|-0.657067926357001
rs66842526	10:38382733-38384030	10	38383280	CT	C	0.552632	0.033543	0.970124	0.970124	62.484	0.66555	0.010294	0.35399	12.2881	6.30147	24	21	1.22957	0	0.953454	0.832828	2.69e-15	5.64e-14	ENSG00000075407	-532	1_Active_TSS	1	0	0	0	1	1	1	1	BCL_disc1|0|20.504791673688|8|-|-8.48208689294|12.022704780748
rs9526950	13:53173753-53174768	13	53174463	C	A	0.289474	3.15363	0.983754	0.983754	56.6896	0.192538	1.2e-05	0.415116	21.2846	4.90204	5	5	28.9076	0	0.977399	0.960868	5.1e-14	2.55e-13	ENSG00000139675	-17853	1_Active_TSS	0	0	0	0	1	1	0	0	ZBTB33_disc3|0|-11.785561493632|9|+|4.670291033829|-7.115270459803
rs36038042	5:81661528-81662195	5	81661747	C	T	0.210526	1.35111	0.999842	0.999842	52.0991	0.26704	0.000992	0.51	10.8765	5.27846	6	3	16.7073	0	0.993384	0.99155	5.28e-13	1.58e-12	ENSG00000205464	86246	10_Active_enhancer_2	1	1	1	0	1	1	0	0	NA
rs12868817	13:94106806-94107740	13	94106946	C	T	0.263158	2.42347	1	1	54.4448	0.822415	0.00732	0.459563	7.25766	4.35955	12	12	6.95979	0	0.990203	0.99173	1.6e-13	1.92e-12	ENSG00000235784	-58698	18_Quiescent/low_signal	0	0	0	1	0	1	0	0	NA
rs13098957	3:184208656-184209275	3	184209194	C	A	0.421053	1.65857	0.999138	0.999138	53.3585	0.791484	1.7e-05	0.51536	6.66591	4.48316	7	7	3.93521	0	0.994096	0.993376	2.78e-13	1.95e-12	ENSG00000227793	9115	2_Weak_TSS	0	0	0	1	0	0	0	0	GATA_known7|0|8.955941574855|6|-|0.248134800995004|9.20407637585
rs71512848	8:636977-638545	8	638337	C	G	0.263158	2.42347	0.938686	0.938686	52.3417	0.298416	0.000368	0.617768	13.832	5.71454	9	6	28.6701	0	0.966085	0.870012	4.66e-13	2.8e-12	ENSG00000206100	-27015	2_Weak_TSS	1	1	0	0	1	1	0	1	NA
rs201685439	17:19091096-19091682	17	19091445	C	T	0.078947	0.139592	0.71897	0.71897	53.6718	0.233007	0.001084	0.558399	9.90034	4.18539	18	12	30.9447	0	0.755785	0.582081	2.37e-13	2.84e-12	ENSG00000202364	-234	18_Quiescent/low_signal	0	0	0	0	0	1	1	1	CHD2_disc2|0|-11.9661613953|7|-|12.4234370745|0.457275679199995
rs1466992	4:48175501-48175895	4	48175876	C	G	0.394737	0.85067	0.992926	0.992926	49.6713	0.212016	0.002061	0.435892	5.27034	4.07594	6	5	8.82453	0	0.986694	0.984951	1.82e-12	9.09e-12	ENSG00000202014	20049	10_Active_enhancer_2	0	0	0	0	1	0	0	0	Zfp410|0|-0.596833226177992|16|-|13.111884543006|12.515051316828
rs341324	5:111827970-111828567	5	111827971	A	G	0.473684	4.33716	0.999789	0.999789	49.5076	0.777913	0.003337	0.497329	18.9219	4.7931	6	5	14.6219	0	0.926521	0.804395	1.98e-12	9.88e-12	ENSG00000231893	72689	18_Quiescent/low_signal	0	1	0	1	0	0	0	0	Foxj1_1|0|1.177253601304|3|+|7.834999310661|9.01225291196501
rs12970289	18:75088011-75088655	18	75088258	T	G	0.184211	0.968783	0.999475	0.999475	49.0026	0.129949	0.001082	0.573043	9.00822	4.14754	4	4	32.8786	0	0.983579	0.988837	2.56e-12	1.02e-11	ENSG00000199392	55634	10_Active_enhancer_2	1	0	0	0	1	1	0	0	BDP1_disc1|0|-0.995836295508013|21|+|-0.638554863345973|-1.63439115885399
rs1188461	1:31158061-31158686	1	31158440	C	G	0.289474	0.43618	0.999744	0.999744	48.859	0.688694	0.001574	0.541029	23.4615	5.14723	5	5	11.7587	0	0.994392	0.993983	2.75e-12	1.38e-11	ENSG00000186056	-32880	1_Active_TSS	0	0	0	1	1	1	0	0	Mxi1_disc1|0|3.50765748228001|9|-|5.81787852161499|9.325536003895
rs9694326	8:125878779-125879100	8	125878998	A	G	0.289474	0.43618	1	1	47.0207	0.21027	4.7e-05	0.509817	11.4404	3.36747	2	2	17.707	0	0.99459	0.991813	7.02e-12	1.4e-11	ENSG00000235517	-1072	18_Quiescent/low_signal	0	0	0	0	0	0	0	0	TFE|0|-11.966146051056|3|+|12.647583986544|0.681437935487999
rs4130070	2:180197490-180198105	2	180197872	T	C	0.210526	0.0475	0.992065	0.992065	46.9687	0.203945	0.004697	0.485289	15.9889	4.07769	2	2	5.43649	0	0.99281	0.987206	7.21e-12	1.44e-11	ENSG00000237477	58931	18_Quiescent/low_signal	1	1	0	0	1	0	1	1	Foxa_disc1|0|-11.949644787118|8|-|11.802771313032|-0.146873474086007
rs2305132	2:113956181-113957117	2	113956941	T	A	0.131579	1.81521	1	1	48.1766	0.160595	0.001496	0.516251	15.4132	5.81526	7	5	34.0734	0	0.985047	0.862167	3.9e-12	1.95e-11	ENSG00000189223	-12919	10_Active_enhancer_2	0	0	0	1	1	1	0	0	Ahr::Arnt::HIF1|0|-11.966163833232|5|+|11.070108039152|-0.896055794079999
rs11605386	11:18433699-18434076	11	18433720	C	G	0.157895	0.667969	0.998814	0.998814	47.0089	0.778734	0.003582	0.5028	11.0741	4.02496	4	4	7.69332	0	0.969436	0.988585	7.07e-12	2.83e-11	ENSG00000166796	-155	2_Weak_TSS	0	0	0	0	1	0	0	0	NA
rs7811930	7:32128075-32128671	7	32128235	G	C	0.552632	0.554724	1	1	48.1375	0.760302	0.005968	0.548467	12.7097	4.01639	7	8	4.27334	0	0.993054	0.986393	3.97e-12	3.18e-11	ENSG00000236460	147200	17_Weak_repressed_polycomb	0	1	0	0	0	0	0	0	Roaz_1|0|11.96617970008|5|+|-12.94565415967|-0.979474459590023
rs495647	5:111083834-111084484	5	111084169	C	A	0.131579	0.43618	1	1	45.3582	0.219394	0.002107	0.635855	11.3668	5.00675	5	5	17.5953	0	0.987367	0.989645	1.64e-11	8.21e-11	ENSG00000244333	-28076	10_Active_enhancer_2	0	0	0	0	1	1	1	0	Bach1|0|-10.56055611065|8|-|7.85290840582|-2.70764770482999
rs10098938	8:108784054-108784666	8	108784284	A	C	0.842105	0.667969	1	1	44.2918	0.771632	5e-06	0.56975	16.9035	5.04441	5	3	12.1745	0	0.990247	0.990796	2.83e-11	8.49e-11	ENSG00000200806	-112669	18_Quiescent/low_signal	1	1	0	0	0	0	1	0	STAT_disc4|0|11.966090262336|5|+|4.318369567296|16.284459829632
rs216571	18:54047967-54048184	18	54048128	G	A	0.5	2.57895	0.907732	0.907732	43.9161	0.794576	3.8e-05	0.493241	11.9543	2.97171	3	3	20.6156	0	0.85949	0.777014	3.43e-11	1.03e-10	ENSG00000206129	-189474	18_Quiescent/low_signal	0	0	0	0	0	0	0	0	Foxc1_1|0|11.77353297596|4|-|-3.77786415338601|7.995668822574
rs5853276	3:146186280-146187870	3	146187575	A	C	0.342105	1.5558	0.989137	0.989137	45.7866	0.694031	0.004151	0.699361	22.0838	6.54655	8	8	-1e-06	0	0.9321	0.616956	1.32e-11	1.05e-10	ENSG00000163746	27498	10_Active_enhancer_2	0	0	0	0	1	1	1	0	NA
rs261361	20:5037489-5037894	20	5037579	T	C	0.315789	4.04734	0.998302	0.998302	44.8093	0.244237	6.8e-05	0.519963	23.6993	2.82065	5	5	6.97939	0	0.946417	0.984165	2.17e-11	1.09e-10	ENSG00000212536	41633	18_Quiescent/low_signal	0	0	0	0	0	0	0	0	NA
rs12636296	3:125709020-125709642	3	125709050	G	T	0.131579	0.43618	0.988985	0.988985	44.6656	0.147851	0.001408	0.549536	12.0081	4.55783	6	6	17.0597	0	0.979245	0.962433	2.34e-11	1.4e-10	ENSG00000114547	20991	1_Active_TSS	0	0	0	0	1	1	0	0	NA
rs543	10:3178581-3179208	10	3178865	G	A	0.131579	0.43618	1	1	45.8507	0.267473	0.003519	0.440435	7.41997	4.44453	12	13	16.2747	0	0.984349	0.988424	1.28e-11	1.66e-10	ENSG00000237399	-5284	10_Active_enhancer_2	1	1	1	0	0	1	1	1	Foxa_disc2|0|-11.255840055616|7|+|5.825281047236|-5.43055900837999
rs13438829	8:18144769-18145258	8	18144867	T	A	0.289474	0.43618	0.968616	0.968616	42.6385	0.216092	0.002134	0.368068	23.9412	3.90492	5	3	2.35269	0	0.949772	0.949198	6.59e-11	1.98e-10	ENSG00000241195	24565	18_Quiescent/low_signal	1	0	0	0	0	1	1	0	SIX5_disc3|0|-11.96602377565|9|+|-9.33157193207501|-21.297595707725
rs6828109	4:167321378-167322259	4	167321645	G	A	0.131579	0.43618	1	1	44.025	0.302181	0.00231	0.479437	19.4018	5.25601	8	8	10.024	0	0.990749	0.986837	3.24e-11	2.59e-10	ENSG00000206711	-87192	10_Active_enhancer_2	1	1	0	0	1	1	0	1	Znf143_known1|0|-8.64761219437702|13|+|9.05427699140199|0.406664797024973
rs79553670	12:126467684-126468524	12	126467949	C	T	0.131579	1.81521	0.99862	0.99862	42.716	0.20086	0.004736	0.497659	5.03321	4.54413	8	8	11.4668	0	0.907316	0.84121	6.33e-11	5.06e-10	ENSG00000214043	-459344	1_Active_TSS	1	0	0	0	1	1	0	0	ELF1_disc2|0|-11.62459976965|4|-|10.77322749737|-0.851372272279988
rs4666922	2:184377921-184378594	2	184378182	G	A	0.210526	1.35111	0.999684	0.999684	40.7403	0.153367	2.7e-05	0.572923	7.92867	3.81439	3	3	12.7639	0	0.992766	0.989153	1.74e-10	5.22e-10	ENSG00000177855	94929	18_Quiescent/low_signal	1	1	0	0	0	1	0	0	Mef2_known5|0|-6.33978603081499|8|+|0.379632218278999|-5.96015381253599
rs2049967	6:25670354-25671014	6	25670825	C	T	0.263158	2.42347	0.99731	0.99731	40.6909	0.662111	2e-05	0.470713	33.0566	5.75909	3	3	11.177	0	0.958068	0.988921	1.78e-10	5.35e-10	ENSG00000217408	9286	10_Active_enhancer_2	1	1	0	0	0	1	1	1	FXR_3|0|11.966073885477|10|-|-6.37637717044102|5.58969671503598
rs10228891	7:14753964-14754366	7	14754271	T	C	0.473684	4.33716	1	1	40.6878	0.222746	5.8e-05	0.522275	10.4589	3.30354	3	3	13.7101	0	0.992059	0.986614	1.79e-10	5.36e-10	ENSG00000221428	-61068	18_Quiescent/low_signal	0	0	0	0	0	0	0	0	HNF1_3|0|-6.16409791894401|5|-|8.96155261629202|2.79745469734802
rs9294281	6:84533937-84534543	6	84534229	T	C	0.131579	0.43618	1	1	40.6022	0.145609	1.3e-05	0.57601	18.2864	4.47461	2	4	18.5503	0	0.99216	0.989742	1.87e-10	7.46e-10	ENSG00000203877	-29049	17_Weak_repressed_polycomb	1	0	0	0	1	0	0	0	AP-1_known2|0|-11.796225515426|3|-|12.097052|0.300826484574003
rs555754632	6:29855148-29856520	6	29855861	A	-	0.315789	0.012492	0.725504	0.725504	44.6982	0.134838	0.009573	0.421007	1.96778	5.23484	36	40	5.91299	0	0.909857	0.219927	2.3e-11	9.19e-10	ENSG00000206341	-203	1_Active_TSS	0	0	0	1	1	1	0	0	NA
rs2669149	10:16933401-16934273	10	16934170	C	T	0.447368	0.033543	0.999787	0.999787	42.1901	0.692125	0.000903	0.529293	11.7377	4.99098	13	14	0	0	0.974725	0.995894	8.28e-11	1.16e-09	ENSG00000148484	-73874	10_Active_enhancer_2	0	1	0	1	0	0	1	0	Sox_2|0|1.400691378944|16|-|12.886295863026|14.28698724197
rs7031406	9:6931752-6932316	9	6932013	A	G	0.526316	1.35111	1	1	41.7142	0.254702	0.000668	0.421393	11.5038	5.09193	12	12	1.85491	0	0.938224	0.994537	1.06e-10	1.27e-09	ENSG00000224972	29081	10_Active_enhancer_2	1	0	0	0	0	0	0	0	AP-1_disc3|0|-11.96616527103|4|+|10.198326700682|-1.767838570348
rs6534988	4:134808541-134809413	4	134808780	T	A	0.736842	0.655306	1	1	39.8928	0.810244	0.012324	0.479807	16.0466	4.19931	5	6	3.53067	0	0.991993	0.993854	2.68e-10	1.61e-09	ENSG00000240880	98542	18_Quiescent/low_signal	0	0	0	0	1	0	0	0	Nkx2_7|0|11.966143143696|4|-|0.511591856303994|12.477735
rs1035491	5:63961742-63962231	5	63962177	A	G	0.526316	0.058642	0.999894	0.999894	39.8002	0.322452	2.8e-05	0.534976	19.0168	3.58547	6	6	13.5036	0	0.963219	0.995486	2.81e-10	1.69e-09	ENSG00000224296	-9101	6_Weak_transcription	0	0	0	0	0	0	0	0	DMRT7|0|-1.66166310501001|4|-|11.520083754359|9.858420649349
rs9450841	6:88654094-88654923	6	88654559	A	T	0.157895	0.667969	1	1	38.4264	0.280671	0.001298	0.549948	24.6919	5.4374	3	3	7.19155	0	0.994145	0.990801	5.69e-10	1.71e-09	ENSG00000211983	-96744	10_Active_enhancer_2	1	0	1	1	1	1	1	0	Sin3Ak-20_disc1|0|-5.47447978271899|3|-|6.723195514629|1.24871573191001
rs5769127	22:47133558-47135331	22	47135272	G	A	0.421053	0.120222	0.999569	0.999569	40.0644	0.33084	0.016596	0.3157	21.4335	5.32346	10	7	19.2481	0	0.878352	0.994792	2.46e-10	1.72e-09	ENSG00000100422	600	1_Active_TSS	0	0	0	1	1	0	0	0	AP-1_disc3|0|-11.96616527103|3|+|10.148757337094|-1.817407933936
rs9968314	4:165674800-165675542	4	165675229	A	T	0.447368	0.033543	1	1	40.6735	0.27832	1.6e-05	0.63244	13.364	3.86138	8	11	23.6637	0	0.988641	0.995152	1.8e-10	1.98e-09	ENSG00000201050	-33643	18_Quiescent/low_signal	1	0	0	0	0	0	0	0	NA
rs4834371	4:114899775-114901290	4	114900924	G	C	0.368421	0.325822	0.996293	0.996293	38.2846	0.373253	0.000885	0.495924	23.6479	5.36017	7	5	12.3854	0	0.993161	0.991789	6.11e-10	3.06e-09	ENSG00000180801	1103	1_Active_TSS	0	0	0	0	1	1	0	0	PLAG1|0|-11.88381523392|4|+|6.37236204612|-5.51145318779999
rs2108670	7:10914531-10915005	7	10914886	C	T	0.578947	0.353306	0.97411	0.97411	37.253	0.796051	3.3e-05	0.542318	15.6843	3.93412	3	3	0.060647	0	0.98325	0.966243	1.04e-09	3.11e-09	ENSG00000201774	-27075	18_Quiescent/low_signal	1	1	0	0	0	0	0	0	NA
rs73704836	7:79090858-79091944	7	79091227	G	C	0.105263	0.262976	0.999721	0.999721	37.1362	0.171765	0.000806	0.494812	22.877	4.60775	5	3	23.3342	0	0.996221	0.986936	1.1e-09	3.3e-09	ENSG00000187391	-7968	10_Active_enhancer_2	1	0	0	0	0	0	0	0	Nrf-2_2|0|-11.966075338642|4|+|12.296561340744|0.330486002102006
rs57872448	8:141807101-141807466	8	141807240	T	G	0.526316	0.058642	0.994531	0.994531	35.95	0.14238	0.000179	0.378068	15.3972	3.53652	1	2	0	0	0.989737	0.989737	2.02e-09	4.05e-09	ENSG00000207792	-64349	6_Weak_transcription	0	0	0	0	0	0	0	0	AP-1_disc3|0|-10.949993317476|9|+|14.736845240415|3.78685192293901
rs72748702	15:84915005-84915627	15	84915246	A	G	0.184211	0.294145	0.979415	0.979415	38.6463	0.183658	0.001872	0.418651	9.74125	4.02618	9	8	12.5453	0	0.885665	0.976525	5.08e-10	4.06e-09	ENSG00000184206	10479	18_Quiescent/low_signal	0	0	0	1	1	0	0	0	Brachyury_2|0|-11.966159169632|6|-|9.44701150246401|-2.519147667168
rs55911718	14:24457576-24458497	14	24458055	A	G	0.052632	0.058642	0.894835	0.894835	39.483	0.185887	0.000551	0.417054	23.8453	5.0609	15	14	8.69123	0	0.832605	0.549609	3.31e-10	4.63e-09	ENSG00000187630	-452	6_Weak_transcription	0	0	0	1	1	1	0	0	EWSR1-FLI1|0|-6.66335447406198|4|+|1.567891496328|-5.09546297773397
rs7307636	12:132673821-132674737	12	132674034	G	C	0.342105	0.626168	0.948875	0.948875	37.4985	0.640072	0.000758	0.504716	23.7686	5.25673	8	6	16.2347	0	0.933429	0.934611	9.15e-10	5.49e-09	ENSG00000184967	44827	1_Active_TSS	0	0	0	0	1	0	0	0	Roaz_1|0|11.96617970008|4|+|-15.38180119829|-3.41562149821002
rs346316	6:80582055-80582451	6	80582366	C	T	0.421053	1.65857	1	1	35.3256	0.176648	4.6e-05	0.40959	16.196	4.75303	2	2	0	0	0.99238	0.994036	2.79e-09	5.58e-09	ENSG00000233835	464	18_Quiescent/low_signal	1	1	0	0	0	0	0	1	SRF_known2|0|-1.58229918001999|16|+|2.43606659832|0.853767418300009
rs12476611	2:7151504-7152473	2	7151729	G	A	0.157895	0.667969	0.992096	0.992096	37.7161	0.294341	0.000705	0.530326	13.1585	5.32333	7	7	0.483827	0	0.993083	0.980982	8.18e-10	5.73e-09	ENSG00000234428	-20934	10_Active_enhancer_2	1	1	0	0	0	1	1	1	NA
rs72673501	8:98861833-98862591	8	98862431	A	G	0.236842	0.006973	0.997978	0.997978	37.9632	0.756795	0.00305	0.406931	6.96086	4.44161	8	8	17.6392	0	0.986764	0.991346	7.21e-10	5.77e-09	ENSG00000243504	-15450	6_Weak_transcription	0	0	0	1	1	1	0	0	NA
rs8092859	18:10023917-10024667	18	10024147	G	A	0.263158	2.42347	1	1	36.4915	0.296441	0.001288	0.492817	16.3407	5.13062	4	4	8.50173	0	0.976418	0.991542	1.53e-09	6.13e-09	ENSG00000223138	99999	10_Active_enhancer_2	1	1	0	0	0	0	0	0	Nkx6-1_2|0|-1.054072745|17|-|12.0127069766|10.9586342316
rs4309324	14:51605577-51606575	14	51606336	A	T	0.473684	0.058642	0.995227	0.995227	37.0334	0.67361	0.003296	0.421627	22.0488	5.10912	6	6	6.45672	0	0.991655	0.990787	1.16e-09	6.97e-09	ENSG00000100505	-42798	10_Active_enhancer_2	1	1	0	0	1	1	1	0	GR_known8|0|11.48087498025|4|-|-4.29618960475|7.18468537550001
rs4683916	3:101185501-101186386	3	101185957	C	T	0.473684	1.35111	0.999262	0.999262	35.6285	0.156623	3.9e-05	0.437258	14.7224	4.5771	3	3	2.3276	0	0.993089	0.992804	2.39e-09	7.16e-09	ENSG00000201554	8126	10_Active_enhancer_2	1	0	0	0	1	1	0	1	BDP1_disc1|0|-0.584389744356002|3|+|2.20973286873601|1.62534312438001
rs57878954	11:41806204-41806899	11	41806607	T	C	0.210526	0.0475	0.999684	0.999684	35.2206	0.190899	2.3e-05	0.381277	11.273	4.45068	3	3	7.05268	0	0.980708	0.993892	2.94e-09	8.83e-09	ENSG00000242729	246219	18_Quiescent/low_signal	0	0	0	0	0	0	0	0	BAF155_disc1|0|-11.892778809282|8|-|11.88270120076|-0.0100776085219962
rs1672396	3:101644075-101645830	3	101644145	T	C	0.552632	0.033543	0.999894	0.999894	38.4561	0.259719	1.4e-05	0.461316	4.49729	4.68205	19	19	12.3567	0	0.976021	0.889987	5.6e-10	1.06e-08	ENSG00000214407	-15629	18_Quiescent/low_signal	1	0	1	0	1	0	0	0	Ik-3|0|-9.90834812219698|4|-|12.678159865084|2.76981174288701
rs77276241	10:43133285-43134331	10	43134242	C	T	0.342105	0.626168	0.915247	0.915247	36.4389	0.320051	0.001808	0.412213	7.04629	6.73906	12	9	85.7975	0	0.91302	0.891571	1.58e-09	1.42e-08	ENSG00000196693	1000	1_Active_TSS	1	1	0	0	1	1	0	1	EBF_known1|0|-1.5829652|10|-|11.84881414|10.26584894
rs1647306	8:4046335-4046731	8	4046640	A	C	0.210526	0.0475	1	1	35.5592	0.7709	0.004423	0.496208	9.7118	3.53128	5	6	0.353472	0	0.994818	0.994155	2.47e-09	1.48e-08	ENSG00000215389	-156716	18_Quiescent/low_signal	1	0	0	0	0	0	0	0	Foxd1_1|0|10.230008832711|16|+|-4.51538050746699|5.71462832524401
rs979061	12:31382243-31382895	12	31382553	C	T	0.157895	0.667969	1	1	35.874	0.244517	0.000723	0.572273	8.22112	4.55124	8	8	17.8004	0	0.981131	0.990421	2.1e-09	1.68e-08	ENSG00000243517	23288	9_Active_enhancer_1	0	0	0	0	1	1	0	0	HNF4_known8|0|-1.997023653168|3|-|12.509066069696|10.512042416528
rs1540038	18:47182355-47182888	18	47182569	G	A	0.105263	0.262976	1	1	35.5315	0.766288	1.4e-05	0.534479	23.242	4.88103	6	7	0.024222	0	0.969868	0.988055	2.51e-09	1.76e-08	ENSG00000101670	93927	6_Weak_transcription	1	1	0	0	1	1	1	1	Foxa_disc1|0|10.941581028684|1|+|0.678390398022003|11.619971426706
rs76516995	2:127863630-127865467	2	127864921	C	G	0.184211	0.968783	1	1	35.5026	0.368021	0.002939	0.46324	21.7313	6.6436	14	7	13.7713	0	0.988109	0.990906	2.55e-09	1.78e-08	ENSG00000136717	1301	1_Active_TSS	1	0	0	1	1	1	0	0	AP-2_disc2|0|-1.68412395942001|9|+|12.09100145871|10.40687749929
NA	11:4972131-4973120	11	4972926	T	<	0.394737	0.996253	0.967772	0.967772	36.375	0.130388	0.003257	0.509076	2.10616	3.9065	10	11	0.001264	0	0.796641	0.953608	1.63e-09	1.79e-08	ENSG00000205497	-3801	18_Quiescent/low_signal	1	0	0	0	0	0	0	1	NA
rs1935737	6:78074328-78074735	6	78074477	T	C	0.631579	0.172336	0.999548	0.999548	34.5704	0.706753	0.004927	0.538702	9.20437	3.81977	5	5	2.44923	0	0.995639	0.994923	4.11e-09	2.06e-08	ENSG00000135312	98853	18_Quiescent/low_signal	0	1	0	0	0	0	1	0	NA
rs60639666	9:33424924-33425643	9	33425568	G	A	0.157895	0.667969	1	1	35.9149	0.6437	6e-06	0.576816	22.6357	5.2002	9	10	4.7838	0	0.991867	0.984704	2.06e-09	2.06e-08	ENSG00000165272	22685	10_Active_enhancer_2	1	1	1	0	0	1	1	0	RXR::LXR|0|11.966038190463|10|+|-19.813159092057|-7.847120901594
rs10145097	14:55337099-55337912	14	55337653	G	A	0.184211	0.968783	0.992002	0.992002	34.5601	0.198148	1.5e-05	0.450798	25.34	4.24013	6	5	0	0	0.917063	0.98224	4.13e-09	2.07e-08	ENSG00000241864	11165	1_Active_TSS	1	0	0	0	1	1	0	0	NA
rs17396537	2:133408787-133409072	2	133408868	G	C	0.394737	0.85067	0.99956	0.99956	31.0599	0.150557	0.00013	0.278447	12.6666	3.64865	1	1	0	0	0.99101	0.99101	2.5e-08	2.5e-08	ENSG00000230065	-9313	18_Quiescent/low_signal	1	0	0	1	0	0	0	0	CTCF_disc2|0|-11.214305772872|7|+|6.594001597594|-4.62030417527801
rs62405502	6:50203667-50204378	6	50204076	G	T	0.131579	1.81521	0.999079	0.999079	33.3959	0.200705	0.004479	0.470906	20.9805	4.72169	3	4	3.77667	0	0.886474	0.993141	7.52e-09	3.01e-08	ENSG00000226733	142242	10_Active_enhancer_2	1	1	0	0	0	0	1	1	RFX5_known3|0|-11.966142330129|15|-|12.186270327258|0.220127997128998
rs9434444	1:99198519-99199461	1	99199207	A	G	0.578947	0.353306	1	1	34.0977	0.688548	0.003594	0.523973	21.1897	4.57045	8	8	5.17238	0	0.990822	0.996242	5.24e-09	4.19e-08	ENSG00000162627	71239	6_Weak_transcription	1	0	0	0	1	1	1	0	HNF1_1|0|4.314767973477|13|-|10.138709982152|14.453477955629
rs78767971	20:52724153-52724644	20	52724238	A	C	0.184211	0.294145	0.998084	0.998084	32.4469	0.818392	3.4e-05	0.61451	10.3273	3.86471	4	4	7.15201	0	0.994644	0.992011	1.22e-08	4.9e-08	ENSG00000064787	-36849	17_Weak_repressed_polycomb	0	0	0	0	0	0	0	0	TCF12_disc2|0|11.966130726342|4|-|0.645740389905001|12.611871116247
rs2425847	20:44907733-44908248	20	44907927	A	G	0.473684	2.55444	1	1	33.3474	0.262557	0.006952	0.403829	16.163	3.79903	6	7	0	0	0.993091	0.981763	7.71e-09	5.4e-08	ENSG00000149654	-27399	10_Active_enhancer_2	1	1	0	0	1	1	1	1	NF-E2_known1|0|-11.966086669571|8|+|11.220331463334|-0.745755206237007
rs2862003	3:174976421-174977041	3	174976692	T	C	0.078947	7.73614	0.999638	0.999638	32.4399	0.235825	0.000932	0.547768	18.972	5.35128	5	5	0.928128	0	0.993975	0.991427	1.23e-08	6.15e-08	ENSG00000226779	12464	10_Active_enhancer_2	1	1	0	0	1	0	1	0	Pou5f1_disc2|0|-11.86653209216|5|-|11.779317244736|-0.0872148474240078
rs171239	3:10780407-10780982	3	10780817	T	C	0.342105	0.051986	1	1	33.4293	0.628952	1.8e-05	0.413374	36.1456	4.22872	8	9	1.37566	0	0.90497	0.994652	7.39e-09	6.65e-08	ENSG00000226567	25470	14_Bivalent/poised_TSS	0	0	0	1	1	0	0	0	AP-1_disc10|0|3.669992975599|10|-|6.96588930770501|10.635882283304
rs3777318	5:9302250-9303057	5	9302737	T	A	0.815789	4.28064	0.998776	0.998776	32.486	0.709929	0.002299	0.450713	16.2844	5.45213	6	6	10.22	0	0.996485	0.994844	1.2e-08	7.2e-08	ENSG00000246251	133974	10_Active_enhancer_2	1	1	0	0	1	1	1	1	NA
rs539114	1:147806380-147807519	1	147807110	A	T	0.236842	0.006973	0.993788	0.993788	31.6609	0.332361	5e-06	0.469751	22.7541	4.86691	13	4	11.574	0	0.978977	0.990134	1.84e-08	7.34e-08	ENSG00000202408	506	1_Active_TSS	0	0	0	0	1	1	1	1	NA
rs2721282	8:2734320-2734613	8	2734438	G	C	0.763158	0.006973	1	1	31.0352	0.199836	8.5e-05	0.365508	6.83021	3.71368	3	3	2.09979	0	0.995328	0.993942	2.53e-08	7.6e-08	ENSG00000036448	741164	18_Quiescent/low_signal	1	0	0	0	0	0	0	0	DMRT1|0|-11.966105135|3|+|8.79197658267|-3.17412855232999
rs7310093	12:100309138-100310025	12	100309806	T	C	0.631579	2.42347	1	1	31.5239	0.171579	7.7e-05	0.38061	13.0778	4.54324	4	4	0	0	0.993392	0.992834	1.97e-08	7.88e-08	ENSG00000185046	68877	18_Quiescent/low_signal	1	0	0	0	0	0	0	0	NA
rs10902480	12:132413183-132414809	12	132414769	G	T	0.763158	1.82996	0.995683	0.995683	32.7735	0.617104	0.001026	0.433921	23.8167	5.51752	8	8	27.1687	0	0.976995	0.984819	1.04e-08	8.28e-08	ENSG00000177192	-607	1_Active_TSS	0	1	0	0	1	1	0	0	LXR_1|0|11.965986417575|13|-|-6.05606480530199|5.909921612273
rs1627904	6:29894288-29895262	6	29894351	G	C	0.868421	0.43618	0.958194	0.958194	35.9249	0.776484	0.002768	0.46538	3.33599	4.4979	45	43	6.75384	0	0.923842	0.566211	2.05e-09	8.82e-08	ENSG00000227262	462	1_Active_TSS	0	0	0	0	1	1	0	0	SP1_known2|0|1.449365780951|12|+|10.346667098902|11.796032879853
rs2276176	18:47405072-47405754	18	47405304	A	G	0.184211	0.294145	0.999301	0.999301	31.5619	0.741218	0.002942	0.590597	15.8375	4.46858	4	5	2.39927	0	0.993571	0.992768	1.93e-08	9.66e-08	ENSG00000201668	-7036	6_Weak_transcription	0	1	1	0	0	0	1	0	NA
rs6490996	13:25555449-25555824	13	25555492	T	C	0.473684	0.459753	0.987057	0.987057	31.6611	0.232816	0.003745	0.406762	14.0928	3.37636	6	6	0	0	0.908709	0.977465	1.84e-08	1.1e-07	ENSG00000232858	7614	17_Weak_repressed_polycomb	1	0	0	0	0	0	0	0	Myc_disc1|0|-11.966147280976|2|+|6.15531158651099|-5.81083569446498
rs6943274	7:63767146-63768308	7	63767413	G	A	0.236842	1.82996	0.999855	0.999855	31.9331	0.418804	0.003242	0.484126	40.5419	6.85127	6	7	7.73234	0	0.944307	0.992002	1.6e-08	1.12e-07	ENSG00000234444	-692	1_Active_TSS	1	1	0	1	1	1	1	1	Smad_1|0|-9.770661191328|2|-|9.87675846739199|0.106097276063998
rs9274537	6:32634236-32634670	6	32634655	G	A	0.526316	0.058642	0.87015	0.87015	34.9848	0.344341	0.001893	0.493394	9.90516	3.68984	44	36	17.688	0	0.929757	0.506895	3.32e-09	1.2e-07	ENSG00000179344	1924	2_Weak_TSS	0	0	0	0	0	0	0	0	CDP_1|0|-2.80451423132401|4|+|9.79105509348599|6.98654086216199
rs10511316	3:112346923-112347362	3	112347079	A	G	0.236842	1.82996	1	1	30.0641	0.691066	3.7e-05	0.496092	15.8085	4.52058	3	3	4.32046	0	0.995134	0.991904	4.18e-08	1.25e-07	ENSG00000091986	21454	10_Active_enhancer_2	1	1	0	0	1	1	1	0	TAL1_known1|0|11.9660971654|5|+|1.64551668990001|13.6116138553
rs62402025	6:26923913-26925436	6	26924050	G	A	0.631579	0.172336	0.976814	0.976814	31.0671	0.645371	0.008082	0.391725	11.1746	5.89842	6	5	25.1709	0	0.978477	0.938037	2.49e-08	1.25e-07	ENSG00000241549	420	18_Quiescent/low_signal	1	0	0	1	1	1	0	0	NA
rs17168734	7:129025123-129025505	7	129025268	G	T	0.342105	0.626168	1	1	29.22	0.244881	6.9e-05	0.480947	17.7941	3.06204	2	2	2.36424	0	0.99523	0.995944	6.46e-08	1.29e-07	ENSG00000238072	25088	6_Weak_transcription	1	0	0	0	0	1	0	0	NA
rs11678980	2:162101012-162101868	2	162101261	G	A	0.421053	0.353306	0.999784	0.999784	27.8004	0.194969	6.5e-05	0.288821	8.77991	4.8568	1	1	0	0	0.995833	0.995833	1.35e-07	1.35e-07	ENSG00000227403	-239	1_Active_TSS	0	0	0	0	1	1	0	0	YY1_disc4|0|-10.063476099015|14|-|11.015655612465|0.952179513449991
rs9957252	18:45227425-45228037	18	45227821	C	T	0.289474	0.43618	1	1	29.7825	0.703751	0.009364	0.455319	11.6762	3.99118	3	3	5.62344	0	0.985593	0.994192	4.83e-08	1.45e-07	ENSG00000240715	65738	17_Weak_repressed_polycomb	1	1	0	0	0	0	1	1	NA
rs11122505	1:230536985-230538037	1	230537589	A	G	0.342105	0.626168	1	1	30.2487	0.706468	0.005081	0.580233	22.4775	4.52006	4	4	0	0	0.984582	0.996216	3.8e-08	1.52e-07	ENSG00000177614	24490	10_Active_enhancer_2	0	0	0	0	1	1	1	0	Hic1_2|0|1.356186750798|17|-|9.949697990523|11.305884741321
rs1358851	6:90057379-90057829	6	90057791	C	G	0.157895	6.93533	0.997838	0.997838	27.5294	0.233581	2.8e-05	0.425375	21.9768	4.43911	1	1	0	0	0.994138	0.994138	1.55e-07	1.55e-07	ENSG00000241519	5188	10_Active_enhancer_2	1	0	1	0	0	0	0	1	MIF-1|0|-11.966186889734|15|+|-0.776120575532985|-12.742307465267
rs12292007	11:103531903-103532464	11	103532070	G	A	0.105263	0.262976	1	1	31.5705	0.201377	5e-05	0.522005	14.1908	3.00989	8	10	18.3442	0	0.964736	0.981175	1.92e-08	1.92e-07	ENSG00000242921	-251073	18_Quiescent/low_signal	0	0	0	0	0	0	0	0	LBP-1_2|0|-11.96614030185|4|-|11.612467217575|-0.353673084275002
rs57052909	10:51827192-51828277	10	51827612	G	C	0.368421	0.172336	0.779052	0.779052	30.2646	0.349165	0.001449	0.450717	10.5256	5.59386	10	6	14.7024	0	0.690873	0.535422	3.77e-08	2.26e-07	ENSG00000099290	-493	18_Quiescent/low_signal	0	0	0	0	1	1	1	0	THAP1_disc1|0|-11.966218418076|5|-|5.95003172720001|-6.016186690876
rs4419662	6:57574449-57575657	6	57574581	G	A	0.368421	2.42347	0.992672	0.992672	29.3052	0.723687	0.014963	0.509367	17.4228	4.59241	4	4	18.4992	0	0.896244	0.521167	6.18e-08	2.47e-07	ENSG00000214566	113492	17_Weak_repressed_polycomb	0	0	0	0	0	0	0	0	Mef2_known3|0|11.587684823365|8|-|0.617421926029991|12.205106749395
rs798764	4:1731432-1731815	4	1731653	C	T	0.736842	0.655306	0.972127	0.972127	29.2917	0.787354	2.7e-05	0.542929	11.6395	3.35642	3	4	7.57024	0	0.97502	0.967888	6.23e-08	2.49e-07	ENSG00000013810	8204	6_Weak_transcription	0	0	0	1	0	0	0	0	Rad21_disc3|0|11.966079945352|4|-|-5.06557307148|6.900506873872
rs17416046	8:4399388-4399653	8	4399587	C	T	0.184211	0.968783	1	1	27.9425	0.248866	6.4e-05	0.445278	15.7091	3.24889	2	2	10.7485	0	0.982834	0.990084	1.25e-07	2.5e-07	ENSG00000215389	-509769	18_Quiescent/low_signal	1	0	0	1	0	0	0	1	E2F_known9|0|-9.60374443983599|9|+|11.797496324728|2.193751884892
rs17612333	4:169329713-169330835	4	169330384	C	A	0.078947	0.139592	0.996766	0.996766	30.3598	0.20144	0.000773	0.487824	26.8472	4.82894	8	7	7.73037	0	0.984488	0.981818	3.59e-08	2.51e-07	ENSG00000207171	-62848	10_Active_enhancer_2	0	0	1	0	0	1	0	0	NA
rs6417043	18:6728949-6730167	18	6729046	T	C	0.5	0.473684	0.998529	0.998529	31.4088	0.365597	0.003207	0.454636	19.7116	6.13171	8	12	10.2836	0	0.952313	0.993672	2.09e-08	2.51e-07	ENSG00000088756	-873	2_Weak_TSS	1	0	0	1	1	1	0	0	STAT_disc6|0|-11.966180138784|1|-|12.715937063307|0.749756924522998
rs7624416	3:32199004-32199619	3	32199218	T	C	0.473684	2.55444	0.999789	0.999789	28.649	0.235241	0.002217	0.344777	7.70398	4.77855	4	3	0	0	0.995415	0.996746	8.68e-08	2.6e-07	ENSG00000236732	-5617	10_Active_enhancer_2	1	1	0	0	0	1	1	1	Egr-1_disc4|0|-3.90055051771199|21|+|0.0686542114959821|-3.83189630621601
rs62104969	18:41511926-41512813	18	41512354	G	A	0.131579	1.81521	1	1	26.5082	0.241143	1.8e-05	0.440655	18.8155	4.90371	2	1	0	0	0.921838	0.993333	2.62e-07	2.62e-07	ENSG00000202250	-99696	10_Active_enhancer_2	1	1	1	0	0	1	1	1	RFX5_known3|0|-8.24530126248399|11|-|13.961248597557|5.71594733507301
rs28720923	5:28670443-28671138	5	28670838	T	C	0.394737	0.85067	0.99978	0.99978	27.8049	0.740849	0.004755	0.616187	19.6202	4.39916	2	2	0	0	0.99379	0.99408	1.34e-07	2.68e-07	ENSG00000239489	45678	18_Quiescent/low_signal	0	0	0	0	0	0	0	0	STAT_known6|0|11.966111679738|10|+|-7.21859455869|4.74751712104802
rs59901483	6:113627714-113628180	6	113627943	G	A	0.157895	0.824653	1	1	26.4161	0.187809	2e-05	0.427123	17.8106	4.04913	2	1	4.0205	0	0.989767	0.993473	2.75e-07	2.75e-07	ENSG00000223811	61432	18_Quiescent/low_signal	0	1	0	1	1	0	0	0	CTCF_disc2|0|-11.966097720594|5|+|4.91674712761998|-7.04935059297401
rs12237222	9:85833862-85835237	9	85834743	G	T	0.710526	3.15363	1	1	31.2093	0.407059	0.001406	0.463265	44.6846	5.59862	11	12	11.0795	0	0.975113	0.991838	2.32e-08	2.78e-07	ENSG00000229109	-385	1_Active_TSS	0	1	0	1	1	1	1	0	AP-1_disc10|0|-10.968533248772|2|+|10.888831800345|-0.0797014484270022
rs2848849	7:13764223-13765146	7	13764908	C	T	0.210526	0.0475	0.999683	0.999683	30.1063	0.378765	0.001294	0.535133	41.0833	6.36792	9	7	0	0	0.994487	0.993983	4.09e-08	2.86e-07	ENSG00000224330	134427	10_Active_enhancer_2	1	1	0	0	1	1	1	1	HNF4_disc3|0|-11.966107597623|5|+|12.796360993067|0.830253395444004
rs10506755	12:77993615-77994235	12	77993785	T	C	0.210526	1.35111	0.984982	0.984982	28.9074	0.722807	2.9e-05	0.557417	15.1821	4.43491	4	4	2.41853	0	0.976194	0.967871	7.59e-08	3.04e-07	ENSG00000231121	27693	6_Weak_transcription	0	0	0	0	0	0	0	0	HNF1_3|0|2.99725908826099|12|+|5.22786486077501|8.225123949036
rs8001002	13:24617030-24617288	13	24617032	C	A	0.526316	1.35111	1	1	28.7981	0.275635	0.011997	0.519859	11.5004	3.28825	4	4	0.544009	0	0.992541	0.992851	8.03e-08	3.21e-07	ENSG00000228741	63080	6_Weak_transcription	0	1	0	0	0	0	0	0	NA
rs12379215	9:77555518-77555903	9	77555710	T	C	0.526316	0.058642	0.998208	0.998208	25.8552	0.766789	5e-05	0.70118	13.459	3.79375	2	1	0	0	0.987559	0.993886	3.68e-07	3.68e-07	ENSG00000224297	5425	18_Quiescent/low_signal	0	0	0	1	0	0	0	0	CTCF_disc6|0|9.829828095923|5|+|-34.331028553002|-24.501200457079
rs2419054	1:68315846-68316978	1	68316501	C	A	0.368421	0.172336	0.999099	0.999099	28.3914	0.384953	0.001902	0.506406	30.2096	5.28268	6	4	12.4631	0	0.957384	0.995456	9.91e-08	3.96e-07	ENSG00000172380	-16696	6_Weak_transcription	0	1	1	1	0	0	1	0	Duxl|0|-9.42928072962501|10|+|12.890357392613|3.46107666298799
rs527313	4:13921901-13922916	4	13922335	G	A	0.236842	0.006973	0.999854	0.999854	28.3927	0.732321	0.001051	0.571353	20.6936	5.99323	4	4	0.859763	0	0.922258	0.994226	9.9e-08	3.96e-07	ENSG00000224569	-57537	10_Active_enhancer_2	0	0	0	0	0	0	0	1	TCF12_disc2|0|5.14619671313801|8|+|6.925591724142|12.07178843728
rs1871652	18:449446-449830	18	449669	G	A	0.368421	0.325822	0.999323	0.999323	27.5407	0.266357	3.5e-05	0.491949	7.10936	4.02994	3	3	8.18575	0	0.991519	0.976366	1.54e-07	4.61e-07	ENSG00000158270	51283	2_Weak_TSS	1	0	0	0	1	1	0	0	NA
rs57588856	8:127836618-127837464	8	127836925	CAA	C	0.578947	0.353306	1	1	30.0365	0.667726	0.003077	0.52726	16.038	4.56106	9	11	18.9623	0	0.970346	0.991786	4.24e-08	4.66e-07	ENSG00000212451	152850	18_Quiescent/low_signal	0	0	0	1	1	1	1	0	AP-1_disc3|0|10.776601295657|7|+|-0.627843958562991|10.148757337094
rs2854746	7:45960254-45961089	7	45960645	G	C	0.342105	0.051986	0.940929	0.940929	28.0649	0.344612	0.001562	0.406116	26.9762	5.56691	4	4	9.4091	0	0.905645	0.783563	1.17e-07	4.69e-07	ENSG00000146674	1219	1_Active_TSS	0	0	0	0	0	0	0	0	NA
rs1876177	18:75523507-75523751	18	75523646	T	C	0.342105	3.27834	0.992385	0.992385	27.4813	0.746319	0.003694	0.437032	9.79009	3.3795	3	3	3.88626	0	0.991551	0.99108	1.59e-07	4.76e-07	ENSG00000199728	-273233	17_Weak_repressed_polycomb	1	0	0	0	0	0	0	0	NA
rs4692696	4:169991133-169992425	4	169992246	C	T	0.605263	0.85067	0.984481	0.984481	29.0827	0.320852	0.007653	0.406711	15.4203	4.72025	9	7	8.98563	0	0.963746	0.975462	6.94e-08	4.85e-07	ENSG00000145439	-59711	6_Weak_transcription	1	0	0	0	1	1	0	0	AIRE_1|0|-11.966237494304|11|-|11.607101954608|-0.359135539695998
rs7098889	10:51544356-51544831	10	51544475	C	T	0.578947	6.13378	0.999892	0.999892	28.4349	0.805882	2.2e-05	0.464662	5.03292	3.89932	4	5	0	0	0.996837	0.996802	9.69e-08	4.85e-07	ENSG00000236074	-3649	17_Weak_repressed_polycomb	1	0	0	0	1	1	1	0	NA
rs140221816	1:80519586-80520202	1	80520068	CAT	C	0.184211	0.968783	1	1	28.4241	0.282605	2.7e-05	0.531209	17.564	4.93754	4	5	4.41049	0	0.986266	0.988016	9.74e-08	4.87e-07	ENSG00000235756	39338	17_Weak_repressed_polycomb	1	1	1	0	0	1	1	1	Foxa_disc2|0|-11.966142952764|3|+|-33.040632859948|-45.006775812712
rs564514340	5:127418468-127420355	5	127418857	A	G	0.315789	0.902531	0.82456	0.82456	29.0268	0.179708	0.009418	0.387256	8.18217	7.07683	5	7	28.7743	0	0.847902	0.532209	7.14e-08	5e-07	ENSG00000064651	-991	1_Active_TSS	0	1	0	1	1	1	0	0	NA
rs11049605	12:28596002-28596818	12	28596065	G	T	0.184211	0.294145	0.997403	0.997403	28.3173	0.270689	0.002015	0.568914	17.6425	5.16676	4	5	10.7097	0	0.98318	0.971843	1.03e-07	5.15e-07	ENSG00000202187	-62335	6_Weak_transcription	1	1	0	0	0	0	1	0	E2F_disc6|0|-5.49911890294|7|+|12.657901654448|7.158782751508
rs13084113	3:101533541-101534419	3	101534039	C	G	0.447368	0.033543	0.9983	0.9983	27.3263	0.310167	0.002805	0.431617	22.5236	4.87057	3	3	0.449312	0	0.975509	0.994831	1.72e-07	5.16e-07	ENSG00000144802	-13295	10_Active_enhancer_2	1	1	0	0	0	1	0	0	NA
rs2959393	18:76692274-76692653	18	76692465	C	T	0.684211	0.902531	0.992817	0.992817	26.1459	0.197421	0.000124	0.431841	13.965	3.24855	3	2	0	0	0.983739	0.93462	3.17e-07	6.33e-07	ENSG00000151514	-48002	17_Weak_repressed_polycomb	0	0	0	0	0	0	0	0	NA
rs59727886	2:88565051-88565623	2	88565319	A	G	0.184211	0.294145	0.998602	0.998602	26.1222	0.185572	2.5e-05	0.394458	11.3323	4.16656	2	2	1.0252	0	0.989721	0.992674	3.2e-07	6.41e-07	ENSG00000202012	-35868	10_Active_enhancer_2	1	1	0	0	1	1	0	0	Bach1|0|-11.96622056942|5|-|10.43079403679|-1.53542653263
rs113755845	5:101490464-101491414	5	101490790	A	T	0.210526	0.0475	0.999842	0.999842	27.3175	0.28532	0.003521	0.459845	14.0087	4.37908	7	4	1.10225	0	0.958864	0.991296	1.73e-07	6.91e-07	ENSG00000199786	-23619	18_Quiescent/low_signal	0	0	0	0	0	0	0	0	HDAC2_disc3|0|-11.90214671626|15|+|2.64913726958|-9.25300944668001
rs16942751	18:24392976-24393394	18	24393213	C	A	0.105263	3.6981	1	1	24.4173	0.210737	0.005226	0.408163	14.3934	3.97019	2	1	0	0	0.847093	0.992237	7.76e-07	7.76e-07	ENSG00000236721	-52297	18_Quiescent/low_signal	0	1	0	1	1	0	0	0	Irf_known7|0|-0.999025173104002|17|-|11.809990833824|10.81096566072
rs72744026	1:193583857-193584442	1	193584122	A	G	0.131579	0.43618	0.99954	0.99954	25.632	0.232105	0.002288	0.478494	12.1192	4.30755	2	2	14.7415	0	0.993145	0.989536	4.13e-07	8.26e-07	ENSG00000226640	-64168	10_Active_enhancer_2	0	1	0	0	0	0	1	0	NA
rs34592417	5:110796978-110797479	5	110797259	C	G	0.447368	2.79807	0.999256	0.999256	25.6162	0.278011	7.4e-05	0.441882	15.5298	4.14388	2	2	13.8011	0	0.990451	0.992381	4.17e-07	8.33e-07	ENSG00000246859	-50947	18_Quiescent/low_signal	0	0	0	1	0	0	0	0	Pbx3_disc3|0|-1.155759423696|3|-|12.027039665457|10.871280241761
rs76211385	12:99092446-99092931	12	99092837	A	G	0.157895	0.824653	0.99842	0.99842	25.5029	0.217381	3.3e-05	0.373789	26.4337	3.92714	2	2	0	0	0.992071	0.993085	4.42e-07	8.83e-07	ENSG00000120868	53367	6_Weak_transcription	1	0	0	1	1	0	1	0	CTCF_disc2|0|-11.966097720594|4|+|4.91674712761998|-7.04935059297401
rs11824243	11:26305974-26306663	11	26306556	C	A	0.105263	3.6981	1	1	28.1747	0.250163	1e-05	0.388579	41.3381	4.39434	6	8	7.08967	0	0.991284	0.992345	1.11e-07	8.87e-07	ENSG00000134343	-46998	2_Weak_TSS	1	0	0	1	1	0	0	0	NA
rs9839388	3:196255459-196256043	3	196255954	G	C	0.421053	1.65857	0.997316	0.997316	28.0672	0.352669	1.4e-05	0.481215	19.9288	4.26655	8	8	2.06401	0	0.950473	0.971296	1.17e-07	9.37e-07	ENSG00000213358	203	1_Active_TSS	0	0	0	1	1	1	0	0	Znf143_known1|0|-2.58200386184001|20|-|10.293524259115|7.711520397275
rs9271160	6:32577480-32578119	6	32577646	A	G	0.789474	1.35111	0.993849	0.993849	31.4377	0.320921	0.002948	0.520444	8.6206	4.61036	42	46	3.04537	0	0.985209	0.77421	2.06e-08	9.47e-07	ENSG00000196126	573	17_Weak_repressed_polycomb	0	0	0	0	0	0	0	0	STAT_known7|0|-1.07752306614399|9|-|11.657942080872|10.580419014728
rs372827624	2:10182698-10184636	2	10183748	GCC	-	0.315789	0.902531	0.982399	0.982399	28.8298	0.608224	0.00135	0.373152	29.6797	6.73998	8	13	18.5263	0	0.98637	0.893473	7.9e-08	1.03e-06	ENSG00000172059	-279	1_Active_TSS	0	0	0	0	1	1	0	0	NA
rs6853156	4:57773452-57775516	4	57774843	C	T	0.210526	1.35111	1	1	28.6252	0.367989	0.00023	0.466784	48.8256	5.97894	11	12	8.55437	0	0.984221	0.991765	8.78e-08	1.05e-06	ENSG00000084093	-624	2_Weak_TSS	0	0	0	0	1	0	0	0	NA
rs4891589	18:64741408-64742043	18	64741769	G	A	0.894737	0.262976	0.996951	0.996951	26.9149	0.795177	1e-05	0.52227	10.3667	4.10668	7	5	3.53674	0	0.993575	0.984189	2.13e-07	1.06e-06	ENSG00000238680	128054	18_Quiescent/low_signal	1	1	0	0	0	0	1	0	Foxc1_1|0|11.966106118866|7|-|-3.40038792163|8.56571819723601
rs11125343	2:51511058-51511547	2	51511280	G	C	0.289474	0.43618	0.999872	0.999872	26.4664	0.270814	4.8e-05	0.510587	9.17968	3.28209	4	4	5.41724	0	0.991128	0.989914	2.68e-07	1.07e-06	ENSG00000237374	-62156	18_Quiescent/low_signal	0	0	0	0	0	1	0	0	RXRA_known1|0|-2.99317605102601|21|+|7.063274646427|4.07009859540099
rs560231922	6:44354757-44355879	6	44355677	C	CG	0.105263	0.262976	0.993344	0.993344	26.8688	0.34535	0.002254	0.53197	19.6523	5.49528	4	5	22.2007	0	0.988859	0.960209	2.18e-07	1.09e-06	ENSG00000096401	-506	1_Active_TSS	0	1	0	0	1	1	1	0	NA
rs13058947	3:1613143-1614031	3	1613623	C	T	0.447368	0.033543	1	1	27.4715	0.832358	0.002866	0.644644	4.85054	4.60955	6	7	0	0	0.979989	0.99157	1.59e-07	1.12e-06	ENSG00000184423	24786	18_Quiescent/low_signal	1	0	0	0	0	0	1	1	NA
rs140077459	11:118560284-118561272	11	118560953	G	GC	0.184211	0.968783	1	1	26.3741	0.354788	0.00161	0.490869	32.806	5.6097	3	4	7.98596	0	0.991259	0.986607	2.81e-07	1.13e-06	ENSG00000118094	-9903	1_Active_TSS	0	0	0	1	1	1	0	0	CTCF_disc1|0|-12.416805947625|10|+|10.100608810416|-2.316197137209
rs6445507	3:65734671-65735135	3	65734852	C	G	0.552632	0.554724	0.999681	0.999681	26.3732	0.728858	3.6e-05	0.499488	9.91377	3.39678	5	4	5.13067	0	0.992091	0.99256	2.81e-07	1.13e-06	ENSG00000244226	61694	6_Weak_transcription	0	0	0	0	0	0	0	0	Ets_known9|0|11.966222414016|6|+|-0.781519807248003|11.184702606768
rs7965144	12:19414760-19415012	12	19414905	G	C	0.210526	1.35111	0.999684	0.999684	26.3669	0.272981	1.6e-05	0.525588	19.5734	3.36098	4	4	10.5604	0	0.984644	0.991013	2.82e-07	1.13e-06	ENSG00000223283	-41655	6_Weak_transcription	1	0	0	0	0	0	0	1	TATA_known2|0|-0.677548371599997|1|+|11.133036|10.4554876284
rs6563565	13:38201210-38202090	13	38201685	T	C	0.394737	3.83512	1	1	27.5996	0.720789	0.001024	0.52244	9.7421	5.12474	8	8	0.06764	0	0.996535	0.997102	1.49e-07	1.19e-06	ENSG00000133110	-28229	18_Quiescent/low_signal	1	0	0	0	0	0	0	0	NA
rs13239249	7:154439146-154439670	7	154439356	G	C	0.131579	0.43618	1	1	26.6319	0.706983	0.003325	0.348591	23.5542	4.56164	5	5	5.46748	0	0.98515	0.9897	2.46e-07	1.23e-06	ENSG00000221099	-37784	10_Active_enhancer_2	1	0	0	0	0	1	1	0	PPAR_2|0|11.966195973498|4|-|-1.889184171759|10.077011801739
rs114139530	3:101394883-101396446	3	101395052	G	A	0.157895	0.667969	0.999209	0.999209	25.9514	0.372648	7e-06	0.477955	30.7156	7.20464	2	4	24.4541	0	0.996923	0.990559	3.5e-07	1.4e-06	ENSG00000066422	1456	1_Active_TSS	0	1	0	1	1	1	1	0	NA
rs324259	11:21971197-21971870	11	21971493	A	G	0.236842	0.006973	0.999709	0.999709	27.5117	0.679029	0.001446	0.443707	23.4839	4.63839	6	9	3.81622	0	0.99629	0.994219	1.56e-07	1.41e-06	ENSG00000171714	-243526	18_Quiescent/low_signal	1	0	0	0	0	0	0	0	NA
rs6947778	7:86475445-86476577	7	86476124	G	C	0.105263	0.262976	1	1	25.321	0.20645	0.001046	0.412688	15.7127	5.78713	3	3	16.6274	0	0.993985	0.986798	4.85e-07	1.46e-06	ENSG00000233073	-59459	6_Weak_transcription	1	1	0	0	0	1	1	1	NA
rs72986245	6:128921592-128922745	6	128922428	C	T	0.052632	0.058642	0.989559	0.989559	25.8516	0.240027	7e-06	0.519107	16.478	5.72372	4	4	11.6411	0	0.979433	0.972133	3.69e-07	1.47e-06	ENSG00000238938	-12755	10_Active_enhancer_2	1	1	0	0	1	1	1	1	NA
rs488797	18:34970466-34970815	18	34970627	C	T	0.394737	0.85067	1	1	24.4934	0.81836	2.8e-05	0.715648	9.27274	4.87357	2	2	0	0	0.991265	0.992417	7.46e-07	1.49e-06	ENSG00000101489	175534	10_Active_enhancer_2	1	1	0	0	0	0	0	0	Foxa_disc2|0|11.966142952764|2|-|4.951351238276|16.91749419104
rs6533442	4:110551885-110553322	4	110553141	C	G	0.842105	0.824653	0.993589	0.993589	24.4845	0.669301	1.7e-05	0.485529	35.0322	5.39349	2	2	8.88181	0	0.99287	0.988089	7.49e-07	1.5e-06	ENSG00000005059	70519	18_Quiescent/low_signal	1	1	0	0	1	1	0	1	NA
rs1597555	7:32545980-32546255	7	32546118	T	G	0.421053	0.353306	1	1	24.4168	0.659905	4e-05	0.434555	34.1599	3.74356	2	2	0.216718	0	0.995198	0.994926	7.76e-07	1.55e-06	ENSG00000105778	10941	10_Active_enhancer_2	0	0	0	0	0	0	0	0	CEBPB_known3|0|3.288757122224|6|+|8.298281549936|11.58703867216
rs6961909	7:12595446-12596351	7	12596096	C	A	0.447368	0.033543	0.993452	0.993452	26.141	0.256291	0.013961	0.480007	5.63095	3.77661	5	5	8.21825	0	0.974471	0.960475	3.17e-07	1.59e-06	ENSG00000006747	-14758	18_Quiescent/low_signal	0	0	0	0	0	0	0	0	Egr-1_disc4|0|-2.319203459644|4|-|1.65022746711199|-0.668975992532012
rs12503840	4:189892404-189892790	4	189892615	G	A	0.315789	0.902531	1	1	26.4668	0.285188	0.003083	0.52319	6.76214	3.56075	7	6	9.57258	0	0.993632	0.992182	2.68e-07	1.61e-06	ENSG00000180015	232897	6_Weak_transcription	1	1	0	1	0	0	0	0	NA
rs838638	3:143199167-143199493	3	143199328	G	A	0.526316	0.459753	1	1	24.3179	0.742668	7.3e-05	0.552707	13.8063	3.74933	2	2	0.002906	0	0.992749	0.995701	8.17e-07	1.63e-06	ENSG00000243033	23950	18_Quiescent/low_signal	0	1	1	0	1	0	0	0	Pou3f2_1|0|11.840659791466|5|-|0.8254831422|12.666142933666
rs13028754	2:196932911-196934027	2	196933188	T	C	0.526316	0.459753	0.999789	0.999789	26.5207	0.388954	0.000983	0.4612	32.4842	6.51916	9	7	24.3075	0	0.992579	0.996348	2.61e-07	1.83e-06	ENSG00000118997	2819	1_Active_TSS	1	0	0	1	1	1	0	0	NA
rs3746988	21:46975443-46976273	21	46976111	C	T	0.236842	0.006973	0.91493	0.91493	25.7431	0.22856	1.1e-05	0.428379	9.38512	5.22219	6	5	13.55	0	0.826722	0.781027	3.9e-07	1.95e-06	ENSG00000173638	-11129	2_Weak_TSS	0	0	0	1	1	1	0	0	EBF_disc2|0|-10.495360939174|13|+|11.103662863085|0.608301923911
rs35502260	14:34011914-34012367	14	34011937	G	A	0.526316	0.459753	0.994196	0.994196	23.9509	0.349126	7.8e-05	0.4953	26.5161	3.97479	2	2	9.05574	0	0.986557	0.99097	9.88e-07	1.98e-06	ENSG00000245273	-406635	18_Quiescent/low_signal	1	0	0	0	1	0	0	0	NA
rs1786372	21:21823291-21823965	21	21823596	G	A	0.657895	0.626168	0.947081	0.947081	25.5277	0.731565	1.6e-05	0.620106	18.5925	4.13974	5	5	0.601943	0	0.955003	0.945947	4.36e-07	2.18e-06	ENSG00000233206	-20217	18_Quiescent/low_signal	0	0	0	0	0	0	0	0	Bach1|0|11.96610935299|9|-|-1.97973617048|9.98637318250999
rs73203861	7:115945923-115946604	7	115946045	T	A	0.263158	0.139592	1	1	26.1709	0.789007	0.002014	0.732369	6.7725	4.86694	6	7	0	0	0.990658	0.994299	3.13e-07	2.19e-06	ENSG00000234974	10933	18_Quiescent/low_signal	1	0	0	0	0	0	0	0	NA
rs4556892	18:63842471-63842814	18	63842558	A	G	0.368421	1.96301	1	1	26.6028	0.304252	0.004262	0.43706	8.87787	3.24084	9	9	0.20617	0	0.993911	0.995089	2.5e-07	2.25e-06	ENSG00000081138	424982	18_Quiescent/low_signal	0	0	0	0	0	0	0	1	NA
rs117400415	7:89747686-89749339	7	89748700	C	G	0.184211	0.294145	0.877098	0.877098	26.5757	0.619361	0.002207	0.494511	33.744	6.24484	8	9	11.3854	0	0.839782	0.824882	2.53e-07	2.28e-06	ENSG00000235436	-1029	18_Quiescent/low_signal	0	0	0	0	1	0	0	0	Nrf1_disc1|0|1.58388160641599|3|-|8.17644196492601|9.760323571342
rs10826861	10:31040775-31041043	10	31040980	A	G	0.342105	1.5558	0.982755	0.982755	23.607	0.777018	3.4e-05	0.693439	12.7288	3.10694	3	2	0	0	0.959779	0.964282	1.18e-06	2.36e-06	ENSG00000230720	28594	17_Weak_repressed_polycomb	0	0	0	1	0	0	0	0	NRSF_known1|0|11.85911945667|11|+|-6.88522800372002|4.97389145295
rs2863179	11:45281201-45281789	11	45281309	G	T	0.368421	0.172336	1	1	23.5788	0.349904	4.8e-05	0.422637	22.8632	4.95499	2	2	4.34301	0	0.994285	0.996	1.2e-06	2.4e-06	ENSG00000019505	26683	10_Active_enhancer_2	0	0	0	0	0	0	1	0	MAZ|0|-11.966122351008|2|+|13.06351832999|1.09739597898201
rs62097515	18:12271426-12272140	18	12271828	G	C	0.131579	0.43618	0.938985	0.938985	23.508	0.268257	1.5e-05	0.486386	38.1294	4.60956	2	2	12.627	0	0.959047	0.911925	1.24e-06	2.49e-06	ENSG00000176194	17107	10_Active_enhancer_2	0	0	0	1	1	1	0	0	Rad21_disc4|0|-11.96613266348|2|-|13.61454976664|1.64841710316
rs6555821	5:156472964-156473493	5	156473063	G	A	0.394737	3.83512	0.99989	0.99989	23.4479	0.316363	1.8e-05	0.422244	21.0883	4.97526	3	2	0	0	0.99728	0.996881	1.28e-06	2.57e-06	ENSG00000113249	12523	10_Active_enhancer_2	1	1	0	0	1	1	0	1	STAT_known15|0|-2.113742029699|22|+|10.287259986064|8.173517956365
rs4245535	6:108448826-108449585	6	108449212	C	T	0.131579	0.43618	0.999311	0.999311	24.1319	0.698784	0.007187	0.502266	51.8339	5.35547	2	3	0	0	0.985274	0.98922	9e-07	2.7e-06	ENSG00000225174	4106	17_Weak_repressed_polycomb	1	1	0	0	0	0	0	0	Bach1|0|11.96610935299|9|+|-2.89260062791999|9.07350872507
rs1037629	4:167737982-167738751	4	167738195	G	A	0.289474	0.43618	1	1	24.6309	0.203199	3.6e-05	0.403898	19.8447	4.37922	4	4	0.06182	0	0.984664	0.993911	6.94e-07	2.78e-06	ENSG00000212373	101647	18_Quiescent/low_signal	1	0	0	0	0	0	0	0	TLX1::NFIC|0|-11.9662088373|5|-|6.769166221974|-5.19704261532598
rs11442782	3:59526975-59527466	3	59527158	G	GA	0.289474	2.46609	0.998854	0.998854	25.6952	0.21015	2.9e-05	0.449967	4.11881	3.1999	7	7	0.427773	0	0.985369	0.984902	4e-07	2.8e-06	ENSG00000241804	5385	6_Weak_transcription	1	0	0	0	0	0	1	0	CIZ|0|-1.752862532656|1|+|12.29447037482|10.541607842164
rs12476550	2:153021771-153022439	2	153021983	A	G	0.131579	0.43618	1	1	24.0518	0.711144	4.4e-05	0.566917	34.7469	4.12736	3	3	2.92165	0	0.976965	0.989379	9.38e-07	2.81e-06	ENSG00000245987	-8986	6_Weak_transcription	1	0	0	0	0	0	0	0	Hand1_2|0|4.79728490918801|4|-|6.98346052468099|11.780745433869
rs1919738	10:54351015-54351412	10	54351105	T	C	0.684211	1.37722	0.999878	0.999878	24.594	0.281364	3.1e-05	0.413407	16.5557	3.79916	4	4	0.848253	0	0.946434	0.996184	7.08e-07	2.83e-06	ENSG00000231131	-120722	18_Quiescent/low_signal	1	0	0	0	0	0	0	0	Zfp410|0|-6.3107711177|11|+|10.896163771364|4.58539265366399
rs368435694	7:38385102-38385512	7	38385337	G	A	0.184211	0.294145	0.9064	0.9064	26.4276	0.217537	1.3e-05	0.514414	15.4159	3.25641	12	11	2.57513	0	0.832472	0.881168	2.74e-07	3.01e-06	ENSG00000228668	-2	18_Quiescent/low_signal	0	0	0	1	1	0	0	0	NA
rs6462988	7:40756813-40757308	7	40757018	G	C	0.131579	1.81521	0.99725	0.99725	23.8307	0.233615	2.4e-05	0.445195	8.07337	4.05552	3	3	0.488858	0	0.994716	0.991214	1.05e-06	3.16e-06	ENSG00000227658	-58345	1_Active_TSS	1	0	0	0	1	1	0	0	HES1|0|-1.58302634864999|13|-|12.462784018695|10.879757670045
rs6888163	5:74212402-74213091	5	74212755	A	G	0.210526	0.0475	1	1	23.7913	0.293344	1.4e-05	0.450159	18.7079	4.66212	3	3	3.94207	0	0.989974	0.994269	1.07e-06	3.22e-06	ENSG00000196390	-13304	6_Weak_transcription	1	1	1	0	1	1	1	0	Foxd3|0|-11.411765504784|8|-|12.60516537396|1.19339986917599
rs9830600	3:94133256-94133620	3	94133612	G	C	0.421053	4.96836	0.974669	0.974669	24.7609	0.734061	0.008802	0.553423	6.28658	3.52524	5	5	0.591853	0	0.926262	0.843404	6.49e-07	3.25e-06	ENSG00000178660	93208	18_Quiescent/low_signal	0	0	0	0	1	0	1	1	NA
rs17408553	6:31238883-31240275	6	31239407	G	T	0.368421	1.96301	0.999214	0.999214	29.9962	0.40201	0.010072	0.443061	4.04258	5.7038	79	76	0.405446	0	0.933657	0.994086	4.33e-08	3.29e-06	ENSG00000204525	1024	1_Active_TSS	0	0	0	1	1	1	0	0	AP-2_known1|0|-1.41320982575499|12|-|12.344302015315|10.93109218956
rs5849344	3:60193559-60194164	3	60194106	CA	C	0.289474	0.206997	1	1	25.8681	0.357262	0.001688	0.437483	31.5909	5.02582	8	9	0.351657	0	0.993974	0.990375	3.66e-07	3.29e-06	ENSG00000240097	-408997	10_Active_enhancer_2	1	1	0	0	0	1	1	1	Ik-1_2|0|-11.41382115783|4|-|11.971098425868|0.557277268037993
rs4685781	3:116786-117420	3	117152	C	A	0.263158	0.139592	0.974374	0.974374	22.9495	0.749472	5.4e-05	0.649565	6.9589	3.71602	3	2	3.31751	0	0.95677	0.93895	1.66e-06	3.33e-06	ENSG00000224918	-20757	18_Quiescent/low_signal	0	0	0	0	0	0	0	0	ATF3_known3|0|11.966127667668|4|+|-10.674057077643|1.29207059002502
rs6957736	7:51170381-51170871	7	51170630	G	A	0.078947	0.139592	1	1	22.6965	0.667608	4.1e-05	0.409048	40.7422	4.55965	2	2	10.2629	0	0.994525	0.985124	1.9e-06	3.79e-06	ENSG00000231490	157483	10_Active_enhancer_2	0	0	0	0	0	1	0	0	NA
rs10911363	1:183549573-183549907	1	183549757	G	T	0.421053	0.120222	0.98036	0.98036	21.3066	0.239527	0.000182	0.291463	13.4924	3.40223	2	1	0	0	0.976716	0.96591	3.91e-06	3.91e-06	ENSG00000116701	10438	10_Active_enhancer_2	0	0	0	1	1	1	0	1	Lmo2-complex_1|0|-11.966105201666|4|-|12.102361410915|0.136256209248998
rs12469001	2:192567728-192568508	2	192567931	T	A	0.131579	1.81521	1	1	23.9151	0.682658	0.001267	0.541708	48.5877	5.09211	7	4	10.953	0	0.986753	0.993334	1.01e-06	4.03e-06	ENSG00000234615	-24418	17_Weak_repressed_polycomb	0	1	0	0	1	1	1	1	Pou2f2_known2|0|11.870960996484|15|+|-0.604767997094001|11.26619299939
rs11879091	19:1082043-1083004	19	1082265	C	T	0.421053	0.120222	1	1	24.3306	0.296613	0.00429	0.534217	16.4693	4.96155	5	5	-8.3e-05	0	0.949249	0.995127	8.11e-07	4.06e-06	ENSG00000099817	13348	10_Active_enhancer_2	0	0	0	0	1	0	0	0	NRSF_disc7|0|-11.404477550656|6|-|14.222098|2.81762044934401
rs72644879	12:51632261-51633230	12	51632448	A	G	0.210526	0.0475	0.952229	0.952229	23.8852	0.353105	0.001239	0.537664	19.5701	5.97428	6	4	14.4782	0	0.966459	0.944557	1.02e-06	4.09e-06	ENSG00000183283	-248	3_Flanking_TSS	0	0	0	0	1	1	0	0	MZF1::1-4_3|0|-11.873050674576|3|+|11.495576787328|-0.377473887248001
rs1578833	1:164864640-164865123	1	164864964	C	G	0.657895	1.5558	0.999301	0.999301	22.5359	0.806075	3.9e-05	0.538549	5.714	4.13455	2	2	4.03138	0	0.993388	0.99232	2.06e-06	4.13e-06	ENSG00000225487	26226	10_Active_enhancer_2	1	0	1	0	1	1	1	0	1
rs9287983	2:152401067-152401537	2	152401311	C	A	0.631579	0.325822	1	1	21.1141	0.705728	2.5e-05	0.545924	14.3284	4.41995	2	1	2.94051	0	0.99545	0.992014	4.33e-06	4.33e-06	ENSG00000080345	134669	18_Quiescent/low_signal	0	1	0	0	0	1	1	0	Hoxb3|0|7.61227035816|10|-|6.38168534556|13.99395570372
rs67953644	2:191242985-191243564	2	191243113	T	A	0.315789	1.37722	0.897337	0.897337	23.2157	0.76373	9.4e-05	0.513674	6.06266	3.76666	3	3	0.855674	0	0.828246	0.881584	1.45e-06	4.34e-06	ENSG00000151690	-30097	6_Weak_transcription	0	0	0	0	0	1	0	0	NA
rs12997735	2:77339973-77340417	2	77340242	C	G	0.394737	3.83512	1	1	22.4088	0.22123	5e-05	0.458243	6.46474	3.61682	3	2	0	0	0.9754	0.994409	2.2e-06	4.41e-06	ENSG00000234653	126881	18_Quiescent/low_signal	0	0	0	0	1	0	1	1	SRF_known6|0|-11.966142397916|6|+|9.603314545519|-2.36282785239699
rs7605414	2:52914005-52914405	2	52914306	A	T	0.315789	1.37722	0.999878	0.999878	23.7359	0.29454	0.003439	0.426554	20.6193	3.43094	4	4	0	0	0.994605	0.994641	1.11e-06	4.42e-06	ENSG00000233083	57123	18_Quiescent/low_signal	0	0	0	0	0	0	0	0	E2A_2|0|-11.966172335026|7|+|12.818806156797|0.852633821770993
rs10216696	8:3044906-3045237	8	3045106	T	C	0.131579	0.43618	0.952777	0.952777	25.4921	0.204544	0.004078	0.503721	1.6701	2.35562	10	10	12.1606	0	0.986628	0.904166	4.44e-07	4.44e-06	ENSG00000222546	-513109	18_Quiescent/low_signal	0	0	0	0	0	0	0	0	TCF11::MafG|0|-1.583228069092|3|-|11.794176282858|10.210948213766
rs2421016	10:124167102-124167694	10	124167512	C	T	0.368421	0.172336	0.999323	0.999323	21.0661	0.276591	0.000142	0.292787	15.0373	3.74206	2	1	0	0	0.992335	0.993846	4.44e-06	4.44e-06	ENSG00000107679	32928	6_Weak_transcription	0	0	0	0	0	1	0	1	Egr-1_known4|0|-6.20172828054901|11|-|18.751503820101|12.549775539552
rs11247060	15:99663792-99664414	15	99664045	G	A	0.210526	1.35111	1	1	23.7229	0.323601	1.3e-05	0.579598	11.6485	4.82208	4	4	6.25815	0	0.995346	0.991833	1.11e-06	4.45e-06	ENSG00000182253	18505	10_Active_enhancer_2	0	1	0	0	1	1	1	1	Bach1|0|-11.96610935299|8|-|11.9463403284|-0.0197690245900048
rs13006558	2:49533908-49534424	2	49534276	C	G	0.289474	0.43618	0.984748	0.984748	22.3682	0.707833	5.7e-05	0.451857	11.7322	4.22666	2	2	3.08717	0	0.931566	0.87338	2.25e-06	4.5e-06	ENSG00000206915	-72870	18_Quiescent/low_signal	1	0	0	0	0	0	1	0	CEBPB_known6|0|11.966207480025|7|-|-0.0993833551680012|11.866824124857
rs4518138	3:174992250-174992942	3	174992746	A	G	0.447368	0.033543	0.943629	0.943629	23.6587	0.284498	0.002054	0.531	9.20462	3.65075	7	4	3.97267	0	0.962776	0.863379	1.15e-06	4.6e-06	ENSG00000226779	-3365	18_Quiescent/low_signal	1	0	0	0	0	0	0	0	Foxd1_1|0|-10.644801764866|14|-|6.00835872711002|-4.63644303775598
rs4506236	8:20294152-20294779	8	20294357	T	G	0.131579	0.43618	1	1	22.3057	0.800187	3.2e-05	0.523337	16.4614	4.32947	5	2	0.647677	0	0.995048	0.973864	2.33e-06	4.65e-06	ENSG00000240976	114560	17_Weak_repressed_polycomb	0	0	0	0	0	0	0	0	Nr2e3|0|11.902023092922|4|+|1.08802590707799|12.990049
rs2717150	18:75086106-75086315	18	75086187	G	C	0.131579	0.43618	0.949204	0.949204	20.9336	0.225545	8.3e-05	0.288111	18.3565	3.07367	2	1	0	0	0.676949	0.82487	4.75e-06	4.75e-06	ENSG00000199392	57539	10_Active_enhancer_2	1	1	1	0	1	1	0	0	Foxa_disc1|0|-11.966210302799|4|+|12.535013443239|0.568803140439996
rs17547851	4:171204229-171204635	4	171204388	C	G	0.078947	0.139592	0.962641	0.962641	22.2443	0.304032	9e-06	0.57333	16.3119	4.58522	3	2	12.0164	0	0.98369	0.947016	2.4e-06	4.8e-06	ENSG00000109576	-192857	18_Quiescent/low_signal	0	0	0	0	1	1	0	0	HDAC2_disc6|0|-3.78733963690001|7|-|11.51526382575|7.72792418885001
rs76239561	10:61192233-61192698	10	61192451	A	G	0.105263	0.262976	0.951866	0.951866	22.1556	0.271805	0.001651	0.474504	22.7221	4.33771	2	2	16.9355	0	0.975003	0.931725	2.51e-06	5.03e-06	ENSG00000148541	-69572	18_Quiescent/low_signal	1	1	1	0	0	0	1	1	NF-E2_disc1|0|-11.95213555279|2|-|10.26435307798|-1.68778247481001
rs13380034	15:64225776-64226006	15	64225824	G	A	0.289474	3.15363	0.999872	0.999872	23.3895	0.734573	8.2e-05	0.512536	10.9519	2.69921	3	4	10.9159	0	0.991993	0.978183	1.32e-06	5.29e-06	ENSG00000199156	-62558	6_Weak_transcription	0	0	0	0	0	0	0	0	NA
rs1369067	2:232478321-232479556	2	232479239	A	G	0.5	2.57895	0.999684	0.999684	24.9476	0.4362	0.002069	0.483505	49.9976	5.86961	9	9	1.56531	0	0.994606	0.988888	5.89e-07	5.3e-06	ENSG00000177673	20708	1_Active_TSS	0	0	0	0	1	1	0	0	ZEB1_known2|0|-0.998929694344|2|-|11.782265|10.783335305656
rs274703	5:6728142-6728507	5	6728372	A	C	0.684211	0.012492	0.999028	0.999028	22.8018	0.764982	0.002863	0.55943	9.06371	3.9599	3	3	0	0	0.989531	0.974167	1.8e-06	5.39e-06	ENSG00000112941	13423	10_Active_enhancer_2	0	0	0	0	0	0	1	0	Myf_3|0|11.966116853812|7|+|0.457637377780003|12.423754231592
rs58046905	11:93628197-93628958	11	93628231	C	T	0.210526	1.35111	0.999368	0.999368	23.3533	0.657228	0.00016	0.580982	35.7351	4.4893	2	4	8.23066	0	0.992891	0.990256	1.35e-06	5.39e-06	ENSG00000214376	-44500	18_Quiescent/low_signal	1	0	0	1	1	1	0	0	Foxa_disc1|0|10.941581028684|1|-|0.986648001009002|11.928229029693
rs58284357	5:107156166-107156938	5	107156259	C	T	0.131579	0.43618	0.998853	0.998853	23.7278	0.723069	0.00401	0.593301	16.1346	4.34442	6	5	2.1989	0	0.976982	0.988574	1.11e-06	5.55e-06	ENSG00000242762	9838	6_Weak_transcription	0	0	0	0	0	0	0	0	Mxi1_known1|0|11.953978622428|6|+|-0.0364874651680012|11.91749115726
rs4881099	10:3168857-3169700	10	3169024	T	C	0.736842	0.655306	1	1	23.6862	0.661166	0.000857	0.492464	26.3687	5.4699	5	5	10.6863	0	0.996449	0.995593	1.13e-06	5.67e-06	ENSG00000237399	-15008	10_Active_enhancer_2	1	1	1	0	1	1	1	0	NF-kappaB_known1|0|11.88374862703|10|+|0.40837841997201|12.292127047002
rs17724172	18:3511970-3512449	18	3512216	T	C	0.184211	0.968783	1	1	23.6763	0.255915	4.7e-05	0.482825	17.8584	3.49644	3	5	0.301527	0	0.991634	0.990267	1.14e-06	5.7e-06	ENSG00000245855	15938	17_Weak_repressed_polycomb	0	0	0	0	0	0	0	1	Foxi1|0|-11.966200270464|8|+|11.73886859036|-0.227331680104001
rs4857221	3:96423735-96424342	3	96423841	C	G	0.210526	0.0475	0.997315	0.997315	21.907	0.753771	0.000129	0.531527	20.2838	4.05199	3	2	0	0	0.957741	0.991044	2.86e-06	5.72e-06	ENSG00000212031	-38612	18_Quiescent/low_signal	1	0	0	0	0	0	0	0	NA
rs138986851	1:1821529-1823280	1	1823093	C	C	0.526316	4.33716	0.965302	0.965302	24.2128	0.659736	0.001619	0.577698	34.4918	5.62878	5	7	18.1847	0	0.795481	0.893407	8.63e-07	6.04e-06	ENSG00000078369	966	1_Active_TSS	0	0	0	0	1	1	0	0	NA
rs1867762	2:113922724-113923326	2	113922924	T	G	0.289474	2.46609	1	1	24.1532	0.313299	0.000998	0.385763	22.4482	4.78783	9	7	0.04311	0	0.980876	0.996159	8.9e-07	6.23e-06	ENSG00000125637	7821	10_Active_enhancer_2	1	1	1	1	1	1	1	1	BDP1_disc1|0|-3.08377682958201|15|+|1.89304713041801|-1.190729699164
rs7016596	8:6171075-6171493	8	6171375	G	C	0.078947	0.139592	1	1	23.8532	0.722225	0.002237	0.440831	25.7716	3.81885	7	6	9.99845	0	0.962266	0.985028	1.04e-06	6.24e-06	ENSG00000246089	92994	17_Weak_repressed_polycomb	0	0	0	0	0	0	0	0	NF-kappaB_known1|0|11.796341234776|4|-|-0.500965152074002|11.295376082702
rs10494931	1:211187232-211187860	1	211187730	C	T	0.447368	1.23453	1	1	24.0602	0.26421	3.4e-05	0.560268	10.1727	3.48203	7	7	0.456898	0	0.993145	0.992663	9.34e-07	6.54e-06	ENSG00000234233	119484	10_Active_enhancer_2	0	0	0	0	0	0	0	0	p300_disc3|0|-2.08997850107299|2|-|11.766177402908|9.67619890183501
rs12795997	11:124171136-124171805	11	124171574	G	C	0.394737	3.83512	1	1	20.3208	0.234438	0.000119	0.386782	7.80065	3.70089	1	1	0	0	0.994855	0.994855	6.55e-06	6.55e-06	ENSG00000196341	9526	18_Quiescent/low_signal	1	1	0	0	0	0	1	0	Bach2|0|-11.909565840986|8|-|12.97859517715|1.06902933616399
rs4750115	10:11834900-11835163	10	11834968	A	G	0.368421	6.46528	0.927972	0.927972	23.4068	0.310762	0.010975	0.345659	10.5207	2.57942	5	5	3.42398	0	0.883314	0.739459	1.31e-06	6.56e-06	ENSG00000148426	-30439	17_Weak_repressed_polycomb	0	0	0	1	0	0	0	0	NA
rs7668750	4:177804152-177805562	4	177804746	C	T	0.736842	2.42347	1	1	23.3652	0.683966	0.003385	0.537118	13.2365	5.60196	6	5	0.694674	0	0.982568	0.983532	1.34e-06	6.7e-06	ENSG00000150630	-90257	10_Active_enhancer_2	1	1	0	0	0	0	1	1	NA
rs6876431	5:55434191-55434625	5	55434432	A	G	0.315789	0.902531	0.992745	0.992745	21.5838	0.768816	0.015422	0.649437	11.1904	3.08254	2	2	0	0	0.908524	0.968989	3.39e-06	6.77e-06	ENSG00000243592	1384	18_Quiescent/low_signal	1	1	0	0	0	0	0	0	SRF_known6|0|11.966142397916|13|+|0.343702256810005|12.309844654726
rs11609491	12:104899222-104899652	12	104899352	C	T	0.315789	0.902531	1	1	21.5529	0.271696	0.006035	0.501164	20.1663	3.92755	2	2	1.12351	0	0.994924	0.993965	3.44e-06	6.88e-06	ENSG00000247640	-24437	11_Weak_enhancer	1	1	0	0	0	0	0	0	Bach1|0|-11.96610935299|10|+|10.18845343582|-1.77765591716999
rs72745334	9:104352366-104352614	9	104352494	C	T	0.157895	0.667969	0.999802	0.999802	21.5203	0.297296	2.5e-05	0.535	35.6123	3.60897	2	2	2.71133	0	0.995457	0.990551	3.5e-06	7e-06	ENSG00000188386	4917	17_Weak_repressed_polycomb	0	0	0	0	0	0	0	0	Nrf-2_2|0|-11.644308320337|11|+|11.521005667849|-0.123302652488007
rs7790957	7:12471425-12472001	7	12471770	G	T	0.236842	1.82996	0.976612	0.976612	23.6258	0.799151	0.001238	0.688193	8.44257	4.50524	7	6	1.33569	0	0.942968	0.769335	1.17e-06	7.02e-06	ENSG00000146530	-27573	18_Quiescent/low_signal	1	0	1	0	1	1	0	1	Maf_disc1|0|11.966205271608|10|-|-5.04519212085999|6.921013150748
rs57930203	19:48693788-48693939	19	48693928	C	G	0.605263	3.83512	1	1	20.1638	0.214545	0.000298	0.392168	10.8278	2.70341	1	1	0	0	0.994209	0.994209	7.11e-06	7.11e-06	ENSG00000196223	13421	6_Weak_transcription	0	0	0	0	0	0	0	0	E2F_known1|0|-11.96611033293|7|-|12.37693944277|0.410829109839995
rs6921948	6:31170917-31172119	6	31171257	A	C	0.605263	0.001437	1	1	25.2123	0.369169	0.000431	0.434336	19.6788	5.57004	14	14	5.20118	0	0.992039	0.995855	5.14e-07	7.19e-06	ENSG00000232703	-1222	9_Active_enhancer_1	1	1	0	0	1	1	1	0	Foxc1_1|0|-11.966106118866|7|-|6.397695239157|-5.56841087970901
rs1115253	14:90116638-90117362	14	90117111	C	T	0.289474	0.43618	1	1	22.2277	0.74495	8.3e-05	0.556702	11.7054	3.59637	2	3	15.6915	0	0.926761	0.987093	2.42e-06	7.26e-06	ENSG00000201027	28375	6_Weak_transcription	0	0	0	0	0	0	0	0	AP-1_known2|0|11.603672840258|5|+|0.493379159742005|12.097052
rs12692777	2:166622942-166623352	2	166623188	T	A	0.421053	0.353306	0.991091	0.991091	20.116	0.766419	0.014103	0.640303	7.31373	3.27139	2	1	0	0	0.991736	0.987172	7.29e-06	7.29e-06	ENSG00000115339	28250	6_Weak_transcription	1	0	0	0	0	0	0	0	NA
rs112705584	17:18128621-18129227	17	18128854	G	T	0.157895	0.667969	0.979915	0.979915	22.1762	0.618699	0.002294	0.464271	34.7485	5.14266	3	3	4.42071	0	0.988013	0.9687	2.49e-06	7.46e-06	ENSG00000131899	-281	1_Active_TSS	0	0	0	0	1	0	0	0	UF1H3BETA|0|9.797450989704|10|-|-9.848709266848|-0.0512582771440009
rs1832237	13:65338145-65338689	13	65338535	G	A	0.526316	0.459753	0.999262	0.999262	22.729	0.276021	0.004536	0.377583	14.1295	3.95245	4	4	0.440734	0	0.966024	0.915834	1.87e-06	7.46e-06	ENSG00000214269	195470	18_Quiescent/low_signal	1	0	0	0	0	0	0	0	Nr2e3|0|-1.262079060597|1|-|12.990049|11.727969939403
rs2612284	3:96737527-96737850	3	96737790	A	G	0.210526	0.0475	0.99187	0.99187	20.06	0.800825	0.000174	0.684104	11.1033	3.38333	1	1	0	0	0.984288	0.984288	7.5e-06	7.5e-06	ENSG00000080224	204096	18_Quiescent/low_signal	0	0	0	1	0	0	0	0	CTCF_disc1|0|11.954391201531|20|+|-0.023400920052012|11.930990281479
rs8095594	18:41022469-41023056	18	41022827	A	G	0.289474	0.206997	1	1	22.6712	0.672207	0.00461	0.398889	21.2621	4.14255	5	4	3.11182	0	0.994863	0.994744	1.92e-06	7.69e-06	ENSG00000132872	-164854	18_Quiescent/low_signal	0	0	0	0	0	0	0	1	Myc_known5|0|11.59196251324|4|-|0.696373109817991|12.288335623058
rs73160463	3:149996318-149997154	3	149996798	C	A	0.289474	0.206997	0.999872	0.999872	22.6091	0.683626	1.8e-05	0.545195	20.4743	4.77952	3	4	0.171561	0	0.969631	0.995469	1.99e-06	7.94e-06	ENSG00000243550	8842	10_Active_enhancer_2	1	0	0	0	1	0	1	0	p300_disc3|0|11.134909253178|8|-|2.26490818166999|13.399817434848
rs7125750	11:22702058-22703036	11	22702397	G	C	0.447368	0.554724	0.999894	0.999894	23.936	0.341995	0.002152	0.408179	24.2675	4.47713	7	8	0.462189	0	0.920461	0.994438	9.96e-07	7.97e-06	ENSG00000222427	-7840	10_Active_enhancer_2	1	0	0	0	0	0	0	1	HNF4_known3|0|-8.270017457996|12|-|14.767648112372|6.497630654376
rs72784647	2:8745805-8746115	2	8745931	C	T	0.105263	0.262976	0.999721	0.999721	21.2731	0.231645	3e-05	0.55989	17.9097	3.20787	2	2	9.66236	0	0.995593	0.983972	3.98e-06	7.97e-06	ENSG00000225642	2592	18_Quiescent/low_signal	1	0	0	0	0	0	1	0	NA
rs140978644	6:99318780-99319302	6	99318948	ACT	A	0.236842	0.006973	0.998982	0.998982	23.0216	0.688775	0.004193	0.568024	14.8701	3.73967	3	5	2.33591	0	0.975489	0.988745	1.6e-06	8.01e-06	ENSG00000231786	-33736	6_Weak_transcription	0	1	0	0	0	0	0	0	Irf_disc3|0|6.11636023529999|4|-|-11.5318137186|-5.41545348330001
rs10941891	5:21391730-21392031	5	21391789	G	C	0.684211	0.902531	0.81056	0.81056	19.9298	0.218167	0.012541	0.384591	10.9518	3.35693	2	1	0	0	0.899711	0.665815	8.03e-06	8.03e-06	ENSG00000183666	-67860	18_Quiescent/low_signal	0	0	0	1	0	0	0	0	Rad21_disc4|0|-11.63866215116|9|+|15.85922646716|4.22056431600001
rs41518444	4:157299202-157299801	4	157299450	C	G	0.368421	0.325822	0.999661	0.999661	22.5633	0.280813	2.2e-05	0.369579	17.1855	3.88728	3	4	1.8581	0	0.996395	0.993777	2.03e-06	8.13e-06	ENSG00000221189	-81404	18_Quiescent/low_signal	1	0	0	1	1	0	0	0	CTCF_known1|0|-11.9533764651|10|-|9.83023784780801|-2.123138617292
rs1026677	4:71751010-71751323	4	71751095	G	C	0.868421	1.81521	0.99977	0.99977	19.8403	0.228953	6.9e-05	0.458924	25.6758	3.59454	2	1	0.170813	0	0.997471	0.992864	8.42e-06	8.42e-06	ENSG00000173542	-17055	6_Weak_transcription	1	0	0	0	0	0	0	0	CTCF_known1|0|-3.189799964922|3|+|9.916772167096|6.726972202174
rs78306866	6:29909865-29911146	6	29910742	G	C	0.789474	1.35111	0.98862	0.98862	28.7296	0.433882	0.00329	0.463589	7.18691	5.87508	107	102	9.33322	0	0.962367	0.979544	8.32e-08	8.49e-06	ENSG00000227766	979	1_Active_TSS	0	0	0	1	1	1	0	1	NA
rs10953314	7:100634994-100636157	7	100635679	C	G	0.368421	0.172336	0.980225	0.980225	24.2419	0.665693	0.005188	0.349887	24.0934	3.82697	10	10	2.41534	0	0.938179	0.967988	8.5e-07	8.5e-06	ENSG00000205277	22089	17_Weak_repressed_polycomb	0	0	0	0	0	0	0	0	Myf_1|0|11.966144000832|4|-|4.99092805296|16.957072053792
rs4415601	1:108304841-108305164	1	108304878	G	T	0.605263	0.001437	0.99989	0.99989	22.4596	0.78656	0.005115	0.443862	9.50333	3.35431	4	4	0	0	0.961375	0.995089	2.15e-06	8.58e-06	ENSG00000246708	190913	10_Active_enhancer_2	0	0	0	0	0	0	1	0	HMG-IY_2|0|0.873787655384007|15|+|9.80381599253199|10.677603647916
rs4621583	5:121248959-121249756	5	121249306	C	A	0.631579	0.325822	1	1	21.1259	0.266038	3.9e-05	0.297109	8.81274	5.2838	2	2	0	0	0.995011	0.99505	4.3e-06	8.6e-06	ENSG00000151304	-48698	18_Quiescent/low_signal	0	1	0	0	0	0	1	0	NA
rs4895717	6:147972339-147973475	6	147973233	A	T	0.131579	0.43618	1	1	24.0028	0.290607	0.001602	0.441218	8.6292	4.75581	7	9	34.7638	0	0.994684	0.95953	9.62e-07	8.66e-06	ENSG00000227681	-9501	10_Active_enhancer_2	1	1	1	1	1	1	1	1	Irf_known1|0|-11.96610613341|5|+|7.03286833119|-4.93323780221999
rs2727965	3:1894305-1894921	3	1894541	A	G	0.578947	0.120222	1	1	21.8401	0.320351	3.4e-05	0.522156	10.8991	3.68759	5	3	2.60706	0	0.993859	0.994407	2.96e-06	8.89e-06	ENSG00000214073	-53031	18_Quiescent/low_signal	1	1	0	0	0	0	1	1	GR_known4|0|-2.26088182538601|17|-|11.342717880756|9.08183605536999
rs7520201	1:246206679-246207301	1	246207215	G	T	0.394737	0.85067	0.994366	0.994366	21.8395	0.23997	0.003715	0.465958	11.5997	4.43016	3	3	0	0	0.977202	0.968536	2.96e-06	8.89e-06	ENSG00000235096	9825	18_Quiescent/low_signal	1	1	0	0	0	0	1	1	1
rs254415	5:77071425-77072538	5	77071703	G	T	0.289474	3.15363	0.981301	0.981301	21.8136	0.578421	0.000914	0.53493	53.4784	6.45747	3	3	7.12894	0	0.979304	0.957179	3e-06	9.01e-06	ENSG00000171530	760	1_Active_TSS	0	0	0	1	1	1	0	1	NA
rs17127787	14:55166023-55166225	14	55166115	A	G	0.263158	0.139592	0.920314	0.920314	21.0152	0.252925	2.9e-05	0.407096	19.976	3.57767	2	2	0	0	0.909861	0.871553	4.56e-06	9.11e-06	ENSG00000020577	131385	6_Weak_transcription	0	0	0	0	0	0	0	0	AP-1_disc1|0|-11.966057581368|2|-|10.13030863064|-1.835748950728
rs73801666	4:21537481-21538171	4	21537757	G	T	0.078947	0.139592	1	1	22.7245	0.257348	0.001709	0.395052	13.3042	4.78605	5	5	3.99785	0	0.994897	0.984743	1.87e-06	9.35e-06	ENSG00000242768	121011	10_Active_enhancer_2	1	1	0	0	1	0	0	1	TEF-1_2|0|-9.383086572208|1|+|10.753748954892|1.37066238268399
rs4757695	11:18690138-18690380	11	18690219	C	T	0.447368	0.033543	1	1	19.6072	0.714704	8.4e-05	0.560138	17.3342	3.61353	1	1	0	0	0.995874	0.995874	9.51e-06	9.51e-06	ENSG00000151117	-30214	18_Quiescent/low_signal	0	0	1	1	1	1	0	0	MIF-1|0|11.966186889734|5|+|-13.420213210137|-1.45402632040299
rs9330298	1:153590024-153590293	1	153590254	C	A	0.526316	0.459753	1	1	19.6073	0.249389	0.000162	0.393325	16.036	3.05346	1	1	0.252071	0	0.993595	0.993595	9.51e-06	9.51e-06	ENSG00000189334	-562	10_Active_enhancer_2	0	0	0	1	0	0	0	0	1
rs4957536	5:106620672-106621347	5	106620970	G	T	0.342105	0.626168	0.999533	0.999533	19.5404	0.311349	3e-05	0.302144	13.6644	4.97222	2	1	0	0	0.99131	0.99493	9.85e-06	9.85e-06	ENSG00000247383	-384191	18_Quiescent/low_signal	1	0	0	0	1	0	1	1	DMRT1|0|-11.966105135|3|+|9.05902703933802|-2.907078095662
rs7971167	12:69517427-69518195	12	69517970	C	T	0.763158	1.82996	0.969804	0.969804	22.1854	0.695992	0.001336	0.562175	26.0173	3.92646	4	4	1.52475	0	0.974309	0.932342	2.48e-06	9.9e-06	ENSG00000221422	76552	11_Weak_enhancer	1	0	1	0	0	0	0	0	Foxa_known4|0|10.481341990056|15|+|0.883039326772007|11.364381316828
rs877593	22:26867494-26867814	22	26867655	C	T	0.842105	0.824653	0.999407	0.999407	19.5017	0.781103	8.2e-05	0.549035	10.2547	3.57895	1	1	0	0	0.987911	0.987911	1.01e-05	1.01e-05	ENSG00000100099	12326	5_Strong_transcription	1	0	0	0	0	1	0	0	Maf_disc1|0|11.966094761964|8|+|-5.31207291112|6.654021850844
rs62354551	5:53787278-53787456	5	53787353	C	T	0.236842	0.006973	1	1	20.7806	0.779007	0.000103	0.654774	10.9283	3.3957	2	2	0	0	0.995711	0.993342	5.15e-06	1.03e-05	ENSG00000178996	-26312	18_Quiescent/low_signal	1	0	0	0	0	0	0	0	TCF11::MafG|0|0.736406546666018|20|-|8.193114531752|8.92952107841802
rs12269414	10:65631993-65632490	10	65632274	G	A	0.184211	0.968783	0.999825	0.999825	21.502	0.216636	0.005041	0.265089	12.2639	4.09207	3	3	12.0556	0	0.955051	0.979551	3.53e-06	1.06e-05	ENSG00000213609	31021	17_Weak_repressed_polycomb	0	0	0	1	0	0	0	0	CTCF_disc2|0|-11.966227810912|8|+|4.369587250112|-7.59664056080001
rs7733723	5:145040696-145041317	5	145041065	C	T	0.236842	1.40601	1	1	22.4443	0.202394	0.004163	0.371605	7.99681	4.25275	4	5	0	0	0.971126	0.994979	2.16e-06	1.08e-05	ENSG00000186314	174203	10_Active_enhancer_2	1	1	0	0	1	0	1	1	NA
rs12576583	11:110934380-110935178	11	110934956	G	C	0.131579	0.43618	0.99702	0.99702	19.2869	0.693365	2.8e-05	0.632877	41.226	4.79411	2	1	0	0	0.978379	0.987544	1.12e-05	1.12e-05	ENSG00000200168	-23448	17_Weak_repressed_polycomb	1	1	1	0	0	0	1	1	PRDM1_known1|0|11.96610736867|8|-|-5.00216649117499|6.96394087749499
rs1515966	2:17216245-17216623	2	17216459	T	C	0.210526	0.0475	1	1	21.3941	0.691224	0.0038	0.616152	23.6084	3.26797	3	3	2.01111	0	0.991148	0.993812	3.74e-06	1.12e-05	ENSG00000237670	64943	18_Quiescent/low_signal	1	1	0	0	0	0	0	0	ATF3_known4|0|11.966125147236|11|-|-1.93573993583199|10.030385211404
rs7543389	1:59680295-59680883	1	59680536	A	G	0.342105	1.5558	1	1	20.6105	0.674585	3.7e-05	0.652847	15.0105	4.32412	2	2	16.1077	0	0.988572	0.988138	5.63e-06	1.13e-05	ENSG00000224609	-16002	10_Active_enhancer_2	1	1	1	0	1	1	1	0	NA
rs28654998	5:106361643-106362232	5	106362025	G	T	0.236842	0.006973	0.999564	0.999564	21.3255	0.266744	0.00276	0.605628	8.7839	4.72731	4	3	6.11114	0	0.975694	0.993635	3.88e-06	1.16e-05	ENSG00000240182	472491	18_Quiescent/low_signal	1	0	0	0	0	0	1	0	RFX5_disc1|0|-11.966140594553|2|-|12.557411921996|0.591271327442996
rs3837101	7:38885895-38886119	7	38885997	T	TG	0.578947	2.35783	0.999676	0.999676	20.4942	0.271551	0.000149	0.45453	21.6015	3.25828	1	2	0	0	0.990805	0.993722	5.98e-06	1.2e-05	ENSG00000246010	56250	6_Weak_transcription	0	0	0	0	0	0	0	0	AP-1_disc3|0|-23.049351065464|2|+|15.864145259086|-7.18520580637799
rs10740097	10:64684135-64684560	10	64684455	C	T	0.763158	0.006973	0.999854	0.999854	20.458	0.263618	7.4e-05	0.401404	12.2233	4.1503	2	2	0.385477	0	0.990687	0.991798	6.1e-06	1.22e-05	ENSG00000122877	-4475	18_Quiescent/low_signal	0	0	0	0	0	0	0	0	HEN1_2|0|-10.600345323573|2|-|12.206723852008|1.606378528435
rs274567	5:131714098-131714627	5	131714409	C	T	0.394737	3.54395	1	1	21.1979	0.654085	1e-05	0.460504	17.0765	5.22031	3	3	9.75513	0	0.992075	0.992665	4.14e-06	1.24e-05	ENSG00000233006	-8490	10_Active_enhancer_2	1	0	1	0	1	1	1	1	NA
rs34338677	4:187037542-187037819	4	187037614	G	T	0.342105	0.626168	1	1	21.1885	0.739183	0.007393	0.485968	7.24044	2.58708	4	3	0	0	0.994091	0.994578	4.16e-06	1.25e-05	ENSG00000109794	11310	6_Weak_transcription	0	0	0	0	0	0	0	0	CEBPG|0|10.159639419388|1|+|2.257843746558|12.417483165946
rs34571831	13:109407196-109407801	13	109407376	G	T	0.184211	0.294145	1	1	21.1631	0.704325	0.000125	0.548468	43.2575	4.22686	2	3	0	0	0.992385	0.993529	4.22e-06	1.27e-05	ENSG00000041515	158695	18_Quiescent/low_signal	0	0	0	0	0	0	0	1	Hoxa13|0|10.527263893836|10|-|1.490064632404|12.01732852624
rs12933059	16:84208985-84209244	16	84209049	C	T	0.368421	0.172336	1	1	22.7693	0.219741	3.1e-05	0.488523	6.34914	2.86588	7	7	0.905046	0	0.985368	0.993979	1.83e-06	1.28e-05	ENSG00000103168	11677	6_Weak_transcription	0	0	0	1	0	0	0	0	CACD_1|0|-11.966218741888|13|-|14.795935164288|2.8297164224
rs13141932	4:4845531-4845998	4	4845831	C	T	0.421053	0.120222	0.985373	0.985373	21.6758	0.373983	1.4e-05	0.515016	25.1204	3.99495	7	4	5.81882	0	0.967869	0.979267	3.23e-06	1.29e-05	ENSG00000246070	-8096	17_Weak_repressed_polycomb	0	0	1	0	1	0	0	1	NA
rs1458937	18:56790883-56791537	18	56791241	G	T	0.263158	2.42347	1	1	21.0969	0.321996	2.2e-05	0.521647	18.1163	4.87441	3	3	1.29686	0	0.971109	0.927221	4.37e-06	1.31e-05	ENSG00000166562	-16205	17_Weak_repressed_polycomb	0	0	1	0	0	1	1	1	ZEB1_known2|0|-10.703593373932|3|-|11.297072700924|0.593479326991996
rs16864736	2:177796574-177796840	2	177796683	G	T	0.578947	0.353306	1	1	21.0696	0.286649	0.00698	0.468666	17.9388	3.2268	3	3	0	0	0.992323	0.990343	4.43e-06	1.33e-05	ENSG00000206866	-1756	17_Weak_repressed_polycomb	1	0	0	0	0	0	0	0	Nrf-2_3|0|-11.73179571578|5|-|12.30815151108|0.576355795299989
rs4634634	8:74268480-74269064	8	74268826	C	T	0.184211	0.968783	0.999825	0.999825	22.0418	0.633294	1e-05	0.465184	15.1718	5.96673	5	5	8.74426	0	0.991901	0.991453	2.67e-06	1.33e-05	ENSG00000147604	-55177	10_Active_enhancer_2	0	0	1	0	1	1	0	0	CCNT2_disc1|0|1.77150896293701|20|+|12.338470064057|14.109979026994
rs2250117	10:19458539-19459009	10	19458804	T	A	0.815789	0.294145	0.996851	0.996851	20.2456	0.748831	0.005108	0.608356	9.60189	4.1235	2	2	0	0	0.99663	0.990899	6.81e-06	1.36e-05	ENSG00000204740	-34241	17_Weak_repressed_polycomb	1	0	0	0	0	0	0	0	GATA_disc6|0|11.966206541456|3|-|-0.48029431193801|11.485912229518
rs6439443	3:133540652-133541240	3	133540915	T	C	0.710526	0.43618	0.997963	0.997963	21.5639	0.72852	1.6e-05	0.56971	16.1272	3.81974	5	4	4.24233	0	0.984432	0.989496	3.42e-06	1.37e-05	ENSG00000144867	37774	5_Strong_transcription	0	0	0	1	0	0	0	0	CTCF_disc2|0|11.966097720594|5|-|-7.04935059297401|4.91674712761998
rs10141114	14:77842855-77843966	14	77843363	A	G	0.157895	0.667969	0.96353	0.96353	21.5502	0.394296	0.002754	0.491121	36.8831	5.79344	7	4	3.21347	0	0.958907	0.942384	3.45e-06	1.38e-05	ENSG00000100580	597	1_Active_TSS	0	0	0	1	1	1	0	0	HEY1_disc2|0|-0.157748163205994|9|+|10.680490256678|10.522742093472
rs1155866	4:67733462-67734017	4	67733903	T	G	0.605263	0.996253	0.99934	0.99934	21.5534	0.32916	0.002003	0.436456	26.2296	4.18813	5	4	0	0	0.995652	0.994925	3.44e-06	1.38e-05	ENSG00000244099	436651	18_Quiescent/low_signal	1	0	0	0	1	0	0	1	RFX5_disc1|0|-11.271640936567|5|-|14.020999249107|2.74935831254
rs2424962	20:31693910-31694228	20	31694114	A	G	0.394737	3.83512	0.97828	0.97828	21.0006	0.296379	0.004643	0.412617	9.49493	3.31293	3	3	0	0	0.981226	0.981692	4.59e-06	1.38e-05	ENSG00000186191	26459	10_Active_enhancer_2	1	1	0	0	1	1	1	0	p300_disc3|0|-11.700653049474|4|-|11.811678115207|0.111025065733003
rs2360240	8:53744673-53744913	8	53744830	A	T	0.5	0.052632	1	1	18.889	0.766876	0.000187	0.637266	8.03951	3.03557	1	1	0	0	0.995393	0.995393	1.39e-05	1.39e-05	ENSG00000183729	-106321	17_Weak_repressed_polycomb	0	0	0	0	0	0	0	0	Foxd1_1|0|11.966138526682|8|+|-6.22855782580699|5.73758070087501
rs28373331	8:74014066-74014562	8	74014380	T	C	0.342105	1.5558	0.985254	0.985254	20.2028	0.750633	0.000162	0.530749	12.2121	3.67183	2	2	0	0	0.942378	0.911269	6.97e-06	1.39e-05	ENSG00000164764	-8559	17_Weak_repressed_polycomb	1	0	0	0	0	0	0	0	E2A_1|0|11.966146500316|10|-|-0.352425474330985|11.613721025985
rs6937795	6:137290476-137291460	6	137291281	A	C	0.552632	0.554724	0.977675	0.977675	21.9492	0.347157	0.001222	0.475347	15.1007	5.15276	6	5	1.84096	0	0.975655	0.964143	2.8e-06	1.4e-05	ENSG00000230350	4878	10_Active_enhancer_2	1	1	0	0	1	1	1	1	Hoxb6|0|-1.721403293744|14|+|11.358411607296|9.637008313552
rs61631854	2:212377486-212378251	2	212377672	C	T	0.131579	0.43618	0.99977	0.99977	21.5014	0.258144	3.1e-05	0.522137	21.4728	3.49889	5	4	0.676462	0	0.903918	0.988148	3.54e-06	1.41e-05	ENSG00000199585	-22893	18_Quiescent/low_signal	0	0	0	0	1	1	1	0	Foxo_2|0|-11.96621550875|6|-|11.22778427321|-0.738431235540006
rs9843619	3:19930538-19931271	3	19930761	G	C	0.394737	0.001437	1	1	21.9386	0.659289	0.001656	0.54903	18.0337	5.4489	7	5	0	0	0.990824	0.995853	2.82e-06	1.41e-05	ENSG00000232953	54264	10_Active_enhancer_2	1	0	0	0	1	0	0	1	Sin3Ak-20_disc6|0|0.603511943982014|2|+|9.78042182680799|10.38393377079
rs640179	18:47384743-47385563	18	47385014	G	A	0.526316	0.058642	0.99895	0.99895	20.1656	0.320045	0.0001	0.328913	23.5013	4.35734	2	2	0.601125	0	0.992624	0.993805	7.1e-06	1.42e-05	ENSG00000201668	13293	10_Active_enhancer_2	1	0	0	1	1	1	1	0	Elf5|0|-11.966180704542|4|+|11.918559512482|-0.0476211920599994
rs10866211	4:178142743-178143486	4	178142885	G	A	0.684211	1.37722	1	1	22.2555	0.691677	1.7e-05	0.556012	15.7604	4.06351	7	6	9.14533	0	0.994945	0.990217	2.39e-06	1.43e-05	ENSG00000222859	40146	18_Quiescent/low_signal	1	0	0	0	0	0	0	1	NA
rs312143	12:105089350-105089890	12	105089782	A	G	0.368421	0.172336	1	1	20.9233	0.319871	4.8e-05	0.444823	16.508	3.52566	4	3	9.98709	0	0.9027	0.992337	4.78e-06	1.43e-05	ENSG00000246254	143498	11_Weak_enhancer	1	0	0	0	0	0	0	0	TATA_disc7|0|-1.417586468796|3|+|11.259568785946|9.84198231715
rs1109086	17:64948072-64948506	17	64948285	A	G	0.105263	3.6981	0.999164	0.999164	18.7739	0.245243	7.2e-05	0.409375	14.2446	3.6047	1	1	0.594661	0	0.99149	0.99149	1.47e-05	1.47e-05	ENSG00000075461	-12942	6_Weak_transcription	1	0	0	0	0	0	0	0	Bach1|0|-11.96622056942|7|+|10.17088123988|-1.79533932954
rs7149829	14:40862276-40863031	14	40862461	T	C	0.421053	1.65857	1	1	22.2022	0.631376	0.005392	0.454348	18.8737	5.95669	6	6	9.57834	0	0.993906	0.99419	2.45e-06	1.47e-05	ENSG00000221695	-956222	10_Active_enhancer_2	1	1	0	0	0	1	1	0	Bach1|0|11.96610935299|10|+|-4.54505434485999|7.42105500813001
rs12466799	2:113835591-113836503	2	113835999	T	C	0.631579	1.96301	0.975847	0.975847	22.962	0.294076	0.00171	0.488917	17.9383	4.74136	8	9	0	0	0.989455	0.97179	1.65e-06	1.49e-05	ENSG00000201805	-8792	10_Active_enhancer_2	1	0	0	0	0	0	0	0	Rad21_disc10|0|-11.399593567675|3|-|12.102315345359|0.702721777684005
rs17636630	6:120201908-120202410	6	120202190	A	G	0.289474	0.43618	1	1	21.3926	0.303631	0.010379	0.293095	21.0319	3.59437	5	4	0.932503	0	0.97212	0.992991	3.74e-06	1.5e-05	ENSG00000241376	-381525	18_Quiescent/low_signal	0	0	0	0	0	0	0	0	AP-1_disc3|0|-11.96616527103|6|-|10.441941987584|-1.52422328344599
rs4689145	4:7632343-7633256	4	7632902	G	A	0.394737	0.001437	1	1	21.7869	0.308788	2.7e-05	0.45465	8.40047	4.58478	5	5	10.9825	0	0.987164	0.994261	3.05e-06	1.52e-05	ENSG00000239735	48155	17_Weak_repressed_polycomb	0	1	1	0	0	1	0	0	ATF3_disc2|0|-6.56485027164001|14|+|10.65263251103|4.08778223938999
rs2030527	3:70313217-70314203	3	70313844	G	A	0.157895	0.667969	1	1	21.345	0.651058	0.002679	0.502794	17.3071	5.82283	4	4	1.4735	0	0.985257	0.990781	3.84e-06	1.53e-05	ENSG00000222615	-12321	10_Active_enhancer_2	1	1	0	0	0	0	1	0	Mrg_1|0|4.79629706253502|7|-|7.74424597749399|12.540543040029
rs79786949	3:188069935-188070636	3	188070274	T	C	0.078947	7.73614	0.99747	0.99747	21.6617	0.196257	8e-06	0.546536	8.32783	4.68347	6	5	0.694515	0	0.873324	0.975327	3.25e-06	1.63e-05	ENSG00000236479	171829	10_Active_enhancer_2	1	0	0	0	1	1	0	1	NA
rs2466889	12:22980799-22981368	12	22981261	A	G	0.5	0.052632	0.99979	0.99979	21.2134	0.330648	0.001666	0.461326	15.6748	4.27882	6	4	0	0	0.98215	0.996039	4.11e-06	1.64e-05	ENSG00000241451	105635	18_Quiescent/low_signal	1	0	0	0	0	0	0	0	HDAC2_disc2|0|-11.966217638736|8|+|12.197014170448|0.230796531712002
NA	3:98410644-98411313	3	98410648	C	<	0.368421	1.96301	0.986487	0.986487	20.6629	0.154287	0.008314	0.360307	4.31363	4.4277	3	3	0	0	0.976946	0.983009	5.48e-06	1.64e-05	ENSG00000244153	33997	18_Quiescent/low_signal	0	1	0	0	0	0	1	0	NA
rs34343698	3:16255867-16256187	3	16256034	C	G	0.157895	0.824653	1	1	20.644	0.77102	3.6e-05	0.496379	15.0029	3.82298	4	3	0.109432	0	0.993599	0.993786	5.53e-06	1.66e-05	ENSG00000131386	39710	17_Weak_repressed_polycomb	1	0	0	0	0	0	0	0	Mef2_known5|0|5.597019326349|8|-|0.697906418655009|6.29492574500401
rs10518387	4:122265336-122265744	4	122265446	G	A	0.368421	1.96301	0.999887	0.999887	19.7821	0.30791	7e-05	0.309156	24.7739	3.42448	2	2	1.03923	0	0.994932	0.995377	8.68e-06	1.74e-05	ENSG00000207148	-15011	17_Weak_repressed_polycomb	1	0	0	0	0	0	0	0	E4F1|0|-11.966107434624|6|+|5.736139049128|-6.22996838549599
rs8075429	17:3906747-3907364	17	3907308	A	G	0.526316	1.35111	1	1	21.0957	0.223238	0.009929	0.343087	10.1666	3.52826	3	4	0	0	0.992167	0.988565	4.37e-06	1.75e-05	ENSG00000235393	-1004	10_Active_enhancer_2	0	0	0	0	0	0	0	0	HNF4_disc1|0|-2.784746006619|7|-|13.481876988922|10.697130982303
rs7826761	8:74459013-74459924	8	74459476	G	A	0.394737	0.001437	0.99989	0.99989	21.8585	0.659224	2.6e-05	0.564668	18.161	4.22821	5	6	0	0	0.995389	0.99572	2.94e-06	1.76e-05	ENSG00000246589	-198145	6_Weak_transcription	1	0	0	0	0	1	0	0	NA
rs1566378	11:22774451-22774926	11	22774799	A	C	0.578947	0.353306	0.997202	0.997202	18.3954	0.311297	7.3e-05	0.348459	14.2033	4.36362	1	1	0	0	0.9946	0.9946	1.79e-05	1.79e-05	ENSG00000203507	8146	18_Quiescent/low_signal	1	1	0	0	1	1	1	0	Foxf2|0|-11.966157240619|8|+|11.148925911967|-0.817231328651999
rs1888214	9:124952986-124953118	9	124953019	A	G	0.526316	0.058642	1	1	18.386	0.270419	0.00022	0.491677	20.5796	2.72581	1	1	0	0	0.995466	0.995466	1.8e-05	1.8e-05	ENSG00000185681	30795	17_Weak_repressed_polycomb	1	0	0	0	0	0	0	0	Foxa_known3|0|-9.38930188266001|3|-|11.514544153855|2.12524227119501
rs4937891	11:134323453-134323723	11	134323597	C	T	0.578947	0.120222	1	1	19.6841	0.301939	0.000202	0.482491	15.9742	2.90715	2	2	1.65473	0	0.992913	0.992315	9.14e-06	1.83e-05	ENSG00000216049	-2720	17_Weak_repressed_polycomb	0	0	0	0	0	0	0	0	Hic1_1|0|-3.04046837110801|11|+|12.448522495488|9.40805412438
rs13157472	5:136976800-136977293	5	136977067	G	C	0.368421	0.172336	0.986964	0.986964	18.3381	0.291948	0.000145	0.338771	17.6818	3.47312	1	1	0	0	0.98056	0.98056	1.85e-05	1.85e-05	ENSG00000216009	6538	6_Weak_transcription	1	0	0	0	0	0	0	0	NA
rs800736	2:229729753-229730257	2	229729917	G	A	0.394737	3.83512	0.97257	0.97257	18.3197	0.269786	7.7e-05	0.41165	10.8762	3.8664	1	1	0	0	0.936684	0.936684	1.87e-05	1.87e-05	ENSG00000237322	111712	18_Quiescent/low_signal	1	1	0	0	0	0	1	1	Prrx1|0|-0.778118415815996|17|+|12.61561865196|11.837500236144
rs4612756	11:93357914-93358411	11	93358154	A	G	0.631579	2.42347	0.999887	0.999887	18.3038	0.697409	4.8e-05	0.486412	27.4704	4.5168	1	1	0	0	0.993165	0.993165	1.88e-05	1.88e-05	ENSG00000166004	-36903	6_Weak_transcription	1	1	1	0	1	0	1	0	Hlxb9|0|2.094866815476|1|+|10.863191589594|12.95805840507
rs1885878	4:37009596-37010364	4	37009990	C	T	0.552632	1.23453	0.999894	0.999894	20.3535	0.646575	0.001419	0.468083	17.4271	4.44382	3	3	2.1414	0	0.996308	0.996686	6.44e-06	1.93e-05	ENSG00000174145	-236247	18_Quiescent/low_signal	1	0	0	0	1	0	0	0	NA
rs13178241	5:10085259-10085803	5	10085431	A	G	0.184211	4.28064	0.996177	0.996177	21.9398	0.704594	1.1e-05	0.53881	19.987	4.50551	7	7	0	0	0.995158	0.991785	2.81e-06	1.97e-05	ENSG00000196193	-116363	18_Quiescent/low_signal	0	0	0	0	1	1	1	0	NA
rs13064365	3:94004692-94004968	3	94004926	G	A	0.184211	0.294145	0.99965	0.99965	18.201	0.226855	8.8e-05	0.422759	9.36388	3.04328	1	1	0	0	0.992321	0.992321	1.99e-05	1.99e-05	ENSG00000242457	-208673	18_Quiescent/low_signal	1	1	0	1	0	0	0	0	Rad21_disc8|0|-11.528066032695|14|+|11.21190288797|-0.316163144724996
rs12644421	4:32717604-32718443	4	32718016	G	A	0.210526	0.0475	0.999526	0.999526	20.8336	0.719213	0.00648	0.493151	18.9411	3.82099	4	4	0	0	0.973782	0.993875	5.01e-06	2e-05	ENSG00000239983	-1252193	18_Quiescent/low_signal	0	0	0	0	0	0	0	0	STAT_known2|0|0.955904870543996|8|-|8.555974129456|9.511879
rs9311306	3:42226595-42227011	3	42226777	T	C	0.815789	4.28064	0.998952	0.998952	20.283	0.262228	3.9e-05	0.402149	21.8492	3.72575	4	3	0	0	0.996594	0.993843	6.68e-06	2e-05	ENSG00000242720	-18100	10_Active_enhancer_2	1	0	0	0	0	0	0	0	Bach1|0|-11.96622056942|5|+|12.19668851233|0.230467942909996
rs72794132	5:150618812-150619254	5	150618993	C	T	0.157895	0.667969	1	1	22.1348	0.220244	3.5e-05	0.395431	6.00985	3.04384	4	8	9.30772	0	0.99384	0.983638	2.54e-06	2.03e-05	ENSG00000196743	-13642	18_Quiescent/low_signal	0	0	0	1	0	0	0	0	Egr-1_disc1|0|-11.966145826752|8|+|6.73514817324801|-5.23099765350401
rs914187	21:42619567-42620226	21	42619749	T	C	0.631579	0.325822	1	1	21.2243	0.330694	2.7e-05	0.435183	9.84878	4.08191	6	5	0.389274	0	0.995126	0.994654	4.09e-06	2.04e-05	ENSG00000183844	-56632	10_Active_enhancer_2	1	0	0	0	0	0	0	0	Foxi1|0|-11.966099395428|4|+|11.939509036964|-0.0265903584640057
rs12419620	11:2232268-2233016	11	2232553	T	G	0.210526	1.35111	0.939126	0.939126	23.0454	0.362306	0.004995	0.515474	14.1404	4.60945	14	13	1.43678	0	0.982214	0.874773	1.58e-06	2.06e-05	ENSG00000180176	-39161	10_Active_enhancer_2	1	1	0	0	0	1	1	1	Foxa_known4|0|-11.159045062284|15|-|12.758795419252|1.599750356968
rs7807069	7:11300981-11301590	7	11301277	G	A	0.578947	0.120222	0.975714	0.975714	22.1143	0.662839	0.007974	0.489104	21.3248	4.00439	6	8	2.83345	0	0.944559	0.967838	2.57e-06	2.06e-05	ENSG00000226827	-2819	18_Quiescent/low_signal	0	0	0	0	0	0	0	0	Ik-2_3|0|11.480858177882|4|+|0.017601210215993|11.498459388098
rs872426	3:183203089-183203736	3	183203603	G	A	0.5	2.57895	1	1	20.6906	0.356257	2.2e-05	0.499569	24.1507	4.48456	4	4	8.24529	0	0.974716	0.9935	5.4e-06	2.16e-05	ENSG00000245318	-5710	10_Active_enhancer_2	1	1	1	0	1	1	1	1	NA
rs11051126	12:31027791-31028291	12	31028087	C	T	0.184211	0.968783	0.999825	0.999825	20.0822	0.702026	0.008018	0.546736	13.8891	3.68802	3	3	1.19916	0	0.981762	0.990302	7.42e-06	2.23e-05	ENSG00000110900	-52048	17_Weak_repressed_polycomb	0	0	0	0	0	0	0	0	Nr2f2|0|2.58285564872401|16|-|2.86015307264597|5.44300872136998
rs551633086	14:73602857-73603833	14	73603082	C	G	0.052632	0.058642	0.997366	0.997366	21.048	0.173244	0.001047	0.463095	17.9687	5.2497	5	5	11.2738	0	0.98078	0.975819	4.48e-06	2.24e-05	ENSG00000080815	-299	1_Active_TSS	0	0	0	0	1	1	0	0	NA
rs1481988	11:103462244-103462705	11	103462306	A	T	0.289474	0.206997	0.999872	0.999872	20.0007	0.727354	2.8e-05	0.55838	8.46135	3.86963	4	3	1.03622	0	0.963333	0.994539	7.74e-06	2.32e-05	ENSG00000242921	-181414	18_Quiescent/low_signal	0	0	0	0	0	0	0	0	Tgif1_1|0|11.966121158799|4|+|0.936480651379014|12.902601810178
rs2941898	5:90471991-90473088	5	90472637	A	G	0.736842	2.42347	0.955565	0.955565	20.5233	0.639969	0.002007	0.440339	21.245	4.12007	6	4	7.77083	0	0.96836	0.916079	5.89e-06	2.36e-05	ENSG00000199643	-94554	6_Weak_transcription	0	0	1	0	1	1	0	0	NA
rs11849228	14:93160277-93160820	14	93160522	A	G	0.473684	0.459753	0.979121	0.979121	19.8857	0.346114	0.002737	0.472205	18.282	5.03623	5	3	0.061521	0	0.986521	0.976607	8.22e-06	2.47e-05	ENSG00000100600	54735	10_Active_enhancer_2	1	1	0	0	0	1	1	0	AP-1_known1|0|-11.966090780865|3|-|11.551906400943|-0.414184379922006
rs2909828	5:116113731-116114119	5	116113838	C	T	0.789474	0.0475	0.998421	0.998421	17.7808	0.244476	0.00015	0.492152	14.319	4.00383	1	1	0	0	0.993373	0.993373	2.48e-05	2.48e-05	ENSG00000197575	61795	18_Quiescent/low_signal	0	0	0	0	0	0	0	0	NA
rs1874504	4:173468820-173469276	4	173469054	G	A	0.842105	0.667969	0.946785	0.946785	20.4163	0.683618	3e-05	0.580387	23.7302	3.49005	4	4	6.04696	0	0.961655	0.915833	6.23e-06	2.49e-05	ENSG00000222105	-593975	18_Quiescent/low_signal	1	0	0	0	0	0	1	0	HNF6|0|11.966151763326|6|-|0.205127018620004|12.171278781946
rs10932241	2:208976914-208977338	2	208976955	A	C	0.368421	0.172336	1	1	22.1591	0.700181	0.019676	0.438676	9.32086	3.01002	10	10	5.15345	0	0.970239	0.99162	2.51e-06	2.51e-05	ENSG00000229150	321	18_Quiescent/low_signal	0	0	0	0	1	0	0	0	ZBTB33_disc2|0|11.95658174061|5|+|-0.184081411205|11.772500329405
rs5756666	22:37797333-37797771	22	37797697	G	T	0.552632	0.033543	1	1	20.8303	0.257318	0.000152	0.25067	17.0826	3.19254	4	5	0	0	0.994087	0.993483	5.02e-06	2.51e-05	ENSG00000243902	26172	10_Active_enhancer_2	1	1	0	0	0	1	1	0	NA
rs4246723	4:130247735-130248735	4	130248180	T	G	0.605263	0.85067	1	1	21.1732	0.675911	1.6e-05	0.44974	26.3142	4.66605	9	6	0.008791	0	0.975713	0.994503	4.2e-06	2.52e-05	ENSG00000151466	-232971	6_Weak_transcription	1	0	0	0	1	0	1	0	EBF_known3|0|0.998470893685976|1|+|12.543046026758|13.541516920444
rs17137332	15:23061029-23061436	15	23061244	A	G	0.184211	0.968783	1	1	17.7371	0.25241	3.7e-05	0.361271	15.777	3.39361	3	1	0	0	0.921802	0.99046	2.54e-05	2.54e-05	ENSG00000170113	25814	10_Active_enhancer_2	0	0	0	1	0	0	0	0	CTCF_disc3|0|-11.966152832938|3|-|16.627274|4.66112116706201
rs12706147	7:116910569-116910867	7	116910650	G	A	0.263158	0.139592	1	1	20.3606	0.288391	5.7e-05	0.432455	6.16594	3.06147	4	4	4.31489	0	0.989758	0.992167	6.41e-06	2.57e-05	ENSG00000230785	-5627	6_Weak_transcription	0	0	0	0	0	0	0	0	NA
rs4511630	18:69105214-69105588	18	69105531	C	G	0.5	0.052632	0.999475	0.999475	20.3519	0.3479	2.6e-05	0.464522	21.5624	3.79585	5	4	1.11664	0	0.995354	0.994368	6.44e-06	2.58e-05	ENSG00000222879	925250	18_Quiescent/low_signal	0	1	0	0	0	0	1	0	NA
rs942380	6:121854381-121855060	6	121854778	A	G	0.605263	0.001437	1	1	19.0072	0.749076	3.1e-05	0.633333	8.99939	3.8888	2	2	0	0	0.974889	0.992929	1.3e-05	2.6e-05	ENSG00000201379	9391	18_Quiescent/low_signal	0	0	0	0	0	0	0	1	AP-1_known1|0|11.966172379902|4|+|-0.261838977843013|11.704333402059
rs421654	5:96142909-96144341	5	96143437	T	C	0.105263	0.262976	1	1	21.3912	0.32422	0.002065	0.430127	23.4651	6.42711	9	7	11.8193	0	0.968169	0.969234	3.74e-06	2.62e-05	ENSG00000164307	983	1_Active_TSS	0	0	0	1	1	1	0	1	NF-E2_disc3|0|-0.804564518152006|5|-|10.496499820056|9.691935301904
rs1397707	2:160760581-160761768	2	160760972	C	T	0.368421	0.325822	0.977744	0.977744	20.7408	0.616604	0.002186	0.564343	33.129	5.505	4	5	10.7902	0	0.987823	0.968866	5.26e-06	2.63e-05	ENSG00000054219	679	1_Active_TSS	1	0	0	0	1	1	0	0	UF1H3BETA|0|9.31224608832002|14|-|-11.169645447304|-1.857399358984
rs655045	3:193549277-193549742	3	193549449	C	T	0.578947	2.35783	0.999245	0.999245	18.9426	0.320423	0.001265	0.441662	11.7361	5.08894	3	2	0	0	0.997136	0.996645	1.35e-05	2.69e-05	ENSG00000237255	-9341	9_Active_enhancer_1	1	0	0	0	1	1	1	1	NF-E2_disc4|0|-10.990199741752|4|-|11.320206408808|0.330006667056011
rs11670789	19:47808672-47808913	19	47808762	A	G	0.289474	0.43618	1	1	20.6861	0.226874	0.001674	0.472538	5.93779	2.86031	6	5	0.496057	0	0.9603	0.937142	5.41e-06	2.71e-05	ENSG00000197405	-4433	6_Weak_transcription	0	0	0	1	0	0	0	0	NA
rs4145628	9:107341022-107341391	9	107341366	A	G	0.263158	0.139592	1	1	20.9336	0.262613	4.2e-05	0.402632	4.40352	3.39124	6	6	1.18898	0	0.980915	0.973613	4.75e-06	2.85e-05	ENSG00000186943	9572	18_Quiescent/low_signal	1	1	0	0	0	0	1	0	Mxi1_disc2|0|-11.95262500146|8|-|13.69846928144|1.74584427997999
rs12368929	12:32204390-32205429	12	32204698	G	A	0.263158	0.139592	1	1	22.0776	0.379918	0.002189	0.458581	16.9212	5.25911	11	11	3.67506	0	0.987958	0.994261	2.62e-06	2.88e-05	ENSG00000151746	-55793	18_Quiescent/low_signal	1	1	1	0	1	0	1	0	AP-1_disc3|0|-11.96616527103|7|-|10.354994099827|-1.611171171203
rs72344434	8:31705857-31706238	8	31706046	GTC	G	0.368421	0.172336	0.999887	0.999887	17.4791	0.273689	0.01	0.5	22.2893	3.41967	0	1	0	0	1	0.994141	2.9e-05	2.9e-05	ENSG00000157168	208355	18_Quiescent/low_signal	1	1	1	0	0	1	1	1	Irf_disc5|0|-2.17718069649199|4|+|-20.227362026808|-22.4045427233
rs11256939	10:11009023-11009406	10	11009166	T	G	0.289474	0.206997	1	1	19.5602	0.26638	3.3e-05	0.454963	8.53296	3.48367	4	3	0	0	0.99418	0.99526	9.75e-06	2.92e-05	ENSG00000231496	6908	18_Quiescent/low_signal	1	1	1	0	0	0	0	0	LBP-1_2|0|-11.96614030185|5|+|11.612467217575|-0.353673084275002
rs1334094	9:119783959-119784479	9	119784228	C	T	0.184211	0.968783	0.999825	0.999825	19.5544	0.272663	1.3e-05	0.553301	8.89233	4.06634	6	3	4.72356	0	0.988163	0.990704	9.78e-06	2.93e-05	ENSG00000247253	102015	17_Weak_repressed_polycomb	1	1	0	1	0	0	1	0	Maf_disc2|0|-1.83077745447999|11|+|11.089416182832|9.25863872835201
rs8000435	13:100310212-100311163	13	100310215	G	C	0.184211	0.968783	0.996898	0.996898	20.0934	0.680922	3.8e-05	0.5659	22.5704	4.39242	5	4	0.939439	0	0.93132	0.986827	7.38e-06	2.95e-05	ENSG00000227659	33013	10_Active_enhancer_2	0	0	0	1	0	0	0	0	NA
rs10516709	4:85066339-85066726	4	85066641	A	G	0.342105	0.051986	0.99965	0.99965	19.5303	0.7064	7.2e-05	0.569532	13.6615	3.45889	3	3	0	0	0.992611	0.994966	9.9e-06	2.97e-05	ENSG00000200108	-88472	18_Quiescent/low_signal	1	0	0	0	0	0	0	1	GR_known8|0|2.58289653374999|2|+|5.70071351487502|8.28361004862501
rs68093214	3:70657549-70658203	3	70657785	T	C	0.263158	0.655306	0.989347	0.989347	20.0728	0.336893	2.2e-05	0.47984	17.2518	3.74418	4	4	0.016181	0	0.993831	0.986979	7.45e-06	2.98e-05	ENSG00000240156	-142726	18_Quiescent/low_signal	1	1	0	0	0	0	1	1	Cphx|0|-7.170744810312|4|-|12.525905906508|5.355161096196
rs6534785	4:131257393-131258355	4	131257538	T	C	0.631579	0.172336	1	1	21.3738	0.737552	0.001892	0.507946	12.8884	4.07515	8	8	8.276	0	0.993832	0.991505	3.78e-06	3.02e-05	ENSG00000199896	170537	18_Quiescent/low_signal	0	0	0	1	0	0	0	0	Zec|0|11.644284660828|5|-|-5.233238086394|6.41104657443401
rs1763603	1:16339271-16340004	1	16339809	T	C	0.842105	0.824653	0.948425	0.948425	21.3081	0.656534	2.2e-05	0.559205	15.8286	4.3157	7	8	19.149	0	0.972381	0.882322	3.91e-06	3.13e-05	ENSG00000186510	-6060	9_Active_enhancer_1	0	0	0	0	1	1	0	0	RXRA_disc2|0|9.27999863897199|17|-|0.313466001719988|9.59346464069198
rs28579651	4:42596860-42597280	4	42597038	C	A	0.657895	0.051986	1	1	19.43	0.62196	0.00238	0.461567	19.5737	3.9193	3	3	6.01422	0	0.995155	0.995274	1.04e-05	3.13e-05	ENSG00000124406	62262	6_Weak_transcription	1	0	0	0	0	0	1	0	Hoxa5_2|0|2.297654452929|5|+|8.573087004596|10.870741457525
rs11100782	4:144152560-144153217	4	144152897	A	T	0.605263	0.85067	0.99956	0.99956	17.3053	0.343384	4.7e-05	0.454843	34.6634	4.47911	2	1	0.024063	0	0.99562	0.99454	3.18e-05	3.18e-05	ENSG00000170185	46489	6_Weak_transcription	1	0	0	0	0	0	0	0	Foxa_known4|0|-11.966172686412|8|-|11.862695940376|-0.103476746036009
rs13354827	5:10649492-10650820	5	10650324	T	G	0.236842	1.40601	0.999709	0.999709	20.6743	0.27214	0.011637	0.390835	10.2222	4.90627	6	6	0.673284	0	0.971626	0.99326	5.44e-06	3.27e-05	ENSG00000233100	-5096	6_Weak_transcription	0	0	0	0	1	0	0	0	ELF1_disc1|0|-11.966129046248|3|+|11.306570208171|-0.659558838077004
rs35983484	17:45400925-45402013	17	45401711	T	G	0.631579	0.172336	0.999435	0.999435	19.3479	0.643551	0.000955	0.509167	30.6314	5.52406	4	3	1.11914	0	0.991947	0.995039	1.09e-05	3.27e-05	ENSG00000178852	-423	1_Active_TSS	0	0	0	0	1	1	0	0	HNF4_known4|0|11.966184642395|14|+|-0.818293767129006|11.147890875266
rs10790872	11:99520986-99521348	11	99521114	T	G	0.263158	0.655306	0.998516	0.998516	19.3031	0.70003	8.3e-05	0.486541	8.65246	3.27104	3	3	0.282036	0	0.994214	0.990674	1.12e-05	3.35e-05	ENSG00000149972	-169278	6_Weak_transcription	0	0	0	0	0	0	0	0	NA
rs10081283	7:123174204-123175501	7	123174364	A	G	0.315789	0.902531	1	1	21.1164	0.425248	0.005602	0.519924	23.1409	7.30717	8	8	15.3009	0	0.994341	0.994091	4.32e-06	3.46e-05	ENSG00000164675	927	1_Active_TSS	1	0	0	0	1	1	0	0	NA
rs10811661	9:22133728-22134241	9	22134094	T	C	0.184211	0.294145	0.993408	0.993408	19.7714	0.291041	2.2e-05	0.467066	21.9734	3.42559	5	4	0.004989	0	0.985612	0.984747	8.73e-06	3.49e-05	ENSG00000236921	80943	6_Weak_transcription	1	0	0	0	1	0	1	1	NA
rs1237999	11:85814963-85815260	11	85815030	G	A	0.578947	0.353306	0.998606	0.998606	17.1098	0.213646	0.000223	0.31032	4.92553	3.66656	1	1	0	0	0.906213	0.906213	3.53e-05	3.53e-05	ENSG00000238666	9728	18_Quiescent/low_signal	0	0	0	0	0	0	1	0	Bach1|0|-11.96610935299|10|-|10.01662405147|-1.94948530152
rs11998563	8:281046-281275	8	281219	T	C	0.289474	2.46609	0.963728	0.963728	20.7792	0.720835	0.000837	0.68517	13.7595	3.01705	7	7	0.079274	0	0.904592	0.948688	5.15e-06	3.61e-05	ENSG00000182366	52128	18_Quiescent/low_signal	0	0	0	0	0	0	0	0	TLX1::NFIC|0|11.966079960522|12|+|-7.54479088015199|4.42128908037
rs2293083	2:676034-677743	2	676177	C	G	0.631579	0.325822	0.992978	0.992978	20.7683	0.427069	0.002319	0.459502	35.1152	7.16929	10	7	9.45247	0	0.986633	0.986898	5.18e-06	3.63e-05	ENSG00000151353	1405	10_Active_enhancer_2	1	1	1	1	1	1	0	1	NA
rs831684	12:104020273-104020797	12	104020461	T	C	0.5	0.052632	1	1	18.3654	0.782476	0.000109	0.729553	4.16713	4.69588	1	2	0	0	0.995486	0.995486	1.82e-05	3.65e-05	ENSG00000212594	34382	18_Quiescent/low_signal	1	0	1	1	1	1	1	0	CTCF_disc1|0|5.607914573448|20|-|5.89725140121899|11.505165974667
rs6430529	2:135432961-135433185	2	135433023	G	T	0.605263	0.001437	1	1	16.9886	0.316684	0.000124	0.379597	22.2633	3.72226	1	1	0	0	0.995281	0.995281	3.76e-05	3.76e-05	ENSG00000152128	43609	10_Active_enhancer_2	1	0	0	0	0	0	0	0	BCL_disc2|0|-4.80573529659|7|-|12.86390702579|8.0581717292
rs12531481	7:86187964-86188730	7	86188408	T	A	0.210526	1.35111	0.999369	0.999369	20.0362	0.658551	0.003887	0.407112	21.0559	4.46618	4	5	12.2524	0	0.993515	0.990098	7.6e-06	3.8e-05	ENSG00000239749	-85261	18_Quiescent/low_signal	1	0	0	0	0	0	0	0	Pou5f1_disc1|0|5.12943731321401|12|+|7.876601812736|13.00603912595
rs13086580	3:32667125-32667564	3	32667166	T	C	0.342105	3.27834	0.930247	0.930247	21.3495	0.734211	0.007708	0.52163	13.0196	2.92944	8	10	1.06934	0	0.94049	0.909639	3.83e-06	3.83e-05	ENSG00000231552	-3731	18_Quiescent/low_signal	0	0	0	0	0	0	0	0	HEY1_disc2|0|3.33344178669601|16|+|8.413872249561|11.747314036257
rs13241405	7:9984906-9986001	7	9985552	G	A	0.263158	0.139592	0.999323	0.999323	19.0422	0.36045	0.001207	0.430013	15.6163	5.98652	8	3	4.37691	0	0.94405	0.993928	1.28e-05	3.84e-05	ENSG00000235431	-15746	10_Active_enhancer_2	1	1	0	0	0	0	1	0	GR_known3|0|-11.255068028604|1|+|7.911197858272|-3.343870170332
rs34035218	4:37563427-37563795	4	37563793	T	C	0.473684	0.058642	0.998631	0.998631	20.0143	0.263839	3.7e-05	0.351116	8.76155	4.12611	5	5	0	0	0.984302	0.980399	7.69e-06	3.84e-05	ENSG00000245325	-48831	6_Weak_transcription	1	1	0	0	0	0	0	0	NA
rs28520918	6:31275644-31276540	6	31275846	C	A	0.078947	0.139592	1	1	23.0119	0.195797	9e-06	0.482724	3.50977	4.20131	22	24	2.3294	0	0.934324	0.981827	1.61e-06	3.86e-05	ENSG00000229836	682	2_Weak_TSS	0	0	0	0	1	0	0	0	Sin3Ak-20_disc5|0|-11.373251070312|8|+|10.38769082055|-0.985560249762003
rs6829713	4:17289298-17290259	4	17289857	G	T	0.631579	5.69785	0.983732	0.983732	19.0042	0.33466	5.4e-05	0.497129	24.4811	4.44785	2	3	0	0	0.989766	0.983316	1.3e-05	3.91e-05	ENSG00000206780	33207	18_Quiescent/low_signal	1	1	0	0	1	1	1	1	AP-2_known4|0|-9.05163726811499|6|-|12.04759503817|2.99595777005501
rs4246839	9:18759787-18760265	9	18760031	T	G	0.921053	0.139592	1	1	19.0025	0.778071	0.001587	0.544039	11.8337	3.96843	3	3	7.38269	0	0.996822	0.983549	1.31e-05	3.92e-05	ENSG00000236857	-41262	10_Active_enhancer_2	1	0	0	0	0	1	1	0	MIF-1|0|11.644225910643|6|+|-5.18799488274698|6.456231027896
rs4798573	18:7584698-7585218	18	7585129	C	G	0.315789	10.871	1	1	18.9908	0.294885	0.003533	0.398505	9.45856	3.8924	3	3	0.325151	0	0.993747	0.997035	1.31e-05	3.94e-05	ENSG00000173482	16880	6_Weak_transcription	0	0	0	0	1	1	1	1	Mxi1_disc1|0|-5.39233043458501|7|+|11.81972830333|6.42739786874499
rs116133608	4:94280383-94281010	4	94280945	G	A	0.078947	0.139592	0.977697	0.977697	16.8527	0.733933	6e-05	0.538304	39.2221	4.4905	1	1	0	0	0.962658	0.962658	4.04e-05	4.04e-05	ENSG00000240367	-460959	18_Quiescent/low_signal	1	0	0	0	0	0	0	0	TCF12_disc2|0|11.54202971701|6|+|0.982034272180002|12.52406398919
rs9661500	1:1590225-1590984	1	1590681	G	A	0.815789	0.968783	0.848826	0.848826	19.8962	0.361082	0.004018	0.484788	12.1194	5.38513	7	5	-3.5037	0	0.884836	0.766993	8.18e-06	4.09e-05	ENSG00000189409	22750	1_Active_TSS	0	0	0	1	1	1	0	0	SP1_known3|0|-11.381359557568|8|+|12.051393038208|0.670033480639972
rs3903759	6:131520753-131521259	6	131520994	C	A	0.105263	0.262976	1	1	16.764	0.21005	0.006148	0.325386	14.8803	3.791	1	1	0.533276	0	0.987042	0.987042	4.23e-05	4.23e-05	ENSG00000218857	-14127	6_Weak_transcription	0	1	0	1	1	0	0	0	PPAR_2|0|-11.966195973498|4|-|6.257969987086|-5.70822598641199
rs842274	3:16327789-16328120	3	16327855	T	G	0.368421	0.172336	1	1	18.0654	0.265592	0.008251	0.415931	7.22814	3.65891	2	2	3.53054	0	0.993259	0.993499	2.13e-05	4.27e-05	ENSG00000154814	21082	5_Strong_transcription	1	0	0	0	0	1	0	1	NA
rs6908118	6:65011300-65012115	6	65011364	G	A	0.710526	0.43618	1	1	19.7832	0.223181	0.004622	0.381822	7.24678	4.08754	7	5	0.700088	0	0.99294	0.989986	8.67e-06	4.34e-05	ENSG00000232120	-76389	18_Quiescent/low_signal	1	0	0	0	0	0	0	0	TAL1_known1|0|-11.96620280205|9|+|13.0270206342|1.06081783215001
rs16977110	17:70147558-70148229	17	70147870	T	C	0.105263	0.262976	0.997213	0.997213	18.0214	0.294858	2.4e-05	0.48053	26.6989	4.45966	3	2	0.751454	0	0.77014	0.985572	2.18e-05	4.37e-05	ENSG00000231994	-9637	10_Active_enhancer_2	1	0	1	0	1	1	1	1	NA
rs7079726	10:1082202-1082691	10	1082289	T	C	0.421053	0.353306	0.999569	0.999569	19.2507	0.345277	4.3e-05	0.454791	23.0357	3.74187	4	4	3.15901	0	0.993282	0.989753	1.15e-05	4.59e-05	ENSG00000245159	-3817	6_Weak_transcription	0	0	0	0	0	0	0	0	TATA_disc2|0|-11.966179773764|9|-|13.186357431018|1.220177657254
rs72674307	14:42684083-42684674	14	42684626	A	G	0.526316	0.058642	0.93133	0.93133	16.604	0.335749	0.000306	0.400785	24.9362	4.2697	1	1	0	0	0.891987	0.891987	4.61e-05	4.61e-05	ENSG00000222084	-85872	18_Quiescent/low_signal	0	0	0	0	0	0	0	0	Mef2_known3|0|-11.58781442358|8|-|14.80683106552|3.21901664194
rs139927190	3:8865687-8866161	3	8865906	CTGCTTCATCACCTATTAGTGATGCTTCACTAATAGG	C	0.631579	0.172336	0.966586	0.966586	18.6627	0.248089	2.8e-05	0.524528	8.35472	4.28389	3	3	0	0	0.989779	0.928591	1.56e-05	4.68e-05	ENSG00000246544	-53191	6_Weak_transcription	1	1	0	0	0	0	1	1	HNF1_3|0|-39.490568221284|19|+|7.76974506905601|-31.720823152228
rs34545630	8:61198625-61198978	8	61198945	TA	T	0.526316	0.058642	0.993299	0.993299	19.1704	0.668971	3.3e-05	0.624248	19.3534	3.86264	3	4	0	0	0.989073	0.985613	1.2e-05	4.78e-05	ENSG00000178538	-4671	6_Weak_transcription	1	1	0	0	0	0	1	0	Evi-1_4|0|4.16649924822198|3|+|7.37374976379601|11.540249012018
rs202137670	17:18965262-18965925	17	18965360	G	C	0.342105	0.626168	0.755104	0.755104	19.1644	0.69238	0.007285	0.25341	4.74389	4.05911	9	4	0	0	0.744301	0.726494	1.2e-05	4.8e-05	ENSG00000200229	36	18_Quiescent/low_signal	1	0	0	0	0	1	1	1	NA
rs537433434	2:227165273-227165806	2	227165427	T	G	0.342105	0.051986	0.999416	0.999416	17.8228	0.263728	0.007085	0.458691	9.71936	3.31093	3	2	0.015003	0	0.804022	0.990638	2.42e-05	4.85e-05	ENSG00000235070	-115186	6_Weak_transcription	0	0	0	0	0	0	0	1	NA
rs10488675	11:5297937-5298319	11	5298030	A	G	0.236842	1.82996	0.998407	0.998407	18.5815	0.225343	9.5e-05	0.259562	17.3848	3.79332	2	3	0	0	0.919821	0.988464	1.63e-05	4.88e-05	ENSG00000229093	15673	17_Weak_repressed_polycomb	1	1	0	0	0	0	1	0	Pou3f2_2|0|-11.96618977197|4|+|6.42527263049001|-5.54091714148001
rs9526943	13:53144139-53144645	13	53144238	G	C	0.473684	0.459753	0.952078	0.952078	16.4837	0.332749	2.7e-05	0.575631	22.8031	4.04802	1	1	0	0	0.861132	0.861132	4.91e-05	4.91e-05	ENSG00000139675	-47467	18_Quiescent/low_signal	1	0	0	1	1	0	0	1	YY1_known2|0|-2.499054271308|2|-|11.305318357008|8.80626408569999
rs10144567	14:64219314-64219999	14	64219601	T	C	0.184211	0.294145	0.915573	0.915573	19.5323	0.266236	0.00319	0.499565	21.9117	4.07511	4	5	3.08415	0	0.865446	0.841833	9.89e-06	4.95e-05	ENSG00000126821	-24580	18_Quiescent/low_signal	1	1	1	0	1	0	1	0	GATA_known3|0|-11.871533738844|5|+|10.673941158792|-1.197592580052
rs11720948	3:63029254-63029617	3	63029516	A	G	0.289474	0.43618	0.998595	0.998595	16.4327	0.295859	9.5e-05	0.359659	27.0434	3.68938	1	1	0	0	0.992991	0.992991	5.04e-05	5.04e-05	ENSG00000242841	54133	18_Quiescent/low_signal	1	0	0	0	0	0	0	1	NF-I_2|0|-1.73492169926401|16|+|12.496833380908|10.761911681644
rs4239788	21:29226734-29227038	21	29226905	T	C	0.315789	0.902531	0.957008	0.957008	17.7475	0.764634	0.000286	0.532135	7.46781	3.10742	2	2	0	0	0.868363	0.920278	2.52e-05	5.04e-05	ENSG00000234083	-100507	18_Quiescent/low_signal	0	1	0	0	0	0	0	0	TCF12_disc2|0|11.966130726342|4|-|0.200561433306007|12.166692159648
rs897392	12:123325865-123326942	12	123326326	G	A	0.868421	0.43618	0.95347	0.95347	19.821	0.382813	0.005423	0.493733	36.6067	5.32116	7	6	16.8531	0	0.983278	0.93877	8.5e-06	5.1e-05	ENSG00000130787	6367	10_Active_enhancer_2	1	0	0	0	1	1	0	1	ATF4|0|-11.4808570821|7|+|12.118835041956|0.637977959856002
rs592333	13:51340059-51340707	13	51340315	A	G	0.342105	0.626168	0.967207	0.967207	18.4786	0.678381	2.3e-05	0.55556	10.4596	4.42707	4	3	0.618209	0	0.77894	0.78263	1.72e-05	5.15e-05	ENSG00000237152	-41934	18_Quiescent/low_signal	1	1	0	0	1	1	1	1	p300_disc1|0|11.966113842984|7|-|0.533459797760003|12.499573640744
rs77317845	14:80901083-80901829	14	80901370	A	C	0.342105	0.626168	0.999533	0.999533	18.4667	0.193293	2.2e-05	0.311814	6.33826	5.1624	4	3	0.132745	0	0.834509	0.77333	1.73e-05	5.19e-05	ENSG00000211448	-223268	10_Active_enhancer_2	1	1	1	0	1	1	0	1	AP-2_disc2|0|-8.46348337899001|11|+|12.521573052276|4.05808967328599
rs7810100	7:43215105-43215800	7	43215614	C	T	0.184211	0.968783	0.990146	0.990146	17.6861	0.696906	2.6e-05	0.656034	26.4875	4.37472	3	2	0	0	0.985041	0.979931	2.61e-05	5.21e-05	ENSG00000223258	32360	2_Weak_TSS	0	1	0	0	1	0	1	1	Bach1|0|11.96610935299|7|-|-0.398460968739997|11.56764838425
rs554164694	8:89248761-89249272	8	89249102	C	A	0.342105	0.051986	0.999533	0.999533	18.9891	0.187409	0.006796	0.319701	4.96504	4.13887	3	4	3.12832	0	0.994181	0.984396	1.31e-05	5.26e-05	ENSG00000156103	90956	6_Weak_transcription	1	0	0	0	0	1	0	0	NA
rs35682	3:10328654-10328899	3	10328782	G	A	0.552632	0.033543	1	1	17.6236	0.230456	0.000127	0.330661	6.01859	3.00882	2	2	0	0	0.977849	0.993096	2.69e-05	5.38e-05	ENSG00000240288	1181	6_Weak_transcription	0	0	0	1	0	0	0	0	Roaz_1|0|-11.96617970008|11|+|0.280088604209993|-11.68609109587
rs7311377	12:64403465-64404328	12	64403934	G	T	0.368421	2.42347	1	1	17.6214	0.303534	6.8e-05	0.343612	27.9148	4.75823	2	2	0	0	0.992098	0.993328	2.7e-05	5.39e-05	ENSG00000242087	-137641	10_Active_enhancer_2	0	0	0	0	1	0	0	0	Foxc1_1|0|-11.966106118866|11|-|11.081495927604|-0.884610191261999
rs139342574	18:71958234-71959704	18	71958636	C	A	0.184211	0.294145	0.915036	0.915036	20.2475	0.38742	0.006213	0.369192	12.9046	7.14712	18	8	13.261	0	0.828371	0.817122	6.8e-06	5.44e-05	ENSG00000166347	1017	1_Active_TSS	0	1	0	1	1	1	1	0	GZF1|0|-11.96613593334|4|-|-1.27411763265999|-13.240253566
rs1984857	8:6389248-6390262	8	6389714	T	C	0.368421	0.325822	0.999887	0.999887	20.8169	0.315049	2.7e-05	0.658826	5.45886	4.33524	9	11	13.3665	0	0.98992	0.985265	5.05e-06	5.56e-05	ENSG00000091879	31682	6_Weak_transcription	0	0	0	0	1	1	0	0	Nkx6-1_1|0|-11.966124137754|8|+|10.71211488244|-1.254009255314
rs12196247	6:139349519-139350967	6	139350182	G	A	0.394737	0.001437	0.987526	0.987526	19.6425	0.580624	0.000691	0.480595	28.3557	5.9284	8	6	5.95508	0	0.912231	0.796153	9.34e-06	5.6e-05	ENSG00000146386	-301	1_Active_TSS	0	0	0	0	1	1	0	0	NA
rs61792271	3:153679225-153679613	3	153679499	C	T	0.078947	0.139592	1	1	17.5306	0.249825	3.2e-05	0.570929	14.2561	3.44689	2	2	4.74346	0	0.994106	0.982672	2.83e-05	5.65e-05	ENSG00000240456	18750	18_Quiescent/low_signal	1	1	0	0	0	0	0	0	Foxj1_1|0|-3.013395573991|5|-|8.54438395542101|5.53098838143001
rs13034928	2:209952337-209953074	2	209952755	A	G	0.710526	0.43618	1	1	19.6191	0.214636	0.000133	0.372391	11.8517	4.04566	2	6	0	0	0.988962	0.989525	9.45e-06	5.67e-05	ENSG00000235864	-13465	18_Quiescent/low_signal	1	0	0	0	0	0	0	0	NA
rs545316657	13:21900117-21900866	13	21900680	A	ATTTTT	0.394737	0.996253	0.924899	0.924899	19.2574	0.389462	0.001775	0.508633	32.1473	4.83066	3	5	1.30042	0	0.982642	0.893402	1.14e-05	5.71e-05	ENSG00000215571	6821	2_Weak_TSS	0	0	0	0	1	1	0	0	NA
rs11332772	3:186647978-186650034	3	186649931	CG	C	0.631579	0.325822	0.833762	0.833762	21.1645	0.672342	0.000819	0.516936	15.446	5.15476	13	14	2.83039	0	0.952751	0.65438	4.22e-06	5.9e-05	ENSG00000073849	-297	2_Weak_TSS	0	0	0	1	1	0	0	0	CTCF_disc9|0|1.869417173492|6|+|9.945568081326|11.814985254818
rs57171458	7:4082039-4083143	7	4082591	G	C	0.105263	0.262976	1	1	21.2799	0.245853	0.000981	0.575776	16.8264	4.02911	12	15	1.4917	0	0.985015	0.967815	3.97e-06	5.95e-05	ENSG00000236510	-398623	10_Active_enhancer_2	1	1	1	0	1	1	1	1	NA
rs12148310	15:26874055-26874699	15	26874395	T	C	0.631579	0.172336	0.993608	0.993608	17.408	0.687465	0.002361	0.500601	6.9193	4.3425	3	2	0.522163	0	0.968797	0.990833	3.02e-05	6.03e-05	ENSG00000235518	29786	1_Active_TSS	0	0	0	0	0	1	0	1	p300_disc9|0|5.31363584958001|17|-|5.89748852187999|11.21112437146
rs37390	5:142974570-142976266	5	142976018	A	T	0.368421	0.172336	0.999322	0.999322	20.2587	0.414744	0.000874	0.557622	50.7901	5.31809	11	9	3.14092	0	0.924787	0.995747	6.76e-06	6.09e-05	ENSG00000225869	157744	6_Weak_transcription	1	1	1	0	1	1	1	1	Gm397|0|-2.646253246608|12|+|10.634574178092|7.988320931484
rs2673145	2:227183150-227183313	2	227183246	G	A	0.552632	0.554724	0.999894	0.999894	16.0604	0.272786	6.5e-05	0.424153	11.3273	2.43358	3	1	0.248077	0	0.979351	0.993184	6.14e-05	6.14e-05	ENSG00000235070	-133063	18_Quiescent/low_signal	0	0	0	0	0	0	0	0	Msx2|0|-0.353085999467993|2|+|11.642098228342|11.289012228874
rs10504389	8:66556129-66556294	8	66556187	C	T	0.105263	0.262976	1	1	18.1407	0.688073	1.5e-05	0.605235	20.3835	4.55904	3	3	0	0	0.995309	0.988074	2.05e-05	6.16e-05	ENSG00000066855	-846	2_Weak_TSS	0	0	0	0	1	0	0	0	BCL_disc1|0|11.92399150614|7|-|-0.488726071843999|11.435265434296
rs6866646	5:174035615-174036024	5	174035712	G	A	0.131579	0.43618	0.991545	0.991545	18.1158	0.675586	2.7e-05	0.50689	17.7683	4.11301	4	3	3.24005	0	0.983307	0.966702	2.08e-05	6.24e-05	ENSG00000213376	95300	10_Active_enhancer_2	0	0	1	0	1	0	1	1	Hoxc9|0|7.196214153751|12|+|4.45841189794901|11.6546260517
rs7087112	10:5051275-5051730	10	5051674	G	T	0.657895	0.051986	0.972509	0.972509	18.1156	0.364098	0.002775	0.539079	25.9749	4.04955	5	3	3.04444	0	0.976206	0.925614	2.08e-05	6.24e-05	ENSG00000239148	4372	6_Weak_transcription	1	0	0	0	0	0	0	1	DMRT3|0|-11.966173081787|10|-|10.270244049561|-1.695929032226
rs10787328	10:113063642-113064012	10	113064008	T	C	0.710526	0.43618	1	1	17.2678	0.678973	8.1e-05	0.404398	23.4973	3.35377	2	2	2.91839	0	0.994759	0.990997	3.25e-05	6.49e-05	ENSG00000237618	-18895	18_Quiescent/low_signal	0	1	0	0	0	1	1	0	Foxf1|0|1.58301051812799|1|+|12.844829295312|14.42783981344
rs3053137	9:100273178-100274536	9	100273390	A	G	0.605263	3.54395	1	1	19.9027	0.692004	0.013904	0.402134	10.522	5.79514	7	8	6.2777	0	0.988476	0.978695	8.15e-06	6.52e-05	ENSG00000228174	5442	10_Active_enhancer_2	1	1	0	0	0	1	1	1	NA
rs12564596	1:169132408-169132603	1	169132554	C	T	0.473684	0.058642	0.998526	0.998526	17.2526	0.715584	6.6e-05	0.453497	15.4316	3.23236	2	2	0	0	0.994638	0.99445	3.27e-05	6.55e-05	ENSG00000143153	57472	18_Quiescent/low_signal	0	0	0	0	0	0	1	0	RXRA_disc3|0|1.615274519232|10|+|10.764849889909|12.380124409141
rs6828872	4:30764810-30765419	4	30765027	C	G	0.473684	0.459753	1	1	15.9241	0.681463	0.029118	0.632855	13.3885	3.93036	1	1	0	0	0.995412	0.995412	6.59e-05	6.59e-05	ENSG00000169851	42772	18_Quiescent/low_signal	1	0	0	0	0	0	0	0	ATF2|0|11.966095427116|4|-|-0.126446689139996|11.839648737976
rs10249922	7:126019530-126019958	7	126019724	C	T	0.184211	0.968783	0.999126	0.999126	18.0061	0.306612	3.8e-05	0.470643	13.2793	3.49318	3	3	3.79698	0	0.990158	0.988191	2.2e-05	6.61e-05	ENSG00000241921	505	18_Quiescent/low_signal	1	0	0	0	0	0	0	0	NA
rs7616440	3:69268460-69268992	3	69268737	G	C	0.868421	0.43618	0.957017	0.957017	18.9634	0.3164	5.9e-05	0.63201	12.7037	3.71222	4	5	11.2746	0	0.986553	0.916388	1.33e-05	6.66e-05	ENSG00000243036	-11724	10_Active_enhancer_2	0	1	1	0	0	0	0	0	NA
rs2786624	13:34933293-34933790	13	34933534	T	G	0.657895	0.051986	1	1	15.9013	0.313199	1.9e-05	0.456587	14.4433	4.57973	3	1	0	0	0.997223	0.994423	6.67e-05	6.67e-05	ENSG00000231910	215510	10_Active_enhancer_2	1	0	0	0	0	0	0	1	AP-1_disc3|0|-11.96616527103|4|-|10.322149358913|-1.644015912117
rs7943372	11:93012711-93013611	11	93013387	T	G	0.789474	0.0475	1	1	19.3084	0.642814	0.002886	0.501629	27.0657	6.06293	5	6	4.12807	0	0.992242	0.994285	1.11e-05	6.67e-05	ENSG00000165325	-51173	10_Active_enhancer_2	1	1	0	0	0	1	1	1	NA
rs1014607	10:29023994-29024290	10	29024130	G	A	0.289474	0.206997	1	1	17.2147	0.731104	3e-05	0.664578	12.112	3.51797	3	2	-3.1e-05	0	0.988981	0.991463	3.34e-05	6.68e-05	ENSG00000236716	-8681	17_Weak_repressed_polycomb	0	0	0	0	0	0	0	1	Nrf-2_2|0|11.966189643089|3|-|-0.252580982045004|11.713608661044
rs4243446	6:134444657-134445316	6	134445276	C	T	0.421053	0.353306	1	1	15.8869	0.648902	2e-05	0.530283	23.0081	4.07832	4	1	4.66689	0	0.992381	0.995601	6.72e-05	6.72e-05	ENSG00000216753	-8029	18_Quiescent/low_signal	1	1	0	1	1	0	1	0	Hoxb6|0|5.455018215184|9|+|6.173865881792|11.628884096976
rs4704864	5:156890669-156891287	5	156890897	C	G	0.368421	11.3768	0.9972	0.9972	15.8866	0.327617	5.8e-05	0.425378	11.3967	4.43918	1	1	0	0	0.996082	0.996082	6.73e-05	6.73e-05	ENSG00000172548	3641	10_Active_enhancer_2	1	1	0	0	0	0	1	0	NF-E2_known1|0|-11.79625237531|3|-|11.220331463334|-0.575920911975999
rs4764832	12:102285227-102285722	12	102285683	G	T	0.473684	0.058642	0.999894	0.999894	19.2552	0.66215	0.001636	0.52531	23.4287	4.805	7	6	0	0	0.993879	0.985506	1.14e-05	6.86e-05	ENSG00000244145	-6003	10_Active_enhancer_2	1	1	0	0	1	1	0	1	AP-1_disc4|0|11.966092434212|5|-|-2.17924625236999|9.78684618184201
rs165912	22:21131847-21132467	22	21132154	C	T	0.578947	0.353306	1	1	15.832	0.639069	2.4e-05	0.57769	24.2706	5.15947	2	1	0	0	0.996155	0.996392	6.92e-05	6.92e-05	ENSG00000099937	3679	10_Active_enhancer_2	1	1	0	1	0	1	1	1	Bach1|0|11.96610935299|11|-|-3.69891974542|8.26718960757
rs9643305	8:134609768-134610151	8	134610055	A	G	0.315789	0.012492	0.998542	0.998542	17.8894	0.314075	6.8e-05	0.538764	17.8267	3.00065	3	3	1.19315	0	0.992828	0.992436	2.34e-05	7.02e-05	ENSG00000246449	25353	18_Quiescent/low_signal	0	0	0	0	0	0	1	1	NA
rs6479943	10:65646921-65648062	10	65647219	T	C	0.815789	0.968783	1	1	17.1117	0.35416	6.9e-05	0.382674	43.2094	4.44362	2	2	0.289333	0	0.995754	0.990081	3.52e-05	7.05e-05	ENSG00000213609	16093	17_Weak_repressed_polycomb	1	0	0	1	0	0	0	0	En-1_2|0|-8.00060631674999|4|-|10.120747118291|2.120140801541
rs356603	5:63351979-63352333	5	63352299	G	A	0.473684	0.459753	0.999158	0.999158	17.0965	0.272331	0.000197	0.464331	7.84141	3.25252	2	2	0.08516	0	0.990395	0.991009	3.55e-05	7.11e-05	ENSG00000178394	-94433	18_Quiescent/low_signal	1	1	0	0	0	0	1	1	TCF12_disc2|0|-9.482640125491|4|+|12.07178843728|2.589148311789
rs12988791	2:181520969-181522057	2	181521287	A	G	0.342105	0.626168	1	1	17.8227	0.591878	1.7e-05	0.472727	32.8015	5.52576	3	3	13.0115	0	0.994628	0.996241	2.42e-05	7.27e-05	ENSG00000225258	36212	10_Active_enhancer_2	0	0	0	0	0	0	0	1	AP-1_known4|0|11.781647045952|3|+|0.325268286609997|12.106915332562
rs2054100	2:138710198-138710658	2	138710230	C	G	0.631579	0.172336	0.998989	0.998989	18.7707	0.650769	0.004414	0.468455	16.6674	3.57746	5	5	4.87782	0	0.993402	0.992417	1.47e-05	7.37e-05	ENSG00000150540	-11393	18_Quiescent/low_signal	0	0	0	0	0	0	0	0	Pou2f2_disc1|0|5.25177181483|6|-|5.544983860492|10.796755675322
rs1942564	18:55726021-55726451	18	55726105	G	A	0.684211	4.99671	1	1	19.4082	0.729128	2.4e-05	0.552962	10.992	3.02182	7	7	0	0	0.995373	0.995589	1.06e-05	7.39e-05	ENSG00000049759	14401	6_Weak_transcription	0	0	0	0	0	0	0	0	NA
rs1856308	6:101861682-101861985	6	101861858	C	T	0.105263	0.262976	1	1	18.3227	0.74358	0.002466	0.575213	19.7282	3.82945	3	4	0	0	0.982984	0.98807	1.86e-05	7.46e-05	ENSG00000164418	15017	18_Quiescent/low_signal	1	1	0	0	0	0	0	0	Nrf-2_3|0|11.96616132912|4|-|1.03534361472001|13.00150494384
rs9523150	13:91519495-91519943	13	91519800	T	C	0.342105	0.626168	1	1	16.9997	0.596539	2.6e-05	0.483855	35.8715	4.54214	2	2	2.72521	0	0.994772	0.996222	3.74e-05	7.48e-05	ENSG00000231674	59356	18_Quiescent/low_signal	1	1	0	1	1	0	1	0	ZEB1_known2|0|11.966193527112|7|+|-0.920302805440009|11.045890721672
rs17314234	4:156810443-156811189	4	156810755	C	T	0.105263	0.262976	1	1	19.6061	0.250206	1.1e-05	0.530512	23.729	4.5008	6	8	0.326634	0	0.9936	0.987999	9.52e-06	7.61e-05	ENSG00000151790	-14405	10_Active_enhancer_2	0	1	0	0	0	0	1	0	Ets_disc2|0|-11.966230938826|7|+|12.43503390269|0.468802963863993
rs3817867	6:169966916-169967474	6	169967114	A	G	0.657895	0.051986	0.97173	0.97173	18.6199	0.266785	6.6e-05	0.373339	6.65454	3.63719	5	5	0	0	0.961042	0.938461	1.6e-05	7.98e-05	ENSG00000184465	135243	6_Weak_transcription	0	0	0	0	0	0	0	0	AP-2_known4|0|-1.759375480005|1|-|11.65374129184|9.89436581183499
rs7579181	2:10549055-10549674	2	10549357	G	A	0.263158	0.139592	0.999458	0.999458	16.8685	0.385263	1.5e-05	0.48326	37.6897	4.4905	2	2	7.8571	0	0.939335	0.994063	4.01e-05	8.01e-05	ENSG00000206633	37920	10_Active_enhancer_2	0	0	0	1	1	0	0	0	NA
rs10605457	18:28810325-28810918	18	28810467	AGTT	A	0.394737	0.85067	0.99989	0.99989	19.7323	0.64637	0.001569	0.510957	19.4206	5.19027	9	9	0	0	0.992548	0.988772	8.91e-06	8.02e-05	ENSG00000134765	-67506	10_Active_enhancer_2	1	1	0	0	0	0	1	0	Maf_known3|0|3.34340296776|14|-|9.76348031479999|13.10688328256
rs9881832	3:12829006-12829289	3	12829036	C	T	0.421053	0.353306	0.999032	0.999032	18.6042	0.698303	0.002339	0.551112	8.42028	3.05043	5	5	0.225959	0	0.993541	0.99517	1.61e-05	8.04e-05	ENSG00000213943	1164	18_Quiescent/low_signal	0	0	0	1	1	0	0	0	AP-4_1|0|11.96619488577|7|-|-6.95692882116001|5.00926606461002
rs117594293	11:100589921-100590934	11	100590682	G	T	0.105263	0.262976	0.980037	0.980037	19.1945	0.364643	0.000976	0.502451	31.2136	5.39255	8	7	2.31419	0	0.983508	0.966559	1.18e-05	8.26e-05	ENSG00000248027	-31235	10_Active_enhancer_2	1	1	0	0	1	1	1	1	Rad21_disc10|0|-11.966141054017|2|-|11.552640619894|-0.413500434122994
rs3829511	16:87902481-87903536	16	87903340	C	A	0.131579	0.43618	0.956988	0.956988	20.2018	0.240423	0.003691	0.378541	1.40786	5.64665	13	12	7.79741	0	0.859537	0.779692	6.97e-06	8.36e-05	ENSG00000247249	-11	1_Active_TSS	0	0	0	0	1	1	0	0	CHD2_disc3|0|-11.539226666905|6|-|10.560360152965|-0.978866513940005
rs2823037	21:16452860-16453299	21	16453167	C	T	0.342105	0.626168	0.987883	0.987883	16.7778	0.300586	0.002968	0.535243	15.9388	3.43536	2	2	0.227378	0	0.973018	0.976452	4.2e-05	8.4e-05	ENSG00000236471	13468	18_Quiescent/low_signal	0	0	0	0	0	0	1	1	Homez|0|-6.21865432477199|8|+|12.480431316306|6.26177699153401
rs59713295	3:195886838-195887900	3	195887689	C	A	0.052632	0.058642	1	1	18.5137	0.257286	0.000354	0.607689	25.0153	5.07951	9	5	9.66082	0	0.987389	0.978694	1.69e-05	8.43e-05	ENSG00000224652	17330	9_Active_enhancer_1	1	1	1	0	1	1	1	1	Pou5f1_known2|0|-10.277324436967|4|+|12.03460028295|1.757275845983
rs567050795	16:67595721-67597549	16	67596818	A	C	0.289474	0.43618	0.701593	0.701593	18.0743	0.302473	0.002163	0.356113	10.4692	6.72812	5	4	42.2215	0	0.682329	0.314342	2.12e-05	8.5e-05	ENSG00000102974	-590	1_Active_TSS	0	0	0	1	1	1	0	0	NA
rs1163670	12:81273592-81273756	12	81273650	T	A	0.815789	4.28064	1	1	16.7539	0.267954	8e-05	0.455307	23.0363	3.11798	2	2	0	0	0.993395	0.995401	4.26e-05	8.51e-05	ENSG00000207763	-47184	18_Quiescent/low_signal	0	0	0	0	0	0	0	0	LUN-1|0|-11.966199552645|1|+|3.13512187326501|-8.83107767937997
rs59345896	2:10107395-10107686	2	10107490	G	C	0.342105	3.27834	0.998834	0.998834	16.7506	0.233208	7e-05	0.439345	5.14042	3.07822	2	2	0	0	0.993429	0.993766	4.26e-05	8.53e-05	ENSG00000134317	15572	6_Weak_transcription	1	1	1	0	1	1	1	0	RREB-1_2|0|-11.966143948071|9|-|2.049725388647|-9.91641855942399
rs1106242	9:77844703-77845267	9	77844985	C	T	0.552632	1.23453	1	1	16.7307	0.344037	2.3e-05	0.477712	11.4159	4.92382	2	2	2.66343	0	0.99677	0.996777	4.31e-05	8.62e-05	ENSG00000212316	31715	18_Quiescent/low_signal	1	0	1	0	0	0	0	0	GR_disc5|0|-11.72113517152|4|-|12.054677494984|0.333542323464002
rs2644700	17:782799-783229	17	783049	C	T	0.157895	0.667969	0.939477	0.939477	18.0352	0.253071	3.5e-05	0.482456	4.57374	2.96212	4	4	2.14554	0	0.974434	0.749348	2.17e-05	8.67e-05	ENSG00000167699	-96294	6_Weak_transcription	0	0	0	1	0	0	0	0	NA
rs11767313	7:23584417-23584811	7	23584522	C	A	0.105263	19	0.999441	0.999441	17.4807	0.235569	0.004253	0.510499	12.663	3.85349	2	3	0	0	0.97709	0.961295	2.9e-05	8.71e-05	ENSG00000164548	-12757	11_Weak_enhancer	1	0	0	1	1	0	0	0	SMC3_disc2|0|-10.329436488702|6|-|11.066114627634|0.736678138931993
rs11591601	10:132960639-132960839	10	132960721	G	A	0.315789	0.902531	0.963897	0.963897	17.4688	0.276329	7.1e-05	0.486591	9.417	2.64522	3	3	1.11026	0	0.977554	0.923809	2.92e-05	8.76e-05	ENSG00000223835	62670	10_Active_enhancer_2	0	0	0	0	0	1	1	1	SMC3_disc3|0|-5.22127141390399|11|+|10.990403007731|5.76913159382701
rs9297995	8:59458253-59458517	8	59458402	C	T	0.447368	1.23453	0.999681	0.999681	15.384	0.699223	0.000274	0.535744	15.6185	2.7074	1	1	0	0	0.995665	0.995665	8.77e-05	8.77e-05	ENSG00000137575	-7476	18_Quiescent/low_signal	1	0	0	0	0	0	0	0	Maf_known4|0|6.73343462298501|9|+|5.04395294770699|11.777387570692
rs62171337	2:125512972-125513880	2	125513212	T	C	0.342105	1.5558	1	1	18.0086	0.643223	0.005249	0.65198	23.2945	4.17135	4	4	0.103508	0	0.948551	0.993524	2.2e-05	8.8e-05	ENSG00000240282	-74402	18_Quiescent/low_signal	0	0	1	0	0	0	0	1	MIF-1|0|11.966186889734|15|+|2.70385458109601|14.67004147083
rs28595855	5:135418083-135418378	5	135418325	C	A	0.157895	0.667969	0.999802	0.999802	16.6888	0.248397	0.00307	0.413647	20.2276	3.48214	2	2	2.25841	0	0.99668	0.987367	4.4e-05	8.81e-05	ENSG00000202030	-1798	6_Weak_transcription	1	0	0	1	0	0	0	1	CTCF_disc2|0|-11.966227810912|5|-|8.48473427940598|-3.481493531506
rs558091192	8:74888214-74888898	8	74888338	C	A	0.236842	0.006973	0.999709	0.999709	19.5473	0.269155	0.006382	0.343137	1.2418	5.85984	9	9	82.5304	0	0.973129	0.989141	9.81e-06	8.83e-05	ENSG00000175606	-217	1_Active_TSS	0	0	0	0	1	1	0	0	NA
rs2789028	6:121162667-121163472	6	121163106	G	A	0.342105	0.626168	0.999417	0.999417	17.9846	0.312639	0.006257	0.448591	18.6128	4.02139	3	4	0	0	0.984195	0.995624	2.23e-05	8.91e-05	ENSG00000216710	60300	18_Quiescent/low_signal	1	0	0	0	1	0	0	0	NA
rs11069845	13:111103355-111103474	13	111103362	C	A	0.605263	3.83512	1	1	15.3432	0.293594	0.000218	0.361997	14.838	2.77223	1	1	0	0	0.995721	0.995721	8.96e-05	8.96e-05	ENSG00000224821	17408	17_Weak_repressed_polycomb	0	0	0	0	0	0	0	1	Znf143_known1|0|-11.966212867986|8|+|9.61078285334|-2.355430014646
rs3772899	3:81733737-81734372	3	81734097	C	G	0.394737	0.001437	0.97017	0.97017	15.3235	0.672946	5.1e-05	0.6674	14.7836	4.88258	1	1	0	0	0.914001	0.914001	9.06e-05	9.06e-05	ENSG00000241319	-71781	11_Weak_enhancer	1	0	0	0	0	0	0	0	Pou2f2_known5|0|2.43053885502|3|+|9.72073069084|12.15126954586
rs61778042	1:22351482-22352709	1	22351947	G	T	0.184211	0.968783	0.983328	0.983328	18.9745	0.263532	0.002393	0.581207	1.5601	5.06511	6	7	25.9673	0	0.97712	0.866857	1.32e-05	9.27e-05	ENSG00000218510	-200	1_Active_TSS	0	0	0	0	1	1	1	1	1
rs10205331	2:54799426-54800309	2	54799560	G	T	0.342105	1.5558	0.967403	0.967403	18.3231	0.389286	0.00197	0.429545	18.5955	4.5759	6	5	4.92039	0	0.979458	0.948004	1.86e-05	9.32e-05	ENSG00000234943	-25612	10_Active_enhancer_2	1	1	1	0	0	1	0	0	NA
rs2837342	21:41352739-41353334	21	41353003	A	G	0.315789	4.04734	1	1	18.3114	0.637764	0.009177	0.468886	32.8868	4.00571	5	5	0.187418	0	0.973037	0.980028	1.88e-05	9.38e-05	ENSG00000183036	113495	10_Active_enhancer_2	1	1	0	0	0	1	1	1	NA
rs60772006	12:30948061-30949744	12	30948109	G	GT	0.157895	0.667969	0.990438	0.990438	19.6271	0.381265	1.1e-05	0.461635	52.7478	5.57188	8	10	1.09358	0	0.946748	0.975245	9.41e-06	9.41e-05	ENSG00000235884	83	10_Active_enhancer_2	0	0	0	0	1	1	0	0	CACD_2|0|-11.294028854472|3|+|11.06754372618|-0.226485128291998
rs138521378	6:119314535-119315214	6	119314678	CT	C	0.157895	0.667969	0.999802	0.999802	17.8758	0.720034	0.010266	0.516366	20.9008	3.89934	4	4	0	0	0.994553	0.986315	2.36e-05	9.43e-05	ENSG00000111877	-58232	6_Weak_transcription	0	0	0	0	1	0	0	0	NA
rs4940779	18:56609797-56610128	18	56610006	A	G	0.263158	0.139592	1	1	16.5551	0.716078	6.6e-05	0.557206	14.998	3.80331	2	2	0	0	0.993747	0.99437	4.73e-05	9.45e-05	ENSG00000224367	-54170	6_Weak_transcription	1	0	0	0	0	0	0	0	HNF4_disc2|0|11.966074756116|8|+|3.13994070429999|15.106015460416
rs904556	11:36177436-36178456	11	36177551	A	G	0.631579	0.325822	1	1	17.8575	0.332289	0.004634	0.32202	15.5313	4.31592	6	4	4.21474	0	0.986427	0.993797	2.38e-05	9.52e-05	ENSG00000245202	-116408	10_Active_enhancer_2	1	0	0	1	0	1	0	1	NA
rs4961355	8:142299428-142299862	8	142299511	A	T	0.368421	0.172336	0.997095	0.997095	16.5238	0.678209	7.9e-05	0.666492	10.0886	3.81886	2	2	1.02204	0	0.992682	0.990762	4.8e-05	9.61e-05	ENSG00000022567	-35100	10_Active_enhancer_2	0	0	0	0	0	1	0	0	Bach1|0|11.96610935299|11|-|-2.53359399188|9.43251536111001
rs1008208	4:2403744-2404370	4	2404267	C	G	0.394737	0.001437	0.998036	0.998036	19.5795	0.618943	1e-05	0.407022	21.8297	4.51353	10	10	1.65075	0	0.990519	0.992783	9.65e-06	9.65e-05	ENSG00000159733	16625	10_Active_enhancer_2	0	0	1	0	1	1	0	0	Sin3Ak-20_disc5|0|0.00813524195700666|1|-|10.99646285913|11.004598101087
rs773507	9:93974348-93974794	9	93974553	G	T	0.578947	0.353306	1	1	16.5122	0.677723	3e-05	0.555464	19.1775	3.70615	3	2	0	0	0.99023	0.995623	4.83e-05	9.67e-05	ENSG00000230147	-42021	1_Active_TSS	0	1	0	0	1	1	1	0	STAT_disc3|0|11.464557287937|12|+|-5.688309731724|5.77624755621301
rs4475317	6:36875645-36875989	6	36875828	A	G	0.184211	0.294145	0.998078	0.998078	15.1985	0.734897	0.000214	0.596932	13.2572	3.63553	1	1	0	0	0.99059	0.99059	9.68e-05	9.68e-05	ENSG00000242045	-20711	10_Active_enhancer_2	0	0	0	0	0	1	0	0	CHD2_disc3|0|11.25002009796|11|+|-0.923902170624999|10.326117927335
rs2712149	4:169422466-169422917	4	169422705	T	C	0.578947	0.353306	1	1	17.2026	0.357878	1.8e-05	0.453558	25.2556	4.50966	3	3	0	0	0.996047	0.995782	3.36e-05	0.000100792	ENSG00000129116	4248	10_Active_enhancer_2	1	0	0	0	0	0	0	0	NA
rs1804826	19:18499152-18499756	19	18499238	G	T	0.236842	0.006973	1	1	16.4281	0.361413	3.1e-05	0.544914	38.3846	4.36878	2	2	2.19724	0	0.991608	0.989213	5.05e-05	0.000101061	ENSG00000130513	2183	1_Active_TSS	0	0	0	1	1	0	0	0	BCL_disc9|0|-11.044562998612|2|+|10.732106628364|-0.312456370248
rs17202482	6:88714411-88714626	6	88714426	G	A	0.157895	0.667969	1	1	15.1047	0.759592	0.000272	0.676217	13.7428	3.15087	1	1	0	0	0.986583	0.986583	0.000101711	0.000101711	ENSG00000118434	-43097	17_Weak_repressed_polycomb	0	0	0	0	0	0	1	0	Foxm1|0|11.229412653342|3|+|0.679968083727005|11.909380737069
rs72737192	1:182038183-182038539	1	182038268	C	T	0.078947	0.139592	0.999638	0.999638	15.0812	0.249436	6.7e-05	0.26039	25.5383	3.77097	1	1	2.17316	0	0.983359	0.983359	0.000102983	0.000102983	ENSG00000224810	205	17_Weak_repressed_polycomb	0	0	0	1	0	0	0	0	PLAG1|0|-2.99712961296001|14|-|10.78236186756|7.7852322546
rs7768945	6:22665072-22665524	6	22665317	T	C	0.394737	0.001437	0.99989	0.99989	17.7041	0.340391	3.6e-05	0.342602	23.0778	3.67125	4	4	0.097425	0	0.99172	0.994864	2.58e-05	0.000103228	ENSG00000244114	26383	18_Quiescent/low_signal	1	0	0	0	0	0	0	0	Roaz_1|0|-11.96617970008|3|-|-0.979474459590023|-12.94565415967
rs10832701	11:16946172-16947608	11	16947464	G	C	0.131579	0.43618	0.99132	0.99132	18.1196	0.614528	0.001634	0.502724	26.9548	5.78599	5	5	11.9368	0	0.996304	0.981229	2.07e-05	0.000103728	ENSG00000242514	49858	1_Active_TSS	0	0	0	0	1	1	1	0	BCL_disc10|0|1.320135748344|5|+|8.91810434967|10.238240098014
rs55651034	20:25064314-25064605	20	25064525	A	C	0.368421	5.69785	0.999887	0.999887	16.3565	0.708157	0.009835	0.643342	9.0779	2.95403	2	2	0	0	0.996147	0.996296	5.25e-05	0.000104952	ENSG00000100987	-1318	2_Weak_TSS	0	0	0	0	0	0	0	0	NF-I_1|0|10.966442297398|3|+|-6.30370166229798|4.66274063509999
rs80323506	6:47999767-48000357	6	48000098	G	A	0.236842	0.006973	0.977365	0.977365	18.0801	0.324744	0.005093	0.347467	31.7385	4.42289	3	5	9.39028	0	0.987173	0.970844	2.12e-05	0.000105902	ENSG00000244694	36622	18_Quiescent/low_signal	1	1	0	1	0	0	1	1	Bach1|0|-10.99874884485|8|+|11.75315738949|0.75440854464
rs12778650	10:59742827-59743649	10	59743376	A	G	0.526316	1.35111	0.998314	0.998314	20.2721	0.388021	0.002598	0.506017	15.7459	4.79245	17	16	15.0518	0	0.981212	0.993164	6.72e-06	0.000107476	ENSG00000223841	27771	6_Weak_transcription	0	0	0	0	0	0	0	0	Nkx3_2|0|-4.241092690863|2|-|13.001228|8.76013530913701
rs73221117	4:721068-721607	4	721340	T	G	0.105263	3.6981	0.943506	0.943506	16.3058	0.785482	9.7e-05	0.54604	12.562	3.94054	2	2	0	0	0.981271	0.951315	5.39e-05	0.000107795	ENSG00000185619	21530	10_Active_enhancer_2	0	0	0	0	0	1	0	0	NA
rs12439947	15:40559144-40559497	15	40559204	T	A	0.184211	0.294145	0.97917	0.97917	16.3057	0.276212	9.9e-05	0.310197	19.7451	3.40216	1	2	0	0	0.973079	0.973079	5.39e-05	0.000107803	ENSG00000176753	-14034	10_Active_enhancer_2	0	0	0	0	0	0	0	0	FXR_1|0|-11.966106159507|10|+|6.631852134643|-5.33425402486398
rs7320023	13:91878294-91878864	13	91878690	A	G	0.105263	3.6981	0.999721	0.999721	14.9819	0.713209	2.8e-05	0.60794	24.9833	3.89309	3	1	0	0	0.981285	0.992047	0.000108547	0.000108547	ENSG00000214178	46537	18_Quiescent/low_signal	1	0	0	0	0	0	0	1	NA
rs34837241	3:152787306-152788327	3	152787953	T	TC	0.315789	0.012492	0.999878	0.999878	16.2865	0.694327	3.4e-05	0.338085	12.5628	4.00421	3	2	0	0	0.991363	0.99235	5.45e-05	0.000108901	ENSG00000241810	2238	18_Quiescent/low_signal	0	0	0	0	0	0	0	1	MAZR|0|11.67544837714|11|-|-0.489061611959997|11.18638676518
rs232816	1:59084016-59084301	1	59084139	A	G	0.605263	8.08128	1	1	17.0468	0.333463	0.006738	0.523171	15.8222	3.59342	2	3	9.90646	0	0.989343	0.974669	3.65e-05	0.000109407	ENSG00000185839	13186	6_Weak_transcription	0	0	0	0	0	0	0	0	NA
rs111745958	18:7889559-7890462	18	7889740	T	TGAGTCATAA	0.394737	0.996253	0.98917	0.98917	17.5839	0.738046	2.7e-05	0.607385	11.6888	4.12391	5	4	0	0	0.988343	0.983647	2.75e-05	0.000109962	ENSG00000199856	-106010	6_Weak_transcription	0	0	0	0	1	1	1	0	AP-1_disc3|0|35.055715881355|2|+|-20.145478619121|14.910237262234
rs4147103	1:31255839-31256005	1	31255905	T	C	0.552632	0.033543	0.902833	0.902833	14.952	0.699263	0.000244	0.711256	18.7532	2.6607	1	1	0	0	0.859507	0.859507	0.00011028	0.00011028	ENSG00000162511	-25156	17_Weak_repressed_polycomb	0	0	0	1	0	0	0	0	1
rs9634583	13:110389890-110390348	13	110390318	G	C	0.368421	0.325822	0.997638	0.997638	16.252	0.327916	0.000154	0.580825	8.44393	3.73999	2	2	3.08552	0	0.981847	0.984795	5.55e-05	0.000110905	ENSG00000234854	9260	6_Weak_transcription	0	0	1	0	1	0	0	0	Mef2_known5|0|-5.59720968173201|8|-|-0.100444057646996|-5.69765373937901
rs6105631	20:16555391-16556029	20	16555620	G	C	0.236842	0.006973	0.999709	0.999709	16.2471	0.360869	2.4e-05	0.422234	27.2623	4.86393	2	2	1.48183	0	0.99608	0.994369	5.56e-05	0.000111188	ENSG00000089177	-1313	2_Weak_TSS	0	0	0	0	1	1	0	0	RXRA_disc2|0|-10.355317848316|16|-|11.591735483056|1.23641763473999
rs72803386	2:62520506-62521315	2	62520937	A	G	0.105263	0.262976	1	1	18.623	0.331998	1.1e-05	0.423804	29.3792	4.4459	7	7	1.66379	0	0.995491	0.98181	1.59e-05	0.000111499	ENSG00000238809	28375	1_Active_TSS	1	0	1	0	1	1	0	0	Rad21_disc7|0|-0.656025884819996|3|-|10.994125604092|10.338099719272
rs899356	5:172260760-172261574	5	172260869	G	A	0.710526	0.43618	0.99674	0.99674	17.5536	0.40466	0.001945	0.480183	42.9657	5.09097	5	4	5.97636	0	0.989557	0.988516	2.79e-05	0.000111727	ENSG00000113719	-519	10_Active_enhancer_2	0	0	0	0	1	1	0	0	AP-1_disc5|0|-11.966117533375|2|-|13.59405776075|1.62794022737501
rs1630642	10:73804288-73804863	10	73804620	C	T	0.447368	0.033543	0.999681	0.999681	17.5524	0.666664	2.6e-05	0.488679	14.5297	4.14085	4	4	1.9463	0	0.996445	0.995935	2.8e-05	0.000111802	ENSG00000107742	44502	10_Active_enhancer_2	1	0	1	1	1	1	0	0	GR_disc1|0|4.73703035639399|4|-|9.39351446461001|14.130544821004
rs1541475	7:123793040-123793817	7	123793455	A	G	0.552632	1.23453	0.999362	0.999362	14.9146	0.36907	1.9e-05	0.393926	21.9801	4.7528	4	1	0	0	0.993687	0.996521	0.000112487	0.000112487	ENSG00000234224	-119517	18_Quiescent/low_signal	0	0	0	1	0	0	0	0	NA
rs1886422	1:109631945-109632111	1	109632020	G	A	0.157895	0.667969	0.944427	0.944427	14.9136	0.239957	9.7e-05	0.398078	18.1115	2.97869	1	1	0	0	0.919714	0.919714	0.000112551	0.000112551	ENSG00000215717	1061	17_Weak_repressed_polycomb	0	0	0	1	0	0	1	0	1
rs6725264	2:71470883-71471094	2	71471041	G	C	0.105263	0.262976	0.999441	0.999441	16.2107	0.238088	2.7e-05	0.584868	15.3317	2.70158	3	2	2.76824	0	0.971021	0.98554	5.67e-05	0.000113343	ENSG00000124374	-16670	18_Quiescent/low_signal	1	1	0	0	0	0	1	1	NA
rs11159798	14:87427394-87428045	14	87427642	T	C	0.421053	0.120222	0.980496	0.980496	16.9557	0.376594	3e-05	0.543522	18.6667	4.05975	3	3	5.55328	0	0.9825	0.968709	3.83e-05	0.000114784	ENSG00000054983	1032513	17_Weak_repressed_polycomb	1	1	0	1	0	0	1	0	NA
rs2298684	21:38444697-38446533	21	38445095	G	A	0.421053	1.65857	0.999784	0.999784	20.1032	0.584333	0.004699	0.458322	11.8488	6.78835	20	16	3.77178	100	0.936862	0.993887	7.34e-06	0.000117401	ENSG00000182670	-830	1_Active_TSS	0	0	0	1	1	1	0	0	Pax-4_1|0|2.0680115713|9|-|9.29413412859999|11.3621456999
rs869332	7:102631977-102632596	7	102632247	A	G	0.315789	1.37722	1	1	14.7751	0.365497	4.9e-05	0.395329	27.9499	4.60689	1	1	0	0	0.996352	0.996352	0.000121127	0.000121127	ENSG00000230257	18007	10_Active_enhancer_2	1	0	0	0	0	0	1	0	NA
rs6567107	18:52259846-52260213	18	52259903	A	C	0.473684	0.058642	1	1	14.7619	0.687382	0.000319	0.532403	25.7565	3.10036	1	1	0	0	0.99414	0.99414	0.000121978	0.000121978	ENSG00000178690	1455	17_Weak_repressed_polycomb	0	0	0	0	0	0	0	1	NA
rs34233878	18:42594159-42594389	18	42594280	T	C	0.105263	0.262976	0.901708	0.901708	14.7493	0.760702	6.6e-05	0.5893	18.7929	4.26601	1	1	0	0	0.868111	0.868111	0.000122794	0.000122794	ENSG00000152217	334020	6_Weak_transcription	0	0	0	1	0	0	0	0	RXRA_known5|0|11.913726758196|15|+|-4.12560216404199|7.788124594154
rs6889388	5:95874498-95874885	5	95874619	A	G	0.552632	0.033543	1	1	17.3598	0.689877	6.4e-05	0.609495	21.8571	3.11011	4	4	0	0	0.993871	0.994679	3.09e-05	0.000123719	ENSG00000238518	51482	18_Quiescent/low_signal	1	0	0	0	0	0	0	0	Tgif1_1|0|11.966121158799|5|+|0.128348403646015|12.094469562445
rs62271800	3:145236424-145236733	3	145236636	G	A	0.078947	0.139592	1	1	17.3578	0.20076	4.7e-05	0.580874	4.58307	2.7573	3	4	3.48751	0	0.988042	0.978807	3.1e-05	0.000123852	ENSG00000244024	-4902	18_Quiescent/low_signal	1	0	0	0	0	0	0	0	ELF1_disc1|0|-4.309360712982|9|+|13.195423390296|8.886062677314
rs11763051	7:50602481-50602952	7	50602627	T	C	0.894737	0.262976	1	1	16.802	0.344031	0.00117	0.385043	31.8739	5.85142	3	3	5.16375	0	0.997305	0.988074	4.15e-05	0.000124472	ENSG00000226122	3023	10_Active_enhancer_2	1	0	0	0	1	0	0	1	GR_disc6|0|-0.198657978452005|13|-|11.2852870576|11.086629079148
rs11360780	3:59745161-59745819	3	59745695	TG	T	0.157895	0.824653	0.998421	0.998421	18.889	0.322116	0.001828	0.492909	25.8121	3.7117	6	9	0.418481	0	0.988778	0.98922	1.39e-05	0.000124696	ENSG00000241804	223571	18_Quiescent/low_signal	0	0	1	0	1	0	1	0	HNF4_disc3|0|-25.133268803617|6|-|15.889177418331|-9.244091385286
rs6448740	4:31052803-31053086	4	31053009	C	G	0.684211	0.012492	0.999757	0.999757	14.6913	0.28203	0.000164	0.414337	10.6075	3.37377	1	1	0	0	0.988771	0.988771	0.000126626	0.000126626	ENSG00000223474	-46404	18_Quiescent/low_signal	0	0	0	0	0	0	0	0	AP-1_disc3|0|-11.96616527103|7|+|10.322149358913|-1.644015912117
rs7549150	1:221661041-221661706	1	221661342	C	T	0.052632	0.058642	0.995798	0.995798	17.2985	0.286152	0.001676	0.406847	24.5092	4.58346	5	4	1.29364	0	0.945006	0.977295	3.19e-05	0.000127774	ENSG00000232436	-20861	17_Weak_repressed_polycomb	1	1	0	0	0	0	1	1	1
rs10807437	6:13414328-13414598	6	13414584	A	C	0.289474	0.206997	1	1	15.9699	0.314437	8.5e-05	0.401138	14.4563	2.81342	2	2	4.23444	0	0.99458	0.992754	6.44e-05	0.000128717	ENSG00000246048	-55179	10_Active_enhancer_2	0	0	0	1	0	0	0	0	Ets_known7|0|-11.766896163125|10|+|11.426756118835|-0.340140044289996
rs1036582	3:105150049-105150399	3	105150301	G	C	0.815789	0.294145	1	1	14.6421	0.321123	4.6e-05	0.339075	25.2622	4.43871	1	1	0	0	0.993427	0.993427	0.000129976	0.000129976	ENSG00000170017	64335	10_Active_enhancer_2	0	0	0	0	0	0	0	1	Mxi1_disc1|0|-6.27522314917499|13|+|12.57191267821|6.29668952903501
rs79219374	3:192850656-192851197	3	192850984	T	G	0.210526	0.0475	1	1	17.6824	0.61889	0.002299	0.477619	23.9555	5.02255	4	5	7.40886	0	0.993205	0.994149	2.61e-05	0.000130512	ENSG00000236229	24341	18_Quiescent/low_signal	1	1	0	0	0	0	0	0	Bsx|0|6.19173619361499|5|-|6.44614484794999|12.637881041565
rs7843726	8:127817340-127817649	8	127817460	C	G	0.157895	0.667969	0.997434	0.997434	15.9422	0.779769	0.000284	0.512616	8.49474	2.36907	2	2	0	0	0.939904	0.983919	6.53e-05	0.000130614	ENSG00000212451	133572	18_Quiescent/low_signal	0	0	0	0	0	0	0	0	Pax-5_known3|0|0.584599883140015|27|-|5.80222363335599|6.38682351649601
rs17197055	5:10913760-10914414	5	10914119	C	A	0.368421	0.325822	0.999774	0.999774	17.9906	0.592513	0.000575	0.502684	38.0197	5.18887	7	6	4.24172	0	0.987636	0.995064	2.22e-05	0.000133196	ENSG00000207312	-113553	10_Active_enhancer_2	1	1	1	0	0	0	1	1	NA
rs11188344	10:97288769-97289316	10	97288957	T	A	0.263158	0.139592	1	1	15.892	0.328472	4.6e-05	0.493232	15.5739	3.98074	2	2	0	0	0.994294	0.994341	6.71e-05	0.000134121	ENSG00000095637	32402	6_Weak_transcription	0	0	0	0	0	0	0	0	Foxj2_1|0|-1.191511576156|2|+|13.935112070656|12.7436004945
rs1449680	6:156335025-156335330	6	156335275	T	G	0.684211	0.012492	1	1	15.8912	0.750939	0.00011	0.455469	11.6031	2.49232	2	2	0	0	0.99573	0.993582	6.71e-05	0.000134183	ENSG00000212017	-65151	18_Quiescent/low_signal	0	0	1	0	1	0	0	0	Tel2|0|11.966073868234|1|-|-5.90813943285401|6.05793443537999
rs77900042	4:32987689-32988296	4	32988002	T	C	0.105263	0.262976	1	1	18.5213	0.768423	0.001282	0.651961	14.0723	4.37635	8	8	0	0	0.981923	0.987263	1.68e-05	0.00013441	ENSG00000239983	-982108	18_Quiescent/low_signal	1	0	0	0	0	0	0	0	CEBPB_known4|0|1.58227649266499|2|+|8.833770515386|10.416047008051
rs3762781	3:4928893-4929126	3	4928944	T	C	0.684211	0.012492	1	1	16.6534	0.763462	9.5e-05	0.654979	6.90288	3.19518	2	3	0	0	0.99366	0.994264	4.49e-05	0.000134613	ENSG00000235978	84	18_Quiescent/low_signal	1	1	0	0	1	0	0	0	Nrf-2_2|0|11.966189643089|4|-|-0.376029784804999|11.590159858284
rs2034400	7:17598378-17599471	7	17598628	T	G	0.789474	0.0475	0.953612	0.953612	18.2424	0.380968	0.0011	0.477041	25.8743	5.3066	7	7	12.6625	0	0.969616	0.891353	1.94e-05	0.000136148	ENSG00000226598	155	2_Weak_TSS	1	1	0	0	0	0	1	0	Pou3f2_1|0|-10.966511320796|9|+|11.634993507757|0.668482186961
rs2114653	2:153648386-153648905	2	153648587	A	G	0.263158	0.139592	1	1	16.6311	0.657324	2.2e-05	0.507112	18.1852	4.23123	3	3	1.33161	0	0.99369	0.98938	4.54e-05	0.0001362	ENSG00000234932	58952	18_Quiescent/low_signal	1	1	0	0	1	0	1	0	Sox_1|0|1.99838937060001|2|-|12.6953354257|14.6937247963
rs55754551	6:114040236-114041283	6	114040577	C	T	0.289474	3.15363	0.999744	0.999744	18.4853	0.310387	0.000102	0.433374	12.275	3.59207	9	8	0.017966	0	0.962063	0.793531	1.71e-05	0.000136974	ENSG00000221559	14176	18_Quiescent/low_signal	0	0	0	0	0	0	0	0	NA
rs1004367	2:168639796-168640800	2	168640408	G	A	0.605263	0.996253	1	1	18.1934	0.620131	0.000893	0.553479	25.8119	5.24354	6	7	-2e-06	0	0.995473	0.996588	2e-05	0.000139695	ENSG00000172318	-35387	10_Active_enhancer_2	1	1	1	0	1	1	1	1	EBF_known2|0|11.966039940745|2|-|2.09415670384499|14.06019664459
rs12902074	15:78202771-78203358	15	78203237	C	T	0.315789	1.37722	0.85928	0.85928	19.5089	0.389119	0.003874	0.432764	22.8534	4.41413	16	14	0.914456	0	0.828377	0.834662	1e-05	0.000140187	ENSG00000225033	5497	2_Weak_TSS	0	0	0	1	1	1	0	0	NA
rs2662530	5:10267368-10268154	5	10267721	T	A	0.605263	0.996253	0.991691	0.991691	17.1218	0.678997	3.6e-05	0.712193	13.1349	4.29803	4	4	0	0	0.992193	0.989239	3.51e-05	0.000140229	ENSG00000150753	17098	6_Weak_transcription	1	0	1	0	0	0	0	0	RXRA_known5|0|4.44988661014199|18|+|4.74493861245199|9.19482522259398
rs2397105	6:52652957-52653632	6	52653324	G	A	0.631579	1.96301	0.995829	0.995829	14.4584	0.335832	0.014651	0.451492	16.1852	3.94185	1	1	0	0	0.994594	0.994594	0.000143292	0.000143292	ENSG00000217228	-9812	2_Weak_TSS	1	0	0	0	1	0	0	0	NA
rs758752	19:57350191-57351426	19	57350197	A	G	0.631579	0.325822	0.977212	0.977212	17.8478	0.142199	0.009104	0.469195	1.41321	6.76208	7	6	99.9518	0	0.950336	0.756891	2.39e-05	0.00014358	ENSG00000198300	1884	1_Active_TSS	0	1	0	0	0	1	1	1	Pax-5_known3|0|-0.998918745551975|15|+|8.12141319003999|7.12249444448801
rs2426191	20:49261975-49262694	20	49262256	G	C	0.315789	0.012492	0.999878	0.999878	16.5253	0.331231	0.004685	0.376208	24.108	4.12401	3	3	0	0	0.993062	0.991112	4.8e-05	0.000144012	ENSG00000234693	-34	10_Active_enhancer_2	1	1	1	0	1	1	0	1	Bach1|0|-11.96622056942|10|-|9.02379498086|-2.94242558856
rs7234806	18:62285465-62285932	18	62285818	G	C	0.526316	0.058642	0.893576	0.893576	14.4372	0.261633	0.000215	0.378639	8.12392	3.77005	1	1	0	0	0.848914	0.848914	0.00014491	0.00014491	ENSG00000241919	-248532	18_Quiescent/low_signal	0	0	0	0	0	0	0	0	HNF1_5|0|-11.9660160042|2|+|12.222016680748|0.256000676547984
rs2275710	9:100934929-100935389	9	100935050	C	T	0.552632	0.033543	0.999894	0.999894	16.5119	0.704408	3.4e-05	0.496826	5.75014	4.01466	3	3	13.3165	0	0.990243	0.983713	4.83e-05	0.00014504	ENSG00000106789	19993	6_Weak_transcription	1	1	0	0	1	1	1	0	Foxj1_1|0|11.907373247044|11|+|-2.53447134774299|9.372901899301
rs72922017	18:51473274-51474015	18	51473500	T	C	0.210526	0.0475	1	1	17.05	0.737117	5.3e-05	0.485479	12.7942	4.12452	4	4	0	0	0.9909	0.994096	3.64e-05	0.000145631	ENSG00000221058	139752	18_Quiescent/low_signal	1	0	0	0	0	0	0	0	NA
rs185220	5:56205027-56206379	5	56205357	A	G	0.789474	0.0475	1	1	17.4505	0.611805	0.00091	0.48593	28.8375	6.93085	5	5	14.2513	0	0.996825	0.994275	2.95e-05	0.000147445	ENSG00000155542	-61	1_Active_TSS	0	1	0	0	1	1	0	0	TATA_disc4|0|11.96606824283|3|+|1.42872433877001|13.3947925816
rs78965347	2:114779704-114780560	2	114780053	C	A	0.131579	1.81521	0.973871	0.973871	15.6942	0.345102	0.001142	0.497278	26.3687	5.33495	3	2	0	0	0.973992	0.97431	7.45e-05	0.000148904	ENSG00000212182	-16472	10_Active_enhancer_2	1	1	1	0	0	1	1	0	HNF1_1|0|-11.895690869348|13|+|14.510097141109|2.614406271761
rs77888897	3:145661537-145661759	3	145661652	A	C	0.263158	2.42347	1	1	14.3619	0.242048	0.004404	0.352492	12.3751	3.49872	3	1	1.98737	0	0.981711	0.986807	0.000150821	0.000150821	ENSG00000244358	3837	10_Active_enhancer_2	0	0	0	0	0	0	0	0	BAF155_disc1|0|-11.96611411737|4|+|11.88270120076|-0.0834129166100013
rs16924082	12:21780775-21781572	12	21781141	A	G	0.184211	0.294145	0.999825	0.999825	18.5077	0.342778	0.001253	0.585558	11.3562	5.02066	8	9	4.50455	0	0.991741	0.993932	1.69e-05	0.000152298	ENSG00000245642	-7502	10_Active_enhancer_2	1	1	1	0	0	1	1	0	Foxj2_2|0|-11.795567530968|7|-|11.373388110438|-0.42217942053
rs7269614	20:45834332-45834594	20	45834507	A	G	0.289474	0.43618	1	1	14.3392	0.717863	0.000251	0.577692	13.5946	3.17862	1	1	0	0	0.991008	0.991008	0.000152654	0.000152654	ENSG00000215450	-43993	6_Weak_transcription	0	0	0	1	0	0	0	0	Myf_3|0|11.966116853812|12|+|-0.518890712716001|11.447226141096
rs60194945	2:7117345-7118041	2	7117659	T	C	0.078947	0.139592	1	1	16.3919	0.236073	3.5e-05	0.482898	9.81281	4.33502	2	3	3.73153	0	0.944783	0.983115	5.15e-05	0.000154512	ENSG00000234428	13225	6_Weak_transcription	1	1	0	0	1	1	0	0	p300_disc3|0|-11.966139133284|3|+|12.16464147206|0.198502338775995
rs11591506	10:134957426-134958134	10	134957873	C	T	0.131579	0.43618	0.923118	0.923118	19.1385	0.302827	0.000961	0.470647	4.46805	4.66277	15	13	19.8087	0	0.957338	0.825706	1.22e-05	0.000158041	ENSG00000235264	1382	17_Weak_repressed_polycomb	0	0	1	1	1	1	1	0	Gfi1b|0|-11.358719371425|8|+|10.77273861875|-0.585980752674999
rs9463970	6:53594992-53595336	6	53595083	C	T	0.210526	1.35111	0.963766	0.963766	14.2616	0.263342	8.9e-05	0.391626	20.0423	3.59581	1	1	0	0	0.875673	0.875673	0.000159081	0.000159081	ENSG00000227885	16828	6_Weak_transcription	1	1	0	0	0	1	1	0	NA
rs34260568	9:38682803-38683035	9	38682933	G	A	0.157895	6.93533	1	1	16.3338	0.665559	0.002733	0.543967	25.5071	3.4897	3	3	0	0	0.990472	0.995274	5.31e-05	0.000159325	ENSG00000242805	2799	17_Weak_repressed_polycomb	1	0	0	0	0	0	0	0	E2A_1|0|11.966146500316|6|+|-0.502459420696994|11.463687079619
rs2383436	14:33539574-33539929	14	33539762	A	G	0.342105	0.626168	0.99965	0.99965	16.3244	0.342967	0.000763	0.529483	17.6218	3.13589	3	3	4.44799	0	0.945983	0.99575	5.34e-05	0.000160116	ENSG00000151322	131124	6_Weak_transcription	0	0	0	0	0	0	0	0	Foxc1_1|0|-11.966106118866|7|-|10.629099703551|-1.337006415315
rs12662030	6:123091986-123092732	6	123092275	A	C	0.263158	0.139592	0.988236	0.988236	16.8696	0.615392	2.5e-05	0.553955	45.3413	4.52683	3	4	2.84579	0	0.985424	0.980592	4e-05	0.000160148	ENSG00000164434	-8635	18_Quiescent/low_signal	1	0	1	1	1	1	0	0	Rad21_disc7|0|1.98735799319999|2|+|11.851458000064|13.838815993264
rs670004	7:105364099-105364307	7	105364221	T	C	0.526316	1.35111	0.999895	0.999895	16.3183	0.737598	3.7e-05	0.691557	9.84219	3.19165	3	3	0	0	0.993077	0.993299	5.35e-05	0.000160637	ENSG00000226624	-95840	6_Weak_transcription	0	0	0	0	0	0	0	0	Irf_disc4|0|11.966086912725|6|-|-0.0212700983500014|11.944816814375
rs7122731	11:30206992-30207543	11	30207239	G	A	0.236842	0.006973	0.997969	0.997969	15.5389	0.755962	0.000199	0.57388	8.57994	3.55697	1	2	0	0	0.992467	0.992467	8.08e-05	0.000161651	ENSG00000131808	-45572	18_Quiescent/low_signal	1	0	0	0	0	0	0	0	Foxa_disc1|0|10.941465185917|1|+|2.388577167243|13.33004235316
rs2997559	9:7452324-7452678	9	7452476	A	G	0.736842	0.139592	0.998245	0.998245	16.8455	0.711529	4.4e-05	0.685278	11.6243	3.83074	4	4	3.65041	0	0.955013	0.888157	4.06e-05	0.000162201	ENSG00000230207	25996	18_Quiescent/low_signal	1	0	0	0	0	0	0	0	NA
rs2279339	10:60144032-60145771	10	60144998	C	A	0.236842	0.006973	1	1	18.3811	0.398368	0.003163	0.4986	22.7465	6.42379	9	9	11.6919	0	0.986653	0.994366	1.81e-05	0.000162761	ENSG00000108064	-751	18_Quiescent/low_signal	1	0	0	1	1	1	1	0	TATA_disc4|0|-5.30752847554|9|-|10.82775993293|5.52023145739
rs2410958	5:107142472-107142818	5	107142758	T	C	0.421053	1.65857	1	1	16.7829	0.675747	1.5e-05	0.618408	24.4642	4.70728	4	4	0.414342	0	0.969422	0.988978	4.19e-05	0.000167641	ENSG00000242762	-3856	10_Active_enhancer_2	1	0	0	0	0	0	0	0	NA
rs11759767	6:167196036-167196400	6	167196188	G	A	0.289474	0.43618	0.998851	0.998851	16.7792	0.728732	0.007517	0.558009	4.06806	3.21155	4	4	1.76226	0	0.99064	0.987804	4.2e-05	0.000167967	ENSG00000237578	42342	18_Quiescent/low_signal	0	0	0	0	0	0	0	0	E2A_1|0|11.966146500316|6|+|-0.501582761577993|11.464563738738
rs55953260	6:97386791-97387576	6	97386847	C	G	0.078947	0.139592	1	1	17.1978	0.361493	7e-06	0.520139	28.449	5.45686	5	5	4.14801	0	0.990458	0.983712	3.37e-05	0.000168409	ENSG00000186231	14294	10_Active_enhancer_2	1	1	0	0	1	0	1	1	ZBRK1|0|-1.41386354191201|12|+|10.131318794792|8.71745525287999
rs11622579	14:105689506-105689893	14	105689647	G	A	0.236842	1.40601	0.908129	0.908129	15.4518	0.729457	8.1e-05	0.517408	12.3545	3.91831	2	2	0	0	0.872473	0.889044	8.46e-05	0.00016927	ENSG00000184887	-25503	10_Active_enhancer_2	0	1	0	0	0	0	0	0	NA
rs1536165	1:84464088-84465404	1	84465073	C	A	0.447368	2.79807	0.998832	0.998832	17.1869	0.573234	0.002237	0.502368	34.5422	6.23698	7	5	8.77014	0	0.988985	0.992319	3.39e-05	0.000169383	ENSG00000137941	745	1_Active_TSS	0	0	0	0	1	1	0	0	Pax-4_3|0|11.878716461747|5|-|0.504480557012002|12.383197018759
rs1327602	1:81806864-81807449	1	81807097	C	T	0.631579	1.96301	1	1	16.7557	0.254231	9.7e-05	0.439308	13.181	3.24661	2	4	0	0	0.996141	0.996196	4.25e-05	0.000170061	ENSG00000117114	35018	18_Quiescent/low_signal	1	0	0	0	0	0	0	0	1
rs3922778	14:42920127-42920812	14	42920755	T	A	0.078947	0.139592	1	1	17.1622	0.697008	0.000637	0.508642	18.3189	5.59124	6	5	0.033171	0	0.985716	0.985125	3.43e-05	0.000171596	ENSG00000222084	150172	18_Quiescent/low_signal	1	1	0	0	0	1	1	1	Lhx3_2|0|7.29507447568199|5|+|4.305843738498|11.60091821418
rs4753748	11:96094858-96095386	11	96095083	A	G	0.631579	0.325822	1	1	14.107	0.321569	0.000114	0.405603	16.021	3.65204	1	1	0	0	0.994334	0.994334	0.000172703	0.000172703	ENSG00000184384	-19799	6_Weak_transcription	1	0	0	0	0	0	0	0	Foxc1_1|0|-11.966106118866|8|-|8.17303882261899|-3.79306729624699
rs884694	5:36301114-36302609	5	36301420	G	T	0.657895	0.051986	1	1	17.1328	0.652325	0.001713	0.674012	26.3671	5.36005	6	5	17.4248	0	0.992058	0.994937	3.49e-05	0.000174276	ENSG00000164188	890	10_Active_enhancer_2	1	0	0	0	1	0	1	0	Bach1|0|11.96610935299|5|+|0.0134846879800108|11.97959404097
rs11700398	21:47716171-47716721	21	47716552	G	A	0.447368	1.23453	1	1	17.763	0.675837	0.008791	0.625456	12.0876	4.12668	7	7	2e-06	0	0.98683	0.991523	2.5e-05	0.000175142	ENSG00000182362	9919	10_Active_enhancer_2	0	0	0	0	1	1	1	0	NA
rs10914019	1:180494521-180494708	1	180494646	T	C	0.710526	2.46609	1	1	16.1523	0.251549	8.1e-05	0.388873	11.2202	2.65294	3	3	0	0	0.996219	0.995894	5.84e-05	0.000175347	ENSG00000206905	-6266	6_Weak_transcription	0	0	0	0	0	0	0	0	1
rs1484096	18:35640552-35640859	18	35640599	A	G	0.421053	0.353306	1	1	14.0734	0.661664	0.017216	0.478858	30.1703	3.23225	1	1	0	0	0.995675	0.995675	0.000175817	0.000175817	ENSG00000243516	387899	18_Quiescent/low_signal	1	0	0	0	0	0	0	0	HNF1_3|0|8.79914920481602|3|-|2.55118691654901|11.350336121365
NA	4:130066081-130066592	4	130066189	A	<	0.315789	0.902531	0.979189	0.979189	16.1309	0.221781	0.000209	0.552765	9.119	3.11688	1	3	0	0	0.8991	0.957257	5.91e-05	0.000177333	ENSG00000151466	-51317	18_Quiescent/low_signal	0	0	0	0	1	0	0	0	NA
rs201050191	18:8800186-8801426	18	8800910	T	T	0.736842	0.139592	0.99283	0.99283	18.7368	0.355908	2e-05	0.459924	33.2246	4.31463	8	12	0.092638	0	0.986624	0.98295	1.5e-05	0.000180073	ENSG00000242187	-80056	6_Weak_transcription	0	0	0	0	0	0	0	0	Foxa_known2|0|-2.75003346888001|11|-|13.59472604799|10.84469257911
rs11908695	21:15435974-15437218	21	15436681	G	C	0.394737	0.001437	0.975633	0.975633	18.677	0.738713	0.023078	0.412233	0.945439	4.56361	13	12	0.289785	0	0.973461	0.966375	1.55e-05	0.000185811	ENSG00000201812	-7219	18_Quiescent/low_signal	0	0	0	0	0	0	0	0	Myc_known7|0|11.895770245052|5|+|0.275404634116001|12.171174879168
rs144604735	7:44151991-44152892	7	44152524	T	TG	0.263158	0.139592	0.984658	0.984658	15.2683	0.290757	0.000118	0.371563	14.8014	4.57653	1	2	1.09718	0	0.977327	0.958652	9.33e-05	0.000186533	ENSG00000106624	8030	10_Active_enhancer_2	0	0	0	1	1	0	0	0	Egr-1_known3|0|-10.061612404578|2|+|9.374210396948|-0.687402007629998
rs13429274	2:75617334-75617784	2	75617495	T	G	0.447368	0.554724	0.999575	0.999575	16.0274	0.302663	9.2e-05	0.284397	13.5703	3.47646	3	3	0	0	0.993535	0.993676	6.24e-05	0.000187295	ENSG00000238521	28741	10_Active_enhancer_2	1	0	0	0	1	0	0	1	Sox_6|0|-11.690595728544|1|-|10.216291|-1.474304728544
rs10911205	1:183009120-183009502	1	183009277	C	A	0.394737	0.85067	1	1	15.2294	0.325593	0.004458	0.448123	19.7203	3.88933	2	2	0.137553	0	0.99337	0.99302	9.52e-05	0.000190424	ENSG00000135862	16522	10_Active_enhancer_2	1	0	0	0	1	1	0	1	NA
rs9810370	3:170867280-170868044	3	170867700	T	A	0.605263	0.001437	0.983539	0.983539	15.9749	0.307387	8.2e-05	0.328954	11.1381	4.32824	2	3	0	0	0.928466	0.93147	6.42e-05	0.000192564	ENSG00000207963	-42732	6_Weak_transcription	1	1	0	0	1	0	1	0	HNF1_3|0|-11.796268606304|10|-|8.225123949036|-3.57114465726799
rs2016535	7:26622775-26623153	7	26623016	C	G	0.236842	1.82996	0.999709	0.999709	15.1946	0.286375	7.1e-05	0.574177	3.70153	3.65496	2	2	2.95451	0	0.99116	0.986266	9.7e-05	0.000193956	ENSG00000233760	31333	17_Weak_repressed_polycomb	1	1	0	0	0	0	0	0	NA
rs12125591	1:235793610-235794267	1	235794173	T	A	0.368421	0.172336	0.994864	0.994864	13.8766	0.63577	0.000641	0.682675	23.0683	4.76031	5	1	0	0	0.98809	0.991587	0.000195218	0.000195218	ENSG00000227236	15635	6_Weak_transcription	1	0	0	0	1	1	1	1	Foxa_known1|0|10.428038275965|3|-|1.622250066248|12.050288342213
rs35606860	2:242671968-242672239	2	242672133	T	C	0.289474	3.15363	0.893618	0.893618	17.2579	0.219799	0.005323	0.377792	11.6992	3.56896	8	6	0.79379	0	0.810212	0.711817	3.26e-05	0.000195804	ENSG00000180902	-2027	6_Weak_transcription	0	0	0	1	1	0	0	0	CTCF_disc6|0|-11.966217871608|1|-|13.161703228559|1.195485356951
rs1941137	18:7592331-7592918	18	7592888	C	T	0.315789	10.871	0.991917	0.991917	13.8619	0.366406	0.005268	0.473009	30.4474	3.44165	2	1	0	0	0.970845	0.966031	0.00019675	0.00019675	ENSG00000173482	24513	6_Weak_transcription	0	0	0	1	1	0	0	0	AP-4_1|0|-11.96619488577|8|-|6.59300268788999|-5.37319219788
rs2322683	3:4468158-4468869	3	4468598	C	T	0.605263	0.85067	0.998577	0.998577	13.8597	0.6236	0.005193	0.610123	33.2158	5.29185	2	1	0	0	0.995664	0.993103	0.000196977	0.000196977	ENSG00000234325	-11514	10_Active_enhancer_2	1	1	0	0	1	1	1	1	AP-4_1|0|10.64475077748|18|+|-5.63548471287001|5.00926606461002
rs9553357	13:25154576-25155104	13	25154909	G	A	0.184211	0.294145	0.996331	0.996331	13.857	0.314958	0.000194	0.382476	25.2651	3.43088	1	1	0	0	0.988444	0.988444	0.000197265	0.000197265	ENSG00000205822	13564	17_Weak_repressed_polycomb	1	1	0	1	1	0	0	0	ELF1_disc2|0|-11.624695072784|4|+|11.874836423276|0.250141350492001
rs943704	14:91261771-91262430	14	91262184	T	C	0.052632	0.058642	1	1	17.2434	0.267053	7e-06	0.513695	18.8356	4.45873	7	6	6.53277	0	0.976781	0.979079	3.29e-05	0.000197305	ENSG00000165914	20990	10_Active_enhancer_2	1	1	1	0	1	1	1	0	Bach1|0|-11.96622056942|11|-|9.56975643573001|-2.39646413369
rs13011385	2:181278092-181278526	2	181278239	C	T	0.105263	0.262976	0.999721	0.999721	13.8532	0.252732	6.4e-05	0.350745	15.7388	4.02757	1	1	0.419646	0	0.986707	0.986707	0.000197659	0.000197659	ENSG00000225258	279089	10_Active_enhancer_2	1	0	0	0	1	0	0	1	NA
rs9364466	6:168996687-168998018	6	168996717	A	G	0.210526	0.0475	0.994007	0.994007	16.4522	0.342195	0.021688	0.52346	10.1958	5.23146	7	4	1.77666	0	0.888933	0.825346	4.99e-05	0.000199569	ENSG00000237355	-118128	17_Weak_repressed_polycomb	1	1	0	0	0	0	1	1	XBP-1_1|0|-10.72956846962|16|-|14.52985494664|3.80028647702001
rs6973268	7:29587138-29587530	7	29587321	T	G	0.315789	0.012492	1	1	13.8316	0.277864	0.000178	0.41194	13.1309	3.37109	1	1	0.306499	0	0.991563	0.991563	0.000199944	0.000199944	ENSG00000223813	16148	18_Quiescent/low_signal	0	1	0	0	0	0	0	0	Ets_disc2|0|-11.96612219544|5|+|11.208625995382|-0.757496200058
rs11649479	16:19606843-19607024	16	19606891	G	A	0.315789	1.37722	0.999635	0.999635	15.1217	0.267598	0.000199	0.315514	11.8958	2.09175	2	2	0	0	0.994116	0.994466	0.000100796	0.000201593	ENSG00000221688	1778	6_Weak_transcription	0	0	0	0	0	0	0	0	Bach1|0|-11.96622056942|10|-|9.85068913791|-2.11553143150999
rs11161588	1:85763360-85764251	1	85763861	G	A	0.210526	1.35111	1	1	15.8654	0.361627	0.00072	0.52293	23.6357	5.16428	4	3	10.2703	0	0.974744	0.991776	6.8e-05	0.00020403	ENSG00000142867	-19589	1_Active_TSS	1	0	0	0	1	1	1	0	Sin3Ak-20_disc2|0|-1.77320326026599|1|+|11.556669053246|9.78346579298001
rs7837061	8:97551009-97551253	8	97551053	G	T	0.684211	4.99671	0.995913	0.995913	16.4022	0.297498	5.5e-05	0.398656	10.6	3.3628	2	4	0	0	0.995475	0.994293	5.12e-05	0.000204898	ENSG00000169439	45126	10_Active_enhancer_2	0	0	0	0	0	0	0	0	LBP-1_1|0|-11.703220930536|10|+|12.541904572882|0.838683642345998
rs4312490	2:241821396-241821690	2	241821481	T	C	0.605263	0.996253	0.99978	0.99978	16.3705	0.368528	2.8e-05	0.407603	30.6789	3.46062	4	4	0	0	0.996165	0.995965	5.21e-05	0.000208364	ENSG00000172482	13499	10_Active_enhancer_2	1	1	0	0	1	1	1	1	Gm397|0|-3.908595050928|12|-|11.449702973676|7.541107922748
rs11143170	9:74825545-74825837	9	74825707	T	C	0.289474	0.206997	1	1	13.7509	0.266997	0.000112	0.445367	8.72735	3.11599	1	1	0	0	0.989828	0.989828	0.000208724	0.000208724	ENSG00000235523	-46708	6_Weak_transcription	1	1	0	0	1	0	0	0	Pax-6_1|0|-5.30546379705001|14|+|11.938772778|6.63330898094999
rs1294555	14:91000610-91000846	14	91000816	C	G	0.657895	3.27834	0.973933	0.973933	13.7411	0.302861	0.000266	0.430812	20.6928	2.33677	2	1	0	0	0.953844	0.901556	0.000209811	0.000209811	ENSG00000233208	79035	6_Weak_transcription	0	0	0	0	0	0	0	0	NA
rs110732	6:111679765-111680082	6	111679869	G	T	0.552632	0.033543	0.998621	0.998621	13.7303	0.667339	0.000153	0.524506	26.1836	3.491	1	1	0.083845	0	0.970146	0.970146	0.000211022	0.000211022	ENSG00000229276	3045	6_Weak_transcription	0	0	0	0	0	0	0	0	Cdx2_1|0|0.999429204102|14|+|11.73937045777|12.738799661872
rs55955752	12:9600167-9601528	12	9601104	G	T	0.421053	0.120222	0.883598	0.883598	17.4012	0.664643	0.014595	0.357124	6.58597	6.29502	7	7	9.72066	0	0.727271	0.837532	3.03e-05	0.000211849	ENSG00000214826	657	18_Quiescent/low_signal	1	0	0	0	1	1	0	0	NA
rs9549061	13:40683447-40683878	13	40683677	A	G	0.131579	0.43618	0.996782	0.996782	13.7112	0.723181	9.4e-05	0.639804	14.6116	4.09374	1	1	0	0	0.987942	0.987942	0.000213179	0.000213179	ENSG00000230710	-72500	10_Active_enhancer_2	0	0	0	0	0	1	0	1	HDAC2_disc6|0|1.72409670055001|14|-|9.79736723920001|11.52146393975
rs74637212	16:69999081-69999736	16	69999300	C	A	0.263158	0.655306	0.905679	0.905679	14.9802	0.275227	0.048569	0.265658	11.0866	3.40687	2	2	0	0	0.68924	0.877365	0.000108646	0.000217291	ENSG00000157322	14270	1_Active_TSS	0	0	0	0	1	1	0	0	MAZ|0|-11.966216566509|6|-|12.157542072374|0.191325505865009
rs57948986	3:9396289-9396774	3	9396504	T	C	0.078947	0.139592	0.999638	0.999638	16.2852	0.259692	1.6e-05	0.42845	11.7122	3.88758	4	4	2.11112	0	0.992778	0.983315	5.45e-05	0.000217956	ENSG00000214041	6161	10_Active_enhancer_2	1	0	1	0	0	1	1	0	OTX|0|-11.644298082355|2|-|11.191398972736|-0.452899109618997
rs501626	11:104917777-104918431	11	104918132	T	C	0.157895	0.824653	1	1	14.973	0.309157	5.3e-05	0.362396	19.2154	4.1346	2	2	0	0	0.991809	0.992975	0.000109063	0.000218126	ENSG00000204397	-1726	18_Quiescent/low_signal	1	0	0	0	0	0	0	1	BCL_disc2|0|-11.96613822636|6|+|11.87434298579|-0.0917952405700078
rs75058996	13:64020414-64020897	13	64020629	G	T	0.184211	0.968783	1	1	17.3264	0.363196	0.000923	0.471052	26.5032	4.33214	6	7	0.768128	0	0.990428	0.991365	3.15e-05	0.000220353	ENSG00000227564	-219225	10_Active_enhancer_2	1	0	0	0	1	1	0	0	NA
rs1998699	6:55996321-55996576	6	55996417	C	T	0.631579	2.42347	0.999661	0.999661	14.907	0.320534	6.1e-05	0.445713	17.5067	3.62783	3	2	1.52401	0	0.994127	0.9921	0.000112945	0.000225891	ENSG00000219095	145273	18_Quiescent/low_signal	1	0	0	0	0	0	1	0	Bach2|0|-3.58065948363199|6|+|12.115531326754|8.534871843122
rs28500748	4:41011230-41011982	4	41011718	C	G	0.184211	0.968783	0.99965	0.99965	15.6686	0.711774	2.7e-05	0.518322	18.2687	4.4244	3	3	0.501141	0	0.980692	0.987636	7.55e-05	0.000226405	ENSG00000201736	19058	10_Active_enhancer_2	1	1	0	0	0	0	1	0	Ets_disc2|0|11.96612219544|6|-|-0.130264349610002|11.83585784583
rs4543128	4:128590788-128591219	4	128591002	G	A	0.5	0.052632	0.998214	0.998214	13.5472	0.658054	0.000138	0.470626	20.7881	3.95366	1	1	0	0	0.991078	0.991078	0.000232634	0.000232634	ENSG00000164066	36667	6_Weak_transcription	1	1	0	0	0	0	1	1	Mef2_known4|0|11.64433744584|8|+|-0.170732265489988|11.47360518035
rs2749035	6:52633752-52634605	6	52633933	G	A	0.631579	1.96301	0.982638	0.982638	16.1353	0.39749	0.004185	0.317933	39.6095	5.99493	4	4	0.841254	0	0.934706	0.961751	5.9e-05	0.000235899	ENSG00000244067	-5385	10_Active_enhancer_2	1	1	1	0	0	1	1	0	PRDM1_known1|0|-11.96610736867|8|+|6.70093705687|-5.26517031179998
rs11904347	2:142979950-142980743	2	142980125	T	C	0.394737	0.001437	0.985066	0.985066	15.577	0.608563	1.4e-05	0.580128	19.7804	5.39109	3	3	0	0	0.948899	0.920307	7.92e-05	0.000237633	ENSG00000244125	-84551	18_Quiescent/low_signal	1	1	0	0	0	0	1	1	NA
rs60569709	2:20822584-20822809	2	20822694	C	T	0.394737	3.54395	0.99967	0.99967	13.4918	0.668606	5e-05	0.380962	23.4259	4.11754	2	1	0	0	0.992879	0.992473	0.000239609	0.000239609	ENSG00000233416	-16170	10_Active_enhancer_2	1	1	0	0	0	0	1	0	AP-2_disc2|0|2.50277228364601|8|+|11.290696903938|13.793469187584
rs1837887	8:57949022-57949311	8	57949170	G	A	0.394737	0.001437	0.99989	0.99989	13.4868	0.678441	0.000236	0.535605	24.9359	3.14193	1	1	0	0	0.993833	0.993833	0.000240247	0.000240247	ENSG00000104331	-42595	18_Quiescent/low_signal	1	0	0	0	0	0	0	0	HP1-site-factor|0|11.703223739614|2|+|-0.00729070170397961|11.69593303791
rs72743160	1:220136782-220137027	1	220136960	G	C	0.236842	1.40601	0.997528	0.997528	16.0855	0.298563	4.1e-05	0.569398	10.0268	2.57285	4	4	0.054682	0	0.98928	0.992196	6.05e-05	0.000242189	ENSG00000242096	750	6_Weak_transcription	1	0	0	0	0	0	0	0	p300_disc2|0|-1.18297005597501|15|-|14.007291356026|12.824321300051
rs926866	6:99479929-99480627	6	99480376	G	C	0.868421	0.43618	1	1	16.5033	0.298192	0.00438	0.393028	24.7569	3.93037	6	5	0.16948	0	0.994026	0.988237	4.86e-05	0.00024283	ENSG00000112234	-84080	18_Quiescent/low_signal	0	0	0	0	1	0	0	0	TCF12_disc2|0|-11.966130726342|4|+|12.487098141973|0.520967415630992
rs1992863	3:143405838-143406268	3	143406112	T	G	0.394737	0.85067	1	1	13.4578	0.723494	8.9e-05	0.505284	10.11	3.71877	2	1	0	0	0.99174	0.99134	0.000243991	0.000243991	ENSG00000243457	89698	10_Active_enhancer_2	0	0	0	0	0	0	1	0	Otx2|0|3.61038184262999|6|+|7.57231083963001|11.18269268226
rs736741	6:158489724-158490288	6	158489863	C	T	0.184211	0.294145	1	1	15.5221	0.648549	3.2e-05	0.671519	23.4075	4.45834	3	3	0.500346	0	0.994176	0.992352	8.15e-05	0.000244639	ENSG00000233496	67584	10_Active_enhancer_2	1	0	1	0	0	0	0	1	Maf_disc1|0|11.966205271608|8|+|-5.37650003357199|6.589705238036
rs79819880	11:94666331-94666723	11	94666530	G	C	0.157895	0.667969	0.996065	0.996065	13.4438	0.741878	2.6e-05	0.699137	9.56302	3.74498	2	1	0.362825	0	0.955004	0.98388	0.000245816	0.000245816	ENSG00000150316	40445	18_Quiescent/low_signal	0	0	0	0	0	0	0	0	ERalpha-a_known4|0|5.169379824216|3|-|6.293912892592|11.463292716808
rs868521	13:114758010-114758583	13	114758331	G	A	0.657895	1.5558	0.998133	0.998133	14.7412	0.274701	0.00014	0.256624	9.24206	3.89873	2	2	0	0	0.993103	0.988738	0.000123321	0.000246642	ENSG00000247604	-43168	16_Repressed_polycomb	1	0	0	0	1	1	0	0	NF-Y_disc1|0|-11.966091814366|10|+|11.156160375642|-0.809931438723993
NA	7:93541714-93542018	7	93541824	C	<	0.657895	1.5558	1	1	14.7382	0.198625	0.009577	0.376339	5.30286	2.84891	4	2	0	0	0.575697	0.989969	0.000123516	0.000247032	ENSG00000127920	-9298	17_Weak_repressed_polycomb	0	0	0	0	0	0	0	0	NA
rs3211717	13:113776749-113777752	13	113776949	C	A	0.394737	0.001437	0.99748	0.99748	16.0419	0.36327	0.010597	0.431132	24.5683	4.85811	3	4	0.033045	0	0.99119	0.99356	6.2e-05	0.000247827	ENSG00000126218	-380	10_Active_enhancer_2	1	0	1	0	1	1	0	0	NA
rs2705282	8:138946814-138946931	8	138946847	C	T	0.526316	2.55444	0.998524	0.998524	13.4266	0.713085	0.000312	0.542282	12.8287	2.05985	1	1	0	0	0.994581	0.994581	0.000248085	0.000248085	ENSG00000147724	562251	17_Weak_repressed_polycomb	0	0	0	0	0	0	0	0	Maf_disc1|0|11.966094761964|6|-|-5.31207291112|6.654021850844
rs6801957	3:38767095-38767525	3	38767315	T	C	0.736842	0.655306	1	1	13.3971	0.305555	0.013963	0.361362	13.6429	3.46602	1	1	0	0	0.993576	0.993576	0.000252016	0.000252016	ENSG00000185313	68406	11_Weak_enhancer	0	0	1	0	0	0	0	1	Sox_4|0|-1.22017630835|2|+|10.99925579398|9.77907948563
rs7894911	10:60894379-60894786	10	60894724	A	G	0.289474	0.43618	1	1	15.459	0.243011	0.014386	0.377503	12.8964	3.01354	3	3	0	0	0.970581	0.991209	8.43e-05	0.000252937	ENSG00000226557	3563	6_Weak_transcription	1	0	0	0	0	0	0	0	TEF|0|-11.96606101093|2|-|13.68004905628|1.71398804534999
rs12095801	1:77787657-77788383	1	77788129	G	C	0.184211	0.968783	0.99965	0.99965	15.4439	0.29148	0.00447	0.285768	19.106	4.94304	3	3	0.071316	0	0.98709	0.989563	8.5e-05	0.000254978	ENSG00000233099	27613	10_Active_enhancer_2	1	0	0	0	0	0	0	1	1
rs11778460	8:131034050-131034286	8	131034168	C	G	0.078947	0.139592	1	1	13.3631	0.743893	0.008094	0.583973	20.586	4.01746	1	1	0	0	0.984681	0.984681	0.000256624	0.000256624	ENSG00000153310	-5353	6_Weak_transcription	1	0	0	0	1	0	1	0	ATF3_known3|0|11.966304399039|7|-|-13.257516258921|-1.291211859882
rs2242350	5:68513346-68514223	5	68513599	G	T	0.394737	0.85067	0.973798	0.973798	14.6434	0.553012	8e-06	0.493199	69.6397	6.32537	2	2	1.20248	0	0.955334	0.915333	0.00012989	0.000259781	ENSG00000134056	-228	1_Active_TSS	0	0	0	0	1	1	0	0	NA
rs35237970	6:18142159-18142460	6	18142308	A	G	0.631579	0.172336	0.930052	0.930052	16.3613	0.704834	2.8e-05	0.579018	7.1818	3.22861	5	5	3.48989	0	0.94596	0.895373	5.23e-05	0.00026171	ENSG00000137364	13146	6_Weak_transcription	1	0	0	0	0	0	0	0	HNF4_disc5|0|10.686625851603|4|-|5.241693837442|15.928319689045
rs62368979	5:64778600-64779831	5	64779711	G	T	0.315789	0.902531	0.959976	0.959976	17.2266	0.378085	0.002412	0.372858	14.1394	5.46794	7	8	15.0139	0	0.977469	0.939863	3.32e-05	0.000265407	ENSG00000049192	-853	1_Active_TSS	1	0	0	1	1	1	1	0	NA
rs61999302	2:179314927-179316594	2	179315031	T	C	0.157895	0.667969	1	1	14.5904	0.244273	0.001479	0.324069	12.582	7.09732	5	2	31.2616	0	0.975535	0.968173	0.000133595	0.00026719	ENSG00000180228	1312	1_Active_TSS	1	1	0	0	1	1	1	1	Zfp187|0|-4.77572629792|3|-|11.103380276808|6.327653978888
rs7957261	12:69567135-69567740	12	69567417	C	G	0.710526	0.206997	1	1	15.8984	0.705297	0.003082	0.490199	11.7853	3.87372	4	4	0	0	0.995207	0.994867	6.68e-05	0.000267338	ENSG00000221422	26844	10_Active_enhancer_2	0	0	0	0	1	1	1	1	SZF1-1|0|11.966202584836|5|+|2.54994477052401|14.51614735536
rs4757506	11:17297745-17299036	11	17298277	A	G	0.105263	0.262976	0.984839	0.984839	17.1691	0.415176	0.003153	0.489148	62.0993	6.3329	8	8	2.4375	0	0.988353	0.973706	3.42e-05	0.000273564	ENSG00000070081	-542	1_Active_TSS	1	0	0	1	1	1	0	1	ZNF263_disc1|0|-3.48694650382001|5|+|14.025327640765|10.538381136945
rs9319895	18:71896334-71896624	18	71896469	G	A	0.605263	0.85067	1	1	14.5377	0.342485	0.000197	0.49173	17.6406	2.62248	2	2	0.219362	0	0.993677	0.992412	0.000137381	0.000274761	ENSG00000222340	1592	17_Weak_repressed_polycomb	0	0	0	0	0	0	0	0	GATA_known8|0|-11.966059361088|9|+|13.224529035516|1.258469674428
rs1439346	4:178012827-178013903	4	178013515	C	G	0.157895	0.667969	0.998224	0.998224	14.5322	0.66515	0.002469	0.501639	20.3559	5.36424	3	2	0	0	0.995156	0.989734	0.000137787	0.000275574	ENSG00000243827	-89762	18_Quiescent/low_signal	1	1	0	0	0	0	1	1	STAT_known14|0|1.994349813768|14|-|9.310015632296|11.304365446064
rs12868700	13:45444589-45445091	13	45444847	C	T	0.184211	0.294145	1	1	15.2937	0.309728	2.3e-05	0.481255	9.91044	4.07842	4	3	6.92482	0	0.992992	0.991493	9.2e-05	0.000276063	ENSG00000235097	-60823	10_Active_enhancer_2	0	0	0	1	1	1	0	0	E2A_1|0|-10.5073857263|1|+|13.100159180758|2.59277345445801
rs17463436	4:163711871-163712685	4	163712176	C	T	0.157895	0.824653	1	1	16.6006	0.726867	4.5e-05	0.47351	8.65803	4.29631	5	6	2.56648	0	0.990056	0.993081	4.61e-05	0.000276812	ENSG00000240064	-369194	18_Quiescent/low_signal	1	1	0	0	1	0	1	0	Evi-1_4|0|8.968690354427|11|+|3.833060270163|12.80175062459
rs34590323	21:47929721-47930077	21	47929835	A	G	0.368421	0.172336	1	1	14.5149	0.691008	7.3e-05	0.621981	9.34915	3.87529	2	2	0	0	0.993962	0.990986	0.000139052	0.000278105	ENSG00000202239	-15811	6_Weak_transcription	1	1	0	0	0	1	0	0	SMC3_disc4|0|3.52522724862|2|-|7.33041681822201|10.855644066842
rs61944021	13:27910140-27910701	13	27910473	C	G	0.078947	0.139592	1	1	13.2123	0.695828	9.4e-05	0.560523	39.7961	4.22935	1	1	0	0	0.983003	0.983003	0.000278117	0.000278117	ENSG00000244517	7741	17_Weak_repressed_polycomb	0	0	0	0	0	0	0	0	CDP_1|0|9.382950026073|5|+|-0.91540355231902|8.46754647375398
rs983613	7:52477884-52478089	7	52478038	A	T	0.526316	0.459753	1	1	13.2	0.683694	0.000416	0.503375	20.9975	2.55121	1	1	0	0	0.994427	0.994427	0.000279947	0.000279947	ENSG00000238506	-86299	17_Weak_repressed_polycomb	0	0	0	0	0	0	0	0	NA
rs11687567	2:11838202-11838708	2	11838546	G	C	0.184211	0.294145	0.998254	0.998254	13.1835	0.750061	0.000141	0.532219	8.77151	4.01204	1	1	0	0	0.992679	0.992679	0.00028243	0.00028243	ENSG00000228496	16615	10_Active_enhancer_2	0	0	0	0	1	0	0	0	STAT_known14|0|1.220970265632|15|+|12.482767484696|13.703737750328
rs2274410	13:95860180-95860533	13	95860288	C	A	0.5	0.052632	1	1	14.4496	0.29501	8.3e-05	0.398682	13.2438	2.98639	3	2	0	0	0.992658	0.994362	0.000143958	0.000287915	ENSG00000238463	-2419	17_Weak_repressed_polycomb	0	0	0	0	1	0	0	0	Irf_known3|0|-3.452915266416|5|-|9.990005422526|6.53709015611
rs13169624	5:108071412-108071995	5	108071916	G	T	0.236842	0.006973	1	1	14.4467	0.372728	4.7e-05	0.516088	23.5355	4.37881	2	2	6.88682	0	0.995266	0.993807	0.00014418	0.00028836	ENSG00000245338	10005	10_Active_enhancer_2	0	1	0	0	1	1	1	1	NA
rs1754187	7:76074918-76075277	7	76075196	A	G	0.421053	0.120222	0.806407	0.806407	14.4291	0.260177	0.009051	0.286488	8.68814	3.44573	2	2	0	0	0.709221	0.584163	0.000145539	0.000291079	ENSG00000091073	-16055	10_Active_enhancer_2	1	0	1	0	1	1	1	1	NA
rs12906184	15:86127333-86127627	15	86127408	A	G	0.657895	0.051986	0.973798	0.973798	14.4236	0.323803	3.8e-05	0.526995	15.1683	3.66722	3	2	0.005699	0	0.936567	0.89666	0.000145962	0.000291923	ENSG00000202081	67526	1_Active_TSS	0	0	0	0	0	0	0	0	NA
rs17162816	7:10279157-10279990	7	10279486	T	C	0.236842	0.006973	1	1	13.0603	0.649467	7.6e-05	0.66085	25.9554	4.3683	1	1	0	0	0.994141	0.994141	0.000301628	0.000301628	ENSG00000212422	16732	18_Quiescent/low_signal	1	0	0	0	0	0	0	1	NA
rs1668868	1:205239990-205240341	1	205240141	G	T	0.342105	0.626168	0.97742	0.97742	15.1056	0.669464	0.00171	0.460818	14.6561	4.13579	5	3	0	0	0.967217	0.91485	0.000101662	0.000304987	ENSG00000246368	-31406	10_Active_enhancer_2	1	0	0	0	0	0	0	0	Sin3Ak-20_disc2|0|11.966117535072|8|+|0.374795675743997|12.340913210816
rs12692846	2:167634578-167634784	2	167634642	T	A	0.447368	0.554724	0.999681	0.999681	13.0099	0.710938	0.000508	0.617361	17.8792	2.33741	1	1	0	0	0.992611	0.992611	0.000309843	0.000309843	ENSG00000163092	-110420	18_Quiescent/low_signal	0	0	0	0	0	0	0	0	BAF155_disc1|0|11.96611411737|6|-|-0.0834129166100013|11.88270120076
rs79439126	14:69931629-69931788	14	69931743	T	C	0.157895	0.824653	0.999604	0.999604	12.9991	0.776933	0.000174	0.602579	9.80051	3.04049	1	1	0	0	0.990161	0.990161	0.000311642	0.000311642	ENSG00000175985	-19938	6_Weak_transcription	0	0	0	0	0	0	0	0	NF-kappaB_disc2|0|10.002852717669|8|+|2.43495163680601|12.437804354475
rs75874634	2:53742872-53743536	2	53743227	T	C	0.078947	0.139592	0.998917	0.998917	16.3757	0.377025	0.000499	0.562453	29.535	5.41053	6	6	1.17264	0	0.991776	0.98475	5.19e-05	0.000311675	ENSG00000223897	-29454	10_Active_enhancer_2	1	1	0	1	1	1	1	1	Pou3f4|0|-5.700051449792|12|+|11.082413439954|5.382361990162
rs268759	5:33309098-33309529	5	33309373	T	C	0.184211	0.294145	0.999825	0.999825	12.9861	0.280808	7.5e-05	0.384302	12.3436	3.60866	1	1	0	0	0.992643	0.992643	0.00031382	0.00031382	ENSG00000239678	-31039	10_Active_enhancer_2	1	0	0	0	1	1	0	0	Cdx2_1|0|-11.966142631191|6|+|12.061365220951|0.0952225897599988
rs72776479	10:834928-835790	10	835542	C	T	0.157895	0.667969	0.995729	0.995729	16.0126	0.251914	4.1e-05	0.328979	12.8984	4.28837	4	5	3.61388	0	0.983607	0.971294	6.29e-05	0.000314604	ENSG00000245536	-20600	10_Active_enhancer_2	0	0	0	1	1	1	0	0	NA
rs62506014	8:62671852-62673123	8	62672875	A	G	0.289474	0.43618	0.974825	0.974825	16.3525	0.366634	0.00224	0.372447	29.5077	5.00234	9	6	11.473	0	0.945221	0.947038	5.26e-05	0.000315519	ENSG00000198363	-44653	18_Quiescent/low_signal	1	1	1	0	0	0	1	0	GR_disc5|0|-11.966096697744|8|+|12.264981781376|0.298885083632001
rs17291151	6:143973800-143974513	6	143974083	C	G	0.236842	1.82996	0.999709	0.999709	15.0269	0.392123	0.000986	0.490984	41.4649	5.35422	4	3	1.93723	0	0.992416	0.992017	0.00010599	0.00031797	ENSG00000235740	-90632	10_Active_enhancer_2	0	1	0	0	1	1	1	0	STAT_known3|0|-5.521611073902|6|+|9.307615|3.786003926098
rs10941174	5:34466520-34467454	5	34466613	T	C	0.368421	2.42347	0.9964	0.9964	17.4873	0.566049	0.010605	0.495296	13.2117	5.58256	13	11	0	0	0.986451	0.99025	2.89e-05	0.000318155	ENSG00000222261	59886	1_Active_TSS	1	1	0	0	1	1	1	0	NF-Y_known2|0|11.966256102566|4|+|-5.679364523237|6.28689157932901
rs6673674	1:222019107-222020003	1	222019354	T	C	0.5	0.052632	1	1	14.2592	0.385964	2.4e-05	0.4154	40.7258	5.21315	2	2	1.10336	0	0.995937	0.996203	0.000159278	0.000318556	ENSG00000227925	-5099	6_Weak_transcription	1	1	1	1	1	1	1	0	1
rs8003504	14:32672044-32673377	14	32672554	C	G	0.236842	0.006973	1	1	17.801	0.442219	0.000203	0.482582	40.9675	6.17592	13	13	1.6158	0	0.994936	0.994365	2.45e-05	0.000318837	ENSG00000202337	431	1_Active_TSS	1	0	0	0	1	1	0	0	NERF1a|0|-10.966524024029|12|-|4.34581771792503|-6.62070630610398
rs34590422	2:192127238-192128138	2	192127400	C	A	0.315789	1.37722	0.959931	0.959931	15.0101	0.615044	1.4e-05	0.72399	26.05	4.87627	4	3	4.21656	0	0.897842	0.960033	0.000106935	0.000320805	ENSG00000227542	-16340	10_Active_enhancer_2	1	1	0	0	1	1	1	1	PRDM1_disc2|0|11.966170482085|3|-|0.148961202875|12.11513168496
rs745378	14:96572468-96572849	14	96572622	G	A	0.105263	0.262976	0.990416	0.990416	12.9434	0.257	5.4e-05	0.359941	18.977	4.1051	1	1	0.125957	0	0.974745	0.974745	0.000321053	0.000321053	ENSG00000227051	15701	10_Active_enhancer_2	0	0	0	0	1	1	0	0	Foxp3|0|-11.966215463925|13|-|5.856544043426|-6.10967142049901
rs66492110	6:122556922-122557477	6	122557308	T	TA	0.210526	0.0475	0.997477	0.997477	12.943	0.734457	0.000261	0.509175	13.4221	3.31768	1	1	0	0	0.94614	0.989705	0.000321121	0.000321121	ENSG00000199932	24127	18_Quiescent/low_signal	0	0	0	0	0	0	0	0	Mef2_known2|0|28.70625285606|5|+|-13.123930861|15.58232199506
rs9484892	6:100737242-100737565	6	100737354	G	A	0.289474	0.206997	1	1	15.0034	0.312612	0.002084	0.367449	17.9304	3.61564	3	3	0	0	0.970225	0.995461	0.00010732	0.000321961	ENSG00000216378	112156	6_Weak_transcription	1	0	0	0	0	0	0	1	SEF-1|0|-11.966110121376|6|-|-9.787829600816|-21.753939722192
rs112416087	20:47113385-47113755	20	47113577	A	G	0.078947	0.139592	0.98716	0.98716	12.9347	0.242735	4.9e-05	0.418073	15.7056	3.66771	1	1	0	0	0.97276	0.97276	0.000322548	0.000322548	ENSG00000238452	9170	10_Active_enhancer_2	1	1	0	1	1	1	1	0	YY1_known6|0|-9.820331323602|9|-|11.841029904603|2.020698581001
rs1148994	12:72021554-72022235	12	72021949	A	G	0.631579	1.96301	1	1	15.5316	0.668879	0.006798	0.398535	12.7184	3.66163	5	4	0	0	0.993743	0.996423	8.11e-05	0.000324551	ENSG00000212461	-11582	5_Strong_transcription	0	0	0	0	0	0	0	0	Hlxb9|0|3.81684329815199|5|-|11.845058447148|15.6619017453
rs11759320	6:148200273-148201037	6	148200924	C	A	0.289474	2.46609	1	1	15.951	0.353896	0.004997	0.53717	18.0633	3.89949	5	5	0.175135	0	0.994926	0.99551	6.5e-05	0.000325009	ENSG00000226249	-135813	10_Active_enhancer_2	1	0	0	0	1	1	0	0	NA
rs7817515	8:59447349-59447763	8	59447578	T	G	0.394737	0.996253	1	1	12.8908	0.710575	0.016355	0.548941	7.37577	3.22349	1	1	0	0	0.991911	0.991911	0.000330209	0.000330209	ENSG00000137575	-18380	18_Quiescent/low_signal	0	0	0	1	1	0	0	0	Rad21_disc4|0|11.79914869192|8|+|0.391628345559994|12.19077703748
rs6888170	5:1641615-1641940	5	1641826	C	T	0.210526	2.55444	0.996217	0.996217	14.9469	0.323386	0.001866	0.405499	23.5339	3.78376	3	3	1.79808	0	0.976908	0.97672	0.000110582	0.000331746	ENSG00000188002	-7516	17_Weak_repressed_polycomb	1	0	0	1	1	0	0	0	BCL_disc7|0|-11.853742825923|5|+|15.149890694147|3.29614786822398
rs6775186	3:22597053-22597607	3	22597434	T	A	0.421053	2.35783	0.999676	0.999676	15.4832	0.640986	0.001987	0.60123	17.5771	4.06942	5	4	3.31457	0	0.978875	0.996823	8.32e-05	0.000332974	ENSG00000234723	115149	18_Quiescent/low_signal	1	1	0	0	1	0	0	0	NA
rs6549121	3:68451308-68451899	3	68451311	G	C	0.421053	0.120222	0.999784	0.999784	14.1664	0.637742	3.3e-05	0.536757	27.7061	4.01214	4	2	0	0	0.993705	0.994669	0.000167331	0.000334662	ENSG00000240568	209759	18_Quiescent/low_signal	0	0	1	0	1	0	0	0	Ets_known4|0|0.000634530576007819|17|-|14.956961438244|14.95759596882
rs608972	11:94335626-94336593	11	94336130	T	C	0.368421	0.325822	1	1	15.8955	0.736534	1.7e-05	0.603709	8.74284	5.29213	4	5	-0.000256	0	0.971276	0.995023	6.69e-05	0.000334697	ENSG00000134627	35151	10_Active_enhancer_2	0	0	0	1	1	0	0	1	Arnt_2|0|11.96614998936|10|+|-0.0289096993799944|11.93724028998
rs12214837	6:78078399-78079015	6	78078858	C	G	0.052632	0.058642	1	1	15.8843	0.289758	0.003548	0.410097	8.63953	4.39731	4	5	5.9802	0	0.992912	0.975589	6.73e-05	0.000336671	ENSG00000135312	94782	18_Quiescent/low_signal	0	0	0	0	1	0	0	0	NA
rs6782004	3:134684654-134685146	3	134684918	C	T	0.210526	1.35111	1	1	14.9132	0.271906	0.005085	0.408687	17.0112	3.78064	3	3	3.941	0	0.978141	0.988778	0.000112573	0.000337718	ENSG00000201413	-182257	10_Active_enhancer_2	1	0	1	0	1	1	0	1	NA
rs3802643	10:80783005-80783173	10	80783166	T	C	0.5	1.31579	1	1	12.8343	0.682366	0.000241	0.60578	14.3309	2.94479	1	1	-2.6e-05	0	0.995852	0.995852	0.00034033	0.00034033	ENSG00000229569	-19445	10_Active_enhancer_2	0	0	0	0	0	0	0	0	NA
rs3811506	1:104615598-104616449	1	104615959	A	G	0.210526	1.35111	1	1	14.8922	0.66218	0.006518	0.590969	28.1222	3.80492	5	3	0.327513	0	0.957525	0.989932	0.000113835	0.000341504	ENSG00000243500	-35	17_Weak_repressed_polycomb	0	0	0	0	0	0	0	0	1
rs2306626	1:38156002-38156434	1	38156343	G	A	0.342105	0.051986	0.986316	0.986316	14.8848	0.416299	1.8e-05	0.485746	30.9475	4.99223	3	3	0.797323	0	0.984329	0.98185	0.000114278	0.000342833	ENSG00000116922	1912	1_Active_TSS	1	0	0	0	1	1	1	0	LUN-1|0|-11.966199552645|16|+|-11.14716861307|-23.113368165715
rs62517177	12:103310747-103311652	12	103311055	G	A	0.105263	0.262976	1	1	16.9623	0.339008	0.001487	0.456629	29.934	5.0292	7	9	2.2277	0	0.972534	0.987773	3.81e-05	0.000343172	ENSG00000171759	634	10_Active_enhancer_2	0	0	0	1	1	1	0	1	RFX5_disc1|0|-1.55890022701799|1|+|11.340904128166|9.782003901148
rs715769	9:4921391-4921989	9	4921639	G	A	0.315789	0.902531	1	1	14.8826	0.327906	4.1e-05	0.551991	9.35005	3.88205	3	3	10.7437	0	0.991712	0.992233	0.000114414	0.000343243	ENSG00000220937	24511	18_Quiescent/low_signal	1	1	0	0	0	1	0	1	INSM1|0|-11.966198569466|9|+|12.898498169983|0.932299600516998
rs77645462	15:40268545-40269259	15	40269079	G	T	0.131579	0.43618	0.99977	0.99977	15.4204	0.252414	2.4e-05	0.635763	17.6615	4.83688	1	4	0	0	0.994344	0.982429	8.61e-05	0.000344217	ENSG00000238564	25637	1_Active_TSS	1	0	0	1	1	1	0	0	CTCFL_disc1|0|-3.78367466208|1|+|15.783064635108|11.999389973028
rs196579	7:36312566-36313028	7	36312929	A	G	0.184211	0.968783	1	1	12.8088	0.687243	7e-05	0.565229	26.8338	3.88343	2	1	0	0	0.981871	0.984488	0.000344995	0.000344995	ENSG00000244954	26768	9_Active_enhancer_1	1	0	0	0	1	1	0	0	NA
rs829896	12:98859759-98860143	12	98859842	C	T	0.263158	0.655306	0.943161	0.943161	14.1035	0.722508	0.007898	0.593386	7.98709	3.71769	2	2	0	0	0.894582	0.940305	0.000173017	0.000346035	ENSG00000227825	-9862	18_Quiescent/low_signal	0	1	0	0	0	0	0	0	AP-1_known1|0|11.966172379902|5|-|-0.221284256453998|11.744888123448
rs6744286	2:114040644-114040982	2	114040823	G	A	0.526316	1.35111	0.924637	0.924637	14.1032	0.638851	0.000148	0.43944	18.82	3.47768	2	2	1.17166	0	0.863591	0.7169	0.000173049	0.000346097	ENSG00000125618	-4146	10_Active_enhancer_2	0	0	0	1	1	0	0	0	NA
rs1126511	6:33048125-33048649	6	33048466	G	T	0.289474	0.206997	1	1	18.8874	0.662525	0.003093	0.393899	4.28141	3.51888	23	25	22.7791	0	0.977198	0.959899	1.39e-05	0.000346664	ENSG00000231389	427	14_Bivalent/poised_TSS	0	0	0	0	1	1	0	0	ATF3_known8|0|11.64429019476|11|-|0.983526352520016|12.62781654728
rs145088356	8:10532353-10533022	8	10532597	AGCCAG	A	0.394737	0.996253	0.918818	0.918818	14.096	0.257248	0.000141	0.609752	11.7456	4.22329	1	2	0	0	0.972481	0.860854	0.000173709	0.000347418	ENSG00000171060	2205	10_Active_enhancer_2	1	0	0	0	0	0	0	0	SZF1-1|0|-29.269363114172|-1|-|9.636486554588|-19.632876559584
rs3750259	8:49647533-49648544	8	49647910	C	A	0.473684	0.058642	0.99559	0.99559	12.7946	0.359806	8.8e-05	0.48714	30.8419	4.53511	1	1	0	0	0.992298	0.992298	0.00034762	0.00034762	ENSG00000034239	337	2_Weak_TSS	0	0	0	0	1	0	0	0	ATF3_disc4|0|-9.12511857028801|2|-|10.676201986078|1.55108341579
rs2442683	11:107728782-107730077	11	107729615	G	T	0.368421	0.172336	0.999887	0.999887	16.1577	0.446156	0.001213	0.506589	60.7484	6.2244	5	6	0	0	0.996121	0.99608	5.83e-05	0.000349686	ENSG00000240652	-50365	1_Active_TSS	0	0	0	0	1	1	1	0	NA
rs7561278	2:48954825-48955154	2	48954905	T	C	0.315789	0.012492	0.997611	0.997611	14.0747	0.669584	5e-05	0.637115	20.4371	3.0103	3	2	0.013284	0	0.976989	0.987227	0.000175693	0.000351387	ENSG00000138039	28055	17_Weak_repressed_polycomb	0	0	0	0	0	0	0	0	RXRA_disc2|0|5.6811777577|8|+|5.61073270608399|11.291910463784
rs872778	9:37806123-37806868	9	37806245	T	C	0.184211	0.294145	1	1	15.3795	0.290338	0.004664	0.353718	14.6692	4.20886	5	4	8.59903	0	0.966049	0.991815	8.79e-05	0.000351752	ENSG00000107371	-4689	6_Weak_transcription	1	0	0	1	1	1	1	0	NA
rs12916466	15:65127928-65128346	15	65128177	C	T	0.552632	0.033543	0.960168	0.960168	15.7997	0.402216	0.001185	0.501806	22.326	4.68595	4	5	4.28159	0	0.949528	0.936526	7.04e-05	0.000352068	ENSG00000241839	-6161	10_Active_enhancer_2	0	0	0	1	1	0	0	0	NA
rs10756018	9:10254439-10254874	9	10254669	T	G	0.578947	0.120222	0.990014	0.990014	15.3745	0.35525	5.4e-05	0.453594	24.0987	3.40644	4	4	0	0	0.98992	0.980395	8.82e-05	0.000352682	ENSG00000234360	-277707	18_Quiescent/low_signal	1	0	0	0	0	0	0	0	NA
rs2236420	13:75900501-75901068	13	75900892	C	T	0.710526	0.206997	0.998087	0.998087	12.7302	0.33558	9.8e-05	0.469684	17.0085	3.79726	2	1	0	0	0.989488	0.993712	0.000359803	0.000359803	ENSG00000225203	-49147	11_Weak_enhancer	0	0	1	0	1	1	0	0	NA
rs13200858	6:49635803-49636204	6	49636129	A	G	0.263158	0.139592	1	1	15.7508	0.307949	3.8e-05	0.400442	18.8672	2.91834	5	5	2.42068	0	0.995501	0.992316	7.23e-05	0.000361285	ENSG00000112077	-31216	18_Quiescent/low_signal	1	0	0	0	0	0	0	0	Foxd3|0|-10.996854929616|3|+|11.451842094648|0.454987165032009
rs9567024	13:43294437-43295181	13	43294557	A	T	0.078947	0.139592	0.997111	0.997111	16.8543	0.289264	1.3e-05	0.494145	24.2034	4.47352	8	9	0.583848	0	0.993043	0.978172	4.04e-05	0.000363259	ENSG00000179813	-61315	10_Active_enhancer_2	1	1	0	0	0	0	1	0	NA
rs2816825	10:52753238-52754246	10	52753916	G	T	0.842105	0.824653	1	1	15.737	0.653257	0.00096	0.513623	25.9422	4.6229	5	5	0	0	0.989556	0.993534	7.28e-05	0.000363933	ENSG00000185532	2119	1_Active_TSS	1	0	0	0	0	0	1	0	HP1-site-factor|0|11.703223739614|3|+|4.31079001865601|16.01401375827
rs2780835	9:20620426-20620959	9	20620596	C	T	0.210526	1.35111	0.988176	0.988176	13.9709	0.376136	0.000825	0.512979	32.0518	4.78982	5	2	8.02079	0	0.989943	0.975507	0.000185662	0.000371325	ENSG00000171843	2116	1_Active_TSS	0	0	0	0	1	1	0	0	NA
rs7239147	18:77225438-77225937	18	77225912	C	T	0.105263	0.262976	1	1	13.9633	0.738635	0.015334	0.529902	17.4777	3.47293	3	2	0	0	0.986223	0.98733	0.000186417	0.000372835	ENSG00000131196	69665	17_Weak_repressed_polycomb	0	0	0	0	0	0	0	0	Roaz_1|0|11.96617970008|12|+|-14.68590087039|-2.71972117031001
rs68090074	14:52381165-52381507	14	52381395	G	A	0.315789	1.37722	0.990935	0.990935	15.2532	0.327136	0.01119	0.499956	15.8766	3.05545	4	4	2.87777	0	0.92899	0.983237	9.4e-05	0.00037606	ENSG00000186469	54114	6_Weak_transcription	0	0	0	0	0	0	0	0	AIRE_1|0|-10.597678555504|19|-|11.84656908372|1.24889052821599
rs67436896	5:108441274-108442125	5	108441853	G	A	0.394737	8.51803	1	1	14.7103	0.597765	1.4e-05	0.552337	34.4205	5.39515	4	3	1.30853	0	0.992762	0.997492	0.000125362	0.000376086	ENSG00000176857	-53116	10_Active_enhancer_2	1	1	0	0	1	1	1	1	TLX1::NFIC|0|11.9662088373|2|-|-5.19704261532598|6.769166221974
rs7693992	4:7464240-7464514	4	7464294	C	T	0.315789	1.37722	0.991265	0.991265	14.7098	0.668304	4e-05	0.550322	15.8526	3.43282	3	3	0	0	0.98766	0.988598	0.000125394	0.000376182	ENSG00000178597	-27540	17_Weak_repressed_polycomb	0	0	0	1	0	0	0	0	Bach1|0|11.96610935299|5|+|0.0085911650599968|11.97470051805
rs3729626	7:90417364-90417679	7	90417661	T	C	0.368421	0.172336	0.997632	0.997632	15.2474	0.648897	4.4e-05	0.549434	16.1382	3.19009	5	4	0.086383	0	0.990919	0.993317	9.43e-05	0.000377217	ENSG00000223584	156143	6_Weak_transcription	0	0	0	0	0	0	0	0	NA
rs9266382	6:31334614-31335098	6	31334877	A	C	0.210526	1.35111	1	1	17.3289	0.40906	0.002692	0.502313	30.7186	4.21228	15	12	5.38915	0	0.986914	0.874599	3.14e-05	0.000377233	ENSG00000228432	61	10_Active_enhancer_2	0	0	0	1	1	0	0	0	ATF3_known3|0|-11.229334581969|1|+|-9.615612896724|-20.844947478693
rs1414937	13:40780203-40781096	13	40780619	T	C	0.131579	0.43618	1	1	12.6371	0.325995	4.4e-05	0.436584	31.5839	4.28905	2	1	0	0	0.981498	0.989651	0.000378164	0.000378164	ENSG00000207458	-20762	10_Active_enhancer_2	0	0	1	0	1	1	0	0	Foxa_disc2|0|-11.966142952764|1|-|6.05045892946401|-5.9156840233
rs11694824	2:106886048-106886885	2	106886684	A	G	0.447368	0.554724	1	1	16.5519	0.652528	0.001202	0.481443	15.1678	5.24563	8	8	-189.286	0	0.993219	0.991391	4.73e-05	0.000378702	ENSG00000224061	-15875	1_Active_TSS	1	0	0	0	1	1	1	1	AP-1_disc10|0|11.067479351678|7|-|0.959581648322001|12.027061
rs4768587	12:39538814-39539692	12	39539254	C	T	0.710526	0.206997	0.984744	0.984744	14.6863	0.674482	7.4e-05	0.519299	23.3609	4.44269	2	3	0	0	0.992236	0.981453	0.000126965	0.000380895	ENSG00000139117	-237632	1_Active_TSS	0	0	0	1	1	0	0	0	NA
rs7381546	6:119262024-119262192	6	119262082	G	A	0.526316	0.459753	0.99842	0.99842	13.9206	0.687023	0.003088	0.61117	14.6025	2.66221	3	2	0	0	0.965063	0.995247	0.000190701	0.000381402	ENSG00000111877	-5721	18_Quiescent/low_signal	0	0	0	0	0	0	0	0	Mef2_known2|0|11.92761006502|10|+|0.843065205919984|12.77067527094
rs4669294	2:8723651-8724336	2	8723673	G	A	0.131579	0.43618	0.99977	0.99977	14.6809	0.335823	0.002557	0.446937	23.6028	4.96011	5	3	2.47843	0	0.941505	0.986131	0.000127333	0.000382	ENSG00000236008	271	10_Active_enhancer_2	0	0	0	0	1	1	0	0	NA
rs745023	5:172215936-172216697	5	172216309	C	T	0.342105	3.27834	1	1	15.221	0.376111	0.000133	0.485336	30.2497	3.65812	4	4	2.68738	0	0.957928	0.919873	9.56e-05	0.00038254	ENSG00000206741	-8839	10_Active_enhancer_2	0	0	0	0	0	0	0	0	E2F_disc8|0|-9.91048556385999|3|-|11.85843647564|1.94795091178
rs11205653	1:39582579-39583119	1	39582767	T	G	0.421053	0.353306	0.972006	0.972006	14.6542	0.295075	0.01832	0.284898	9.01885	3.6078	3	3	0.228118	0	0.969699	0.95218	0.000129148	0.000387444	ENSG00000206654	4136	10_Active_enhancer_2	1	0	0	0	0	1	0	0	1
rs35246927	4:167229933-167231039	4	167230871	A	G	0.5	0.473684	1	1	15.1925	0.650773	0.002224	0.421137	10.1587	4.58186	6	4	3.03847	0	0.992229	0.9935	9.71e-05	0.000388359	ENSG00000206711	4253	18_Quiescent/low_signal	1	1	0	0	0	0	0	0	STAT_known2|0|11.697399905984|6|-|-2.185520905984|9.511879
rs4278135	8:132960539-132961365	8	132960843	T	C	0.5	0.052632	1	1	15.5906	0.656816	0.002867	0.478381	7.12542	4.04363	6	5	0.03585	0	0.990961	0.995979	7.86e-05	0.000393213	ENSG00000246342	-42317	6_Weak_transcription	1	0	0	0	0	0	1	0	NA
rs78291738	7:103507299-103507924	7	103507649	A	G	0.052632	0.058642	0.96634	0.96634	16.2201	0.230061	0.001627	0.56312	8.55944	4.00625	10	7	3.3811	0	0.976077	0.94204	5.64e-05	0.000394753	ENSG00000189056	122664	18_Quiescent/low_signal	1	1	0	0	0	0	0	1	PLZF|0|-11.96617887032|14|+|5.338655375234|-6.627523495086
rs1929420	9:112989750-112990102	9	112989929	A	T	0.552632	0.033543	0.998946	0.998946	14.6107	0.294498	5.5e-05	0.527755	13.3269	3.28576	3	3	0.504762	0	0.954079	0.994144	0.00013216	0.000396479	ENSG00000188959	-19281	6_Weak_transcription	1	1	1	0	0	0	1	0	Bbx|0|-4.66366797185199|9|-|11.664387328672|7.00071935682001
rs2224490	9:4192525-4192741	9	4192642	T	C	0.342105	0.051986	0.998949	0.998949	14.5845	0.697602	0.000104	0.566343	7.96499	2.61192	3	3	0	0	0.973447	0.992248	0.000134016	0.000402047	ENSG00000228322	-106866	6_Weak_transcription	0	0	0	0	0	0	0	0	HIF1|0|11.966199992152|7|-|0.0899620308399989|12.056162022992
rs11575939	21:40823380-40823937	21	40823902	C	G	0.263158	0.655306	0.999729	0.999729	14.5823	0.687422	6.6e-05	0.440471	11.0294	4.15171	4	3	0	0	0.961397	0.99501	0.00013417	0.000402511	ENSG00000185437	5598	10_Active_enhancer_2	0	0	0	0	1	1	0	0	AP-2_known5|0|11.966195208687|4|+|-3.23294611186401|8.733249096823
rs112752776	1:120217526-120218784	1	120217618	G	G	0.763158	6.02708	0.999854	0.999854	16.1817	0.342505	2.8e-05	0.382394	16.2222	4.76108	5	7	8.3501	0	0.99354	0.992744	5.75e-05	0.000402824	ENSG00000092621	15104	6_Weak_transcription	1	0	0	1	1	0	1	0	1
rs17723163	8:89258292-89258687	8	89258397	T	C	0.105263	0.262976	0.999721	0.999721	12.5047	0.691362	2.9e-05	0.586027	16.5211	3.84195	3	1	1.37139	0	0.974985	0.987811	0.000405932	0.000405932	ENSG00000156103	81425	6_Weak_transcription	1	0	0	0	0	0	0	0	NF-E2_disc1|0|11.85765076191|7|+|2.30591438164001|14.16356514355
rs1009188	1:197256919-197257442	1	197257090	T	C	0.263158	0.139592	1	1	12.4931	0.314746	8.4e-05	0.361164	17.0868	4.13071	1	1	0.003937	0	0.993514	0.993514	0.000408469	0.000408469	ENSG00000134376	19512	10_Active_enhancer_2	1	0	0	0	0	0	0	0	Ik-2_2|0|-3.315718098159|4|-|11.610776451125|8.295058352966
rs3924235	1:25895123-25895817	1	25895526	G	A	0.394737	0.85067	0.999232	0.999232	15.5153	0.370472	2.3e-05	0.530553	23.7352	4.47421	5	5	4.21775	0	0.990337	0.994026	8.18e-05	0.000409199	ENSG00000225643	-12847	10_Active_enhancer_2	0	0	0	0	0	1	0	0	INSM1|0|-0.262816677336019|12|+|11.898935374482|11.636118697146
rs6701018	1:248100285-248100862	1	248100333	G	A	0.368421	1.96301	0.998985	0.998985	14.5367	0.331598	0.003872	0.452536	6.39572	4.37507	8	3	2.76684	0	0.868704	0.99554	0.000137453	0.000412358	ENSG00000226191	530	17_Weak_repressed_polycomb	0	0	0	1	1	0	0	0	CTCF_disc4|0|-11.96621667973|11|-|13.96864730436|2.00243062463001
rs70949306	2:120435453-120437049	2	120436268	GGT	G	0.657895	0.051986	0.911807	0.911807	16.136	0.573469	0.001076	0.535963	44.9864	6.01735	7	7	8.92421	0	0.897918	0.842059	5.9e-05	0.00041266	ENSG00000144120	-1291	6_Weak_transcription	1	1	0	0	1	1	1	0	NA
rs4530855	6:43859974-43860367	6	43860096	T	G	0.263158	0.655306	1	1	13.7552	0.658893	4.5e-05	0.527012	19.245	3.75339	3	2	0	0	0.990445	0.995341	0.000208242	0.000416483	ENSG00000223469	-39904	10_Active_enhancer_2	0	0	0	0	0	1	1	0	EBF_known1|0|11.78175752|9|+|0.0670566200000025|11.84881414
rs17839005	4:113033952-113035005	4	113034707	T	A	0.052632	0.058642	1	1	16.0991	0.321006	1.4e-05	0.522728	21.2967	4.66712	8	7	9.50691	0	0.922716	0.614995	6.01e-05	0.000420779	ENSG00000240459	4107	10_Active_enhancer_2	1	0	0	0	0	0	1	1	TCF12_known1|0|-11.966139153432|2|-|2.551760846568|-9.41437830686401
rs75050499	5:179740576-179741314	5	179740640	C	T	0.315789	0.902531	0.995086	0.995086	15.0325	0.757374	0.007095	0.599574	5.55964	4.44129	4	4	1.50831	0	0.977575	0.981873	0.000105678	0.000422712	ENSG00000050748	-21505	17_Weak_repressed_polycomb	0	1	0	0	1	1	0	0	Foxp1|0|5.74500550086|1|-|-21.57658034934|-15.83157484848
rs3833712	9:74920030-74920517	9	74920300	T	T	0.394737	0.996253	0.997718	0.997718	13.7216	0.678514	7.9e-05	0.524066	10.7359	4.66789	2	2	0	0	0.925214	0.991793	0.000212002	0.000424004	ENSG00000225434	-316	10_Active_enhancer_2	0	0	0	0	1	1	0	1	NA
rs12519134	5:151656928-151657379	5	151657097	T	A	0.263158	0.139592	0.997716	0.997716	13.669	0.658985	5.1e-05	0.562917	22.0175	3.34791	3	2	2.15473	0	0.962284	0.988386	0.000218024	0.000436047	ENSG00000132911	127912	18_Quiescent/low_signal	0	0	0	0	0	0	0	0	FXR_3|0|11.96622501234|10|+|-7.15286699253501|4.81335801980498
rs9645906	13:106808746-106809148	13	106808803	C	T	0.578947	0.353306	1	1	14.4249	0.328205	8.3e-05	0.434243	9.12066	3.23258	3	3	6.69273	0	0.993439	0.993482	0.000145865	0.000437594	ENSG00000222682	-907	17_Weak_repressed_polycomb	0	0	0	0	0	0	0	0	TCF11::MafG|0|-11.74385950514|10|+|13.432151777431|1.68829227229101
rs62524294	8:96814136-96814424	8	96814226	C	T	0.105263	0.262976	1	1	14.3933	0.689374	3.8e-05	0.559889	10.2192	4.03692	3	3	2.74695	0	0.995093	0.987444	0.000148327	0.00044498	ENSG00000223297	-122993	18_Quiescent/low_signal	0	0	0	0	0	0	0	0	AP-1_known3|0|11.17945654242|2|+|-0.348288916899996|10.83116762552
rs10083274	13:93112652-93113301	13	93112987	A	G	0.184211	0.968783	1	1	14.3933	0.341496	6.9e-05	0.489475	23.3127	3.80571	2	3	11.2932	0	0.977093	0.990114	0.00014833	0.000444989	ENSG00000236240	-24208	10_Active_enhancer_2	0	0	0	0	0	0	0	0	AP-1_disc8|0|-11.966063228985|6|+|6.422465710108|-5.54359751887701
rs10454453	1:66672397-66672697	1	66672532	C	A	0.473684	2.55444	0.999789	0.999789	12.3251	0.620931	0.020643	0.667581	26.7748	3.83904	1	1	0	0	0.99564	0.99564	0.000446897	0.000446897	ENSG00000223152	-112168	10_Active_enhancer_2	1	0	0	0	0	1	0	0	NA
rs10973624	9:37964059-37964837	9	37964730	T	C	0.473684	0.459753	0.999789	0.999789	12.3137	0.394672	9.8e-05	0.329647	37.8429	5.09257	1	1	0.239498	0	0.994653	0.994653	0.000449647	0.000449647	ENSG00000122696	-59709	10_Active_enhancer_2	1	0	0	0	1	1	1	0	Myc_disc4|0|-11.600642745384|7|-|12.890755408168|1.290112662784
rs2236001	21:15645828-15646623	21	15646405	C	A	0.105263	3.6981	0.996951	0.996951	15.3366	0.740019	0.002417	0.589303	7.74688	5.25318	6	5	0	0	0.980391	0.990765	9e-05	0.000449793	ENSG00000243064	-293	1_Active_TSS	0	0	0	0	1	1	0	0	ERalpha-a_disc4|0|0.809452573756005|10|+|9.534411826604|10.34386440036
rs60809509	16:85455998-85456727	16	85456065	C	T	0.105263	0.262976	0.915397	0.915397	14.3685	0.638267	2.1e-05	0.453744	41.0068	5.31348	3	3	0.709354	0	0.915453	0.889716	0.000150296	0.000450887	ENSG00000220991	106730	10_Active_enhancer_2	1	1	0	1	0	1	1	1	Maf_known2|0|11.64433331544|1|+|-3.84157661472801|7.802756700712
rs62272482	3:102167877-102168445	3	102168236	C	A	0.289474	0.43618	1	1	12.299	0.311505	0.000242	0.378966	18.7258	3.78576	1	1	0	0	0.993191	0.993191	0.000453212	0.000453212	ENSG00000241754	224880	18_Quiescent/low_signal	0	0	0	0	1	0	0	0	Irf_known5|0|-11.480885520016|12|-|20.320472|8.83958647998399
rs2677885	18:2518467-2518902	18	2518578	G	C	0.342105	1.5558	1	1	14.8802	0.610098	1.4e-05	0.530091	12.6563	4.56148	4	4	6.27429	0	0.995566	0.993568	0.000114559	0.000458236	ENSG00000238575	-36891	10_Active_enhancer_2	0	1	0	0	1	1	1	1	Nrf-2_2|0|2.80423099825099|8|+|9.754087526123|12.558318524374
rs616898	18:9952593-9953250	18	9952788	G	A	0.578947	2.35783	1	1	13.5667	0.377936	3.4e-05	0.411264	26.349	4.63464	2	2	-3.4e-05	0	0.996415	0.996963	0.000230236	0.000460472	ENSG00000223138	28675	5_Strong_transcription	1	0	0	0	0	0	0	0	TCF11::MafG|0|-11.74385950514|10|-|10.262628556587|-1.48123094855301
rs4628522	1:84289890-84290129	1	84289948	T	G	0.394737	3.83512	1	1	12.267	0.291696	0.000153	0.370625	10.2238	2.58341	1	1	0	0	0.995711	0.995711	0.000461035	0.000461035	ENSG00000223231	30329	6_Weak_transcription	0	0	0	0	0	0	0	0	NA
rs35098654	12:9800262-9801300	12	9800589	G	T	0.105263	0.262976	0.921727	0.921727	14.8541	0.322427	0.00073	0.509802	25.629	5.31052	4	4	17.67	0	0.890787	0.840106	0.000116153	0.000464611	ENSG00000233719	5486	1_Active_TSS	0	0	1	0	1	1	0	0	SP1_known1|0|-4.94207470457999|4|+|12.44513226817|7.50305756358999
rs509370	18:10530639-10531269	18	10530928	T	C	0.552632	0.554724	0.999681	0.999681	13.5442	0.653231	5e-05	0.650682	26.8957	4.39332	2	2	0.015859	0	0.993257	0.992059	0.00023301	0.000466019	ENSG00000134265	4765	10_Active_enhancer_2	1	1	0	0	0	0	1	1	NA
rs7643638	3:145525693-145526069	3	145525989	C	T	0.342105	0.626168	1	1	13.5313	0.65407	6.4e-05	0.592724	23.4114	3.5687	2	2	0	0	0.99319	0.994077	0.000234622	0.000469245	ENSG00000239797	16833	18_Quiescent/low_signal	0	0	0	1	0	0	0	0	Lmo2-complex_2|0|10.819708941104|2|-|1.540562355148|12.360271296252
rs2904953	5:8773115-8773732	5	8773335	A	C	0.763158	1.40601	1	1	12.2123	0.654327	0.007232	0.53092	21.6296	3.79905	2	1	0	0	0.996007	0.992979	0.000474746	0.000474746	ENSG00000243750	150931	17_Weak_repressed_polycomb	0	0	0	0	0	0	1	0	NA
rs7677630	4:24489099-24489750	4	24489339	A	G	0.684211	1.37722	1	1	14.2695	0.681133	0.003763	0.55166	9.97019	3.85713	3	3	0.939734	0	0.993161	0.991427	0.000158409	0.000475226	ENSG00000207697	32814	18_Quiescent/low_signal	1	0	1	0	1	1	1	0	NA
rs1332947	1:178062378-178063861	1	178062930	A	G	0.105263	0.262976	0.917135	0.917135	13.5064	0.379096	0.005091	0.481306	28.7739	6.35118	5	2	15.3283	0	0.772289	0.571147	0.000237745	0.00047549	ENSG00000224687	741	1_Active_TSS	0	1	0	1	1	1	0	0	NRSF_disc9|0|-0.352847307079998|9|-|11.48613545814|11.13328815106
rs34584161	13:26776688-26777784	13	26776999	A	G	0.263158	0.139592	0.986251	0.986251	16.1029	0.347154	0.004596	0.492495	29.5014	4.69024	7	8	0.881545	0	0.988643	0.976011	6e-05	0.00047994	ENSG00000245354	-10224	10_Active_enhancer_2	1	1	1	0	1	1	1	1	Bach1|0|-11.96610935299|5|-|9.65761741543001|-2.30849193756001
rs9812067	3:117593880-117594860	3	117594641	T	C	0.184211	0.968783	1	1	14.2462	0.287586	4.1e-05	0.613062	12.6303	3.28396	4	3	-1.3e-05	0	0.994494	0.986597	0.00016038	0.00048114	ENSG00000242816	84359	18_Quiescent/low_signal	1	0	0	0	0	0	0	0	Irf_known3|0|-11.966094694422|8|-|11.532599775089|-0.433494919333
rs1597108	3:103821294-103821583	3	103821433	C	T	0.263158	0.139592	0.999051	0.999051	13.4821	0.349973	3.8e-05	0.411379	19.9006	3.47148	3	2	0.746307	0	0.992142	0.993777	0.000240851	0.000481702	ENSG00000214405	39416	18_Quiescent/low_signal	1	0	0	1	0	0	0	0	LBP-1_2|0|-11.22941438955|7|+|12.197143|0.967728610449996
rs73008056	3:144461879-144462444	3	144462107	C	T	0.236842	0.006973	0.991946	0.991946	12.1843	0.301057	0.000172	0.411053	14.5958	3.64144	1	1	0	0	0.984417	0.984417	0.00048194	0.00048194	ENSG00000241555	-556017	18_Quiescent/low_signal	0	0	0	0	0	0	0	0	Ets_known9|0|-11.589703960176|3|+|6.94680328300799|-4.642900677168
rs9728510	1:216296955-216297686	1	216297468	G	T	0.368421	0.325822	0.984197	0.984197	14.7822	0.290408	0.005791	0.472973	8.86579	3.80218	3	4	0	0	0.978946	0.969319	0.000120669	0.000482677	ENSG00000233620	51147	18_Quiescent/low_signal	1	1	0	0	0	0	1	0	Mxi1_disc1|0|-1.73562196617|6|+|8.79128944283499|7.05566747666499
rs11207905	1:62596894-62597020	1	62596969	C	G	0.263158	0.139592	0.942685	0.942685	12.1448	0.305273	0.000135	0.349119	18.2315	2.93841	1	1	0	0	0.909849	0.909849	0.000492262	0.000492262	ENSG00000225771	-12213	6_Weak_transcription	0	0	0	1	0	0	0	0	1
rs9526002	13:45343383-45343822	13	45343590	A	G	0.5	4.26316	0.99958	0.99958	13.4335	0.331255	0.000188	0.378849	14.0334	3.18567	1	2	0	0	0.995508	0.995508	0.000247171	0.000494342	ENSG00000235097	40383	10_Active_enhancer_2	0	0	0	0	0	0	0	0	STAT_disc2|0|-11.96611370544|8|+|12.54275211782|0.576638412380007
rs62325139	4:154712195-154712533	4	154712213	C	T	0.184211	0.294145	0.998426	0.998426	14.1915	0.633193	0.000115	0.489627	28.2805	3.49322	2	3	3.97843	0	0.995957	0.99173	0.000165111	0.000495334	ENSG00000145423	-1967	14_Bivalent/poised_TSS	0	0	0	0	0	0	0	0	LBP-1_3|0|0.736523750825|13|+|13.95343011355|14.689953864375
rs61897481	11:55640017-55641117	11	55640882	C	T	0.105263	0.262976	0.999441	0.999441	15.1497	0.274602	0.001774	0.42566	5.93643	4.85241	3	5	7.80547	0	0.995263	0.986776	9.93e-05	0.000496565	ENSG00000124900	-10757	18_Quiescent/low_signal	0	0	0	1	1	1	0	1	BCL_disc10|0|-11.477779140408|5|+|10.662220848984|-0.815558291423997
rs10456254	6:22236855-22237299	6	22236945	C	G	0.105263	0.262976	0.988776	0.988776	13.4094	0.645014	0.006305	0.436201	31.5965	4.38517	2	2	-5.3e-05	0	0.989746	0.975979	0.00025036	0.000500721	ENSG00000219404	-22389	18_Quiescent/low_signal	1	1	1	0	0	1	0	0	NA
rs4395661	5:36367032-36367373	5	36367125	C	T	0.552632	0.554724	1	1	12.1116	0.300195	0.00013	0.397169	16.9533	2.78587	2	1	0	0	0.965005	0.993169	0.000501088	0.000501088	ENSG00000164188	-65028	18_Quiescent/low_signal	1	0	0	0	0	0	0	0	Foxo_2|0|-0.735972896780012|2|-|10.66312938323|9.92715648644999
rs1472932	17:19220603-19220987	17	19220666	G	A	0.578947	0.353306	0.98197	0.98197	12.0899	0.362219	0.000206	0.37131	20.1849	3.90627	1	1	0	0	0.975835	0.975835	0.00050696	0.00050696	ENSG00000240686	5932	10_Active_enhancer_2	0	0	1	1	1	1	0	0	TCF12_known1|0|-11.966139153432|1|-|13.933231843276|1.96709268984399
rs73211941	3:131937624-131938232	3	131937788	T	C	0.157895	0.824653	1	1	15.7449	0.315355	0.002238	0.475821	9.21787	3.58168	7	7	-3e-06	0	0.992553	0.993038	7.25e-05	0.000507395	ENSG00000242899	25485	18_Quiescent/low_signal	1	1	0	0	0	0	1	0	NA
rs34365533	1:11967844-11969662	1	11968495	T	T	0.105263	0.262976	0.999164	0.999164	18.2337	0.578169	0.000535	0.497165	26.7176	6.13603	36	26	0.037635	0	0.960935	0.97501	1.95e-05	0.000508023	ENSG00000199347	-366	17_Weak_repressed_polycomb	1	1	0	1	1	1	1	1	CACD_2|0|7.75637995723501|0|+|3.72674249159499|11.48312244883
rs11675226	2:213600453-213601481	2	213600922	T	A	0.473684	6.34272	1	1	12.0742	0.59799	0.005506	0.544959	27.1534	4.88004	3	1	0	0	0.991294	0.996707	0.000511241	0.000511241	ENSG00000221388	27946	18_Quiescent/low_signal	1	0	0	0	1	1	0	0	TCF12_disc2|0|2.26582637153599|1|-|9.798335873768|12.064162245304
rs6450182	5:53553438-53554056	5	53553830	T	C	0.105263	0.262976	1	1	13.3645	0.272328	1.9e-05	0.457171	18.753	4.18515	3	2	0.019515	0	0.979368	0.987858	0.000256438	0.000512876	ENSG00000185305	52965	10_Active_enhancer_2	1	1	0	0	0	1	0	1	NA
rs61824103	1:222638172-222639333	1	222639237	T	C	0.421053	2.35783	1	1	15.0862	0.569519	0.002587	0.489986	43.6189	5.83843	7	5	2.77668	0	0.985486	0.99695	0.000102712	0.000513559	ENSG00000234419	-3265	6_Weak_transcription	1	0	0	1	1	1	0	1	1
rs4861651	4:185905002-185905426	4	185905039	A	T	0.394737	0.996253	0.998572	0.998572	14.1187	0.612404	1.6e-05	0.433927	45.005	4.47511	4	3	0	0	0.934886	0.994952	0.000171632	0.000514897	ENSG00000232033	4227	17_Weak_repressed_polycomb	0	1	1	1	1	0	0	0	MAZ|0|11.703166887717|5|-|1.360351442273|13.06351832999
rs7500590	16:3493261-3494084	16	3493301	T	C	0.236842	0.006973	0.962725	0.962725	14.1041	0.243505	4.6e-05	0.393265	1.08708	4.19967	6	3	47.1202	0	0.968011	0.930379	0.000172965	0.000518896	ENSG00000122390	-422	1_Active_TSS	0	0	0	0	1	1	0	0	TATA_known5|0|-10.078222164771|4|+|12.050319220023|1.97209705525199
rs6871476	5:163058796-163059531	5	163059511	T	C	0.605263	0.001437	0.991406	0.991406	15.0652	0.653695	3.2e-05	0.47607	24.0622	4.3842	6	5	0	0	0.994271	0.985703	0.000103861	0.000519303	ENSG00000224012	77722	6_Weak_transcription	1	1	0	0	1	1	1	1	Whn|0|11.966175075652|6|+|0.475323888054|12.441498963706
rs17394978	4:78189186-78189717	4	78189260	A	C	0.184211	0.968783	0.999126	0.999126	15.9388	0.282262	0.006831	0.312689	24.3581	4.48644	6	8	1.49678	0	0.984562	0.989085	6.54e-05	0.00052338	ENSG00000138764	110828	17_Weak_repressed_polycomb	1	0	0	0	0	0	0	1	PRDM1_known1|0|-11.966269217175|10|+|5.04555054772999|-6.92071866944499
rs67620169	7:104895431-104895740	7	104895639	C	T	0.394737	0.001437	1	1	12.0074	0.274355	0.00056	0.425093	10.3763	2.36326	1	1	0	0	0.993035	0.993035	0.000529884	0.000529884	ENSG00000213361	10331	6_Weak_transcription	0	0	0	0	0	0	0	0	NA
rs7087815	10:128888366-128888840	10	128888548	A	G	0.236842	0.006973	1	1	15.0248	0.750534	7.7e-05	0.533924	5.33061	4.1071	3	5	0	0	0.992622	0.994243	0.000106106	0.000530531	ENSG00000223528	-63679	6_Weak_transcription	0	0	0	0	0	0	0	0	TCF12_disc2|0|9.99454826188|6|-|2.66742269887601|12.661970960756
rs11629859	15:45546863-45547217	15	45547121	T	G	0.526316	2.55444	0.999578	0.999578	14.6011	0.346004	0.010341	0.54274	14.53	3.43283	4	4	0	0	0.994873	0.996762	0.000132839	0.000531355	ENSG00000137860	2429	18_Quiescent/low_signal	1	0	0	0	0	0	1	0	Foxa_disc2|0|-0.485007551235995|10|-|5.825281047236|5.34027349600001
rs11953656	5:119588466-119589051	5	119588950	G	A	0.289474	0.206997	0.999617	0.999617	15.0191	0.585002	0.000668	0.453442	21.762	5.74293	5	5	0.91602	0	0.996009	0.995481	0.000106428	0.000532142	ENSG00000244263	84882	10_Active_enhancer_2	1	1	0	0	0	0	1	1	Evi-1_4|0|10.55170108949|10|-|0.666016513479008|11.217717602969
rs79923447	2:174075011-174075766	2	174075341	A	G	0.052632	0.058642	0.998945	0.998945	15.0184	0.321147	0.000583	0.484901	30.989	5.08811	5	5	8.33105	0	0.994507	0.977866	0.00010647	0.000532348	ENSG00000238133	71753	10_Active_enhancer_2	1	1	0	1	1	0	1	1	AP-1_disc9|0|-1.783148451462|6|-|14.678609|12.895460548538
rs7576384	2:113992852-113993555	2	113993385	C	G	0.342105	1.5558	0.968074	0.968074	14.0504	0.279173	4.5e-05	0.373823	5.4111	4.4706	3	3	0	0	0.958063	0.91385	0.000177974	0.000533923	ENSG00000189223	23752	1_Active_TSS	0	0	0	0	0	0	0	0	TR4_disc1|0|-11.862096789307|6|+|14.133360070742|2.271263281435
rs13951	1:117531544-117531912	1	117531620	G	A	0.5	0.473684	1	1	14.5888	0.744323	5.2e-05	0.627462	5.78043	3.56743	4	4	0.008616	0	0.992854	0.984224	0.000133706	0.000534822	ENSG00000134256	-12839	6_Weak_transcription	1	1	0	0	0	0	0	0	1
rs17122779	14:23288451-23289212	14	23289056	A	G	0.236842	1.40601	1	1	15.3531	0.317156	2.6e-05	0.389989	15.3047	4.39777	5	6	0.121512	0	0.976289	0.992737	8.92e-05	0.000535036	ENSG00000215306	3299	10_Active_enhancer_2	1	0	0	0	1	1	0	0	Rad21_disc10|0|-11.399593567675|3|+|12.429395386956|1.029801819281
rs11242436	5:137937115-137937411	5	137937318	A	G	0.394737	0.001437	0.99978	0.99978	13.2847	0.66767	2.3e-05	0.647851	14.4267	2.96692	4	2	0.389557	0	0.988902	0.994203	0.000267581	0.000535162	ENSG00000232174	-18904	18_Quiescent/low_signal	0	0	0	0	0	0	0	0	BAF155_disc1|0|11.954161677654|7|-|-0.418992855415993|11.535168822238
rs7826632	8:13512551-13512815	8	13512766	C	T	0.447368	1.23453	0.999044	0.999044	14.0346	0.683221	5.7e-05	0.669473	10.0135	3.39948	3	3	0	0	0.991146	0.993907	0.000179478	0.000538435	ENSG00000164743	88198	18_Quiescent/low_signal	1	0	0	1	0	0	0	0	RXRA_disc2|0|11.885284719944|13|+|0.672519504839997|12.557804224784
rs17143733	7:121394181-121394569	7	121394450	T	C	0.052632	0.058642	0.981367	0.981367	13.2468	0.734357	2.7e-05	0.544302	18.2899	4.17418	3	2	8.15738	0	0.974719	0.95962	0.000273048	0.000546097	ENSG00000243624	17683	18_Quiescent/low_signal	1	0	0	0	0	0	0	0	NF-I_1|0|10.966442297398|21|-|4.66355815185801|15.630000449256
rs6872617	5:155605278-155605435	5	155605397	C	A	0.315789	0.902531	0.993612	0.993612	13.9868	0.26197	0.012637	0.343102	7.49322	2.23554	6	3	0	0	0.965656	0.973737	0.000184095	0.000552285	ENSG00000240417	-93733	17_Weak_repressed_polycomb	0	0	0	0	1	0	0	0	Nanog_disc4|0|-1.45084262561099|3|+|11.981079318052|10.530236692441
rs9351949	6:73581577-73582286	6	73581987	A	G	0.526316	0.058642	1	1	13.2233	0.334519	4.3e-05	0.413193	12.8412	5.38042	2	2	0	0	0.995247	0.995757	0.00027649	0.000552979	ENSG00000232422	-114460	10_Active_enhancer_2	1	1	0	0	0	0	1	1	Pou2f2_known9|0|-11.966197276788|9|+|10.919793671196|-1.046403605592
rs10245302	7:70294106-70294512	7	70294323	A	C	0.184211	0.294145	0.999825	0.999825	14.9361	0.30201	7e-05	0.513211	10.1214	3.44626	4	5	7.73245	0	0.955596	0.989665	0.000111217	0.000556086	ENSG00000236978	-8619	16_Repressed_polycomb	0	0	0	1	1	0	0	0	NA
rs635958	5:115961962-115962432	5	115961967	C	T	0.421053	2.35783	0.999892	0.999892	14.9161	0.658814	0.001986	0.478366	18.4469	3.7751	6	5	0.728565	0	0.970895	0.994548	0.000112397	0.000561985	ENSG00000092421	-51411	10_Active_enhancer_2	0	0	0	0	1	0	0	0	Myf_1|0|0.362484936164009|11|+|12.693111780332|13.055596716496
rs2447603	3:11590153-11590559	3	11590261	T	C	0.236842	0.006973	1	1	13.1889	0.255882	0.000124	0.279366	6.81783	3.79249	1	2	0	0	0.985875	0.985875	0.000281608	0.000563215	ENSG00000247436	-13239	6_Weak_transcription	0	0	0	0	1	1	1	1	NA
rs2536724	12:9608173-9608468	12	9608282	C	T	0.631579	0.325822	0.905874	0.905874	13.1603	0.275159	0.000678	0.298256	11.5893	2.39488	2	2	0	0	0.862904	0.727949	0.000285947	0.000571895	ENSG00000214826	-7349	18_Quiescent/low_signal	0	0	0	0	0	0	0	0	Ets_known1|0|-11.351243034738|2|+|12.583162620218|1.23191958547999
rs17487256	18:50717947-50718798	18	50718314	C	T	0.315789	0.012492	1	1	13.1474	0.328292	0.000156	0.484811	19.7309	3.99581	2	2	0.203559	0	0.990838	0.991539	0.000287915	0.000575831	ENSG00000221291	254282	18_Quiescent/low_signal	1	0	0	0	0	0	0	0	NA
rs76736746	2:191197739-191197951	2	191197911	G	A	0.236842	0.006973	0.998692	0.998692	13.1394	0.276512	7.9e-05	0.599694	4.34602	2.50777	2	2	0.683186	0	0.988114	0.989708	0.000289144	0.000578288	ENSG00000151689	-10458	6_Weak_transcription	0	0	0	0	1	0	0	0	NA
rs56212865	14:92116440-92116663	14	92116459	G	C	0.184211	0.294145	0.99965	0.99965	13.8998	0.709663	0.000126	0.318116	17.0092	2.66828	2	3	-8.6e-05	0	0.990074	0.993307	0.000192816	0.000578448	ENSG00000200042	65034	18_Quiescent/low_signal	0	0	0	1	0	0	0	0	NA
rs706344	4:140549291-140549948	4	140549479	A	G	0.131579	0.43618	0.995184	0.995184	14.429	0.715062	6.7e-05	0.543746	12.9105	4.09667	3	4	1.50684	0	0.993236	0.985523	0.000145545	0.000582179	ENSG00000085871	-37632	18_Quiescent/low_signal	1	1	1	0	1	0	0	0	LXR_2|0|11.28835128069|6|+|-4.02804184157999|7.26030943911
rs1391649	5:58375778-58376421	5	58376006	A	C	0.342105	3.27834	1	1	13.1235	0.367037	0.017035	0.381863	28.0937	4.82205	2	2	1.27672	0	0.97256	0.996739	0.000291618	0.000583236	ENSG00000247345	40742	10_Active_enhancer_2	1	0	1	0	1	1	1	1	Pax-6_1|0|-3.51591010335|10|-|11.2167812196|7.70087111625
rs6684794	1:81889820-81890124	1	81889879	G	A	0.526316	0.058642	1	1	13.882	0.373231	2.1e-05	0.51661	20.4547	3.34839	5	3	0.694388	0	0.985079	0.994815	0.000194651	0.000583954	ENSG00000224494	-2322	18_Quiescent/low_signal	0	0	0	0	0	0	0	0	STAT_known11|0|-11.966146115094|8|-|12.80820062933|0.842054514236011
rs34567661	1:100287020-100287328	1	100287321	T	C	0.368421	0.172336	1	1	14.4231	0.667547	9.3e-05	0.635179	13.0832	2.49813	4	4	0	0	0.974101	0.994893	0.000146	0.000584	ENSG00000231996	-21147	18_Quiescent/low_signal	0	0	0	0	0	0	0	0	Cdx2_2|0|0.860025863564999|15|-|10.423073297822|11.283099161387
rs28672838	7:13912301-13912589	7	13912442	G	A	0.236842	1.40601	1	1	13.1196	0.311909	9e-05	0.48936	19.8225	2.76246	2	2	6.90661	0	0.98942	0.993261	0.00029222	0.00058444	ENSG00000213875	819	18_Quiescent/low_signal	1	0	0	0	0	0	1	0	SETDB1_disc1|0|-6.96624012618301|8|+|6.75281341298702|-0.213426713195986
rs2296357	6:7389565-7390558	6	7389945	G	C	0.447368	0.033543	0.984994	0.984994	13.8771	0.559716	0.00108	0.487234	41.2796	6.28855	4	3	4.88622	0	0.993558	0.981132	0.000195158	0.000585475	ENSG00000124784	-165	1_Active_TSS	0	0	0	1	1	1	1	0	Klf7|0|8.33071197151201|10|+|4.082885674888|12.4135976464
rs1036433	11:131756174-131756622	11	131756435	T	C	0.394737	0.996253	1	1	13.1142	0.34202	0.006894	0.450239	15.0381	3.66859	3	2	0.042749	0	0.978459	0.996098	0.000293064	0.000586128	ENSG00000238117	10828	17_Weak_repressed_polycomb	1	0	0	0	0	0	0	1	NA
rs4879279	9:28918983-28919607	9	28919265	A	G	0.736842	0.139592	0.99878	0.99878	13.1017	0.37896	0.0035	0.576651	21.8653	4.91445	2	2	0	0	0.99617	0.993486	0.000295035	0.000590069	ENSG00000215939	-30030	6_Weak_transcription	1	1	0	0	0	1	1	1	Pax-6_1|0|-4.23985859040002|17|+|19.7694803277|15.5296217373
rs7801691	7:12105640-12106731	7	12105861	G	C	0.078947	0.139592	0.998917	0.998917	15.1662	0.643985	0.004681	0.465321	34.1679	6.35522	6	6	1.54883	0	0.977872	0.98475	9.84e-05	0.000590693	ENSG00000106460	-145228	10_Active_enhancer_2	1	0	0	0	1	1	0	0	Foxf2|0|11.855128053424|4|-|-0.601073055997006|11.254054997427
rs194743	14:69285960-69286262	14	69286152	T	C	0.789474	0.0475	1	1	11.7844	0.329842	0.000103	0.414455	20.8044	3.93393	1	1	0	0	0.992244	0.992244	0.000597282	0.000597282	ENSG00000221899	-22770	10_Active_enhancer_2	0	0	0	0	0	0	0	0	Pou3f3|0|-2.60524915948798|1|+|12.270224783776|9.664975624288
rs79659083	3:39302489-39302821	3	39302659	C	A	0.078947	7.73614	0.99605	0.99605	11.777	0.29797	0.004627	0.503434	14.0842	3.71644	1	1	0	0	0.986884	0.986884	0.000599665	0.000599665	ENSG00000244856	-17679	18_Quiescent/low_signal	1	1	0	1	0	0	0	0	PPAR_3|0|-11.96614544378|6|-|10.10465541376|-1.86149003002001
rs918517	5:159154845-159155490	5	159155280	A	G	0.657895	0.051986	0.96107	0.96107	13.071	0.64174	1.2e-05	0.458858	15.6422	4.47659	5	2	0	0	0.973128	0.900188	0.000299907	0.000599814	ENSG00000238839	5731	10_Active_enhancer_2	1	1	0	0	0	0	1	0	Nrf1_known2|0|0.192492433016|3|+|11.543923219164|11.73641565218
rs10945478	6:168607488-168607963	6	168607709	G	C	0.131579	0.43618	1	1	13.8199	0.300817	0.006491	0.3216	10.3291	4.04779	5	3	4.45083	0	0.989053	0.980711	0.000201199	0.000603596	ENSG00000234768	12449	10_Active_enhancer_2	0	0	1	0	1	1	1	1	RFX5_known2|0|-11.96611907616|16|-|11.43851994104|-0.527599135119999
rs11708067	3:123065440-123066022	3	123065778	A	G	0.184211	0.294145	0.99965	0.99965	15.1223	0.642568	0.013515	0.503266	25.689	4.3192	5	6	2.49761	0	0.933007	0.993878	0.000100768	0.000604608	ENSG00000173175	103165	10_Active_enhancer_2	0	0	0	1	1	0	1	1	NA
rs10834031	11:3443313-3444844	11	3443925	A	G	0.342105	0.051986	0.740289	0.740289	16.0738	0.576094	0.002608	0.429938	17.6045	6.70631	18	10	0.540957	0	0.683247	0.571183	6.09e-05	0.000609209	ENSG00000166492	436	1_Active_TSS	0	0	0	0	1	1	0	0	STAT_disc7|0|2.18164349183|8|+|11.898893772568|14.080537264398
rs1040861	6:3023869-3024504	6	3023956	C	A	0.368421	0.172336	1	1	13.0397	0.662957	0.000203	0.450293	18.0174	4.21587	2	2	0	0	0.993671	0.994503	0.000304951	0.000609902	ENSG00000245431	-1157	1_Active_TSS	0	0	0	0	1	0	0	0	Maf_known2|0|11.966082212952|11|-|-6.669144881384|5.29693733156799
rs61846275	10:11861820-11862084	10	11861950	T	C	0.157895	0.667969	0.939483	0.939483	13.7923	0.347235	0.002463	0.491629	15.5085	3.09842	5	3	15.1747	0	0.66619	0.87452	0.000204174	0.000612521	ENSG00000148426	-3519	2_Weak_TSS	0	0	0	1	1	0	0	0	PLZF|0|-10.481273671916|21|+|8.69045671164798|-1.79081696026802
rs55878719	2:105701942-105702339	2	105702278	A	G	0.236842	0.006973	1	1	11.7358	0.30919	0.000116	0.407306	10.9054	3.66733	1	1	0	0	0.991306	0.991306	0.000613098	0.000613098	ENSG00000231851	17460	6_Weak_transcription	0	0	0	0	0	0	0	0	AP-1_known4|0|-11.858979727455|6|-|12.280588391695|0.421608664240011
rs9525016	13:96193071-96193673	13	96193271	G	A	0.315789	4.99671	0.957253	0.957253	11.733	0.380074	4.1e-05	0.550254	28.0019	4.27244	1	1	0	0	0.933173	0.933173	0.000614025	0.000614025	ENSG00000223392	-6907	17_Weak_repressed_polycomb	1	1	1	0	1	0	1	0	Myc_disc9|0|-11.343016842091|4|+|10.534839684512|-0.808177157578996
rs601856	20:58662806-58663042	20	58662835	A	G	0.368421	2.42347	0.780909	0.780909	15.6301	0.292088	0.034057	0.345103	6.59373	2.33036	11	8	0.01909	0	0.690216	0.483957	7.7e-05	0.000616156	ENSG00000228340	-90	14_Bivalent/poised_TSS	0	0	0	0	1	0	0	0	NA
rs11741608	5:103748523-103748997	5	103748792	G	A	0.105263	0.262976	0.999442	0.999442	13.0115	0.262047	3.9e-05	0.325209	18.8031	3.95689	2	2	2.11111	0	0.966466	0.98464	0.000309589	0.000619179	ENSG00000239808	-151996	18_Quiescent/low_signal	0	0	0	1	0	0	0	0	Rad21_disc7|0|-11.532015531288|14|+|12.18396968818|0.651954156892003
rs36084167	12:107730129-107730972	12	107730247	TCA	T	0.315789	0.012492	0.999878	0.999878	13.7715	0.651889	8.8e-05	0.595909	24.5065	4.41653	2	3	0.019511	0	0.991568	0.991747	0.000206449	0.000619346	ENSG00000151136	17938	6_Weak_transcription	1	1	0	0	0	1	1	0	Ets_known9|0|30.194675703216|11|-|-19.364095841856|10.83057986136
rs1874308	12:54954210-54954586	12	54954356	A	T	0.578947	1.65857	0.996216	0.996216	13.0084	0.556673	0.002027	0.499412	43.7335	5.17635	2	2	0.155492	0	0.985292	0.989351	0.000310105	0.00062021	ENSG00000123360	10805	1_Active_TSS	0	0	0	0	1	1	0	0	AP-1_disc1|0|11.966161326416|7|+|-0.625562965808001|11.340598360608
rs77100210	12:10874460-10876244	12	10875928	A	C	0.105263	0.262976	0.958883	0.958883	14.3009	0.651427	0.014524	0.501003	28.83	5.91041	5	4	-114.733	0	0.960133	0.940348	0.000155789	0.000623154	ENSG00000060138	1493	1_Active_TSS	0	0	0	0	1	1	0	0	NA
rs7132434	12:26472547-26472858	12	26472562	A	G	0.552632	2.79807	1	1	14.2962	0.30905	0.000215	0.330777	15.5122	3.35882	4	4	0	0	0.960711	0.991208	0.000156178	0.000624714	ENSG00000212549	54119	6_Weak_transcription	0	0	0	0	0	0	0	0	Bach2|0|-11.850684893036|9|+|11.467666437236|-0.383018455799998
rs10958177	8:51810534-51810841	8	51810694	T	C	0.263158	0.139592	1	1	11.6988	0.674646	0.000304	0.550194	25.6875	3.08123	1	1	0	0	0.992142	0.992142	0.000625417	0.000625417	ENSG00000201316	-117048	17_Weak_repressed_polycomb	0	0	0	0	0	0	0	0	NA
rs12404321	1:24175634-24175890	1	24175763	A	G	0.157895	0.824653	1	1	11.6936	0.273341	0.010607	0.38717	22.1731	2.56021	2	1	0	0	0.984963	0.991042	0.000627165	0.000627165	ENSG00000179163	19150	6_Weak_transcription	0	0	0	0	0	1	0	0	1
rs7014646	8:69721025-69721506	8	69721030	A	G	0.289474	3.15363	1	1	13.7411	0.271147	5e-05	0.34087	15.0963	4.12539	2	3	0	0	0.988133	0.98999	0.000209811	0.000629433	ENSG00000240447	91498	17_Weak_repressed_polycomb	1	1	0	0	0	0	1	0	Mef2_known2|0|-11.96614518086|11|-|12.86630469444|0.900159513579993
rs12539177	7:110977603-110977869	7	110977701	A	C	0.473684	0.459753	0.994803	0.994803	11.6812	0.294685	0.019862	0.356528	6.17808	3.09007	1	1	0	0	0.991179	0.991179	0.000631352	0.000631352	ENSG00000243621	-57329	18_Quiescent/low_signal	0	0	0	0	0	0	0	0	Irf_known6|0|-11.85067335672|6|+|4.34499908738999|-7.50567426933
rs2961919	5:159902916-159903283	5	159903134	G	A	0.5	1.31579	0.970564	0.970564	11.6797	0.690327	0.000118	0.430316	14.3879	3.0321	1	1	0	0	0.932785	0.932785	0.000631852	0.000631852	ENSG00000207936	-9444	17_Weak_repressed_polycomb	1	0	0	0	1	0	0	0	Ets_known1|0|10.128906544302|7|-|3.77064609948199|13.899552643784
rs4809135	19:21751774-21752563	19	21751988	C	T	0.368421	1.96301	0.993263	0.993263	16.1806	0.265953	0.073872	0.515459	0.523375	5.02853	10	11	0	0	0.95718	0.965357	5.76e-05	0.000633396	ENSG00000197013	63336	1_Active_TSS	1	1	0	0	1	1	0	1	ERalpha-a_known4|0|-1.21763757772401|18|+|11.37082611554|10.153188537816
rs9977431	21:16465120-16465675	21	16465246	G	A	0.210526	0.0475	1	1	14.2647	0.649648	5.4e-05	0.496089	29.1896	4.05403	4	4	0	0	0.979189	0.99389	0.000158818	0.000635272	ENSG00000236471	25728	18_Quiescent/low_signal	1	0	0	0	0	0	0	0	HDAC2_disc6|0|9.06146661099999|13|-|3.01227248330002|12.0737390943
rs62193708	2:209419434-209420224	2	209419966	C	A	0.131579	0.43618	0.976342	0.976342	11.6638	0.290199	0.000108	0.351041	15.317	3.99967	2	1	0	0	0.784967	0.728832	0.000637285	0.000637285	ENSG00000232409	37800	18_Quiescent/low_signal	1	1	0	0	0	1	1	0	MIF-1|0|-11.966186889734|15|+|11.773985649012|-0.192201240722
rs10973998	9:3880918-3881165	9	3881005	C	G	0.263158	0.139592	0.995153	0.995153	12.9571	0.350473	0.003117	0.491525	21.4993	4.17988	3	2	0	0	0.99353	0.989062	0.000318712	0.000637425	ENSG00000236724	5333	10_Active_enhancer_2	0	0	0	0	0	1	0	1	NF-E2_known1|0|-8.799131423536|4|+|13.026564616993|4.227433193457
rs10850761	12:117549182-117550134	12	117549426	C	T	0.631579	1.96301	1	1	12.9567	0.623936	0.006407	0.564333	11.741	4.60188	2	2	4.03099	0	0.997066	0.996613	0.000318786	0.000637572	ENSG00000088992	-11898	10_Active_enhancer_2	0	0	0	0	1	1	1	1	TLX1::NFIC|0|11.9662088373|14|-|-6.96085019903398|5.00535863826602
rs4940336	18:45742680-45742946	18	45742837	G	A	0.157895	0.667969	0.999605	0.999605	11.6537	0.276858	0.000157	0.307651	20.9031	3.04389	1	1	0	0	0.986228	0.986228	0.00064076	0.00064076	ENSG00000235599	-35993	10_Active_enhancer_2	0	0	1	0	1	1	0	0	LBP-1_3|0|-11.8056603216|2|-|11.45913242705|-0.346527894549993
rs12407945	1:234397847-234398887	1	234398692	C	T	0.131579	0.43618	1	1	13.7025	0.653167	0.000557	0.544599	22.3704	4.55742	4	3	0	0	0.898339	0.989753	0.00021417	0.00064251	ENSG00000231272	394	10_Active_enhancer_2	1	1	0	0	1	0	1	1	p300_disc3|0|11.966139133284|3|+|0.944682694688005|12.910821827972
rs941718	14:23494581-23495222	14	23495048	T	C	0.447368	1.23453	1	1	12.9214	0.628261	5.5e-05	0.517869	24.1555	4.40337	2	2	0	0	0.988998	0.996612	0.000324839	0.000649679	ENSG00000207765	8266	11_Weak_enhancer	1	1	0	0	0	1	1	0	NA
rs4720545	7:46620479-46620675	7	46620552	G	A	0.421053	0.120222	0.979319	0.979319	11.612	0.266862	0.000208	0.407943	7.463	2.58743	1	1	0	0	0.945925	0.945925	0.000655277	0.000655277	ENSG00000224519	-53734	18_Quiescent/low_signal	0	0	0	0	0	0	1	0	Arnt_1|0|-0.347715987245991|4|+|-4.038972874465|-4.38668886171099
rs9818471	3:166847539-166848748	3	166848553	C	T	0.236842	0.006973	0.998262	0.998262	13.661	0.308424	1.6e-05	0.46378	18.8166	4.54332	5	3	2.66426	0	0.976396	0.900974	0.000218955	0.000656864	ENSG00000220343	63919	18_Quiescent/low_signal	0	0	0	0	1	1	1	1	Pax-6_1|0|-5.44290925634999|12|+|15.8924593317|10.44955007535
rs16896660	4:18205034-18205412	4	18205128	C	A	0.236842	1.82996	0.999855	0.999855	12.8943	0.289793	8.1e-05	0.512434	6.22922	2.9192	2	2	4.49242	0	0.95825	0.987458	0.000329587	0.000659174	ENSG00000178177	-181535	10_Active_enhancer_2	0	0	0	0	0	0	0	1	TFE|0|-11.913650758032|5|-|12.647583986544|0.733933228512001
rs4142721	3:8383613-8383907	3	8383697	G	A	0.473684	1.35111	0.997169	0.997169	14.6145	0.69624	8.8e-05	0.54206	6.43306	2.76555	3	5	3.4259	0	0.991734	0.985875	0.000131893	0.000659465	ENSG00000240557	22722	18_Quiescent/low_signal	0	0	1	0	0	0	0	0	DBP|0|11.51882202672|4|+|-0.922539026720003|10.596283
rs7134911	12:30975205-30976356	12	30975469	C	A	0.394737	0.001437	0.961415	0.961415	14.9501	0.403641	0.00049	0.503665	42.0394	6.11259	5	6	0.419035	0	0.939071	0.842784	0.000110395	0.00066237	ENSG00000235884	27227	1_Active_TSS	1	0	0	1	1	1	0	0	AP-2_known3|0|-10.035023030112|3|-|12.750258022768|2.71523499265599
rs345973	4:140632734-140632950	4	140632858	T	C	0.342105	0.626168	0.975871	0.975871	12.8795	0.708042	8.4e-05	0.556052	6.70299	2.86429	2	2	0.264745	0	0.968407	0.958953	0.000332206	0.000664411	ENSG00000201533	-26153	6_Weak_transcription	0	0	0	0	0	1	1	1	Bach1|0|11.96610935299|10|+|-3.73684454805|8.22926480494
rs6814840	4:38190543-38191409	4	38191263	A	C	0.131579	1.81521	0.99931	0.99931	13.6325	0.352278	0.006567	0.512442	28.2349	4.37674	3	3	6.18306	0	0.993515	0.990014	0.000222302	0.000666907	ENSG00000221495	-49692	10_Active_enhancer_2	0	0	0	0	0	0	0	0	FXR_1|0|-2.32016285439002|6|-|5.31060775306202|2.990444898672
rs17773982	18:58119535-58119972	18	58119892	T	A	0.184211	0.294145	0.987941	0.987941	12.8657	0.281552	0.020652	0.321359	10.6624	3.61733	1	2	0	0	0.97887	0.97887	0.000334654	0.000669307	ENSG00000166603	-79534	18_Quiescent/low_signal	0	0	0	0	0	0	0	0	Bach2|0|-11.899010885872|3|+|12.242539712258|0.343528826386006
rs10035158	5:101922593-101922890	5	101922775	G	T	0.236842	0.006973	0.999564	0.999564	13.6091	0.657048	6.4e-05	0.495843	13.3935	3.66585	3	3	1.67426	0	0.992265	0.99377	0.000225094	0.000675283	ENSG00000205359	-87873	18_Quiescent/low_signal	0	0	0	0	0	0	1	0	Pax-1|0|11.966128656348|6|+|-36.460120685022|-24.493992028674
rs6985113	8:105698657-105698993	8	105698914	G	A	0.736842	0.655306	1	1	11.5437	0.674559	7.8e-05	0.647225	12.9564	3.87847	1	1	0	0	0.995428	0.995428	0.000679775	0.000679775	ENSG00000147650	-97437	17_Weak_repressed_polycomb	0	0	0	1	0	0	0	1	Bach1|0|11.96610935299|11|+|-1.31088056045999|10.65522879253
rs28416554	2:16234123-16234632	2	16234484	G	A	0.447368	1.23453	0.999894	0.999894	15.1803	0.383947	1.1e-05	0.499474	17.2258	4.37379	7	7	0.04639	0	0.994286	0.996701	9.77e-05	0.00068402	ENSG00000236989	11840	6_Weak_transcription	1	0	0	0	0	0	0	1	NA
rs11826594	11:123692876-123693246	11	123692923	T	A	0.342105	0.626168	0.999299	0.999299	11.5301	0.673348	0.000144	0.52165	12.1409	3.12317	1	1	0	0	0.995421	0.995421	0.000684766	0.000684766	ENSG00000196099	-15819	10_Active_enhancer_2	0	0	0	0	1	0	0	0	PRDM1_known1|0|10.79659007154|7|-|-4.73948636756|6.05710370398
rs3913103	12:58922900-58923362	12	58923265	A	G	0.447368	2.79807	0.999894	0.999894	11.5281	0.65497	5.3e-05	0.40646	23.1615	4.29728	2	1	0	0	0.994133	0.993433	0.000685527	0.000685527	ENSG00000241423	284674	6_Weak_transcription	1	0	0	0	0	0	0	0	Foxa_known2|0|0.391991836590009|3|-|10.93986855435|11.33186039094
rs2520494	4:149929616-149930078	4	149929686	C	T	0.236842	0.006973	1	1	12.8116	0.329365	5.7e-05	0.537371	19.2247	3.54066	2	2	1.4283	0	0.991857	0.994189	0.00034448	0.00068896	ENSG00000239168	-16831	18_Quiescent/low_signal	0	0	0	0	0	0	0	0	CTCF_disc9|0|-6.027831355304|16|-|12.210860604204|6.1830292489
rs111525611	20:24726802-24727297	20	24726944	C	A	0.263158	0.139592	0.9917	0.9917	14.532	0.324913	0.012674	0.39521	23.0439	3.36858	5	5	0.030732	0	0.975816	0.983407	0.0001378	0.000689001	ENSG00000231015	66618	10_Active_enhancer_2	0	0	0	0	0	0	0	0	EWSR1-FLI1|0|-11.95222402924|5|-|1.185395314018|-10.766828715222
rs2190087	7:139649390-139649824	7	139649561	A	G	0.842105	0.667969	1	1	12.8066	0.341978	2.9e-05	0.485039	15.8417	4.36533	3	2	3.95204	0	0.997144	0.990799	0.000345402	0.000690804	ENSG00000059378	114131	6_Weak_transcription	1	0	0	0	0	0	0	1	Mef2_known5|0|-5.59720968173198|9|-|-1.61205615405001|-7.20926583578199
rs2362747	14:77342437-77342817	14	77342652	C	G	0.526316	1.35111	0.997894	0.997894	13.5624	0.629875	3.3e-05	0.440096	17.7735	3.91997	3	3	6.36286	0	0.991681	0.991465	0.000230761	0.000692284	ENSG00000241081	10656	18_Quiescent/low_signal	0	1	0	1	0	1	1	0	Sox_2|0|6.838701183462|10|-|4.956595062562|11.795296246024
rs2525828	7:79509533-79510406	7	79510171	G	A	0.078947	0.139592	0.997475	0.997475	12.7936	0.308961	1.8e-05	0.616976	34.2293	4.90574	2	2	0	0	0.990278	0.982974	0.0003478	0.0006956	ENSG00000206818	31991	10_Active_enhancer_2	1	1	0	0	0	1	1	1	NA
rs56124163	15:85777065-85778485	15	85778485	T	G	0.578947	2.35783	0.860659	0.860659	11.5009	0.361353	0.000219	0.462881	15.454	4.46363	1	1	0	0	0.847713	0.847713	0.000695619	0.000695619	ENSG00000188388	-6639	2_Weak_TSS	0	0	0	0	1	1	0	0	PPAR_1|0|-11.159050847456|3|-|8.12032014584801|-3.03873070160799
rs72298225	9:123604802-123605823	9	123605711	CGAAGGCGTGAGTAATA	C	0.552632	0.554724	0.999362	0.999362	11.4741	0.397482	0.00306	0.490787	48.0338	6.13847	1	1	0	0	0.686081	0.991753	0.000705715	0.000705715	ENSG00000226752	-577	1_Active_TSS	1	1	0	0	1	1	0	0	AP-1_disc9|0|-24.294193841853|13|+|12.895460548538|-11.398733293315
rs12049898	11:99418978-99419656	11	99419286	G	T	0.078947	0.139592	0.950021	0.950021	14.0502	0.341186	0.003132	0.452661	31.2429	4.77623	4	4	2.04922	0	0.967947	0.921166	0.000177991	0.000711965	ENSG00000149972	-271286	10_Active_enhancer_2	1	1	0	0	1	1	1	0	NA
rs9917745	3:172086142-172086525	3	172086265	G	A	0.105263	0.262976	0.997228	0.997228	13.5084	0.717733	3.5e-05	0.601693	17.9989	3.72113	4	3	0.568352	0	0.996643	0.985173	0.000237494	0.000712481	ENSG00000203443	51923	10_Active_enhancer_2	0	1	0	0	0	1	1	0	AP-1_known4|0|11.966082453577|8|+|0.323272044551004|12.289354498128
rs12554679	9:94660865-94661409	9	94661115	G	A	0.236842	1.82996	0.955374	0.955374	12.7482	0.645817	0.002572	0.421381	18.7525	4.4175	4	2	3.11263	0	0.933714	0.920065	0.00035636	0.000712721	ENSG00000169071	51579	10_Active_enhancer_2	1	0	0	0	0	0	0	0	HEN1_1|0|11.966218239077|13|-|0.155942042166998|12.122160281244
rs7549012	1:147188929-147189565	1	147189273	A	G	0.236842	0.006973	0.961866	0.961866	12.7445	0.338915	2.5e-05	0.401338	25.6115	4.56611	2	2	0	0	0.95343	0.954465	0.000357058	0.000714116	ENSG00000227139	19014	10_Active_enhancer_2	1	0	0	0	1	1	0	1	GATA_disc4|0|-11.966228096882|6|+|13.598337552292|1.63210945541
rs7987644	13:113274170-113274510	13	113274195	G	A	0.789474	0.0475	0.988898	0.988898	13.4994	0.27398	0.000113	0.427647	11.6826	3.1686	3	3	0	0	0.993425	0.978162	0.000238645	0.000715936	ENSG00000245654	17027	17_Weak_repressed_polycomb	0	0	0	0	1	0	0	0	Gfi1_3|0|-11.938636298752|6|-|11.333561217792|-0.605075080959999
rs2136477	2:231877240-231877439	2	231877319	G	A	0.447368	0.033543	0.999894	0.999894	13.4987	0.293704	7.4e-05	0.337594	11.2437	2.6983	3	3	0	0	0.994164	0.994747	0.000238731	0.000716192	ENSG00000173699	16403	17_Weak_repressed_polycomb	1	0	0	0	0	0	0	0	Nkx6-1_1|0|-1.99532148214801|9|+|12.255044035123|10.259722552975
rs6794234	3:191013889-191014456	3	191014155	A	G	0.684211	0.902531	0.996747	0.996747	14.4547	0.29781	7.6e-05	0.382667	17.6878	3.47474	5	5	0.116259	0	0.992794	0.989292	0.000143569	0.000717847	ENSG00000152492	-32978	18_Quiescent/low_signal	1	0	0	0	0	0	0	0	LBP-9|0|-4.280404725342|3|-|11.827333580062|7.54692885472
rs3741054	11:107991906-107993125	11	107992312	C	G	0.184211	0.968783	0.998776	0.998776	14.0344	0.434781	0.001027	0.503369	49.5729	6.37058	4	4	1.4448	0	0.994899	0.991228	0.0001795	0.000717999	ENSG00000075239	-353	1_Active_TSS	0	0	0	0	1	1	0	0	NA
rs10466964	12:86033586-86033867	12	86033810	G	T	0.368421	0.172336	1	1	11.4321	0.700494	0.000351	0.557499	9.63418	2.76866	1	1	0.002802	0	0.993431	0.993431	0.000721853	0.000721853	ENSG00000198774	196732	18_Quiescent/low_signal	0	0	0	0	0	0	0	0	Maf_disc1|0|11.94719761284|4|+|-7.86992913114399|4.077268481696
rs3789139	4:121675056-121675607	4	121675253	T	A	0.078947	0.139592	0.997116	0.997116	12.7069	0.258963	0.002763	0.449781	14.8466	4.00049	2	2	0.08476	0	0.973855	0.983124	0.000364305	0.000728609	ENSG00000212359	-56569	6_Weak_transcription	1	0	0	0	1	1	1	1	p300_disc10|0|-11.966132289936|4|-|4.39802309161601|-7.56810919832
rs7007672	8:120919058-120919326	8	120919221	G	A	0.736842	0.139592	1	1	11.3989	0.269975	0.000132	0.259084	6.50785	3.28807	1	1	0	0	0.989361	0.989361	0.000734862	0.000734862	ENSG00000202356	-15589	6_Weak_transcription	0	0	0	0	0	0	0	0	BATF_disc3|0|-0.873985575029991|9|+|11.55422224297|10.68023666794
rs942447	1:64563702-64563874	1	64563850	C	G	0.421053	1.65857	0.999677	0.999677	14.4085	0.755559	0.000144	0.520955	7.42867	2.67086	4	5	0	0	0.98676	0.97718	0.00014714	0.000735702	ENSG00000200508	-31289	10_Active_enhancer_2	0	0	0	0	0	0	0	0	1
rs1123648	2:37232296-37232618	2	37232330	C	T	0.210526	1.35111	1	1	11.3884	0.287799	0.000107	0.332309	18.5425	2.74938	3	1	0	0	0.980116	0.988292	0.000739059	0.000739059	ENSG00000244927	-2210	6_Weak_transcription	0	0	0	1	1	0	0	0	RXRA_disc2|0|-4.62488531518801|2|+|10.837723126504|6.21283781131599
rs35680304	7:130973329-130973518	7	130973495	C	T	0.657895	3.27834	1	1	11.3833	0.37213	0.000128	0.471053	26.4678	3.57119	1	1	0	0	0.996038	0.996038	0.000741062	0.000741062	ENSG00000236753	39652	10_Active_enhancer_2	0	0	0	0	1	0	0	0	Pax-5_known1|0|-1.58395353882699|14|-|13.905968464491|12.322014925664
rs34467568	7:12150904-12151843	7	12151210	G	A	0.236842	0.006973	0.968157	0.968157	15.0251	0.627371	1.7e-05	0.523271	29.2559	5.02349	7	7	11.8828	0	0.979873	0.953332	0.000106091	0.000742639	ENSG00000106460	-99964	2_Weak_TSS	0	0	0	1	1	0	0	0	Ets_disc1|0|11.966273378226|4|-|-7.67026951799102|4.29600386023499
rs6731515	2:128848281-128849255	2	128848651	C	G	0.526316	0.058642	0.998318	0.998318	14.3826	0.552074	0.000624	0.521928	51.0425	6.01199	7	5	1.90626	0	0.968528	0.994412	0.000149172	0.000745861	ENSG00000136731	-494	1_Active_TSS	1	0	0	0	1	1	1	0	SP1_disc3|0|5.70299940642299|10|-|7.05713229022901|12.760131696652
rs2294253	1:168156379-168156738	1	168156627	C	T	0.447368	0.033543	1	1	12.6328	0.29392	0.000142	0.476237	10.6244	2.91368	2	2	0	0	0.991974	0.98965	0.000379029	0.000758058	ENSG00000143155	8207	6_Weak_transcription	1	1	0	0	0	0	1	0	1
rs2670192	10:80230382-80230729	10	80230626	G	A	0.552632	1.23453	1	1	13.3917	0.680554	4.3e-05	0.540731	12.76	3.67439	3	3	0.829349	0	0.964529	0.916707	0.000252737	0.000758211	ENSG00000241126	-58127	6_Weak_transcription	1	1	1	0	0	0	1	0	LXR_2|0|11.966084604428|11|-|4.71839958579399|16.684484190222
rs3924849	18:5431956-5432698	18	5432330	G	A	0.684211	4.99671	1	1	12.6203	0.397317	0.002868	0.484528	35.7509	5.04698	2	2	0	0	0.99503	0.996941	0.000381588	0.000763177	ENSG00000244836	39575	10_Active_enhancer_2	1	0	0	0	1	0	0	0	Mxi1_disc1|0|-4.46745344040001|3|+|13.01539710733|8.54794366693
rs3917493	7:94947863-94948428	7	94948028	T	C	0.131579	0.43618	1	1	14.3358	0.632379	2.1e-05	0.411062	19.3311	4.5634	5	5	14.6967	0	0.995022	0.989694	0.00015293	0.000764648	ENSG00000005421	6156	10_Active_enhancer_2	1	0	0	0	1	1	0	0	NA
rs12372856	14:33776919-33777628	14	33777142	A	G	0.394737	3.54395	1	1	12.6162	0.606474	6.2e-05	0.44548	20.5076	4.98514	2	2	-67.0091	0	0.991669	0.992665	0.000382411	0.000764821	ENSG00000151322	368469	10_Active_enhancer_2	1	0	0	0	1	1	1	0	Pbx3_disc2|0|5.243662660536|3|+|7.742300702314|12.98596336285
rs4690134	4:80927104-80927450	4	80927241	G	C	0.447368	1.23453	0.999576	0.999576	11.3226	0.674245	0.00026	0.661706	15.7867	2.90192	1	1	1.38932	0	0.994911	0.994911	0.000765686	0.000765686	ENSG00000222748	51155	18_Quiescent/low_signal	0	0	0	0	0	0	0	0	NA
rs2302535	7:55154011-55154949	7	55154688	A	C	0.315789	0.012492	0.994655	0.994655	14.9587	0.371052	0.001413	0.43589	21.0676	4.79834	6	7	0	0	0.987822	0.973062	0.000109888	0.000769218	ENSG00000146648	67296	2_Weak_TSS	1	0	0	0	1	0	0	1	Nrf1_known2|0|-11.966182743176|10|-|11.90282583598|-0.0633569071960096
rs3112276	3:125485072-125486113	3	125485074	G	A	0.684211	0.012492	0.700538	0.700538	13.3623	0.252471	3.9e-05	0.458164	21.0376	4.82939	7	3	4.37776	0	0.417675	0.321464	0.000256731	0.000770192	ENSG00000239432	10142	17_Weak_repressed_polycomb	0	0	0	1	1	0	0	0	NA
rs2947365	8:12793776-12794401	8	12794278	A	G	0.710526	2.46609	0.999872	0.999872	14.3208	0.636675	1.5e-05	0.605903	13.736	4.28024	7	5	2.20495	0	0.995088	0.996009	0.00015415	0.000770749	ENSG00000170941	-9408	10_Active_enhancer_2	1	1	1	0	1	1	1	1	Mef2_disc1|0|1.82690516581999|4|-|11.80504991385|13.63195507967
rs1385974	8:50754623-50755472	8	50755031	C	A	0.710526	7.21345	1	1	13.3578	0.398247	2.5e-05	0.570875	28.7445	4.71595	3	3	1.54439	0	0.997075	0.996959	0.000257347	0.00077204	ENSG00000199640	511853	10_Active_enhancer_2	0	0	1	0	1	1	0	0	GR_disc4|0|-5.26279670739899|9|+|9.76713847986899|4.50434177247
rs11116485	12:84993085-84993663	12	84993439	G	A	0.184211	0.968783	1	1	13.8906	0.603144	0.003011	0.541365	28.085	4.76748	4	4	0	0	0.992933	0.991451	0.000193768	0.000775072	ENSG00000222637	294720	18_Quiescent/low_signal	0	1	0	0	0	0	1	0	Pou5f1_known1|0|7.962432429|9|-|3.35662840043999|11.31906082944
rs10490898	10:28858582-28859205	10	28858889	C	T	0.210526	1.35111	1	1	13.8742	0.604656	0.004517	0.534677	25.9513	4.60384	4	4	9.28228	0	0.989839	0.991611	0.000195468	0.000781873	ENSG00000095787	37159	6_Weak_transcription	1	0	0	0	0	0	0	1	NA
rs879710	2:113716178-113716641	2	113716222	T	G	0.447368	1.23453	1	1	13.8731	0.620193	3.5e-05	0.526644	29.6116	3.9408	5	4	0.024098	0	0.994171	0.996365	0.000195577	0.000782308	ENSG00000136688	-14603	17_Weak_repressed_polycomb	0	0	0	1	0	0	0	0	GR_disc2|0|10.804616207012|2|+|2.900673988256|13.705290195268
rs10813006	9:29145162-29145385	9	29145265	G	C	0.184211	0.294145	0.943462	0.943462	11.2797	0.686273	5.5e-05	0.540704	24.312	3.52951	2	1	0	0	0.888066	0.880454	0.000783571	0.000783571	ENSG00000230276	109261	18_Quiescent/low_signal	1	1	0	0	0	0	1	0	TAL1_known2|0|7.73238467784|6|+|3.311844583414|11.044229261254
rs12810260	12:131471644-131472282	12	131472216	T	A	0.078947	0.139592	0.999638	0.999638	15.1688	0.254541	0.00079	0.378655	16.917	4.14423	10	8	0.223348	0	0.98859	0.87677	9.83e-05	0.000786514	ENSG00000111452	33191	10_Active_enhancer_2	1	0	0	0	1	1	1	0	Foxj1_2|0|-0.347263987980995|2|-|11.676009445395|11.328745457414
rs60205880	1:159791368-159791536	1	159791464	G	C	0.236842	1.40601	0.9872	0.9872	11.2614	0.694792	3.9e-05	0.635629	9.00325	3.08239	2	1	0	0	0.783045	0.878163	0.000791348	0.000791348	ENSG00000158714	-5173	6_Weak_transcription	0	0	0	1	1	0	0	0	1
rs67365608	11:98501423-98502104	11	98501778	T	G	0.184211	0.968783	0.998252	0.998252	13.3106	0.641151	4.3e-05	0.501371	31.4594	4.65599	3	3	0	0	0.989964	0.9901	0.000263911	0.000791734	ENSG00000223269	-489484	10_Active_enhancer_2	1	1	0	0	0	0	1	0	NA
rs139711955	10:23794834-23795342	10	23795335	TAAAAC	T	0.394737	0.85067	0.99989	0.99989	13.8409	0.296085	0.004136	0.489956	18.3567	3.38389	5	4	1.13619	0	0.98283	0.948308	0.000198954	0.000795818	ENSG00000165312	66635	10_Active_enhancer_2	1	0	0	0	1	0	0	0	Mef2_known5|0|-3.77969648484799|10|+|3.68553415484001|-0.0941623300079755
rs2208774	14:44369420-44369875	14	44369532	G	A	0.447368	0.033543	1	1	11.2496	0.660271	0.000186	0.622226	16.2562	3.49857	1	1	0	0	0.995473	0.995473	0.000796406	0.000796406	ENSG00000237067	-358590	18_Quiescent/low_signal	0	0	0	0	1	0	0	1	Foxj2_1|0|11.96608830736|8|-|-0.339692744472003|11.626395562888
rs171130	20:47846438-47847236	20	47846586	T	C	0.631579	2.42347	1	1	13.2956	0.682193	5.1e-05	0.501831	11.1498	3.89899	3	3	0	0	0.992358	0.991263	0.000266028	0.000798084	ENSG00000124228	10553	10_Active_enhancer_2	1	1	1	1	1	1	1	0	ELF1_disc1|0|11.966129046248|6|+|-1.15019808914001|10.815930957108
rs7017785	8:17693736-17693930	8	17693844	T	C	0.631579	0.172336	0.999774	0.999774	12.5341	0.723698	0.000179	0.552127	7.14357	2.38353	2	2	0	0	0.994185	0.994357	0.000399597	0.000799194	ENSG00000129422	-35310	18_Quiescent/low_signal	1	1	0	0	0	0	1	1	Foxa_known4|0|10.266557431368|1|-|2.33307588778|12.599633319148
rs73896892	20:12651037-12651339	20	12651284	C	G	0.052632	0.058642	1	1	13.2856	0.74883	5.9e-05	0.5805	19.1049	3.37535	3	3	0.088005	0	0.827051	0.972197	0.000267451	0.000802354	ENSG00000223307	-36027	18_Quiescent/low_signal	0	0	0	0	1	0	0	0	Ncx_2|0|1.253970288634|14|+|10.750132569799|12.004102858433
rs10899314	11:76631013-76631529	11	76631298	T	A	0.526316	2.55444	0.996427	0.996427	13.8218	0.387133	0.002492	0.481943	19.1657	4.81868	4	4	0	0	0.994326	0.995542	0.000200986	0.000803945	ENSG00000212030	41736	10_Active_enhancer_2	1	1	1	1	1	0	1	1	SMC3_disc1|0|-4.60839772344001|4|-|11.02809839304|6.41970066959999
rs4679370	3:124919524-124920137	3	124919777	T	C	0.342105	0.051986	0.999766	0.999766	13.281	0.35035	2.5e-05	0.637374	23.1956	3.70165	3	3	0	0	0.988455	0.995012	0.000268109	0.000804328	ENSG00000221955	12184	10_Active_enhancer_2	1	0	0	0	1	1	0	1	HNF1_6|0|-1.32008861316|18|+|11.42628797976|10.1061993666
rs2634952	4:169372607-169373391	4	169373051	C	T	0.815789	0.968783	1	1	12.517	0.708831	2.5e-05	0.475027	17.9945	4.50983	2	2	0.153167	0	0.987058	0.991449	0.000403267	0.000806534	ENSG00000207171	-19954	6_Weak_transcription	1	1	0	0	0	1	1	0	BCL_disc2|0|11.96613822636|2|+|-0.157766176570007|11.80837204979
rs35042875	4:156550082-156550976	4	156550558	A	G	0.342105	5.1376	0.962458	0.962458	15.3433	0.653789	8e-06	0.628963	16.4312	4.72597	9	9	0	0	0.966968	0.8723	8.96e-05	0.000806726	ENSG00000164116	-37781	6_Weak_transcription	1	0	0	0	1	0	1	1	NA
rs11962999	6:74276477-74277257	6	74276935	G	A	0.421053	2.35783	0.999569	0.999569	13.2705	0.640557	2.1e-05	0.531608	12.1478	4.61275	3	3	8.5154	0	0.995126	0.996786	0.00026962	0.00080886	ENSG00000223967	-39875	1_Active_TSS	1	0	0	0	1	1	0	0	ZNF263_disc1|0|4.902069323125|8|+|7.03308652789499|11.93515585102
rs59226213	2:182460959-182461302	2	182461174	C	T	0.131579	0.43618	0.99977	0.99977	11.2176	0.322224	3e-05	0.409882	37.1895	4.1102	1	1	0	0	0.989754	0.989754	0.000810248	0.000810248	ENSG00000188452	84433	10_Active_enhancer_2	1	1	0	0	0	0	1	0	HNF4_disc4|0|-11.96609746566|2|-|11.437294100844|-0.528803364816
rs79468456	5:95198383-95198914	5	95198620	C	A	0.052632	0.058642	1	1	11.2023	0.293694	0.004626	0.423692	33.5463	5.55165	1	1	0	0	0.979097	0.979097	0.000816968	0.000816968	ENSG00000236882	10446	10_Active_enhancer_2	1	1	0	0	0	1	1	1	MIF-1|0|-11.966186889734|15|+|8.51384311252099|-3.452343777213
rs784933	9:116436068-116436325	9	116436086	T	C	0.473684	2.55444	0.950145	0.950145	13.2481	0.262345	0.015885	0.280893	3.85965	3.15561	3	3	0	0	0.925688	0.921123	0.000272852	0.000818557	ENSG00000227482	22831	11_Weak_enhancer	0	0	0	0	0	0	0	0	NA
rs6960988	7:25285827-25286300	7	25285998	T	G	0.421053	0.120222	0.999892	0.999892	13.2385	0.310971	0.000123	0.323579	10.1487	3.26346	3	3	0	0	0.990885	0.992983	0.000274252	0.000822757	ENSG00000105954	-17722	18_Quiescent/low_signal	0	0	0	0	0	0	0	0	Foxc1_1|0|-11.966106118866|5|+|11.143541186307|-0.822564932559004
rs111710459	6:166247843-166248644	6	166248221	TG	T	0.368421	0.172336	0.999209	0.999209	12.4777	0.360849	1.2e-05	0.418921	21.5247	5.35842	3	2	0	0	0.997348	0.992912	0.000411847	0.000823693	ENSG00000223942	-59169	11_Weak_enhancer	1	0	1	0	0	0	1	0	CTCF_disc4|0|-21.73369741046|12|+|12.86517999165|-8.86851741881
rs71565415	8:75746867-75747290	8	75747247	A	ACTG	0.447368	0.554724	0.998512	0.998512	12.4749	0.244788	0.01	0.5	8.16189	3.98726	0	2	0	0	1	0.990132	0.00041246	0.00082492	ENSG00000137558	10094	18_Quiescent/low_signal	0	0	0	0	0	0	0	0	NA
rs356968	6:29973932-29975380	6	29975047	G	T	0.263158	0.655306	1	1	16.4951	0.385687	0.00274	0.477802	28.7331	4.89845	16	17	6.81375	0	0.971567	0.99538	4.88e-05	0.000829211	ENSG00000237669	961	1_Active_TSS	0	0	0	0	1	1	0	0	INSM1|0|-11.966198569466|9|+|12.993866246991|1.02766767752499
rs73992955	2:231764016-231764413	2	231764163	G	A	0.105263	0.262976	1	1	11.1665	0.26623	0.000121	0.257747	15.9618	3.37923	1	1	0.584157	0	0.983236	0.983236	0.000832879	0.000832879	ENSG00000230385	-9552	10_Active_enhancer_2	0	0	1	0	1	0	0	1	RFX5_known3|0|-1.16838241897|16|-|13.873202285749|12.704819866779
rs2017299	6:129809627-129809908	6	129809767	G	A	0.684211	0.902531	0.963725	0.963725	11.1638	0.698493	0.000139	0.582764	12.7992	3.43087	1	1	0	0	0.927229	0.927229	0.000834101	0.000834101	ENSG00000212320	5007	17_Weak_repressed_polycomb	1	1	0	0	0	0	1	0	Foxc1_1|0|11.966106118866|5|-|-4.40365838520501|7.562447733661
rs267944	5:10747979-10748566	5	10748231	C	T	0.842105	0.824653	0.999802	0.999802	13.2058	0.697708	0.004236	0.614812	13.0502	4.24477	2	3	0	0	0.988207	0.987749	0.000279086	0.000837259	ENSG00000245760	3377	9_Active_enhancer_1	0	0	1	0	0	0	0	0	HNF1_3|0|11.118508383708|7|+|8.63985397807299|19.758362361781
rs2841526	6:13522978-13523141	6	13523043	G	A	0.736842	2.42347	1	1	11.1502	0.717092	0.000182	0.699447	14.4649	3.15575	1	1	0	0	0.989154	0.989154	0.000840204	0.000840204	ENSG00000218265	1479	6_Weak_transcription	0	0	0	0	0	0	0	0	AP-1_known4|0|11.96616924671|8|+|0.140746085852001|12.106915332562
rs705379	7:94953516-94954242	7	94953895	G	A	0.526316	1.35111	0.999578	0.999578	12.4369	0.337918	0.001337	0.311619	13.9161	4.23917	4	2	0	0	0.984675	0.95379	0.00042094	0.000841879	ENSG00000005421	503	6_Weak_transcription	0	0	0	0	1	0	0	0	SP2_disc3|0|-11.96614313307|7|-|7.46680686693001|-4.49933626613999
rs10790008	11:114283577-114283843	11	114283628	C	A	0.447368	1.23453	0.998627	0.998627	11.1439	0.658986	0.00021	0.585128	14.4876	3.21619	1	1	0	0	0.994782	0.994782	0.000843099	0.000843099	ENSG00000076053	12238	6_Weak_transcription	1	0	0	0	0	1	0	1	NA
rs1451174	4:66257305-66257939	4	66257892	G	C	0.578947	0.353306	1	1	13.1792	0.335458	3.7e-05	0.619673	15.757	4.06426	3	3	4.26806	0	0.986833	0.98445	0.000283073	0.000849219	ENSG00000243199	-181873	18_Quiescent/low_signal	1	0	0	0	0	0	0	0	GR_known6|0|-1.261760145336|3|+|10.368451937928|9.106691792592
rs9345123	6:91986043-91986294	6	91986228	G	C	0.315789	0.902531	0.999878	0.999878	11.1188	0.647513	7.7e-05	0.617391	23.8823	3.50889	1	1	0.032441	0	0.981144	0.981144	0.00085456	0.00085456	ENSG00000224605	116675	18_Quiescent/low_signal	0	0	0	1	0	0	0	0	ATF3_known3|0|11.966127667668|6|-|-11.258684452911|0.707443214757006
rs4801541	19:58520725-58521487	19	58521224	G	C	0.447368	1.23453	0.998936	0.998936	13.6969	0.401635	0.000905	0.55398	28.7793	4.72353	5	4	0	0	0.974467	0.996306	0.000214806	0.000859222	ENSG00000244877	526	1_Active_TSS	0	0	0	0	1	1	0	0	Nanog_disc3|0|-1.103198842392|8|+|11.59672319884|10.493524356448
rs34011746	8:89911136-89911887	8	89911209	C	T	0.368421	1.96301	0.999548	0.999548	14.1096	0.346501	3.6e-05	0.520738	9.31152	3.67283	4	5	0.107746	0	0.995139	0.994791	0.00017246	0.000862299	ENSG00000242987	-502360	18_Quiescent/low_signal	0	0	0	0	0	0	0	0	Rad21_disc8|0|-10.601929968015|2|-|12.158882427995|1.55695245998
rs74065410	12:10095846-10096332	12	10096010	G	C	0.105263	0.262976	0.993055	0.993055	12.3894	0.746036	5.4e-05	0.594893	20.4063	3.70103	3	2	0	0	0.970084	0.98206	0.00043177	0.000863539	ENSG00000225231	248	17_Weak_repressed_polycomb	0	0	0	0	0	0	0	0	TAL1_known2|0|0.382921297652004|2|+|12.511293016068|12.89421431372
rs1992861	3:134400120-134400282	3	134400122	T	G	0.368421	0.172336	1	1	12.3762	0.285873	0.000142	0.459858	3.51488	2.76746	2	2	0.103923	0	0.992581	0.993818	0.000434846	0.000869692	ENSG00000174611	-29642	17_Weak_repressed_polycomb	0	0	0	0	0	0	0	0	RFX5_known3|0|-11.873084453698|13|-|15.306902831819|3.433818378121
rs79602490	1:75811304-75812142	1	75811837	C	T	0.052632	0.058642	0.999473	0.999473	12.3643	0.666147	5.6e-05	0.345869	27.0063	5.07225	2	2	5.35819	0	0.990174	0.978587	0.000437633	0.000875266	ENSG00000206999	162573	6_Weak_transcription	0	0	0	0	1	1	1	0	p300_disc2|0|10.210653571258|5|+|1.430092130559|11.640745701817
rs9648604	7:7349749-7349999	7	7349846	A	G	0.368421	0.172336	1	1	12.361	0.70981	0.000105	0.598261	13.1391	2.66765	2	2	0.005881	0	0.965438	0.941244	0.000438397	0.000876793	ENSG00000236712	16609	18_Quiescent/low_signal	1	0	0	0	1	0	0	0	RXRA_known1|0|2.80169398729498|19|-|-5.17987861804099|-2.37818463074601
rs200785720	18:74258024-74258185	18	74258137	T	T	0.763158	0.006973	0.957843	0.957843	11.069	0.766119	0.01	0.5	8.33753	2.43243	0	1	0	0	1	0.918337	0.000877808	0.000877808	ENSG00000247544	17411	18_Quiescent/low_signal	1	0	0	0	1	0	0	0	NA
rs72830243	2:51393004-51393306	2	51393286	A	G	0.131579	1.81521	0.998849	0.998849	11.0689	0.287602	0.000131	0.491028	11.7138	3.24616	1	1	0	0	0.991241	0.991241	0.000877885	0.000877885	ENSG00000237374	55898	18_Quiescent/low_signal	1	0	0	0	1	0	0	0	Myf_1|0|-11.288244716178|5|+|9.52820141613999|-1.76004330003801
rs73048332	7:4175371-4176260	7	4175889	A	G	0.105263	0.262976	0.999721	0.999721	14.4156	0.324437	1e-05	0.53685	20.5365	4.72513	6	6	13.3386	0	0.993171	0.988066	0.000146583	0.000879497	ENSG00000236510	-491955	10_Active_enhancer_2	1	0	0	1	1	1	1	1	Znf143_known1|0|-10.644654678346|16|+|10.807633312079|0.16297863373299
rs6452430	5:81123259-81123745	5	81123574	A	G	0.289474	2.46609	0.999872	0.999872	11.0606	0.355372	4.1e-05	0.343063	10.7077	4.33715	2	1	0.905723	0	0.99387	0.995601	0.000881824	0.000881824	ENSG00000214857	-65052	10_Active_enhancer_2	0	1	0	0	0	0	1	0	AP-1_disc4|0|-11.966092434212|1|+|5.711868338374|-6.25422409583798
rs2859824	6:151814676-151816059	6	151815865	C	A	0.157895	0.667969	0.972044	0.972044	14.0627	0.61369	0.002355	0.617017	41.8282	5.2977	3	5	0.000802	0	0.978276	0.95785	0.000176816	0.000884078	ENSG00000120262	-500	1_Active_TSS	0	0	0	0	1	1	0	0	NA
rs2136207	5:115490396-115491003	5	115490709	C	T	0.236842	1.82996	1	1	14.6931	0.664164	2.3e-05	0.515002	19.9453	4.08648	5	7	4.23352	0	0.989268	0.960077	0.000126507	0.000885551	ENSG00000212457	33853	6_Weak_transcription	1	1	0	0	0	0	0	0	Pax-4_5|0|3.992922099979|3|-|7.210207310271|11.20312941025
rs35517488	7:113361981-113362541	7	113362256	C	T	0.578947	0.353306	0.995916	0.995916	11.0496	0.347847	6.7e-05	0.467771	14.7104	4.34827	1	1	0.053832	0	0.992203	0.992203	0.000887068	0.000887068	ENSG00000232774	-223228	18_Quiescent/low_signal	1	1	0	0	0	0	1	1	NF-E2_disc4|0|-11.339791463616|9|+|11.234272711728|-0.105518751887999
rs10978594	9:99448921-99449641	9	99449290	C	T	0.105263	0.262976	0.996113	0.996113	11.0386	0.334808	0.004075	0.466924	36.9138	4.87392	1	1	0	0	0.984175	0.984175	0.00089232	0.00089232	ENSG00000224848	-418	1_Active_TSS	0	1	0	1	1	1	0	0	CCNT2_disc2|0|-4.84662052962001|4|+|11.50367244204|6.65705191242
rs781914	3:191193944-191194650	3	191194373	T	A	0.789474	2.55444	0.870148	0.870148	11.0372	0.650223	0.000281	0.706143	26.902	3.55989	1	1	0	0	0.821854	0.821854	0.000893035	0.000893035	ENSG00000221856	14991	18_Quiescent/low_signal	0	1	0	0	0	0	1	0	BATF_disc3|0|11.96615033878|6|+|-5.84374192852999|6.12240841025
rs34101249	16:90148285-90148996	16	90148721	G	T	0.105263	0.262976	0.93877	0.93877	12.3261	0.325076	0.00157	0.375645	29.7196	4.44889	5	2	0.223614	0	0.947727	0.911396	0.00044667	0.000893341	ENSG00000126856	-5947	10_Active_enhancer_2	1	0	0	1	1	1	0	0	p300_disc2|0|-0.251386543521988|15|-|11.57577966803|11.324393124508
rs72990918	18:74779301-74779942	18	74779490	A	G	0.131579	0.43618	1	1	13.0832	0.360716	0.002604	0.559337	20.4895	4.60582	8	3	1.16476	0	0.965541	0.989048	0.00029796	0.000893879	ENSG00000245040	-40957	9_Active_enhancer_1	0	0	0	0	0	1	0	0	AP-1_disc8|0|-11.966181289892|8|-|5.89225417677099|-6.073927113121
rs6894065	5:124947954-124948781	5	124948325	G	A	0.263158	0.655306	0.977245	0.977245	13.0764	0.624748	0.001364	0.60926	18.5532	4.96269	4	3	0	0	0.956862	0.90052	0.000299043	0.000897129	ENSG00000222107	-261130	18_Quiescent/low_signal	1	1	0	0	1	1	1	0	NA
rs66559842	7:66237846-66238333	7	66238069	TG	T	0.526316	0.058642	0.966333	0.966333	14.3773	0.345268	0.040916	0.484363	14.7161	3.94578	4	6	0.00814	0	0.847753	0.941259	0.000149597	0.000897581	ENSG00000231891	-17039	10_Active_enhancer_2	1	0	0	0	0	0	1	1	Foxp1|0|-5.74500550086|6|+|3.22938994218001|-2.51561555868
rs2613209	8:95246459-95247062	8	95246735	C	T	0.105263	3.6981	1	1	13.0688	0.332497	2.2e-05	0.551346	32.9933	3.85412	3	3	1.96325	0	0.96832	0.992126	0.000300263	0.00090079	ENSG00000079112	-16928	1_Active_TSS	0	0	0	0	1	1	0	0	Hoxb13|0|-0.568941855830005|16|-|11.94316732547|11.37422546964
rs2763027	6:152529316-152529987	6	152529723	A	G	0.789474	2.55444	1	1	11.0137	0.376994	3.2e-05	0.414628	24.2602	4.94824	1	1	0	0	0.995603	0.995603	0.000904396	0.000904396	ENSG00000242050	81852	10_Active_enhancer_2	1	1	0	0	0	1	1	1	CTCF_disc1|0|-11.260032362136|13|+|11.705062736919|0.445030374783002
rs671307	11:78523717-78524520	11	78524245	A	G	0.631579	1.96301	1	1	11.0093	0.403342	5.3e-05	0.414955	35.159	5.10997	1	1	0	0	0.996739	0.996739	0.000906534	0.000906534	ENSG00000242090	-233317	10_Active_enhancer_2	0	1	0	1	0	1	0	1	Foxd1_1|0|-11.966138526682|7|-|9.466516655514|-2.499621871168
rs11813798	10:52020580-52021144	10	52020743	G	A	0.210526	1.35111	1	1	14.6389	0.32105	0.006604	0.505418	7.55303	3.39465	6	7	-6.3e-05	0	0.98895	0.988531	0.000130198	0.000911388	ENSG00000225137	-4159	18_Quiescent/low_signal	1	0	0	0	0	0	0	0	SREBP_known1|0|-11.676768861996|8|-|12.51890067084|0.842131808844002
rs477402	11:78920619-78920905	11	78920825	T	C	0.868421	1.81521	1	1	13.0456	0.674032	3.5e-05	0.528892	13.7767	2.89133	3	3	7.25043	0	0.996966	0.991615	0.000304004	0.000912012	ENSG00000211997	192534	18_Quiescent/low_signal	0	0	0	0	0	0	0	1	Maf_disc2|0|4.489168608528|9|-|9.62637899611201|14.11554760464
rs9972429	15:49763967-49764376	15	49764132	A	C	0.289474	0.43618	0.998468	0.998468	10.9958	0.697368	0.035893	0.591986	12.7857	3.08588	1	1	0	0	0.99018	0.99018	0.000913203	0.000913203	ENSG00000140285	48591	2_Weak_TSS	1	0	0	0	1	0	0	1	Pax-1|0|11.966128656348|12|-|-38.136864745694|-26.170736089346
rs10904513	10:5530333-5531043	10	5530395	G	A	0.5	2.57895	0.998849	0.998849	13.0242	0.343313	9.4e-05	0.586273	9.31794	3.69794	3	3	9.10309	0	0.985863	0.987562	0.000307498	0.000922493	ENSG00000178372	11177	18_Quiescent/low_signal	0	0	0	0	0	0	0	0	TATA_disc4|0|-11.966179437175|3|+|12.533814768265|0.567635331089988
NA	2:232378840-232379615	2	232379230	A	A	0.289474	3.15363	0.992664	0.992664	14.3	0.36433	0.003429	0.538522	9.31324	6.02134	7	6	16.5783	0	0.977312	0.965829	0.000155865	0.00093519	ENSG00000181798	210	1_Active_TSS	0	0	0	0	1	1	0	0	NA
rs3746886	21:40684947-40686427	21	40685598	G	A	0.947368	0.058642	0.744215	0.744215	15.8965	0.601912	9e-06	0.505058	52.5948	6.01565	13	14	2.74761	0	0.972926	0.408086	6.69e-05	0.000936648	ENSG00000245629	-941	2_Weak_TSS	0	1	0	1	1	1	0	0	NA
rs2567230	6:7909836-7911546	6	7910435	T	C	0.526316	4.33716	0.999475	0.999475	14.277	0.410669	0.002184	0.519381	27.1251	6.05125	8	6	1.28165	0	0.983751	0.991519	0.00015778	0.000946681	ENSG00000239264	1211	1_Active_TSS	0	0	0	0	1	1	0	1	NA
rs73935655	19:54040689-54042004	19	54041740	C	T	0.105263	0.262976	0.994711	0.994711	16.0046	0.2162	0.001177	0.484141	0.777158	4.66832	14	15	64.7274	0	0.922953	0.88923	6.32e-05	0.000947822	ENSG00000245813	-14315	1_Active_TSS	0	0	0	1	1	1	0	0	NRSF_known1|0|-11.74381714358|8|+|10.67220835042|-1.07160879316001
rs941529	1:1840123-1841116	1	1840606	G	A	0.157895	0.667969	0.993708	0.993708	12.9726	0.368745	0.006283	0.611345	23.6662	5.29983	3	3	1.81895	0	0.948474	0.9846	0.000316082	0.000948246	ENSG00000169885	-6144	1_Active_TSS	0	0	0	1	1	1	0	0	ATF3_disc4|0|-3.69665796917201|2|+|11.445547355934|7.748889386762
rs12495758	3:85553408-85554586	3	85554262	G	A	0.552632	0.554724	0.996208	0.996208	14.5611	0.354737	0.009985	0.312679	14.3936	4.51721	6	7	0.470139	0	0.991196	0.988619	0.00013569	0.00094983	ENSG00000241648	323792	18_Quiescent/low_signal	0	0	0	0	0	0	0	0	Myc_disc10|0|-11.389210397311|4|+|10.64980341557|-0.739406981741006
rs138736030	2:229291348-229291543	2	229291377	AAAAC	A	0.447368	2.79807	0.999787	0.999787	12.9534	0.263376	0.000136	0.55535	7.6213	2.40208	2	3	0.322934	0	0.99225	0.988817	0.000319342	0.000958025	ENSG00000203387	-73417	18_Quiescent/low_signal	1	0	0	0	0	0	0	0	Foxd3|0|-16.487521299936|13|-|15.650101444752|-0.837419855183995
rs184439363	10:21455670-21456352	10	21456035	G	A	0.078947	0.139592	0.882223	0.882223	13.4864	0.634664	7e-06	0.522075	37.6857	5.16765	7	4	3.72484	0	0.989151	0.832433	0.000240294	0.000961176	ENSG00000231920	-7274	1_Active_TSS	1	1	0	0	1	1	0	1	AP-1_known4|0|11.96616924671|8|+|0.130938461823007|12.097107708533
rs142165087	5:35229436-35230820	5	35230302	G	C	0.052632	0.058642	0.999473	0.999473	14.7858	0.34062	0.000749	0.436702	50.0171	5.58151	8	8	0.799346	0	0.986428	0.977779	0.000120438	0.0009635	ENSG00000113494	1358	2_Weak_TSS	0	0	0	1	1	1	0	1	NRSF_known2|0|-0.999325925047998|15|+|-6.44200710022398|-7.44133302527197
rs4472352	6:57887534-57887703	6	57887607	C	G	0.552632	2.79807	0.912617	0.912617	10.8928	0.724895	0.000193	0.581644	10.9721	2.76759	1	1	0.009307	0	0.74861	0.74861	0.000965406	0.000965406	ENSG00000215307	-45144	18_Quiescent/low_signal	0	0	0	0	0	0	0	0	Bach1|0|11.96622056942|6|+|-2.73367234944999|9.23254821997
rs55783650	3:20163398-20163831	3	20163655	A	G	0.473684	0.459753	0.984804	0.984804	13.8828	0.68743	0.001438	0.667472	8.69048	3.04414	5	5	0	0	0.935243	0.976002	0.00019457	0.000972851	ENSG00000245306	-46539	6_Weak_transcription	1	0	0	0	0	0	0	0	NA
rs1417103	1:78799031-78799689	1	78799291	G	A	0.921053	0.139592	0.953644	0.953644	12.162	0.697942	1.4e-05	0.588015	29.948	3.74733	4	2	0	0	0.973015	0.935245	0.000487721	0.000975442	ENSG00000227556	-16084	17_Weak_repressed_polycomb	1	0	0	1	0	0	0	0	Spz1_2|0|11.381397696068|6|+|0.961906558771986|12.34330425484
rs76489218	2:153573547-153575642	2	153574150	G	A	0.105263	0.262976	0.97755	0.97755	13.4509	0.574527	0.000827	0.542022	54.3673	7.78742	5	4	13.3084	0	0.994545	0.963494	0.000244894	0.000979577	ENSG00000177917	-861	1_Active_TSS	0	1	0	1	1	1	0	0	CACD_1|0|10.744252497024|8|+|-0.358793831040003|10.385458665984
rs2156407	21:37447538-37447813	21	37447711	A	G	0.657895	0.626168	0.997344	0.997344	10.8634	0.276964	0.000222	0.466628	4.5951	3.13267	1	1	0	0	0.992303	0.992303	0.000980858	0.000980858	ENSG00000230212	362	6_Weak_transcription	0	0	0	0	0	0	0	1	RFX5_known4|0|-6.39484901549999|6|-|14.44835721025|8.05350819475001
rs376458584	17:18966728-18967424	17	18967372	G	T	0.710526	0.43618	0.774255	0.774255	12.9084	0.350439	0.021547	0.39583	2.70864	4.44472	8	3	-6e-06	0	0.561197	0.559565	0.000327115	0.000981345	ENSG00000201750	721	10_Active_enhancer_2	1	1	0	0	0	1	1	0	NA
rs199818102	1:228770804-228771446	1	228771365	A	G	0.342105	0.051986	0.779647	0.779647	12.1376	0.681393	0.024226	0.26659	5.78762	3.91172	4	2	5.18626	0	0.59226	0.671359	0.000494152	0.000988304	ENSG00000199270	-68	18_Quiescent/low_signal	0	1	0	0	1	0	0	0	1
rs76479425	12:96657163-96657797	12	96657431	C	A	0.052632	0.058642	0.998421	0.998421	13.428	0.323822	1e-05	0.502869	18.8858	4.15752	4	4	4.54041	0	0.996343	0.977802	0.000247899	0.000991596	ENSG00000247557	-14880	6_Weak_transcription	1	1	0	0	0	0	1	0	Rad21_disc8|0|-11.35130253399|6|+|12.17467293962|0.823370405630001
rs76075760	21:40554865-40556097	21	40555609	T	C	0.131579	0.43618	0.997478	0.997478	14.9533	0.432134	0.002524	0.471959	56.1274	6.5015	9	9	5.8912	0	0.951134	0.987866	0.000110205	0.000991849	ENSG00000247791	-254	1_Active_TSS	0	0	0	0	1	1	0	0	UF1H3BETA|0|-9.797450989704|2|+|0.089018131399996|-9.70843285830401
rs79892424	10:28109101-28109841	10	28109350	G	C	0.236842	0.006973	0.990907	0.990907	10.8393	0.336139	6e-05	0.469096	28.0064	4.07432	1	1	0	0	0.982663	0.982663	0.000993668	0.000993668	ENSG00000240261	-36144	17_Weak_repressed_polycomb	1	0	1	0	0	0	0	0	SP1_disc1|0|-0.0661212768060011|17|+|13.335133595734|13.269012318928
rs7069076	10:17248166-17248925	10	17248524	T	A	0.763158	0.006973	0.934777	0.934777	15.145	0.598441	0.000754	0.483699	30.2266	5.50949	9	10	0.466433	0	0.97537	0.857303	9.96e-05	0.000995602	ENSG00000107614	-4096	10_Active_enhancer_2	1	0	0	0	1	1	0	0	NF-E2_disc2|0|8.32637639792101|6|+|1.717851303424|10.044227701345
rs4942167	13:43451068-43451693	13	43451532	T	C	0.868421	0.43618	0.994775	0.994775	14.1751	0.341617	0.002234	0.479565	19.9998	4.17557	6	6	6.98741	0	0.952827	0.98416	0.000166559	0.000999356	ENSG00000229546	-34045	18_Quiescent/low_signal	1	0	0	0	0	0	1	0	GR_known4|0|-2.26088182538599|17|+|11.727618391996|9.46673656661
rs3113179	7:67778848-67779173	7	67779005	A	G	0.105263	0.262976	1	1	13.4083	0.241951	4e-05	0.485587	12.4441	3.41168	2	4	0.203061	0	0.996618	0.986491	0.000250513	0.00100205	ENSG00000226829	-25628	18_Quiescent/low_signal	1	0	0	0	0	0	0	1	Foxp3|0|-11.966021600572|8|-|11.919232681795|-0.046788918776997
rs34145103	4:77434506-77434967	4	77434724	T	C	0.289474	0.206997	0.977228	0.977228	13.4048	0.289949	4.2e-05	0.403689	14.8045	3.05811	4	4	3.05873	0	0.94327	0.967572	0.000250982	0.00100393	ENSG00000207307	18974	10_Active_enhancer_2	1	0	0	0	0	0	0	0	NA
rs9304424	18:21665974-21666539	18	21666008	G	T	0.789474	0.0475	0.999842	0.999842	12.8603	0.344249	0.002829	0.435776	14.4694	4.28702	4	3	0	0	0.994117	0.973312	0.000335625	0.00100687	ENSG00000215504	-30815	10_Active_enhancer_2	1	0	0	0	1	0	0	1	NA
rs3954956	2:141761673-141762295	2	141761965	G	A	0.473684	4.33716	0.998528	0.998528	10.814	0.647664	2.5e-05	0.584673	21.4695	4.48117	2	1	0	0	0.992763	0.988089	0.00100738	0.00100738	ENSG00000201892	11560	18_Quiescent/low_signal	0	0	0	0	0	0	0	1	Foxf2|0|11.966157240619|3|-|0.238135959874|12.204293200493
rs34977557	2:241832884-241833235	2	241833122	C	T	0.184211	0.294145	0.985078	0.985078	12.8492	0.688386	5.5e-05	0.51595	12.0216	3.67498	3	3	0	0	0.968301	0.979465	0.000337631	0.00101289	ENSG00000172478	3422	10_Active_enhancer_2	0	0	0	0	0	0	0	0	SP1_known2|0|8.467363022591|9|+|3.564525432492|12.031888455083
rs10468943	18:37688226-37689454	18	37688706	A	C	0.552632	0.033543	1	1	13.8059	0.616432	0.00198	0.480068	26.9923	5.2682	5	5	0.118905	0	0.97966	0.996092	0.000202698	0.00101349	ENSG00000243399	36242	10_Active_enhancer_2	1	0	0	0	1	1	1	1	NRSF_disc10|0|11.8056810912|6|-|0.451527472000009|12.2572085632
rs2549805	5:96176685-96177076	5	96176850	T	A	0.736842	0.139592	0.999864	0.999864	12.0819	0.314111	0.000148	0.448554	16.4416	3.41565	2	2	0	0	0.99583	0.992222	0.000509131	0.00101826	ENSG00000164307	-32793	6_Weak_transcription	0	0	0	0	0	0	0	0	Hoxa4|0|-2.32018694669|3|-|11.711978561072|9.391791614382
rs6438358	3:116581989-116582343	3	116582147	A	G	0.131579	0.43618	0.99977	0.99977	13.7937	0.277398	4.7e-05	0.575427	9.61242	2.64574	4	5	0.519905	0	0.994945	0.983404	0.00020402	0.0010201	ENSG00000242385	-58290	17_Weak_repressed_polycomb	1	0	0	0	0	0	0	0	Cdx|0|-9.85189249829801|12|+|13.552231891741|3.70033939344299
rs11963955	6:6631792-6632234	6	6631996	A	G	0.236842	6.02708	1	1	12.8141	0.309501	4.9e-05	0.512653	12.2861	2.99321	4	3	0	0	0.987738	0.994767	0.00034401	0.00103203	ENSG00000216863	-8815	6_Weak_transcription	0	1	0	0	0	0	0	0	CEBPB_known6|0|-11.274473546921|10|+|12.557691464782|1.28321791786099
rs6930534	6:80896000-80896123	6	80896050	C	T	0.394737	0.001437	0.969263	0.969263	10.7631	0.700312	0.033027	0.707944	8.52911	2.76802	1	1	0	0	0.953052	0.953052	0.00103541	0.00103541	ENSG00000083123	79635	6_Weak_transcription	0	0	0	0	0	0	0	0	RFX5_disc1|0|11.966140594553|8|-|3.987022763654|15.953163358207
rs8019614	14:101576289-101576596	14	101576440	C	T	0.394737	0.001437	0.99989	0.99989	12.8029	0.322523	3.7e-05	0.472071	7.1284	3.6112	3	3	0.087036	0	0.964472	0.995543	0.000346077	0.00103823	ENSG00000230805	-32281	10_Active_enhancer_2	1	0	0	1	1	0	0	0	Mxi1_disc1|0|-2.80139765919|2|-|13.83388675225|11.03248909306
rs11130548	3:56821345-56821560	3	56821402	T	C	0.289474	2.46609	0.992567	0.992567	13.3392	0.313607	0.003963	0.5283	10.4854	3.15664	4	4	0.408717	0	0.932385	0.915755	0.000259915	0.00103966	ENSG00000223674	-12154	10_Active_enhancer_2	1	0	0	0	0	0	0	0	TCF11::MafG|0|-1.169171909992|6|-|9.541404069088|8.372232159096
rs62373359	5:124652700-124653717	5	124653637	A	G	0.131579	0.43618	0.99977	0.99977	12.0399	0.301063	0.001845	0.433336	12.5818	4.71985	5	2	2.36899	0	0.948478	0.985227	0.000520728	0.00104146	ENSG00000222107	34124	10_Active_enhancer_2	1	1	0	0	1	1	1	1	Foxa_disc1|0|-10.323096495671|3|-|11.67812449574|1.355028000069
rs227164	1:7946139-7946839	1	7946604	A	T	0.184211	0.968783	1	1	13.7424	0.303899	2.5e-05	0.578832	16.7665	3.5715	5	5	5.06304	0	0.981722	0.985431	0.000209672	0.00104836	ENSG00000049247	-32567	10_Active_enhancer_2	1	0	1	0	1	1	1	0	TAL1_known1|0|-11.96620280205|4|+|13.0272319075|1.06102910545
rs76730390	2:218783522-218783925	2	218783659	G	A	0.210526	0.0475	1	1	14.3696	0.333967	1e-05	0.53432	11.2912	3.95894	7	7	1.85224	0	0.987393	0.989039	0.000150205	0.00105144	ENSG00000223923	-59909	10_Active_enhancer_2	1	0	0	0	0	1	1	0	HDAC2_disc3|0|-4.45148327885599|16|+|6.32067289326397|1.86918961440799
rs2319900	4:169485189-169485478	4	169485368	T	C	0.631579	0.325822	0.992207	0.992207	12.7713	0.65934	0.001964	0.488932	18.7097	3.73742	4	3	0	0	0.99368	0.986068	0.000351986	0.00105596	ENSG00000229226	34791	10_Active_enhancer_2	0	0	0	0	0	0	0	0	NA
rs537093	11:104865634-104866282	11	104866046	C	T	0.578947	2.35783	1	1	10.722	0.379718	3.4e-05	0.434863	15.4171	3.90835	3	1	0	0	0.992479	0.996419	0.00105868	0.00105868	ENSG00000196954	-25471	18_Quiescent/low_signal	1	0	0	0	1	0	0	0	MZF1::1-4_3|0|-11.873050674576|5|-|11.872292352624|-0.000758321951991547
rs1819979	19:48762986-48763633	19	48763556	G	A	0.552632	0.554724	0.998832	0.998832	13.7143	0.583267	0.003619	0.387915	24.0495	4.83031	6	5	12.2423	0	0.989407	0.994231	0.000212829	0.00106415	ENSG00000247217	4053	10_Active_enhancer_2	1	1	0	1	1	1	1	0	LBP-1_1|0|11.966145563246|2|-|1.89640622204999|13.862551785296
rs72967581	6:118698981-118699795	6	118699329	G	A	0.078947	0.139592	1	1	12.754	0.347337	0.001069	0.447105	28.6345	5.42638	3	3	0	0	0.994154	0.985137	0.000355252	0.00106576	ENSG00000216809	77174	10_Active_enhancer_2	1	1	0	0	1	1	1	0	AP-4_3|0|-11.74385262887|5|+|11.326056132938|-0.417796495931995
rs71481909	11:36297682-36298283	11	36298197	C	T	0.184211	0.968783	1	1	12.7537	0.367853	1.3e-05	0.558452	20.9402	4.55991	4	3	10.1785	0	0.994251	0.990805	0.000355313	0.00106594	ENSG00000196559	-2773	10_Active_enhancer_2	1	0	0	0	1	1	1	1	HNF4_known3|0|-11.966240973288|10|-|11.824409693832|-0.141831279456014
rs1451771	12:11381298-11381420	12	11381408	G	C	0.868421	1.81521	0.999309	0.999309	10.709	0.703777	0.000114	0.553036	20.5594	2.70876	1	1	0	0	0.992276	0.992276	0.00106616	0.00106616	ENSG00000197870	41343	18_Quiescent/low_signal	0	0	0	1	0	0	0	0	NA
rs11174576	12:63025286-63026471	12	63026436	C	T	0.131579	0.43618	0.969865	0.969865	14.3276	0.393897	0.001506	0.433985	57.8556	5.55574	10	7	0.468213	0	0.978739	0.949536	0.000153598	0.00107519	ENSG00000238475	-19670	1_Active_TSS	1	0	0	1	1	1	1	0	YY1_disc4|0|-5.575142242135|15|-|11.174739301915|5.59959705978
rs9813628	3:140089529-140089663	3	140089643	T	C	0.394737	0.001437	0.99945	0.99945	11.9789	0.663922	0.010177	0.568714	19.9506	2.2596	3	2	0	0	0.991662	0.993033	0.000538056	0.00107611	ENSG00000216184	119457	17_Weak_repressed_polycomb	0	0	0	0	0	0	0	0	AP-4_3|0|11.74385262887|5|-|-0.00299284500900399|11.740859783861
rs634514	12:69753206-69754233	12	69754017	G	A	0.052632	0.058642	1	1	15.3424	0.587919	0.001823	0.45261	44.3727	6.56954	12	12	4.00559	0	0.993119	0.978327	8.97e-05	0.00107616	ENSG00000127337	-327	1_Active_TSS	1	0	0	0	1	1	1	0	RREB-1_2|0|11.506777224137|7|+|1.07711037932398|12.583887603461
rs2286681	7:6035227-6035596	7	6035428	A	C	0.289474	0.43618	0.999105	0.999105	11.9714	0.307598	0.008804	0.4449	11.0734	3.4872	2	2	3.68164	0	0.986893	0.987202	0.000540225	0.00108045	ENSG00000201990	8789	10_Active_enhancer_2	0	0	0	0	0	0	0	0	AP-1_known4|0|-11.858979727455|6|-|12.926589680614|1.06760995315901
rs10459537	14:70689973-70690532	14	70690476	G	A	0.368421	0.172336	1	1	11.968	0.282305	0.018446	0.399139	4.67714	2.92317	2	2	0	0	0.974255	0.992837	0.000541222	0.00108244	ENSG00000235812	23894	2_Weak_TSS	0	0	0	0	1	1	0	0	MAZR|0|-11.966170888|7|+|14.41020718656|2.44403629856001
rs371888611	2:118561265-118561901	2	118561826	A	C	0.131579	0.43618	0.998392	0.998392	14.3019	0.660591	0.005275	0.508594	12.5659	4.34887	7	7	5.4429	0	0.994784	0.987711	0.000155706	0.00108994	ENSG00000238207	485	17_Weak_repressed_polycomb	0	0	0	1	1	1	0	0	NA
rs493431	11:83294781-83295534	11	83295373	T	C	0.789474	2.55444	1	1	14.5486	0.405031	0.002684	0.416257	37.118	5.04229	11	8	0	0	0.995336	0.995074	0.00013659	0.00109272	ENSG00000244678	-196622	10_Active_enhancer_2	0	1	0	0	0	0	1	0	Myc_disc5|0|-11.966156009073|8|-|12.650489610718|0.684333601644994
rs2896388	7:126580924-126581404	7	126581384	T	G	0.736842	2.42347	0.995702	0.995702	11.9482	0.673317	0.016571	0.395918	24.9427	4.04311	2	2	0.809119	0	0.984408	0.981719	0.000547009	0.00109402	ENSG00000230820	-40089	11_Weak_enhancer	0	0	0	0	0	0	0	0	Egr-1_disc7|0|4.71785035683|4|+|7.895925680152|12.613776036982
rs7096079	10:17180528-17180830	10	17180675	A	C	0.5	0.473684	0.960354	0.960354	11.9369	0.309491	0.00035	0.466509	12.0117	2.39619	2	2	0	0	0.920976	0.897889	0.000550328	0.00110066	ENSG00000107611	-8698	6_Weak_transcription	0	0	0	0	0	0	0	0	HNF1_3|0|-11.381398890494|1|-|19.021794007752|7.64039511725802
rs3809240	12:106994838-106995519	12	106995269	G	C	0.552632	1.23453	0.999787	0.999787	12.6873	0.34646	0.000115	0.46541	18.619	3.35441	3	3	0	0	0.991395	0.995243	0.000368155	0.00110447	ENSG00000111783	18152	17_Weak_repressed_polycomb	1	0	0	0	0	0	0	0	Mef2_known5|0|-11.936995712547|17|+|4.95767917942902|-6.97931653311801
rs6564755	16:80387608-80387895	16	80387671	C	A	0.421053	0.353306	1	1	11.9287	0.721229	0.00015	0.499584	6.5388	2.62725	2	2	0	0	0.994154	0.994488	0.000552757	0.00110551	ENSG00000168589	-187247	18_Quiescent/low_signal	0	0	0	0	0	0	0	0	En-1_1|0|11.814156935728|5|-|-3.189085935728|8.625071
rs11732389	4:6929896-6930152	4	6929901	C	T	0.263158	0.139592	0.999864	0.999864	11.9034	0.361634	7.2e-05	0.567226	28.733	3.33886	2	2	0.44799	0	0.995406	0.993257	0.000560326	0.00112065	ENSG00000132405	18926	10_Active_enhancer_2	0	0	0	0	0	1	0	0	NA
rs57396566	14:60324063-60324437	14	60324221	C	T	0.263158	3.97061	0.995007	0.995007	10.6152	0.654432	0.000239	0.457802	17.2918	3.18539	1	1	0	0	0.992529	0.992529	0.00112165	0.00112165	ENSG00000139970	13621	6_Weak_transcription	1	0	0	0	0	0	1	0	BATF_disc3|0|11.96615033878|6|-|-4.96975635349999|6.99639398528001
rs16904990	8:134783804-134784238	8	134784033	A	G	0.131579	1.81521	1	1	12.6499	0.267025	6.2e-05	0.398701	11.9955	3.30905	2	3	0.989445	0	0.984537	0.988657	0.000375582	0.00112674	ENSG00000241934	-15794	11_Weak_enhancer	0	0	0	1	0	0	0	0	HNF1_1|0|-11.83598336466|8|-|16.596128086146|4.760144721486
rs5841813	20:49377990-49379205	20	49378741	CT	C	0.710526	2.46609	0.985567	0.985567	11.8841	0.378227	3.9e-05	0.443979	21.3094	4.90469	4	2	0	0	0.994908	0.979186	0.000566148	0.0011323	ENSG00000124171	29908	10_Active_enhancer_2	1	0	1	0	0	0	1	0	HDAC2_disc6|0|-4.58358927735|16|-|13.12760347145|8.54401419410001
rs59857684	18:39211705-39212234	18	39212151	A	G	0.289474	0.43618	0.974172	0.974172	13.5969	0.259169	0.006555	0.376326	9.76002	2.87475	8	5	0	0	0.972326	0.955758	0.000226563	0.00113281	ENSG00000225253	-187314	18_Quiescent/low_signal	0	0	0	0	0	0	0	0	NA
rs111577583	10:27547666-27548337	10	27547930	C	G	0.105263	0.262976	1	1	13.5865	0.331662	9e-06	0.474047	20.3388	4.31774	8	5	4.37943	0	0.98852	0.987648	0.000227818	0.00113909	ENSG00000230445	-6944	1_Active_TSS	0	0	0	0	1	1	0	0	TR4_disc3|0|-3.66791818745801|6|-|12.606786774626|8.938868587168
rs1458758	4:123835616-123836069	4	123835879	T	G	0.763158	6.02708	1	1	11.8684	0.33387	0.00545	0.322602	15.0413	3.42039	2	2	0	0	0.995702	0.994503	0.00057094	0.00114188	ENSG00000170917	8507	6_Weak_transcription	1	1	0	1	0	0	0	0	Irf_disc6|0|-11.966170829976|1|-|15.71132|3.74514917002399
rs115779767	4:57687312-57688024	4	57688007	G	T	0.105263	0.262976	1	1	14.6794	0.634737	0.006326	0.505369	21.8586	4.95758	11	9	2.66755	0	0.922993	0.986928	0.000127432	0.00114689	ENSG00000128040	585	6_Weak_transcription	0	0	0	0	1	0	0	0	NA
rs746437	2:106406418-106407317	2	106406673	T	C	0.394737	0.996253	1	1	12.6143	0.378852	6.3e-05	0.446484	20.6239	4.65581	3	3	0.154242	0	0.992877	0.996338	0.000382807	0.00114842	ENSG00000071051	45063	10_Active_enhancer_2	0	1	1	1	0	1	1	1	NA
rs188353960	6:134158882-134159554	6	134159419	A	C	0.052632	0.058642	0.987907	0.987907	13.1388	0.338297	0.000631	0.519213	34.1932	4.58535	7	4	1.43501	0	0.981483	0.966623	0.000289249	0.001157	ENSG00000234554	8207	2_Weak_TSS	0	0	1	1	1	0	0	0	NA
rs3782726	12:6469417-6469845	12	6469671	G	T	0.710526	0.206997	1	1	10.5495	0.663551	0.000165	0.594375	13.9291	3.52834	1	1	0	0	0.994125	0.994125	0.00116218	0.00116218	ENSG00000111319	15298	10_Active_enhancer_2	0	0	0	0	1	0	0	0	AP-1_known1|0|11.966090780865|3|+|-0.0378496212780135|11.928241159587
rs1349283	3:22647947-22648175	3	22648120	T	C	0.289474	0.206997	0.955249	0.955249	11.8353	0.308995	6.1e-05	0.56675	9.00615	2.91656	2	2	0.810106	0	0.964409	0.930493	0.000581172	0.00116234	ENSG00000234723	64255	18_Quiescent/low_signal	1	0	0	0	0	0	0	0	Foxp1|0|-10.52608233556|12|+|-9.71820087578001|-20.24428321134
rs76241480	14:88495875-88496351	14	88496328	G	C	0.105263	0.262976	0.999721	0.999721	12.5915	0.317781	0.00194	0.453974	22.309	4.55598	5	3	0.10169	0	0.985331	0.986627	0.000387502	0.00116251	ENSG00000140030	24369	10_Active_enhancer_2	1	0	0	0	0	0	1	0	NF-I_1|0|-10.551688795506|27|+|1.75946612185601|-8.79222267365
rs13375435	1:201971681-201971894	1	201971862	C	T	0.315789	10.871	1	1	10.5431	0.670489	0.000185	0.522375	9.33775	3.00409	1	1	0	0	0.996831	0.996831	0.00116622	0.00116622	ENSG00000163435	-5393	10_Active_enhancer_2	0	1	0	1	0	0	0	0	1
rs6497243	15:28072503-28072627	15	28072596	C	T	0.368421	0.172336	0.994932	0.994932	12.579	0.7458	0.000121	0.51164	8.34364	2.37783	3	3	-1e-06	0	0.991946	0.987153	0.000390097	0.00117029	ENSG00000232394	51735	17_Weak_repressed_polycomb	0	0	0	0	0	0	1	1	AP-1_disc7|0|10.766024902542|11|+|0.811826873800001|11.577851776342
rs10780678	9:72459556-72460121	9	72459567	G	T	0.210526	0.0475	0.967199	0.967199	11.8211	0.651001	7.4e-05	0.574947	20.8981	4.38282	2	2	0	0	0.950784	0.946597	0.000585617	0.00117123	ENSG00000204711	23846	18_Quiescent/low_signal	1	1	0	0	0	1	1	1	Homez|0|2.35804543737|13|+|12.357311810236|14.715357247606
rs3818087	6:42671970-42672495	6	42672407	T	C	0.315789	1.37722	0.999757	0.999757	12.5774	0.693634	0.000111	0.469418	9.4322	3.58646	3	3	0	0	0.993752	0.992435	0.000390439	0.00117132	ENSG00000112619	18342	10_Active_enhancer_2	0	0	0	0	1	0	0	0	ZNF263_disc1|0|3.18027103069001|9|-|11.6903800296|14.87065106029
rs10954934	8:33669554-33670180	8	33669637	T	C	0.447368	0.554724	1	1	11.8208	0.661586	9.7e-05	0.563297	15.9658	3.60228	2	2	1.60723	0	0.990876	0.992887	0.000585741	0.00117148	ENSG00000240738	48187	6_Weak_transcription	1	0	0	0	1	1	0	0	PRDM1_disc1|0|11.966110286502|7|+|-0.214734832163998|11.751375454338
rs12884077	14:105553154-105553513	14	105553392	G	A	0.368421	0.325822	0.998535	0.998535	13.1046	0.617463	0.021989	0.498249	20.9098	3.87266	3	4	4.64199	0	0.84259	0.992289	0.000294578	0.00117831	ENSG00000183484	-21387	10_Active_enhancer_2	0	0	0	1	1	0	0	0	FEV|0|11.850708959298|6|+|0.265539403389994|12.116248362688
rs904549	11:36101601-36102074	11	36101932	G	A	0.342105	1.5558	0.999883	0.999883	11.8076	0.632718	3.9e-05	0.528559	12.4915	4.25218	2	2	9.32127	0	0.922265	0.993773	0.00058988	0.00117976	ENSG00000241228	-82376	6_Weak_transcription	1	1	0	0	0	0	1	1	GR_known8|0|10.1597010705|13|+|0.868371311749996|11.02807238225
rs2822402	21:15471992-15472170	21	15472138	G	C	0.605263	0.001437	0.993714	0.993714	13.5112	0.69324	4.8e-05	0.516662	16.2181	2.55179	5	5	0.106097	0	0.985452	0.982388	0.00023714	0.0011857	ENSG00000241115	-14490	18_Quiescent/low_signal	0	0	0	0	0	0	0	0	NA
rs7637801	3:134369321-134370640	3	134370585	T	A	0.421053	1.65857	0.974273	0.974273	13.5094	0.584878	0.001563	0.534147	40.6314	5.90838	6	5	10.1781	0	0.975855	0.944555	0.000237368	0.00118684	ENSG00000174611	1157	1_Active_TSS	1	0	0	1	1	1	0	1	AP-2rep|0|1.805922632412|2|+|8.318582367588|10.124505
rs11007191	10:28957419-28958067	10	28957854	T	C	0.236842	0.006973	1	1	10.5044	0.625347	6.3e-05	0.618339	27.7106	4.34923	1	1	0	0	0.994371	0.994371	0.00119094	0.00119094	ENSG00000207483	570	1_Active_TSS	0	0	0	0	1	0	0	0	ATF3_disc2|0|11.958308912195|16|+|-1.030105261025|10.92820365117
rs3934674	4:47013132-47013341	4	47013138	A	G	0.5	0.052632	1	1	10.4987	0.311887	0.000286	0.473747	9.37838	2.56009	1	1	0	0	0.994104	0.994104	0.0011946	0.0011946	ENSG00000109158	-16708	18_Quiescent/low_signal	0	0	0	0	1	0	0	0	Irf_disc3|0|-11.966165740662|8|-|9.202828973436|-2.76333676722601
rs3798761	6:150004651-150005247	6	150004779	A	G	0.394737	0.001437	1	1	10.4944	0.644803	7.7e-05	0.560417	15.6275	4.20078	2	1	0	0	0.993845	0.995798	0.00119736	0.00119736	ENSG00000244976	23968	6_Weak_transcription	0	1	1	0	0	1	1	0	NA
rs2904259	4:89885059-89886159	4	89885714	T	C	0.394737	0.001437	0.99989	0.99989	12.519	0.363358	0.005152	0.469129	23.0793	5.0511	5	3	0	0	0.977537	0.995743	0.000402842	0.00120853	ENSG00000138640	93264	10_Active_enhancer_2	1	1	0	0	0	0	1	0	AP-1_disc3|0|-11.96616527103|6|+|11.308902096679|-0.657263174351002
rs10536272	20:8193071-8193256	20	8193159	CT	C	0.105263	3.6981	0.989188	0.989188	10.4525	0.743591	0.01	0.5	17.9335	3.09872	0	1	0	0	1	0.981213	0.00122481	0.00122481	ENSG00000225479	-36281	6_Weak_transcription	0	0	0	0	0	0	0	0	NA
rs7744910	6:167070187-167070623	6	167070425	T	G	0.421053	2.35783	0.964421	0.964421	10.4476	0.334464	0.000188	0.393071	9.46717	3.59089	1	1	0.24948	0	0.952299	0.952299	0.00122808	0.00122808	ENSG00000235008	46140	2_Weak_TSS	0	0	0	0	1	0	0	0	p300_disc7|0|-11.966136557753|1|-|-21.964832901035|-33.930969458788
rs3104352	5:148737081-148738070	5	148737412	C	G	0.184211	0.294145	0.832424	0.832424	13.4438	0.370148	0.005218	0.507552	31.3922	6.29409	4	5	4.76107	0	0.827514	0.437153	0.000245813	0.00122907	ENSG00000145882	-498	1_Active_TSS	0	0	0	0	1	1	1	1	MAZ|0|-9.383015960091|5|+|12.157542072374|2.774526112283
rs9870765	3:172779644-172780517	3	172780120	C	T	0.236842	1.82996	1	1	13.4358	0.320639	0.003692	0.501349	12.4433	4.34391	5	5	3.69315	0	0.987664	0.981109	0.000246868	0.00123434	ENSG00000144962	79414	18_Quiescent/low_signal	1	1	0	0	0	0	1	1	TATA_known5|0|-4.28380068837599|2|+|12.227450608494|7.94364992011801
rs4746101	10:73716015-73716502	10	73716105	C	T	0.631579	1.96301	0.999435	0.999435	13.0044	0.65551	0.000261	0.555934	13.455	3.34017	4	4	0.350818	0	0.974665	0.993744	0.000310757	0.00124303	ENSG00000122863	-8109	6_Weak_transcription	0	0	0	1	1	0	0	0	Irf_known6|0|11.85080511285|6|-|-4.02296448504001|7.82784062780999
rs4921110	5:159608930-159609357	5	159608980	C	T	0.710526	0.43618	1	1	12.4597	0.656585	0.002068	0.524209	11.5738	4.48504	4	3	1.29067	0	0.995195	0.991765	0.000415832	0.00124749	ENSG00000170231	-5445	6_Weak_transcription	1	1	0	0	0	1	1	0	Obox3|0|6.66030681318801|12|-|5.51364683727199|12.17395365046
rs12463633	2:100879245-100879542	2	100879474	C	T	0.210526	2.55444	1	1	10.4142	0.344047	0.000104	0.32777	14.0131	3.19372	1	1	0.037733	0	0.99377	0.99377	0.00125047	0.00125047	ENSG00000232084	54528	17_Weak_repressed_polycomb	0	0	0	1	1	0	0	0	NF-kappaB_disc2|0|-10.214911858389|11|-|11.992941157095|1.778029298706
rs3213818	2:152402387-152402999	2	152402711	A	G	0.684211	0.012492	1	1	10.4101	0.653911	5e-05	0.475212	17.99	4.42866	1	1	0	0	0.994714	0.994714	0.00125327	0.00125327	ENSG00000080345	135989	11_Weak_enhancer	0	1	0	0	0	1	1	1	RXRA_known4|0|4.31400629682599|13|+|6.49550192855301|10.809508225379
rs12953925	18:68515632-68516295	18	68516105	A	C	0.184211	0.968783	0.995317	0.995317	12.4506	0.680691	6.2e-05	0.633439	17.4275	3.84459	3	3	0	0	0.973208	0.977966	0.000417848	0.00125354	ENSG00000222879	335668	18_Quiescent/low_signal	1	0	0	0	0	0	0	0	ZEB1_known3|0|11.966109551115|9|-|0.759309285974993|12.72541883709
rs11192932	10:108273033-108273531	10	108273359	C	A	0.052632	0.058642	0.998421	0.998421	12.9879	0.324406	1.1e-05	0.563555	22.8176	4.11439	5	4	0	0	0.988421	0.978285	0.000313504	0.00125402	ENSG00000215002	-36832	10_Active_enhancer_2	1	0	0	0	0	0	1	0	Rad21_disc10|0|-11.434072687728|5|-|12.895335106578|1.46126241885001
rs2074038	11:44087417-44088611	11	44087989	G	T	0.157895	0.824653	0.998621	0.998621	12.9842	0.575263	0.000605	0.513724	53.0661	6.00023	3	4	1.18235	0	0.943664	0.992981	0.000314133	0.00125653	ENSG00000110455	-313	1_Active_TSS	0	1	1	1	1	1	1	0	STAT_known10|0|11.966180014239|14|-|-6.50657382569499|5.459606188544
rs1492682	9:94395900-94396181	9	94396059	G	A	0.184211	0.968783	1	1	12.4383	0.290102	4.8e-05	0.592534	3.81582	2.98788	3	3	10.1943	0	0.943816	0.988378	0.000420623	0.00126187	ENSG00000228595	22274	18_Quiescent/low_signal	1	1	0	0	0	0	0	0	Foxa_disc1|0|-8.104707507621|7|-|11.727473514482|3.622766006861
rs7081718	10:98880412-98880731	10	98880474	G	C	0.342105	0.051986	0.999533	0.999533	11.6793	0.661276	0.006006	0.656679	17.0265	3.33987	2	2	0	0	0.993925	0.993853	0.00063199	0.00126398	ENSG00000234855	17898	10_Active_enhancer_2	1	0	0	0	1	1	0	1	PEBP|0|11.966115081634|6|+|1.90039241292399|13.866507494558
rs142285031	13:114201850-114202807	13	114202339	TG	T	0.157895	0.824653	1	1	14.8745	0.369581	0.001483	0.412242	17.2104	4.98963	9	11	3.97713	0	0.969655	0.986148	0.000114908	0.00126399	ENSG00000198176	-37187	10_Active_enhancer_2	1	1	0	0	0	1	1	1	NA
rs7227237	18:47173996-47174716	18	47174679	C	T	0.263158	0.655306	1	1	14.4957	0.356463	0.003886	0.366656	21.777	4.10557	8	9	0.273705	0	0.992391	0.984128	0.00014048	0.00126432	ENSG00000101670	85568	10_Active_enhancer_2	1	1	1	0	0	1	1	0	Ets_disc4|0|-11.966090686884|4|+|14.70741701354|2.74132632665599
rs203620	8:51027939-51028589	8	51028100	C	T	0.473684	1.35111	0.973977	0.973977	11.6777	0.355812	0.002449	0.337831	18.4429	5.63138	3	2	0.496567	0	0.972644	0.937794	0.000632528	0.00126506	ENSG00000147481	-278816	10_Active_enhancer_2	1	1	0	0	0	0	1	1	TCF11::MafG|0|-2.58079670425698|1|+|10.088878323898|7.50808161964102
rs73655408	9:119329127-119329787	9	119329434	G	C	0.236842	0.006973	0.999855	0.999855	14.6879	0.631877	0.004728	0.421174	22.614	4.28843	10	10	0	0	0.993209	0.994274	0.000126855	0.00126855	ENSG00000230894	-1602	10_Active_enhancer_2	1	0	0	0	1	0	0	1	Ik-2_1|0|1.846096357344|12|+|9.186595208272|11.032691565616
rs16922510	9:682742-683606	9	682945	G	A	0.131579	0.43618	0.998851	0.998851	13.3827	0.608151	0.001248	0.571393	46.7481	5.34748	8	5	0.338382	0	0.988001	0.988948	0.000253957	0.00126979	ENSG00000227914	2813	10_Active_enhancer_2	1	0	0	1	0	1	0	1	STAT_disc4|0|11.966196367272|3|-|-31.580113429584|-19.613917062312
rs986251	5:20570392-20571225	5	20570987	T	G	0.552632	0.554724	1	1	12.4113	0.63944	0.002491	0.469963	20.6883	5.66848	3	3	5.55884	0	0.995328	0.995006	0.000426739	0.00128022	ENSG00000214132	-264833	10_Active_enhancer_2	1	0	0	0	0	0	0	0	GR_known4|0|0.115395848254011|9|-|11.137784365312|11.253180213566
rs67559144	6:19137522-19138201	6	19138118	C	T	0.263158	2.42347	0.892849	0.892849	12.4102	0.575606	0.004472	0.515439	32.8273	5.60174	3	3	0.69346	0	0.874678	0.705996	0.000426995	0.00128099	ENSG00000217379	-6408	10_Active_enhancer_2	1	1	0	0	1	1	1	1	CEBPB_disc1|0|11.966056290696|9|-|-0.00127777371599791|11.96477851698
rs57656159	7:4244198-4244754	7	4244666	C	G	0.263158	0.655306	0.992494	0.992494	13.9711	0.687027	1.7e-05	0.572985	16.8187	3.94914	7	7	0	0	0.982525	0.986737	0.000185643	0.0012995	ENSG00000164916	-439191	10_Active_enhancer_2	0	0	1	0	1	0	1	0	Spdef|0|3.296945830486|7|-|9.46262852766501|12.759574358151
rs6816442	4:139335423-139335730	4	139335602	A	G	0.289474	0.43618	1	1	12.3806	0.674644	0.005753	0.649116	23.4977	3.38064	3	3	0	0	0.988065	0.992175	0.000433814	0.00130144	ENSG00000151012	-171920	18_Quiescent/low_signal	0	0	0	0	1	0	0	0	NRSF_known3|0|11.966109693435|13|+|-16.179914819635|-4.21380512619999
rs6877393	5:94081933-94082316	5	94082218	G	A	0.315789	1.37722	1	1	12.91	0.343652	0.003973	0.55379	11.2579	3.01585	4	4	0.47537	0	0.939808	0.983246	0.000326836	0.00130734	ENSG00000243806	80466	18_Quiescent/low_signal	0	0	0	0	0	0	0	0	NA
rs1246986	6:4995020-4995468	6	4995132	T	G	0.289474	0.206997	0.977446	0.977446	12.8978	0.357745	0.002138	0.458143	12.7538	3.51587	5	4	12.0816	0	0.987782	0.96716	0.000328973	0.00131589	ENSG00000124787	9277	6_Weak_transcription	1	0	0	0	1	0	0	0	NA
rs12378299	9:21029536-21030015	9	21029802	G	C	0.342105	0.051986	0.98869	0.98869	12.3505	0.632407	2.5e-05	0.579597	25.8889	4.54693	3	3	0	0	0.988867	0.982496	0.000440862	0.00132259	ENSG00000188921	2099	18_Quiescent/low_signal	1	1	1	0	0	0	0	0	Mtf1_1|0|11.966154425694|9|+|-2.56963586251601|9.39651856317799
rs3863515	17:66255155-66255952	17	66255421	A	G	0.710526	0.206997	0.961466	0.961466	11.5944	0.367761	6.9e-05	0.370262	28.1673	4.39996	2	2	0.353632	0	0.972387	0.960933	0.00066152	0.00132304	ENSG00000141337	-169	10_Active_enhancer_2	1	0	0	0	1	1	0	0	NA
rs2135306	21:28025720-28026205	21	28026191	T	G	0.184211	0.968783	0.99174	0.99174	13.6441	0.306463	0.003796	0.559434	20.2489	3.35261	5	6	2.87713	0	0.980291	0.977735	0.000220932	0.00132559	ENSG00000166265	-80117	18_Quiescent/low_signal	0	0	0	0	0	0	0	0	Pou1f1_1|0|-11.579275088459|7|-|12.665672019172|1.08639693071301
rs9484272	6:139750635-139751113	6	139750933	T	A	0.052632	0.058642	1	1	11.5906	0.248993	0.005539	0.376978	13.2671	3.54453	3	2	4.3603	0	0.932889	0.942352	0.000662876	0.00132575	ENSG00000238099	43557	10_Active_enhancer_2	1	0	0	0	1	1	0	0	Lmo2-complex_2|0|-1.22130840042399|2|-|12.497672|11.276363599576
rs145167833	7:82058741-82059234	7	82058883	A	G	0.078947	0.139592	1	1	12.8838	0.64675	0.002777	0.475497	25.8303	4.81869	5	4	3.01315	0	0.992191	0.985097	0.000331439	0.00132576	ENSG00000153956	14373	6_Weak_transcription	0	0	0	0	0	0	0	0	NA
rs749973	14:96561924-96562628	14	96562048	G	A	0.342105	0.051986	0.78033	0.78033	13.299	0.569622	0.002175	0.503906	37.6043	5.79928	6	5	0.089146	0	0.733282	0.520203	0.00026555	0.00132775	ENSG00000227051	5157	10_Active_enhancer_2	1	1	0	0	0	1	1	1	NA
rs61703483	6:151267715-151267947	6	151267940	A	G	0.552632	0.033543	0.96895	0.96895	10.3018	0.252575	0.000274	0.412297	4.23681	2.892	1	1	0	0	0.902236	0.902236	0.00132904	0.00132904	ENSG00000202119	7352	6_Weak_transcription	1	0	0	0	0	0	0	1	NA
rs202064913	3:124553679-124554460	3	124554043	T	T	0.157895	0.667969	0.999802	0.999802	11.5841	0.344585	1.4e-05	0.415651	39.8592	5.00704	2	2	0	0	0.995816	0.987324	0.000665192	0.00133038	ENSG00000243986	28488	10_Active_enhancer_2	1	0	1	0	1	1	0	0	Bach1|0|-11.96610935299|9|+|11.20853053178|-0.757578821209989
rs1038908	11:12009101-12009994	11	12009415	T	C	0.526316	2.55444	1	1	13.2895	0.630012	2.3e-05	0.478659	14.6443	4.59344	5	5	0.22947	0	0.990858	0.996822	0.000266894	0.00133447	ENSG00000050165	21816	6_Weak_transcription	1	1	1	1	1	1	1	1	Msx-1_1|0|3.317719447746|9|-|6.674917624604|9.99263707235
rs7825050	8:81122137-81122486	8	81122446	C	T	0.342105	0.626168	1	1	11.5738	0.311752	0.011868	0.507143	6.9601	2.77208	2	2	0.926768	0	0.987186	0.989684	0.000668865	0.00133773	ENSG00000222697	5295	10_Active_enhancer_2	1	0	0	0	0	0	0	0	Irf_known8|0|-6.086991156633|8|-|14.823122894772|8.736131738139
rs56320266	1:93479308-93479490	1	93479471	C	T	0.368421	0.325822	0.992735	0.992735	10.2888	0.720943	0.000293	0.49287	12.2242	2.88558	1	1	2.64954	0	0.975741	0.975741	0.00133843	0.00133843	ENSG00000222664	-12502	18_Quiescent/low_signal	0	0	0	0	0	0	1	0	AP-1_known2|0|11.603672840258|5|+|0.493379159742005|12.097052
rs681382	6:161371267-161372033	6	161371800	G	A	0.421053	0.353306	0.962657	0.962657	11.5688	0.629372	2.3e-05	0.678496	16.7879	4.28711	3	2	0	0	0.966725	0.952532	0.000670669	0.00134134	ENSG00000231863	19154	10_Active_enhancer_2	1	0	0	0	0	0	0	0	Nrf-2_2|0|11.451705327142|9|+|0.0693003407070023|11.521005667849
rs3760835	19:46974355-46975182	19	46974781	G	A	0.631579	0.325822	0.983219	0.983219	14.3827	0.420831	1.6e-05	0.513253	27.5434	4.3062	13	9	20.3756	0	0.965225	0.973142	0.000149166	0.00134249	ENSG00000182013	465	1_Active_TSS	0	0	1	0	1	1	0	0	NA
rs646764	3:163896588-163897475	3	163896873	G	A	0.210526	2.55444	0.998894	0.998894	14.375	0.68713	0.002488	0.683885	4.92162	4.31107	8	9	9.59647	0	0.983033	0.994989	0.00014978	0.00134802	ENSG00000221251	-7244	18_Quiescent/low_signal	0	0	0	0	0	0	0	0	NA
rs6799840	3:32237660-32238206	3	32237972	A	G	0.131579	1.81521	1	1	12.3136	0.308979	9.2e-05	0.450158	9.91322	2.75597	3	3	8.03449	0	0.971686	0.988465	0.00044966	0.00134898	ENSG00000237433	5420	18_Quiescent/low_signal	0	0	0	0	0	0	0	0	RREB-1_2|0|-10.092756011365|3|+|2.901687960359|-7.191068051006
rs7230946	18:9707739-9708823	18	9708100	C	T	0.210526	0.0475	0.959474	0.959474	14.1487	0.383778	7e-06	0.519101	16.7257	5.12861	9	8	9.99232	0	0.897544	0.950559	0.000168913	0.0013513	ENSG00000168461	-490	10_Active_enhancer_2	0	0	0	0	1	1	0	0	CTCF_disc9|0|-8.252920235472|9|-|11.40167092275|3.148750687278
rs78965472	10:30934130-30934811	10	30934685	G	G	0.736842	0.139592	0.946788	0.946788	13.6074	0.347269	0.005832	0.345103	18.5831	4.27483	5	6	0	0	0.986573	0.896717	0.00022529	0.00135174	ENSG00000230998	-10289	10_Active_enhancer_2	1	0	0	1	1	0	0	1	NA
rs11242236	5:134586887-134587084	5	134586980	G	A	0.421053	0.353306	0.974475	0.974475	10.2697	0.328017	0.000206	0.433505	13.5825	2.6623	1	1	0	0	0.944935	0.944935	0.00135231	0.00135231	ENSG00000247684	-148084	17_Weak_repressed_polycomb	0	0	0	0	0	0	0	0	RFX5_disc1|0|-11.966140594553|2|-|16.506150885074|4.540010290521
rs58173607	18:74277011-74277799	18	74277779	G	T	0.421053	0.120222	1	1	12.3054	0.402438	5e-05	0.394213	39.0083	4.98735	3	3	2.06859	0	0.993638	0.991844	0.000451648	0.00135494	ENSG00000247544	36398	10_Active_enhancer_2	1	1	0	0	1	1	1	1	AhR_2|0|-11.966154745806|6|+|12.239319064869|0.273164319063
rs11063638	12:679719-679978	12	679802	T	C	0.342105	0.051986	0.923384	0.923384	11.5484	0.657645	9.1e-05	0.511694	21.389	3.41351	2	2	0	0	0.832714	0.833295	0.000678072	0.00135615	ENSG00000238370	19036	1_Active_TSS	0	0	0	0	0	0	0	0	FXR_1|0|9.38295908779901|1|-|2.66860539720699|12.051564485006
rs80317333	3:191777154-191777417	3	191777199	C	CAT	0.394737	0.996253	0.972221	0.972221	10.263	0.622873	4.5e-05	0.454474	28.0781	3.72022	2	1	0	0	0.957828	0.951551	0.00135726	0.00135726	ENSG00000232353	29484	10_Active_enhancer_2	1	0	0	0	1	1	0	0	E2A_2|0|13.076672102676|9|-|-1.089563744213|11.987108358463
rs7230116	18:67947500-67948104	18	67948021	A	G	0.473684	2.55444	0.970041	0.970041	10.2592	0.621536	6.9e-05	0.456528	27.1666	3.34983	2	1	0	0	0.966225	0.970927	0.00136006	0.00136006	ENSG00000170677	-8669	18_Quiescent/low_signal	0	0	0	0	0	0	0	0	NF-E2_disc3|0|11.966098645184|6|+|-1.474456088992|10.491642556192
rs7864287	9:136019629-136020048	9	136019903	A	G	0.473684	0.459753	0.856323	0.856323	12.2964	0.390759	0.005103	0.460598	32.7519	4.63531	3	3	0	0	0.705435	0.820146	0.000453842	0.00136152	ENSG00000160271	5092	1_Active_TSS	1	0	0	1	1	1	0	0	NA
rs3891271	6:119616136-119616698	6	119616432	G	A	0.394737	0.996253	1	1	12.8276	0.371104	3.5e-05	0.538946	11.2273	3.94878	3	4	10.3277	0	0.99419	0.995968	0.000341546	0.00136618	ENSG00000216316	-25257	6_Weak_transcription	1	0	0	0	0	0	0	0	NA
rs6920106	6:17815573-17815798	6	17815716	C	T	0.368421	0.172336	0.999774	0.999774	11.5316	0.616989	3.7e-05	0.455696	21.3925	3.69575	2	2	2.13116	0	0.9928	0.992481	0.000684241	0.00136848	ENSG00000217340	67036	6_Weak_transcription	0	0	0	1	0	0	0	0	NA
rs7708319	5:123203841-123204515	5	123204222	C	A	0.368421	0.172336	1	1	12.8232	0.378541	1.6e-05	0.595984	21.3863	4.07414	4	4	0.588509	0	0.993482	0.995966	0.000342348	0.00136939	ENSG00000222901	107455	18_Quiescent/low_signal	1	1	0	0	0	0	1	0	NA
rs6832089	4:39507314-39507507	4	39507457	T	C	0.236842	0.006973	1	1	10.2267	0.720691	0.000323	0.559077	7.40908	2.87016	1	1	0	0	0.991741	0.991741	0.00138419	0.00138419	ENSG00000246868	6930	5_Strong_transcription	0	0	0	0	0	0	0	0	Osr|0|8.24694670133|8|-|8.93855364999099|17.185500351321
rs7678230	4:101854715-101855021	4	101854916	G	A	0.052632	0.058642	1	1	11.4949	0.739838	5e-05	0.62961	21.3467	3.5793	2	2	0	0	0.974985	0.97567	0.000697893	0.00139579	ENSG00000221265	396856	18_Quiescent/low_signal	0	0	0	0	1	0	0	0	Crx_1|0|11.966134993837|9|+|-0.205811103401004|11.760323890436
rs1343572	9:14620745-14621087	9	14620925	G	C	0.763158	1.82996	1	1	11.4934	0.715207	0.007137	0.464605	19.2313	2.71046	2	2	0.069064	0	0.995633	0.988021	0.000698422	0.00139685	ENSG00000229029	27169	6_Weak_transcription	0	0	0	0	0	0	0	0	Nkx6-1_1|0|9.111194134458|10|-|2.009020271968|11.120214406426
rs4502554	3:111431062-111432006	3	111431352	C	T	0.210526	2.55444	0.998735	0.998735	12.7858	0.399866	1.6e-05	0.482346	26.5171	5.44972	4	4	1.1116	0	0.994834	0.995246	0.00034926	0.00139704	ENSG00000144824	-20283	10_Active_enhancer_2	1	1	1	0	1	1	1	0	NA
rs12404086	1:72106742-72107731	1	72107386	C	T	0.526316	0.459753	0.999262	0.999262	11.4872	0.41023	6.8e-05	0.477824	35.7389	4.18955	2	2	2.26546	0	0.990304	0.986745	0.000700788	0.00140158	ENSG00000231985	70102	18_Quiescent/low_signal	1	0	0	0	1	0	0	0	Pax-5_disc1|0|-4.73801164783998|10|-|12.03177248|7.29376083216
rs4461689	5:152501720-152502483	5	152501731	C	G	0.289474	0.206997	0.999872	0.999872	13.1971	0.648467	8.8e-05	0.463895	22.3663	3.8645	3	5	0	0	0.990966	0.994198	0.000280378	0.00140189	ENSG00000155511	-368485	6_Weak_transcription	1	1	0	0	1	1	0	1	CTCFL_disc1|0|6.782656748943|4|-|2.35289816151301|9.13555491045601
rs10447377	6:54486249-54486365	6	54486278	G	T	0.5	0.052632	0.999266	0.999266	10.1995	0.294243	0.000201	0.343342	5.92837	2.55478	1	1	0	0	0.994056	0.994056	0.0014048	0.0014048	ENSG00000220773	-3155	18_Quiescent/low_signal	0	0	0	1	0	0	0	0	NRSF_known1|0|-9.16100278338499|7|+|0.916611535509986|-8.244391247875
rs569376	11:100183190-100183600	11	100183385	A	T	0.078947	0.139592	1	1	12.2378	0.230693	0.003303	0.570803	4.7811	3.33835	3	3	7.43177	0	0.98984	0.974135	0.000468315	0.00140494	ENSG00000242165	329795	18_Quiescent/low_signal	1	0	0	0	0	0	0	0	NA
rs74508318	19:57172000-57172370	19	57172210	G	T	0.263158	0.655306	0.999864	0.999864	13.1907	0.323438	4.3e-05	0.432824	12.7401	3.01091	5	5	0.245166	0	0.967862	0.994354	0.000281348	0.00140674	ENSG00000127903	4830	10_Active_enhancer_2	0	1	0	1	1	1	0	0	ATF3_known8|0|-11.6767136598|7|-|12.36558466336|0.688871003559996
rs13073932	3:66474257-66474531	3	66474487	A	G	0.289474	0.206997	1	1	11.4776	0.343322	0.000109	0.386488	11.0209	3.29499	2	2	1.32492	0	0.993908	0.993962	0.000704386	0.00140877	ENSG00000144749	77430	10_Active_enhancer_2	0	0	0	0	0	0	0	0	Bach1|0|-11.96610935299|11|+|8.09547143965|-3.87063791334
rs2148021	10:105275131-105275571	10	105275425	T	A	0.289474	0.206997	1	1	12.2298	0.378077	3.3e-05	0.521078	15.3496	3.68424	3	3	1.01932	0	0.996047	0.995541	0.000470321	0.00141096	ENSG00000235470	2019	10_Active_enhancer_2	1	0	0	0	1	1	0	1	NA
rs1507284	1:86603078-86603641	1	86603322	C	T	0.157895	0.667969	1	1	10.1909	0.301917	9.5e-05	0.36861	15.6715	3.69592	1	1	0.28256	0	0.985687	0.985687	0.00141132	0.00141132	ENSG00000171502	19548	18_Quiescent/low_signal	0	0	0	0	0	0	0	1	Myc_disc4|0|-11.966199322448|1|-|12.446873103624|0.480673781175994
rs8057835	16:11012362-11012847	16	11012695	C	T	0.315789	0.012492	0.986409	0.986409	12.7607	0.35816	5.4e-05	0.506138	9.81808	3.58205	4	4	1.6209	0	0.989128	0.978341	0.000353979	0.00141592	ENSG00000245788	-15399	9_Active_enhancer_1	0	0	1	1	1	1	0	1	STAT_known10|0|-11.399172001701|11|+|8.361498724328|-3.03767327737299
rs6877636	5:2266792-2267239	5	2266931	C	A	0.342105	0.051986	1	1	11.4679	0.329753	4e-05	0.458352	11.9593	3.85865	3	2	0	0	0.966707	0.994343	0.000708093	0.00141618	ENSG00000201026	81967	10_Active_enhancer_2	0	0	0	0	1	1	0	0	Fox|0|-10.851135387222|9|-|11.463249901008|0.612114513785997
rs2349075	2:202223489-202223708	2	202223566	A	G	0.578947	1.65857	0.999247	0.999247	11.4653	0.69241	7.8e-05	0.546442	15.3151	3.0789	2	2	0	0	0.994897	0.992073	0.000709072	0.00141814	ENSG00000155749	-1368	6_Weak_transcription	0	0	0	0	0	0	0	0	Maf_disc1|0|11.966094761964|9|-|-5.373295253896|6.592799508068
rs7320604	13:107386684-107386974	13	107386883	T	C	0.605263	0.85067	0.99945	0.99945	11.4637	0.678328	0.000196	0.574492	9.37619	3.01647	2	2	0	0	0.989617	0.986506	0.000709691	0.00141938	ENSG00000227590	70898	18_Quiescent/low_signal	0	0	0	0	0	0	0	0	NA
rs10060138	5:10111790-10111936	5	10111844	T	C	0.710526	2.46609	1	1	11.4519	0.664001	6.4e-05	0.481566	19.9776	2.71779	2	2	0	0	0.994682	0.994527	0.000714194	0.00142839	ENSG00000196193	-89832	18_Quiescent/low_signal	0	0	0	1	0	0	0	0	BDP1_disc1|0|0.582129049020011|11|-|-1.627420681568|-1.04529163254799
rs67702029	12:15271953-15272191	12	15271992	ACT	A	0.552632	0.033543	1	1	12.1964	0.673071	4.6e-05	0.526637	13.7271	3.42863	3	3	0	0	0.963543	0.992079	0.000478806	0.00143642	ENSG00000134533	102351	6_Weak_transcription	0	1	0	0	0	0	0	0	NA
rs4697348	4:22825815-22826209	4	22825991	A	G	0.052632	0.058642	1	1	10.1579	0.755683	9e-05	0.603622	17.3194	3.93642	1	1	0	0	0.978707	0.978707	0.00143687	0.00143687	ENSG00000237350	-96242	18_Quiescent/low_signal	0	0	0	0	0	0	0	0	NA
rs10013573	4:54321942-54322448	4	54322107	A	G	0.842105	0.824653	0.989864	0.989864	11.4387	0.335988	3.7e-05	0.344032	13.9857	4.49112	1	2	0	0	0.98636	0.98636	0.000719315	0.00143863	ENSG00000241625	30608	6_Weak_transcription	1	1	0	0	0	0	1	0	p300_disc7|0|-11.023083460102|8|+|14.652453|3.62936953989799
rs10483294	14:25566433-25566775	14	25566637	T	A	0.105263	3.6981	0.998605	0.998605	10.155	0.325841	0.000107	0.445717	16.9612	3.40698	1	1	0	0	0.990302	0.990302	0.00143908	0.00143908	ENSG00000168952	-47163	6_Weak_transcription	1	0	0	0	1	1	1	0	SIX5_disc3|0|-9.06166990079998|12|+|2.63463061704999|-6.42703928374999
rs11934161	4:189890560-189891196	4	189891003	G	A	0.394737	0.001437	1	1	12.1857	0.693959	0.000123	0.482886	13.428	3.49624	3	3	0	0	0.988918	0.979171	0.000481582	0.00144475	ENSG00000180015	231053	6_Weak_transcription	1	0	0	0	0	1	0	1	NA
rs11182428	12:38525946-38526588	12	38526387	T	C	0.421053	2.35783	0.985123	0.985123	12.7149	0.651714	0.001329	0.595347	12.1158	3.76945	7	4	1.21133	0	0.984548	0.980278	0.000362761	0.00145104	ENSG00000239943	-5503	6_Weak_transcription	1	0	0	0	0	0	0	0	NA
rs10892674	11:121002677-121003246	11	121002972	G	A	0.342105	0.051986	1	1	12.7113	0.370272	1.7e-05	0.540556	15.1273	4.48188	4	4	1.20158	0	0.98764	0.995283	0.000363447	0.00145379	ENSG00000109927	30794	6_Weak_transcription	1	1	0	0	0	0	0	1	AIRE_2|0|-11.966159315625|12|+|-15.0531920186|-27.019351334225
rs6440251	3:144134192-144134730	3	144134473	T	G	0.868421	1.81521	1	1	12.1732	0.293069	2.7e-05	0.28704	8.63946	4.31807	2	3	0	0	0.993191	0.992777	0.000484806	0.00145442	ENSG00000241555	-228330	18_Quiescent/low_signal	0	0	0	0	0	0	1	1	Tel2|0|-11.64429194891|9|-|7.37931176100199|-4.26498018790801
rs34549551	4:156881380-156882109	4	156881607	A	G	0.184211	0.968783	0.992598	0.992598	12.71	0.595673	2e-05	0.512044	18.1891	5.52855	4	4	0.017665	0	0.989455	0.981803	0.000363708	0.00145483	ENSG00000151792	-6332	10_Active_enhancer_2	1	1	0	1	1	0	1	0	BCL_disc1|0|11.741490738432|3|-|-0.0789873676999946|11.662503370732
rs4917742	10:98374358-98374587	10	98374426	C	G	0.526316	0.058642	1	1	10.1315	0.696418	0.000321	0.506595	8.60906	2.88651	1	1	0	0	0.99375	0.99375	0.00145758	0.00145758	ENSG00000202047	-4776	6_Weak_transcription	0	0	0	0	0	0	0	0	TCF11::MafG|0|10.159557957117|6|+|0.351657649063014|10.51121560618
rs7731626	5:55444438-55444772	5	55444683	G	A	0.447368	0.033543	0.997036	0.997036	12.7057	0.360529	5.3e-05	0.508558	13.1328	3.51689	3	4	5.95645	0	0.881711	0.989891	0.000364538	0.00145815	ENSG00000223003	-1765	18_Quiescent/low_signal	1	0	0	0	0	0	0	0	RREB-1_2|0|-11.828798791421|2|-|0.988575578345007|-10.840223213076
rs10228906	7:22481818-22482270	7	22481963	G	A	0.578947	0.120222	0.998815	0.998815	11.4118	0.392219	8.9e-05	0.439815	28.3011	3.7548	2	2	0.037369	0	0.993162	0.994598	0.000729809	0.00145962	ENSG00000221549	69739	11_Weak_enhancer	1	0	0	0	1	0	0	0	NA
rs4531131	9:26723591-26724048	9	26723702	A	G	0.184211	0.294145	0.99965	0.99965	12.1626	0.309874	6.2e-05	0.394503	9.54641	3.26721	3	3	0.657907	0	0.968426	0.988015	0.000487576	0.00146273	ENSG00000246383	-117095	17_Weak_repressed_polycomb	0	0	0	1	0	0	0	0	WT1|0|-0.169754572165999|4|-|10.804356873327|10.634602301161
rs17213284	7:24868520-24868954	7	24868789	C	G	0.289474	0.206997	1	1	12.6911	0.341579	0.004975	0.584121	12.6187	3.54903	4	4	3.22363	0	0.986628	0.994676	0.000367403	0.00146961	ENSG00000105928	-70788	6_Weak_transcription	0	0	0	0	1	0	0	0	Mef2_known2|0|-11.04045236138|3|-|8.81572566142|-2.22472669996
rs335754	19:30638958-30639125	19	30639045	T	C	0.710526	0.206997	0.999872	0.999872	10.112	0.262962	0.000394	0.330917	4.30768	2.40978	1	1	0	0	0.992697	0.992697	0.00147307	0.00147307	ENSG00000213092	110627	17_Weak_repressed_polycomb	1	0	0	0	0	0	1	0	KAP1_disc2|0|-2.500530172998|5|-|12.77040091185|10.269870738852
rs2303727	19:41115726-41116101	19	41115914	T	C	0.5	0.052632	0.998958	0.998958	12.1445	0.659306	0.002948	0.435098	9.91394	4.3134	3	3	0	0	0.993196	0.994662	0.000492339	0.00147702	ENSG00000090006	16653	1_Active_TSS	0	0	0	0	0	0	0	0	NA
rs10940417	5:49891110-49891363	5	49891251	G	A	0.526316	0.459753	0.858307	0.858307	10.1061	0.325884	0.00037	0.418231	14.3707	2.73001	1	1	0.143302	0	0.819337	0.819337	0.00147777	0.00147777	ENSG00000213956	-37813	18_Quiescent/low_signal	0	0	0	0	0	0	0	0	Osf2_2|0|-11.966128534488|7|-|12.465361555104|0.499233020616003
rs2605884	8:74120241-74120685	8	74120344	A	G	0.684211	0.012492	0.999027	0.999027	11.3872	0.334642	5.1e-05	0.434674	14.9439	3.92657	2	2	0.126545	0	0.994048	0.994652	0.000739531	0.00147906	ENSG00000222334	-65100	17_Weak_repressed_polycomb	1	1	0	0	1	0	1	0	Foxa_disc1|0|-11.966094460032|10|+|13.379507214669|1.41341275463701
rs490055	6:86070732-86071566	6	86071004	A	T	0.526316	1.35111	0.999894	0.999894	12.1413	0.357216	0.001194	0.435719	17.3148	5.5352	4	3	-2e-06	0	0.995002	0.994044	0.000493164	0.00147949	ENSG00000234155	29172	10_Active_enhancer_2	0	0	1	0	0	1	0	0	Pou3f2_1|0|-11.966217334472|11|+|13.218509680522|1.25229234605
rs709494	3:107697432-107697707	3	107697666	A	G	0.578947	0.353306	1	1	10.1013	0.658932	0.000245	0.580987	16.3712	2.65455	1	1	0	0	0.995441	0.995441	0.00148164	0.00148164	ENSG00000247551	-55265	6_Weak_transcription	0	0	0	0	0	0	0	0	AP-1_disc8|0|11.207403840603|9|+|-4.78493813049501|6.422465710108
rs10044670	5:18998529-18999021	5	18998725	C	G	0.315789	0.012492	1	1	11.3802	0.405249	4.9e-05	0.44881	32.0378	4.18955	2	2	2.20838	0	0.994988	0.99503	0.000742298	0.0014846	ENSG00000242745	-40007	18_Quiescent/low_signal	1	0	0	0	1	0	0	0	STAT_known6|0|-11.94002409339|9|+|4.04513362532401|-7.894890468066
rs72622445	14:51749172-51749592	14	51749407	G	A	0.105263	3.6981	1	1	11.3767	0.698898	5.2e-05	0.458931	15.7742	4.04113	2	2	1.51098	0	0.983803	0.992629	0.000743694	0.00148739	ENSG00000201820	-28431	6_Weak_transcription	1	1	0	0	0	1	1	0	Myf_3|0|11.883731193116|11|-|0.0733785564559923|11.957109749572
rs1862087	2:207625491-207626002	2	207625567	T	C	0.210526	2.55444	0.999842	0.999842	10.0908	0.61152	5.3e-05	0.446758	41.2153	4.46553	1	1	0	0	0.995582	0.995582	0.00149014	0.00149014	ENSG00000118246	-4591	6_Weak_transcription	1	0	0	0	0	0	0	0	HNF1_5|0|11.405565942936|14|+|-1.158450898148|10.247115044788
rs4880	6:160113624-160115068	6	160113872	A	G	0.421053	1.65857	1	1	13.0825	0.45109	4e-06	0.566909	66.9106	6.39734	7	5	0	0	0.973726	0.99419	0.000298072	0.00149036	ENSG00000112096	729	1_Active_TSS	0	0	0	0	1	1	0	0	NA
rs71534335	7:32767391-32768840	7	32768379	T	C	0.815789	0.294145	0.911705	0.911705	13.9609	0.564095	0.001269	0.485383	55.7153	6.34962	9	8	0.769317	0	0.952077	0.862846	0.000186652	0.00149322	ENSG00000237004	-791	1_Active_TSS	0	1	0	0	1	1	1	0	ETF|0|11.265896397355|5|+|0.0510546026449958|11.316951
rs1378950	4:25971881-25972921	4	25972292	G	C	0.342105	0.051986	0.999883	0.999883	13.4111	0.363719	0.001892	0.497194	18.2944	4.64234	8	6	9.98341	0	0.954847	0.970275	0.000250144	0.00150086	ENSG00000223895	23452	10_Active_enhancer_2	1	0	1	0	1	0	0	0	NA
rs73154978	7:78937655-78937781	7	78937676	G	T	0.131579	0.43618	0.999079	0.999079	11.3564	0.261134	2.7e-05	0.595839	13.8621	2.912	2	2	5.4322	0	0.984228	0.986067	0.000751885	0.00150377	ENSG00000212482	35033	6_Weak_transcription	0	0	0	1	0	0	0	0	NA
rs1076685	1:172993844-172994020	1	172993932	A	T	0.236842	0.006973	0.973087	0.973087	10.0738	0.723787	0.000279	0.578976	7.50212	2.65593	1	1	0	0	0.954296	0.954296	0.00150389	0.00150389	ENSG00000120337	26259	18_Quiescent/low_signal	1	0	0	0	0	0	0	0	1
rs7933438	11:128041482-128041642	11	128041582	G	A	0.157895	6.93533	1	1	10.0605	0.320122	7.6e-05	0.529064	16.8372	2.69786	1	1	0	0	0.995045	0.995045	0.00151482	0.00151482	ENSG00000134954	415971	6_Weak_transcription	1	0	0	0	0	0	0	0	GATA_disc2|0|-1.91530584503698|10|-|13.994186229985|12.078880384948
rs2198700	8:52042382-52042629	8	52042419	G	A	0.578947	0.353306	1	1	10.0495	0.664701	0.000415	0.473426	19.7829	2.70504	1	1	0	0	0.994469	0.994469	0.00152389	0.00152389	ENSG00000201316	114800	18_Quiescent/low_signal	1	0	0	0	0	0	0	0	NA
rs3019446	6:162166449-162167121	6	162166833	C	T	0.789474	0.0475	1	1	10.0444	0.36417	0.000111	0.41706	28.7777	3.73267	1	1	0	0	0.993105	0.993105	0.00152812	0.00152812	ENSG00000222199	124758	18_Quiescent/low_signal	1	0	0	0	0	0	0	0	SP2_disc2|0|-5.82454390592|5|-|10.78509847744|4.96055457152001
rs629199	1:234763828-234764165	1	234764103	C	T	0.184211	0.294145	1	1	11.3193	0.641463	4.6e-05	0.509168	30.7467	3.9564	2	2	0	0	0.993367	0.994083	0.000767073	0.00153415	ENSG00000224939	-1230	10_Active_enhancer_2	0	0	0	0	0	0	1	0	GATA_disc2|0|11.966183199039|3|-|0.850063500277003|12.816246699316
rs2960347	19:38997627-38998136	19	38997679	G	T	0.263158	0.139592	1	1	13.3516	0.275701	0.007016	0.391406	5.80815	3.52211	5	6	0	0	0.988673	0.992898	0.000258201	0.0015492	ENSG00000196218	73286	16_Repressed_polycomb	0	0	0	0	0	0	0	0	CCNT2_disc2|0|-11.95511948754|1|-|12.27433000782|0.319210520279995
rs10810446	9:15782045-15782556	9	15782358	C	G	0.526316	2.55444	1	1	10.0162	0.63786	0.00028	0.653254	20.6213	3.04945	1	1	0	0	0.994887	0.994887	0.00155168	0.00155168	ENSG00000207360	-5761	18_Quiescent/low_signal	0	0	0	0	0	0	0	0	ZEB1_known2|0|11.966193527112|7|-|-0.598575783776006|11.367617743336
rs140001367	4:9692736-9693794	4	9693296	CGCTCCGTCTCGGCCCCGCCCCAAGCCCA	C	0.605263	0.85067	0.855893	0.855893	13.6345	0.430147	0.001617	0.457212	41.1172	6.60034	8	7	2.9089	0	0.944863	0.65141	0.000222063	0.00155444	ENSG00000186234	-1384	1_Active_TSS	0	0	0	0	1	1	0	0	HNF4_disc2|0|-36.33921543101|-21|+|12.800618121206|-23.538597309804
rs16884944	4:31367641-31368005	4	31367758	T	G	0.210526	2.55444	0.999526	0.999526	12.5809	0.608944	1.8e-05	0.50745	33.1474	4.27388	4	4	7.57554	0	0.992283	0.995471	0.000389711	0.00155884	ENSG00000215248	-237889	18_Quiescent/low_signal	0	1	1	0	0	0	0	0	MIF-1|0|11.644402909532|6|+|-7.034624291684|4.60977861784801
rs10777646	12:78393953-78394205	12	78394032	G	A	0.815789	0.968783	0.99965	0.99965	11.2805	0.619688	2.4e-05	0.510288	15.7147	3.59738	2	2	4.80502	0	0.994563	0.99096	0.000783256	0.00156651	ENSG00000067798	168883	18_Quiescent/low_signal	0	0	0	1	0	0	1	0	Nrf1_known2|0|11.966182743176|10|-|-0.729337255016006|11.23684548816
rs112086822	18:42502961-42503261	18	42503137	T	G	0.157895	0.824653	0.961594	0.961594	12.0271	0.295746	0.00013	0.347736	11.999	3.14223	1	3	0	0	0.950122	0.950122	0.000524336	0.00157301	ENSG00000152217	242822	6_Weak_transcription	0	0	0	0	0	0	0	0	NA
rs35420720	8:73614878-73615298	8	73614996	G	A	0.342105	0.051986	1	1	9.98833	0.356966	6.4e-05	0.428755	28.6105	3.43235	2	1	0	0	0.99236	0.993409	0.00157536	0.00157536	ENSG00000182674	134907	10_Active_enhancer_2	1	0	1	0	1	1	0	0	Hsf_known1|0|-10.828968633225|1|+|8.164892314296|-2.66407631892901
rs113431281	8:93381964-93382227	8	93381989	G	A	0.289474	0.43618	0.975927	0.975927	11.2651	0.69097	0.062585	0.469553	17.4097	2.3446	2	2	0.131644	0	0.942856	0.93414	0.0007898	0.0015796	ENSG00000237766	53261	18_Quiescent/low_signal	0	0	0	0	0	0	0	0	NA
rs303450	10:30725266-30725390	10	30725337	C	A	0.710526	0.206997	0.986967	0.986967	9.97953	0.654427	7.8e-05	0.56363	19.1298	3.42301	1	1	0	0	0.977698	0.977698	0.0015829	0.0015829	ENSG00000107968	2399	1_Active_TSS	0	0	0	0	0	0	1	1	Pou3f2_2|0|11.96618977197|9|+|-2.62460945487999|9.34158031709001
rs8180176	4:55807806-55808652	4	55808036	C	T	0.526316	0.058642	0.990895	0.990895	11.2562	0.629396	3.9e-05	0.547191	26.5027	4.09584	5	2	0	0	0.981444	0.979509	0.000793568	0.00158714	ENSG00000244422	34732	17_Weak_repressed_polycomb	0	0	0	0	1	0	0	0	Evi-1_2|0|5.84295105451201|6|-|-10.097534498912|-4.2545834444
rs11982047	7:91704890-91705429	7	91705274	G	A	0.342105	1.5558	0.999416	0.999416	9.97383	0.632616	9.8e-05	0.545828	32.2941	4.10828	1	1	0	0	0.993795	0.993795	0.00158781	0.00158781	ENSG00000188693	-58281	6_Weak_transcription	1	1	0	0	0	1	1	1	Mef2_known5|0|11.830206342684|10|+|-11.7865513754|0.0436549672839988
rs62579672	9:130110380-130110619	9	130110572	C	G	0.236842	0.006973	0.999855	0.999855	11.2539	0.290161	0.011006	0.406254	8.74623	2.89834	2	2	0	0	0.984459	0.972813	0.000794549	0.0015891	ENSG00000229369	-47119	6_Weak_transcription	1	0	0	1	1	0	1	0	NA
rs34493932	2:160134121-160134305	2	160134252	C	CTAAA	0.421053	2.35783	0.999245	0.999245	11.2527	0.733971	0.000216	0.483903	8.38872	2.45251	1	2	0	0	0.92066	0.994215	0.000795091	0.00159018	ENSG00000196151	9189	6_Weak_transcription	1	0	0	0	0	0	0	0	Fox|0|22.31533960071|14|-|-8.946077143254|13.369262457456
rs11557132	12:11323565-11324701	12	11323848	G	A	0.236842	1.82996	0.998691	0.998691	14.6024	0.463298	0.000705	0.501655	58.7325	6.56667	16	12	0.081116	0	0.995537	0.990767	0.000132743	0.00159292	ENSG00000244867	-257	1_Active_TSS	0	1	0	0	1	1	0	0	TATA_disc8|0|-2.993264748518|2|+|11.815524676916|8.822259928398
rs10502366	18:7990671-7991230	18	7991006	T	A	0.368421	0.172336	0.999661	0.999661	12.0011	0.373918	0.013267	0.46785	22.0154	4.33978	3	3	0	0	0.993912	0.994677	0.000531696	0.00159509	ENSG00000199856	-4898	10_Active_enhancer_2	1	1	0	0	1	1	1	0	Prrx2_1|0|-11.833752547035|9|+|11.975918971946|0.142166424910997
rs6475584	9:21810994-21811106	9	21811027	T	C	0.289474	0.206997	1	1	9.9642	0.314328	0.000151	0.338788	8.68993	3.09505	1	1	0	0	0.992562	0.992562	0.00159613	0.00159613	ENSG00000229298	1352	10_Active_enhancer_2	0	0	0	0	0	0	0	0	SREBP_disc1|0|-5.78819437538401|2|-|12.203387190264|6.41519281488
rs55747886	4:173743647-173743808	4	173743709	T	C	0.421053	0.120222	0.999245	0.999245	11.242	0.680595	0.000105	0.626625	15.1059	2.58875	2	2	0	0	0.994506	0.993726	0.000799661	0.00159932	ENSG00000222105	-319148	18_Quiescent/low_signal	0	0	0	0	0	0	0	0	HNF4_disc1|0|11.858315350788|5|+|1.66581258956199|13.52412794035
rs6430803	2:139482097-139483172	2	139482866	A	G	0.315789	1.37722	0.97576	0.97576	11.9816	0.619353	0.000116	0.475244	22.4517	4.63284	2	3	0	0	0.980321	0.973469	0.000537277	0.00161183	ENSG00000144227	55821	17_Weak_repressed_polycomb	1	0	1	0	0	0	0	0	HNF4_disc2|0|7.800923268926|3|+|-19.875547724192|-12.074624455266
rs10917075	1:22283208-22283930	1	22283671	C	T	0.710526	2.46609	0.928691	0.928691	12.5103	0.612454	0.001406	0.600915	15.7351	4.56732	5	4	2.40416	0	0.952391	0.921645	0.000404721	0.00161888	ENSG00000142798	-19418	10_Active_enhancer_2	1	0	0	0	1	1	0	0	NA
rs6455355	6:70829036-70830092	6	70829516	A	G	0.526316	1.35111	0.999157	0.999157	9.93476	0.380466	9.3e-05	0.451112	34.1723	4.65944	1	1	0	0	0.993824	0.993824	0.00162187	0.00162187	ENSG00000216365	-20468	18_Quiescent/low_signal	1	0	1	0	0	0	0	0	HNF1_1|0|-7.58092289587103|8|-|12.730453197499|5.14953030162799
rs587619282	7:74202751-74203443	7	74203084	G	C	0.131579	1.81521	0.730462	0.730462	9.9312	0.351283	1.4e-05	0.461688	20.686	5.15925	1	1	0	0	0.709644	0.709644	0.001625	0.001625	ENSG00000158517	14441	18_Quiescent/low_signal	0	0	1	1	1	1	0	0	NA
rs9302064	13:95966514-95967176	13	95966851	A	C	0.631579	0.172336	1	1	14.2197	0.395267	0.002744	0.368508	25.9179	4.53989	8	10	0	0	0.971089	0.99607	0.000162657	0.00162657	ENSG00000223298	-3305	18_Quiescent/low_signal	1	1	0	0	0	0	0	1	Foxc1_1|0|-11.966106118866|9|-|7.776661386225|-4.18944473264101
rs11998224	8:107312300-107313096	8	107312350	A	T	0.105263	3.6981	1	1	11.9617	0.272335	2.6e-05	0.488456	10.2046	4.17949	3	3	7.85183	0	0.991296	0.988047	0.000543048	0.00162914	ENSG00000164830	29826	18_Quiescent/low_signal	0	0	0	0	0	0	0	0	Pou3f2_2|0|-0.847562149769999|8|+|8.34460240313001|7.49704025336001
rs34212128	1:212415750-212416320	1	212416033	T	A	0.184211	0.968783	0.993588	0.993588	11.9442	0.363945	0.002774	0.530435	15.2305	3.71045	3	3	5.97965	0	0.990384	0.983209	0.000548192	0.00164458	ENSG00000226251	-3431	10_Active_enhancer_2	1	0	0	0	1	1	0	0	1
rs7805035	7:25965743-25965999	7	25965890	T	A	0.368421	0.172336	0.997984	0.997984	11.1855	0.700017	0.018365	0.716546	8.89461	2.60897	2	2	0	0	0.991797	0.990815	0.000824372	0.00164874	ENSG00000199085	23863	17_Weak_repressed_polycomb	0	0	0	0	0	0	0	0	AP-1_known4|0|11.966082453577|8|+|0.960507227037013|12.926589680614
rs375735941	3:195383358-195383931	3	195383901	G	A	0.157895	0.667969	0.860799	0.860799	11.1807	0.256907	0.00768	0.436827	8.12235	3.82641	2	2	0	0	0.788637	0.775207	0.000826529	0.00165306	ENSG00000229178	1440	18_Quiescent/low_signal	1	1	0	0	1	1	1	1	NA
rs486507	11:58696104-58696532	11	58696118	A	C	0.552632	1.23453	0.999894	0.999894	12.4707	0.355614	0.006965	0.485437	7.80109	4.7071	5	4	0	0	0.962533	0.993898	0.000413381	0.00165353	ENSG00000166840	929	11_Weak_enhancer	1	1	0	0	0	0	1	0	NA
rs62575263	9:118353897-118354300	9	118353966	G	A	0.052632	0.058642	1	1	9.8964	0.293043	1.2e-05	0.443848	34.4093	4.23948	3	1	3.30733	0	0.909505	0.977454	0.00165602	0.00165602	ENSG00000228714	-148046	17_Weak_repressed_polycomb	1	0	0	1	1	1	1	1	CTCF_disc9|0|-11.116672696976|13|+|14.60543133403|3.488758637054
rs7902208	10:132678688-132679532	10	132679471	C	T	0.184211	0.968783	0.9707	0.9707	13.2253	0.342659	1.8e-05	0.42221	15.1092	4.62398	7	6	0.222025	0	0.968278	0.925162	0.000276198	0.00165719	ENSG00000230098	-214794	6_Weak_transcription	1	0	0	0	0	0	0	0	NA
rs77415263	4:143470664-143471643	4	143471470	G	T	0.052632	0.058642	0.997897	0.997897	12.8748	0.342373	0.000397	0.539934	34.2367	5.74858	6	5	1.98506	0	0.981011	0.978067	0.000333036	0.00166518	ENSG00000109452	-86758	10_Active_enhancer_2	1	1	1	1	1	1	1	0	Arid5b|0|-0.806710232370008|12|-|12.38721429047|11.5805040581
rs1355419	2:160862998-160863347	2	160863244	G	C	0.105263	0.262976	1	1	11.9208	0.263579	7.3e-05	0.541594	9.68475	2.64915	2	3	0.025993	0	0.991384	0.980575	0.000555104	0.00166531	ENSG00000153246	56123	18_Quiescent/low_signal	0	0	0	0	0	0	0	1	Bach1|0|-11.96622056942|10|-|6.85685405874001|-5.10936651068
rs5805120	13:81843104-81844173	13	81843167	GA	G	0.368421	0.325822	0.99921	0.99921	11.151	0.353178	0.002444	0.517528	10.2858	5.32747	2	2	0	0	0.990209	0.991024	0.000839846	0.00167969	ENSG00000237148	-3923	18_Quiescent/low_signal	1	1	0	0	1	0	0	0	Pou2f2_known8|0|-1.037946702432|21|-|-0.753404556991995|-1.79135125942399
rs2892841	1:85224631-85225635	1	85224860	C	T	0.342105	1.5558	0.989583	0.989583	12.4391	0.605255	1.7e-05	0.501327	24.5659	4.5837	6	4	1.24143	0	0.993462	0.969046	0.000420443	0.00168177	ENSG00000117155	-68145	10_Active_enhancer_2	0	0	1	1	1	1	0	0	1
rs11462178	13:85140542-85141163	13	85140685	G	GT	0.789474	0.0475	0.997953	0.997953	11.1464	0.309738	8e-05	0.434994	21.3908	3.69766	2	2	0	0	0.925619	0.988459	0.000841928	0.00168386	ENSG00000233349	4042	18_Quiescent/low_signal	1	0	0	0	0	1	0	1	Mef2_known6|0|-11.5511392278|13|-|3.349882716004|-8.201256511796
rs4732122	7:135051979-135052212	7	135052044	A	C	0.342105	1.5558	1	1	11.1266	0.673064	0.000163	0.557407	13.4098	2.81961	2	2	0	0	0.989843	0.990278	0.000850966	0.00170193	ENSG00000227073	-77231	6_Weak_transcription	0	0	0	0	0	0	0	0	CTCFL_disc1|0|11.616013818006|7|+|0.782076452357998|12.398090270364
rs35401286	12:15334712-15334909	12	15334864	C	G	0.105263	3.6981	0.999721	0.999721	9.84458	0.301551	3.4e-05	0.399136	24.9917	3.05105	2	1	0	0	0.987175	0.992005	0.00170333	0.00170333	ENSG00000134533	39592	6_Weak_transcription	0	0	0	1	0	0	0	0	CTCF_disc8|0|-0.999390884442008|1|+|13.327165529471|12.327774645029
rs74769652	5:17062143-17062404	5	17062172	C	T	0.105263	0.262976	0.99722	0.99722	11.8768	0.781117	9.5e-05	0.548165	9.9319	3.25138	3	3	0	0	0.977329	0.984638	0.000568386	0.00170516	ENSG00000206814	55652	18_Quiescent/low_signal	0	0	0	0	0	0	0	0	Sin3Ak-20_disc7|0|2.049334017445|9|-|10.180129430895|12.22946344834
rs16875554	4:10927793-10928049	4	10927970	G	A	0.131579	0.43618	0.998853	0.998853	11.8547	0.262343	2.8e-05	0.421757	8.66196	3.22138	4	3	0	0	0.979617	0.965497	0.000575147	0.00172544	ENSG00000109684	-241407	18_Quiescent/low_signal	0	0	0	0	0	0	0	0	NA
rs6561665	13:52917564-52917804	13	52917592	G	A	0.421053	0.120222	0.978373	0.978373	9.81731	0.337806	0.031369	0.328294	19.4455	2.63468	1	1	0	0	0.930835	0.930835	0.00172877	0.00172877	ENSG00000217576	-9152	17_Weak_repressed_polycomb	0	0	0	1	0	0	0	0	Pou3f2_1|0|-1.99681875623999|14|-|11.956343019719|9.959524263479
rs881504	11:18929011-18929633	11	18929269	G	T	0.184211	4.28064	0.958638	0.958638	11.0867	0.354142	0.008646	0.437957	11.3349	4.63946	2	2	0	0	0.985308	0.962701	0.000869496	0.00173899	ENSG00000170255	65657	17_Weak_repressed_polycomb	0	1	0	0	0	0	1	1	NA
rs62574458	9:115874970-115875271	9	115875178	G	T	0.263158	2.42347	0.971677	0.971677	11.8288	0.332193	0.007161	0.404729	10.0797	3.11816	3	3	6.22812	0	0.890124	0.83338	0.000583228	0.00174968	ENSG00000231528	-207	17_Weak_repressed_polycomb	0	0	0	1	1	0	0	0	Myf_1|0|-10.773919174614|11|-|10.180977982446|-0.592941192168013
rs2708661	4:69372206-69372531	4	69372252	T	C	0.526316	2.55444	0.884236	0.884236	11.0745	0.684122	0.012282	0.42007	7.37683	2.51813	2	2	0.861533	0	0.80637	0.840762	0.000875252	0.0017505	ENSG00000087128	59038	18_Quiescent/low_signal	0	0	0	0	0	0	0	0	Lhx8|0|2.20551137436199|5|-|9.00404704781201|11.209558422174
rs7397852	12:76054625-76054826	12	76054670	A	T	0.736842	0.655306	0.996885	0.996885	9.7843	0.684396	0.00016	0.477836	11.0954	2.95422	1	1	0	0	0.986944	0.986944	0.00176009	0.00176009	ENSG00000234040	28251	6_Weak_transcription	0	0	0	0	0	0	0	0	Dlx2|0|6.022859674832|8|+|6.31587742294001|12.338737097772
rs17008912	4:125877978-125878206	4	125878081	C	A	0.447368	1.23453	1	1	9.77296	0.689331	0.000202	0.566889	6.16184	2.67095	1	1	0	0	0.995526	0.995526	0.00177097	0.00177097	ENSG00000151458	-246046	18_Quiescent/low_signal	0	0	0	0	0	0	1	1	Hoxa3_2|0|9.79158846395|7|-|3.25838644634901|13.049974910299
rs78313054	18:55712622-55713108	18	55712676	T	C	0.157895	0.667969	1	1	13.0976	0.594354	0.001823	0.495603	47.744	5.16773	6	6	4.20069	0	0.995811	0.989482	0.00029568	0.00177408	ENSG00000049759	1002	1_Active_TSS	0	0	0	0	1	1	0	0	Mef2_known2|0|3.04144068696002|4|+|9.01137637823999|12.0528170652
rs72607877	3:192090311-192091143	3	192090614	T	C	0.078947	0.139592	1	1	13.6362	0.646211	0.001495	0.490258	30.7785	4.45775	7	8	0.621043	0	0.977658	0.984639	0.000221863	0.0017749	ENSG00000231383	107277	18_Quiescent/low_signal	0	0	0	0	1	1	1	0	ELF1_disc3|0|4.33854322525001|4|+|5.85412048791599|10.192663713166
rs10557040	5:90140666-90141179	5	90141006	CAACT	C	0.263158	0.655306	0.977368	0.977368	11.8014	0.640212	3.8e-05	0.632368	28.5999	4.37753	1	3	0	0	0.979043	0.964698	0.000591853	0.00177556	ENSG00000164199	286048	10_Active_enhancer_2	0	0	0	0	0	0	0	0	NA
rs62411366	6:56637583-56638158	6	56637813	C	A	0.236842	1.82996	0.992301	0.992301	9.76058	0.315031	9.1e-05	0.320362	16.1052	4.03362	1	1	0.001195	0	0.916629	0.916629	0.00178294	0.00178294	ENSG00000231441	-71218	10_Active_enhancer_2	0	0	0	1	0	0	0	0	TLX1::NFIC|0|-11.9662088373|4|-|13.392530473728|1.42632163642801
rs2728482	7:47192730-47193632	7	47193030	G	A	0.315789	0.902531	1	1	11.7932	0.398571	1.7e-05	0.441733	34.8339	5.24611	4	3	1.26682	0	0.987915	0.993721	0.00059448	0.00178344	ENSG00000229192	-74004	10_Active_enhancer_2	1	1	0	0	0	1	1	0	AP-3|0|-11.966161756896|2|-|11.372654889312|-0.593506867583997
rs2036980	3:145940088-145940845	3	145940283	C	G	0.736842	0.139592	0.999458	0.999458	11.7845	0.620025	1.3e-05	0.452236	35.3932	4.90693	4	3	7.82414	0	0.987848	0.943078	0.000597256	0.00179177	ENSG00000114698	28878	10_Active_enhancer_2	1	0	0	1	1	1	0	0	RXRA_known2|0|11.966106467028|7|-|-0.137343642407998|11.82876282462
rs7626071	3:190261453-190261757	3	190261666	G	T	0.868421	1.81521	0.99885	0.99885	9.75149	0.296575	6.9e-05	0.424844	11.3981	3.74158	1	1	0	0	0.992891	0.992891	0.00179178	0.00179178	ENSG00000196083	29612	17_Weak_repressed_polycomb	1	0	0	0	1	0	0	0	Nrf-2_3|0|-11.96616132912|10|-|13.30449347928|1.33833215016
rs11748201	5:108820463-108821253	5	108820851	C	T	0.105263	0.262976	0.862787	0.862787	12.2992	0.330504	0.000922	0.540818	38.9228	4.49717	5	4	2.31374	0	0.921129	0.811423	0.000453158	0.00181263	ENSG00000198961	-74768	6_Weak_transcription	1	1	1	0	1	0	1	1	Pax-5_known3|0|-11.966154849376|9|+|4.80259340721602|-7.16356144216002
rs114567119	11:81583717-81584302	11	81583984	A	G	0.078947	0.139592	1	1	11.7582	0.29011	0.001835	0.414512	8.9274	4.00587	5	3	4.75844	0	0.994074	0.981628	0.000605743	0.00181723	ENSG00000240985	-316183	17_Weak_repressed_polycomb	1	1	0	0	0	0	1	0	DMRT1|0|-11.899094946244|8|+|5.532574593622|-6.36652035262202
rs1054475	1:151746234-151746494	1	151746235	C	T	0.447368	1.23453	1	1	9.72082	0.369772	0.000169	0.523936	18.143	3.29472	1	1	0	0	0.996286	0.996286	0.00182192	0.00182192	ENSG00000232937	8048	10_Active_enhancer_2	0	0	0	0	0	0	0	0	GATA_disc3|0|-11.966171895104|8|+|12.515314347085|0.549142451980998
rs1105108	7:5315210-5315639	7	5315414	C	G	0.394737	3.54395	0.729191	0.729191	9.70987	0.347894	0.000138	0.379719	18.1483	3.65447	1	1	-6.5e-05	0	0.370924	0.370924	0.00183281	0.00183281	ENSG00000164638	1209	10_Active_enhancer_2	0	0	0	0	0	1	0	0	NERF1a|0|-11.966111069357|6|-|6.34425464999302|-5.62185641936398
rs17005022	4:81942980-81943366	4	81943313	T	C	0.210526	1.35111	1	1	10.9835	0.655268	0.012565	0.565877	9.89937	3.33811	3	2	1.35221	0	0.983825	0.981186	0.000919271	0.00183854	ENSG00000152785	-9140	17_Weak_repressed_polycomb	0	0	0	0	0	0	1	0	SREBP_disc1|0|2.30086343209199|6|+|12.34563707166|14.646500503752
rs2059446	7:23954842-23955312	7	23955032	T	C	0.5	0.052632	1	1	12.6705	0.675513	2.1e-05	0.623987	11.4324	3.93025	5	5	0	0	0.996397	0.995124	0.000371461	0.00185731	ENSG00000227930	-17888	18_Quiescent/low_signal	0	1	0	0	0	0	1	1	E2A_1|0|1.582369709795|12|-|10.618462451886|12.200832161681
rs10893077	11:123578261-123578528	11	123578396	G	A	0.815789	4.28064	1	1	9.68303	0.381241	8.6e-05	0.413377	39.8532	3.7529	1	1	0	0	0.995359	0.995359	0.00185977	0.00185977	ENSG00000247385	-22982	6_Weak_transcription	0	0	0	1	0	0	0	0	NA
rs9397797	6:155594503-155594887	6	155594637	C	T	0.684211	0.012492	0.967181	0.967181	10.9569	0.663203	0.020028	0.65831	12.8352	3.50807	2	2	0	0	0.961389	0.930864	0.000932543	0.00186509	ENSG00000171217	9355	6_Weak_transcription	0	0	0	0	0	0	1	1	Bach1|0|11.96610935299|11|-|-1.78610836585|10.18000098714
rs2244039	1:69065810-69066176	1	69065865	A	T	0.210526	0.0475	0.998107	0.998107	12.6562	0.738674	6.3e-05	0.545663	8.18561	3.33221	5	5	0	0	0.993286	0.989882	0.000374318	0.00187159	ENSG00000225167	-85458	17_Weak_repressed_polycomb	0	0	0	1	0	0	0	0	RXRA_disc4|0|9.508290798235|6|+|2.05177525182|11.560066050055
rs647731	1:212691893-212692327	1	212692030	A	G	0.894737	0.262976	1	1	10.9456	0.688602	1.8e-05	0.371497	16.6939	4.01973	2	2	0.587106	0	0.995523	0.985518	0.000938281	0.00187656	ENSG00000228067	-27144	10_Active_enhancer_2	0	0	1	0	1	1	1	0	1
rs7802537	7:140356286-140357089	7	140356552	A	G	0.157895	6.93533	0.999407	0.999407	10.9451	0.337553	0.01518	0.474584	19.6759	4.06092	2	2	-9e-05	0	0.985323	0.99434	0.000938507	0.00187701	ENSG00000240173	10622	3_Flanking_TSS	1	0	0	0	1	1	0	0	NA
rs1287531	13:81844993-81845490	13	81845397	T	C	0.394737	0.001437	0.99956	0.99956	9.65796	0.337291	0.000129	0.505134	8.07184	4.26614	1	1	0	0	0.995081	0.995081	0.00188533	0.00188533	ENSG00000237148	-2034	18_Quiescent/low_signal	0	0	0	0	0	0	0	0	GATA_known9|0|-11.966178791788|6|+|14.721497808626|2.755319016838
rs1352318	8:89566666-89567118	8	89566903	G	A	0.236842	1.40601	1	1	11.6883	0.310661	4.1e-05	0.44659	13.5816	3.61129	3	3	0	0	0.98792	0.979812	0.000628936	0.00188681	ENSG00000242987	-157890	18_Quiescent/low_signal	0	0	0	1	0	0	0	0	Rad21_disc8|0|-10.601929968015|2|+|11.140168849445|0.538238881430004
rs1993973	12:26309484-26310225	12	26310107	G	A	0.842105	6.93533	1	1	10.9306	0.639258	3.8e-05	0.54325	23.8926	4.42093	2	2	0.040266	0	0.994102	0.994933	0.000945904	0.00189181	ENSG00000246695	18975	10_Active_enhancer_2	1	0	0	0	1	1	0	1	Lmo2-complex_1|0|11.966196294259|5|+|0.206761876230999|12.17295817049
rs1824872	7:95401639-95402918	7	95401698	T	C	0.815789	0.968783	0.99965	0.99965	11.681	0.406216	0.001091	0.438878	51.9855	6.21421	6	3	3.41366	0	0.992692	0.991105	0.000631429	0.00189429	ENSG00000158560	-180	1_Active_TSS	0	1	0	1	1	1	1	0	MIZF|0|-11.34488882439|2|-|11.684496396816|0.339607572426004
rs7260152	19:52160135-52160450	19	52160305	T	C	0.605263	0.85067	1	1	10.9265	0.642568	0.000193	0.465439	15.3157	3.07147	2	2	3.30121	0	0.991674	0.990317	0.000947969	0.00189594	ENSG00000243469	8019	17_Weak_repressed_polycomb	0	0	0	1	1	0	0	0	Ets_disc2|0|11.52408033135|9|-|-0.863847231566012|10.660233099784
rs7709149	5:80599471-80599689	5	80599578	A	G	0.315789	1.37722	1	1	9.64426	0.385386	4.7e-05	0.418533	20.3735	4.13925	1	1	0	0	0.996343	0.996343	0.00189945	0.00189945	ENSG00000131732	2068	6_Weak_transcription	1	0	0	0	0	0	0	0	Foxa_disc1|0|-11.949528944351|8|+|11.928229029693|-0.0212999146579875
rs67610769	3:80819061-80820578	3	80819170	T	C	0.210526	1.35111	0.998893	0.998893	12.6255	0.340997	0.009515	0.580471	7.84983	4.26594	6	5	0.722293	0	0.993185	0.984096	0.00038053	0.00190265	ENSG00000242781	5012	17_Weak_repressed_polycomb	0	0	0	0	0	0	0	0	NA
rs593300	6:84723574-84723974	6	84723635	C	T	0.289474	2.46609	0.997966	0.997966	9.6407	0.36108	2.7e-05	0.415059	14.7438	4.14976	2	1	0	0	0.993453	0.994841	0.00190313	0.00190313	ENSG00000230852	-9201	10_Active_enhancer_2	1	1	0	0	0	0	1	0	MIF-1|0|-11.966186889734|15|+|-1.51296695043999|-13.479153840174
rs16869158	6:71108090-71109357	6	71109165	A	T	0.157895	6.93533	0.999407	0.999407	11.6686	0.415516	0.000818	0.452468	48.5977	6.79776	4	3	-1e-06	0	0.950876	0.995195	0.000635626	0.00190688	ENSG00000237643	3499	10_Active_enhancer_2	1	1	0	0	1	1	1	1	Zec|0|-11.966160941586|10|-|9.43107109718201|-2.535089844404
rs9448431	6:79169571-79169850	6	79169839	T	C	0.210526	0.0475	0.994783	0.994783	12.1987	0.68904	3.5e-05	0.650836	15.8029	3.14634	4	4	0	0	0.987833	0.98821	0.000478218	0.00191287	ENSG00000230309	146182	18_Quiescent/low_signal	0	0	0	0	0	0	0	0	NA
rs7256521	19:53836484-53837411	19	53837110	G	A	0.421053	0.353306	0.884293	0.884293	13.9117	0.566718	0.001502	0.491839	42.0408	5.04222	12	10	0	0	0.883947	0.725607	0.0001916	0.001916	ENSG00000213799	-519	1_Active_TSS	0	0	0	0	1	1	0	0	NA
rs12733819	1:158087716-158088146	1	158087749	G	T	0.131579	0.43618	0.99977	0.99977	11.6552	0.328445	3.2e-05	0.471111	7.54149	3.30673	5	3	5.63682	0	0.991139	0.979899	0.000640223	0.00192067	ENSG00000231666	22713	16_Repressed_polycomb	0	0	1	1	1	0	0	0	1
rs4146515	10:82116111-82117069	10	82116602	G	A	0.578947	0.120222	0.996581	0.996581	11.652	0.630205	0.001236	0.477252	24.1594	4.8018	5	3	0.064919	0	0.992589	0.992006	0.00064134	0.00192402	ENSG00000170788	400	10_Active_enhancer_2	0	0	0	0	1	0	0	0	NA
rs7278224	21:19537246-19537741	21	19537437	G	C	0.105263	3.6981	0.918443	0.918443	11.6514	0.320909	0.006679	0.428102	26.8493	3.20717	3	3	0	0	0.982992	0.893241	0.000641543	0.00192463	ENSG00000227330	-50024	18_Quiescent/low_signal	0	0	0	1	0	0	0	0	CTCF_disc3|0|-11.966152832938|5|+|11.549483915269|-0.416668917669
rs9814167	3:67660782-67661228	3	67660908	T	C	0.5	0.473684	1	1	12.1872	0.325195	0.000159	0.366756	16.5503	3.40967	4	4	0.006339	0	0.992082	0.992441	0.000481182	0.00192473	ENSG00000245186	12430	5_Strong_transcription	0	0	0	0	0	0	0	0	NA
rs6464854	7:147805328-147805799	7	147805585	A	G	0.315789	1.37722	1	1	12.9372	0.688229	0.003594	0.591674	8.67517	3.42181	5	6	0	0	0.991008	0.995166	0.000322122	0.00193274	ENSG00000222632	168231	18_Quiescent/low_signal	0	0	0	0	0	0	0	0	TCF12_known1|0|11.966139153432|7|+|-33.931324770452|-21.96518561702
rs142942251	5:32973798-32974126	5	32973910	T	TAA	0.289474	0.206997	0.931589	0.931589	10.8853	0.315957	0.000158	0.520491	14.6327	3.28555	1	2	0	0	0.992962	0.887263	0.000969282	0.00193856	ENSG00000181495	184852	18_Quiescent/low_signal	0	0	0	0	0	0	0	0	Cart1|0|-16.534141910268|8|-|3.220637067635|-13.313504842633
rs77292833	8:105600356-105602082	8	105601628	C	G	0.078947	0.139592	0.997474	0.997474	12.9276	0.647617	0.011717	0.338203	11.019	7.2405	10	6	18.6808	0	0.900233	0.983206	0.000323777	0.00194266	ENSG00000147650	864	2_Weak_TSS	0	1	0	0	1	1	1	0	NA
rs11737516	4:141265743-141266474	4	141265921	A	G	0.605263	0.996253	0.99978	0.99978	10.877	0.387005	0.005822	0.486867	17.3665	4.89379	2	2	0	0	0.996706	0.996211	0.000973634	0.00194727	ENSG00000241923	22271	1_Active_TSS	0	0	0	0	1	1	0	0	EWSR1-FLI1|0|-11.966189829902|12|+|-9.96285717561997|-21.929047005522
rs61544471	8:144660088-144660957	8	144660545	A	G	0.131579	0.43618	0.99839	0.99839	12.5758	0.352609	0.00165	0.489598	10.9733	4.5947	6	5	4.89342	0	0.970152	0.963677	0.000390777	0.00195388	ENSG00000147813	731	1_Active_TSS	0	0	1	0	1	1	0	0	NA
rs4819593	22:17956581-17956845	22	17956759	C	G	0.736842	0.139592	1	1	9.58793	0.668032	0.00022	0.627959	15.1342	3.23562	1	1	0	0	0.992307	0.992307	0.0019586	0.0019586	ENSG00000228045	41480	10_Active_enhancer_2	0	0	0	0	1	1	0	0	E2F_known7|0|11.966164947985|11|+|-13.316909811695|-1.35074486370999
rs62645662	12:87880135-87880339	12	87880168	T	A	0.631579	0.172336	0.997517	0.997517	9.58631	0.684822	0.018975	0.429711	12.2546	2.29272	2	1	0	0	0.744445	0.992696	0.00196034	0.00196034	ENSG00000237340	296861	18_Quiescent/low_signal	0	0	0	0	0	0	0	0	NA
rs28649153	15:45207454-45208137	15	45207806	T	C	0.236842	1.40601	0.994773	0.994773	10.8584	0.353262	3.6e-05	0.530416	14.3584	4.41595	2	2	0.061378	0	0.992024	0.993634	0.00098348	0.00196696	ENSG00000212424	30639	10_Active_enhancer_2	1	0	0	0	0	0	1	0	Evi-1_5|0|-3.750928035333|6|-|13.236009563908|9.48508152857499
rs71893624	8:224166-224784	8	224727	AG	A	0.052632	0.058642	0.976638	0.976638	13.6633	0.326359	5e-06	0.442868	33.8796	5.26543	9	9	13.8751	0	0.991131	0.823586	0.000218689	0.0019682	ENSG00000223508	-41848	10_Active_enhancer_2	1	1	0	0	1	1	1	1	NA
rs1488978	2:214248459-214248823	2	214248686	G	A	0.157895	6.93533	0.988654	0.988654	9.57762	0.288401	9.3e-05	0.50132	9.04216	2.85391	1	1	0	0	0.985541	0.985541	0.00196963	0.00196963	ENSG00000144451	99345	6_Weak_transcription	1	0	0	0	0	0	0	0	Pax-6_1|0|-5.44290925634999|12|-|10.54302219675|5.1001129404
rs9328115	6:2686788-2687192	6	2686844	C	T	0.289474	0.206997	1	1	12.5585	0.629835	3.8e-05	0.526595	17.3695	3.48716	5	5	0.07126	0	0.992084	0.994368	0.000394404	0.00197202	ENSG00000228718	49617	18_Quiescent/low_signal	0	0	0	0	1	0	0	0	CEBPB_known2|0|11.966159493939|14|-|-1.05321384701999|10.912945646919
rs61653323	1:76024656-76025266	1	76024919	C	T	0.184211	0.968783	1	1	10.853	0.346323	3.4e-05	0.580274	18.7948	3.86329	2	2	3.14403	0	0.992907	0.990864	0.000986365	0.00197273	ENSG00000213579	-23081	10_Active_enhancer_2	1	0	0	0	1	0	0	0	Hoxa3_1|0|-3.16541355519|1|+|8.370759847344|5.205346292154
rs10772498	12:11848289-11848892	12	11848493	G	A	0.368421	1.96301	1	1	10.8512	0.622273	4.8e-05	0.46767	22.4176	4.22084	2	2	0	0	0.99669	0.996738	0.000987332	0.00197466	ENSG00000247758	-11151	6_Weak_transcription	0	0	0	0	0	1	0	1	AP-1_disc8|0|11.966181289892|8|-|-6.073927113121|5.89225417677099
rs2307788	4:88041940-88042421	4	88042178	CAG	C	0.605263	0.001437	1	1	10.8493	0.641764	4.9e-05	0.492261	20.1035	3.72053	2	2	0	0	0.990646	0.992981	0.000988335	0.00197667	ENSG00000247262	-40291	11_Weak_enhancer	1	0	0	0	0	0	0	0	HDAC2_disc3|0|19.240240389|12|-|-15.240265943452|3.99997444554799
rs12213288	6:130774275-130774811	6	130774533	C	A	0.131579	1.81521	1	1	9.56989	0.400749	0.003685	0.449611	37.775	5.46221	3	1	0	0	0.976349	0.993339	0.00197795	0.00197795	ENSG00000164484	87395	10_Active_enhancer_2	1	1	0	0	0	1	1	1	Pou1f1_1|0|-11.06545335298|3|+|12.028486152556|0.963032799575998
rs17158004	7:29489471-29489879	7	29489697	A	T	0.105263	3.6981	0.999721	0.999721	10.8405	0.644634	5.5e-05	0.499457	26.7475	3.81434	2	2	2.72856	0	0.988485	0.992348	0.000993013	0.00198603	ENSG00000223813	113815	18_Quiescent/low_signal	1	0	1	0	0	0	0	0	NA
rs9762579	4:165877827-165878643	4	165877990	G	T	0.578947	0.353306	1	1	12.8782	0.571203	0.001017	0.516915	34.5872	6.17425	6	6	0.252918	0	0.982596	0.996392	0.000332431	0.00199459	ENSG00000221891	-349	1_Active_TSS	0	0	0	0	1	1	0	0	Nkx2_9|0|11.966147661416|5|-|0.270659390239004|12.236807051655
rs714068	2:106407829-106408000	2	106407925	T	C	0.815789	0.968783	1	1	10.8253	0.26862	0.00014	0.503284	5.35922	2.93034	2	2	1.23748	0	0.996562	0.989706	0.0010012	0.0020024	ENSG00000071051	46474	10_Active_enhancer_2	0	0	0	0	1	0	0	0	RFX5_known5|0|-11.96608004143|5|-|11.33789803898|-0.628182002450004
rs10135725	14:52300970-52301672	14	52301298	C	T	0.210526	0.0475	0.955393	0.955393	11.5739	0.323105	0.002339	0.431246	11.3384	4.09588	5	3	8.87894	0	0.978709	0.933313	0.000668856	0.00200657	ENSG00000186469	-26081	10_Active_enhancer_2	1	1	0	0	1	1	1	0	AhR_1|0|-11.966142450827|12|+|14.747405014486|2.781262563659
rs9532296	13:39452775-39452979	13	39452934	C	T	0.315789	1.37722	0.998785	0.998785	10.8061	0.326292	0.000102	0.469909	14.6676	2.33001	2	2	0	0	0.992724	0.993899	0.00101167	0.00202335	ENSG00000225221	-23750	6_Weak_transcription	0	0	0	0	0	0	0	0	CCNT2_disc1|0|-11.96616266524|9|+|11.775236506324|-0.190926158916
rs10778949	12:83612694-83613240	12	83612864	A	G	0.710526	0.43618	1	1	10.8045	0.354776	1.4e-05	0.564124	13.5421	4.13365	5	2	2.71311	0	0.994346	0.994152	0.00101253	0.00202507	ENSG00000213270	67583	18_Quiescent/low_signal	1	1	0	0	0	0	1	0	NA
rs291337	2:240149398-240149754	2	240149587	T	C	0.578947	0.120222	1	1	9.52307	0.636833	7.9e-05	0.660186	23.2009	3.58232	2	1	0.085885	0	0.984296	0.968015	0.00202905	0.00202905	ENSG00000213828	-65345	10_Active_enhancer_2	0	0	0	1	0	0	0	1	NRSF_disc8|0|2.42473760146801|11|+|9.26588092230399|11.690618523772
rs960757	5:131825757-131827175	5	131826310	G	A	0.342105	0.051986	0.999766	0.999766	13.604	0.443467	0.000883	0.514441	38.1958	6.58731	10	9	4.58149	0	0.992332	0.995173	0.000225702	0.00203132	ENSG00000125347	733	1_Active_TSS	0	0	0	0	1	1	0	0	Nrf1_disc3|0|-4.077120176466|8|+|12.058666759163|7.981546582697
rs6756918	2:178487411-178487710	2	178487470	A	T	0.868421	0.43618	1	1	9.51488	0.340787	0.007689	0.352507	19.6262	4.37641	1	1	0	0	0.989744	0.989744	0.00203812	0.00203812	ENSG00000197557	-3717	6_Weak_transcription	0	0	0	1	0	0	1	0	Rad21_disc1|0|-11.011917047988|10|+|11.369836186034|0.357919138046
rs74665677	18:71212590-71213358	18	71212929	G	A	0.131579	0.43618	0.999082	0.999082	11.5447	0.281227	4.9e-05	0.35833	6.42533	4.31935	3	3	2.14648	0	0.978419	0.988161	0.000679414	0.00203824	ENSG00000222180	-199581	18_Quiescent/low_signal	1	1	0	0	0	0	1	0	Bach1|0|-11.96610935299|6|+|8.0081665421|-3.95794281088999
rs7636740	3:75482127-75482389	3	75482239	A	C	0.105263	0.262976	0.994989	0.994989	10.7916	0.292602	1.2e-05	0.367208	12.547	5.06115	2	2	0	0	0.985301	0.983154	0.00101964	0.00203927	ENSG00000244026	2134	6_Weak_transcription	0	0	0	0	0	0	1	0	Bach1|0|-11.96610935299|5|-|6.26496021828001|-5.70114913471001
rs932513	6:150559232-150559896	6	150559591	G	A	0.526316	0.459753	1	1	10.7906	0.387536	2.7e-05	0.656521	31.3444	3.98782	3	2	0	0	0.99423	0.996476	0.00102017	0.00204035	ENSG00000238594	73511	10_Active_enhancer_2	0	0	1	0	1	1	0	0	NA
rs17121316	12:44819063-44819232	12	44819151	A	G	0.184211	0.968783	1	1	10.7906	0.716017	0.000107	0.712835	12.9168	2.41613	2	2	0	0	0.987852	0.989843	0.00102018	0.00204036	ENSG00000201788	455689	18_Quiescent/low_signal	0	0	0	0	0	0	0	0	NA
rs35952701	18:63649196-63649690	18	63649352	A	T	0.289474	3.15363	0.999234	0.999234	10.7886	0.651544	9.8e-05	0.565957	15.8941	3.45312	2	2	9.0311	0	0.976701	0.975252	0.00102125	0.00204251	ENSG00000081138	231707	17_Weak_repressed_polycomb	0	0	0	0	0	0	0	0	NA
rs776973	2:229663289-229663873	2	229663304	A	G	0.526316	2.55444	0.975528	0.975528	10.7871	0.608382	0.004956	0.531002	29.1993	4.01845	4	2	0	0	0.977491	0.976035	0.00102207	0.00204414	ENSG00000237322	45248	18_Quiescent/low_signal	0	1	0	0	1	1	1	1	NA
rs10751704	12:132335708-132335975	12	132335963	T	G	0.736842	0.139592	0.983128	0.983128	9.508	0.338293	0.000136	0.262504	12.8112	3.0542	1	1	0	0	0.973118	0.973118	0.00204578	0.00204578	ENSG00000198598	22769	17_Weak_repressed_polycomb	0	0	0	1	0	0	0	0	NRSF_disc3|0|-11.960370297848|5|-|14.097979362176|2.137609064328
rs6723978	2:213159535-213160000	2	213159727	C	G	0.631579	0.325822	0.999322	0.999322	12.054	0.617639	0.00313	0.541279	24.8882	4.10543	4	4	0.001199	0	0.9836	0.938186	0.000516807	0.00206723	ENSG00000221782	131549	11_Weak_enhancer	1	0	0	0	0	1	1	1	BRCA1_known1|0|2.270974992243|3|+|6.868409007757|9.139384
rs4912848	5:141805772-141806183	5	141806062	C	T	0.236842	0.006973	0.964629	0.964629	9.48675	0.655126	0.00012	0.645397	18.3456	3.51013	1	1	0	0	0.939826	0.939826	0.00206961	0.00206961	ENSG00000231185	22005	10_Active_enhancer_2	1	0	0	0	1	0	0	0	NA
rs2660396	4:170170534-170171196	4	170170955	G	A	0.921053	0.139592	0.999638	0.999638	9.48464	0.620829	5e-06	0.47287	33.6583	4.82231	5	1	2.48224	0	0.996327	0.984749	0.00207199	0.00207199	ENSG00000154447	21715	10_Active_enhancer_2	1	0	0	0	0	1	0	0	Foxq1|0|1.32037904939899|11|+|9.73362014339601|11.053999192795
rs7579859	2:228746950-228747097	2	228747052	G	A	0.578947	0.120222	0.996524	0.996524	9.47006	0.693972	0.000341	0.589209	11.9914	2.5212	1	1	0.289509	0	0.988912	0.988912	0.00208852	0.00208852	ENSG00000123977	11179	17_Weak_repressed_polycomb	1	0	0	0	1	0	0	0	Irf_known1|0|11.96610613341|5|+|-4.12382681631999|7.84227931709
rs7299043	12:107682541-107682839	12	107682719	T	C	0.447368	0.033543	1	1	10.7381	0.657599	8.6e-05	0.560361	14.8625	3.02296	2	2	0	0	0.97617	0.986716	0.00104954	0.00209907	ENSG00000222354	-17355	17_Weak_repressed_polycomb	0	0	0	0	0	0	0	0	RFX5_disc1|0|11.966140594553|2|+|3.84734564872799|15.813486243281
rs6804455	3:154842631-154843388	3	154843309	C	G	0.421053	0.120222	0.984303	0.984303	13.0711	0.72754	0.021576	0.340111	2.60159	4.12379	7	7	0	0	0.9522	0.957553	0.000299894	0.00209925	ENSG00000240666	58443	18_Quiescent/low_signal	0	0	0	0	0	0	0	0	NA
rs77071057	9:87134402-87134599	9	87134553	A	G	0.078947	0.139592	0.964724	0.964724	9.45876	0.745344	8.5e-05	0.608123	12.1143	3.05879	2	1	0	0	0.853946	0.948065	0.00210143	0.00210143	ENSG00000228095	84942	18_Quiescent/low_signal	1	1	0	0	0	0	0	0	SIX5_known1|0|0.303714910604|14|+|11.009789872532|11.313504783136
rs10738542	9:19551195-19551880	9	19551434	G	A	0.868421	0.43618	0.996364	0.996364	11.4844	0.665595	0.004091	0.554502	33.3798	4.2075	4	3	0	0	0.990603	0.982825	0.000701833	0.0021055	ENSG00000240559	-58196	10_Active_enhancer_2	1	0	0	0	1	1	1	0	Mrg1::Hoxa9_2|0|0.677820256856023|3|+|7.57187366123999|8.24969391809601
rs4141243	11:17943606-17944091	11	17943805	A	C	0.473684	0.459753	1	1	12.0166	0.368466	4.7e-05	0.464974	20.7581	3.57371	4	4	0.467553	0	0.994417	0.994118	0.000527296	0.00210918	ENSG00000129158	91103	6_Weak_transcription	0	0	0	0	0	0	0	1	NA
rs2335814	12:3246532-3246676	12	3246604	T	C	0.657895	3.27834	0.99965	0.99965	10.7262	0.666832	0.005736	0.469561	12.446	2.78892	2	2	0	0	0.996057	0.99557	0.00105628	0.00211256	ENSG00000011105	60010	6_Weak_transcription	0	0	0	0	0	0	0	1	Arnt_1|0|11.966116843422|9|-|0.641892341822|12.608009185244
rs12228903	12:116796737-116797084	12	116796936	C	T	0.236842	1.82996	1	1	10.7179	0.316691	4.6e-05	0.388202	18.2893	3.86479	2	2	0	0	0.988083	0.985461	0.00106104	0.00212208	ENSG00000123066	-81594	17_Weak_repressed_polycomb	0	0	0	0	0	0	0	0	RREB-1_2|0|-2.58166634453804|18|+|0.994280684852015|-1.58738565968602
rs7622880	3:157573692-157574386	3	157574195	G	A	0.394737	0.001437	1	1	12.0031	0.593055	0.001324	0.491902	22.7538	5.30932	5	4	6.53723	0	0.995773	0.995716	0.000531133	0.00212453	ENSG00000241164	74822	11_Weak_enhancer	1	1	0	0	0	0	1	1	NA
rs11136272	8:144301705-144302260	8	144302179	C	T	0.342105	0.051986	0.999883	0.999883	11.4502	0.264885	0.002765	0.354031	3.86497	4.08993	3	3	0.169293	0	0.914476	0.993209	0.000714861	0.00214458	ENSG00000182851	6636	10_Active_enhancer_2	0	0	0	0	0	0	0	0	Maf_known2|0|-10.64472509016|14|-|-1.41036035945601|-12.055085449616
rs4636280	9:86040180-86040405	9	86040349	A	C	0.263158	0.655306	1	1	10.6879	0.327515	8.2e-05	0.36517	16.7354	2.57748	2	2	0	0	0.994141	0.994246	0.00107838	0.00215675	ENSG00000238608	-27009	17_Weak_repressed_polycomb	0	0	0	0	0	0	0	0	NA
rs1515555	12:92924401-92924975	12	92924696	G	A	0.473684	0.058642	1	1	13.0175	0.37532	3e-05	0.394788	25.786	3.61967	7	7	0.268454	0	0.993965	0.994971	0.000308591	0.00216014	ENSG00000238865	14362	6_Weak_transcription	0	0	0	0	0	0	0	0	NA
rs4658234	1:92048079-92049201	1	92048779	T	G	0.842105	0.667969	1	1	11.9715	0.658731	0.000964	0.451188	17.0212	4.86244	7	4	6.67586	0	0.993503	0.965663	0.000540208	0.00216083	ENSG00000229067	-17650	10_Active_enhancer_2	1	1	0	0	1	0	0	0	Myf_2|0|10.644844116094|2|+|2.77199750228|13.416841618374
rs4948351	10:61425137-61425438	10	61425189	C	T	0.315789	0.012492	1	1	11.4326	0.347223	7.1e-05	0.490944	17.242	2.73697	3	3	2.20044	0	0.992108	0.994597	0.000721656	0.00216497	ENSG00000244348	22991	6_Weak_transcription	0	0	0	0	0	0	0	0	Nkx3_3|0|-9.010302977637|9|+|11.736336925303|2.726033947666
rs1694805	5:178012537-178012726	5	178012591	G	A	0.315789	0.012492	0.816068	0.816068	9.40021	0.277765	0.000138	0.321726	6.45756	3.9907	1	1	-0.396966	0	0.482025	0.482025	0.0021696	0.0021696	ENSG00000050767	5019	16_Repressed_polycomb	1	0	1	1	1	1	0	0	Znf143_disc3|0|-1.47706437399599|1|-|12.514521116372|11.037456742376
rs141359565	5:127873051-127874076	5	127873993	G	C	0.184211	0.294145	1	1	13.0041	0.287026	1.6e-05	0.460608	4.60823	4.58774	8	7	18.4261	0	0.972587	0.844804	0.000310804	0.00217563	ENSG00000138829	684	2_Weak_TSS	0	0	0	0	0	0	0	0	BDP1_disc1|0|-0.651268648045971|12|+|1.34294459865799|0.691675950612023
rs12960805	18:7919675-7919856	18	7919707	A	G	0.5	1.31579	0.996482	0.996482	10.6538	0.695733	0.000163	0.530431	7.17747	2.32712	2	2	0	0	0.96075	0.98976	0.00109844	0.00219688	ENSG00000199856	-75894	6_Weak_transcription	1	0	0	0	0	0	0	0	ATF3_known7|0|0.313444985168005|11|-|11.8287658856|12.142210870768
rs6504407	17:64271804-64272130	17	64271989	A	C	0.789474	0.0475	1	1	10.6371	0.335017	0.009526	0.475339	13.2759	4.33279	1	2	0	0	0.99415	0.99415	0.00110844	0.00221687	ENSG00000243732	7942	18_Quiescent/low_signal	1	0	0	0	0	1	0	0	RXRA_disc3|0|-11.966186140106|3|-|11.970465427249|0.00427928714299952
rs7740538	6:47632777-47633342	6	47633098	C	T	0.289474	2.46609	0.998468	0.998468	10.6355	0.370859	2.2e-05	0.496993	15.1636	5.04897	2	2	1.46281	0	0.993613	0.995864	0.00110937	0.00221874	ENSG00000164393	8553	6_Weak_transcription	1	0	0	0	0	0	1	0	Maf_disc1|0|-11.966094761964|2|-|16.04336324366|4.077268481696
rs6517656	21:42583316-42583759	21	42583738	G	A	0.157895	0.824653	1	1	9.33239	0.685059	0.000146	0.523206	15.7326	3.13218	2	1	0	0	0.986674	0.991584	0.00225139	0.00225139	ENSG00000225745	-25047	6_Weak_transcription	1	1	0	0	0	0	1	1	AP-1_disc3|0|11.96616527103|8|+|-0.657263174351002|11.308902096679
rs7617454	3:179420095-179420820	3	179420591	C	T	0.078947	0.139592	1	1	12.6425	0.370019	0.000913	0.480474	21.2751	5.16888	6	6	2.36397	0	0.965482	0.985137	0.000377073	0.00226244	ENSG00000239894	-45525	10_Active_enhancer_2	1	1	0	0	1	1	1	1	GR_known3|0|-11.966261290184|14|+|5.908265683168|-6.05799560701601
rs11102732	1:114650197-114650381	1	114650259	T	A	0.342105	0.051986	0.951043	0.951043	10.5957	0.670032	0.00028	0.697459	15.7532	2.91137	1	2	0	0	0.933449	0.933449	0.00113352	0.00226705	ENSG00000134207	46344	17_Weak_repressed_polycomb	0	0	0	0	0	0	0	0	1
rs5802630	13:32583474-32583768	13	32583745	C	CTTTGTTTG	0.421053	0.120222	0.997225	0.997225	11.3428	0.724028	0.000641	0.483275	11.6615	2.85084	1	3	0	0	0.949832	0.987369	0.000757417	0.00227225	ENSG00000073910	-21964	6_Weak_transcription	1	0	0	0	0	0	0	0	Foxa_known2|0|15.29060512113|3|+|-3.96930179229|11.32130332884
rs7487580	12:7613093-7613466	12	7613402	C	T	0.157895	0.824653	0.995539	0.995539	10.5881	0.329297	4.7e-05	0.308177	16.0199	3.903	2	2	0.744646	0	0.948866	0.916018	0.00113816	0.00227633	ENSG00000177675	-16344	17_Weak_repressed_polycomb	0	0	0	1	0	0	0	1	CTCFL_disc1|0|-11.902662535104|6|+|9.68277327864|-2.219889256464
rs513830	11:92360877-92361262	11	92361126	T	C	0.552632	0.033543	1	1	10.578	0.328452	5.8e-05	0.470126	12.6598	4.22855	2	2	1.35377	0	0.982386	0.973988	0.0011444	0.00228879	ENSG00000239086	101704	10_Active_enhancer_2	0	0	1	0	0	1	0	0	Bach1|0|-11.96622056942|11|-|6.56468849713001|-5.40153207229
rs6424239	1:232758175-232758372	1	232758337	G	A	0.5	0.052632	0.972188	0.972188	9.29957	0.348179	4.1e-05	0.395438	11.4478	3.50786	3	1	0.25677	0	0.981732	0.96691	0.00229207	0.00229207	ENSG00000116991	-60871	10_Active_enhancer_2	0	0	0	0	0	0	0	1	1
rs2282063	13:44806205-44806732	13	44806375	A	G	0.473684	0.459753	1	1	11.3262	0.358127	4.5e-05	0.393018	14.8096	4.25103	3	3	0	0	0.989861	0.987534	0.000764222	0.00229267	ENSG00000230731	3990	10_Active_enhancer_2	0	0	1	1	0	0	0	0	BATF_disc1|0|-11.966119348176|5|-|11.746290017836|-0.219829330340005
rs1434084	2:179192400-179193050	2	179192592	C	A	0.657895	0.051986	1	1	10.57	0.653275	4.5e-05	0.589892	13.1917	3.49548	3	2	0.097489	0	0.994036	0.993621	0.00114937	0.00229874	ENSG00000223960	-86267	6_Weak_transcription	1	0	1	0	0	0	0	0	NA
rs2340860	2:151454988-151455273	2	151455164	G	A	0.631579	5.69785	0.979498	0.979498	9.28097	0.702892	0.02837	0.639205	5.34064	2.52268	1	1	0	0	0.977334	0.977334	0.00231547	0.00231547	ENSG00000224048	-13908	6_Weak_transcription	0	0	0	0	0	0	0	0	RXRA_disc1|0|11.192749342236|9|+|1.675383552722|12.868132894958
rs1114164	2:197561055-197561689	2	197561252	G	A	0.526316	0.459753	0.983717	0.983717	9.27627	0.621452	4e-05	0.473671	16.9328	4.71776	1	1	-1.5e-05	0	0.982764	0.982764	0.00232142	0.00232142	ENSG00000212591	-10001	6_Weak_transcription	1	0	0	0	1	0	1	1	Hoxb3|0|3.39528216203999|17|+|8.71186243308|12.10714459512
rs6748644	2:174877466-174878348	2	174878045	T	A	0.5	1.31579	0.995345	0.995345	10.551	0.390198	0.000146	0.410181	28.6206	4.09833	2	2	0	0	0.993589	0.992498	0.00116125	0.0023225	ENSG00000235414	-30271	10_Active_enhancer_2	0	0	0	0	1	1	0	0	ERalpha-a_disc3|0|-4.369584394845|7|-|11.123576378145|6.7539919833
rs7715410	5:66807728-66808080	5	66807910	C	A	0.473684	0.459753	0.977106	0.977106	9.26881	0.380409	8.4e-05	0.523506	26.2657	3.55318	1	1	0	0	0.974494	0.974494	0.00233088	0.00233088	ENSG00000222939	-47292	18_Quiescent/low_signal	1	1	0	0	0	0	0	0	NF-I_2|0|-1.13456258838|3|+|11.459090279656|10.324527691276
rs4266664	8:52033580-52033873	8	52033866	T	C	0.578947	0.353306	0.999677	0.999677	11.2921	0.680773	0.007803	0.545906	7.05198	3.02211	3	3	2.12916	0	0.96137	0.994736	0.000778374	0.00233512	ENSG00000201316	105998	18_Quiescent/low_signal	1	0	0	0	0	0	0	0	NA
rs9637624	4:120274434-120275217	4	120274911	A	G	0.552632	0.033543	0.965856	0.965856	14.1621	0.344862	0.004667	0.343778	10.9943	4.09386	12	14	-0.000382	0	0.954948	0.962838	0.000167717	0.00234803	ENSG00000201186	-14284	18_Quiescent/low_signal	1	1	1	0	1	1	1	0	Hoxa5_1|0|-11.857762603734|17|+|10.23178471709|-1.62597788664402
rs7130416	11:1714501-1715502	11	1715332	T	C	0.184211	0.294145	0.982874	0.982874	13.1092	0.616812	0.002322	0.491553	23.3791	4.46737	8	8	5.72305	0	0.979953	0.980633	0.000293849	0.00235079	ENSG00000205864	-3925	2_Weak_TSS	0	0	1	1	1	1	0	0	p300_disc9|0|0.343287394379999|16|-|10.63320917812|10.9764965725
rs1332018	1:110282382-110283424	1	110282972	G	T	0.605263	0.996253	1	1	9.25	0.574773	0.00257	0.520598	44.6054	5.56047	1	1	0	0	0.996595	0.996595	0.00235495	0.00235495	ENSG00000134202	1278	1_Active_TSS	0	0	1	0	1	1	0	0	NA
rs353925	5:77073355-77073607	5	77073534	T	C	0.631579	6.46528	0.998311	0.998311	10.5248	0.340485	0.000108	0.512594	31.4532	4.17174	2	2	0	0	0.987327	0.987378	0.00117784	0.00235568	ENSG00000171530	-1170	6_Weak_transcription	0	0	0	0	0	0	0	0	Irf_disc2|0|-10.923986595819|10|-|13.794660841428|2.870674245609
rs10739415	9:117214575-117215011	9	117214592	T	G	0.315789	0.012492	1	1	10.5238	0.337216	0.016572	0.345201	18.4712	3.32123	2	2	0	0	0.993869	0.988962	0.00117848	0.00235696	ENSG00000095397	53161	6_Weak_transcription	0	0	0	0	0	1	0	1	NA
rs10872138	6:116088048-116088446	6	116088418	A	T	0.368421	0.172336	0.999887	0.999887	9.24265	0.631927	0.000159	0.653017	25.1768	3.30873	1	1	0	0	0.994426	0.994426	0.00236443	0.00236443	ENSG00000217019	12790	18_Quiescent/low_signal	0	0	0	0	0	0	0	0	EBF_known2|0|11.229476718675|6|+|3.00056901661999|14.230045735295
rs6538220	12:90456789-90456961	12	90456868	G	A	0.5	0.473684	1	1	10.5157	0.316068	0.000104	0.461793	10.8454	2.37454	2	2	2.02482	0	0.988345	0.989951	0.00118365	0.00236731	ENSG00000241415	336077	18_Quiescent/low_signal	0	0	0	0	0	0	0	0	RXRA_disc5|0|-11.966134855346|7|-|12.953538928234|0.987404072887998
rs13017109	2:106372231-106372680	2	106372358	A	C	0.289474	0.43618	0.999364	0.999364	11.2535	0.65568	0.007399	0.653551	12.7612	3.82689	3	3	0.260106	0	0.993496	0.990996	0.00079471	0.00238413	ENSG00000071051	10876	10_Active_enhancer_2	1	0	0	0	1	1	0	0	Foxd1_1|0|11.892180871871|11|+|-4.07913535495098|7.81304551692
rs12700826	7:27672667-27673165	7	27672726	G	T	0.868421	1.81521	1	1	11.7828	0.643416	1.4e-05	0.483759	29.4528	4.30455	4	4	0.257262	0	0.99228	0.992696	0.00059782	0.00239128	ENSG00000233400	17073	6_Weak_transcription	1	1	0	0	0	1	0	1	PLZF|0|10.661709542476|24|+|-4.81270771062398|5.84900183185201
rs12054314	3:21377511-21378097	3	21377779	T	G	0.368421	0.325822	1	1	12.5339	0.660574	3.6e-05	0.538227	13.9046	3.58838	7	6	0	0	0.985398	0.989653	0.000399632	0.00239779	ENSG00000236380	-69708	18_Quiescent/low_signal	0	0	0	0	0	0	0	0	Rad21_disc4|0|0.530097532840003|10|-|12.27951337812|12.80961091096
rs11165251	1:95267415-95268154	1	95267890	A	G	0.447368	0.033543	0.987071	0.987071	10.4904	0.594039	7.2e-05	0.555472	22.8264	4.36346	2	2	3.42883	0	0.981862	0.982109	0.00119998	0.00239995	ENSG00000224081	18422	1_Active_TSS	0	0	1	1	1	0	0	0	E2A_3|0|11.073411425088|2|-|1.269572417736|12.342983842824
rs1945863	11:91731319-91732220	11	91731983	C	T	0.684211	4.99671	1	1	10.4856	0.387602	1.3e-05	0.514017	18.9605	5.04666	4	2	0	0	0.996521	0.996921	0.00120307	0.00240615	ENSG00000242248	-162955	10_Active_enhancer_2	1	1	0	0	0	1	1	1	TCF12_disc2|0|-6.27360209359|4|+|12.028891107415|5.75528901382501
rs35783378	4:77105392-77105548	4	77105422	C	T	0.157895	0.824653	0.999802	0.999802	9.20738	0.653106	0.000135	0.535829	24.2529	2.90426	1	1	0	0	0.992905	0.992905	0.00241041	0.00241041	ENSG00000138760	29654	6_Weak_transcription	0	0	0	0	0	0	0	0	Dobox4|0|9.15136743628798|8|-|6.58397903271|15.735346468998
rs10132899	14:42938906-42939152	14	42939017	G	A	0.394737	0.996253	1	1	9.20042	0.329673	0.000112	0.336344	5.33772	3.76599	1	1	0	0	0.9964	0.9964	0.00241959	0.00241959	ENSG00000222084	168951	18_Quiescent/low_signal	0	0	0	0	0	1	0	1	NA
rs12421267	11:97622469-97622612	11	97622502	T	G	0.368421	2.42347	0.975797	0.975797	9.19543	0.305822	0.000198	0.523347	12.0613	2.62281	1	1	0	0	0.941834	0.941834	0.0024262	0.0024262	ENSG00000199315	94004	18_Quiescent/low_signal	0	0	0	0	0	0	0	0	DBP|0|-11.51882202672|4|-|10.596283|-0.922539026720003
rs9969466	8:10512374-10512751	8	10512511	G	C	0.447368	0.033543	0.983919	0.983919	9.19322	0.347977	0.0003	0.572159	19.4023	3.27739	1	1	0	0	0.97767	0.97767	0.00242913	0.00242913	ENSG00000171060	-17774	17_Weak_repressed_polycomb	0	0	1	0	1	0	0	0	NA
rs2922452	8:134652579-134653219	8	134652955	C	T	0.315789	1.37722	0.968341	0.968341	9.1914	0.382946	0.000109	0.438032	19.5236	4.43587	1	1	0	0	0.954527	0.954527	0.00243155	0.00243155	ENSG00000212273	4389	10_Active_enhancer_2	1	1	1	0	1	1	1	1	Egr-1_disc4|0|-11.966302684296|6|-|7.011109354712|-4.95519332958401
rs10506539	12:67412852-67413346	12	67412937	C	G	0.078947	0.139592	1	1	11.7508	0.296799	2.5e-05	0.49626	28.9859	3.55541	4	4	2.44513	0	0.975264	0.981907	0.000608173	0.00243269	ENSG00000111530	-250210	18_Quiescent/low_signal	1	0	1	0	1	0	0	0	Pax-6_1|0|-0.999414972899999|8|+|10.3983245901|9.3989096172
rs4724987	7:771774-772267	7	772174	G	A	0.815789	0.968783	1	1	10.4642	0.645198	0.006478	0.474539	19.7739	4.44747	2	2	-90.9675	0	0.992842	0.989724	0.00121713	0.00243427	ENSG00000188191	-4487	10_Active_enhancer_2	1	1	1	1	1	1	0	0	Ik-3|0|11.966159562057|9|+|-0.614966978917991|11.351192583139
rs73139098	12:62875546-62876058	12	62875687	A	G	0.078947	0.139592	0.957192	0.957192	11.208	0.66426	3.8e-05	0.532934	35.3901	4.33443	3	3	0.020105	0	0.992082	0.937223	0.000814454	0.00244336	ENSG00000246324	3176	6_Weak_transcription	1	1	0	0	0	0	0	0	Foxa_disc1|0|11.966094460032|4|+|2.65478384580899|14.620878305841
rs34274195	8:27168237-27169426	8	27168902	G	A	0.447368	4.15767	0.999574	0.999574	12.1503	0.573009	0.000809	0.511613	28.9949	6.45038	10	5	18.9436	0	0.996071	0.996953	0.000490804	0.00245402	ENSG00000104228	597	1_Active_TSS	0	0	0	0	1	1	0	1	WT1|0|0.169816032908997|4|-|11.219093967091|11.38891
rs35086485	15:45260301-45260466	15	45260415	A	G	0.289474	2.46609	0.964059	0.964059	10.4428	0.274339	0.000554	0.405732	14.1269	1.69702	2	2	0	0	0.923506	0.959548	0.00123131	0.00246262	ENSG00000167014	11400	18_Quiescent/low_signal	1	0	0	1	1	0	0	0	p300_disc5|0|-7.45826431717799|11|-|13.05055824354|5.592293926362
rs11900272	2:81357435-81357733	2	81357642	T	A	0.078947	0.139592	1	1	9.15833	0.770991	5.4e-05	0.678873	8.87032	2.97749	2	1	0	0	0.743809	0.98095	0.00247588	0.00247588	ENSG00000230571	-63682	17_Weak_repressed_polycomb	1	0	0	0	0	0	0	0	Foxj2_1|0|11.19923467388|9|-|2.00153292028399|13.200767594164
rs1440018	7:12484115-12485013	7	12484649	T	C	0.578947	1.65857	1	1	12.1334	0.668844	0.001042	0.571828	10.6642	4.86482	5	5	0.583808	0	0.980253	0.993947	0.000495268	0.00247634	ENSG00000236048	-26864	10_Active_enhancer_2	1	1	0	0	0	1	1	1	RFX5_disc3|0|11.966219848618|3|+|-6.498298499661|5.46792134895701
rs9610749	22:37812823-37813207	22	37812911	A	G	0.421053	0.353306	0.960791	0.960791	10.4313	0.665645	0.000107	0.580629	9.30652	3.86889	2	2	0	0	0.953627	0.933774	0.00123897	0.00247795	ENSG00000243902	10682	10_Active_enhancer_2	0	0	0	0	0	0	0	0	Sin3Ak-20_disc5|0|11.373159663099|8|-|-0.471760305488999|10.90139935761
rs3752316	20:33865308-33866204	20	33865852	G	A	0.131579	0.43618	1	1	12.1317	0.426434	6e-06	0.46597	42.7771	5.36222	5	5	5.06316	0	0.970515	0.989697	0.000495728	0.00247864	ENSG00000126005	2538	1_Active_TSS	0	0	0	1	1	1	0	0	NA
rs6479744	10:62749187-62749612	10	62749393	T	C	0.5	0.473684	1	1	9.15126	0.343601	6.4e-05	0.461379	14.7632	3.46667	2	1	1.74197	0	0.985486	0.97382	0.00248546	0.00248546	ENSG00000072422	12011	6_Weak_transcription	1	0	0	0	0	0	0	0	Mef2_disc2|0|-11.344926287792|6|-|10.659443314248|-0.685482973543998
rs9828395	3:194403243-194403862	3	194403705	C	G	0.236842	1.82996	0.999854	0.999854	12.4646	0.407093	0.004046	0.502189	36.3235	4.60122	5	6	6.52256	0	0.985609	0.991193	0.000414746	0.00248847	ENSG00000185112	-3380	17_Weak_repressed_polycomb	0	0	1	1	1	0	1	0	NA
rs9297686	8:125152131-125152769	8	125152306	C	T	0.657895	0.051986	0.998835	0.998835	9.14583	0.374783	7.9e-05	0.502017	22.7632	4.20649	1	1	0	0	0.99446	0.99446	0.00249285	0.00249285	ENSG00000232476	-79098	10_Active_enhancer_2	1	1	0	0	1	1	1	1	NA
rs1322323	10:123949926-123950440	10	123950227	G	A	0.710526	2.46609	1	1	10.4103	0.367652	5.9e-05	0.504887	17.9049	4.02064	2	2	0	0	0.995904	0.996404	0.00125315	0.00250629	ENSG00000138152	-80896	6_Weak_transcription	0	1	0	0	0	1	1	1	Maf_disc1|0|-11.966094761964|2|+|16.04336324366|4.077268481696
rs17807317	22:17680208-17680549	22	17680519	A	C	0.421053	2.35783	0.998926	0.998926	9.13593	0.646193	0.000183	0.569297	10.6325	3.24555	1	1	0	0	0.996105	0.996105	0.00250638	0.00250638	ENSG00000236325	6381	1_Active_TSS	0	0	0	0	1	1	0	1	NA
rs331872	3:325918-326475	3	326332	T	A	0.5	0.473684	0.985918	0.985918	11.1447	0.701062	3.9e-05	0.673086	8.45469	3.31324	3	3	0	0	0.983735	0.974719	0.000842731	0.00252819	ENSG00000231660	25087	18_Quiescent/low_signal	0	0	0	0	0	0	0	0	Fox|0|11.85069495324|4|-|0.226326995903989|12.077021949144
rs10833761	11:22518704-22519260	11	22518910	C	T	0.578947	1.65857	0.998815	0.998815	11.6723	0.572467	0.001947	0.529699	27.7248	4.7285	5	4	2.62822	0	0.992757	0.99353	0.00063437	0.00253748	ENSG00000229387	-128354	6_Weak_transcription	0	1	0	0	1	1	1	0	NA
rs112247489	10:33422812-33423611	10	33423262	ATCAG	A	0.078947	0.139592	1	1	12.0813	0.348579	0.000768	0.492697	19.9176	5.52942	5	5	0.000424	0	0.987933	0.972301	0.000509298	0.00254649	ENSG00000233387	-17212	10_Active_enhancer_2	0	1	0	0	1	1	1	0	GATA_known4|0|-8.232357148548|9|-|0.628813532720002|-7.60354361582799
rs2608481	3:103564044-103564352	3	103564231	T	C	0.342105	0.626168	1	1	9.10551	0.36803	0.019127	0.328832	22.677	3.00839	1	1	0	0	0.994887	0.994887	0.0025484	0.0025484	ENSG00000243195	214538	18_Quiescent/low_signal	0	0	0	0	1	0	0	0	ATF2|0|-11.903395477276|8|-|11.839648737976|-0.0637467393000009
rs7911142	10:68805926-68806174	10	68806120	G	A	0.473684	0.459753	1	1	9.10468	0.626767	0.000164	0.532508	25.1105	2.99247	1	1	0	0	0.995726	0.995726	0.00254956	0.00254956	ENSG00000242597	-459	6_Weak_transcription	0	0	0	0	0	0	1	0	DBP|0|11.51882202672|4|+|-0.922539026720003|10.596283
rs72786267	16:50360988-50361385	16	50361170	T	C	0.263158	3.97061	1	1	10.3764	0.627651	3.8e-05	0.599131	22.237	3.49174	3	2	0.002034	0	0.997175	0.996363	0.00127636	0.00255272	ENSG00000238544	25215	6_Weak_transcription	0	0	0	1	0	1	0	1	NA
rs66869073	2:230995451-230995983	2	230995823	A	G	0.263158	0.655306	0.999864	0.999864	10.3758	0.646466	4.3e-05	0.700776	15.033	3.94727	2	2	0	0	0.994653	0.994546	0.0012768	0.00255361	ENSG00000231578	5424	18_Quiescent/low_signal	1	0	0	0	1	1	0	0	NA
rs4969071	17:71134703-71135136	17	71134806	C	T	0.447368	0.554724	1	1	11.6597	0.400585	0.003067	0.494086	21.9159	3.908	4	4	6.11461	0	0.991734	0.993703	0.000638699	0.0025548	ENSG00000180616	-26458	10_Active_enhancer_2	1	1	0	0	0	1	1	0	NA
rs11505161	6:47156110-47156701	6	47156277	A	G	0.105263	0.262976	0.999721	0.999721	11.1237	0.296523	0.026921	0.458567	25.7638	3.9749	1	3	0	0	0.992297	0.983437	0.000852311	0.00255693	ENSG00000146072	121531	10_Active_enhancer_2	1	0	1	0	0	0	0	1	Foxp1|0|-7.80539133796|13|-|-7.58559050962|-15.39098184758
rs78812269	5:110990810-110991541	5	110991010	T	C	0.078947	0.139592	1	1	11.1004	0.308418	3.9e-05	0.469693	28.4603	4.11094	2	3	0	0	0.992883	0.984225	0.000863106	0.00258932	ENSG00000244333	64948	18_Quiescent/low_signal	1	0	0	0	0	0	0	0	Foxd1_1|0|-11.966138526682|5|+|10.761000637997|-1.205137888685
rs26212	5:14510319-14511072	5	14510965	C	T	0.447368	0.033543	1	1	11.6345	0.408936	2.2e-05	0.508227	28.6834	4.71857	4	4	0	0	0.99545	0.995062	0.000647405	0.00258962	ENSG00000145569	-71566	6_Weak_transcription	1	0	1	1	1	1	1	1	NA
rs1990753	2:15612379-15612765	2	15612403	G	C	0.710526	0.43618	1	1	11.0837	0.679646	0.000134	0.628136	22.9133	3.26184	3	3	0	0	0.990468	0.99138	0.000870882	0.00261264	ENSG00000229087	-74473	6_Weak_transcription	1	0	0	0	0	1	1	0	SREBP_disc1|0|11.81229383358|9|-|-2.70293622864|9.10935760494
rs16943234	16:87781486-87782015	16	87781726	T	C	0.105263	0.262976	1	1	11.615	0.325065	1.7e-05	0.576412	21.7232	3.73122	4	4	0	0	0.974438	0.987471	0.000654221	0.00261688	ENSG00000104731	18117	10_Active_enhancer_2	1	1	0	1	0	1	1	1	Irx|0|-1.97748755532|17|+|12.29498954914|10.31750199382
rs56970346	2:17534343-17535017	2	17534765	GCA	G	0.552632	0.033543	0.988235	0.988235	9.05641	0.400623	0.01	0.5	39.7193	4.30324	0	1	0	0	1	0.972129	0.00261775	0.00261775	ENSG00000236348	-32016	10_Active_enhancer_2	1	1	0	0	1	1	1	1	Gm397|0|-6.439911055884|9|-|14.662042178376|8.22213112249201
rs76904460	12:39688474-39689064	12	39688824	A	C	0.157895	0.667969	1	1	10.3298	0.654246	3e-05	0.503571	20.2964	4.0453	4	2	0.326752	0	0.97675	0.989432	0.00130897	0.00261794	ENSG00000139116	148718	6_Weak_transcription	0	0	0	0	0	0	0	0	E2F_disc8|0|10.534565739225|3|-|0.457966011780002|10.992531751005
rs78241984	5:2227778-2227918	5	2227846	T	C	0.236842	0.006973	0.947413	0.947413	11.0788	0.640506	7.3e-05	0.491002	18.7639	2.87298	3	3	1.67542	0	0.937405	0.906604	0.000873201	0.0026196	ENSG00000201026	42953	10_Active_enhancer_2	0	0	0	0	1	0	0	0	Myc_disc9|0|11.343016842091|4|-|-0.506098055691012|10.8369187864
rs2124106	10:16783356-16783926	10	16783674	C	A	0.184211	0.968783	1	1	9.04911	0.321221	4e-05	0.49326	15.2898	4.1478	1	1	0	0	0.991397	0.991397	0.00262823	0.00262823	ENSG00000246160	-9525	6_Weak_transcription	1	1	0	0	0	1	1	0	NA
rs6838366	4:185858549-185859266	4	185858647	G	C	0.263158	0.655306	1	1	12.3623	0.361902	5e-05	0.462038	16.1179	3.96646	5	6	5.5e-05	0	0.993096	0.993175	0.000438087	0.00262852	ENSG00000232033	50680	18_Quiescent/low_signal	1	1	1	0	1	1	1	1	Fox|0|-0.999278277270008|1|+|11.081400425598|10.082122148328
rs4072518	3:31275649-31275952	3	31275859	C	T	0.078947	7.73614	0.817368	0.817368	9.04176	0.264658	0.01	0.5	9.10844	3.53349	0	1	0	0	1	0.747016	0.00263881	0.00263881	ENSG00000222983	5441	10_Active_enhancer_2	0	0	0	0	1	1	0	0	RFX5_disc1|0|-11.966248536682|2|+|15.098369638656|3.13212110197399
rs11177432	12:69374552-69374961	12	69374799	A	G	0.5	0.473684	0.996377	0.996377	11.0627	0.668407	4.6e-05	0.54542	14.5947	2.43279	5	3	10.1743	0	0.986581	0.983434	0.000880826	0.00264248	ENSG00000135678	-47888	18_Quiescent/low_signal	0	0	0	0	0	0	0	0	SP1_disc2|0|0.484568289589987|7|-|12.26002467507|12.74459296466
rs111804875	6:14117379-14118474	6	14118034	G	A	0.131579	0.43618	0.928399	0.928399	11.0603	0.395169	1.5e-05	0.453599	42.3975	5.54518	3	3	0.575867	0	0.90514	0.867696	0.000881956	0.00264587	ENSG00000112149	-494	2_Weak_TSS	0	0	0	1	1	1	0	0	p300_disc9|0|-2.84277861882001|8|+|11.75901660874|8.91623798991999
rs7434835	4:172877981-172878301	4	172877987	G	A	0.657895	8.00851	0.994823	0.994823	10.3052	0.613241	0.003181	0.724185	29.7102	3.18201	3	2	0	0	0.994769	0.995046	0.00132657	0.00265313	ENSG00000174473	142248	18_Quiescent/low_signal	0	0	0	0	1	0	0	0	ATF2|0|11.966095427116|1|-|-0.126446689139996|11.839648737976
rs1837328	1:85462356-85464151	1	85462909	G	C	0.578947	0.120222	1	1	13.2998	0.563305	0.002628	0.471689	39.7662	5.46635	15	10	8.82452	0	0.982046	0.995539	0.000265428	0.00265428	ENSG00000153898	440	2_Weak_TSS	0	0	0	0	1	0	0	0	NA
rs204518	9:118906409-118906988	9	118906511	A	G	0.657895	3.27834	0.901593	0.901593	9.01927	0.636527	0.000138	0.594664	21.3076	2.94115	1	1	0	0	0.898019	0.898019	0.00267148	0.00267148	ENSG00000182752	-9675	17_Weak_repressed_polycomb	0	0	0	0	0	0	0	0	GR_known8|0|11.966188455375|11|+|-4.00432383662499|7.96186461875001
rs3904088	6:87930663-87930903	6	87930777	C	A	0.552632	1.23453	0.999574	0.999574	9.01365	0.318795	0.000217	0.545306	6.9245	2.69897	1	1	0	0	0.995581	0.995581	0.0026797	0.0026797	ENSG00000218313	-46642	6_Weak_transcription	0	0	0	0	0	0	0	0	Crx_1|0|-1.45795389393|10|-|12.566634417666|11.108680523736
rs1352657	3:67452443-67453022	3	67453018	G	A	0.315789	0.012492	1	1	11.5649	0.617708	4.2e-05	0.465435	35.2609	3.76475	5	4	0.382159	0	0.987666	0.994069	0.000672102	0.00268841	ENSG00000241884	105718	10_Active_enhancer_2	1	1	0	0	0	1	0	0	NA
rs3858526	11:5959636-5960101	11	5959757	A	C	0.236842	1.82996	1	1	12.8548	0.665276	7.1e-05	0.382896	7.43227	3.33153	7	8	6.50319	0	0.988561	0.982388	0.000336607	0.00269285	ENSG00000132256	213	17_Weak_repressed_polycomb	0	0	0	0	0	0	0	0	STAT_known15|0|3.69431989359801|22|-|7.084847507341|10.779167400939
rs9308637	2:123314930-123315081	2	123315041	C	T	0.526316	0.459753	0.999052	0.999052	9.00161	0.292226	0.000445	0.398427	4.19572	2.18732	1	1	0	0	0.99387	0.99387	0.00269742	0.00269742	ENSG00000237856	-507968	18_Quiescent/low_signal	0	0	0	0	0	0	1	0	NA
rs1425973	4:138233505-138233971	4	138233578	G	A	0.131579	0.43618	1	1	8.99294	0.289818	7.9e-05	0.41954	14.6557	3.11946	2	1	0	0	0.978954	0.986715	0.00271025	0.00271025	ENSG00000222526	84222	18_Quiescent/low_signal	0	0	0	0	0	0	0	0	Bach1|0|-11.18881772372|8|+|6.11793209782|-5.07088562589999
rs1526595	3:54928243-54928594	3	54928496	T	C	0.736842	2.42347	1	1	11.5433	0.659756	3.9e-05	0.450308	32.9028	3.3872	5	4	0.325545	0	0.995197	0.989827	0.00067993	0.00271972	ENSG00000243715	7039	6_Weak_transcription	0	1	1	1	0	0	1	0	NA
rs35726239	5:10997609-10998400	5	10998153	T	A	0.236842	1.40601	1	1	11.534	0.364957	0.004953	0.464272	22.9519	4.06142	3	4	5.6397	0	0.995506	0.99435	0.00068334	0.00273336	ENSG00000207312	-29704	18_Quiescent/low_signal	1	0	0	0	0	0	0	0	Foxc1_1|0|-11.966243084117|9|+|9.95372405087001|-2.01251903324699
rs12824805	12:82567950-82569160	12	82568575	T	A	0.236842	1.40601	0.898898	0.898898	10.9992	0.399009	0.001156	0.495444	28.4724	5.34719	3	3	0	0	0.911565	0.882313	0.000911524	0.00273457	ENSG00000221121	168539	18_Quiescent/low_signal	1	1	0	1	0	1	1	1	CEBPB_known3|0|-1.782528599032|3|-|10.705012454448|8.922483855416
rs554216898	11:6947331-6948381	11	6948376	C	C	0.342105	0.051986	0.951502	0.951502	11.5171	0.614118	0.002882	0.516318	18.2263	4.86214	4	4	1.21981	0	0.950895	0.894187	0.000689601	0.00275841	ENSG00000149054	-324	17_Weak_repressed_polycomb	0	0	0	0	1	0	0	0	NA
rs11466741	5:110408638-110409308	5	110408705	C	T	0.315789	0.012492	0.999392	0.999392	10.9717	0.385331	0.003268	0.449328	24.9835	4.6391	3	3	3.17341	0	0.933554	0.99416	0.000925138	0.00277541	ENSG00000145777	2859	14_Bivalent/poised_TSS	0	0	0	0	1	0	0	0	BDP1_disc1|0|-5.47559249507|16|-|1.86346969977203|-3.61212279529798
rs4593399	6:113140556-113140754	6	113140667	C	T	0.605263	0.85067	0.999671	0.999671	10.2184	0.706446	0.012135	0.60198	6.14334	2.77507	2	2	0	0	0.990064	0.992252	0.00139049	0.00278097	ENSG00000201386	-152140	18_Quiescent/low_signal	1	1	0	0	0	0	1	0	NA
rs821556	7:62528626-62528922	7	62528791	A	G	0.684211	1.37722	0.994894	0.994894	8.9428	0.35371	0.000242	0.466459	16.2418	2.80061	1	1	0	0	0.990481	0.990481	0.00278565	0.00278565	ENSG00000233454	10794	17_Weak_repressed_polycomb	0	0	0	0	0	0	0	0	SP1_known4|0|-1.58362691338401|10|-|14.270186|12.686559086616
rs33684	5:16508700-16509549	5	16508898	T	C	0.684211	0.902531	1	1	11.9074	0.61319	0.006228	0.557719	28.452	5.29652	5	5	3.45289	0	0.979335	0.993315	0.000559113	0.00279556	ENSG00000173545	-42799	1_Active_TSS	1	0	1	0	1	1	0	0	Foxk1|0|0.0782331404879955|3|+|11.68984897795|11.768082118438
rs151118863	5:66700240-66700993	5	66700677	ATTGT	A	0.473684	0.058642	0.999895	0.999895	10.2041	0.338051	7.7e-05	0.613225	16.5058	3.8693	1	2	0	0	0.973428	0.992402	0.00140132	0.00280265	ENSG00000222939	60196	18_Quiescent/low_signal	1	0	1	0	1	0	1	1	Fox|0|-25.01993091273|2|+|17.63374052151|-7.38619039122001
rs6922559	6:119629320-119629756	6	119629496	G	A	0.394737	0.996253	1	1	10.9483	0.414937	1.2e-05	0.480193	20.9998	4.91579	3	3	0.013301	0	0.995642	0.996593	0.000936893	0.00281068	ENSG00000200732	-19127	10_Active_enhancer_2	0	0	0	0	0	0	0	1	Foxd1_1|0|-11.966138526682|6|+|6.10556878860601|-5.86056973807599
rs2704814	3:71400185-71400778	3	71400483	A	G	0.263158	0.139592	1	1	10.9362	0.635484	5.3e-05	0.431305	23.3261	4.05964	4	3	0	0	0.996169	0.994327	0.000943009	0.00282903	ENSG00000244203	61264	6_Weak_transcription	1	0	0	0	0	1	0	1	NA
rs74953456	2:168733577-168734163	2	168733928	G	A	0.131579	0.43618	0.99977	0.99977	10.1848	0.380888	1.9e-05	0.481578	30.2997	4.71639	2	2	0	0	0.994486	0.989741	0.00141604	0.00283209	ENSG00000235335	23715	10_Active_enhancer_2	1	1	1	0	1	1	1	1	BCL_disc4|0|-1.190732792592|2|+|11.631249144842|10.44051635225
rs3767812	1:118155184-118155988	1	118155620	G	A	0.315789	0.012492	1	1	10.1826	0.390126	7.4e-05	0.373113	35.4891	4.70955	1	2	0	0	0.995082	0.995082	0.00141775	0.0028355	ENSG00000183508	6627	10_Active_enhancer_2	1	1	0	0	0	1	0	1	1
rs6485427	11:12087714-12088103	11	12087978	G	A	0.763158	1.40601	1	1	11.4614	0.636957	3.1e-05	0.492966	23.6147	3.62728	4	4	2.79351	0	0.983263	0.995443	0.000710551	0.0028422	ENSG00000133816	-44425	6_Weak_transcription	0	0	0	0	0	0	0	0	Myf_1|0|10.551679743074|2|-|-1.39769640078801|9.153983342286
rs36002505	11:859680-860105	11	859915	C	T	0.447368	1.23453	0.995978	0.995978	8.90179	0.400118	7.2e-05	0.495897	29.8699	4.02806	1	1	0.733933	0	0.991648	0.991648	0.00284891	0.00284891	ENSG00000214063	16867	10_Active_enhancer_2	0	0	0	0	1	1	0	0	Myc_disc10|0|-11.217739414443|1|-|11.485979188987|0.268239774544
rs568710798	1:2479566-2480491	1	2480246	C	A	0.157895	0.824653	0.745412	0.745412	10.1663	0.30767	0.018527	0.388179	13.9024	4.82485	4	2	19.1357	0	0.785917	0.424101	0.00143031	0.00286062	ENSG00000157873	-7513	10_Active_enhancer_2	0	0	0	1	1	1	0	0	NA
rs6657814	1:68000341-68000649	1	68000580	T	A	0.631579	2.42347	0.965319	0.965319	8.88745	0.377315	0.000126	0.457368	36.8213	4.02738	1	1	0	0	0.91049	0.91049	0.00287138	0.00287138	ENSG00000235200	5027	6_Weak_transcription	1	0	0	0	0	0	0	1	1
rs7247971	19:56060606-56061474	19	56060780	G	A	0.184211	0.294145	0.997903	0.997903	13.1402	0.611908	1.6e-05	0.487858	32.767	4.25488	13	10	2.09771	0	0.934734	0.992311	0.00028902	0.0028902	ENSG00000231274	-3697	10_Active_enhancer_2	1	0	0	0	1	1	0	0	SP1_known3|0|10.381994900992|8|-|-0.499173543488013|9.88282135750399
rs1600178	5:51859049-51859437	5	51859242	C	T	0.368421	0.325822	1	1	10.1458	0.321675	7.7e-05	0.52519	17.0842	2.84253	2	2	0.002619	0	0.94675	0.982584	0.00144633	0.00289265	ENSG00000213949	-224706	10_Active_enhancer_2	0	0	0	0	0	0	0	0	Ets_disc8|0|-11.96613437787|3|+|12.505611824974|0.539477447104005
rs7897391	10:69550764-69551373	10	69551042	C	T	0.736842	2.42347	0.962803	0.962803	10.8891	0.348035	0.008824	0.512655	23.8578	4.78112	2	3	0	0	0.934297	0.916151	0.000967316	0.00290195	ENSG00000225922	-2765	10_Active_enhancer_2	1	1	1	0	1	0	1	0	NA
rs6941694	6:113920611-113920882	6	113920726	C	G	0.315789	0.902531	0.999392	0.999392	10.1363	0.619818	0.013831	0.489786	15.4755	3.48054	2	2	1.29847	0	0.989892	0.992454	0.00145377	0.00290754	ENSG00000218208	17907	6_Weak_transcription	1	0	0	0	0	0	0	0	Foxp1|0|4.61792886937997|14|-|-3.72286375477998|0.895065114599987
rs770574	11:99883774-99884249	11	99883985	T	A	0.552632	0.033543	0.997036	0.997036	10.8836	0.344895	0.007857	0.495788	10.4138	3.9855	3	3	1.61671	0	0.992247	0.993987	0.000970175	0.00291053	ENSG00000149972	193510	18_Quiescent/low_signal	1	1	0	0	0	0	1	0	HNF1_5|0|-9.861922115016|3|+|10.384081043908|0.522158928891997
rs2830997	21:28922484-28923023	21	28922769	A	G	0.315789	0.012492	1	1	10.8747	0.676856	9.9e-05	0.408791	14.0021	3.68378	3	3	0	0	0.991455	0.994271	0.000974885	0.00292466	ENSG00000219592	58027	18_Quiescent/low_signal	1	0	0	0	0	0	0	0	AP-3|0|11.966161756896|2|-|-0.593506867583997|11.372654889312
rs6081645	20:19532866-19533232	20	19532930	A	G	0.763158	1.82996	0.999564	0.999564	8.85281	0.66885	0.000141	0.683467	22.876	3.6066	1	1	0	0	0.983428	0.983428	0.00292638	0.00292638	ENSG00000216017	-37876	9_Active_enhancer_1	0	0	0	0	1	0	0	1	NRSF_known3|0|8.74676508520503|2|+|-8.88140464009001|-0.134639554884984
rs9349280	6:44300158-44300707	6	44300585	G	A	0.763158	1.82996	0.998124	0.998124	8.84939	0.684913	0.000156	0.556139	13.4047	3.74092	1	1	0	0	0.98404	0.98404	0.00293187	0.00293187	ENSG00000157606	-10329	17_Weak_repressed_polycomb	0	0	0	0	1	0	1	0	Pax-6_2|0|11.82875267675|2|-|-0.371490257499985|11.45726241925
rs73390213	15:48670542-48670697	15	48670651	A	G	0.105263	0.262976	1	1	10.1148	0.321814	5.7e-05	0.45719	9.2237	2.76644	2	2	3.40455	0	0.995471	0.985292	0.00147082	0.00294163	ENSG00000246076	-46499	17_Weak_repressed_polycomb	0	0	0	0	0	0	1	1	NA
rs12639160	3:106705315-106705849	3	106705623	T	C	0.184211	0.294145	0.999825	0.999825	8.83688	0.669216	0.000189	0.57266	11.7589	3.61088	1	1	0	0	0.992959	0.992959	0.00295204	0.00295204	ENSG00000241876	-21101	18_Quiescent/low_signal	1	0	0	0	0	0	0	1	Myf_1|0|11.966144000832|1|+|-0.432404261186008|11.533739739646
rs1347910	11:109356929-109357296	11	109357059	A	G	0.631579	0.172336	0.945104	0.945104	10.106	0.630335	5.5e-05	0.583143	20.95	3.70628	2	2	0	0	0.958718	0.900822	0.00147785	0.0029557	ENSG00000185742	64002	18_Quiescent/low_signal	1	1	0	0	0	0	0	0	Nkx2_8|0|11.644307048448|8|+|1.64521619968001|13.289523248128
rs3176806	12:9903084-9904446	12	9904074	C	A	0.210526	2.55444	0.999053	0.999053	11.8007	0.369677	0.015965	0.308109	35.2152	4.7119	5	5	-0.000155	0	0.971592	0.952535	0.000592073	0.00296037	ENSG00000110848	10413	17_Weak_repressed_polycomb	1	1	0	1	0	0	1	0	CTCF_disc5|0|-11.5696351689|2|+|11.581096713314|0.0114615444139901
rs17296401	10:33428061-33428185	10	33428131	A	T	0.342105	0.051986	1	1	8.82905	0.638865	0.015194	0.543531	23.278	3.20122	1	1	0	0	0.992375	0.992375	0.00296472	0.00296472	ENSG00000233387	-22461	10_Active_enhancer_2	1	0	0	0	0	0	0	0	Sin3Ak-20_disc3|0|11.966082191085|4|-|-3.030228323944|8.93585386714099
rs6843070	4:87812762-87813953	4	87813717	C	T	0.552632	0.033543	0.992651	0.992651	12.6616	0.569112	6e-06	0.515001	49.446	5.53792	7	8	0.097426	0	0.970269	0.98914	0.000373249	0.00298599	ENSG00000243312	21417	1_Active_TSS	0	0	0	0	1	1	0	0	TLX1::NFIC|0|11.9662088373|2|+|-6.19519326093599|5.77101557636401
rs2611493	10:51488761-51489813	10	51489215	C	T	0.526316	2.55444	0.733212	0.733212	13.8323	0.565406	0.003729	0.458622	21.0428	5.46703	19	15	6.19502	0	0.721207	0.710247	0.000199874	0.00299811	ENSG00000204169	-2162	3_Flanking_TSS	0	0	0	0	1	0	0	0	NA
rs1548518	12:48152451-48153376	12	48152995	G	A	0.368421	0.172336	0.999548	0.999548	12.1138	0.431684	7e-06	0.525022	39.2348	5.59654	6	6	2.2116	0	0.983186	0.995977	0.000500502	0.00300301	ENSG00000079337	410	1_Active_TSS	1	0	0	1	1	1	0	0	ERalpha-a_disc4|0|-10.809909632674|7|+|10.396107040351|-0.413802592322995
rs6911807	6:133827410-133827786	6	133827595	A	G	0.184211	0.968783	1	1	10.8217	0.676967	0.006792	0.56559	10.1942	3.2596	3	3	1.18308	0	0.937356	0.988443	0.00100315	0.00300945	ENSG00000238059	4421	18_Quiescent/low_signal	1	1	0	0	0	0	1	0	AP-4_1|0|9.64548838422002|2|-|-0.73159435157001|8.91389403265001
rs33423	5:71880277-71880840	5	71880536	A	G	0.657895	0.626168	0.999649	0.999649	10.0715	0.629281	3.1e-05	0.541944	18.8154	4.17481	2	2	0	0	0.994812	0.995831	0.00150584	0.00301168	ENSG00000178175	-77031	10_Active_enhancer_2	1	1	0	1	1	1	1	1	NA
rs613355	6:154449628-154449929	6	154449850	C	A	0.710526	0.206997	0.998979	0.998979	10.0644	0.695335	0.000121	0.561972	8.73703	2.77654	2	2	0	0	0.993661	0.993639	0.0015116	0.00302319	ENSG00000237593	-88438	18_Quiescent/low_signal	1	0	0	0	0	0	0	0	Foxa_known4|0|11.966172686412|9|-|-0.61359007291999|11.352582613492
rs2823170	21:16595127-16595378	21	16595314	T	A	0.657895	0.626168	0.978438	0.978438	8.79227	0.707369	0.000227	0.576197	3.33123	2.87569	1	1	0	0	0.918746	0.918746	0.0030251	0.0030251	ENSG00000236471	155735	18_Quiescent/low_signal	0	0	0	0	0	0	0	0	BATF_disc1|0|11.966215221324|11|+|-0.261054783979986|11.705160437344
rs28523940	8:144360855-144361027	8	144360902	C	T	0.447368	0.033543	0.997875	0.997875	8.79219	0.635159	0.000134	0.576958	14.9862	3.4914	1	1	0	0	0.994978	0.994978	0.00302523	0.00302523	ENSG00000185730	-12705	10_Active_enhancer_2	0	0	0	0	0	0	0	0	STAT_known10|0|0.833730122269003|21|-|5.60142696994301|6.43515709221201
rs4286678	5:33354545-33354802	5	33354616	G	C	0.684211	0.012492	0.970541	0.970541	8.79218	0.659176	0.000146	0.513779	12.2254	3.6548	1	1	0	0	0.956855	0.956855	0.00302525	0.00302525	ENSG00000239678	-76486	18_Quiescent/low_signal	1	0	1	0	0	0	0	0	Sox_4|0|2.31652125833|15|-|9.29051107630001|11.60703233463
rs989510	8:118313452-118314006	8	118313745	A	T	0.157895	0.824653	0.999407	0.999407	11.3455	0.404193	6e-06	0.492936	25.1601	4.78704	5	4	0.226117	0	0.990597	0.993413	0.000756316	0.00302526	ENSG00000240151	137183	10_Active_enhancer_2	1	1	0	0	0	1	1	1	AP-1_disc7|0|-11.124564820824|10|+|11.901520438204|0.776955617379997
rs76334266	2:191272484-191273846	2	191272784	T	G	0.236842	1.82996	0.995893	0.995893	11.7583	0.414064	0.001629	0.559173	32.7371	6.38969	3	5	2.96001	0	0.989642	0.982743	0.000605716	0.00302858	ENSG00000151690	-598	1_Active_TSS	0	0	0	0	1	1	0	0	NA
rs1999802	13:89459408-89460369	13	89459884	A	C	0.684211	0.012492	1	1	10.0549	0.337876	0.000379	0.459211	13.8124	3.93176	1	2	0	0	0.994048	0.994048	0.00151942	0.00303884	ENSG00000233211	171631	18_Quiescent/low_signal	1	0	0	0	0	0	0	0	Foxo_1|0|-11.966159879059|7|-|12.95925903201|0.99309915295099
rs2205748	6:104462251-104462777	6	104462555	A	G	0.578947	0.353306	1	1	10.0536	0.643437	0.000132	0.556035	17.8067	3.1487	2	2	0	0	0.986557	0.994354	0.00152047	0.00304094	ENSG00000216817	5372	18_Quiescent/low_signal	0	0	0	0	0	0	0	0	NA
rs2937774	5:73420728-73420855	5	73420817	T	A	0.710526	0.206997	1	1	8.77426	0.674826	0.030776	0.61434	7.78424	2.86396	1	1	0	0	0.993254	0.993254	0.00305511	0.00305511	ENSG00000241963	50754	18_Quiescent/low_signal	0	0	0	0	0	0	0	0	Foxa_known4|0|11.904771271092|6|-|-0.137066932064002|11.767704339028
rs12585041	13:107124253-107124885	13	107124824	G	A	0.263158	0.655306	0.987151	0.987151	8.77077	0.39206	1.7e-05	0.537899	18.3808	4.87115	3	1	0.01816	0	0.977889	0.984709	0.00306096	0.00306096	ENSG00000174418	46131	10_Active_enhancer_2	0	0	0	0	1	0	0	0	Roaz_1|0|-11.96617970008|11|+|-9.14299690472001|-21.1091766048
rs61821370	1:197304809-197305309	1	197305053	T	G	0.421053	1.65857	0.958671	0.958671	10.7881	0.314936	5.2e-05	0.258265	12.9625	3.53383	2	3	0	0	0.960741	0.896454	0.00102152	0.00306456	ENSG00000221879	-28139	18_Quiescent/low_signal	0	0	0	1	1	0	0	0	1
rs10825005	10:51815300-51815628	10	51815364	G	C	0.368421	0.172336	0.965332	0.965332	10.0391	0.328878	0.0004	0.389347	6.38175	3.04164	2	2	1.71901	0	0.903891	0.840723	0.00153252	0.00306503	ENSG00000239769	7836	18_Quiescent/low_signal	0	0	0	0	0	0	0	0	NA
rs889904	2:118860184-118860614	2	118860471	C	T	0.368421	0.325822	1	1	10.0255	0.650635	5.1e-05	0.528388	18.2004	3.42154	3	2	-1e-06	0	0.98831	0.98887	0.00154388	0.00308776	ENSG00000227572	9591	6_Weak_transcription	0	0	0	0	0	0	0	0	NA
rs12621161	2:153683477-153683734	2	153683524	A	G	0.315789	1.37722	0.999878	0.999878	10.0247	0.686768	0.000109	0.598686	7.33066	3.06579	2	2	0	0	0.995474	0.995812	0.00154455	0.0030891	ENSG00000234932	23861	18_Quiescent/low_signal	1	0	0	0	0	0	0	0	NA
rs16879799	6:85725065-85725571	6	85725278	C	T	0.105263	0.262976	1	1	10.7651	0.344156	1.6e-05	0.565319	38.4725	4.10379	3	3	0.273596	0	0.996508	0.988032	0.00103433	0.003103	ENSG00000216523	-48722	17_Weak_repressed_polycomb	0	0	0	1	0	0	0	0	BDP1_disc1|0|-1.82871413554597|9|-|3.738904872262|1.91019073671603
rs6462450	7:33074248-33074617	7	33074356	C	T	0.684211	0.012492	0.979793	0.979793	8.74325	0.354583	0.000126	0.443626	14.3404	3.49173	1	1	0	0	0.973174	0.973174	0.00310751	0.00310751	ENSG00000229054	1746	10_Active_enhancer_2	0	0	0	0	0	0	1	1	Pax-3_1|0|-11.817249771659|9|+|15.969052169418|4.151802397759
rs35458135	9:6530323-6530888	9	6530652	G	C	0.184211	0.294145	1	1	10.0046	0.325805	4.1e-05	0.462501	14.479	3.89744	2	2	0.380456	0	0.991635	0.992015	0.00156152	0.00312305	ENSG00000237158	-38522	6_Weak_transcription	1	0	0	0	0	0	1	0	NA
rs74435527	5:167737927-167738550	5	167738330	G	GCT	0.736842	0.655306	0.971088	0.971088	11.2858	0.612393	1.4e-05	0.575256	33.9804	4.28492	6	4	1.96106	0	0.97389	0.944743	0.000781041	0.00312416	ENSG00000113645	18861	6_Weak_transcription	0	0	0	0	0	0	0	0	NA
rs2061192	12:42674851-42675493	12	42675269	C	A	0.763158	0.006973	0.962867	0.962867	10.0018	0.391816	2.6e-05	0.411405	43.2132	4.31524	2	2	0	0	0.900443	0.813079	0.00156391	0.00312781	ENSG00000213680	-5863	18_Quiescent/low_signal	1	0	0	0	0	1	0	1	NA
rs9402443	6:132980274-132980719	6	132980526	G	A	0.368421	0.172336	0.99921	0.99921	9.99882	0.630196	4.6e-05	0.46041	21.5546	3.88411	3	2	0	0	0.99276	0.995519	0.0015664	0.00313281	ENSG00000146399	-13132	6_Weak_transcription	1	1	0	0	1	0	0	0	NA
rs56144824	6:76843141-76843848	6	76843525	CA	C	0.263158	0.655306	0.997835	0.997835	8.72838	0.321573	0.01	0.5	8.97671	3.89928	0	1	0	0	1	0.989769	0.00313294	0.00313294	ENSG00000222652	40589	18_Quiescent/low_signal	0	0	0	0	1	0	0	1	CTCFL_disc1|0|-23.732613098022|10|-|9.85449729805801|-13.878115799964
rs241201	8:28633618-28634069	8	28633953	T	G	0.552632	0.033543	0.970135	0.970135	11.6927	0.670582	0.017972	0.467007	9.73779	3.04044	4	5	0	0	0.897998	0.948142	0.000627468	0.00313734	ENSG00000239637	-6350	6_Weak_transcription	1	0	0	0	0	0	0	0	Sox_6|0|11.530178418496|4|-|-1.31388741849599|10.216291
rs2168345	17:17419115-17420028	17	17419338	G	C	0.552632	8.80298	0.994627	0.994627	8.72556	0.422452	0.000191	0.481265	35.9323	4.44309	1	1	0	0	0.994137	0.994137	0.0031378	0.0031378	ENSG00000108551	-19408	10_Active_enhancer_2	1	1	0	0	0	1	1	1	HES1|0|-1.583139502785|14|-|12.310025936445|10.72688643366
rs4857790	3:176431726-176432303	3	176431983	A	T	0.078947	0.139592	1	1	9.99429	0.650535	0.001753	0.548948	30.1539	4.944	2	2	0.01381	0	0.997277	0.985137	0.00157026	0.00314053	ENSG00000243866	-49292	10_Active_enhancer_2	0	1	1	0	0	1	0	1	E4BP4|0|11.96610576942|5|-|0.617408024660008|12.58351379408
rs10459233	12:50973629-50974155	12	50973897	G	C	0.368421	0.172336	0.933639	0.933639	9.99307	0.344764	2e-05	0.578552	11.2846	3.93026	3	2	2.0052	0	0.912757	0.88541	0.0015713	0.0031426	ENSG00000207136	-53428	11_Weak_enhancer	1	0	0	0	0	1	0	0	Myc_known7|0|-11.966224970752|3|-|11.417940977236|-0.548283993516009
rs3911620	10:127095527-127096319	10	127096030	T	C	0.342105	0.626168	0.999069	0.999069	8.72065	0.413516	6.9e-05	0.320573	47.6947	4.56724	1	1	0	0	0.99562	0.99562	0.00314625	0.00314625	ENSG00000233135	66974	10_Active_enhancer_2	1	0	1	0	1	1	1	1	Ets_disc1|0|-11.966128952207|1|-|2.23908849763698|-9.72704045457
rs1466666	5:67632096-67632312	5	67632194	C	G	0.473684	0.459753	1	1	8.71958	0.614867	0.000109	0.567145	26.7444	3.15345	1	1	0	0	0.995714	0.995714	0.00314811	0.00314811	ENSG00000145675	109633	18_Quiescent/low_signal	0	1	0	0	0	0	1	0	TCF12_disc6|0|9.589198074588|3|+|2.20314588411399|11.792343958702
rs62456082	7:20369029-20371727	7	20370231	T	C	0.078947	0.139592	1	1	11.2706	0.396036	0.000805	0.494871	63.8686	6.9649	6	4	0.16525	0	0.967518	0.985137	0.000787433	0.00314973	ENSG00000105855	-1697	1_Active_TSS	1	1	0	1	1	1	0	1	Myf_1|0|-11.288244716178|5|-|11.541883917572|0.253639201393995
rs9952980	18:42888490-42888877	18	42888797	T	C	0.342105	0.626168	0.99849	0.99849	8.71438	0.37417	0.000206	0.489328	29.233	3.20071	1	1	0	0	0.993394	0.993394	0.0031571	0.0031571	ENSG00000132874	-306277	18_Quiescent/low_signal	1	1	0	0	0	0	0	0	DMRT1|0|-11.966105135|6|-|5.15989231231399|-6.80621282268601
rs10103940	8:3584140-3584953	8	3584177	A	G	0.684211	0.012492	0.963325	0.963325	12.3075	0.619306	4.8e-05	0.436321	28.7483	4.02183	7	7	0	0	0.960812	0.936734	0.000451153	0.00315807	ENSG00000222546	26125	17_Weak_repressed_polycomb	0	0	0	1	0	0	0	0	Gcm1|0|5.673060466764|8|-|5.689643420512|11.362703887276
rs9291164	4:72738862-72739436	4	72739287	G	T	0.842105	0.667969	1	1	11.2585	0.354173	6.3e-05	0.437558	26.7833	3.79027	3	4	0.047844	0	0.994387	0.989018	0.000792573	0.00317029	ENSG00000145321	-88783	18_Quiescent/low_signal	1	1	0	0	0	0	0	1	Mef2_known3|0|-9.26771137465001|2|-|11.810603694935|2.54289232028499
rs12995005	2:114616467-114616628	2	114616493	G	A	0.631579	0.325822	1	1	8.70563	0.364829	0.000169	0.51274	30.2464	2.99984	1	1	0	0	0.993782	0.993782	0.00317229	0.00317229	ENSG00000239077	-10654	6_Weak_transcription	0	0	0	0	0	0	0	0	Bach1|0|-11.27567775555|8|+|10.61897223635|-0.656705519199988
rs376138	15:93210104-93211019	15	93210356	T	C	0.342105	1.5558	0.985104	0.985104	12.5443	0.443769	1.6e-05	0.519562	52.6759	5.08359	8	8	1.72623	0	0.956614	0.972949	0.000397411	0.00317929	ENSG00000185442	-11073	10_Active_enhancer_2	1	1	0	1	1	1	1	1	NA
rs57549811	8:128352288-128352765	8	128352601	A	G	0.078947	0.139592	1	1	10.7199	0.276648	5.5e-05	0.530324	24.6368	2.96373	3	3	4.37848	0	0.99326	0.979509	0.00105987	0.0031796	ENSG00000212993	-74846	18_Quiescent/low_signal	0	0	0	0	0	0	0	0	NA
rs80257682	8:6251053-6251283	8	6251139	A	T	0.078947	7.73614	0.957465	0.957465	8.70017	0.325589	5.3e-05	0.482373	18.0617	3.45529	1	1	0	0	0.963935	0.963935	0.00318181	0.00318181	ENSG00000246089	13016	18_Quiescent/low_signal	1	0	0	0	0	0	0	0	Foxd1_1|0|-11.551345594527|13|-|7.39675242949502|-4.15459316503198
rs10186267	2:80253441-80254014	2	80253630	C	T	0.052632	0.058642	1	1	9.96309	0.273977	1.7e-05	0.45716	25.4489	3.75145	4	2	0.753497	0	0.965363	0.978266	0.0015971	0.0031942	ENSG00000224731	4236	6_Weak_transcription	0	0	0	0	0	0	0	0	NA
rs4072810	7:751722-752170	7	752039	G	C	0.315789	4.04734	0.937631	0.937631	10.71	0.671122	0.000182	0.458266	16.8347	3.09212	3	3	-3.3e-05	0	0.907563	0.794694	0.0010656	0.00319681	ENSG00000164818	-14617	1_Active_TSS	1	0	0	0	0	1	0	0	UF1H3BETA|0|11.966137437288|4|-|-11.75462441392|0.211513023367985
rs57113243	4:184797201-184798050	4	184797523	G	A	0.105263	0.262976	0.995036	0.995036	11.2423	0.399627	0.002215	0.533763	28.0714	5.34929	4	4	2.4099	0	0.968641	0.74177	0.000799535	0.00319814	ENSG00000173320	-29309	2_Weak_TSS	0	0	1	0	1	1	1	0	Ik-1_2|0|-11.82868937796|6|+|12.234073864776|0.40538448681599
rs57888477	7:54348490-54349032	7	54348521	AT	A	0.342105	0.626168	0.998716	0.998716	9.95765	0.313346	0.01	0.5	13.226	3.21178	0	2	0	0	1	0.991832	0.00160182	0.00320365	ENSG00000231427	-49901	18_Quiescent/low_signal	0	0	0	0	0	0	0	0	HNF1_1|0|-22.092420134395|6|-|15.346002206741|-6.74641792765399
rs7516571	1:40733251-40733856	1	40733658	A	G	0.236842	0.006973	0.998404	0.998404	8.6874	0.663578	0.000162	0.465464	12.8408	4.08209	1	1	0	0	0.980288	0.980288	0.00320418	0.00320418	ENSG00000231296	-4595	10_Active_enhancer_2	1	0	0	0	0	0	0	0	NA
rs3040064	7:50758234-50758598	7	50758386	AAT	A	0.684211	1.37722	0.99927	0.99927	9.95394	0.646334	9.2e-05	0.487449	17.466	3.87241	1	2	0.938436	0	0.993245	0.9929	0.00160505	0.00321011	ENSG00000246387	79533	11_Weak_enhancer	1	0	0	0	1	1	0	0	SZF1-1|0|10.762747892296|7|+|-25.520655482268|-14.757907589972
rs7561553	2:226672205-226672746	2	226672422	A	G	0.263158	0.655306	0.999052	0.999052	10.7007	0.641972	6.7e-05	0.566586	15.0366	3.6897	3	3	0.093464	0	0.966173	0.994307	0.00107093	0.0032128	ENSG00000228206	109234	18_Quiescent/low_signal	1	0	1	0	1	0	0	0	Bach1|0|10.55188122911|8|-|0.0715396644400101|10.62342089355
rs10758260	9:34417761-34418019	9	34417916	A	G	0.763158	0.006973	0.999855	0.999855	9.95057	0.667889	0.011357	0.601816	11.1636	3.18081	2	2	1.04977	0	0.994614	0.989176	0.00160799	0.00321598	ENSG00000164972	-19912	6_Weak_transcription	0	1	0	0	0	1	1	0	MIF-1|0|11.966186889734|3|+|-10.744521005124|1.22166588460999
rs35414747	5:155841434-155841874	5	155841653	G	A	0.736842	3.97061	0.99148	0.99148	8.67989	0.354414	8.9e-05	0.445551	12.1272	3.89874	1	1	0	0	0.990748	0.990748	0.0032174	0.0032174	ENSG00000170624	87666	18_Quiescent/low_signal	1	0	0	0	0	0	1	0	NA
rs237055	17:74732378-74734326	17	74734002	C	T	0.921053	0.139592	0.998197	0.998197	11.6278	0.581468	0.000608	0.50495	37.2931	6.44799	10	5	1.29717	0	0.997158	0.98274	0.000649718	0.00324859	ENSG00000161547	1035	1_Active_TSS	0	0	0	1	1	1	1	0	Nrf-2_3|0|11.96616132912|4|-|-0.810770141500001|11.15539118762
rs11743648	5:96054276-96054747	5	96054395	A	C	0.184211	0.294145	0.993492	0.993492	8.65916	0.351071	5e-05	0.400796	21.7927	4.01978	1	1	0.006967	0	0.987446	0.987446	0.00325421	0.00325421	ENSG00000153113	56498	10_Active_enhancer_2	0	0	0	0	0	1	0	0	Irf_disc3|0|-11.925027017022|4|-|8.61865909774801|-3.306367919274
rs16876028	5:5703299-5703796	5	5703521	T	C	0.078947	0.139592	1	1	8.65752	0.309383	5.1e-05	0.320792	24.5212	4.09271	1	1	1.55521	0	0.981883	0.981883	0.00325714	0.00325714	ENSG00000164151	280491	10_Active_enhancer_2	1	1	0	0	0	0	0	0	NA
rs7143715	14:91752906-91753254	14	91753033	G	T	0.421053	1.65857	1	1	9.92375	0.397631	4.5e-05	0.490173	19.7863	3.64378	2	2	4.92281	0	0.993637	0.992886	0.0016316	0.00326319	ENSG00000119714	-32682	6_Weak_transcription	0	0	0	1	0	0	1	0	NA
rs12815506	12:117397847-117398236	12	117398143	G	A	0.131579	0.43618	0.973431	0.973431	8.64371	0.320965	0.003757	0.40966	17.7799	3.67609	2	1	0.55323	0	0.953781	0.950422	0.00328192	0.00328192	ENSG00000174989	49085	10_Active_enhancer_2	1	1	0	0	1	1	1	1	NF-E2_disc4|0|-11.33988747892|9|-|12.354003186976|1.01411570805601
rs11000202	10:73933510-73933995	10	73933699	A	G	0.447368	4.15767	1	1	8.64128	0.397371	0.00012	0.367989	26.7643	3.50455	1	1	0	0	0.996571	0.996571	0.00328631	0.00328631	ENSG00000200294	-7107	6_Weak_transcription	1	1	0	0	0	0	1	0	GCNF|0|-11.966064149602|8|-|7.57648442496598|-4.38957972463601
rs36174388	7:48222606-48223367	7	48222948	C	T	0.210526	0.0475	0.96962	0.96962	11.1889	0.618249	1.7e-05	0.543728	29.7191	4.33118	6	4	2.59275	0	0.983656	0.961417	0.000822878	0.00329151	ENSG00000179869	11550	17_Weak_repressed_polycomb	1	1	0	0	0	0	0	0	Foxa_known4|0|11.07392584536|8|+|0.804782620971991|11.878708466332
rs9452650	6:95058988-95059364	6	95059126	G	A	0.210526	1.35111	1	1	11.1857	0.614023	0.002862	0.455872	23.5274	4.73117	4	4	0	0	0.995423	0.991837	0.000824286	0.00329715	ENSG00000220370	4532	18_Quiescent/low_signal	1	0	0	0	0	0	1	0	Tgif1_1|0|11.966121158799|6|-|0.93464570437601|12.900766863175
rs61982219	14:26301708-26302127	14	26301809	T	C	0.184211	0.968783	1	1	11.1817	0.635716	0.004392	0.391263	11.9839	3.64379	4	4	6.20092	0	0.989123	0.990163	0.000826088	0.00330435	ENSG00000212270	-25790	17_Weak_repressed_polycomb	0	1	0	0	0	0	0	0	NA
rs2636937	3:197355729-197356092	3	197355908	A	T	0.342105	0.051986	0.800498	0.800498	8.62806	0.356437	8.4e-05	0.376386	23.5706	3.84389	3	1	0	0	0.75846	0.555074	0.00331024	0.00331024	ENSG00000214135	-952	10_Active_enhancer_2	0	1	0	0	1	1	1	1	EBF_disc1|0|-11.78988016329|10|+|11.25124835137|-0.538631811920013
rs1146957	13:81880097-81880406	13	81880226	A	T	0.131579	0.43618	0.997473	0.997473	9.89652	0.766811	0.000108	0.641575	5.88492	3.32647	2	2	0	0	0.985097	0.987076	0.00165592	0.00331183	ENSG00000229309	22788	18_Quiescent/low_signal	1	0	0	0	0	0	0	0	Brachyury_1|0|11.892180783872|9|-|-9.36442025785601|2.52776052601598
rs1449444	3:145790526-145791048	3	145790803	G	T	0.342105	0.051986	1	1	9.89566	0.343536	0.007141	0.3402	11.4112	3.54547	2	2	0.057866	0	0.993948	0.993134	0.00165669	0.00331338	ENSG00000240032	-3554	10_Active_enhancer_2	0	0	0	0	0	0	0	0	TCF12_disc2|0|-11.966130726342|4|+|12.487098141973|0.520967415630992
rs7124060	11:121435581-121435980	11	121435966	G	T	0.105263	0.262976	1	1	9.8911	0.673888	0.009904	0.538472	17.6962	3.72181	2	2	0.640723	0	0.983523	0.971712	0.0016608	0.0033216	ENSG00000246790	-111859	10_Active_enhancer_2	1	1	1	0	0	1	1	0	STAT_disc4|0|9.90839723848799|4|-|2.43903894086399|12.347436179352
rs2081607	8:53886366-53886707	8	53886458	G	A	0.236842	6.02708	1	1	8.62092	0.381345	9.9e-05	0.419497	27.5522	3.31363	1	1	-9e-06	0	0.996207	0.996207	0.00332324	0.00332324	ENSG00000183729	35372	17_Weak_repressed_polycomb	0	0	0	0	0	0	0	0	Gmeb1|0|-7.499130102234|9|+|11.528252036891|4.029121934657
rs9536269	13:53318830-53319451	13	53318904	T	C	0.315789	0.902531	0.999272	0.999272	10.636	0.611024	6e-05	0.461228	28.0985	4.75031	3	3	2.11048	0	0.973474	0.991972	0.0011091	0.00332731	ENSG00000136110	-4883	6_Weak_transcription	1	1	0	0	0	1	1	0	LBP-9|0|2.71831816408999|3|-|8.795619218576|11.513937382666
rs79873721	18:70438477-70438718	18	70438521	C	T	0.184211	0.968783	1	1	9.88578	0.681994	0.000123	0.566572	14.6426	3.32166	2	2	0.907553	0	0.987201	0.983799	0.00166561	0.00333122	ENSG00000166342	96707	17_Weak_repressed_polycomb	0	0	0	0	0	0	0	0	TCF12_disc2|0|10.716388516275|3|+|1.22723752807499|11.94362604435
rs730360	7:30509729-30510989	7	30510071	G	C	0.184211	0.968783	1	1	11.1546	0.395898	1.8e-05	0.527083	19.1403	5.48186	4	4	0.834211	0	0.990969	0.991437	0.000838216	0.00335286	ENSG00000106100	8671	10_Active_enhancer_2	1	0	0	0	1	1	1	0	Mtf1_2|0|-8.748546214692|11|-|11.775478199268|3.026931984576
rs4119545	9:33523366-33524286	9	33523482	C	G	0.473684	0.058642	0.998841	0.998841	11.5679	0.641995	0.045737	0.396291	9.34042	4.65221	5	5	5.60944	0	0.963837	0.990807	0.000671007	0.00335503	ENSG00000230453	-1027	17_Weak_repressed_polycomb	0	0	0	1	1	0	0	0	CTCF_disc2|0|11.42583262994|11|+|-2.94109835053401|8.48473427940598
rs6499329	16:70673070-70673613	16	70673577	T	G	0.526316	0.459753	0.994067	0.994067	11.5592	0.335223	4.2e-05	0.330086	8.90513	3.66824	4	5	0.015417	0	0.986903	0.989103	0.000674156	0.00337078	ENSG00000157368	-7399	9_Active_enhancer_1	1	0	0	1	1	0	0	0	NA
rs9373454	6:145690651-145690885	6	145690710	A	G	0.473684	2.55444	0.999367	0.999367	8.59481	0.629261	0.015938	0.493423	17.4917	3.13299	1	1	0	0	0.996391	0.996391	0.00337123	0.00337123	ENSG00000221796	20756	18_Quiescent/low_signal	0	1	0	0	0	0	1	0	Smad_2|0|11.966157425265|9|-|-0.187708796035999|11.778448629229
rs256266	5:132918833-132919018	5	132918994	G	A	0.289474	0.206997	0.885459	0.885459	8.59284	0.72778	0.06666	0.537175	6.06717	1.96724	1	1	0	0	0.817959	0.817959	0.00337488	0.00337488	ENSG00000053108	29390	18_Quiescent/low_signal	0	0	0	0	0	0	0	0	TAL1_disc2|0|11.966169775924|5|+|-0.785552080521995|11.180617695402
rs2365632	1:216079374-216079544	1	216079479	A	G	0.526316	0.459753	0.985341	0.985341	8.59185	0.662886	0.000232	0.490199	13.2537	2.64743	1	1	0	0	0.976652	0.976652	0.00337672	0.00337672	ENSG00000229242	19449	18_Quiescent/low_signal	0	1	0	0	0	0	0	0	Pou6f1_2|0|0.746762734146003|15|+|9.49052183958|10.237284573726
rs11574157	8:30890661-30891805	8	30891288	G	C	0.105263	0.262976	0.745848	0.745848	10.6021	0.577482	3e-06	0.551055	48.0217	6.38879	5	3	12.165	0	0.700405	0.295005	0.00112958	0.00338875	ENSG00000165392	-118	2_Weak_TSS	1	1	0	0	1	1	0	0	SMC3_disc3|0|0.299935762028014|1|+|11.200664756946|11.500600518974
rs10816213	9:9858216-9858846	9	9858373	T	A	0.210526	2.55444	0.999525	0.999525	11.1314	0.630409	0.001768	0.572238	16.4391	4.51063	5	4	0	0	0.991948	0.995579	0.000848769	0.00339508	ENSG00000230920	58792	18_Quiescent/low_signal	1	1	0	0	0	0	0	0	BAF155_disc2|0|11.96610974481|4|+|-0.603647563839999|11.36246218097
rs148287553	2:208908458-208908975	2	208908601	CTTAT	C	0.473684	0.058642	0.880171	0.880171	12.1614	0.3741	4.3e-05	0.476485	7.94175	3.40212	7	7	0.181275	0	0.991192	0.791703	0.000487885	0.00341519	ENSG00000241001	10523	18_Quiescent/low_signal	0	0	0	0	1	0	0	0	Foxa_known1|0|-22.647435086736|-1|+|13.135120865096|-9.51231422164
rs67910429	4:22799103-22799526	4	22799392	ACACAGCCAAG	A	0.578947	0.120222	0.935257	0.935257	10.5876	0.372837	0.000231	0.390022	20.8084	3.63996	2	3	0.770956	0	0.890892	0.878826	0.00113851	0.00341554	ENSG00000237350	-69530	18_Quiescent/low_signal	1	0	0	0	1	0	1	0	NA
rs9568139	13:49536567-49536728	13	49536705	A	G	0.289474	0.206997	1	1	8.56903	0.339168	0.008024	0.36805	15.4853	2.92032	2	1	0	0	0.860417	0.991592	0.00341929	0.00341929	ENSG00000102531	-13482	6_Weak_transcription	0	0	0	0	0	0	0	0	NA
rs2738630	16:78719059-78719258	16	78719077	G	C	0.447368	4.15767	0.994429	0.994429	11.1164	0.32541	3.1e-05	0.670281	10.6177	2.74825	4	4	0	0	0.9923	0.992557	0.000855681	0.00342273	ENSG00000243101	-140120	18_Quiescent/low_signal	0	0	0	0	0	0	0	1	GR_disc6|0|-1.405709851008|14|+|12.281689988408|10.8759801374
rs2495881	6:48749955-48750435	6	48750072	T	C	0.421053	4.96836	0.999784	0.999784	9.83549	0.294569	0.010155	0.345958	14.6077	3.95811	3	2	3.22842	0	0.975619	0.934145	0.00171177	0.00342353	ENSG00000221175	-67606	18_Quiescent/low_signal	0	0	0	0	0	0	0	0	NA
rs7853429	9:130955052-130955601	9	130955306	C	T	0.526316	0.459753	1	1	10.5812	0.585384	0.00174	0.510259	39.5287	5.35555	4	3	0	0	0.996688	0.99653	0.00114243	0.00342728	ENSG00000106976	-10607	1_Active_TSS	1	0	0	1	1	1	1	0	NA
rs12429448	13:28527226-28528912	13	28528547	C	A	0.315789	1.37722	0.999392	0.999392	11.518	0.404263	9e-06	0.496327	27.7314	5.58061	7	5	4.46626	0	0.99552	0.995719	0.000689249	0.00344625	ENSG00000238175	-438	1_Active_TSS	0	0	0	1	1	1	0	0	Egr-1_disc1|0|-11.966145826752|9|-|6.73514817324801|-5.23099765350401
rs11934199	4:190543533-190544266	4	190544009	T	C	0.394737	0.85067	0.916169	0.916169	8.55207	0.310278	0.003446	0.462065	14.6196	4.99338	4	1	5.12685	0	0.744188	0.565751	0.0034513	0.0034513	ENSG00000202215	87335	6_Weak_transcription	1	0	0	0	0	0	0	0	DMRT2|0|-11.96618198705|14|+|6.567592219734|-5.398589767316
rs2924492	11:59327520-59328778	11	59327886	G	A	0.052632	0.058642	0.986386	0.986386	12.6093	0.356055	0.000659	0.499379	33.3188	5.21513	8	9	11.0169	0	0.985387	0.966175	0.000383836	0.00345452	ENSG00000247575	4488	6_Weak_transcription	1	1	1	0	1	1	1	0	NA
rs117422163	7:43479390-43479805	7	43479695	G	A	0.105263	0.262976	0.992854	0.992854	12.1379	0.27488	6.9e-05	0.433855	8.65472	2.98557	5	7	2.18614	0	0.980435	0.96818	0.000494075	0.00345852	ENSG00000231638	82751	17_Weak_repressed_polycomb	0	0	0	1	0	0	0	0	NA
rs3133444	11:93063145-93064192	11	93063663	G	C	0.815789	0.294145	1	1	11.8454	0.595398	0.000534	0.463852	46.4469	5.63677	5	6	0	0	0.997237	0.994098	0.000578055	0.00346833	ENSG00000165325	-739	1_Active_TSS	0	0	0	0	1	1	0	1	Pax-5_known3|0|11.48092508836|22|+|-3.004483084908|8.47644200345201
rs35790435	8:66502481-66502638	8	66502523	G	A	0.368421	0.325822	1	1	8.54053	0.34321	0.000213	0.388187	13.1615	2.81662	1	1	0	0	0.994191	0.994191	0.00347324	0.00347324	ENSG00000200714	-2486	6_Weak_transcription	0	0	0	0	0	0	0	0	NA
rs7995032	13:101910379-101910881	13	101910617	G	A	0.263158	0.655306	1	1	8.53976	0.369622	7.3e-05	0.400423	16.4823	4.02885	1	1	0	0	0.995505	0.995505	0.00347471	0.00347471	ENSG00000102452	158464	6_Weak_transcription	0	0	1	0	0	0	0	0	AP-1_disc8|0|-11.966063228985|3|+|6.422465710108|-5.54359751887701
rs11255659	10:8408147-8408959	10	8408629	C	A	0.131579	0.43618	1	1	11.0749	0.619279	0.001257	0.517628	30.2278	5.3093	4	4	0.025945	0	0.943633	0.989754	0.000875047	0.00350019	ENSG00000226990	-34677	10_Active_enhancer_2	1	1	1	0	1	1	0	0	Foxo_4|0|11.966199421736|3|-|-0.191797087799998|11.774402333936
rs3820330	1:20142410-20142772	1	20142413	C	A	0.236842	1.40601	0.990837	0.990837	11.488	0.366684	0.002645	0.553497	11.48	3.62311	5	5	0	0	0.989846	0.981593	0.000700478	0.00350239	ENSG00000178828	-639	9_Active_enhancer_1	0	1	1	0	1	1	0	0	Msx-1_1|0|-1.805668719516|3|-|9.40843837946599|7.60276965995
rs6691101	1:166457431-166457839	1	166457774	C	T	0.605263	3.54395	0.99978	0.99978	8.52491	0.333427	0.000385	0.459941	14.2371	3.63593	1	1	0	0	0.989654	0.989654	0.00350318	0.00350318	ENSG00000234142	1845	18_Quiescent/low_signal	0	0	0	0	0	0	0	1	NA
rs9287712	2:9815475-9816117	2	9815939	A	G	0.631579	0.172336	1	1	12.3497	0.617999	0.003074	0.495515	28.4462	4.75493	8	8	0	0	0.990587	0.992922	0.000441059	0.00352847	ENSG00000244260	1322	10_Active_enhancer_2	1	1	0	0	1	1	1	1	NRSF_disc5|0|8.57025780007599|1|-|2.950310138112|11.520567938188
rs10108011	8:22320576-22321117	8	22320806	G	A	0.657895	0.626168	1	1	8.51168	0.641752	0.000175	0.583648	15.6979	3.07083	1	1	0	0	0.9954	0.9954	0.00352874	0.00352874	ENSG00000120910	21979	6_Weak_transcription	1	1	0	0	0	0	1	0	BAF155_disc1|0|11.96611411737|4|+|0.11795530504601|12.084069422416
rs16986195	2:19464725-19465112	2	19464845	T	C	0.105263	0.262976	1	1	10.5269	0.791793	0.000175	0.629354	7.3195	3.03343	2	3	0	0	0.977274	0.984257	0.00117651	0.00352952	ENSG00000236204	81784	18_Quiescent/low_signal	0	0	0	0	0	0	0	0	TLX1::NFIC|0|11.966079960522|5|+|-3.00729728032799|8.95878268019401
rs9869202	3:192624800-192625196	3	192625190	C	T	0.394737	0.996253	0.985315	0.985315	9.77867	0.608717	3.6e-05	0.476806	27.1173	4.12679	2	2	0	0	0.981211	0.984167	0.00176548	0.00353096	ENSG00000180611	11150	18_Quiescent/low_signal	1	1	0	0	0	0	1	0	NA
rs9820539	3:157291750-157292906	3	157292022	G	A	0.684211	0.012492	1	1	9.77751	0.390873	3.9e-05	0.48509	27.3791	5.01946	2	2	0	0	0.996718	0.99549	0.0017666	0.0035332	ENSG00000174899	30714	18_Quiescent/low_signal	1	0	0	0	1	0	1	0	GR_disc6|0|-10.861967982592|1|-|10.600303279316|-0.261664703275997
rs115918703	6:51928426-51928931	6	51928492	A	C	0.052632	0.058642	0.959192	0.959192	8.49673	0.299517	2e-05	0.397473	19.825	3.9246	3	1	1.13268	0	0.946999	0.944207	0.00355785	0.00355785	ENSG00000238539	2012	17_Weak_repressed_polycomb	0	0	0	1	1	0	0	0	RXRA_disc2|0|-11.18513038886|16|-|8.906045968052|-2.279084420808
rs7684744	4:110310406-110311241	4	110311126	T	C	0.236842	6.02708	0.995071	0.995071	8.49152	0.600924	0.009491	0.59781	26.6762	4.2634	1	1	0.038933	0	0.993376	0.993376	0.00356806	0.00356806	ENSG00000138802	-44466	17_Weak_repressed_polycomb	0	0	0	0	0	0	0	0	CHOP::CEBPalpha|0|1.98951835390199|1|+|10.274544560778|12.26406291468
rs35614430	4:6751176-6751420	4	6751265	G	C	0.368421	0.325822	0.994482	0.994482	10.5031	0.368897	4.6e-05	0.55054	11.1558	3.41723	3	3	2.33863	0	0.991985	0.988478	0.00119177	0.0035753	ENSG00000170871	-33284	10_Active_enhancer_2	0	0	0	0	0	0	0	0	ATF3_known5|0|-11.966187970665|8|+|14.195682456025|2.22949448535999
rs466240	7:23338602-23339448	7	23338774	C	T	0.421053	0.120222	0.998493	0.998493	8.48368	0.569835	5e-06	0.555079	44.3833	6.10515	4	1	2.99033	0	0.985737	0.994491	0.00358347	0.00358347	ENSG00000156928	243	1_Active_TSS	0	0	0	0	1	1	0	0	NA
rs2877239	5:32028121-32028424	5	32028273	C	T	0.421053	0.120222	0.999677	0.999677	9.7488	0.37898	9.3e-05	0.444805	20.659	3.08585	2	2	5.58355	0	0.989798	0.989378	0.0017944	0.00358879	ENSG00000245690	-96698	6_Weak_transcription	0	0	0	0	0	0	0	0	Whn|0|-11.966175075652|6|+|12.137480032187|0.171304956534996
rs6902661	6:20605834-20606301	6	20605982	A	G	0.763158	1.40601	1	1	9.74736	0.365075	7e-05	0.415605	20.6721	4.10525	1	2	0	0	0.995619	0.995619	0.0017958	0.00359161	ENSG00000145996	71145	10_Active_enhancer_2	0	0	0	0	1	0	1	1	NA
rs7010314	8:54531154-54532094	8	54531848	T	A	0.894737	0.262976	0.999721	0.999721	8.47948	0.65911	6.1e-05	0.576338	31.6908	4.25488	1	1	0	0	0.987296	0.987296	0.00359174	0.00359174	ENSG00000206144	78487	6_Weak_transcription	0	0	0	0	1	1	0	0	BAF155_disc1|0|11.96611411737|4|+|-0.0834129166100013|11.88270120076
rs10013316	4:29736036-29736151	4	29736047	A	T	0.421053	0.353306	0.994624	0.994624	8.47393	0.331408	0.000231	0.460308	8.88561	2.42874	1	1	0	0	0.989758	0.989758	0.00360273	0.00360273	ENSG00000212045	-15783	18_Quiescent/low_signal	0	0	0	0	0	0	0	0	Lhx3_2|0|-11.966046850514|9|+|12.181964348274|0.215917497759989
[truncated: 1,562 more rows]
