# Supplementary material for: Type 2 Diabetes–Associated Genetic Variants Regulate Chromatin Accessibility in Human Islets
Source: Oxford University Press journal article supplement (doi:10.2337/db18-0393), 2018-09-04
Supplement: db180393supplementarytable10.xlsx [file db180393supplementarytable10.xlsx]

## Sheet: Table_S8
Table S9: Differentially accessible ATAC-seq peaks in T2D islets
seqnames	start	end	logFC	logCPM	LR	PValue	AdjustedPValue	NearestExpressedGene	NumPeaksCalled_ND_islets	NumPeaksCalled_T2D_islets	Islet2_Non.Diabetic	Islet4_Non.Diabetic	Islet5_Non.Diabetic	Islet17_Non.Diabetic	Islet20_New_Non.Diabetic	Islet12_Diabetic	Islet21_Diabetic	Islet22_Diabetic	Islet23_Diabetic	Islet24_Diabetic	Islet2_Non.Diabetic.1	Islet4_Non.Diabetic.1	Islet5_Non.Diabetic.1	Islet17_Non.Diabetic.1	Islet20_New_Non.Diabetic.1	Islet12_Diabetic.1	Islet21_Diabetic.1	Islet22_Diabetic.1	Islet23_Diabetic.1	Islet24_Diabetic.1
chr8	7877539	7877857	-5.03939	1.51575	92.1179	8.17e-22	4.28e-17	ENSG00000173295	4	0	79	46	34	52	18	5	1	1	1	2	+	+	+	+	-	-	-	-	-	-
chr4	12381852	12382360	2.47923	3.34135	56.8524	4.7e-14	1.23e-09	ENSG00000157869	1	4	15	2	23	104	10	404	58	19	295	102	-	-	-	+	-	+	+	-	+	+
chr10	46762182	46762921	2.56607	2.3646	40.4045	2.06e-10	2.48e-06	ENSG00000204177	1	3	13	68	35	1	25	2	64	52	127	42	-	+	-	-	-	-	+	+	+	-
chr14	42359817	42360536	-1.24474	4.86761	40.1903	2.3e-10	2.48e-06	ENSG00000165379	5	5	214	338	255	414	493	239	161	256	107	176	+	+	+	+	+	+	+	+	+	+
chr7	124893430	124894143	-1.93649	3.20423	39.7834	2.84e-10	2.48e-06	ENSG00000128513	4	0	72	80	87	158	225	52	39	38	20	51	-	+	+	+	+	-	-	-	-	-
chr15	68131912	68133077	1.41332	5.97834	39.9598	2.59e-10	2.48e-06	ENSG00000033800	5	5	234	235	243	399	322	322	1712	1377	243	945	+	+	+	+	+	+	+	+	+	+
chr4	9692736	9693794	0.961955	6.52716	33.1977	8.32e-09	6.23e-05	ENSG00000109667	5	5	540	533	545	833	346	1805	898	1202	1131	1254	+	+	+	+	+	+	+	+	+	+
chr18	40219979	40220594	-1.15443	4.68493	31.7468	1.76e-08	0.000115012	ENSG00000132872	5	5	200	311	287	475	273	232	143	166	138	143	+	+	+	+	+	+	+	+	+	+
chr18	9952654	9953240	-1.66986	3.35934	30.5998	3.17e-08	0.000184596	ENSG00000101558	4	3	47	122	83	223	161	153	35	45	55	41	-	+	+	+	+	+	-	+	+	-
chr22	20657418	20657970	-1.45364	3.87525	30.3768	3.56e-08	0.000186368	ENSG00000161133	5	3	345	60	274	241	44	144	25	22	59	118	+	+	+	+	+	+	-	-	+	+
chr1	233689875	233690157	-1.88435	2.29054	29.5755	5.38e-08	0.000256122	ENSG00000135750	4	0	54	61	79	63	61	32	10	15	22	25	-	+	+	+	+	-	-	-	-	-
chr10	47653991	47654479	1.08406	4.32929	28.6272	8.77e-08	0.000362005	ENSG00000204172	5	5	131	72	109	190	98	294	231	214	280	317	+	+	+	+	+	+	+	+	+	+
chr7	12105653	12106656	-0.863083	5.56034	28.5816	8.98e-08	0.000362005	ENSG00000106460	5	5	533	561	500	563	527	233	385	346	215	322	+	+	+	+	+	+	+	+	+	+
chr2	225897381	225897824	-1.75716	2.3973	27.923	1.26e-07	0.000472379	ENSG00000135905	4	0	61	38	52	92	92	48	18	23	17	33	+	-	+	+	+	-	-	-	-	-
chr13	34933293	34933731	-1.45028	3.15117	27.0349	2e-07	0.000697846	ENSG00000133119	5	4	128	52	72	208	103	79	29	57	47	58	+	+	+	+	+	+	-	+	+	+
chr1	163625681	163626354	1.3042	3.43075	26.0221	3.38e-07	0.00110517	ENSG00000232995	0	5	62	42	46	63	60	154	122	133	128	223	-	-	-	-	-	+	+	+	+	+
chr6	170707838	170708843	-2.50968	2.64686	25.7458	3.89e-07	0.00120022	ENSG00000112584	3	0	130	36	172	45	58	31	8	2	13	25	+	-	+	+	-	-	-	-	-	-
chr10	51544365	51544793	2.55649	2.72253	25.469	4.5e-07	0.00130839	ENSG00000204152	0	5	15	34	30	8	7	219	68	55	107	100	-	-	-	-	-	+	+	+	+	+
chr12	26306254	26306884	-1.06373	4.14094	25.3117	4.88e-07	0.00134479	ENSG00000123095	5	5	164	165	261	354	158	95	140	90	66	116	+	+	+	+	+	+	+	+	+	+
chr1	160519027	160519518	1.30734	3.51006	25.2033	5.16e-07	0.00135141	ENSG00000162738	2	5	60	28	36	76	66	262	132	142	122	204	-	-	-	+	+	+	+	+	+	+
chr7	20837350	20838604	0.891492	5.19661	25.007	5.71e-07	0.00142496	ENSG00000105855	5	5	236	174	278	563	95	446	572	371	227	661	+	+	+	+	+	+	+	+	+	+
chr7	15237517	15238530	-0.969568	4.50815	24.4275	7.72e-07	0.00183739	ENSG00000136267	5	5	232	207	228	398	243	227	148	173	107	155	+	+	+	+	+	+	+	+	+	+
chr18	7950733	7951001	-1.21815	3.44077	24.1934	8.71e-07	0.0019846	ENSG00000173482	3	2	118	169	107	131	124	56	86	68	31	62	-	+	+	-	+	-	+	+	-	-
chr4	166501505	166502103	-0.955547	4.70372	23.968	9.8e-07	0.00213807	ENSG00000109472	5	5	240	412	302	321	229	129	194	231	100	144	+	+	+	+	+	+	+	+	+	+
chr5	163085754	163086867	0.856535	5.69631	23.6397	1.16e-06	0.00243424	ENSG00000038274	5	5	205	125	148	682	397	1393	494	439	668	787	+	+	+	+	+	+	+	+	+	+
chr1	234040255	234041274	0.97628	4.86826	23.5064	1.24e-06	0.0025085	ENSG00000183780	4	5	189	172	176	376	87	224	534	395	214	434	+	+	+	+	-	+	+	+	+	+
chr1	159750343	159751259	0.759506	6.74163	23.3173	1.37e-06	0.00266512	ENSG00000158716	5	5	753	810	805	1032	414	1228	1218	1333	983	1660	+	+	+	+	+	+	+	+	+	+
chr22	18717686	18718262	-0.968837	5.27648	23.0227	1.6e-06	0.00289211	ENSG00000184979	5	5	936	127	511	719	64	608	65	75	192	421	+	+	+	+	+	+	+	+	+	+
chr5	65891862	65892868	0.75972	5.77431	23.0834	1.55e-06	0.00289211	ENSG00000069020	5	5	340	280	326	676	247	930	592	647	575	793	+	+	+	+	+	+	+	+	+	+
chr14	94254639	94255572	1.20293	3.44138	22.7532	1.84e-06	0.00289502	ENSG00000089723	1	5	69	38	49	131	36	153	182	117	99	180	-	-	-	+	-	+	+	+	+	+
chr13	107187492	107189033	0.709414	7.02476	22.6539	1.94e-06	0.00289502	ENSG00000125266	5	5	855	696	744	1588	680	1841	1490	1602	1309	1964	+	+	+	+	+	+	+	+	+	+
chr4	146631123	146631316	-1.92015	1.93082	22.7458	1.85e-06	0.00289502	ENSG00000151611	3	0	29	41	38	73	57	26	20	31	1	25	-	+	-	+	+	-	-	-	-	-
chr6	126070161	126071164	0.720389	6.40616	22.7392	1.86e-06	0.00289502	ENSG00000111912	5	5	545	492	659	844	496	822	1249	1123	642	1197	+	+	+	+	+	+	+	+	+	+
chr6	139292013	139292571	-1.25753	3.3035	22.709	1.88e-06	0.00289502	ENSG00000135597	4	2	124	112	74	169	121	59	60	53	37	87	+	+	-	+	+	-	+	-	-	+
chr5	152930630	152931600	1.35678	2.91991	22.6052	1.99e-06	0.00289502	ENSG00000037749	0	3	21	32	38	53	42	120	83	56	134	133	-	-	-	-	-	+	-	-	+	+
chr7	72649194	72650068	0.894097	5.01984	22.8646	1.74e-06	0.00289502	ENSG00000130305	5	5	243	202	286	288	129	253	370	429	351	481	+	+	+	+	+	+	+	+	+	+
chr3	58594435	58594700	1.27262	3.50574	22.42	2.19e-06	0.00310193	ENSG00000168309	2	5	58	34	39	81	57	109	250	265	52	142	+	-	-	+	-	+	+	+	+	+
chr4	31147828	31148600	-1.06081	4.17987	22.3569	2.26e-06	0.00312121	ENSG00000169851	5	5	141	159	200	302	257	156	85	107	107	151	+	+	+	+	+	+	+	+	+	+
chr11	41425755	41426418	-1.12329	3.82072	22.0426	2.67e-06	0.00358201	ENSG00000166181	5	5	131	97	125	258	226	130	96	103	69	70	+	+	+	+	+	+	+	+	+	+
chr1	16892426	16893836	-1.5754	4.25881	21.8562	2.94e-06	0.00367872	ENSG00000219481	5	4	229	154	352	204	275	103	84	112	40	112	+	+	+	+	+	+	-	+	+	+
chr4	97698074	97698979	-1.13947	4.53849	21.8492	2.95e-06	0.00367872	ENSG00000182168	5	5	213	175	263	399	330	205	111	107	103	250	+	+	+	+	+	+	+	+	+	+
chr3	189838084	189839012	0.839175	5.37301	21.9385	2.82e-06	0.00367872	ENSG00000090530	5	5	223	191	154	560	192	777	425	550	510	569	+	+	+	+	+	+	+	+	+	+
chr10	43571921	43572989	1.13565	4.15789	21.3841	3.76e-06	0.00447512	ENSG00000165731	1	5	109	73	60	211	72	231	276	257	229	205	-	-	-	+	-	+	+	+	+	+
chr9	44992890	44993507	-0.979236	4.65823	21.4203	3.69e-06	0.00447512	ENSG00000154529	5	5	392	260	368	288	155	227	122	172	79	210	+	+	+	+	+	+	+	+	+	+
chr6	47999834	48000357	-1.22313	3.38062	21.2625	4e-06	0.0045609	ENSG00000244694	5	4	124	99	106	174	91	128	34	62	38	120	+	+	+	+	+	+	-	+	+	+
chr5	100094130	100095764	-1.49051	5.14368	21.2669	4e-06	0.0045609	ENSG00000113532	5	4	263	251	392	664	667	227	130	323	110	239	+	+	+	+	+	+	+	+	-	+
chr4	36773058	36773709	-1.30324	3.55331	21.212	4.11e-06	0.00458318	ENSG00000047365	3	5	74	64	76	376	189	83	62	74	37	113	-	-	+	+	+	+	+	+	+	+
chr13	82312426	82312947	-1.17119	3.40946	21.0775	4.41e-06	0.00481389	ENSG00000136158	5	4	121	129	163	111	122	44	58	67	44	58	+	+	+	+	+	+	+	+	+	-
chr2	85197483	85199372	0.755804	6.24094	20.9493	4.72e-06	0.00504201	ENSG00000176407	5	5	545	369	369	1070	321	936	1081	1075	546	1179	+	+	+	+	+	+	+	+	+	+
chr7	56183521	56184432	0.839342	5.09175	20.9034	4.83e-06	0.00506088	ENSG00000185290	5	5	184	128	137	348	211	666	285	523	343	607	+	+	+	+	+	+	+	+	+	+
chr10	47655642	47656352	0.782003	5.08137	20.7017	5.37e-06	0.00551292	ENSG00000204172	5	5	234	191	231	364	158	436	408	395	361	470	+	+	+	+	+	+	+	+	+	+
chr4	53524995	53526390	0.705685	5.93059	20.5778	5.73e-06	0.00565951	ENSG00000248866	5	5	410	310	401	841	233	1015	703	707	482	981	+	+	+	+	+	+	+	+	+	+
chr18	63835888	63836682	0.820365	5.24863	20.6009	5.66e-06	0.00565951	ENSG00000071991	5	5	101	122	100	416	307	1165	302	271	686	382	+	+	+	+	+	+	+	+	+	+
chr3	80488591	80489160	1.191	3.42675	20.3367	6.49e-06	0.00630015	ENSG00000169855	2	5	13	33	22	117	75	318	106	89	196	102	-	-	-	+	+	+	+	+	+	+
chr13	81529725	81530204	-1.06221	3.76319	20.2709	6.72e-06	0.00640215	ENSG00000136158	5	5	196	175	113	159	138	78	75	127	60	86	+	+	+	+	+	+	+	+	+	+
chr1	1623766	1624897	0.883353	5.2679	20.2208	6.9e-06	0.00645477	ENSG00000189339	5	5	297	284	454	228	119	407	304	450	330	742	+	+	+	+	+	+	+	+	+	+
chr4	15554327	15554851	-1.27282	2.73917	20.0858	7.4e-06	0.00680527	ENSG00000048342	3	1	81	65	73	121	69	35	54	46	15	42	+	+	-	+	-	-	+	-	-	-
chr2	144660504	144660873	-1.62065	2.34297	19.8667	8.3e-06	0.00749994	ENSG00000121964	3	1	33	59	54	74	89	43	14	31	15	40	-	+	-	+	+	-	-	-	-	+
chr18	22931797	22932498	0.939442	4.79343	19.7409	8.87e-06	0.00787421	ENSG00000141380	5	5	156	157	112	354	109	351	460	302	187	551	+	+	+	+	+	+	+	+	+	+
chr17	3796057	3796848	0.894924	4.94779	19.6022	9.54e-06	0.00832581	ENSG00000004660	4	5	243	196	221	314	94	282	390	549	248	407	+	+	+	+	-	+	+	+	+	+
chr10	43724596	43725662	0.904538	4.17968	19.5166	9.97e-06	0.00842651	ENSG00000198915	4	5	115	114	113	154	81	260	224	230	168	279	+	+	-	+	+	+	+	+	+	+
chr18	47182364	47182838	-1.27877	2.89655	19.5247	9.93e-06	0.00842651	ENSG00000101670	3	3	42	154	24	65	124	82	23	60	42	42	-	+	-	+	+	+	-	+	+	-
chr18	4454808	4455663	0.967501	4.27138	19.4201	1.05e-05	0.0087227	ENSG00000231824	5	5	132	72	112	217	97	242	371	182	169	253	+	+	+	+	+	+	+	+	+	+
chr7	138665807	138666909	0.7171	5.68335	19.3332	1.1e-05	0.00898608	ENSG00000122778	5	5	331	298	273	676	237	645	737	708	393	735	+	+	+	+	+	+	+	+	+	+
chr9	136932582	136933970	0.752827	5.4773	19.1974	1.18e-05	0.00935627	ENSG00000169925	5	5	295	260	327	576	179	316	752	626	264	677	+	+	+	+	+	+	+	+	+	+
chr7	123672122	123673767	0.752516	5.49689	19.2175	1.17e-05	0.00935627	ENSG00000106299	5	5	224	265	186	571	242	795	542	527	473	655	+	+	+	+	+	+	+	+	+	+
chr21	9937729	9938085	-1.52719	2.18859	19.1562	1.2e-05	0.00941742	ENSG00000188681	3	0	107	60	84	41	16	10	16	17	11	18	+	+	+	-	-	-	-	-	-	-
chr7	143058701	143060089	0.977543	3.97336	19.0864	1.25e-05	0.00962471	ENSG00000159840	1	5	124	79	72	148	66	204	210	198	147	264	-	-	-	+	-	+	+	+	+	+
chr18	1270149	1270557	-1.48277	2.28902	19.0526	1.27e-05	0.00965449	ENSG00000141433	3	2	40	37	57	111	61	45	33	34	9	21	-	-	+	+	+	+	+	-	-	-
chr10	30347757	30348839	1.14368	3.78433	18.8863	1.39e-05	0.00994575	ENSG00000165757	1	5	70	69	68	151	41	236	184	207	172	137	-	-	-	+	-	+	+	+	+	+
chr3	28616569	28618208	0.789722	5.1308	18.7621	1.48e-05	0.00994575	ENSG00000206559	5	5	240	243	184	375	146	479	456	389	320	563	+	+	+	+	+	+	+	+	+	+
chr5	116113753	116114119	-1.50063	2.19686	18.7753	1.47e-05	0.00994575	ENSG00000092421	3	0	80	45	20	96	48	29	23	23	20	30	+	+	-	+	-	-	-	-	-	-
chr4	74180826	74181200	-1.41967	2.48375	18.9306	1.36e-05	0.00994575	ENSG00000132466	5	1	85	73	69	61	48	34	9	38	33	36	+	+	+	+	+	-	-	-	+	-
chr11	8102164	8103446	0.919162	4.21534	18.84	1.42e-05	0.00994575	ENSG00000166402	2	5	122	67	105	216	85	263	214	258	151	350	+	-	-	+	-	+	+	+	+	+
chr7	20117916	20118445	-1.05821	3.82966	18.8315	1.43e-05	0.00994575	ENSG00000183742	5	5	112	140	151	277	163	95	75	127	58	122	+	+	+	+	+	+	+	+	+	+
chr5	10563549	10564573	0.90118	4.45732	18.8732	1.4e-05	0.00994575	ENSG00000112977	5	5	111	160	148	180	120	164	308	377	183	311	+	+	+	+	+	+	+	+	+	+
chr14	51296792	51298508	0.66237	5.9616	18.7833	1.46e-05	0.00994575	ENSG00000100503	5	5	417	317	382	809	284	999	673	834	493	994	+	+	+	+	+	+	+	+	+	+
chr8	35609400	35610153	-1.09735	3.68056	18.918	1.36e-05	0.00994575	ENSG00000156687	5	4	150	107	135	232	119	116	54	94	44	151	+	+	+	+	+	+	+	+	-	+
chr4	182756360	182757183	-1.01054	3.94399	18.7342	1.5e-05	0.00996425	ENSG00000218336	5	5	117	149	140	232	234	164	91	79	88	118	+	+	+	+	+	+	+	+	+	+
chr6	121543926	121544329	-1.18573	2.95263	18.652	1.57e-05	0.0102734	ENSG00000146350	4	4	56	92	71	119	110	69	32	50	50	49	-	+	+	+	+	+	-	+	+	+
chr8	48173105	48174114	0.745701	5.44482	18.596	1.62e-05	0.0103217	ENSG00000164808	5	5	268	238	262	617	159	616	466	617	363	726	+	+	+	+	+	+	+	+	+	+
chr3	58309234	58310011	-0.826599	5.36199	18.5973	1.61e-05	0.0103217	ENSG00000168297	5	5	313	395	292	609	611	384	197	293	289	441	+	+	+	+	+	+	+	+	+	+
chr8	1771420	1772462	0.853649	5.1117	18.5494	1.66e-05	0.0104496	ENSG00000104728	5	5	283	225	307	403	80	366	513	418	266	424	+	+	+	+	+	+	+	+	+	+
chr9	45352129	45352775	0.871503	4.63883	18.4906	1.71e-05	0.0106486	ENSG00000227449	3	5	128	84	89	187	196	590	191	298	310	413	+	-	-	+	+	+	+	+	+	+
chr18	31702643	31703157	-1.29333	2.59384	18.3896	1.8e-05	0.010967	ENSG00000101746	4	3	53	73	47	114	59	78	32	40	15	51	-	+	+	+	+	+	-	+	-	+
chr1	166808274	166809501	0.654782	6.23567	18.3939	1.8e-05	0.010967	ENSG00000143157	5	5	503	471	480	927	348	935	997	953	523	1231	+	+	+	+	+	+	+	+	+	+
chr18	48322951	48323851	-1.01107	4.04731	18.3316	1.86e-05	0.011049	ENSG00000082212	5	5	191	135	209	253	180	107	109	154	63	98	+	+	+	+	+	+	+	+	+	+
chr6	134994577	134995117	-0.988258	4.01919	18.3324	1.86e-05	0.011049	ENSG00000118515	5	5	179	106	156	286	207	151	86	109	83	149	+	+	+	+	+	+	+	+	+	+
chr3	1613146	1614031	2.91474	3.46373	18.3058	1.88e-05	0.0110739	ENSG00000144619	1	4	60	15	54	13	22	21	89	176	367	157	+	-	-	-	-	-	+	+	+	+
chr3	110036995	110037381	-1.41969	2.23727	18.2418	1.95e-05	0.0112037	ENSG00000177707	2	2	39	32	33	100	69	76	18	19	35	16	-	-	-	+	+	+	-	-	+	-
chr10	28965812	28967455	0.78745	5.72172	18.2413	1.95e-05	0.0112037	ENSG00000095739	5	5	258	305	298	748	213	781	542	634	640	790	+	+	+	+	+	+	+	+	+	+
chr21	29628570	29629215	-0.976898	4.06169	18.1935	2e-05	0.0113633	ENSG00000156239	5	5	169	88	210	383	168	171	100	93	105	87	+	+	+	+	+	+	+	+	+	+
chr4	42857735	42858178	-1.3094	2.30127	18.1396	2.05e-05	0.0114799	ENSG00000124406	3	0	58	59	54	65	63	27	23	20	27	33	-	+	-	+	+	-	-	-	-	-
chr1	162039214	162040044	0.744484	5.32549	18.1331	2.06e-05	0.0114799	ENSG00000162745	5	5	269	257	255	495	153	540	499	438	364	633	+	+	+	+	+	+	+	+	+	+
chr6	143154021	143154687	-1.03254	3.81318	18.0076	2.2e-05	0.0115477	ENSG00000010818	5	5	121	158	169	205	151	130	72	103	61	112	+	+	+	+	+	+	+	+	+	+
chr5	102817838	102818448	0.976897	3.91123	18.0577	2.14e-05	0.0115477	ENSG00000112874	3	5	45	34	31	188	128	364	152	115	272	160	-	+	-	+	+	+	+	+	+	+
chr12	95269028	95269693	-1.089	3.18713	17.9478	2.27e-05	0.0115477	ENSG00000184752	4	1	86	101	65	166	91	121	42	64	52	65	-	+	+	+	+	+	-	-	-	-
chr9	68438664	68438915	-1.9393	1.27239	18.0559	2.15e-05	0.0115477	ENSG00000170161	3	0	43	29	36	16	32	8	7	7	2	18	+	-	+	-	+	-	-	-	-	-
chr7	17344534	17345037	-1.07043	3.89008	17.9783	2.23e-05	0.0115477	ENSG00000106546	5	5	102	159	137	230	194	186	88	122	47	120	+	+	+	+	+	+	+	+	+	+
chr5	129239592	129241380	0.733185	5.95072	17.9923	2.22e-05	0.0115477	ENSG00000066583	5	5	394	374	388	902	219	829	869	729	529	834	+	+	+	+	+	+	+	+	+	+
chr7	70158523	70159877	0.768553	5.22787	17.9525	2.26e-05	0.0115477	ENSG00000158321	5	5	204	190	168	551	167	645	431	421	424	531	+	+	+	+	+	+	+	+	+	+
chr4	176213612	176213979	-1.27119	2.41674	18.015	2.19e-05	0.0115477	ENSG00000145451	4	0	71	68	54	59	68	26	24	31	27	34	+	+	+	+	-	-	-	-	-	-
chr3	22532675	22533305	-0.842063	4.45664	17.9516	2.27e-05	0.0115477	ENSG00000151789	5	5	234	208	219	287	257	186	107	160	151	188	+	+	+	+	+	+	+	+	+	+
chr5	157405002	157405531	1.06531	3.2773	17.9155	2.31e-05	0.0116327	ENSG00000113282	2	5	38	30	29	75	64	216	72	85	213	106	-	-	-	+	+	+	+	+	+	+
chr1	1004002	1004408	1.03285	3.57135	17.8881	2.34e-05	0.0116888	ENSG00000217801	0	4	69	68	69	102	55	120	166	200	127	140	-	-	-	-	-	+	-	+	+	+
chr2	79831771	79832300	-1.12983	3.21587	17.7968	2.46e-05	0.0121479	ENSG00000066032	5	4	84	94	65	128	139	113	35	53	53	91	+	+	+	+	+	+	-	+	+	+
chr7	12604850	12605256	-1.08294	3.77334	17.7496	2.52e-05	0.0123232	ENSG00000006747	5	4	105	119	110	161	265	137	67	124	63	90	+	+	+	+	+	+	+	+	+	-
chr6	127343332	127344642	0.774225	4.9969	17.734	2.54e-05	0.0123232	ENSG00000118518	5	5	163	122	129	447	143	781	256	275	478	440	+	+	+	+	+	+	+	+	+	+
chr12	92528474	92528887	-1.00437	3.61594	17.676	2.62e-05	0.0125879	ENSG00000257242	5	3	107	131	115	204	140	117	66	85	61	106	+	+	+	+	+	-	+	+	-	+
chr4	109532038	109532784	-0.94993	4.58463	17.5942	2.73e-05	0.0129045	ENSG00000109475	5	5	212	271	186	241	384	194	143	238	80	223	+	+	+	+	+	+	+	+	+	+
chr13	36466116	36466843	-0.956014	4.32508	17.6069	2.72e-05	0.0129045	ENSG00000133104	5	5	168	170	233	259	328	109	146	149	84	145	+	+	+	+	+	+	+	+	+	+
chr1	142808122	142809080	-1.08578	3.63554	17.5488	2.8e-05	0.0129343	ENSG00000196369	5	4	171	98	165	180	129	75	95	73	34	96	+	+	+	+	+	+	+	-	+	+
chr5	59122721	59123355	-1.0709	3.22465	17.5695	2.77e-05	0.0129343	ENSG00000152931	4	2	97	74	79	141	125	102	33	53	92	55	+	+	-	+	+	+	-	-	+	-
chr2	209419508	209420224	-1.32738	2.76787	17.5391	2.81e-05	0.0129343	ENSG00000144407	4	2	72	43	81	139	67	95	24	51	21	48	+	-	+	+	+	+	-	+	-	-
chr11	48001819	48003102	0.747079	5.15807	17.4978	2.88e-05	0.0131029	ENSG00000149177	5	5	278	222	191	403	148	410	499	450	242	628	+	+	+	+	+	+	+	+	+	+
chr5	59040357	59041532	-0.902419	4.29425	17.4237	2.99e-05	0.0135062	ENSG00000152931	5	5	206	158	214	343	190	201	100	174	111	134	+	+	+	+	+	+	+	+	+	+
chr1	110692999	110693936	0.773822	4.97697	17.369	3.08e-05	0.0135991	ENSG00000197106	4	5	209	237	121	304	142	396	380	510	226	549	+	+	-	+	+	+	+	+	+	+
chr7	7175830	7176632	-0.986634	3.78224	17.3788	3.06e-05	0.0135991	ENSG00000106392	4	5	100	122	67	298	159	214	55	91	128	93	+	+	-	+	+	+	+	+	+	+
chr7	56031933	56032996	0.683486	5.84918	17.3463	3.12e-05	0.0135991	ENSG00000239789	5	5	457	294	338	744	269	712	823	715	451	811	+	+	+	+	+	+	+	+	+	+
chr7	8429347	8430059	0.966621	4.16325	17.3566	3.1e-05	0.0135991	ENSG00000003147	3	5	108	80	32	124	106	357	112	298	239	320	-	+	-	+	+	+	+	+	+	+
chr2	80277228	80277862	0.837548	4.44777	17.2592	3.26e-05	0.0136317	ENSG00000066032	5	5	101	87	71	192	147	606	205	280	200	332	+	+	+	+	+	+	+	+	+	+
chr2	160353777	160354127	-1.23629	2.66166	17.2494	3.28e-05	0.0136317	ENSG00000123636	2	2	65	62	57	97	86	63	43	42	18	40	-	-	-	+	+	+	-	+	-	-
chr1	78805170	78806212	-1.05051	3.47991	17.2428	3.29e-05	0.0136317	ENSG00000122420	5	4	104	124	145	175	113	76	91	64	34	79	+	+	+	+	+	+	+	+	-	+
chr7	141947469	141947957	1.26814	2.7275	17.2562	3.27e-05	0.0136317	ENSG00000257743	1	5	23	21	22	64	34	156	112	55	53	108	-	-	-	+	-	+	+	+	+	+
chr6	69344395	69345417	0.734634	5.56085	17.2571	3.26e-05	0.0136317	ENSG00000168216	5	5	279	312	181	562	230	729	526	604	474	762	+	+	+	+	+	+	+	+	+	+
chr8	90914080	90915352	0.614167	6.88744	17.234	3.3e-05	0.0136317	ENSG00000164823	5	5	761	600	643	1591	632	1943	1259	1429	1033	1931	+	+	+	+	+	+	+	+	+	+
chr8	12395958	12396523	-1.52656	2.09634	17.2904	3.21e-05	0.0136317	ENSG00000154359	3	1	83	42	43	42	38	51	12	20	10	37	+	-	+	+	-	+	-	-	-	-
chr21	9469224	9470043	-1.28174	3.05384	17.1921	3.38e-05	0.0137196	ENSG00000188681	3	1	139	75	125	106	64	60	38	22	21	89	+	-	+	+	-	-	-	-	-	+
chr11	86510924	86511918	0.717145	5.33152	17.1998	3.36e-05	0.0137196	ENSG00000150687	5	5	284	186	197	561	186	632	443	461	411	632	+	+	+	+	+	+	+	+	+	+
chr6	111265864	111266309	-0.859612	4.26254	17.1744	3.41e-05	0.0137418	ENSG00000155115	5	5	202	188	172	269	235	131	145	184	87	132	+	+	+	+	+	+	+	+	+	+
chr7	43714053	43714691	-1.0323	3.49402	17.1396	3.47e-05	0.0138888	ENSG00000106603	5	4	95	121	167	180	115	57	111	59	35	63	+	+	+	+	+	-	+	+	+	+
chr7	132624444	132625143	-0.998788	3.64609	17.1161	3.52e-05	0.0139552	ENSG00000106554	5	5	131	103	148	199	140	105	52	83	84	97	+	+	+	+	+	+	+	+	+	+
chr6	58338303	58338682	1.62115	1.8681	17.0841	3.58e-05	0.0140854	ENSG00000215190	0	3	25	4	22	34	7	87	52	23	29	63	-	-	-	-	-	+	+	-	-	+
chr11	84740982	84741431	-1.18703	2.79239	17.0282	3.68e-05	0.0141864	ENSG00000150672	5	2	81	60	55	143	64	84	43	58	22	39	+	+	+	+	+	+	-	+	-	-
chr12	27031476	27032169	0.762322	5.12857	17.0425	3.66e-05	0.0141864	ENSG00000123104	5	5	154	111	87	370	289	846	248	426	460	557	+	+	+	+	+	+	+	+	+	+
chr9	67831373	67831737	-1.83774	1.07045	17.0323	3.67e-05	0.0141864	ENSG00000170161	3	1	38	21	32	32	12	8	4	2	5	22	+	-	+	+	-	-	-	-	-	+
chr18	48320082	48320692	-1.1155	3.08985	16.963	3.81e-05	0.0145652	ENSG00000082212	2	3	58	89	43	204	104	82	46	85	48	47	-	+	-	+	-	+	-	+	+	-
chr6	128599958	128600337	-1.18035	2.90162	16.9504	3.84e-05	0.0145652	ENSG00000152894	3	2	61	86	45	89	116	113	36	67	26	48	-	+	-	+	+	+	-	+	-	-
chr2	143048468	143049075	1.01742	3.88955	16.9181	3.9e-05	0.0147087	ENSG00000115919	2	5	53	25	24	161	83	430	68	145	336	165	-	-	-	+	+	+	+	+	+	+
chr8	127513052	127513772	-1.19592	3.85308	16.8665	4.01e-05	0.0148021	ENSG00000168672	5	4	103	122	157	140	325	122	74	79	63	90	+	+	+	+	+	+	-	+	+	+
chr10	35929464	35931617	0.60971	6.90999	16.8656	4.01e-05	0.0148021	ENSG00000177283	5	5	862	720	857	1419	641	1483	1598	1362	1103	1502	+	+	+	+	+	+	+	+	+	+
chr4	184019574	184021197	0.725601	5.79145	16.871	4e-05	0.0148021	ENSG00000151718	5	5	373	321	412	844	161	761	702	637	459	780	+	+	+	+	+	+	+	+	+	+
chr3	155455519	155456165	-0.881412	4.44964	16.8517	4.04e-05	0.0148065	ENSG00000114805	5	5	179	190	158	416	231	324	105	220	148	128	+	+	+	+	+	+	+	+	+	+
chr18	67955688	67957374	0.707514	5.78653	16.836	4.08e-05	0.0148258	ENSG00000170677	5	5	453	287	271	674	258	760	777	634	414	889	+	+	+	+	+	+	+	+	+	+
chr7	11415998	11416466	-1.11957	3.0846	16.8184	4.11e-05	0.0148606	ENSG00000106443	5	4	53	140	54	102	128	55	61	79	22	62	+	+	+	+	+	+	+	+	-	+
chr4	34273211	34273474	-1.7893	1.54672	16.7298	4.31e-05	0.0152554	ENSG00000047365	3	0	27	40	45	28	46	21	15	5	5	13	-	+	+	-	+	-	-	-	-	-
chr4	78189186	78189717	1.06023	4.07842	16.7392	4.29e-05	0.0152554	ENSG00000138764	4	5	95	37	58	86	121	457	99	240	241	251	+	-	+	+	+	+	+	+	+	+
chr6	130774275	130774811	-0.761627	4.81586	16.7525	4.26e-05	0.0152554	ENSG00000164484	5	5	227	252	208	419	348	389	153	263	161	252	+	+	+	+	+	+	+	+	+	+
chr5	10649492	10650820	0.948562	4.46229	16.7071	4.36e-05	0.0153356	ENSG00000112977	5	5	161	69	81	180	147	362	276	330	192	365	+	+	+	+	+	+	+	+	+	+
chr6	100881755	100882443	-1.18979	2.73601	16.6842	4.41e-05	0.0154181	ENSG00000112246	3	0	70	48	78	153	50	84	27	35	24	61	+	-	+	+	-	-	-	-	-	-
chr6	134268449	134269280	0.800686	4.48731	16.5916	4.64e-05	0.015855	ENSG00000028839	3	5	68	82	57	208	167	741	149	263	312	253	-	+	-	+	+	+	+	+	+	+
chr6	3023814	3024504	-1.45752	2.9235	16.5965	4.62e-05	0.015855	ENSG00000124588	4	1	44	107	100	187	54	51	30	70	27	30	-	+	+	+	+	-	-	+	-	-
chr2	115374269	115374639	-1.37322	2.07229	16.6046	4.6e-05	0.015855	ENSG00000175497	4	0	45	64	47	44	53	18	19	31	12	28	-	+	+	+	+	-	-	-	-	-
chr12	99288275	99289459	0.746673	4.96542	16.5813	4.66e-05	0.015855	ENSG00000120868	5	5	185	184	120	358	166	544	346	365	333	481	+	+	+	+	+	+	+	+	+	+
chr4	69961141	69961594	-1.25896	2.41213	16.5098	4.84e-05	0.0163581	ENSG00000171234	3	0	54	59	63	100	46	42	35	30	12	41	-	+	+	+	-	-	-	-	-	-
chr7	41068395	41069096	-0.635272	5.6059	16.3082	5.38e-05	0.0180769	ENSG00000122641	5	5	398	497	355	745	561	480	355	432	330	387	+	+	+	+	+	+	+	+	+	+
chr14	41532066	41532584	-0.951411	3.99837	16.2595	5.52e-05	0.0181288	ENSG00000165379	5	5	166	177	121	193	237	116	159	105	58	98	+	+	+	+	+	+	+	+	+	+
chr8	66753603	66755059	0.605097	7.11578	16.2619	5.52e-05	0.0181288	ENSG00000205268	5	5	872	817	694	1783	723	2233	1500	1768	1119	2337	+	+	+	+	+	+	+	+	+	+
chr2	236402177	236403186	0.745096	4.99979	16.2548	5.54e-05	0.0181288	ENSG00000157985	5	5	199	184	203	461	122	328	519	460	228	397	+	+	+	+	+	+	+	+	+	+
chr1	7764224	7764980	0.839419	4.91926	16.2894	5.44e-05	0.0181288	ENSG00000049245	5	5	229	197	197	336	100	247	369	540	243	440	+	+	+	+	+	+	+	+	+	+
chr6	110509937	110510277	-1.22691	2.70261	16.2169	5.65e-05	0.018139	ENSG00000168438	5	3	77	59	52	90	91	53	21	66	33	45	+	+	+	+	+	-	-	+	+	+
chr6	79410813	79411450	-1.32041	3.0112	16.2132	5.66e-05	0.018139	ENSG00000146243	4	1	83	92	83	79	134	55	31	48	24	83	-	+	+	+	+	+	-	-	-	-
chr4	179858358	179858555	-1.22654	2.76813	16.1954	5.71e-05	0.018139	ENSG00000251504	4	2	74	91	42	76	98	43	18	72	37	54	+	+	-	+	+	-	-	+	-	+
chr8	63997980	63999075	0.796506	4.74159	16.2068	5.68e-05	0.018139	ENSG00000137563	5	5	157	129	102	330	133	538	351	363	258	300	+	+	+	+	+	+	+	+	+	+
chr5	92919710	92920478	0.978576	4.16382	16.2024	5.69e-05	0.018139	ENSG00000175745	1	5	147	66	68	200	77	234	331	221	119	281	+	-	-	-	-	+	+	+	+	+
chr9	41953909	41955252	0.685804	5.55464	16.1765	5.77e-05	0.0182114	ENSG00000223839	5	5	342	309	425	428	191	701	527	531	340	737	+	+	+	+	+	+	+	+	+	+
chr3	140758429	140758953	-1.00086	3.45041	16.1122	5.97e-05	0.0183803	ENSG00000114120	5	5	96	156	90	120	142	98	69	86	43	79	+	+	+	+	+	+	+	+	+	+
chr9	79302887	79303276	-1.19537	2.685	16.0472	6.18e-05	0.0183803	ENSG00000106772	4	1	65	63	62	102	66	83	21	54	29	48	+	+	+	+	-	+	-	-	-	-
chr4	22516731	22518112	0.641194	6.58555	16.0375	6.21e-05	0.0183803	ENSG00000152990	5	5	587	564	491	1381	464	1351	1154	1148	833	1556	+	+	+	+	+	+	+	+	+	+
chr12	27485552	27486798	0.787581	5.04826	16.1119	5.97e-05	0.0183803	ENSG00000029153	4	5	172	194	105	426	152	613	344	442	390	461	+	+	-	+	+	+	+	+	+	+
chr10	113298939	113299347	1.32889	2.312	16.04	6.2e-05	0.0183803	ENSG00000150594	1	4	10	4	15	56	31	159	46	54	66	49	-	-	-	+	-	+	+	+	+	-
chr6	62995504	62996567	0.769197	5.74679	16.1399	5.88e-05	0.0183803	ENSG00000112245	5	5	243	342	157	630	313	963	617	684	731	596	+	+	+	+	+	+	+	+	+	+
chr6	127784216	127784535	-1.14635	2.76374	16.0788	6.08e-05	0.0183803	ENSG00000189367	4	1	65	49	45	114	102	85	24	56	46	42	+	-	+	+	+	+	-	-	-	-
chr7	115945936	115946603	-1.4537	3.36361	16.0712	6.1e-05	0.0183803	ENSG00000105971	4	1	40	90	148	268	125	37	27	39	128	32	-	+	+	+	+	-	-	-	+	-
chr1	74808810	74809443	0.80697	5.27407	16.0524	6.16e-05	0.0183803	ENSG00000116783	5	5	199	180	191	348	261	826	397	319	381	759	+	+	+	+	+	+	+	+	+	+
chr5	21236904	21237896	-0.772605	4.75908	16.0406	6.2e-05	0.0183803	ENSG00000183666	5	5	244	282	298	341	296	272	149	185	171	234	+	+	+	+	+	+	+	+	+	+
chr8	53607878	53608285	-0.809603	4.59851	16.0473	6.18e-05	0.0183803	ENSG00000023287	5	5	225	256	272	333	244	228	190	202	95	173	+	+	+	+	+	+	+	+	+	+
chr2	104995327	104995820	1.01441	3.55933	16.0192	6.27e-05	0.0184542	ENSG00000135972	2	5	61	77	55	74	59	251	145	133	102	188	-	+	-	+	-	+	+	+	+	+
chr15	20134059	20134436	-1.58403	1.71539	15.9865	6.38e-05	0.0185873	ENSG00000180229	3	0	64	48	55	39	12	16	14	6	10	12	+	+	+	-	-	-	-	-	-	-
chr2	197457123	197458520	0.695706	5.73469	15.9844	6.39e-05	0.0185873	ENSG00000138411	5	5	282	311	187	738	261	985	568	664	517	854	+	+	+	+	+	+	+	+	+	+
chr4	57953240	57953516	-1.30079	2.20311	15.9392	6.54e-05	0.0189316	ENSG00000163453	5	0	48	51	56	69	52	30	34	31	10	25	+	+	+	+	+	-	-	-	-	-
chr11	2905645	2907608	0.653207	5.80923	15.8903	6.71e-05	0.0193203	ENSG00000129757	5	5	483	364	413	647	209	541	851	784	353	708	+	+	+	+	+	+	+	+	+	+
chr6	141242456	141243021	-0.981751	3.60253	15.855	6.84e-05	0.019365	ENSG00000009844	5	4	135	96	115	186	150	121	68	92	55	103	+	+	+	+	+	+	-	+	+	+
chr10	48354391	48355290	0.634094	6.11576	15.856	6.83e-05	0.019365	ENSG00000204172	5	5	410	410	322	782	447	1009	712	1025	773	869	+	+	+	+	+	+	+	+	+	+
chr1	177980376	177980897	-1.15693	2.70665	15.8682	6.79e-05	0.019365	ENSG00000242193	4	2	71	77	59	99	67	64	35	38	21	63	+	+	-	+	+	+	-	+	-	-
chr2	121199703	121200947	0.750933	5.10793	15.8426	6.88e-05	0.0193872	ENSG00000144118	4	5	213	195	137	420	160	513	337	589	333	521	+	+	-	+	+	+	+	+	+	+
chr14	88495897	88496292	-1.13238	3.31662	15.8277	6.94e-05	0.0194361	ENSG00000258867	5	4	91	93	94	128	144	107	38	108	46	60	+	+	+	+	+	+	+	+	+	-
chr2	132769341	132770042	-1.18805	2.65795	15.8035	7.03e-05	0.0195819	ENSG00000183840	3	3	66	76	66	110	54	60	30	25	27	61	+	+	-	+	-	+	-	-	+	+
chr1	22468649	22470225	0.835555	4.52712	15.7629	7.18e-05	0.019901	ENSG00000162552	1	5	165	153	99	238	106	188	396	357	162	331	-	+	-	-	-	+	+	+	+	+
chr8	121080099	121080849	-0.773409	4.75472	15.7413	7.26e-05	0.0200235	ENSG00000187955	5	5	220	190	170	554	357	296	190	223	221	142	+	+	+	+	+	+	+	+	+	+
chr2	36582186	36584230	0.639656	5.93392	15.7185	7.35e-05	0.0201596	ENSG00000150938	5	5	385	410	441	712	287	865	731	636	577	869	+	+	+	+	+	+	+	+	+	+
chr3	13324007	13325207	0.962598	3.6788	15.6748	7.52e-05	0.0202456	ENSG00000132182	0	5	72	51	54	177	58	148	223	151	88	228	-	-	-	-	-	+	+	+	+	+
chr8	1948973	1950359	0.788722	5.00036	15.6702	7.54e-05	0.0202456	ENSG00000176595	4	5	246	145	131	473	117	483	356	424	312	503	+	+	+	+	-	+	+	+	+	+
chr5	38556179	38557602	0.631167	6.37997	15.6616	7.57e-05	0.0202456	ENSG00000113594	5	5	501	446	425	1289	392	1344	988	950	779	1204	+	+	+	+	+	+	+	+	+	+
chr4	119186442	119187369	0.633801	5.68416	15.6929	7.45e-05	0.0202456	ENSG00000164099	5	5	304	230	291	701	243	1109	457	652	483	739	+	+	+	+	+	+	+	+	+	+
chr16	33046127	33047046	-1.22807	2.69851	15.681	7.5e-05	0.0202456	ENSG00000205456	5	1	109	65	105	67	51	46	32	31	20	38	+	+	+	+	+	-	-	+	-	-
chr10	43585400	43585997	0.766067	4.74684	15.633	7.69e-05	0.0204499	ENSG00000165731	5	5	164	117	102	275	190	406	324	445	246	359	+	+	+	+	+	+	+	+	+	+
chr18	24235700	24237444	0.65223	6.30211	15.6076	7.79e-05	0.0206221	ENSG00000134504	5	5	470	447	342	1144	378	1306	948	899	625	1382	+	+	+	+	+	+	+	+	+	+
chr12	1224710	1225333	-1.42703	2.38404	15.5889	7.87e-05	0.0207223	ENSG00000002016	3	0	69	39	105	67	53	38	29	18	16	18	+	-	+	+	-	-	-	-	-	-
chr5	101990280	101991062	1.08302	3.0108	15.557	8.01e-05	0.0209688	ENSG00000145730	1	5	29	24	28	93	35	208	69	64	151	88	-	-	-	+	-	+	+	+	+	+
chr11	22774451	22774919	1.04016	3.05099	15.5136	8.19e-05	0.0213498	ENSG00000198168	3	5	52	59	40	48	45	90	85	87	115	145	+	+	-	+	-	+	+	+	+	+
chr14	62680109	62680642	-1.10403	2.88263	15.4677	8.39e-05	0.0214473	ENSG00000139973	4	4	57	87	49	110	109	90	47	44	44	33	+	+	-	+	+	+	+	+	+	-
chr7	92392907	92393424	-0.683328	5.09937	15.4833	8.32e-05	0.0214473	ENSG00000105810	5	5	287	314	275	499	426	360	216	290	218	313	+	+	+	+	+	+	+	+	+	+
chr18	2627809	2628284	-1.25696	2.75038	15.4691	8.39e-05	0.0214473	ENSG00000101596	3	1	65	75	73	125	76	16	37	63	19	56	-	+	+	+	-	-	-	+	-	-
chr7	124701973	124702427	-0.95132	3.46259	15.492	8.29e-05	0.0214473	ENSG00000128513	5	5	120	104	131	156	129	70	77	70	55	74	+	+	+	+	+	+	+	+	+	+
chr18	34408328	34409637	0.598428	6.9068	15.4482	8.48e-05	0.0214669	ENSG00000134779	5	5	823	743	655	1529	586	1788	1285	1490	1099	1831	+	+	+	+	+	+	+	+	+	+
chr3	11580925	11581646	-1.12711	2.7919	15.4385	8.52e-05	0.0214669	ENSG00000144560	2	2	55	56	35	166	71	112	35	77	27	37	-	-	-	+	+	+	-	+	-	-
chr2	106360328	106362214	0.690272	5.35306	15.4445	8.5e-05	0.0214669	ENSG00000071051	4	5	306	203	206	526	195	606	621	501	277	583	+	+	+	+	-	+	+	+	+	+
chr4	53727866	53728843	0.621602	5.86014	15.4092	8.66e-05	0.0216979	ENSG00000226950	5	5	377	370	346	652	300	849	551	726	578	927	+	+	+	+	+	+	+	+	+	+
chr12	8191085	8191835	0.639831	5.68969	15.3873	8.76e-05	0.0218471	ENSG00000065970	5	5	292	202	266	629	364	1047	547	596	595	576	+	+	+	+	+	+	+	+	+	+
chr9	14322219	14323133	0.637091	5.81611	15.3395	8.98e-05	0.0220447	ENSG00000147862	5	5	396	347	474	737	203	753	724	576	397	881	+	+	+	+	+	+	+	+	+	+
chr13	91999277	92001598	0.592968	7.62517	15.3057	9.14e-05	0.0220447	ENSG00000215417	5	5	1265	1251	1108	2383	1128	2511	2337	2520	1559	3290	+	+	+	+	+	+	+	+	+	+
chr2	181579670	181580310	-0.973146	3.88281	15.2996	9.17e-05	0.0220447	ENSG00000170035	5	5	99	124	145	227	233	152	68	79	96	136	+	+	+	+	+	+	+	+	+	+
chr8	9791176	9791551	1.11632	2.76444	15.3295	9.03e-05	0.0220447	ENSG00000175806	0	4	47	21	36	49	33	131	75	74	74	109	-	-	-	-	-	+	-	+	+	+
chr5	111004365	111004777	-1.35502	2.30499	15.3455	8.95e-05	0.0220447	ENSG00000164211	3	0	39	58	35	59	103	34	22	18	22	43	-	+	-	+	+	-	-	-	-	-
chr7	27307113	27307310	-2.14347	2.37847	15.3005	9.17e-05	0.0220447	ENSG00000005020	3	0	138	35	179	11	17	8	11	6	2	5	+	+	+	-	-	-	-	-	-	-
chr11	87837561	87837957	-1.03619	2.9799	15.3061	9.14e-05	0.0220447	ENSG00000123892	5	2	83	74	88	133	89	58	59	42	41	43	+	+	+	+	+	-	+	+	-	-
chr5	66700270	66700993	-1.22222	2.59121	15.3563	8.9e-05	0.0220447	ENSG00000069020	3	1	39	55	41	136	77	70	26	14	66	33	-	+	-	+	+	-	-	-	+	-
chr5	11903303	11904876	0.606257	6.26217	15.2843	9.25e-05	0.022123	ENSG00000169862	5	5	551	411	458	1087	376	999	1009	919	629	1088	+	+	+	+	+	+	+	+	+	+
chr18	34973921	34974819	0.603064	6.56037	15.2752	9.29e-05	0.0221287	ENSG00000101489	5	5	605	443	405	1179	559	1693	910	1443	751	1536	+	+	+	+	+	+	+	+	+	+
chr3	35163611	35164042	-1.4279	2.36593	15.219	9.57e-05	0.0224424	ENSG00000170248	5	1	60	53	76	76	63	9	30	22	10	50	+	+	+	+	+	-	-	-	-	+
chr5	126564514	126565582	0.658044	5.1761	15.2195	9.57e-05	0.0224424	ENSG00000164241	5	5	212	150	197	490	190	774	353	376	365	532	+	+	+	+	+	+	+	+	+	+
chr21	9594290	9595300	-1.05452	3.47246	15.2146	9.6e-05	0.0224424	ENSG00000188681	5	3	126	130	172	158	76	77	59	46	35	118	+	+	+	+	+	+	-	+	-	+
chr9	130742644	130743749	0.700168	5.77979	15.2377	9.48e-05	0.0224424	ENSG00000167106	5	5	369	371	369	654	236	479	661	910	444	790	+	+	+	+	+	+	+	+	+	+
chr3	181272142	181272410	-2.04875	1.45345	15.2043	9.65e-05	0.022464	ENSG00000205981	3	0	22	48	44	22	39	6	5	17	1	23	-	+	+	-	+	-	-	-	-	-
chr9	76976431	76976935	-1.1324	3.03502	15.1877	9.73e-05	0.0225623	ENSG00000198963	4	3	75	100	107	108	85	63	52	76	24	41	+	+	+	+	-	+	+	+	-	-
chr14	37795580	37796187	1.32707	3.03182	15.1449	9.96e-05	0.0229781	ENSG00000151338	1	4	9	31	30	35	53	244	41	120	158	76	-	-	-	-	+	+	-	+	+	+
chr4	46447793	46448186	-1.15914	2.36938	15.0988	0.00010203	0.0234433	ENSG00000151834	4	1	39	40	53	112	72	31	29	19	43	27	-	+	+	+	+	-	-	-	+	-
chr10	71210845	71211922	0.720196	4.98731	15.0677	0.000103724	0.0237283	ENSG00000099282	5	5	231	184	203	343	151	444	384	395	354	347	+	+	+	+	+	+	+	+	+	+
chr1	199790241	199790859	1.3642	2.27362	15.0327	0.000105664	0.0239763	ENSG00000116833	0	3	21	12	30	29	24	73	52	46	121	26	-	-	-	-	-	+	-	+	+	-
chr13	73985298	73986139	-0.808061	4.1696	15.0316	0.000105723	0.0239763	ENSG00000102554	5	5	147	192	188	243	238	121	146	113	101	126	+	+	+	+	+	+	+	+	+	+
chr2	170365846	170366151	-1.19844	2.93824	15.021	0.000106321	0.024008	ENSG00000239474	3	2	58	70	58	102	148	59	31	70	29	68	-	+	+	-	+	-	-	+	-	+
chr17	53498625	53499754	0.667355	5.26062	15.0045	0.000107257	0.0240313	ENSG00000108960	5	5	321	233	296	473	127	450	460	513	274	562	+	+	+	+	+	+	+	+	+	+
chr8	80679699	80681209	0.610051	7.01624	15.003	0.000107342	0.0240313	ENSG00000164683	5	5	854	793	696	1741	646	1492	1603	1887	935	2099	+	+	+	+	+	+	+	+	+	+
chr2	148139904	148140532	0.762182	4.83389	14.9926	0.000107931	0.0240604	ENSG00000121989	5	5	102	79	99	357	187	778	157	385	385	409	+	+	+	+	+	+	+	+	+	+
chr2	163262726	163263287	-1.13216	3.63166	14.9773	0.000108814	0.0240709	ENSG00000115271	5	5	110	115	161	135	216	69	87	58	40	97	+	+	+	+	+	+	+	+	+	+
chr18	30761045	30761446	-1.18072	2.99918	14.9758	0.000108897	0.0240709	ENSG00000141431	4	2	84	54	64	129	136	60	42	54	29	79	+	-	+	+	+	-	-	+	+	-
chr4	83706850	83707526	-1.05708	3.69827	14.9641	0.000109575	0.0241189	ENSG00000145284	5	3	106	134	129	194	160	139	116	96	26	97	+	+	+	+	+	+	+	+	-	-
chr2	76420285	76420697	-1.03909	2.91764	14.9529	0.00011023	0.024137	ENSG00000005436	5	2	87	104	80	77	89	34	51	59	29	47	+	+	+	+	+	-	+	+	-	-
chr2	42647995	42648568	-1.21532	2.40529	14.9469	0.000110578	0.024137	ENSG00000115944	3	1	71	55	57	84	46	52	33	32	17	29	+	-	+	+	-	+	-	-	-	-
chr4	176872909	176873552	-0.89992	3.64943	14.9048	0.000113075	0.024478	ENSG00000150625	5	5	107	93	155	262	132	89	94	87	62	81	+	+	+	+	+	+	+	+	+	+
chr10	44806215	44807055	0.697601	4.85861	14.9066	0.000112968	0.024478	ENSG00000107562	5	5	177	173	124	311	161	544	329	362	280	397	+	+	+	+	+	+	+	+	+	+
chr4	17959430	17960239	-0.958037	3.33871	14.8812	0.0001145	0.0245644	ENSG00000178177	5	3	100	103	88	183	93	112	47	58	70	87	+	+	+	+	+	+	-	-	+	+
chr18	60986938	60988308	0.654421	5.39249	14.887	0.000114144	0.0245644	ENSG00000171791	5	5	269	236	214	568	221	573	561	490	356	633	+	+	+	+	+	+	+	+	+	+
chr10	23727518	23729576	0.574343	7.06398	14.8749	0.000114881	0.0245644	ENSG00000165312	5	5	932	894	811	1569	698	1779	1620	1617	1035	2098	+	+	+	+	+	+	+	+	+	+
chr5	162872372	162873004	-1.16534	2.30427	14.8474	0.00011657	0.0246241	ENSG00000113328	3	1	47	54	33	89	58	42	30	43	16	38	-	+	-	+	+	+	-	-	-	-
chr7	38488378	38488851	-1.11387	3.34448	14.8622	0.00011566	0.0246241	ENSG00000078053	5	0	84	108	132	100	174	50	43	60	53	80	+	+	+	+	+	-	-	-	-	-
chr5	121828860	121829789	0.740088	5.3295	14.8536	0.000116186	0.0246241	ENSG00000064692	5	5	164	146	82	388	354	1006	268	505	464	735	+	+	+	+	+	+	+	+	+	+
chr12	78282398	78282803	-0.99438	3.29734	14.8133	0.000118695	0.0248723	ENSG00000067798	4	4	95	109	96	125	132	59	69	98	46	45	-	+	+	+	+	+	+	+	+	-
chr2	213159535	213160000	1.02921	3.30551	14.8165	0.000118493	0.0248723	ENSG00000030419	1	5	27	41	18	51	97	274	69	83	167	137	-	-	-	-	+	+	+	+	+	+
chr6	157956547	157957215	-0.894091	3.79167	14.7835	0.000120584	0.0250676	ENSG00000175048	5	5	133	156	124	208	152	105	70	97	85	135	+	+	+	+	+	+	+	+	+	+
chr18	21977108	21978175	0.809534	5.14098	14.7842	0.000120543	0.0250676	ENSG00000141447	5	5	274	282	211	387	84	514	452	339	248	654	+	+	+	+	+	+	+	+	+	+
chr18	64819380	64819862	-1.14143	3.00847	14.77	0.000121453	0.0251484	ENSG00000071991	4	2	72	98	77	107	110	57	32	31	49	86	-	+	+	+	+	-	-	-	+	+
chr7	86688461	86689623	0.601775	6.57832	14.7381	0.000123522	0.0254762	ENSG00000164659	5	5	625	545	480	1329	472	1415	1000	1283	857	1495	+	+	+	+	+	+	+	+	+	+
chr18	55469719	55471024	0.728919	5.02257	14.7297	0.000124074	0.0254898	ENSG00000081923	5	5	256	169	282	541	80	273	447	325	218	569	+	+	+	+	+	+	+	+	+	+
chr3	179968004	179968391	-1.28594	2.19632	14.7148	0.000125063	0.0255925	ENSG00000114757	3	0	34	53	45	78	58	28	30	40	8	37	-	+	-	+	+	-	-	-	-	-
chr3	179680552	179681084	-1.3295	2.89249	14.6911	0.000126644	0.0258153	ENSG00000114757	3	2	70	86	42	110	111	76	24	29	29	107	-	+	-	+	+	+	-	-	-	+
chr8	58429376	58429684	-1.25416	3.281	14.6459	0.000129715	0.0263387	ENSG00000169122	4	2	93	96	126	109	140	81	47	60	23	95	+	+	+	-	+	-	-	+	-	+
chr18	42988064	42988636	-1.15925	3.09249	14.634	0.000130541	0.0263999	ENSG00000141469	5	3	68	41	99	125	171	82	45	47	54	34	+	+	+	+	+	+	-	+	+	-
chr2	160612355	160612818	-0.977189	3.27471	14.627	0.000131024	0.0263999	ENSG00000241399	5	5	97	92	92	199	100	49	68	73	57	58	+	+	+	+	+	+	+	+	+	+
chr4	24913826	24914868	0.577804	6.31154	14.5681	0.000135182	0.0264402	ENSG00000181982	5	5	507	410	433	1153	397	1315	829	953	667	1298	+	+	+	+	+	+	+	+	+	+
chr3	96688976	96689843	-0.915066	3.67767	14.5362	0.000137494	0.0264402	ENSG00000113966	5	3	137	139	105	139	174	116	69	100	64	112	+	+	+	+	+	-	-	+	+	+
chr11	82443825	82445162	0.723655	4.95319	14.546	0.000136776	0.0264402	ENSG00000137509	5	5	189	160	147	467	137	437	346	365	328	487	+	+	+	+	+	+	+	+	+	+
chr6	143159951	143160608	-0.80352	4.20416	14.5433	0.000136978	0.0264402	ENSG00000010818	5	5	163	148	169	284	238	188	105	148	114	154	+	+	+	+	+	+	+	+	+	+
chr7	138927558	138928016	-1.06123	2.86143	14.5765	0.000134579	0.0264402	ENSG00000157741	4	2	70	60	77	129	89	53	40	62	34	48	+	-	+	+	+	-	+	+	-	-
chr4	114579060	114579513	-0.997586	3.16467	14.5917	0.000133502	0.0264402	ENSG00000145349	5	3	78	72	74	153	125	89	38	54	63	82	+	+	+	+	+	+	-	-	+	+
chr7	44662316	44662692	-1.32335	1.958	14.5322	0.000137786	0.0264402	ENSG00000105953	3	0	53	33	73	70	22	17	13	16	15	28	+	-	+	+	-	-	-	-	-	-
chr2	135475465	135477087	0.632037	5.35646	14.5664	0.000135306	0.0264402	ENSG00000152128	5	5	276	212	216	510	231	654	470	460	378	626	+	+	+	+	+	+	+	+	+	+
chr3	186544706	186545683	0.659244	5.08535	14.6019	0.000132779	0.0264402	ENSG00000232233	5	5	210	183	184	430	173	506	378	510	275	503	+	+	+	+	+	+	+	+	+	+
chr3	108907532	108908196	0.920432	3.86111	14.5898	0.000133638	0.0264402	ENSG00000198919	4	5	72	49	41	166	80	413	177	140	137	202	+	+	-	+	+	+	+	+	+	+
chr1	143434709	143434968	-1.35523	2.54354	14.5811	0.000134254	0.0264402	ENSG00000196369	4	0	96	43	93	67	61	41	39	28	12	28	+	-	+	+	+	-	-	-	-	-
chr8	16916072	16916800	-0.923778	4.06008	14.6081	0.000132348	0.0264402	ENSG00000155970	5	5	130	208	119	194	228	194	70	112	92	189	+	+	+	+	+	+	+	+	+	+
chr8	109799195	109800020	0.610918	5.57844	14.5496	0.000136519	0.0264402	ENSG00000104412	5	5	247	274	202	523	341	952	549	591	438	621	+	+	+	+	+	+	+	+	+	+
chr10	133109128	133111053	0.693085	5.11026	14.5073	0.000139618	0.0265007	ENSG00000176769	4	5	197	174	125	390	227	548	325	566	353	512	+	+	-	+	+	+	+	+	+	+
chr1	200992645	200993011	0.925872	3.79328	14.5118	0.000139286	0.0265007	ENSG00000116852	5	5	95	68	87	172	50	131	189	217	132	182	+	+	+	+	+	+	+	+	+	+
chr13	84660172	84661118	1.03742	3.52059	14.5181	0.000138816	0.0265007	ENSG00000184564	2	5	81	80	33	77	55	168	162	115	88	244	-	+	-	+	-	+	+	+	+	+
chr3	40284656	40284921	-1.35611	1.69154	14.4877	0.000141079	0.0266812	ENSG00000114784	3	0	36	51	24	44	36	16	13	18	14	27	-	+	-	+	+	-	-	-	-	-
chr3	190231245	190232150	0.578708	6.4408	14.4687	0.000142506	0.0268542	ENSG00000196083	5	5	582	431	539	1245	457	1264	873	923	918	1331	+	+	+	+	+	+	+	+	+	+
chr3	32299036	32299425	-1.3292	3.30212	14.4535	0.000143663	0.0269753	ENSG00000170293	5	3	59	110	64	182	155	160	89	44	25	37	+	+	+	+	+	+	+	+	-	-
chr5	159860842	159861487	0.728878	4.67471	14.4024	0.000147618	0.0274228	ENSG00000164611	5	5	148	100	131	260	172	497	232	356	285	337	+	+	+	+	+	+	+	+	+	+
chr12	32721283	32721577	-1.14814	2.67041	14.4029	0.000147572	0.0274228	ENSG00000087470	3	1	64	69	61	108	74	58	44	20	45	27	-	+	-	+	+	-	-	-	+	-
chr7	18331911	18332595	-0.912144	3.62567	14.4039	0.000147496	0.0274228	ENSG00000048052	5	5	82	113	77	220	173	182	69	75	78	101	+	+	+	+	+	+	+	+	+	+
chr9	22158418	22158669	-1.30109	2.1653	14.3844	0.000149035	0.0274911	ENSG00000147883	3	1	56	41	52	57	61	20	27	41	12	24	+	-	-	+	+	-	-	+	-	-
chr5	94619460	94621129	0.762692	5.89351	14.3856	0.00014894	0.0274911	ENSG00000175471	5	5	368	361	225	814	242	1029	726	648	677	807	+	+	+	+	+	+	+	+	+	+
chr3	155587908	155589616	0.587685	7.36528	14.372	0.000150015	0.0275749	ENSG00000163655	5	5	1095	1043	955	2184	787	2332	1727	2085	1606	2388	+	+	+	+	+	+	+	+	+	+
chr1	89817692	89818022	-1.26732	2.47084	14.312	0.000154872	0.027946	ENSG00000162654	2	3	53	97	23	84	38	76	12	48	35	43	-	+	-	+	-	+	-	-	+	+
chr10	44143705	44144832	0.589146	5.7481	14.3038	0.000155553	0.027946	ENSG00000169740	5	5	285	291	267	677	352	917	559	695	508	779	+	+	+	+	+	+	+	+	+	+
chr1	184761436	184762088	-0.811222	4.9521	14.3378	0.000152766	0.027946	ENSG00000116406	5	5	286	226	357	626	287	280	185	316	185	166	+	+	+	+	+	+	+	+	+	+
chr3	159480890	159482590	0.689287	5.60752	14.3119	0.000154883	0.027946	ENSG00000151967	5	5	321	321	312	625	186	777	648	484	454	629	+	+	+	+	+	+	+	+	+	+
chr8	40500772	40501133	-1.48326	2.61046	14.3129	0.000154804	0.027946	ENSG00000165061	5	3	81	55	60	57	116	26	37	37	9	52	+	+	+	+	+	-	+	+	-	+
chr3	5228709	5230164	0.588425	7.24881	14.3012	0.000155768	0.027946	ENSG00000134109	5	5	1114	990	1007	1923	638	2023	1502	2004	1373	2312	+	+	+	+	+	+	+	+	+	+
chr12	50262795	50263446	0.863484	3.9912	14.3109	0.000154968	0.027946	ENSG00000186666	5	5	100	98	55	124	58	442	124	190	167	239	+	+	+	+	+	+	+	+	+	+
chr6	116303519	116303903	-1.21771	3.4181	14.2618	0.000159062	0.0284395	ENSG00000111816	4	3	56	167	140	169	104	86	40	77	64	56	-	+	+	+	+	-	-	+	+	+
chr3	75667637	75669304	0.601081	5.86842	14.2506	0.000160009	0.0284932	ENSG00000242516	5	5	316	324	327	740	341	1011	583	659	541	970	+	+	+	+	+	+	+	+	+	+
chr8	94468226	94469234	-0.739259	4.52265	14.2454	0.00016045	0.0284932	ENSG00000188343	5	5	200	256	192	311	245	261	141	220	134	169	+	+	+	+	+	+	+	+	+	+
chr8	132925282	132925627	-0.93929	3.23055	14.1582	0.000168061	0.0293042	ENSG00000132294	4	2	85	99	76	122	138	76	50	59	68	69	+	+	+	-	+	+	-	-	+	-
chr6	121339957	121340620	-1.0949	2.68038	14.1362	0.000170044	0.0293042	ENSG00000146350	4	2	53	60	64	96	104	27	28	36	56	40	-	+	+	+	+	-	-	+	+	-
chr3	71802399	71803966	0.754475	4.70335	14.162	0.000167726	0.0293042	ENSG00000163412	4	5	161	97	82	355	158	462	337	350	224	382	+	-	+	+	+	+	+	+	+	+
chr2	196932917	196933966	0.572885	6.27747	14.1361	0.000170052	0.0293042	ENSG00000081320	5	5	503	498	600	812	446	1112	841	795	768	1080	+	+	+	+	+	+	+	+	+	+
chr18	61758220	61759228	-1.06184	3.62898	14.1817	0.000165975	0.0293042	ENSG00000166401	4	3	127	104	161	147	158	123	57	109	51	81	-	+	+	+	+	+	-	+	-	+
chr1	82644848	82645348	1.10609	3.6764	14.1424	0.000169483	0.0293042	ENSG00000117114	2	5	59	26	40	101	129	170	148	176	162	215	-	-	-	+	+	+	+	+	+	+
chr1	241803136	241804111	0.628024	5.68245	14.1537	0.000168469	0.0293042	ENSG00000203668	5	5	322	345	363	651	233	548	611	717	412	767	+	+	+	+	+	+	+	+	+	+
chr6	17865716	17866376	-0.824441	3.99295	14.1739	0.000166665	0.0293042	ENSG00000137177	5	4	142	139	179	266	179	107	119	134	73	122	+	+	+	+	+	+	+	+	-	+
chr4	166705682	166706112	1.2471	2.24791	14.1388	0.000169803	0.0293042	ENSG00000109472	0	5	11	23	16	34	24	109	56	57	37	91	-	-	-	-	-	+	+	+	+	+
chr2	181474416	181474931	-1.28504	2.95392	14.1136	0.000172096	0.0295593	ENSG00000170035	4	3	50	84	101	101	127	49	30	49	26	72	-	+	+	+	+	+	-	+	-	+
chr16	54025042	54025551	-1.14721	2.49403	14.0407	0.000178895	0.0299131	ENSG00000140718	4	1	60	47	62	83	71	51	23	42	27	41	+	-	+	+	+	-	-	+	-	-
chr4	169019108	169019868	-0.850836	4.23451	14.0363	0.000179318	0.0299131	ENSG00000109511	5	5	116	197	210	307	236	175	168	105	95	113	+	+	+	+	+	+	+	+	+	+
chr7	133032903	133033487	-0.989106	4.41925	14.0448	0.00017851	0.0299131	ENSG00000131558	5	5	186	253	235	208	318	110	102	207	79	201	+	+	+	+	+	+	+	+	+	+
chr3	175838310	175839054	-1.0337	2.94541	14.08	0.000175194	0.0299131	ENSG00000177565	3	4	49	70	32	154	105	145	40	44	45	56	-	+	-	+	+	+	+	-	+	+
chr4	124261157	124261762	-0.790284	4.13379	14.0355	0.000179392	0.0299131	ENSG00000164056	5	5	173	157	136	299	209	150	150	135	103	109	+	+	+	+	+	+	+	+	+	+
chr12	72494523	72495194	-0.944232	4.28331	14.0462	0.000178374	0.0299131	ENSG00000121749	5	5	122	263	173	212	299	173	97	128	96	192	+	+	+	+	+	+	+	+	+	+
chr13	101240564	101241327	0.763436	4.78147	14.0246	0.000180437	0.0299131	ENSG00000134864	5	5	188	171	174	337	83	450	313	419	222	347	+	+	+	+	+	+	+	+	+	+
chr3	64430569	64431447	0.842348	4.09776	14.0302	0.000179894	0.0299131	ENSG00000163637	4	5	101	81	114	252	57	263	206	182	199	213	+	-	+	+	+	+	+	+	+	+
chr11	30606782	30608476	0.654281	5.72314	14.0269	0.000180218	0.0299131	ENSG00000066382	5	5	289	412	210	506	274	1125	512	600	510	814	+	+	+	+	+	+	+	+	+	+
chr2	235404727	235406116	0.78709	4.7424	14.0704	0.000176095	0.0299131	ENSG00000188042	4	5	261	130	142	323	96	292	388	388	198	367	+	+	-	+	+	+	+	+	+	+
chr7	114169978	114170564	-0.946173	3.76747	14.0744	0.000175715	0.0299131	ENSG00000135272	5	5	112	159	113	203	138	164	46	78	97	159	+	+	+	+	+	+	+	+	+	+
chr1	247494287	247495932	0.581414	5.88412	14.0134	0.000181513	0.0299966	ENSG00000162714	5	5	399	349	385	730	312	761	702	742	438	955	+	+	+	+	+	+	+	+	+	+
chr9	114189427	114189747	-1.36701	1.92146	14.0015	0.000182665	0.030092	ENSG00000136813	3	1	45	17	43	68	51	44	13	18	19	23	-	-	+	+	+	+	-	-	-	-
chr10	21976262	21976473	-1.36791	2.10813	13.9864	0.000184137	0.0301512	ENSG00000078403	5	0	54	51	48	47	54	25	22	25	7	43	+	+	+	+	+	-	-	-	-	-
chr6	53480406	53481028	-0.630399	5.31557	13.9733	0.000185428	0.0301512	ENSG00000001084	5	5	315	420	387	569	433	341	288	313	254	341	+	+	+	+	+	+	+	+	+	+
chr4	59515290	59515775	1.58672	1.72533	13.9705	0.000185702	0.0301512	ENSG00000163453	0	3	12	4	13	9	18	119	28	23	47	40	-	-	-	-	-	+	-	-	+	+
chr4	56212099	56213275	0.579257	6.6169	13.9822	0.000184549	0.0301512	ENSG00000128039	5	5	538	632	549	1218	554	1531	991	1243	910	1527	+	+	+	+	+	+	+	+	+	+
chr1	157015237	157016199	0.62266	5.61426	13.9685	0.000185902	0.0301512	ENSG00000132694	5	5	348	364	325	552	210	522	569	725	374	728	+	+	+	+	+	+	+	+	+	+
chr10	42862899	42863823	0.679759	5.07049	13.9483	0.000187903	0.0302883	ENSG00000185904	5	5	235	184	189	285	159	781	285	473	258	518	+	+	+	+	+	+	+	+	+	+
chr2	51230814	51231036	-1.3012	2.12128	13.9491	0.000187827	0.0302883	ENSG00000179915	3	0	57	35	34	60	64	43	21	20	15	40	-	-	+	+	+	-	-	-	-	-
chr10	82213513	82214810	0.652156	6.03417	13.9324	0.000189508	0.0304532	ENSG00000108219	5	5	509	433	400	892	238	728	877	898	526	855	+	+	+	+	+	+	+	+	+	+
chr12	62756166	62756697	-1.09068	2.72973	13.9127	0.000191504	0.0306799	ENSG00000198673	5	4	61	75	75	91	84	50	41	32	27	55	+	+	+	+	+	+	+	-	+	+
chr10	63004067	63004601	0.99217	3.3431	13.8989	0.000192909	0.0307041	ENSG00000072422	2	5	30	32	33	75	90	292	97	92	129	134	-	-	-	+	+	+	+	+	+	+
chr12	20720390	20720687	-1.20337	2.74962	13.8842	0.000194431	0.0307041	ENSG00000172572	5	3	77	42	63	121	77	99	41	42	15	54	+	+	+	+	+	+	-	+	-	+
chr7	17358891	17360626	-0.913093	4.0528	13.8827	0.000194585	0.0307041	ENSG00000106546	4	2	121	171	206	247	184	187	105	102	76	128	+	+	-	+	+	+	-	+	-	-
chr2	18059201	18060876	0.681867	5.05493	13.8902	0.000193804	0.0307041	ENSG00000170745	5	5	256	194	255	403	134	359	446	474	268	391	+	+	+	+	+	+	+	+	+	+
chr1	166944404	166945276	0.707538	4.74464	13.8945	0.000193362	0.0307041	ENSG00000143195	5	5	163	167	130	334	127	400	354	310	211	438	+	+	+	+	+	+	+	+	+	+
chr21	29625575	29626007	-0.942512	3.47753	13.8554	0.000197429	0.0310591	ENSG00000156239	4	4	99	80	113	206	141	104	63	82	86	51	+	-	+	+	+	+	+	+	+	-
chr2	181385693	181386481	-0.639862	5.74233	13.8336	0.000199731	0.0312996	ENSG00000170035	5	5	386	540	428	713	695	526	279	392	455	531	+	+	+	+	+	+	+	+	+	+
chr13	95952949	95954217	0.616906	5.35742	13.8182	0.000201376	0.0312996	ENSG00000125257	5	5	244	217	290	552	215	568	447	448	376	658	+	+	+	+	+	+	+	+	+	+
chr5	64197995	64198262	-1.11496	2.39574	13.8074	0.000202542	0.0312996	ENSG00000153015	4	0	47	58	51	64	89	23	31	32	30	32	+	+	-	+	+	-	-	-	-	-
chr3	14644156	14644775	1.12414	2.41288	13.8099	0.000202268	0.0312996	ENSG00000154781	0	4	37	23	27	46	17	78	85	72	31	87	-	-	-	-	-	+	+	+	-	+
chr8	48649715	48651669	0.629893	6.28875	13.8267	0.000200469	0.0312996	ENSG00000221869	5	5	532	462	491	1169	300	1215	979	727	701	1153	+	+	+	+	+	+	+	+	+	+
chr1	175360079	175360303	-1.66342	1.85567	13.8129	0.000201946	0.0312996	ENSG00000235750	3	0	42	30	46	45	50	26	14	28	2	35	+	-	+	-	+	-	-	-	-	-
chr13	76007046	76007443	-1.08347	2.93458	13.8007	0.000203262	0.0313185	ENSG00000136111	5	3	75	63	96	101	109	67	51	48	35	36	+	+	+	+	+	+	+	+	-	-
chr1	159823757	159825023	0.595581	5.78843	13.7859	0.000204867	0.0314732	ENSG00000188004	5	5	420	381	329	566	270	722	556	710	419	1015	+	+	+	+	+	+	+	+	+	+
chr12	40631981	40632491	-1.01326	3.28177	13.7307	0.000210972	0.0322621	ENSG00000188906	5	5	82	58	76	181	174	65	89	65	36	67	+	+	+	+	+	+	+	+	+	+
chr5	58592056	58593028	-0.759288	4.25943	13.7284	0.000211233	0.0322621	ENSG00000152932	5	5	149	184	141	340	223	225	138	128	135	134	+	+	+	+	+	+	+	+	+	+
chr5	110559339	110560461	0.642425	5.61086	13.7131	0.000212964	0.0322637	ENSG00000134987	5	5	334	326	243	585	224	780	538	491	439	859	+	+	+	+	+	+	+	+	+	+
chr10	14596809	14597150	-0.937437	3.3948	13.712	0.000213092	0.0322637	ENSG00000151474	5	5	87	138	85	140	128	80	48	97	67	79	+	+	+	+	+	+	+	+	+	+
chr18	21851217	21852298	0.656006	5.61112	13.7137	0.000212897	0.0322637	ENSG00000141447	5	5	299	308	261	674	230	664	656	608	495	559	+	+	+	+	+	+	+	+	+	+
chr6	105850433	105851586	0.567459	6.61182	13.6993	0.000214535	0.0323107	ENSG00000085377	5	5	542	551	576	1340	582	1400	1043	1220	881	1530	+	+	+	+	+	+	+	+	+	+
chr16	88519111	88519930	0.720287	5.26278	13.6966	0.000214848	0.0323107	ENSG00000179588	5	5	361	274	334	436	99	241	564	577	235	485	+	+	+	+	+	+	+	+	+	+
chr3	168365081	168365807	-0.843944	3.73684	13.693	0.000215253	0.0323107	ENSG00000242268	5	4	108	121	100	215	167	157	65	80	132	88	+	+	+	+	+	+	-	+	+	+
chr14	81769550	81770183	-0.644769	5.07056	13.6733	0.000217524	0.0323734	ENSG00000165417	5	5	303	325	374	432	384	228	280	287	199	217	+	+	+	+	+	+	+	+	+	+
chr2	150186331	150187557	0.600287	5.97056	13.6756	0.000217262	0.0323734	ENSG00000168288	5	5	446	365	395	907	246	971	742	755	512	863	+	+	+	+	+	+	+	+	+	+
chr2	9346344	9347931	0.723442	4.99923	13.6808	0.000216663	0.0323734	ENSG00000151693	5	5	243	170	163	434	133	340	525	492	225	375	+	+	+	+	+	+	+	+	+	+
chr3	72388050	72388698	-0.750505	4.57639	13.66	0.00021907	0.0324275	ENSG00000241163	5	5	245	338	246	289	220	119	184	134	129	213	+	+	+	+	+	+	+	+	+	+
chr10	15412365	15413540	0.721046	4.75686	13.6595	0.000219125	0.0324275	ENSG00000148468	5	5	219	127	164	340	118	246	483	385	148	371	+	+	+	+	+	+	+	+	+	+
chr12	40296605	40297073	-0.784542	4.15696	13.636	0.000221891	0.0327443	ENSG00000151229	5	5	133	184	142	276	217	191	93	106	159	147	+	+	+	+	+	+	+	+	+	+
chr11	95153146	95153354	-1.20938	2.21484	13.6233	0.000223399	0.032782	ENSG00000149212	4	0	37	51	47	78	59	33	19	29	21	42	-	+	+	+	+	-	-	-	-	-
chr14	69671460	69671857	-1.3125	2.29295	13.6266	0.000223002	0.032782	ENSG00000081177	2	2	59	33	36	75	74	40	18	49	14	47	-	-	-	+	+	-	-	+	-	+
chr3	168904463	168904927	-1.0679	3.08272	13.6165	0.000224211	0.0328094	ENSG00000242268	5	2	77	129	72	125	88	32	42	94	41	55	+	+	+	+	+	-	-	+	-	+
chr10	64377583	64377983	1.17357	2.95835	13.6069	0.000225358	0.0328854	ENSG00000181915	1	5	30	8	25	53	61	256	70	82	107	79	-	-	-	-	+	+	+	+	+	+
chr6	73972498	73973429	0.662778	4.86888	13.5822	0.000228345	0.0331211	ENSG00000135314	5	5	178	136	129	386	161	520	280	374	300	448	+	+	+	+	+	+	+	+	+	+
chr12	122018116	122018593	-1.09017	2.65064	13.585	0.000228003	0.0331211	ENSG00000089094	2	2	57	86	66	112	42	42	39	67	16	44	-	+	-	+	-	-	+	+	-	-
chr5	108723060	108723845	-0.86448	3.91544	13.5778	0.000228871	0.0331211	ENSG00000198961	5	5	120	140	147	243	198	111	96	118	71	145	+	+	+	+	+	+	+	+	+	+
chr11	83294902	83295485	-0.921291	3.6619	13.5647	0.000230484	0.0331897	ENSG00000137500	5	5	91	126	126	273	128	88	69	110	79	90	+	+	+	+	+	+	+	+	+	+
chr18	38490924	38491800	-1.21189	2.57203	13.5597	0.000231096	0.0331897	ENSG00000267313	3	0	77	81	49	51	75	64	33	50	22	20	+	+	+	-	-	-	-	-	-	-
chr12	131145845	131146347	-1.20427	2.52279	13.5585	0.000231245	0.0331897	ENSG00000060709	4	3	67	50	47	74	74	76	20	27	23	68	+	+	-	+	+	+	-	-	+	+
chr2	66774839	66775249	-1.28528	1.89304	13.5528	0.000231942	0.0331988	ENSG00000143995	3	1	42	20	40	62	50	32	10	11	34	28	+	-	+	-	+	-	-	-	+	-
chr7	90590721	90591208	-1.11373	3.34519	13.5444	0.00023299	0.0332096	ENSG00000157240	5	3	113	81	98	122	169	89	75	53	31	82	+	+	+	+	+	+	+	+	-	-
chr10	68875820	68876042	-1.07038	2.92574	13.542	0.000233286	0.0332096	ENSG00000198739	4	2	75	77	74	118	86	77	54	45	20	70	+	+	+	+	-	-	+	-	-	+
chr18	64668019	64668586	-0.944107	3.39087	13.524	0.000235532	0.0333185	ENSG00000071991	5	5	99	125	95	132	119	120	55	63	53	96	+	+	+	+	+	+	+	+	+	+
chr2	20850189	20851403	0.646066	5.64746	13.5224	0.000235731	0.0333185	ENSG00000118960	5	5	298	306	343	638	215	745	458	700	515	697	+	+	+	+	+	+	+	+	+	+
chr1	56974210	56974507	-1.21657	2.1144	13.5206	0.000235959	0.0333185	ENSG00000162407	4	1	45	40	76	87	27	15	46	18	8	19	+	+	+	+	-	-	+	-	-	-
chr6	10720426	10721200	0.809424	4.0357	13.5021	0.000238292	0.0335575	ENSG00000111843	2	5	125	71	87	197	56	336	154	196	164	242	+	-	-	+	-	+	+	+	+	+
chr3	3840348	3842225	0.622471	5.81798	13.495	0.000239205	0.0335958	ENSG00000175928	5	5	351	349	325	799	249	858	649	616	574	776	+	+	+	+	+	+	+	+	+	+
chr8	28269173	28269972	0.674664	5.09783	13.476	0.000241633	0.033846	ENSG00000186918	5	5	200	198	199	456	159	495	351	478	366	451	+	+	+	+	+	+	+	+	+	+
chr14	50919667	50920453	-0.729551	4.87041	13.4443	0.000245746	0.0339709	ENSG00000100490	5	5	262	297	303	324	380	223	182	252	149	274	+	+	+	+	+	+	+	+	+	+
chr3	196695287	196697089	0.659327	4.85982	13.4481	0.000245255	0.0339709	ENSG00000119227	5	5	188	181	167	363	137	353	377	402	211	449	+	+	+	+	+	+	+	+	+	+
chr1	179279935	179280254	-1.23334	2.23013	13.4547	0.000244392	0.0339709	ENSG00000057252	4	1	45	41	51	80	59	33	15	42	26	28	-	+	+	+	+	-	-	+	-	-
chr3	144112879	144113268	-1.23541	2.55876	13.4633	0.000243282	0.0339709	ENSG00000181744	4	2	64	79	80	45	82	22	40	38	10	43	+	+	+	-	+	-	-	+	-	+
chr7	129419209	129420612	0.591541	6.05113	13.4442	0.000245767	0.0339709	ENSG00000106459	5	5	453	488	472	730	341	592	818	957	514	956	+	+	+	+	+	+	+	+	+	+
chr22	22741342	22741887	-1.2193	2.49627	13.4318	0.000247399	0.0341065	ENSG00000100038	3	3	44	60	27	116	60	75	39	78	16	15	-	+	-	+	+	+	+	+	-	-
chr1	217833603	217834442	-0.947551	3.6651	13.3965	0.00025209	0.034662	ENSG00000162814	5	4	120	142	127	137	189	85	95	76	47	109	+	+	+	+	+	+	+	+	-	+
chr5	37248737	37250080	0.570377	5.94417	13.3674	0.000256037	0.034839	ENSG00000197603	5	5	371	326	353	896	313	1072	659	722	581	840	+	+	+	+	+	+	+	+	+	+
chr6	166075637	166077163	0.819583	4.91787	13.3696	0.000255743	0.034839	ENSG00000112541	3	5	178	187	122	437	120	381	435	300	301	503	-	+	+	+	-	+	+	+	+	+
chr10	61192281	61192698	-1.06361	3.54615	13.3772	0.000254702	0.034839	ENSG00000148541	5	5	120	72	132	158	183	120	71	76	43	91	+	+	+	+	+	+	+	+	+	+
chr3	167379345	167379886	1.18418	2.66226	13.3701	0.000255662	0.034839	ENSG00000114209	0	3	22	26	16	34	41	107	42	22	169	105	-	-	-	-	-	+	-	-	+	+
chr2	153191401	153192831	0.631441	6.02359	13.3597	0.000257095	0.0348923	ENSG00000157827	5	5	361	473	394	770	296	1084	692	676	619	1032	+	+	+	+	+	+	+	+	+	+
chr1	108075019	108075549	0.69499	4.59116	13.3365	0.000260295	0.0352078	ENSG00000134215	5	5	168	149	123	235	116	454	265	311	201	345	+	+	+	+	+	+	+	+	+	+
chr9	14992966	14993782	0.673918	5.2357	13.3199	0.000262599	0.0352078	ENSG00000175893	5	5	269	221	265	420	120	814	345	465	284	568	+	+	+	+	+	+	+	+	+	+
chr9	66457702	66458789	0.594368	5.97427	13.3186	0.00026278	0.0352078	ENSG00000238113	5	5	588	411	335	520	294	1252	570	670	526	1020	+	+	+	+	+	+	+	+	+	+
chr1	229477779	229479065	0.623773	5.52634	13.3199	0.000262602	0.0352078	ENSG00000154429	5	5	298	289	274	661	191	524	563	660	323	751	+	+	+	+	+	+	+	+	+	+
chr3	69939290	69939538	-1.22083	2.28222	13.3231	0.000262153	0.0352078	ENSG00000187098	3	0	37	77	52	52	62	36	19	40	27	20	-	+	-	+	+	-	-	-	-	-
chr11	18400735	18401218	0.890632	3.42519	13.3059	0.000264572	0.0352676	ENSG00000134333	2	5	45	41	25	101	66	304	96	147	97	166	-	-	-	+	+	+	+	+	+	+
chr8	95036745	95037370	-0.881471	3.90227	13.3065	0.000264489	0.0352676	ENSG00000164951	5	5	139	167	163	171	190	134	101	80	72	125	+	+	+	+	+	+	+	+	+	+
chr2	42274453	42275831	0.61408	5.5313	13.2964	0.000265922	0.0353576	ENSG00000162878	5	5	361	284	274	601	206	463	697	637	300	647	+	+	+	+	+	+	+	+	+	+
chr8	73786617	73787366	0.711306	4.58893	13.2628	0.000270726	0.035547	ENSG00000147601	5	5	110	96	87	308	142	648	276	298	177	331	+	+	+	+	+	+	+	+	+	+
chr15	83669863	83670398	-1.25734	3.02128	13.2551	0.000271837	0.035547	ENSG00000169609	5	2	101	53	82	85	152	41	49	83	23	46	+	+	+	+	+	-	-	+	+	-
chr2	37178539	37179103	-1.02277	2.79439	13.2621	0.000270823	0.035547	ENSG00000115808	5	1	74	105	67	72	76	37	32	34	65	36	+	+	+	+	+	-	-	-	+	-
chr3	109503201	109504035	-0.94306	3.50772	13.2776	0.000268603	0.035547	ENSG00000198919	5	5	107	112	155	152	134	69	71	62	50	104	+	+	+	+	+	+	+	+	+	+
chr18	39204300	39204705	-1.12625	2.77048	13.2533	0.000272097	0.035547	ENSG00000267313	4	2	75	61	54	78	106	59	32	69	22	59	-	+	+	+	+	+	-	+	-	-
chr7	101502321	101502946	-0.998393	3.11554	13.259	0.000271275	0.035547	ENSG00000257923	4	5	73	82	73	191	62	141	48	69	30	68	-	+	+	+	+	+	+	+	+	+
chr6	140364408	140365467	-0.619602	5.43109	13.2596	0.000271189	0.035547	ENSG00000164442	5	5	359	360	333	550	588	521	260	348	307	397	+	+	+	+	+	+	+	+	+	+
chr18	31401219	31402004	-0.817149	4.37899	13.2385	0.000274263	0.0356962	ENSG00000141431	5	5	154	185	226	283	299	184	133	141	106	191	+	+	+	+	+	+	+	+	+	+
chr4	187125256	187126103	0.961933	3.54926	13.2315	0.000275283	0.0356962	ENSG00000164344	3	4	131	72	90	40	40	197	65	133	159	163	+	+	+	-	-	+	-	+	+	+
chr7	105161859	105163222	0.587821	6.04422	13.2317	0.000275251	0.0356962	ENSG00000091127	5	5	432	330	367	984	317	1061	652	881	655	891	+	+	+	+	+	+	+	+	+	+
chr4	83421082	83422433	-0.951168	3.67535	13.2024	0.000279594	0.0361656	ENSG00000249242	3	4	131	62	80	235	166	221	51	77	68	152	+	-	-	+	+	+	-	+	+	+
chr5	127418468	127420322	0.543881	7.42601	13.1852	0.000282163	0.0363058	ENSG00000064651	5	5	1094	1025	983	2399	850	2820	1775	1971	1530	2684	+	+	+	+	+	+	+	+	+	+
chr9	66489712	66489931	1.0639	3.21573	13.1813	0.000282757	0.0363058	ENSG00000238113	0	3	61	66	29	33	38	272	94	140	57	128	-	-	-	-	-	+	+	+	-	-
chr5	142936714	142937242	-1.24611	2.40864	13.1837	0.00028239	0.0363058	ENSG00000113580	3	0	42	54	66	77	64	56	22	47	16	35	-	-	+	+	+	-	-	-	-	-
chr1	65210017	65211173	0.63785	5.16653	13.1693	0.000284577	0.0364502	ENSG00000162437	5	5	225	201	185	521	170	498	455	433	268	603	+	+	+	+	+	+	+	+	+	+
chr2	48448923	48449402	-0.987365	3.12082	13.1482	0.000287798	0.0364674	ENSG00000170802	5	5	100	69	117	105	108	70	44	48	51	61	+	+	+	+	+	+	+	+	+	+
chr2	98583060	98583702	-1.05546	3.09203	13.1476	0.000287892	0.0364674	ENSG00000075568	5	2	87	103	132	90	84	51	42	66	27	67	+	+	+	+	+	-	-	+	-	+
chr4	10117550	10118997	0.571903	6.78631	13.1497	0.000287559	0.0364674	ENSG00000071127	5	5	849	734	723	1361	461	1575	1236	1484	922	1424	+	+	+	+	+	+	+	+	+	+
chr6	71997767	71999221	0.577831	6.83105	13.1456	0.000288192	0.0364674	ENSG00000119900	5	5	651	696	523	1542	637	1737	1127	1499	1069	1857	+	+	+	+	+	+	+	+	+	+
chr3	42218172	42218509	-1.02351	2.82167	13.1499	0.000287527	0.0364674	ENSG00000182606	4	3	68	75	64	104	89	47	28	52	48	60	+	+	-	+	+	-	-	+	+	+
chr4	124271345	124271646	-1.07532	2.97246	13.1405	0.000288979	0.0364789	ENSG00000164056	4	2	56	73	54	158	105	72	34	67	76	27	+	+	-	+	+	-	-	+	+	-
chr7	19780863	19781450	-1.15647	3.04014	13.1307	0.000290502	0.036583	ENSG00000173452	5	3	61	109	108	77	109	78	26	55	41	62	+	+	+	+	+	+	-	+	-	+
chr2	15044598	15044829	-1.69067	1.83039	13.1094	0.000293824	0.0366918	ENSG00000162981	3	0	20	95	44	48	21	22	14	7	11	21	-	+	+	-	+	-	-	-	-	-
chr18	32094249	32094669	-0.928526	3.8698	13.1082	0.000294006	0.0366918	ENSG00000134769	5	5	108	147	146	207	181	148	94	148	41	136	+	+	+	+	+	+	+	+	+	+
chr6	7909836	7911546	0.612921	5.60185	13.1072	0.000294168	0.0366918	ENSG00000239264	5	5	390	259	291	693	191	715	603	627	377	641	+	+	+	+	+	+	+	+	+	+
chr12	65003708	65005319	0.606667	5.65034	13.1197	0.000292208	0.0366918	ENSG00000153179	5	5	382	324	328	603	222	720	709	546	371	666	+	+	+	+	+	+	+	+	+	+
chr9	23821223	23822024	0.884712	3.64483	13.1022	0.000294956	0.0367028	ENSG00000176399	0	4	60	75	60	142	57	190	170	131	100	235	-	-	-	-	-	+	+	+	-	+
chr1	95391746	95393265	0.763891	6.15682	13.0946	0.000296146	0.0367635	ENSG00000117519	5	5	505	474	507	770	230	1099	704	1181	701	771	+	+	+	+	+	+	+	+	+	+
chr5	125705962	125707409	-0.660044	5.25104	13.071	0.000299896	0.0369005	ENSG00000155324	5	5	297	328	327	725	335	520	205	335	300	285	+	+	+	+	+	+	+	+	+	+
chr1	16950279	16950834	-1.03294	3.1893	13.0659	0.000300721	0.0369005	ENSG00000219481	3	2	101	68	148	161	65	50	95	73	13	51	-	-	+	+	+	-	+	+	-	-
chr2	225747179	225747725	-0.937899	3.17683	13.073	0.00029958	0.0369005	ENSG00000135905	4	5	100	64	54	164	118	104	53	63	57	68	+	+	-	+	+	+	+	+	+	+
chr8	57123667	57124898	0.570527	7.40641	13.0656	0.000300772	0.0369005	ENSG00000170791	5	5	1134	1097	1058	2206	816	2051	1715	2328	1433	2812	+	+	+	+	+	+	+	+	+	+
chr11	82422334	82422887	1.376	2.3358	13.0818	0.000298178	0.0369005	ENSG00000137509	0	3	28	6	27	41	21	123	66	25	38	116	-	-	-	-	-	+	-	-	+	+
chr7	143533427	143534618	0.708181	5.77571	13.0588	0.000301863	0.0369479	ENSG00000253882	5	5	189	289	279	958	267	900	588	577	619	851	+	+	+	+	+	+	+	+	+	+
chr8	15646146	15646984	-0.758773	4.42479	13.0439	0.000304281	0.037157	ENSG00000104723	5	5	148	227	185	325	256	218	103	175	164	191	+	+	+	+	+	+	+	+	+	+
chr2	170364016	170364668	-0.841749	4.20631	13.0318	0.000306247	0.0372386	ENSG00000239474	5	5	140	121	112	313	285	251	102	168	81	201	+	+	+	+	+	+	+	+	+	+
chr12	24375864	24376266	-0.965397	3.49742	13.031	0.000306371	0.0372386	ENSG00000134532	5	5	66	145	70	219	136	117	71	57	97	67	+	+	+	+	+	+	+	+	+	+
chr3	158506247	158506578	-1.33292	2.10146	13.0214	0.000307953	0.037258	ENSG00000118849	2	2	22	60	29	83	54	40	22	26	9	47	-	+	-	+	-	-	-	+	-	+
chr7	113277002	113277450	-1.02054	2.69533	13.0229	0.000307706	0.037258	ENSG00000128573	3	2	58	69	56	96	86	47	35	53	30	54	-	+	-	+	+	-	-	+	-	+
chr21	38459380	38459784	-1.08782	2.69375	13.0136	0.000309229	0.0373263	ENSG00000182670	4	2	50	79	74	100	66	53	39	52	17	56	+	+	-	+	+	-	-	+	-	+
chr12	8395110	8396699	0.562358	7.58333	12.9868	0.000313698	0.0377214	ENSG00000215241	5	5	1547	1269	1412	2143	847	2581	1760	2302	2106	2477	+	+	+	+	+	+	+	+	+	+
chr6	125269162	125269602	-1.08148	2.55209	12.9853	0.000313943	0.0377214	ENSG00000146373	3	2	52	86	43	97	61	39	43	34	20	53	-	+	-	+	+	+	+	-	-	-
chr21	46493986	46495346	0.704749	4.60782	12.971	0.000316355	0.0378416	ENSG00000197381	5	5	209	135	173	305	95	206	391	294	164	349	+	+	+	+	+	+	+	+	+	+
chr12	95037871	95038709	-0.915604	3.34669	12.9708	0.000316388	0.0378416	ENSG00000057704	4	3	105	98	100	161	95	127	60	69	44	87	+	+	+	+	-	+	+	+	-	-
chr10	84001154	84001622	-1.42651	2.82474	12.9525	0.0003195	0.0381268	ENSG00000108219	5	3	80	43	79	86	117	90	35	50	13	51	+	+	+	+	+	+	-	+	-	+
chr8	107281894	107282923	0.56055	6.73053	12.9393	0.00032175	0.0382459	ENSG00000164830	5	5	690	759	648	1267	542	1438	1141	1228	961	1672	+	+	+	+	+	+	+	+	+	+
chr7	82305997	82306776	-1.08567	3.2817	12.9381	0.000321959	0.0382459	ENSG00000153956	4	4	61	126	103	119	151	69	56	56	34	93	-	+	+	+	+	+	+	+	-	+
chr2	131792170	131792958	0.884575	3.86851	12.9297	0.000323414	0.0383318	ENSG00000152102	3	5	87	67	34	171	81	224	162	195	151	268	-	+	-	+	+	+	+	+	+	+
chr3	177194311	177194708	-1.03534	2.63764	12.9047	0.000327766	0.03876	ENSG00000177565	3	3	59	53	48	100	81	59	20	35	56	55	-	+	-	+	+	+	-	-	+	+
chr3	42141348	42141571	-1.19398	2.13382	12.8986	0.00032882	0.0387971	ENSG00000182606	3	1	45	50	39	75	44	50	28	25	19	20	-	+	-	+	+	+	-	-	-	-
chr4	151439778	151440103	-1.05112	2.48059	12.8897	0.000330395	0.0388952	ENSG00000170390	4	0	70	52	66	100	44	42	31	25	26	48	+	-	+	+	+	-	-	-	-	-
chr4	105736751	105737158	-1.15692	2.52463	12.8719	0.000333545	0.0391781	ENSG00000168772	3	4	42	56	72	142	46	44	28	35	40	23	-	+	+	+	-	+	+	+	+	-
chr20	13864164	13864432	1.55853	1.99752	12.8498	0.000337507	0.0392123	ENSG00000101247	0	3	13	2	14	20	18	96	30	99	21	76	-	-	-	-	-	+	-	+	-	+
chr13	52255228	52255845	-0.761164	4.45706	12.8622	0.000335293	0.0392123	ENSG00000139668	5	5	196	185	190	297	300	225	124	156	130	231	+	+	+	+	+	+	+	+	+	+
chr8	118169069	118169496	-0.914333	3.38824	12.8504	0.000337413	0.0392123	ENSG00000164756	5	1	86	110	84	177	108	144	58	67	50	102	+	+	+	+	+	-	-	-	-	+
chr19	14200934	14202451	0.704031	5.11089	12.8545	0.00033666	0.0392123	ENSG00000141858	4	5	421	267	298	320	82	190	524	446	195	445	+	+	+	+	-	+	+	+	+	+
chr1	142854487	142855653	-0.897345	3.85172	12.8494	0.000337579	0.0392123	ENSG00000196369	5	5	213	141	242	142	107	75	98	78	38	131	+	+	+	+	+	+	+	+	+	+
chr7	106684574	106685730	0.623924	5.69255	12.8349	0.000340215	0.0394044	ENSG00000005249	5	5	269	328	238	709	286	724	545	670	507	834	+	+	+	+	+	+	+	+	+	+
chr4	169045311	169045853	-0.947856	2.99584	12.8279	0.000341489	0.0394044	ENSG00000109511	5	3	82	67	94	157	69	59	49	55	32	72	+	+	+	+	+	+	-	+	-	+
chr5	25056732	25057367	1.08989	2.46649	12.8306	0.000341003	0.0394044	ENSG00000040731	0	3	20	24	17	45	31	88	49	38	138	57	-	-	-	-	-	+	-	+	+	-
chr16	54962681	54963546	0.628026	5.29732	12.8014	0.00034636	0.0398786	ENSG00000245694	5	5	326	286	415	473	104	259	640	483	198	498	+	+	+	+	+	+	+	+	+	+
chr6	90061870	90063088	0.579755	6.45387	12.7935	0.000347825	0.0399595	ENSG00000198833	5	5	554	510	486	1321	405	1330	928	989	899	1262	+	+	+	+	+	+	+	+	+	+
chr2	53228475	53229180	-1.04195	3.24303	12.7823	0.000349907	0.0401059	ENSG00000143942	4	4	109	89	61	109	129	114	45	75	28	117	+	+	-	+	+	+	+	+	-	+
chr11	64001556	64002635	0.720159	4.81739	12.7785	0.000350631	0.0401059	ENSG00000173511	1	5	217	172	181	364	104	243	381	453	215	377	-	-	-	+	-	+	+	+	+	+
chr1	142839055	142839431	-1.36268	1.67625	12.773	0.000351656	0.0401355	ENSG00000196369	3	0	63	29	57	35	18	16	13	15	7	18	+	-	+	+	-	-	-	-	-	-
chr12	21680194	21681106	0.719308	4.7029	12.7582	0.000354453	0.0403668	ENSG00000134548	5	5	145	109	193	351	122	525	335	212	214	383	+	+	+	+	+	+	+	+	+	+
chr13	42162971	42163352	-0.928491	3.57642	12.7503	0.000355958	0.0404258	ENSG00000102760	5	4	106	114	130	172	141	88	83	112	34	111	+	+	+	+	+	+	+	+	-	+
chr11	91665254	91665945	0.835894	3.80265	12.7473	0.000356514	0.0404258	ENSG00000180773	3	5	72	51	35	148	91	343	167	190	114	193	+	-	-	+	+	+	+	+	+	+
chr1	85930012	85931218	0.567331	6.04656	12.7404	0.000357844	0.0404889	ENSG00000153904	5	5	495	384	351	939	275	1054	715	778	506	1103	+	+	+	+	+	+	+	+	+	+
chr21	16999879	17000555	-0.991125	3.2176	12.735	0.000358874	0.0405179	ENSG00000155313	4	4	73	97	62	153	113	96	26	67	76	101	+	+	-	+	+	+	-	+	+	+
chr8	58476627	58477269	-0.853393	3.72353	12.7079	0.000364113	0.0409118	ENSG00000169122	5	5	113	112	150	219	146	130	74	96	98	74	+	+	+	+	+	+	+	+	+	+
chr6	83614063	83615014	-0.93828	3.25528	12.7109	0.000363531	0.0409118	ENSG00000118420	5	2	72	70	89	159	124	146	44	48	79	60	+	+	+	+	+	+	-	-	+	-
chr11	94276860	94278222	0.521727	6.84487	12.7049	0.000364706	0.0409118	ENSG00000134627	5	5	742	667	651	1467	694	1722	1299	1476	938	1673	+	+	+	+	+	+	+	+	+	+
chr19	22610460	22611256	0.999864	3.0052	12.6947	0.000366699	0.0409123	ENSG00000197360	0	4	62	66	91	55	16	68	124	89	52	106	-	-	-	-	-	+	+	+	-	+
chr1	75018571	75019228	-0.927801	3.87669	12.6929	0.000367052	0.0409123	ENSG00000178965	5	5	93	270	98	201	152	127	86	91	94	113	+	+	+	+	+	+	+	+	+	+
chr13	49948819	49949177	-0.983384	3.13037	12.6978	0.000366088	0.0409123	ENSG00000102547	4	4	84	65	79	147	130	69	59	45	41	82	-	+	+	+	+	+	+	+	-	+
chr6	88875349	88877094	0.690126	4.96567	12.6738	0.000370819	0.041157	ENSG00000135334	5	5	165	208	142	408	153	488	363	326	324	495	+	+	+	+	+	+	+	+	+	+
chr10	67179325	67179650	-1.36929	1.73872	12.6745	0.000370681	0.041157	ENSG00000198739	3	0	28	34	41	47	54	12	17	16	9	30	-	-	+	+	+	-	-	-	-	-
chr4	19709658	19710129	1.10834	2.52155	12.6536	0.000374849	0.0412937	ENSG00000145147	0	5	9	19	23	54	37	103	48	39	156	41	-	-	-	-	-	+	+	+	+	+
chr4	44150162	44150589	-1.25121	2.76712	12.6606	0.000373452	0.0412937	ENSG00000183783	4	3	65	28	38	135	109	90	29	68	15	74	+	-	+	+	+	+	-	+	-	+
chr8	58456596	58457228	-0.941074	3.179	12.6518	0.000375204	0.0412937	ENSG00000169122	5	2	82	75	77	153	103	115	39	84	56	62	+	+	+	+	+	+	-	+	-	-
chr6	91320435	91321407	0.826538	3.96048	12.6536	0.00037484	0.0412937	ENSG00000135341	4	5	100	68	81	186	59	341	189	142	102	297	+	+	+	+	-	+	+	+	+	+
chr4	36364456	36365150	-0.925352	3.07882	12.6466	0.000376253	0.0413224	ENSG00000047365	5	3	71	73	79	183	82	63	87	66	22	62	+	+	+	+	+	-	+	+	-	+
chr6	94128236	94129724	0.606059	6.07679	12.6343	0.000378734	0.0413349	ENSG00000172469	5	5	329	441	347	964	365	1039	814	726	678	954	+	+	+	+	+	+	+	+	+	+
chr2	23607542	23609133	0.606755	5.26047	12.6376	0.000378061	0.0413349	ENSG00000119771	5	5	260	238	215	503	178	516	476	543	298	524	+	+	+	+	+	+	+	+	+	+
chr10	33246329	33247805	0.547052	6.29239	12.6397	0.000377641	0.0413349	ENSG00000150093	5	5	521	544	549	997	371	952	959	1003	607	1095	+	+	+	+	+	+	+	+	+	+
chr7	156802904	156803976	0.72043	5.25576	12.6276	0.000380098	0.0413975	ENSG00000243479	5	5	255	237	230	569	129	397	432	559	350	576	+	+	+	+	+	+	+	+	+	+
chr12	22811207	22811502	-0.843127	3.52521	12.617	0.000382246	0.0414324	ENSG00000139163	5	5	107	114	94	166	149	101	75	86	64	96	+	+	+	+	+	+	+	+	+	+
chr1	156774353	156774808	0.939475	3.01564	12.6166	0.000382328	0.0414324	ENSG00000143321	2	5	32	31	49	85	46	159	89	83	95	111	-	-	-	+	+	+	+	+	+	+
chr6	113953428	113954152	-0.674465	4.82844	12.6144	0.000382791	0.0414324	ENSG00000196591	5	5	223	269	330	416	307	256	206	194	163	247	+	+	+	+	+	+	+	+	+	+
chr5	179740651	179741314	-1.09651	3.34592	12.6099	0.000383711	0.0414463	ENSG00000050748	5	2	137	90	79	170	71	54	62	133	9	150	+	+	+	+	+	-	-	+	-	+
chr10	63664298	63665032	-0.71307	4.66852	12.6005	0.000385648	0.0415699	ENSG00000150347	4	2	236	242	205	329	297	262	114	240	166	274	-	+	+	+	+	+	-	+	-	-
chr7	107724418	107724720	-1.23586	1.67207	12.5938	0.000387018	0.0415929	ENSG00000091136	3	0	36	25	26	53	40	31	12	13	26	19	-	+	-	+	+	-	-	-	-	-
chr6	168256325	168256844	-0.918703	3.25323	12.5918	0.00038745	0.0415929	ENSG00000130396	5	4	90	79	80	146	119	112	44	87	61	64	+	+	+	+	+	+	-	+	+	+
chr2	83282599	83282969	-1.18822	2.29415	12.5722	0.000391518	0.0419437	ENSG00000163541	5	1	47	46	55	55	81	35	22	28	21	40	+	+	+	+	+	-	-	-	-	+
chr11	92674962	92675574	-1.11988	2.50616	12.5441	0.000397464	0.0421555	ENSG00000180773	2	3	45	60	32	123	46	102	25	28	21	64	-	+	-	+	-	+	-	+	-	+
chr19	39137938	39138538	0.660888	5.02152	12.544	0.000397486	0.0421555	ENSG00000130402	5	5	224	226	238	399	115	199	597	548	154	377	+	+	+	+	+	+	+	+	+	+
chr5	131705042	131706069	0.584517	5.47073	12.5535	0.000395463	0.0421555	ENSG00000197375	5	5	322	265	263	589	211	567	536	583	360	632	+	+	+	+	+	+	+	+	+	+
chr11	32112260	32113561	0.56599	5.53605	12.5438	0.000397519	0.0421555	ENSG00000007372	5	5	295	262	232	614	245	803	481	588	396	707	+	+	+	+	+	+	+	+	+	+
chr4	42000825	42001510	-1.12492	2.776	12.5577	0.000394575	0.0421555	ENSG00000014824	4	2	48	56	103	146	66	53	29	21	35	73	-	+	+	+	+	-	-	-	+	+
chr20	15119280	15119904	-0.879421	3.99332	12.5265	0.000401226	0.0423439	ENSG00000125848	5	4	81	166	110	244	225	190	50	125	172	114	+	+	+	+	+	+	-	+	+	+
chr10	73723943	73725110	0.895502	3.47832	12.5303	0.000400416	0.0423439	ENSG00000122863	1	5	87	64	66	120	37	123	174	161	91	131	-	-	-	+	-	+	+	+	+	+
chr21	41794827	41795445	-0.930817	3.67434	12.5242	0.00040172	0.0423439	ENSG00000171587	5	4	74	93	97	184	256	130	59	95	79	108	+	+	+	+	+	+	-	+	+	+
chr9	28810228	28810992	-0.776911	4.0961	12.5082	0.000405175	0.0426223	ENSG00000174482	5	5	152	143	190	264	178	210	96	104	125	123	+	+	+	+	+	+	+	+	+	+
chr12	40457308	40457993	-0.786285	4.0486	12.5038	0.000406135	0.0426377	ENSG00000151229	5	5	158	139	152	259	190	173	93	97	102	178	+	+	+	+	+	+	+	+	+	+
chr4	82342689	82343025	-1.22629	2.18604	12.4903	0.000409072	0.0428601	ENSG00000138670	3	0	44	45	58	78	41	39	37	31	6	30	-	+	+	+	-	-	-	-	-	-
chr4	100631989	100632511	-0.909242	3.24362	12.4771	0.000411969	0.0429776	ENSG00000070190	4	1	110	68	131	157	100	42	71	54	45	71	-	+	+	+	+	-	+	-	-	-
chr10	89691553	89692148	-1.08877	3.15395	12.4666	0.000414296	0.0429776	ENSG00000227268	5	2	85	83	107	101	135	54	38	64	35	90	+	+	+	+	+	-	-	+	-	+
chr12	122687778	122688958	0.778818	4.00533	12.4674	0.000414126	0.0429776	ENSG00000176383	4	5	118	121	111	147	55	187	175	246	126	244	+	+	+	+	-	+	+	+	+	+
chr4	147232245	147233030	0.784271	4.23558	12.4767	0.000412067	0.0429776	ENSG00000164167	3	5	45	65	44	188	129	576	103	125	431	172	-	+	-	+	+	+	+	+	+	+
chr4	108929903	108930352	-1.00456	3.4368	12.4668	0.000414248	0.0429776	ENSG00000138796	4	3	74	87	150	182	137	82	67	94	34	85	-	+	+	+	+	+	-	+	-	+
chr6	144736199	144736533	-0.802065	3.80071	12.4586	0.000416074	0.0430768	ENSG00000152818	5	4	98	159	115	206	178	132	94	102	103	83	+	+	+	+	+	+	+	+	+	-
chr11	63580453	63581652	0.684462	4.60504	12.4533	0.000417245	0.0431129	ENSG00000168005	5	5	192	167	215	249	88	210	368	366	145	288	+	+	+	+	+	+	+	+	+	+
chr10	11783884	11785049	0.627047	5.05239	12.4379	0.000420715	0.0433565	ENSG00000134463	5	5	250	158	198	449	158	481	376	449	289	450	+	+	+	+	+	+	+	+	+	+
chr7	109504242	109504636	0.996089	3.18307	12.4318	0.000422086	0.0433565	ENSG00000173114	3	5	49	29	25	54	71	254	94	93	100	124	+	-	-	+	+	+	+	+	+	+
chr7	65337762	65339043	0.573516	6.09926	12.4337	0.000421656	0.0433565	ENSG00000196715	5	5	515	448	432	939	302	729	931	881	527	931	+	+	+	+	+	+	+	+	+	+
chr13	80614683	80615170	-0.747308	4.39206	12.4258	0.000423435	0.04341	ENSG00000136158	5	5	213	206	241	232	264	141	168	133	101	174	+	+	+	+	+	+	+	+	+	+
chr1	101004555	101005747	0.746131	4.29013	12.405	0.000428192	0.0438119	ENSG00000162692	4	5	149	88	98	214	113	278	285	222	161	284	+	+	-	+	+	+	+	+	+	+
chr7	17598491	17599413	-0.76571	4.12239	12.387	0.000432337	0.0441047	ENSG00000236039	4	5	107	185	145	282	222	169	101	124	143	129	-	+	+	+	+	+	+	+	+	+
chr6	123017693	123018398	-0.642344	5.02611	12.3853	0.000432737	0.0441047	ENSG00000172594	5	5	289	272	370	623	268	249	339	294	145	191	+	+	+	+	+	+	+	+	+	+
chr1	29111767	29112170	-1.21962	1.99174	12.3803	0.00043389	0.0441363	ENSG00000116329	2	2	65	32	27	65	35	46	20	31	13	26	+	-	-	+	-	+	-	+	-	-
chr6	83968302	83968550	-1.28698	1.78724	12.3733	0.00043552	0.0442162	ENSG00000013375	3	1	28	42	27	46	55	13	9	20	39	16	-	+	-	+	+	-	-	-	+	-
chr4	71620898	71621388	-1.09524	2.44173	12.3677	0.00043682	0.0442624	ENSG00000018189	4	2	57	39	62	79	78	41	26	31	28	44	+	-	+	+	+	+	-	-	-	+
chr3	73589949	73590589	-1.02977	2.54266	12.3535	0.000440171	0.0445159	ENSG00000121440	3	2	44	41	33	112	70	103	17	30	52	50	+	+	-	+	-	+	-	-	-	+
chr10	11059334	11060681	0.700608	4.80402	12.3381	0.000443799	0.0446244	ENSG00000048740	5	5	144	165	109	442	124	375	366	390	208	465	+	+	+	+	+	+	+	+	+	+
chr4	9533658	9534767	0.642124	4.90698	12.3414	0.000443034	0.0446244	ENSG00000109667	5	5	182	157	168	389	143	585	297	343	330	376	+	+	+	+	+	+	+	+	+	+
chr2	184108842	184109756	0.760764	4.86159	12.3452	0.000442126	0.0446244	ENSG00000163002	4	5	113	105	86	394	216	774	353	193	335	388	+	+	-	+	+	+	+	+	+	+
chr2	3184281	3184934	-0.953524	3.41029	12.3344	0.000444683	0.0446276	ENSG00000032389	5	3	171	84	129	156	76	104	76	59	31	84	+	+	+	+	+	+	+	-	-	+
chr1	114895405	114896168	0.907275	3.44385	12.3102	0.000450493	0.0451242	ENSG00000197323	2	5	67	55	68	71	50	245	89	149	107	159	-	+	+	-	-	+	+	+	+	+
chr3	45267059	45268110	0.691052	4.63346	12.2922	0.000454866	0.0454754	ENSG00000249992	5	5	178	155	150	281	126	187	395	381	173	327	+	+	+	+	+	+	+	+	+	+
chr10	123357468	123358378	0.771208	4.52138	12.2881	0.000455848	0.0454867	ENSG00000066468	5	5	181	114	142	272	91	313	230	318	292	253	+	+	+	+	+	+	+	+	+	+
chr11	86665881	86667383	0.533236	6.66626	12.2829	0.000457139	0.0455287	ENSG00000174804	5	5	703	636	666	1362	506	1266	1130	1287	850	1515	+	+	+	+	+	+	+	+	+	+
chr4	25863906	25864894	0.653545	4.86751	12.2549	0.000464027	0.0460397	ENSG00000250317	5	5	245	162	200	401	115	284	430	328	217	423	+	+	+	+	+	+	+	+	+	+
chr5	57389854	57390167	-1.00814	2.60475	12.2573	0.000463434	0.0460397	ENSG00000145632	5	5	65	50	47	103	69	76	36	43	25	49	+	+	+	+	+	+	+	+	+	+
chr7	90419834	90420355	0.984203	3.18904	12.2499	0.000465287	0.0460775	ENSG00000058091	1	4	20	20	13	100	43	308	37	58	227	87	-	-	-	+	-	+	-	+	+	+
chr5	13306466	13307020	-0.906316	4.03229	12.2458	0.000466318	0.0460925	ENSG00000039139	5	5	143	159	195	157	267	98	89	108	81	147	+	+	+	+	+	+	+	+	+	+
chr14	56269762	56270163	-0.94238	3.11591	12.2387	0.000468085	0.0461799	ENSG00000186615	5	1	103	105	94	119	76	65	79	51	30	52	+	+	+	+	+	-	+	-	-	-
chr18	68360204	68360871	0.876225	3.71991	12.2067	0.000476175	0.0462189	ENSG00000170677	2	5	63	39	42	88	139	274	115	107	219	177	-	-	-	+	+	+	+	+	+	+
chr14	93581211	93582767	0.571504	6.18078	12.1332	0.00049533	0.0462189	ENSG00000100605	5	5	646	399	505	916	320	688	908	1080	468	1091	+	+	+	+	+	+	+	+	+	+
chr1	228135216	228135962	0.769959	4.13287	12.1627	0.000487537	0.0462189	ENSG00000143816	1	4	139	105	142	200	59	143	291	260	117	193	-	-	+	-	-	+	+	+	-	+
chr18	29077488	29078666	0.539497	6.3271	12.2092	0.000475554	0.0462189	ENSG00000046604	5	5	446	446	476	1178	429	1367	828	872	733	1242	+	+	+	+	+	+	+	+	+	+
chr11	18690138	18690336	1.45855	2.44799	12.1354	0.000494747	0.0462189	ENSG00000151117	0	3	20	7	22	24	42	83	35	130	90	57	-	-	-	-	-	+	-	+	+	-
chr10	135186639	135187306	0.673219	4.88425	12.1867	0.000481316	0.0462189	ENSG00000127884	5	5	211	198	256	364	107	256	361	414	241	398	+	+	+	+	+	+	+	+	+	+
chr3	188061701	188062222	-1.10792	2.6098	12.1354	0.000494727	0.0462189	ENSG00000145012	5	1	69	56	72	83	79	49	51	21	21	40	+	+	+	+	+	+	-	-	-	-
chr17	165070	165644	-1.19003	2.28507	12.1587	0.000488593	0.0462189	ENSG00000181031	3	0	102	35	65	59	39	18	27	30	14	34	+	-	+	-	+	-	-	-	-	-
chr19	7990419	7991350	0.856749	3.61829	12.214	0.000474324	0.0462189	ENSG00000178531	1	3	98	90	114	101	40	61	183	191	74	178	-	-	+	-	-	-	+	+	-	+
chr1	142917143	142917705	-1.11096	2.75369	12.1513	0.000490528	0.0462189	ENSG00000196369	4	3	129	57	100	77	49	40	49	22	16	50	+	+	+	+	-	+	+	-	-	+
chr7	116772593	116773030	-0.998899	2.66877	12.1639	0.000487233	0.0462189	ENSG00000227199	2	2	59	53	81	126	58	53	48	42	24	37	-	-	+	+	-	-	+	+	-	-
chr9	4289761	4290771	-0.682773	4.61142	12.2268	0.000471085	0.0462189	ENSG00000107249	5	5	199	159	127	409	338	390	131	193	172	247	+	+	+	+	+	+	+	+	+	+
chr6	153413556	153414180	-0.698203	4.39524	12.2069	0.00047614	0.0462189	ENSG00000091844	5	5	160	186	118	373	218	336	93	178	166	211	+	+	+	+	+	+	+	+	+	+
chr6	102000355	102000695	1.05168	2.32868	12.1716	0.00048523	0.0462189	ENSG00000164418	0	3	29	20	33	40	25	79	61	49	57	74	-	-	-	-	-	+	+	-	-	+
chr8	49426754	49427879	0.526201	6.24598	12.2187	0.000473122	0.0462189	ENSG00000019549	5	5	550	410	583	921	399	1156	743	880	708	1051	+	+	+	+	+	+	+	+	+	+
chr14	31077614	31078324	-0.749954	4.19803	12.1602	0.000488198	0.0462189	ENSG00000092108	5	5	199	178	145	307	169	167	107	172	132	128	+	+	+	+	+	+	+	+	+	+
chr14	42609897	42611067	-0.679196	4.53815	12.1313	0.00049583	0.0462189	ENSG00000165379	5	5	213	389	216	144	290	134	155	171	144	142	+	+	+	+	+	+	+	+	+	+
chr10	49514235	49515404	0.541347	6.79487	12.1731	0.000484825	0.0462189	ENSG00000107643	5	5	722	744	739	1326	606	1355	1205	1643	977	1430	+	+	+	+	+	+	+	+	+	+
chr3	101567773	101569051	0.549368	7.01759	12.1822	0.00048248	0.0462189	ENSG00000144802	5	5	876	787	751	1958	582	1763	1459	1597	1099	1955	+	+	+	+	+	+	+	+	+	+
chr13	20531513	20533595	0.542453	7.31044	12.1553	0.000489481	0.0462189	ENSG00000121741	5	5	1219	1002	978	1939	833	1806	1716	2248	1404	2235	+	+	+	+	+	+	+	+	+	+
chr12	48744025	48745287	0.55616	6.14975	12.1415	0.000493125	0.0462189	ENSG00000167528	5	5	483	501	474	891	309	963	786	961	579	974	+	+	+	+	+	+	+	+	+	+
chr4	138188124	138188534	-1.22661	1.72805	12.1376	0.000494162	0.0462189	ENSG00000189184	3	0	38	32	47	43	38	19	15	13	16	24	+	-	+	+	-	-	-	-	-	-
chr8	124642572	124643024	-0.916538	3.4154	12.1871	0.0004812	0.0462189	ENSG00000156804	5	4	92	104	91	174	124	106	106	81	26	84	+	+	+	+	+	+	+	+	-	+
chr8	48100161	48101030	0.651093	4.74102	12.1592	0.000488453	0.0462189	ENSG00000164808	5	5	185	130	134	360	115	513	246	327	270	389	+	+	+	+	+	+	+	+	+	+
chr8	6506376	6507140	-0.58844	5.68235	12.2179	0.000473335	0.0462189	ENSG00000155189	5	5	629	657	470	388	526	313	345	567	266	379	+	+	+	+	+	+	+	+	+	+
chr8	73818818	73819333	-0.885452	3.46801	12.1456	0.000492032	0.0462189	ENSG00000147601	5	5	108	53	84	233	139	157	64	69	63	92	+	+	+	+	+	+	+	+	+	+
chr3	156839945	156840190	-0.99055	2.82772	12.1811	0.000482767	0.0462189	ENSG00000163660	3	0	71	72	63	144	65	63	53	46	42	32	-	+	-	+	+	-	-	-	-	-
chr21	9729417	9729814	-1.32971	1.74835	12.2189	0.000473069	0.0462189	ENSG00000188681	5	0	43	28	47	49	36	27	25	16	8	13	+	+	+	+	+	-	-	-	-	-
chr12	105252812	105253311	-0.895463	3.04334	12.1784	0.000483467	0.0462189	ENSG00000136052	5	5	74	86	80	120	103	61	50	46	63	55	+	+	+	+	+	+	+	+	+	+
chr9	68501282	68502025	-0.904656	3.63498	12.1897	0.00048054	0.0462189	ENSG00000170161	5	5	149	141	129	131	137	103	92	78	39	114	+	+	+	+	+	+	+	+	+	+
chr18	7566563	7568685	0.533567	6.31254	12.1863	0.000481421	0.0462189	ENSG00000173482	5	5	554	417	595	1248	342	1055	1006	1011	564	1039	+	+	+	+	+	+	+	+	+	+
chr20	14098321	14098787	-1.1197	2.22942	12.1208	0.000498616	0.0462963	ENSG00000172264	4	1	42	40	49	70	65	43	19	27	26	39	-	+	+	+	+	+	-	-	-	-
chr21	17101816	17103147	0.541866	6.92289	12.1182	0.000499311	0.0462963	ENSG00000155313	5	5	878	667	682	1793	618	1433	1633	1552	821	1886	+	+	+	+	+	+	+	+	+	+
chr11	110582382	110584053	0.624305	5.03975	12.1192	0.000499059	0.0462963	ENSG00000137714	5	5	191	160	153	497	171	535	336	451	322	466	+	+	+	+	+	+	+	+	+	+
chr21	10138507	10141617	-1.02876	5.6396	12.112	0.000500983	0.0463692	ENSG00000188681	5	5	584	368	729	626	548	461	292	285	146	513	+	+	+	+	+	+	+	+	+	+
chr1	98519252	98520110	0.642104	4.793	12.0931	0.000506079	0.0467583	ENSG00000188641	5	5	175	190	185	312	129	380	291	334	267	414	+	+	+	+	+	+	+	+	+	+
chr9	97794778	97795285	-1.0085	2.75788	12.0885	0.000507344	0.0467927	ENSG00000158169	3	0	73	77	89	106	48	63	41	40	25	49	-	+	+	+	-	-	-	-	-	-
chr1	142829502	142830093	-1.19603	2.36026	12.0817	0.000509205	0.0468565	ENSG00000196369	3	1	80	35	64	78	48	43	32	21	11	49	-	-	+	+	+	+	-	-	-	-
chr4	153602166	153602739	-0.686173	4.66695	12.0794	0.000509825	0.0468565	ENSG00000164144	5	5	194	299	178	290	339	298	154	175	171	237	+	+	+	+	+	+	+	+	+	+
chr10	52634391	52634936	-0.781658	3.86664	12.0742	0.00051125	0.0469052	ENSG00000148584	5	5	126	109	122	274	168	159	83	112	123	90	+	+	+	+	+	+	+	+	+	+
chr3	17520172	17520633	-0.779737	3.96148	12.0544	0.000516705	0.0471199	ENSG00000154822	5	5	116	113	201	293	185	103	119	84	89	129	+	+	+	+	+	+	+	+	+	+
chr6	170578548	170579003	0.952405	3.15252	12.0553	0.000516459	0.0471199	ENSG00000198719	1	5	37	31	40	66	64	231	94	108	106	89	-	-	-	-	+	+	+	+	+	+
chr9	79432403	79432749	-0.823197	3.53676	12.0527	0.000517165	0.0471199	ENSG00000106772	5	3	124	140	85	160	108	118	79	118	49	87	+	+	+	+	+	+	+	+	-	-
chr5	102159022	102159624	-1.05165	2.44654	12.0526	0.000517189	0.0471199	ENSG00000145730	2	2	50	57	49	90	61	63	35	28	25	38	-	+	-	+	-	+	-	-	+	-
chr5	91970431	91971049	0.784198	4.27927	12.0456	0.000519159	0.0471355	ENSG00000175745	5	5	136	122	64	107	172	331	244	213	244	193	+	+	+	+	+	+	+	+	+	+
chr5	63985982	63987026	0.589059	5.49258	12.0474	0.000518637	0.0471355	ENSG00000145642	5	5	278	239	194	557	253	957	420	426	446	760	+	+	+	+	+	+	+	+	+	+
chr9	3968938	3969260	-1.06109	2.75282	12.0319	0.00052299	0.0471564	ENSG00000107249	5	1	69	46	110	102	78	45	56	37	22	33	+	+	+	+	+	-	+	-	-	-
chr2	48511802	48512522	-0.979216	3.1471	12.0321	0.000522928	0.0471564	ENSG00000170802	5	2	106	74	90	137	84	91	50	56	25	109	+	+	+	+	+	+	-	-	-	+
chr11	6608799	6609126	1.09915	2.52691	12.0347	0.00052219	0.0471564	ENSG00000132275	0	4	31	24	16	39	29	143	88	74	34	81	-	-	-	-	-	+	+	+	-	+
chr22	39096549	39097361	0.671789	5.16911	12.0327	0.000522755	0.0471564	ENSG00000100221	4	5	302	268	311	463	87	273	480	501	220	521	+	+	+	+	-	+	+	+	+	+
chr7	105752181	105753207	0.528379	6.29038	12.0278	0.000524133	0.0471783	ENSG00000008282	5	5	546	432	487	1151	386	1118	887	929	673	1110	+	+	+	+	+	+	+	+	+	+
chr7	81819377	81819781	-0.972136	2.73019	12.0079	0.000529755	0.0476025	ENSG00000153956	3	0	63	50	75	117	76	58	32	28	47	58	-	-	+	+	+	-	-	-	-	-
chr12	68221621	68222208	-0.892523	3.50992	11.9984	0.000532461	0.047751	ENSG00000127334	5	4	107	116	105	129	157	121	66	77	54	102	+	+	+	+	+	+	+	+	-	+
chr8	144635346	144636239	0.866036	3.74749	11.9949	0.000533476	0.047751	ENSG00000104518	3	5	85	53	148	178	42	154	170	184	107	160	+	-	+	+	-	+	+	+	+	+
chr18	40883213	40883801	-0.952529	3.1865	11.9925	0.000534142	0.047751	ENSG00000132872	5	4	89	115	79	90	119	91	45	56	42	91	+	+	+	+	+	+	-	+	+	+
chr12	90019444	90019703	-1.08528	2.36187	11.9848	0.000536375	0.047869	ENSG00000070961	2	2	32	34	22	120	68	77	18	58	23	41	-	-	-	+	+	+	-	+	-	-
chr11	12131751	12132714	0.558786	5.5711	11.9811	0.000537421	0.0478808	ENSG00000133816	5	5	347	274	304	588	255	579	572	687	371	635	+	+	+	+	+	+	+	+	+	+
chr1	159915354	159916055	0.725543	4.08336	11.9638	0.000542442	0.0481894	ENSG00000085552	5	5	152	102	152	155	74	164	228	164	158	224	+	+	+	+	+	+	+	+	+	+
chr6	126862942	126863473	-1.03512	2.49847	11.9628	0.000542725	0.0481894	ENSG00000203760	5	2	55	58	56	70	87	32	34	28	31	45	+	+	+	+	+	-	-	-	+	+
chr7	100643253	100643913	-1.07101	2.56352	11.9523	0.000545811	0.0483813	ENSG00000169871	5	2	105	47	72	86	49	24	43	26	18	52	+	+	+	+	+	-	+	-	-	+
chr1	224690623	224691633	0.673751	4.76435	11.9236	0.000554264	0.0490477	ENSG00000162923	5	5	186	140	155	338	129	407	326	443	228	307	+	+	+	+	+	+	+	+	+	+
chr2	86849717	86851155	0.54558	5.91067	11.9172	0.000556187	0.0491349	ENSG00000239305	5	5	430	358	368	872	240	903	632	777	436	974	+	+	+	+	+	+	+	+	+	+
chr18	34833422	34834856	0.516391	6.39181	11.9105	0.000558197	0.0492294	ENSG00000101489	5	5	587	513	463	995	484	1364	822	959	807	1258	+	+	+	+	+	+	+	+	+	+
chr6	127903998	127904472	-0.954542	2.85448	11.9043	0.000560046	0.0492709	ENSG00000255330	3	3	54	61	53	139	111	46	57	51	32	59	-	+	-	+	+	-	+	+	-	+
chr9	66464833	66465292	-0.988452	3.77434	11.9026	0.000560548	0.0492709	ENSG00000238113	5	4	188	116	189	136	150	113	72	58	50	149	+	+	+	+	+	+	-	+	+	+
chr4	176635732	176636084	-1.60375	2.13027	11.8945	0.000562997	0.0494032	ENSG00000150625	4	1	18	46	52	88	69	31	11	16	13	52	-	+	+	+	+	-	-	-	-	+
chr4	56914724	56916113	0.571144	5.5888	11.8909	0.000564095	0.0494168	ENSG00000174799	5	5	289	255	223	657	313	708	529	555	478	736	+	+	+	+	+	+	+	+	+	+
chr21	9938683	9939124	-1.15502	2.28176	11.8841	0.000566139	0.0495131	ENSG00000188681	2	3	75	46	66	56	43	35	31	30	11	33	-	-	+	-	+	-	+	+	-	+
chr19	12900554	12901238	0.641757	5.13133	11.8668	0.000571434	0.0495624	ENSG00000171223	2	5	285	239	251	408	142	310	463	519	285	422	-	-	-	+	+	+	+	+	+	+
chr14	32406952	32407415	-0.707231	4.61044	11.8768	0.000568386	0.0495624	ENSG00000100852	5	5	292	206	276	289	250	220	158	219	129	182	+	+	+	+	+	+	+	+	+	+
chr1	92048157	92049097	-0.826815	3.8326	11.8692	0.0005707	0.0495624	ENSG00000097046	4	2	149	109	168	273	98	175	81	86	50	170	+	+	+	+	-	+	-	-	-	+
chr4	178997267	178997545	-1.23625	1.94834	11.8699	0.000570488	0.0495624	ENSG00000251504	3	0	38	25	52	57	56	30	15	10	24	32	-	-	+	+	+	-	-	-	-	-
chr7	55322259	55323694	0.539098	5.9089	11.8673	0.000571283	0.0495624	ENSG00000132434	5	5	399	364	439	736	336	762	612	689	648	794	+	+	+	+	+	+	+	+	+	+
chr4	174102894	174104175	-0.653271	4.84884	11.86	0.00057353	0.049662	ENSG00000245213	5	5	260	295	301	438	231	314	156	213	174	317	+	+	+	+	+	+	+	+	+	+
chr21	23434947	23435763	-1.01538	2.4647	11.8529	0.000575728	0.04977	ENSG00000237484	3	1	40	55	48	103	73	43	47	32	21	39	-	+	-	+	+	-	-	-	-	+
chr3	24005079	24005302	-1.09597	2.28812	11.8354	0.000581145	0.0499908	ENSG00000197885	3	0	48	42	39	107	46	62	36	25	17	32	-	+	-	+	+	-	-	-	-	-
chr2	227620719	227621173	-0.959303	2.70846	11.8377	0.000580441	0.0499908	ENSG00000169047	4	2	73	62	92	99	64	29	43	29	35	51	+	+	+	+	-	-	-	-	+	+
chr5	34929183	34930428	0.537585	7.5329	11.8381	0.000580323	0.0499908	ENSG00000168724	5	5	1137	1036	896	2383	1277	2448	1936	2528	1732	2845	+	+	+	+	+	+	+	+	+	+
chr8	74060268	74060625	1.16108	2.33707	11.8285	0.000583309	0.0500947	ENSG00000147601	0	4	21	16	25	31	31	92	44	101	62	52	-	-	-	-	-	+	-	+	+	+
chr1	192920704	192921526	-0.764814	3.98982	11.8183	0.000586517	0.0502879	ENSG00000116747	5	5	143	177	154	256	137	150	92	115	86	166	+	+	+	+	+	+	+	+	+	+
chr7	144362531	144363368	-0.698493	4.26483	11.8091	0.000589415	0.0504537	ENSG00000196511	5	5	196	190	139	287	204	184	111	145	139	188	+	+	+	+	+	+	+	+	+	+
chr7	24708654	24709037	-1.11434	2.58431	11.8	0.000592319	0.0506082	ENSG00000105926	5	2	49	95	54	63	66	49	18	38	67	22	+	+	+	+	+	+	-	-	+	-
chr10	88159618	88161353	0.544463	6.59993	11.7973	0.000593152	0.0506082	ENSG00000062650	5	5	650	622	703	1329	441	1266	1049	1139	943	1285	+	+	+	+	+	+	+	+	+	+
chr4	156354558	156355304	-0.844668	3.44177	11.7642	0.000603823	0.0514349	ENSG00000164114	5	5	98	103	93	232	95	108	83	80	61	67	+	+	+	+	+	+	+	+	+	+
chr3	157211313	157211981	-0.906936	3.97306	11.7552	0.000606746	0.0514775	ENSG00000197415	5	5	118	172	131	252	214	123	103	76	74	184	+	+	+	+	+	+	+	+	+	+
chr6	20212314	20213227	0.615727	5.50197	11.7576	0.000605953	0.0514775	ENSG00000172197	5	5	298	254	332	659	172	704	472	563	449	548	+	+	+	+	+	+	+	+	+	+
chr3	62600976	62601400	-0.876086	3.50038	11.7505	0.000608254	0.0514775	ENSG00000241472	5	4	116	93	77	156	161	112	87	112	41	89	+	+	+	+	+	+	+	+	-	+
chr8	25041790	25042655	0.774438	4.3296	11.7518	0.000607831	0.0514775	ENSG00000147459	4	5	126	97	146	295	74	292	285	193	236	191	+	+	+	+	-	+	+	+	+	+
chr16	67571299	67572403	0.72424	4.58439	11.7453	0.000609982	0.0515157	ENSG00000039523	5	5	208	157	203	208	104	181	244	388	214	336	+	+	+	+	+	+	+	+	+	+
chr4	21472129	21472509	0.956539	2.76183	11.7432	0.000610672	0.0515157	ENSG00000163138	1	5	28	31	21	73	49	87	90	66	104	85	-	-	-	+	-	+	+	+	+	+
chr7	31068130	31068770	0.86841	3.24628	11.739	0.000612054	0.0515493	ENSG00000240583	1	5	39	43	33	87	55	222	89	168	84	120	-	-	-	+	-	+	+	+	+	+
chr15	37327252	37327834	-0.746149	4.03162	11.7124	0.000620837	0.0517071	ENSG00000134138	5	5	154	164	93	256	181	183	78	132	128	165	+	+	+	+	+	+	+	+	+	+
chr2	207308012	207308959	0.796125	4.01581	11.7236	0.000617109	0.0517071	ENSG00000204186	4	5	71	95	61	242	81	213	259	180	140	240	+	+	-	+	+	+	+	+	+	+
chr4	37687454	37688733	0.522088	7.692	11.7257	0.000616412	0.0517071	ENSG00000181826	5	5	1375	1333	1214	2511	1240	2557	2079	2718	1965	3133	+	+	+	+	+	+	+	+	+	+
chr7	65540451	65541330	0.552835	5.88198	11.716	0.000619643	0.0517071	ENSG00000126522	5	5	403	339	415	778	304	731	599	772	574	810	+	+	+	+	+	+	+	+	+	+
chr10	61882872	61883764	-0.77549	3.8497	11.7166	0.00061946	0.0517071	ENSG00000108091	5	5	185	130	178	200	129	96	117	85	79	92	+	+	+	+	+	+	+	+	+	+
chr1	169074951	169076313	0.539808	6.54742	11.7156	0.000619791	0.0517071	ENSG00000143153	5	5	657	699	619	1152	435	1046	1115	1129	708	1494	+	+	+	+	+	+	+	+	+	+
chr9	104761624	104762198	0.982196	3.13379	11.7125	0.000620818	0.0517071	ENSG00000155827	1	4	24	18	14	86	38	348	29	104	148	98	-	-	-	+	-	+	-	+	+	+
chr15	44588916	44589578	-1.01828	2.7778	11.6913	0.000627924	0.0520844	ENSG00000166734	3	1	80	61	94	89	70	63	43	42	25	46	+	-	+	+	-	+	-	-	-	-
chr1	90097947	90099383	0.622446	5.97193	11.6871	0.000629344	0.0520844	ENSG00000171488	5	5	342	494	285	716	322	943	712	728	467	1198	+	+	+	+	+	+	+	+	+	+
chr12	76153800	76154098	-1.04937	2.41966	11.6873	0.000629282	0.0520844	ENSG00000111615	4	1	48	60	66	76	60	32	23	35	31	42	-	+	+	+	+	-	-	+	-	-
chr18	28981355	28982412	-0.650406	4.96748	11.6921	0.000627644	0.0520844	ENSG00000046604	5	5	204	274	221	546	361	422	176	151	351	250	+	+	+	+	+	+	+	+	+	+
chr9	101866891	101868284	0.551796	6.49303	11.6711	0.000634778	0.0523943	ENSG00000106799	5	5	694	591	554	1192	407	994	1130	1309	694	1171	+	+	+	+	+	+	+	+	+	+
chr20	6748028	6749382	0.622263	4.99167	11.6702	0.000635089	0.0523943	ENSG00000125845	5	5	235	181	213	439	146	376	466	319	282	402	+	+	+	+	+	+	+	+	+	+
chr18	42116485	42116906	0.939118	3.12105	11.6658	0.000636582	0.0524212	ENSG00000267414	1	5	34	26	32	63	72	185	60	122	157	80	-	-	-	-	+	+	+	+	+	+
chr8	122788428	122788935	-1.15048	2.77102	11.6634	0.000637416	0.0524212	ENSG00000170961	4	1	49	91	74	56	133	34	44	31	21	54	-	+	+	+	+	-	+	-	-	-
chr9	75442758	75443714	-0.770236	3.79265	11.6513	0.000641566	0.0526798	ENSG00000165092	5	5	139	102	142	289	112	162	89	85	82	113	+	+	+	+	+	+	+	+	+	+
chr4	2403744	2404370	0.839019	3.50249	11.6429	0.00064447	0.0527529	ENSG00000159733	3	5	72	42	94	137	52	153	133	137	125	134	+	-	+	+	-	+	+	+	+	+
chr13	38201273	38202090	0.811973	4.41909	11.6438	0.000644157	0.0527529	ENSG00000133110	4	5	39	116	113	199	182	232	197	160	554	157	-	+	+	+	+	+	+	+	+	+
chr21	10030679	10031203	-1.40249	2.31302	11.6356	0.000647002	0.0528456	ENSG00000188681	5	2	63	28	73	61	79	44	36	15	12	24	+	+	+	+	+	+	+	-	-	-
chr4	166128094	166129582	0.54705	6.17964	11.6281	0.000649638	0.0528456	ENSG00000109466	5	5	458	410	331	1049	419	1067	850	873	624	1113	+	+	+	+	+	+	+	+	+	+
chr19	58545125	58545721	0.820142	3.88954	11.6316	0.000648394	0.0528456	ENSG00000176293	5	5	122	98	76	114	66	143	135	282	128	246	+	+	+	+	+	+	+	+	+	+
chr5	156692626	156693802	0.561089	5.78223	11.6283	0.000649561	0.0528456	ENSG00000055163	5	5	311	335	269	721	328	820	528	708	557	852	+	+	+	+	+	+	+	+	+	+
chr3	192804429	192804885	-1.09013	2.23012	11.6117	0.000655377	0.053161	ENSG00000127252	3	1	37	37	30	91	56	83	21	20	30	34	-	+	-	+	+	+	-	-	-	-
chr2	145089440	145090640	0.516097	7.23877	11.6112	0.000655545	0.053161	ENSG00000121964	5	5	1129	1015	855	1952	743	1939	1811	1922	1105	2329	+	+	+	+	+	+	+	+	+	+
chr6	105584264	105585192	0.712086	4.29594	11.605	0.000657751	0.0531753	ENSG00000112276	5	5	124	118	75	212	90	393	168	244	237	276	+	+	+	+	+	+	+	+	+	+
chr1	87793785	87795071	0.509944	6.53619	11.6074	0.000656886	0.0531753	ENSG00000143013	5	5	703	588	604	1186	470	1155	1172	1192	683	1264	+	+	+	+	+	+	+	+	+	+
chr1	212605849	212606825	0.622877	4.76911	11.5995	0.000659679	0.0531758	ENSG00000117691	5	5	195	143	169	342	136	375	300	318	216	478	+	+	+	+	+	+	+	+	+	+
chr1	157107647	157108845	0.607192	5.25429	11.5979	0.00066025	0.0531758	ENSG00000117036	5	5	244	265	232	489	164	461	416	571	300	584	+	+	+	+	+	+	+	+	+	+
chr5	125718746	125719427	-0.886854	3.14518	11.5964	0.000660802	0.0531758	ENSG00000155324	5	2	99	57	101	195	70	81	45	59	57	63	+	+	+	+	+	-	-	+	+	-
chr13	84585246	84585552	-1.25035	1.80468	11.5751	0.000668392	0.0536218	ENSG00000184564	3	1	25	39	43	51	49	17	11	26	20	22	-	+	-	+	+	-	-	+	-	-
chr3	139653444	139655081	0.616258	5.79908	11.5766	0.000667879	0.0536218	ENSG00000158258	5	5	314	359	203	700	301	981	507	611	748	766	+	+	+	+	+	+	+	+	+	+
chr10	134209888	134210884	0.714902	4.4371	11.5636	0.00067254	0.0538721	ENSG00000171813	2	4	163	146	157	249	78	174	315	363	146	262	-	+	+	-	-	-	+	+	+	+
chr9	29077524	29078614	-1.07618	2.60779	11.5552	0.000675592	0.0539224	ENSG00000174482	2	2	64	64	67	100	52	74	32	18	27	60	-	-	+	+	-	+	-	-	-	+
chr3	105153904	105154488	-0.901284	3.56848	11.5534	0.000676256	0.0539224	ENSG00000170017	5	5	89	115	162	167	124	135	55	56	92	82	+	+	+	+	+	+	+	+	+	+
chr6	78078399	78079015	0.905316	3.76142	11.5577	0.000674708	0.0539224	ENSG00000146243	3	5	80	47	129	139	71	119	145	170	106	290	-	+	+	+	-	+	+	+	+	+
chr5	21680183	21680820	-0.707563	4.14667	11.5463	0.000678842	0.0540464	ENSG00000183666	5	5	183	193	178	207	193	145	120	118	109	149	+	+	+	+	+	+	+	+	+	+
chr14	58027513	58027852	-1.16241	2.38853	11.5429	0.000680095	0.0540639	ENSG00000100557	4	3	48	55	53	79	71	22	17	48	27	45	+	+	-	+	+	-	-	+	+	+
chr7	149194011	149195327	0.5434	5.54846	11.531	0.000684434	0.0543264	ENSG00000181220	5	5	289	283	302	612	261	576	568	665	349	657	+	+	+	+	+	+	+	+	+	+
chr3	164972432	164973132	-0.777459	4.04529	11.5105	0.000692034	0.0543975	ENSG00000114200	5	5	138	180	129	182	210	216	78	146	139	90	+	+	+	+	+	+	+	+	+	+
chr11	115906732	115907235	1.10497	2.50904	11.5159	0.000690041	0.0543975	ENSG00000182985	1	4	21	15	22	35	40	135	44	79	51	113	-	-	-	-	+	+	-	+	+	+
chr1	160067823	160069206	0.55492	6.29915	11.4979	0.000696752	0.0543975	ENSG00000162729	5	5	714	658	580	827	301	672	885	997	599	1225	+	+	+	+	+	+	+	+	+	+
chr3	133613389	133615237	0.57967	5.24406	11.5169	0.00068967	0.0543975	ENSG00000154917	5	5	273	210	184	428	221	686	380	414	420	496	+	+	+	+	+	+	+	+	+	+
chr7	113945061	113945441	-1.22339	1.78996	11.5119	0.000691527	0.0543975	ENSG00000128573	3	0	39	24	41	43	55	27	17	9	22	22	+	-	+	-	+	-	-	-	-	-
chr18	41472816	41473604	-0.679682	4.75607	11.4997	0.000696058	0.0543975	ENSG00000132872	5	5	242	301	230	310	320	323	215	190	147	197	+	+	+	+	+	+	+	+	+	+
chr9	68404966	68405381	-1.17334	3.08203	11.5145	0.000690543	0.0543975	ENSG00000170161	3	1	131	67	89	75	127	75	48	33	28	75	+	-	+	-	+	-	+	-	-	-
chr19	8942755	8943771	0.649489	5.60833	11.5051	0.000694041	0.0543975	ENSG00000167785	4	5	503	439	568	417	103	309	809	591	231	467	+	+	+	+	-	+	+	+	+	+
chr12	89456657	89457061	0.970807	3.04674	11.4994	0.000696203	0.0543975	ENSG00000139318	1	4	16	23	24	85	52	240	50	77	181	61	-	-	-	+	-	+	-	+	+	+
chr11	7272863	7274221	0.51911	6.10701	11.5015	0.00069539	0.0543975	ENSG00000170743	5	5	412	468	354	819	408	1155	767	897	580	927	+	+	+	+	+	+	+	+	+	+
chr14	53417008	53418795	0.516688	6.41899	11.5217	0.000687871	0.0543975	ENSG00000073712	5	5	616	573	559	1004	471	1050	1170	995	566	1277	+	+	+	+	+	+	+	+	+	+
chr6	123139024	123139482	-0.843446	3.29244	11.4836	0.000702129	0.0546545	ENSG00000172594	5	5	100	80	80	182	108	92	65	56	79	61	+	+	+	+	+	+	+	+	+	+
chr6	70834937	70835421	-0.938135	2.85613	11.4851	0.000701552	0.0546545	ENSG00000082269	3	2	64	56	51	124	105	70	58	59	27	54	-	+	-	+	+	+	-	+	-	-
chr20	39765261	39766658	0.545274	5.58046	11.4738	0.000705848	0.0548324	ENSG00000124181	5	5	365	285	368	637	196	571	543	661	321	718	+	+	+	+	+	+	+	+	+	+
chr12	40266035	40266705	-1.15288	3.43645	11.472	0.000706508	0.0548324	ENSG00000151229	5	4	112	99	169	126	109	128	57	60	24	98	+	+	+	+	+	+	+	+	-	+
chr4	184365029	184366422	0.517672	6.7229	11.4693	0.000707559	0.0548327	ENSG00000168564	5	5	676	641	677	1475	552	1447	1102	1302	982	1512	+	+	+	+	+	+	+	+	+	+
chr16	431274	432402	0.694519	4.4344	11.4651	0.000709173	0.0548578	ENSG00000236829	0	5	209	141	179	227	75	139	356	276	137	272	-	-	-	-	-	+	+	+	+	+
chr5	115784502	115785136	0.728608	4.99523	11.4629	0.000709977	0.0548578	ENSG00000248445	5	5	116	209	112	310	185	697	261	327	592	293	+	+	+	+	+	+	+	+	+	+
chr6	129814560	129814969	-1.04249	2.5622	11.4576	0.000712011	0.0549339	ENSG00000146376	4	2	54	56	62	82	86	33	47	38	17	50	+	+	-	+	+	-	+	-	-	+
chr15	37513017	37514268	-0.624569	5.4497	11.4535	0.000713602	0.0549757	ENSG00000134138	5	5	355	386	256	529	629	522	206	390	319	512	+	+	+	+	+	+	+	+	+	+
chr4	82965062	82966148	0.565568	5.61113	11.444	0.000717263	0.0550555	ENSG00000138668	5	5	271	240	205	752	315	804	554	528	541	641	+	+	+	+	+	+	+	+	+	+
chr7	79039751	79040006	-1.06911	2.24697	11.4439	0.000717293	0.0550555	ENSG00000234456	3	1	41	54	50	60	64	41	31	31	22	24	-	-	+	+	+	-	-	+	-	-
chr6	118227847	118229666	0.548915	6.13104	11.4426	0.00071779	0.0550555	ENSG00000153989	5	5	346	443	284	943	453	1292	828	813	679	886	+	+	+	+	+	+	+	+	+	+
chr18	77710868	77712315	0.592084	5.44585	11.4366	0.00072011	0.0551527	ENSG00000122490	5	5	289	277	253	625	162	599	480	706	299	633	+	+	+	+	+	+	+	+	+	+
chr8	54891007	54891248	-1.01061	2.76309	11.4227	0.000725521	0.0553244	ENSG00000187735	5	4	71	82	107	70	64	47	35	41	27	49	+	+	+	+	+	+	+	+	-	+
chr7	30220239	30220752	-0.730529	4.04074	11.4246	0.000724765	0.0553244	ENSG00000180354	5	5	124	143	88	275	214	214	89	156	100	168	+	+	+	+	+	+	+	+	+	+
chr8	1921193	1922612	0.670204	4.65957	11.4251	0.000724574	0.0553244	ENSG00000176595	3	5	163	150	154	387	95	303	321	313	217	366	+	-	+	+	-	+	+	+	+	+
chr14	36139089	36139721	-1.00734	3.20992	11.4159	0.0007282	0.055448	ENSG00000174373	5	3	91	83	132	124	86	101	28	62	80	45	+	+	+	+	+	+	-	+	+	-
chr8	85544894	85545299	-0.902113	2.87239	11.4048	0.00073254	0.0556975	ENSG00000184672	3	2	86	78	78	101	69	60	41	40	46	57	-	+	+	-	+	-	-	-	+	+
chr6	160113624	160115068	0.528513	6.09406	11.3966	0.000735792	0.0558637	ENSG00000146457	5	5	476	397	420	959	372	804	840	832	566	993	+	+	+	+	+	+	+	+	+	+
chr1	64333864	64334167	-0.88161	2.95629	11.3799	0.000742412	0.0562317	ENSG00000185483	3	3	61	74	68	117	111	62	54	61	46	47	-	+	-	+	+	+	+	+	-	-
chr3	98241003	98242146	0.504129	7.46618	11.3763	0.000743859	0.0562317	ENSG00000080822	5	5	1158	1153	1060	2079	1089	2394	1737	2110	1688	2763	+	+	+	+	+	+	+	+	+	+
chr20	10467827	10468238	-1.20513	2.74125	11.3768	0.000743671	0.0562317	ENSG00000149346	4	3	52	89	95	74	64	71	13	49	48	37	+	+	+	-	+	+	-	+	+	-
chr4	103810892	103811801	-0.636411	5.2938	11.3624	0.000749469	0.0565741	ENSG00000145354	5	5	257	359	247	592	537	522	249	299	230	448	+	+	+	+	+	+	+	+	+	+
chr9	28365270	28365538	-1.07971	2.46284	11.3507	0.000754204	0.0568201	ENSG00000174482	4	1	41	64	82	76	60	38	28	41	25	31	-	+	+	+	+	-	-	+	-	-
chr7	148580531	148582054	0.517302	6.08945	11.3375	0.000759576	0.0568201	ENSG00000106462	5	5	513	355	432	930	368	912	844	866	511	940	+	+	+	+	+	+	+	+	+	+
chr1	237068434	237069027	-0.93475	3.01591	11.3459	0.000756127	0.0568201	ENSG00000116984	4	4	78	61	89	129	95	94	50	56	43	47	-	+	+	+	+	+	+	+	+	-
chr4	122790964	122791959	0.494447	7.19079	11.3357	0.000760316	0.0568201	ENSG00000138686	5	5	968	943	823	1684	919	2223	1417	1676	1471	2142	+	+	+	+	+	+	+	+	+	+
chr21	10195572	10195851	-1.3477	1.34685	11.3424	0.00075756	0.0568201	ENSG00000188681	4	0	39	27	31	20	34	13	14	12	6	16	+	+	+	-	+	-	-	-	-	-
chr10	79057183	79057426	-0.993716	2.69025	11.343	0.000757332	0.0568201	ENSG00000156113	3	3	64	67	41	78	83	84	41	67	18	49	+	+	-	-	+	+	+	+	-	-
chr6	91469380	91469851	1.00725	2.8711	11.3357	0.00076032	0.0568201	ENSG00000135341	1	5	38	35	20	36	58	182	89	79	66	103	-	-	-	-	+	+	+	+	+	+
chr3	21545392	21545707	-1.31879	1.72682	11.3175	0.0007678	0.057068	ENSG00000151789	3	0	27	31	47	35	63	10	15	13	13	26	-	+	+	-	+	-	-	-	-	-
chr12	71588264	71588900	1.11299	4.31233	11.3222	0.00076586	0.057068	ENSG00000127324	3	5	48	110	41	142	97	583	188	200	425	117	-	+	-	+	+	+	+	+	+	+
chr5	63255032	63255483	0.904667	3.32341	11.3245	0.000764908	0.057068	ENSG00000164197	1	5	79	55	39	70	74	81	143	109	123	147	-	-	-	-	+	+	+	+	+	+
chr18	35021070	35021687	0.605808	5.04914	11.317	0.000767995	0.057068	ENSG00000101489	5	5	168	124	124	438	228	874	336	341	307	448	+	+	+	+	+	+	+	+	+	+
chr18	15173816	15174429	-1.18366	2.13283	11.3071	0.000772107	0.0572923	ENSG00000175322	5	1	72	45	65	51	31	28	25	14	9	42	+	+	+	+	+	-	-	-	-	+
chr3	111527184	111528104	-0.669001	4.31322	11.2524	0.000795186	0.0578575	ENSG00000144824	5	5	154	161	164	306	250	226	109	145	186	146	+	+	+	+	+	+	+	+	+	+
chr10	60272081	60273589	0.626117	5.23216	11.2533	0.00079483	0.0578575	ENSG00000122870	5	5	222	277	140	422	227	518	423	480	441	476	+	+	+	+	+	+	+	+	+	+
chr4	150999176	151000742	0.545579	6.41544	11.2606	0.000791687	0.0578575	ENSG00000170390	5	5	527	562	407	1188	424	1347	909	1003	730	1405	+	+	+	+	+	+	+	+	+	+
chr21	47062564	47064166	0.715648	5.98743	11.2574	0.000793064	0.0578575	ENSG00000183570	5	5	557	497	447	668	194	448	795	1191	446	766	+	+	+	+	+	+	+	+	+	+
chr2	96782082	96783036	0.725865	4.34451	11.2645	0.000790051	0.0578575	ENSG00000186281	4	5	129	147	197	249	49	212	279	257	107	321	-	+	+	+	+	+	+	+	+	+
chr1	47902909	47903945	0.6118	4.83442	11.2678	0.000788613	0.0578575	ENSG00000162368	5	5	211	187	277	328	110	254	371	382	178	408	+	+	+	+	+	+	+	+	+	+
chr4	115703695	115704303	-0.90406	3.06685	11.2809	0.000783077	0.0578575	ENSG00000174607	4	5	57	91	58	118	144	65	66	47	44	64	-	+	+	+	+	+	+	+	+	+
chr4	91416898	91417845	-0.956915	3.06604	11.27	0.000787714	0.0578575	ENSG00000184305	3	4	66	83	64	167	96	69	40	45	50	101	-	+	-	+	+	+	-	+	+	+
chr6	100694088	100694582	0.883634	3.26386	11.2624	0.000790912	0.0578575	ENSG00000112246	1	5	38	21	24	81	90	252	70	91	150	127	-	-	-	-	+	+	+	+	+	+
chr2	191912836	191913227	-0.947411	3.54639	11.2773	0.000784622	0.0578575	ENSG00000115415	5	3	119	67	130	145	177	127	45	88	100	58	+	+	+	+	+	+	-	+	+	-
chr12	54805181	54805493	-1.46642	2.22002	11.2705	0.000787472	0.0578575	ENSG00000161638	4	1	24	87	53	48	50	25	19	58	3	41	-	+	+	+	+	-	-	+	-	-
chr2	203645385	203645843	-0.871602	3.26603	11.2693	0.000787999	0.0578575	ENSG00000163596	5	4	69	122	124	140	99	56	76	58	45	68	+	+	+	+	+	-	+	+	+	+
chr8	60833791	60834338	-1.069	2.45927	11.2611	0.000791484	0.0578575	ENSG00000178538	3	2	37	59	39	91	67	77	20	29	31	60	-	+	-	+	+	+	-	-	-	+
chr7	142551736	142553193	0.574141	5.35517	11.2542	0.000794413	0.0578575	ENSG00000106123	5	5	253	252	228	532	210	710	473	453	392	522	+	+	+	+	+	+	+	+	+	+
chr6	84685513	84685905	-1.05538	2.35113	11.2485	0.000796889	0.057901	ENSG00000135324	3	1	53	60	56	54	60	52	23	21	39	29	-	+	+	-	+	-	-	-	+	-
chr18	23806018	23807200	0.511417	6.54365	11.2457	0.000798071	0.0579065	ENSG00000141380	5	5	639	612	587	1167	480	1379	1079	1040	687	1499	+	+	+	+	+	+	+	+	+	+
chr6	56637613	56638158	-1.06568	2.84377	11.2384	0.000801225	0.058055	ENSG00000151914	4	2	82	59	96	122	56	73	62	42	11	55	-	+	+	+	+	+	+	-	-	-
chr11	61582533	61583229	0.592354	5.2366	11.2345	0.000802921	0.0580976	ENSG00000149485	5	5	287	201	216	423	210	484	390	607	297	563	+	+	+	+	+	+	+	+	+	+
chr6	49524090	49524680	-0.60256	4.819	11.2307	0.000804573	0.0581368	ENSG00000197261	5	5	277	296	268	363	306	178	235	225	168	236	+	+	+	+	+	+	+	+	+	+
chr10	63669778	63670548	-0.907109	3.36935	11.2254	0.000806853	0.0581595	ENSG00000150347	5	5	115	80	99	104	163	104	51	51	71	87	+	+	+	+	+	+	+	+	+	+
chr12	125477840	125478899	0.763818	3.86913	11.2223	0.000808218	0.0581595	ENSG00000184992	2	5	110	69	99	183	56	180	218	214	98	180	+	-	-	+	-	+	+	+	+	+
chr11	104865634	104866158	1.16584	2.48147	11.2224	0.000808177	0.0581595	ENSG00000196954	0	5	32	23	27	42	17	156	73	71	49	50	-	-	-	-	-	+	+	+	+	+
chr8	73607723	73608476	-0.869953	3.29236	11.2073	0.000814772	0.0585507	ENSG00000182674	5	5	103	79	122	151	93	113	55	46	63	72	+	+	+	+	+	+	+	+	+	+
chr3	157193800	157194070	-1.06766	2.35938	11.196	0.000819736	0.0588267	ENSG00000163661	3	1	56	58	58	59	64	23	29	41	17	44	+	+	+	-	-	-	-	-	-	+
chr1	142653930	142654718	-0.881618	4.08813	11.1918	0.000821612	0.0588807	ENSG00000196369	4	4	299	126	188	204	154	135	143	92	56	133	+	+	-	+	+	+	+	+	-	+
chr1	249200188	249201212	0.541432	6.07408	11.1756	0.000828784	0.0593135	ENSG00000185220	5	5	568	620	531	645	270	526	804	913	453	997	+	+	+	+	+	+	+	+	+	+
chr1	70032830	70034357	0.610835	5.16794	11.168	0.000832222	0.0593165	ENSG00000066557	5	5	269	225	182	449	186	427	409	414	373	538	+	+	+	+	+	+	+	+	+	+
chr7	24620144	24620484	-1.00586	2.40881	11.173	0.00082996	0.0593165	ENSG00000105926	3	2	41	55	56	95	57	45	28	38	32	33	-	-	+	+	+	-	-	+	+	-
chr3	56502028	56502774	0.658678	4.40864	11.169	0.00083175	0.0593165	ENSG00000187672	3	5	141	107	141	320	94	246	307	254	165	286	+	-	-	+	+	+	+	+	+	+
chr13	100632541	100633175	0.984635	2.87472	11.1592	0.000836153	0.0595157	ENSG00000175198	1	5	36	51	42	89	19	81	154	72	49	96	-	-	-	+	-	+	+	+	+	+
chr2	209737165	209737784	-0.899132	3.67509	11.1563	0.000837446	0.0595268	ENSG00000144407	5	4	132	120	119	153	166	102	80	110	39	145	+	+	+	+	+	+	+	+	-	+
chr11	27035392	27035880	-1.06957	2.27586	11.1531	0.000838921	0.0595509	ENSG00000109881	2	3	47	30	33	85	66	62	16	41	34	32	-	-	-	+	+	+	-	+	+	-
chr13	49305331	49305711	-0.989798	2.69434	11.1501	0.000840292	0.0595675	ENSG00000136161	3	2	53	89	53	87	60	88	27	46	33	57	-	+	-	+	+	+	-	-	+	-
chr5	11384537	11385677	0.670469	5.27428	11.144	0.000843048	0.0596821	ENSG00000169862	4	5	270	310	130	404	175	588	376	507	446	557	+	+	-	+	+	+	+	+	+	+
chr2	64880407	64881868	0.546179	6.13549	11.1397	0.00084498	0.0597381	ENSG00000179833	5	5	483	444	538	923	331	798	769	992	618	893	+	+	+	+	+	+	+	+	+	+
chr8	41386289	41386962	0.540102	5.5466	11.1263	0.000851106	0.0600901	ENSG00000147533	5	5	358	314	372	486	251	483	501	619	398	659	+	+	+	+	+	+	+	+	+	+
chr4	89885059	89886007	-0.862012	4.0054	11.1237	0.000852293	0.060093	ENSG00000138640	5	4	195	114	134	329	124	149	48	126	174	116	+	+	+	+	+	+	-	+	+	+
chr9	138798906	138800164	0.640761	5.61205	11.1179	0.000855004	0.060203	ENSG00000130559	5	5	429	350	385	637	138	299	798	737	275	578	+	+	+	+	+	+	+	+	+	+
chr15	86210914	86211710	-0.759035	3.83126	11.1143	0.000856647	0.0602378	ENSG00000183655	5	5	138	148	147	215	134	103	101	120	58	143	+	+	+	+	+	+	+	+	+	+
chr21	9571757	9572150	-1.16038	1.97844	11.1051	0.000860915	0.0603962	ENSG00000188681	3	0	59	35	58	55	27	34	19	19	12	29	-	+	+	+	-	-	-	-	-	-
chr6	167369555	167370996	0.510829	6.2618	11.1045	0.000861205	0.0603962	ENSG00000026297	5	5	478	521	449	882	436	1240	707	945	772	1080	+	+	+	+	+	+	+	+	+	+
chr7	63923981	63924648	0.942283	4.21235	11.0863	0.000869682	0.0604057	ENSG00000173041	3	5	81	87	189	257	35	255	163	333	96	352	-	+	+	+	-	+	+	+	+	+
chr8	9854960	9855397	1.19294	2.19978	11.0633	0.000880525	0.0604057	ENSG00000175806	0	3	28	10	25	30	18	115	50	48	25	96	-	-	-	-	-	+	+	-	-	+
chr11	20265020	20265547	0.911068	3.1152	11.0959	0.000865184	0.0604057	ENSG00000109854	2	5	52	38	31	72	60	145	106	84	83	162	-	-	-	+	+	+	+	+	+	+
chr7	114270072	114270793	-0.8969	3.1431	11.0674	0.000878583	0.0604057	ENSG00000135272	4	3	86	86	56	151	88	120	38	38	67	100	+	+	-	+	+	+	-	-	+	+
chr11	27721600	27722764	0.779302	3.90502	11.0634	0.000880481	0.0604057	ENSG00000245573	1	5	106	92	68	176	64	164	183	184	120	294	-	-	-	+	-	+	+	+	+	+
chr7	154113212	154113527	-0.929665	3.18577	11.0862	0.000869731	0.0604057	ENSG00000130226	5	2	94	104	84	79	129	68	41	101	44	62	+	+	+	+	+	-	+	+	-	-
chr1	186685025	186685527	-1.11208	2.57475	11.0896	0.000868125	0.0604057	ENSG00000073756	5	1	77	61	68	53	89	30	39	27	18	54	+	+	+	+	+	-	-	+	-	-
chr3	24535529	24537371	0.532941	6.44843	11.0674	0.0008786	0.0604057	ENSG00000151090	5	5	584	600	591	1067	425	1361	967	947	863	1077	+	+	+	+	+	+	+	+	+	+
chr1	88928173	88928862	0.83791	3.35208	11.0752	0.000874903	0.0604057	ENSG00000065243	2	5	80	46	59	128	43	111	147	110	102	142	+	-	-	+	-	+	+	+	+	+
chr3	107169225	107169604	-1.30224	2.09365	11.0633	0.000880537	0.0604057	ENSG00000114439	4	1	43	60	72	40	33	43	12	20	14	34	+	+	+	+	-	+	-	-	-	-
chr4	164509252	164510298	-0.674922	4.8407	11.1005	0.000863026	0.0604057	ENSG00000198498	5	5	146	257	181	490	330	538	130	195	289	218	+	+	+	+	+	+	+	+	+	+
chr2	166692463	166692750	-1.33738	1.43125	11.0624	0.000880943	0.0604057	ENSG00000115339	3	0	24	12	31	47	48	21	13	7	11	21	-	-	+	+	+	-	-	-	-	-
chr1	91316217	91317687	0.540089	5.74349	11.0679	0.000878342	0.0604057	ENSG00000233593	5	5	381	370	375	603	244	778	487	588	461	944	+	+	+	+	+	+	+	+	+	+
chr2	109149945	109151654	0.498364	6.33007	11.0859	0.000869867	0.0604057	ENSG00000169756	5	5	573	524	562	970	445	987	891	997	681	1143	+	+	+	+	+	+	+	+	+	+
chr7	137608156	137608444	-1.03878	2.65955	11.0797	0.000872785	0.0604057	ENSG00000182158	4	1	69	50	72	78	89	47	44	47	19	48	+	-	+	+	+	-	-	+	-	-
chr3	190303569	190304071	-0.945208	2.89478	11.0818	0.000871779	0.0604057	ENSG00000196083	4	2	56	84	118	114	68	38	64	42	23	53	+	+	+	+	-	-	+	-	-	+
chr5	108522275	108522861	-1.02538	2.66069	11.0638	0.000880319	0.0604057	ENSG00000198961	3	2	69	36	43	121	75	90	39	45	18	63	+	-	-	+	+	+	-	-	-	+
chr6	82498413	82498916	-0.934714	2.99431	11.0549	0.000884544	0.0605733	ENSG00000112773	5	2	64	79	69	162	74	105	64	51	34	46	+	+	+	+	+	+	+	-	-	-
chr5	16178892	16180679	0.701947	5.14123	11.0486	0.000887526	0.0606191	ENSG00000183654	5	5	217	216	124	491	157	642	432	327	356	556	+	+	+	+	+	+	+	+	+	+
chr1	230561376	230562687	0.607256	5.58299	11.0499	0.000886931	0.0606191	ENSG00000177614	5	5	427	308	283	624	189	394	707	697	315	657	+	+	+	+	+	+	+	+	+	+
chr5	130545230	130545943	0.602051	4.77382	11.04	0.000891682	0.0607795	ENSG00000158985	5	5	161	126	110	303	190	587	242	317	292	399	+	+	+	+	+	+	+	+	+	+
chr2	213886735	213887953	-0.775675	3.64815	11.0389	0.000892195	0.0607795	ENSG00000030419	3	4	113	108	101	205	131	165	65	103	73	120	-	+	+	+	-	+	-	+	+	+
chr6	152530369	152530654	-0.942267	2.85559	11.0336	0.000894737	0.0608735	ENSG00000131018	5	2	63	78	63	112	85	57	32	49	43	77	+	+	+	+	+	-	-	-	+	+
chr15	60519115	60519538	-0.940861	3.14667	11.0306	0.000896215	0.0608949	ENSG00000182718	4	5	80	67	77	127	134	74	35	82	54	79	-	+	+	+	+	+	+	+	+	+
chr10	312948	313440	-0.906407	2.90539	11.0171	0.000902765	0.0610068	ENSG00000015171	3	3	52	58	42	146	87	130	28	66	55	54	-	+	-	+	+	+	-	+	+	-
chr1	148845763	148846108	-1.39281	1.4585	11.0246	0.000899116	0.0610068	ENSG00000232527	3	0	46	16	37	27	36	18	9	14	8	23	+	-	+	-	+	-	-	-	-	-
chr5	171614594	171615920	0.604431	6.05905	11.0136	0.000904444	0.0610068	ENSG00000072786	5	5	368	442	410	947	277	1038	678	895	691	825	+	+	+	+	+	+	+	+	+	+
chr3	140185987	140186306	-1.06275	2.40703	11.0132	0.000904674	0.0610068	ENSG00000114120	5	1	71	59	54	60	48	39	34	59	11	36	+	+	+	+	+	-	-	+	-	-
chr1	85741840	85742785	0.500664	7.21758	11.0128	0.000904848	0.0610068	ENSG00000142867	5	5	1142	1024	995	1576	847	1711	1475	1956	1242	2382	+	+	+	+	+	+	+	+	+	+
chr5	103425179	103425394	-0.890059	3.31229	11.0186	0.000902009	0.0610068	ENSG00000112874	4	2	82	67	74	197	156	48	94	87	64	37	+	-	+	+	+	-	+	+	-	-
chr3	152436725	152437410	-0.830055	3.49921	11.0038	0.000909247	0.0612246	ENSG00000169860	5	4	106	99	88	150	160	109	57	85	70	113	+	+	+	+	+	+	-	+	+	+
chr3	21976253	21976592	-1.31137	1.95159	10.9857	0.00091819	0.0616683	ENSG00000151789	3	1	42	38	43	31	70	36	17	10	16	30	-	+	+	-	+	+	-	-	-	-
chr7	56355089	56356035	0.668454	4.77657	10.9879	0.000917094	0.0616683	ENSG00000185290	5	5	97	99	119	394	208	570	254	305	244	501	+	+	+	+	+	+	+	+	+	+
chr5	158526071	158526425	0.905655	3.10725	10.9802	0.000920902	0.0617712	ENSG00000164330	1	4	36	48	45	115	30	155	103	80	97	128	-	-	-	+	-	+	+	+	+	-
chr2	148621305	148621785	-0.839011	3.36797	10.9778	0.000922091	0.0617719	ENSG00000121989	5	5	73	115	99	139	130	102	51	68	82	76	+	+	+	+	+	+	+	+	+	+
chr4	132456003	132456450	-1.06533	2.51205	10.9742	0.00092387	0.061812	ENSG00000138650	3	4	61	28	44	109	74	70	32	51	18	47	+	-	-	+	+	+	+	+	-	+
chr16	53164040	53165799	0.579959	6.69684	10.9616	0.000930193	0.0619419	ENSG00000177200	5	5	799	692	715	1413	417	848	1297	1661	723	1455	+	+	+	+	+	+	+	+	+	+
chr1	100315091	100316223	0.520091	5.70313	10.9597	0.000931154	0.0619419	ENSG00000162688	5	5	379	347	320	590	263	841	512	613	464	765	+	+	+	+	+	+	+	+	+	+
chr8	6949214	6950137	0.628557	4.72157	10.9562	0.000932906	0.0619419	ENSG00000164825	5	5	153	151	154	356	141	346	285	343	284	348	+	+	+	+	+	+	+	+	+	+
chr4	143861697	143862316	0.594	4.84112	10.9644	0.000928788	0.0619419	ENSG00000109452	5	5	122	147	96	289	218	716	212	404	328	350	+	+	+	+	+	+	+	+	+	+
chr7	148395361	148397276	0.548195	6.21458	10.9563	0.000932873	0.0619419	ENSG00000055130	5	5	488	454	365	1126	355	1066	827	884	672	1130	+	+	+	+	+	+	+	+	+	+
chr7	131240782	131241890	0.593435	4.96132	10.9666	0.000927682	0.0619419	ENSG00000128567	5	5	238	190	198	410	138	375	426	389	237	410	+	+	+	+	+	+	+	+	+	+
chr4	141533037	141533333	-0.839421	3.56171	10.9523	0.000934892	0.0619612	ENSG00000179387	5	4	114	101	106	159	122	191	46	97	78	94	+	+	+	+	+	+	-	+	+	+
chr18	1292188	1292933	-0.926857	3.09064	10.9486	0.000936745	0.0619612	ENSG00000141433	4	3	83	57	72	182	91	63	61	77	23	95	+	+	-	+	+	+	-	+	-	+
chr2	241507269	241508436	0.622085	4.83414	10.9496	0.000936258	0.0619612	ENSG00000144504	3	5	210	166	165	311	162	260	434	482	179	356	-	-	+	+	+	+	+	+	+	+
chr13	100784345	100784777	-0.870669	3.87568	10.9431	0.00093951	0.0619876	ENSG00000175198	5	5	119	200	118	211	149	195	110	70	83	96	+	+	+	+	+	+	+	+	+	+
chr5	2751009	2752454	0.732362	5.1314	10.9448	0.000938642	0.0619876	ENSG00000186493	4	5	150	221	146	502	155	559	334	474	478	440	-	+	+	+	+	+	+	+	+	+
chr4	160217254	160218009	-0.795902	3.55884	10.93	0.00094619	0.0623498	ENSG00000109756	4	3	93	131	88	128	205	79	98	68	77	74	+	+	-	+	+	-	+	-	+	+
chr17	49243488	49244623	0.583621	5.1844	10.926	0.000948222	0.0624051	ENSG00000243678	5	5	297	246	342	355	154	349	412	549	234	506	+	+	+	+	+	+	+	+	+	+
chr1	120173711	120174689	0.603281	4.76746	10.9224	0.000950088	0.0624495	ENSG00000143067	5	5	197	154	158	268	149	469	268	354	204	457	+	+	+	+	+	+	+	+	+	+
chr3	127261151	127261841	0.600386	4.99003	10.92	0.000951331	0.0624528	ENSG00000073111	5	5	184	167	126	303	219	640	236	523	347	404	+	+	+	+	+	+	+	+	+	+
chr1	95698885	95700160	0.513529	6.42692	10.9141	0.000954336	0.0625717	ENSG00000122481	5	5	663	595	624	1077	397	985	938	928	754	1334	+	+	+	+	+	+	+	+	+	+
chr4	5894135	5895164	0.606089	5.28307	10.9097	0.000956617	0.0626429	ENSG00000072832	4	5	229	265	134	456	235	522	404	647	341	594	+	-	+	+	+	+	+	+	+	+
chr2	44518311	44519223	-0.630323	4.48997	10.9003	0.000961473	0.0628822	ENSG00000138079	5	5	190	222	205	330	252	190	205	180	125	163	+	+	+	+	+	+	+	+	+	+
chr9	132934059	132935004	0.76056	3.94479	10.8969	0.000963273	0.0629214	ENSG00000107130	2	5	103	106	87	165	66	135	188	259	117	244	-	+	-	+	-	+	+	+	+	+
chr10	23002153	23004175	0.579738	5.26456	10.8864	0.000968728	0.063199	ENSG00000150867	5	5	243	210	175	515	216	642	537	545	289	426	+	+	+	+	+	+	+	+	+	+
chr12	41136412	41136743	-1.03028	2.58583	10.8831	0.000970436	0.0632316	ENSG00000018236	5	2	48	80	76	63	73	43	35	44	20	45	+	+	+	+	+	-	-	+	-	+
chr4	47512246	47513071	-0.872656	3.08419	10.8766	0.000973853	0.0633754	ENSG00000145246	5	3	89	66	70	157	70	116	32	40	89	64	+	+	+	+	+	+	-	-	+	+
chr18	33160785	33162195	0.551069	5.54933	10.8736	0.000975442	0.0634001	ENSG00000141429	5	5	284	249	219	723	270	657	648	564	336	698	+	+	+	+	+	+	+	+	+	+
chr18	29176021	29176525	-0.869226	3.60553	10.8565	0.000984507	0.06391	ENSG00000118271	4	4	100	62	88	302	124	220	63	84	97	54	-	+	+	+	+	+	+	+	+	-
chr3	21715011	21715284	-1.27695	2.00217	10.8492	0.000988363	0.0640017	ENSG00000151789	3	2	35	57	49	51	35	40	23	22	5	38	-	+	+	+	-	+	-	+	-	-
chr2	198024088	198024974	-0.655852	4.38767	10.8511	0.000987352	0.0640017	ENSG00000065413	5	5	207	262	189	222	222	165	129	158	133	196	+	+	+	+	+	+	+	+	+	+
chr6	25251180	25251470	-1.06286	2.19762	10.8416	0.000992425	0.0641129	ENSG00000079691	5	1	53	37	60	84	42	25	27	35	23	22	+	+	+	+	+	-	-	+	-	-
chr10	23788249	23789849	-0.704962	4.59102	10.8415	0.000992528	0.0641129	ENSG00000165312	5	4	194	247	248	268	281	256	98	211	218	167	+	+	+	+	+	+	-	+	+	+
chr8	23398448	23399404	-0.879617	3.25837	10.8302	0.000998604	0.0642865	ENSG00000147454	3	0	99	89	143	181	60	54	111	43	23	64	+	-	+	+	-	-	-	-	-	-
chr2	40129199	40129518	-1.00447	2.33902	10.8296	0.000998897	0.0642865	ENSG00000227028	4	0	51	38	50	100	53	42	31	43	23	31	+	+	+	+	-	-	-	-	-	-
chr1	185889800	185890091	-1.13789	2.19911	10.8319	0.000997654	0.0642865	ENSG00000116690	3	1	21	44	59	66	81	29	36	31	14	22	-	-	+	+	+	-	+	-	-	-
chr11	79735132	79735522	-1.06657	2.39413	10.8255	0.00100113	0.0643513	ENSG00000149256	3	2	54	49	48	85	62	38	27	59	28	22	-	+	-	+	+	-	-	+	+	-
chr1	142903735	142904150	-1.45126	2.20272	10.8215	0.00100326	0.0644091	ENSG00000196369	5	2	84	27	71	46	55	32	31	16	6	30	+	+	+	+	+	+	+	-	-	-
chr4	38868932	38869989	0.574201	5.06067	10.8167	0.00100586	0.0644181	ENSG00000197712	5	5	206	190	217	455	159	478	363	485	250	486	+	+	+	+	+	+	+	+	+	+
chr6	88678141	88678770	0.868487	2.99845	10.8187	0.00100481	0.0644181	ENSG00000135334	2	5	35	25	48	82	55	153	79	73	115	98	-	-	-	+	+	+	+	+	+	+
chr5	114504867	114506395	0.49815	7.25062	10.811	0.00100897	0.0644737	ENSG00000164219	5	5	936	1127	945	1672	942	2039	1583	1847	1335	2339	+	+	+	+	+	+	+	+	+	+
chr2	131113062	131114218	0.500986	6.21959	10.8106	0.00100919	0.0644737	ENSG00000072135	5	5	578	468	487	948	354	1036	793	973	603	1041	+	+	+	+	+	+	+	+	+	+
chr12	133066124	133067354	0.706654	5.09849	10.8059	0.00101177	0.0645157	ENSG00000112787	3	5	317	296	253	383	80	235	560	473	211	397	-	+	+	+	-	+	+	+	+	+
chr19	30335271	30336547	0.565286	5.44687	10.8049	0.00101231	0.0645157	ENSG00000105173	5	5	417	339	391	472	133	398	532	577	278	581	+	+	+	+	+	+	+	+	+	+
chr22	50638881	50640015	0.681467	4.81985	10.7979	0.00101617	0.0646046	ENSG00000073169	5	5	251	211	190	322	79	195	408	512	150	366	+	+	+	+	+	+	+	+	+	+
chr14	81672168	81672942	-0.774754	3.86701	10.7997	0.00101516	0.0646046	ENSG00000165417	5	4	122	183	168	162	169	74	94	145	75	100	+	+	+	+	+	-	+	+	+	+
chr1	16970600	16971607	-0.560937	5.34602	10.7891	0.00102098	0.0648318	ENSG00000215908	5	5	338	443	386	619	337	314	335	472	165	386	+	+	+	+	+	+	+	+	+	+
chr2	159824453	159825730	0.513861	5.74821	10.786	0.00102271	0.0648626	ENSG00000115183	5	5	344	292	375	817	265	777	613	596	442	781	+	+	+	+	+	+	+	+	+	+
chr2	85132317	85133510	0.58303	5.56081	10.7816	0.00102514	0.0649383	ENSG00000034510	5	5	316	339	320	634	175	613	497	625	409	675	+	+	+	+	+	+	+	+	+	+
chr19	20108467	20108925	-1.15343	2.17895	10.7563	0.00103923	0.0650441	ENSG00000197124	3	1	96	32	82	48	25	23	18	24	14	27	+	-	+	+	-	-	-	+	-	-
chr10	52343141	52343384	-0.967029	2.59095	10.7569	0.0010389	0.0650441	ENSG00000198964	3	2	40	85	72	89	63	28	53	40	20	42	-	+	-	+	+	-	+	+	-	-
chr12	48166725	48167721	0.543512	5.4881	10.7569	0.00103889	0.0650441	ENSG00000079337	5	5	296	260	229	599	257	657	513	521	368	727	+	+	+	+	+	+	+	+	+	+
chr1	226309122	226310581	0.544369	5.24285	10.7747	0.00102896	0.0650441	ENSG00000163041	5	5	312	246	305	420	185	404	497	416	280	533	+	+	+	+	+	+	+	+	+	+
chr5	45507236	45507738	0.742984	4.21711	10.7703	0.00103141	0.0650441	ENSG00000112996	4	5	92	81	79	154	144	320	179	393	140	249	-	+	+	+	+	+	+	+	+	+
chr1	142933702	142934164	-1.2741	1.95466	10.762	0.00103606	0.0650441	ENSG00000196369	3	1	60	44	54	30	43	17	21	18	6	37	+	+	+	-	-	-	-	-	-	+
chr7	82434552	82435155	-0.718016	4.04971	10.7591	0.00103769	0.0650441	ENSG00000186472	5	5	182	175	138	266	143	150	155	116	70	137	+	+	+	+	+	+	+	+	+	+
chr2	119980947	119981992	0.552443	5.17751	10.7675	0.00103299	0.0650441	ENSG00000115107	5	5	257	192	247	510	159	578	407	426	271	531	+	+	+	+	+	+	+	+	+	+
chr14	42455776	42456239	-1.10218	2.40921	10.7728	0.00103002	0.0650441	ENSG00000165379	3	1	40	85	77	54	55	25	27	38	16	42	-	+	+	-	+	-	+	-	-	-
chr4	16227410	16229252	0.542608	6.03953	10.7612	0.00103653	0.0650441	ENSG00000169762	5	5	376	395	365	1052	345	760	839	853	503	1004	+	+	+	+	+	+	+	+	+	+
chr7	126987639	126988282	0.595059	4.8677	10.7537	0.00104069	0.0650579	ENSG00000048405	5	5	174	167	165	439	135	433	347	364	242	419	+	+	+	+	+	+	+	+	+	+
chr1	121260633	121261698	0.581528	5.12412	10.7447	0.00104579	0.065247	ENSG00000171943	5	5	285	185	193	422	170	478	358	437	251	659	+	+	+	+	+	+	+	+	+	+
chr1	9749162	9750141	0.662076	4.55489	10.744	0.0010462	0.065247	ENSG00000231789	5	5	171	186	156	231	101	209	292	405	176	295	+	+	+	+	+	+	+	+	+	+
chr18	48499767	48499996	-0.915019	3.06751	10.7412	0.00104775	0.0652658	ENSG00000141646	4	2	93	70	103	126	75	88	36	70	48	57	+	-	+	+	+	+	-	+	-	-
chr1	36653525	36654107	-0.883102	2.99003	10.7346	0.00105149	0.0654207	ENSG00000116871	4	3	68	58	52	147	83	133	34	68	37	85	+	+	-	+	+	+	-	+	-	+
chr21	32091818	32092029	-0.944249	3.19198	10.7009	0.00107084	0.0655773	ENSG00000156299	5	3	100	118	116	72	109	50	71	63	22	73	+	+	+	+	+	-	+	+	-	+
chr2	230303233	230303733	-0.901642	2.82153	10.7098	0.0010657	0.0655773	ENSG00000153823	4	3	71	46	65	157	69	63	33	48	54	53	-	+	+	+	+	+	-	-	+	+
chr2	204443349	204444578	-0.622865	4.58103	10.707	0.00106733	0.0655773	ENSG00000173166	5	5	227	177	288	396	242	176	222	157	132	181	+	+	+	+	+	+	+	+	+	+
chr4	3147393	3147652	-1.15987	2.04904	10.7066	0.00106757	0.0655773	ENSG00000197386	2	2	25	27	17	81	60	68	9	47	18	39	-	-	-	+	+	+	-	+	-	-
chr7	146658547	146659189	-0.687943	4.3508	10.7144	0.00106307	0.0655773	ENSG00000055130	5	5	200	221	218	272	217	94	130	145	154	172	+	+	+	+	+	+	+	+	+	+
chr2	61964086	61964395	-1.22068	2.3967	10.7116	0.00106464	0.0655773	ENSG00000170264	4	2	62	72	49	27	76	50	11	39	19	54	+	+	+	-	+	-	-	+	-	+
chr9	35258453	35259178	-0.889262	3.00935	10.716	0.00106213	0.0655773	ENSG00000198722	5	3	65	67	64	159	92	73	39	77	44	74	+	+	+	+	+	+	-	+	-	+
chr8	12516230	12517252	0.643427	4.753	10.6975	0.00107278	0.0655773	ENSG00000154359	5	5	153	133	196	416	117	364	285	394	240	354	+	+	+	+	+	+	+	+	+	+
chr4	75941767	75942035	-1.01245	2.39702	10.7073	0.00106715	0.0655773	ENSG00000169116	2	2	68	40	57	80	52	52	29	33	20	46	+	-	-	+	-	+	-	+	-	-
chr1	179098912	179099436	-1.15628	2.16926	10.7105	0.00106526	0.0655773	ENSG00000186283	2	2	39	44	37	58	59	65	16	24	17	51	-	+	-	-	+	+	-	-	-	+
chr4	154196107	154196642	-0.812818	3.52079	10.7105	0.00106532	0.0655773	ENSG00000109654	5	5	115	94	130	160	141	81	73	86	60	99	+	+	+	+	+	+	+	+	+	+
chr11	91787114	91787618	0.873156	3.4517	10.7046	0.00106868	0.0655773	ENSG00000180773	1	5	52	35	28	83	74	347	87	161	135	95	-	-	-	+	-	+	+	+	+	+
chr1	64935418	64936680	0.610613	4.81972	10.724	0.00105757	0.0655773	ENSG00000158966	5	5	187	194	176	366	122	344	411	318	184	437	+	+	+	+	+	+	+	+	+	+
chr14	69567841	69568493	-0.946718	2.75858	10.6996	0.00107156	0.0655773	ENSG00000139990	4	2	102	83	53	95	52	59	48	35	32	48	+	+	-	+	+	+	-	-	+	-
chr6	83764014	83764318	-0.842168	3.12902	10.699	0.00107193	0.0655773	ENSG00000118420	5	1	72	80	79	123	113	78	37	44	96	66	+	+	+	+	+	-	-	-	+	-
chr10	73565646	73566023	-1.02768	2.33623	10.6801	0.00108292	0.0661197	ENSG00000107738	3	0	54	59	76	65	44	26	48	26	13	28	+	+	+	-	-	-	-	-	-	-
chr8	61749467	61750026	-1.06587	2.43962	10.6779	0.00108421	0.0661218	ENSG00000171316	3	0	67	36	37	96	73	33	48	45	14	44	+	-	-	+	+	-	-	-	-	-
chr2	182321750	182322948	0.694432	4.29254	10.6735	0.00108683	0.0662046	ENSG00000115232	5	5	143	122	90	225	94	291	235	191	187	325	+	+	+	+	+	+	+	+	+	+
chr4	154680741	154681412	0.934448	2.90736	10.6696	0.00108909	0.0662648	ENSG00000145423	0	5	62	35	29	64	32	123	114	110	54	92	-	-	-	-	-	+	+	+	+	+
chr11	4629041	4629848	0.492764	6.37563	10.6649	0.00109186	0.0663561	ENSG00000167333	5	5	585	574	571	909	440	1222	768	1007	741	1258	+	+	+	+	+	+	+	+	+	+
chr1	74992482	74993142	0.968687	3.19577	10.6627	0.00109318	0.0663598	ENSG00000178965	1	4	33	29	31	101	44	283	88	50	172	73	-	-	-	+	-	+	+	-	+	+
chr13	77211691	77212228	0.961465	2.71964	10.6605	0.00109447	0.0663611	ENSG00000178695	1	4	20	20	11	64	53	179	57	43	109	86	-	-	-	-	+	+	+	-	+	+
chr1	86966362	86966698	0.773088	3.63718	10.6559	0.00109723	0.0664021	ENSG00000122417	0	4	64	44	48	141	78	289	111	99	198	147	-	-	-	-	-	+	+	+	+	-
chr5	54468792	54469604	0.589166	4.85515	10.6551	0.00109768	0.0664021	ENSG00000164294	5	5	171	161	199	370	178	313	380	364	221	435	+	+	+	+	+	+	+	+	+	+
chr15	35849687	35850060	-0.959465	2.63239	10.6413	0.00110589	0.0665914	ENSG00000248079	3	1	54	66	53	93	87	48	47	21	40	44	-	+	-	+	+	-	-	-	+	-
chr20	29646010	29647254	-0.803409	5.26614	10.6459	0.00110317	0.0665914	ENSG00000101294	5	3	511	298	459	456	403	342	289	194	139	417	+	+	+	+	+	+	+	-	-	+
chr10	57390714	57391491	0.579645	5.48935	10.6415	0.00110578	0.0665914	ENSG00000122952	5	5	324	307	197	540	223	638	420	542	478	724	+	+	+	+	+	+	+	+	+	+
chr18	2411474	2411855	-0.982701	2.48951	10.6439	0.00110435	0.0665914	ENSG00000101574	3	0	56	39	59	99	70	54	43	32	28	29	+	-	-	+	+	-	-	-	-	-
chr13	24749707	24749930	-1.23431	1.91253	10.6342	0.00111017	0.0667723	ENSG00000182957	3	0	36	28	57	68	36	43	19	16	21	11	-	-	+	+	+	-	-	-	-	-
chr6	101013177	101013846	-0.835838	3.24928	10.615	0.00112174	0.0668281	ENSG00000112246	5	4	80	78	67	196	87	139	43	49	91	74	+	+	+	+	+	+	-	+	+	+
chr9	32384201	32385259	0.489184	6.28799	10.6184	0.00111971	0.0668281	ENSG00000122729	5	5	558	460	511	1000	420	1139	752	947	713	1157	+	+	+	+	+	+	+	+	+	+
chr5	106963242	106963885	-0.990749	2.34612	10.6242	0.00111615	0.0668281	ENSG00000184349	3	1	41	52	52	63	74	39	24	30	47	23	-	-	+	+	+	-	-	-	+	-
chr5	131601274	131601823	0.678124	4.28202	10.6172	0.00112039	0.0668281	ENSG00000131435	5	5	116	71	93	227	110	431	137	224	279	239	+	+	+	+	+	+	+	+	+	+
chr10	134120483	134122126	0.558651	5.92896	10.6263	0.00111492	0.0668281	ENSG00000165752	5	5	488	411	341	746	284	709	667	903	548	795	+	+	+	+	+	+	+	+	+	+
chr12	123519446	123519853	-0.975673	3.35309	10.6295	0.00111298	0.0668281	ENSG00000150967	5	4	88	92	108	182	88	126	31	120	55	72	+	+	+	+	+	+	-	+	+	+
chr3	150803014	150805090	0.518347	6.93775	10.6192	0.0011192	0.0668281	ENSG00000144893	5	5	647	762	568	1761	672	2264	1166	1431	1212	1833	+	+	+	+	+	+	+	+	+	+
chr6	74679773	74680730	0.794631	3.5791	10.6227	0.0011171	0.0668281	ENSG00000156535	1	4	71	102	53	64	104	114	139	108	171	159	-	+	-	-	-	-	+	+	+	+
chr4	114305695	114306085	-1.0046	2.94513	10.6136	0.00112258	0.0668281	ENSG00000145349	5	4	75	86	73	90	106	71	49	32	29	80	+	+	+	+	+	+	+	+	-	+
chr5	162422742	162423145	-1.02957	2.40868	10.6094	0.00112517	0.0668418	ENSG00000113328	3	1	34	77	51	70	68	34	23	33	38	39	-	+	-	+	+	-	-	-	+	-
chr5	28670443	28671138	1.1471	3.13051	10.609	0.00112536	0.0668418	ENSG00000113361	3	4	66	25	70	77	40	50	98	170	114	96	-	-	+	+	+	-	+	+	+	+
chr21	44846628	44847423	0.612452	5.23139	10.5976	0.00113237	0.0670204	ENSG00000142178	4	5	275	232	275	481	167	249	592	634	234	430	+	+	+	+	-	+	+	+	+	+
chr3	4344774	4345873	0.527573	6.0176	10.6002	0.00113073	0.0670204	ENSG00000170364	5	5	405	415	329	880	308	1173	684	723	487	1098	+	+	+	+	+	+	+	+	+	+
chr2	191134927	191135531	-0.843893	3.34475	10.5935	0.00113485	0.0670204	ENSG00000151689	5	5	68	119	99	160	114	102	64	58	66	79	+	+	+	+	+	+	+	+	+	+
chr5	16554288	16554710	0.917432	3.21302	10.5956	0.00113359	0.0670204	ENSG00000154153	2	5	53	22	37	102	59	166	85	140	138	92	-	-	-	+	+	+	+	+	+	+
chr3	817246	817825	-0.859353	3.22617	10.5916	0.00113605	0.0670204	ENSG00000224957	5	4	81	94	86	117	108	127	40	72	60	76	+	+	+	+	+	+	-	+	+	+
chr5	163804661	163805339	-0.709522	4.16718	10.5948	0.00113408	0.0670204	ENSG00000241956	5	5	126	165	147	315	192	249	115	148	130	113	+	+	+	+	+	+	+	+	+	+
chr7	122668344	122669170	-0.926855	2.939	10.5888	0.00113775	0.0670455	ENSG00000081803	3	4	57	98	67	82	117	66	47	46	37	65	-	+	-	+	+	+	+	+	-	+
chr5	58357079	58357466	-0.99485	2.27951	10.5709	0.00114883	0.0674047	ENSG00000152932	2	3	46	42	42	74	60	52	20	32	33	38	-	-	-	+	+	+	-	-	+	+
chr8	91657189	91658815	0.497024	7.00624	10.5713	0.00114856	0.0674047	ENSG00000123119	5	5	773	832	745	1803	714	1775	1429	1588	1085	1921	+	+	+	+	+	+	+	+	+	+
chr12	75602849	75603650	0.762304	3.89676	10.5706	0.001149	0.0674047	ENSG00000180881	4	5	91	92	56	153	69	268	127	137	231	215	+	+	-	+	+	+	+	+	+	+
chr12	48212637	48214285	0.565292	4.9806	10.5733	0.00114735	0.0674047	ENSG00000061273	5	5	244	216	224	336	151	412	401	377	220	452	+	+	+	+	+	+	+	+	+	+
chr2	42086983	42087552	-1.12342	2.01411	10.5567	0.00115765	0.0677609	ENSG00000162878	3	1	21	45	71	87	30	8	44	21	13	14	-	+	+	+	-	-	+	-	-	-
chr9	7123791	7124163	-0.852779	3.34077	10.5573	0.00115733	0.0677609	ENSG00000107077	5	4	101	106	98	139	91	122	43	102	55	79	+	+	+	+	+	+	+	+	-	+
chr11	28603976	28604431	0.850934	3.21248	10.5502	0.00116176	0.0677739	ENSG00000169519	1	5	55	38	34	105	44	159	69	127	117	157	-	-	-	+	-	+	+	+	+	+
chr13	94731778	94732437	-0.832138	3.5358	10.5534	0.00115972	0.0677739	ENSG00000088451	5	5	90	57	99	239	168	141	83	82	81	53	+	+	+	+	+	+	+	+	+	+
chr6	126110883	126113026	0.489045	6.89077	10.5515	0.00116095	0.0677739	ENSG00000111912	5	5	723	646	606	1681	732	1965	1152	1337	1147	1836	+	+	+	+	+	+	+	+	+	+
chr3	187871322	187872383	0.518612	5.68841	10.5476	0.00116342	0.0677955	ENSG00000145012	5	5	388	352	472	641	228	514	727	539	384	638	+	+	+	+	+	+	+	+	+	+
chr5	45695130	45696769	0.484086	6.45178	10.5415	0.00116727	0.0679439	ENSG00000112996	5	5	563	515	524	1104	566	1253	929	1044	786	1280	+	+	+	+	+	+	+	+	+	+
chr4	99579152	99580409	0.522179	6.18396	10.5349	0.00117143	0.0679823	ENSG00000168785	5	5	539	396	352	1019	401	1126	803	809	698	1036	+	+	+	+	+	+	+	+	+	+
chr4	100867342	100868318	0.506722	6.01159	10.5343	0.00117182	0.0679823	ENSG00000164031	5	5	426	361	338	963	324	1102	725	787	520	901	+	+	+	+	+	+	+	+	+	+
chr3	75683611	75684145	-0.94851	3.29722	10.5373	0.00116989	0.0679823	ENSG00000242516	4	4	173	87	91	71	110	94	41	70	40	99	+	+	+	-	+	+	-	+	+	+
chr9	68697911	68698187	-1.23098	1.51148	10.531	0.00117386	0.0680253	ENSG00000147996	3	1	52	37	34	28	18	20	13	9	9	22	+	+	+	-	-	-	+	-	-	-
chr9	102442397	102442749	-1.04897	2.43098	10.5267	0.00117662	0.0681103	ENSG00000119508	4	2	42	46	60	108	47	59	26	45	14	56	-	+	+	+	+	+	-	+	-	-
chr13	40738123	40738770	-0.80249	4.00245	10.5175	0.0011825	0.0683335	ENSG00000150907	5	5	216	115	172	204	162	159	116	128	55	146	+	+	+	+	+	+	+	+	+	+
chr10	13570333	13571507	0.639236	4.78334	10.5166	0.00118309	0.0683335	ENSG00000165626	1	5	176	160	133	424	120	260	448	439	168	359	-	-	-	+	-	+	+	+	+	+
chr18	33876622	33878430	0.686349	5.24887	10.5053	0.00119035	0.0685075	ENSG00000134775	5	5	235	246	150	548	154	597	418	388	439	583	+	+	+	+	+	+	+	+	+	+
chr16	48418412	48419799	0.564613	5.43851	10.4956	0.00119656	0.0685075	ENSG00000196470	5	5	381	263	314	610	155	331	666	583	228	639	+	+	+	+	+	+	+	+	+	+
chr8	27198020	27198602	0.898091	3.21946	10.5025	0.00119216	0.0685075	ENSG00000120899	2	5	54	36	59	94	43	201	109	110	107	86	-	-	+	+	-	+	+	+	+	+
chr18	45935228	45937236	0.502983	6.27106	10.509	0.00118794	0.0685075	ENSG00000134030	5	5	462	549	454	969	458	964	893	1039	674	1026	+	+	+	+	+	+	+	+	+	+
chr3	113666219	113667563	0.514259	6.30486	10.4976	0.00119527	0.0685075	ENSG00000184307	5	5	528	469	467	1016	497	889	897	1060	654	1214	+	+	+	+	+	+	+	+	+	+
chr3	123065440	123066022	0.878996	3.13748	10.4978	0.00119518	0.0685075	ENSG00000173175	1	5	40	32	36	58	59	220	56	86	177	77	-	-	-	-	+	+	+	+	+	+
chr6	141178782	141179972	-0.681353	4.99586	10.4966	0.00119597	0.0685075	ENSG00000009844	5	5	222	257	302	415	470	347	218	275	154	306	+	+	+	+	+	+	+	+	+	+
chr8	49309197	49310109	0.758897	3.90356	10.5039	0.00119122	0.0685075	ENSG00000169139	3	5	123	86	59	125	74	269	153	154	117	307	+	+	-	+	-	+	+	+	+	+
chr2	239228665	239229716	0.582575	5.15554	10.4919	0.001199	0.0685723	ENSG00000204104	5	5	272	221	265	412	159	387	393	587	251	490	+	+	+	+	+	+	+	+	+	+
chr2	112811752	112813716	0.514582	7.45516	10.4803	0.00120652	0.0688522	ENSG00000153214	5	5	1217	1216	1027	2157	989	1942	1826	2428	1656	2515	+	+	+	+	+	+	+	+	+	+
chr3	97654587	97655125	-0.714018	4.069	10.4803	0.00120653	0.0688522	ENSG00000170854	5	5	174	142	164	269	150	167	149	164	56	133	+	+	+	+	+	+	+	+	+	+
chr12	31387934	31388704	0.615974	5.07819	10.4768	0.00120884	0.0688689	ENSG00000139146	5	5	117	139	129	553	224	654	260	369	549	381	+	+	+	+	+	+	+	+	+	+
chr2	204362778	204363321	-0.764124	3.88507	10.4759	0.00120945	0.0688689	ENSG00000173166	5	5	110	190	120	174	204	100	106	113	72	140	+	+	+	+	+	+	+	+	+	+
chr11	61658567	61659673	0.618798	5.57232	10.471	0.00121264	0.068901	ENSG00000221968	5	5	398	276	478	472	200	440	544	837	310	549	+	+	+	+	+	+	+	+	+	+
chr2	216946027	216947236	0.543527	5.31179	10.4729	0.00121138	0.068901	ENSG00000163449	5	5	236	214	214	544	234	611	382	505	381	606	+	+	+	+	+	+	+	+	+	+
chr5	106160745	106161528	-0.825834	3.72437	10.4629	0.00121795	0.0691275	ENSG00000184349	5	5	135	88	123	159	200	137	61	84	92	128	+	+	+	+	+	+	+	+	+	+
chr1	193982869	193983554	-1.15244	3.02351	10.4589	0.00122059	0.0692026	ENSG00000162630	3	2	63	113	99	63	129	42	56	55	13	72	-	+	+	-	+	-	-	+	-	+
chr4	8160107	8161219	0.497786	6.16298	10.4541	0.00122376	0.0693072	ENSG00000163995	5	5	488	455	409	892	395	1061	692	967	658	1011	+	+	+	+	+	+	+	+	+	+
chr9	77555518	77555903	-1.14421	2.66306	10.4455	0.00122951	0.0695578	ENSG00000135045	3	3	43	67	15	120	74	167	34	33	39	21	-	+	-	+	+	+	-	+	+	-
chr10	83634037	83635042	0.602316	4.89026	10.4403	0.00123295	0.0696772	ENSG00000108219	5	5	190	144	178	423	161	356	322	401	237	505	+	+	+	+	+	+	+	+	+	+
chr11	97957944	97958784	0.858424	3.62309	10.4276	0.00124147	0.0698365	ENSG00000149972	2	5	40	49	24	121	96	269	98	61	278	150	-	-	-	+	+	+	+	+	+	+
chr7	149411461	149412483	0.550292	5.42776	10.43	0.00123987	0.0698365	ENSG00000133619	5	5	312	339	321	489	178	459	512	629	306	574	+	+	+	+	+	+	+	+	+	+
chr8	66422903	66423472	1.0039	2.71773	10.4286	0.00124078	0.0698365	ENSG00000104442	0	5	41	21	39	32	43	141	57	40	134	60	-	-	-	-	-	+	+	+	+	+
chr21	9431654	9432448	-0.943466	3.40717	10.4242	0.00124377	0.0698365	ENSG00000188681	2	3	155	118	137	119	77	59	53	43	31	157	-	+	-	+	-	+	+	-	-	+
chr4	125963210	125963595	-1.21532	2.42947	10.429	0.00124052	0.0698365	ENSG00000151458	4	1	41	49	97	68	63	35	32	46	9	34	-	+	+	+	+	-	-	+	-	-
chr17	21555364	21556057	-0.959981	3.67474	10.4261	0.0012425	0.0698365	ENSG00000212719	5	1	180	113	138	138	149	123	84	45	49	130	+	+	+	+	+	+	-	-	-	-
chr6	145525441	145526234	-0.730616	3.84314	10.4195	0.00124689	0.0699366	ENSG00000112425	5	5	131	99	133	248	152	181	70	110	104	127	+	+	+	+	+	+	+	+	+	+
chr2	167350422	167351099	0.781565	3.71597	10.4042	0.00125727	0.0704435	ENSG00000169432	2	5	96	52	71	144	72	217	202	144	101	172	-	-	+	+	-	+	+	+	+	+
chr3	163460700	163461151	-0.917964	2.64367	10.3996	0.00126042	0.0705447	ENSG00000114200	4	4	47	58	35	98	103	44	42	67	31	42	-	+	+	+	+	+	+	+	+	-
chr14	56656045	56656455	-0.955565	2.60555	10.3964	0.00126265	0.0705936	ENSG00000139946	4	2	57	65	77	72	73	27	53	59	18	32	-	+	+	+	+	-	+	+	-	-
chr3	133645894	133646806	0.802908	3.50689	10.3864	0.00126948	0.0706439	ENSG00000154917	3	5	69	61	66	150	39	197	138	128	112	146	-	+	+	+	-	+	+	+	+	+
chr6	125622504	125623272	0.545342	5.38367	10.3888	0.00126784	0.0706439	ENSG00000111906	5	5	311	248	228	565	193	671	460	442	350	658	+	+	+	+	+	+	+	+	+	+
chr2	209407082	209407785	-0.868725	3.76553	10.3886	0.00126795	0.0706439	ENSG00000144407	5	5	140	93	152	182	168	141	88	131	46	114	+	+	+	+	+	+	+	+	+	+
chr1	142952044	142952659	-1.27849	2.26308	10.3838	0.00127125	0.0706439	ENSG00000196369	4	0	87	53	84	51	23	36	35	16	5	24	+	+	+	+	-	-	-	-	-	-
chr2	184676807	184677151	-0.940579	2.58738	10.3813	0.00127298	0.0706439	ENSG00000163002	2	4	36	49	54	93	105	49	52	49	27	26	-	-	-	+	+	+	+	+	+	-
chr8	17353964	17355158	0.53154	5.6187	10.3863	0.0012695	0.0706439	ENSG00000003989	5	5	345	293	303	678	239	614	512	623	386	838	+	+	+	+	+	+	+	+	+	+
chr7	108224550	108225023	-1.00376	2.2538	10.3821	0.00127242	0.0706439	ENSG00000177683	3	1	51	64	43	74	36	44	27	31	22	36	-	+	+	+	-	+	-	-	-	-
chr8	56791803	56793273	0.535962	5.60266	10.3777	0.00127549	0.0707078	ENSG00000254087	5	5	343	252	301	731	237	777	602	513	440	589	+	+	+	+	+	+	+	+	+	+
chr13	63280151	63280567	-0.806815	3.62396	10.3749	0.0012774	0.0707393	ENSG00000197991	5	4	101	148	134	130	156	72	88	135	48	84	+	+	+	+	+	+	+	+	-	+
chr6	167444746	167445097	-1.21642	2.22915	10.3681	0.0012821	0.0707751	ENSG00000213066	3	2	55	37	60	83	39	40	17	57	16	20	+	-	+	+	-	+	-	+	-	-
chr10	118501544	118502965	0.536861	6.07121	10.3712	0.00127993	0.0707751	ENSG00000165868	5	5	402	448	394	954	344	884	758	841	679	850	+	+	+	+	+	+	+	+	+	+
chr14	48802396	48802987	-0.997087	2.293	10.3691	0.00128145	0.0707751	ENSG00000213741	3	1	55	90	50	32	57	21	29	27	24	28	+	+	-	-	+	-	+	-	-	-
chr8	126123068	126123491	-0.816166	3.29686	10.3611	0.00128696	0.0709685	ENSG00000164961	5	5	76	87	74	141	144	117	69	73	51	75	+	+	+	+	+	+	+	+	+	+
chr12	90604719	90605255	-0.649293	5.02276	10.352	0.00129334	0.0711094	ENSG00000070961	5	5	303	252	297	406	383	398	180	366	175	287	+	+	+	+	+	+	+	+	+	+
chr7	147755150	147755617	0.836582	4.07979	10.3554	0.00129098	0.0711094	ENSG00000055130	4	5	74	53	38	107	166	506	121	145	196	302	+	+	-	+	+	+	+	+	+	+
chr4	121375333	121375885	-1.01504	2.11763	10.3496	0.001295	0.0711094	ENSG00000164109	3	2	25	33	24	95	70	43	37	29	17	26	-	+	-	+	+	+	+	-	-	-
chr9	2720195	2720665	-1.0291	2.2894	10.3478	0.0012963	0.0711094	ENSG00000236404	3	2	31	50	36	79	64	70	24	42	28	24	-	+	-	+	+	+	-	+	-	-
chr5	58375778	58376337	-0.96311	3.77633	10.3516	0.00129363	0.0711094	ENSG00000152932	5	4	125	113	146	255	132	196	84	60	122	42	+	+	+	+	+	+	+	+	+	-
chr18	53274850	53275512	0.683107	4.46078	10.3455	0.00129791	0.0711163	ENSG00000196628	4	5	122	79	58	189	199	530	184	252	342	204	+	+	-	+	+	+	+	+	+	+
chr1	41706948	41708292	0.606249	4.66926	10.3437	0.00129915	0.0711163	ENSG00000010803	5	5	166	179	184	279	124	235	338	386	153	388	+	+	+	+	+	+	+	+	+	+
chr1	26855969	26856808	0.671979	4.50665	10.3404	0.00130151	0.0711618	ENSG00000117676	5	5	203	151	183	257	83	156	320	321	175	278	+	+	+	+	+	+	+	+	+	+
chr3	8542874	8543622	0.474513	6.45886	10.3387	0.00130269	0.0711618	ENSG00000071282	5	5	628	501	628	1131	474	1330	870	991	771	1300	+	+	+	+	+	+	+	+	+	+
chr10	108923827	108924721	0.784112	3.54723	10.3312	0.00130803	0.0713789	ENSG00000108039	2	5	65	62	60	136	58	170	183	183	91	116	-	+	-	+	-	+	+	+	+	+
chr5	125169017	125169575	-1.19713	2.26974	10.3257	0.00131191	0.0714417	ENSG00000155324	2	2	49	23	42	75	66	84	15	18	20	58	-	-	-	+	+	+	-	-	-	+
chr8	69721035	69721418	-0.871556	2.90307	10.3266	0.00131125	0.0714417	ENSG00000137573	4	3	40	67	49	177	95	60	76	57	25	58	-	+	+	+	+	+	+	+	-	-
chr4	36720	37192	-1.10185	2.65155	10.3219	0.00131461	0.0714846	ENSG00000250312	3	0	111	46	73	64	68	58	43	35	18	39	+	-	-	+	+	-	-	-	-	-
chr21	9593428	9593955	-1.38946	2.23873	10.3208	0.00131543	0.0714846	ENSG00000188681	3	0	94	38	67	61	37	28	30	4	8	45	+	-	+	+	-	-	-	-	-	-
chr6	122007687	122008165	1.20222	1.75495	10.3136	0.0013205	0.0716311	ENSG00000152661	0	4	17	14	20	19	15	56	52	36	16	66	-	-	-	-	-	+	+	+	-	+
chr1	84326041	84327022	0.491493	6.04288	10.3132	0.00132085	0.0716311	ENSG00000137941	5	5	595	417	475	737	280	971	534	687	635	1075	+	+	+	+	+	+	+	+	+	+
chr11	100660247	100660791	-1.12914	2.68111	10.3077	0.00132473	0.0717672	ENSG00000165895	5	3	60	46	63	83	89	81	24	55	17	74	+	+	+	+	+	+	-	+	-	+
chr7	79251852	79252668	-0.756517	3.7171	10.3025	0.00132847	0.0718954	ENSG00000187391	5	5	135	138	95	155	165	105	58	111	113	113	+	+	+	+	+	+	+	+	+	+
chr6	105837291	105837942	0.854714	3.41987	10.295	0.00133394	0.0721167	ENSG00000085377	2	4	52	26	37	114	68	239	67	147	115	210	-	-	-	+	+	+	-	+	+	+
chr1	162530669	162532251	0.477662	6.79431	10.288	0.00133898	0.0721656	ENSG00000117143	5	5	922	877	844	1192	518	1214	1294	1337	833	1541	+	+	+	+	+	+	+	+	+	+
chr3	71834008	71834614	0.844796	3.06084	10.2905	0.00133713	0.0721656	ENSG00000163412	1	5	48	46	48	82	52	76	110	92	87	138	-	-	-	+	-	+	+	+	+	+
chr4	9270136	9270407	-2.5153	0.95907	10.2885	0.00133861	0.0721656	ENSG00000109667	3	1	46	5	37	6	15	38	1	1	8	4	+	-	+	-	+	+	-	-	-	-
chr5	121412445	121414120	0.595245	5.06069	10.276	0.00134772	0.0722653	ENSG00000113083	5	5	191	236	158	400	194	512	397	334	339	485	+	+	+	+	+	+	+	+	+	+
chr5	52283552	52284045	-0.734593	3.90315	10.2805	0.00134444	0.0722653	ENSG00000164171	5	1	131	139	256	263	102	76	139	62	72	105	+	+	+	+	+	-	+	-	-	-
chr18	24443055	24443805	0.67453	4.60423	10.2761	0.00134766	0.0722653	ENSG00000171885	5	5	129	125	103	413	114	343	260	273	274	381	+	+	+	+	+	+	+	+	+	+
chr21	29680810	29681255	-0.999037	2.41616	10.278	0.00134625	0.0722653	ENSG00000156239	5	2	74	30	68	85	63	27	39	22	31	32	+	+	+	+	+	-	+	-	+	-
chr12	49607488	49608033	-0.75412	3.67376	10.2794	0.00134527	0.0722653	ENSG00000167552	5	5	112	99	107	184	163	173	71	86	93	100	+	+	+	+	+	+	+	+	+	+
chr21	41005607	41006093	-0.797515	3.39461	10.2725	0.00135026	0.0723018	ENSG00000184809	4	4	115	83	71	193	97	137	64	107	53	79	+	+	-	+	+	+	+	+	-	+
chr20	57570946	57571406	-0.926543	2.64525	10.2713	0.00135116	0.0723018	ENSG00000101160	2	3	56	73	39	87	72	64	22	60	47	49	+	-	-	-	+	-	-	+	+	+
chr6	128417307	128417650	-1.08909	2.68262	10.2634	0.00135695	0.0724201	ENSG00000152894	4	0	28	80	73	61	129	39	41	47	20	40	-	+	+	+	+	-	-	-	-	-
chr4	66282486	66283141	0.647042	4.88419	10.2626	0.00135752	0.0724201	ENSG00000145241	5	5	196	142	103	200	240	772	271	357	277	384	+	+	+	+	+	+	+	+	+	+
chr13	35293516	35293865	-1.17641	1.94287	10.263	0.00135721	0.0724201	ENSG00000172915	3	1	48	33	42	41	49	38	13	34	19	20	+	-	+	-	+	-	-	-	+	-
chr3	185525421	185525807	-0.970081	2.85831	10.2535	0.00136425	0.0725576	ENSG00000073792	5	1	79	77	79	93	87	31	43	48	26	82	+	+	+	+	+	-	-	-	-	+
chr7	155382941	155383598	0.769316	3.86903	10.2571	0.00136162	0.0725576	ENSG00000184863	4	5	99	59	47	118	94	301	104	245	184	181	+	+	-	+	+	+	+	+	+	+
chr5	128429827	128431108	0.485821	7.38126	10.2542	0.00136377	0.0725576	ENSG00000066583	5	5	1176	1071	960	2283	850	2349	1716	2038	1486	2480	+	+	+	+	+	+	+	+	+	+
chr3	134320870	134321594	0.711908	4.13691	10.2443	0.00137105	0.0726977	ENSG00000129055	4	5	106	75	65	191	99	348	118	268	230	241	+	+	-	+	+	+	+	+	+	+
chr4	183837906	183839411	0.511342	6.13365	10.246	0.00136983	0.0726977	ENSG00000129187	5	5	489	416	345	1037	349	1092	807	837	569	1043	+	+	+	+	+	+	+	+	+	+
chr19	4968619	4969394	0.563736	5.93688	10.2448	0.00137069	0.0726977	ENSG00000127663	5	5	498	449	606	685	239	468	760	871	484	666	+	+	+	+	+	+	+	+	+	+
chr7	76589058	76589382	2.05342	1.07491	10.2385	0.00137542	0.0728553	ENSG00000135205	0	3	1	1	1	5	2	86	2	56	2	47	-	-	-	-	-	+	-	+	-	+
chr7	97910085	97911527	0.520867	5.91649	10.2118	0.00139545	0.072869	ENSG00000164713	5	5	459	396	411	825	252	685	775	900	402	763	+	+	+	+	+	+	+	+	+	+
chr20	29618582	29619308	-0.820712	3.85293	10.2101	0.00139675	0.072869	ENSG00000101294	5	4	200	160	181	143	128	96	116	69	44	143	+	+	+	+	+	+	+	+	-	+
chr11	87748371	87748906	-0.951647	2.98056	10.2354	0.00137771	0.072869	ENSG00000123892	3	1	65	58	92	148	86	99	61	54	34	35	-	-	+	+	+	-	-	+	-	-
chr9	95980055	95980464	-1.18116	1.77858	10.2275	0.0013836	0.072869	ENSG00000165238	3	0	43	24	70	63	19	14	24	20	8	13	+	-	+	+	-	-	-	-	-	-
chr13	42613904	42616083	0.495943	6.69277	10.2197	0.0013895	0.072869	ENSG00000102780	5	5	633	710	596	1370	571	1550	1185	1212	951	1348	+	+	+	+	+	+	+	+	+	+
chr6	121364410	121365389	-0.592851	5.59596	10.2142	0.00139367	0.072869	ENSG00000146350	5	5	399	357	300	824	508	767	241	495	476	295	+	+	+	+	+	+	+	+	+	+
chr6	130786805	130788116	-0.627331	4.69203	10.2205	0.00138886	0.072869	ENSG00000164484	5	5	260	262	273	305	233	300	151	205	141	258	+	+	+	+	+	+	+	+	+	+
chr5	106179445	106180047	0.931476	2.57822	10.2184	0.00139046	0.072869	ENSG00000184349	0	4	37	25	30	49	35	94	60	49	71	113	-	-	-	-	-	+	+	-	+	+
chr3	37254481	37254961	-0.769014	3.50832	10.2219	0.00138784	0.072869	ENSG00000093167	5	5	95	102	96	184	132	114	58	96	84	93	+	+	+	+	+	+	+	+	+	+
chr11	12854439	12854716	-1.15764	2.42622	10.2261	0.00138467	0.072869	ENSG00000187079	3	0	65	61	54	36	97	34	39	22	15	37	+	+	-	-	+	-	-	-	-	-
chr5	100107731	100108903	-0.646081	4.42167	10.2085	0.00139793	0.072869	ENSG00000113532	5	5	196	149	149	381	260	246	165	163	122	207	+	+	+	+	+	+	+	+	+	+
chr2	205398311	205399004	-0.803157	3.24643	10.2115	0.00139568	0.072869	ENSG00000116117	5	5	99	95	106	155	85	70	71	51	66	58	+	+	+	+	+	+	+	+	+	+
chr9	68400210	68400520	-0.905985	3.00093	10.2244	0.00138592	0.072869	ENSG00000170161	4	1	145	79	86	88	63	49	56	39	27	76	+	+	+	+	-	-	-	-	-	+
chr7	84580110	84580601	-0.765059	3.94432	10.2105	0.00139645	0.072869	ENSG00000170381	5	5	147	96	111	257	203	179	97	138	70	164	+	+	+	+	+	+	+	+	+	+
chr6	146864241	146865621	0.498287	6.23259	10.2159	0.00139234	0.072869	ENSG00000118508	5	5	608	389	506	1159	325	1016	853	956	566	1044	+	+	+	+	+	+	+	+	+	+
chr4	39516360	39517032	-0.638413	4.67347	10.2322	0.00138008	0.072869	ENSG00000249348	5	5	176	231	225	423	287	261	147	258	194	188	+	+	+	+	+	+	+	+	+	+
chr11	22532398	22532669	-1.19991	3.22472	10.1931	0.00140965	0.0729988	ENSG00000148935	5	4	83	95	103	105	159	64	77	39	17	87	+	+	+	+	+	+	+	+	-	+
chr3	179246567	179246840	-1.01551	2.40196	10.1937	0.00140924	0.0729988	ENSG00000136518	5	2	60	55	54	79	51	30	22	56	24	42	+	+	+	+	+	-	-	+	-	+
chr1	6672896	6674230	0.64017	6.91286	10.2001	0.00140436	0.0729988	ENSG00000116273	5	5	1037	786	754	1784	384	1003	1887	1700	827	1458	+	+	+	+	+	+	+	+	+	+
chr6	58179870	58180643	0.890083	2.96627	10.1944	0.00140868	0.0729988	ENSG00000215190	2	5	37	33	14	101	45	153	100	93	85	103	-	-	-	+	+	+	+	+	+	+
chr15	94913369	94914128	-0.871376	3.37163	10.1888	0.00141296	0.0729988	ENSG00000140563	5	4	108	84	77	170	122	84	47	92	50	132	+	+	+	+	+	+	-	+	+	+
chr2	214883894	214884588	-0.597193	4.76109	10.1928	0.00140993	0.0729988	ENSG00000144451	5	5	236	270	253	382	266	262	149	230	208	253	+	+	+	+	+	+	+	+	+	+
chr10	35624898	35626445	0.581452	5.40402	10.1918	0.00141068	0.0729988	ENSG00000108100	5	5	353	250	216	597	190	491	565	475	327	668	+	+	+	+	+	+	+	+	+	+
chr6	138409435	138409705	-0.850123	3.24831	10.1897	0.00141227	0.0729988	ENSG00000112378	5	3	97	87	102	121	114	83	63	65	39	90	+	+	+	+	+	+	+	+	-	-
chr18	72942103	72942723	-0.781432	3.49024	10.2011	0.0014036	0.0729988	ENSG00000179981	4	3	83	110	75	192	130	134	72	100	49	118	+	+	-	+	+	+	-	+	-	+
chr5	113483687	113484659	-0.690356	4.80401	10.1848	0.00141602	0.0730846	ENSG00000047188	5	5	215	213	157	571	318	324	151	272	298	147	+	+	+	+	+	+	+	+	+	+
chr5	6582726	6583877	0.568721	4.97824	10.1736	0.00142465	0.0733097	ENSG00000250056	5	5	171	187	145	406	165	646	282	375	308	474	+	+	+	+	+	+	+	+	+	+
chr10	51815323	51815628	-1.51161	1.54217	10.1719	0.00142597	0.0733097	ENSG00000099290	2	2	23	10	12	41	45	78	3	40	10	9	-	-	-	+	+	+	-	+	-	-
chr10	79769926	79770415	-1.03152	2.43509	10.1745	0.00142395	0.0733097	ENSG00000148606	4	2	45	43	50	102	55	60	19	50	20	61	-	+	+	+	+	+	-	+	-	-
chr14	45558876	45559494	-0.8851	2.90455	10.1735	0.00142476	0.0733097	ENSG00000185246	3	2	71	58	87	131	75	73	43	44	34	75	-	-	+	+	+	+	-	-	-	+
chr5	133161306	133161749	0.723083	3.94949	10.166	0.00143055	0.0734726	ENSG00000113583	3	5	77	40	46	237	106	352	168	178	147	216	+	-	-	+	+	+	+	+	+	+
chr1	167522368	167523462	0.495787	6.10254	10.1596	0.00143553	0.0736562	ENSG00000143162	5	5	504	490	488	759	380	805	755	755	561	1105	+	+	+	+	+	+	+	+	+	+
chr7	140372597	140373641	0.522478	5.59597	10.1563	0.00143807	0.0737144	ENSG00000133597	5	5	323	331	292	640	229	661	525	615	399	719	+	+	+	+	+	+	+	+	+	+
chr5	24112556	24112975	-0.984602	2.49772	10.1512	0.00144204	0.0737741	ENSG00000040731	5	1	42	46	56	81	92	59	44	30	29	27	+	+	+	+	+	-	+	-	-	-
chr17	4401755	4402461	0.825602	3.74824	10.1507	0.00144244	0.0737741	ENSG00000183018	4	5	97	83	133	134	44	90	180	247	95	147	+	+	+	+	-	+	+	+	+	+
chr12	18621279	18622311	-0.709136	4.3724	10.1494	0.00144346	0.0737741	ENSG00000139144	5	5	178	197	179	342	236	211	176	88	130	184	+	+	+	+	+	+	+	+	+	+
chr9	89560820	89562898	0.503641	5.93879	10.1453	0.00144671	0.0738355	ENSG00000196730	5	5	437	390	419	850	293	817	721	656	530	858	+	+	+	+	+	+	+	+	+	+
chr5	108760534	108760762	-1.02074	2.26238	10.1443	0.00144748	0.0738355	ENSG00000198961	4	1	60	51	50	59	48	34	27	35	14	48	+	+	+	+	-	-	-	-	-	+
chr4	27315	28308	-0.989344	3.11061	10.1404	0.00145054	0.0738481	ENSG00000250312	4	3	157	65	85	105	71	78	67	58	16	81	+	+	+	+	-	-	+	+	-	+
chr1	76005161	76005612	-1.07612	2.33309	10.1415	0.0014497	0.0738481	ENSG00000137968	3	3	59	35	35	82	65	46	15	50	42	27	-	+	-	+	+	+	-	+	+	-
chr2	60643378	60643905	-0.993512	2.70456	10.1368	0.0014534	0.0738866	ENSG00000119866	3	1	78	59	99	131	26	25	93	28	6	41	+	-	+	+	-	-	+	-	-	-
chr1	249131985	249133345	0.500598	7.30988	10.1359	0.00145412	0.0738866	ENSG00000171161	5	5	1171	1232	1076	1630	877	1603	1564	2193	1303	2551	+	+	+	+	+	+	+	+	+	+
chr9	20611767	20612323	-0.627716	4.64626	10.1325	0.00145676	0.0739489	ENSG00000171843	5	5	180	241	183	327	349	284	173	200	149	243	+	+	+	+	+	+	+	+	+	+
chr1	142722046	142722378	-1.2592	1.88683	10.1232	0.00146418	0.0741102	ENSG00000196369	4	1	37	46	34	28	58	39	15	21	9	35	+	+	-	+	+	+	-	-	-	-
chr2	149502833	149503125	-1.02605	2.17356	10.124	0.00146353	0.0741102	ENSG00000135999	3	1	40	46	58	67	47	41	24	20	27	30	-	+	+	-	+	-	-	-	+	-
chr6	130768500	130769053	-0.912885	2.82987	10.1239	0.00146356	0.0741102	ENSG00000164484	4	3	76	51	55	105	90	70	22	44	62	76	+	-	+	+	+	+	-	-	+	+
chr15	55571794	55572584	-0.793533	3.34492	10.121	0.00146589	0.074125	ENSG00000069943	4	4	108	87	88	175	96	90	59	102	50	91	+	+	+	+	-	+	-	+	+	+
chr7	53223401	53223629	-1.33041	1.5402	10.1039	0.00147958	0.0741827	ENSG00000170419	4	0	40	31	48	19	36	21	12	5	11	20	+	+	+	-	+	-	-	-	-	-
chr12	41223482	41223899	-0.804323	3.45267	10.1134	0.00147192	0.0741827	ENSG00000018236	5	3	117	87	125	147	115	133	59	58	74	87	+	+	+	+	+	+	-	-	+	+
chr10	51488761	51489787	0.639698	4.80125	10.1095	0.00147509	0.0741827	ENSG00000204152	5	5	180	143	176	384	117	511	279	330	324	296	+	+	+	+	+	+	+	+	+	+
chr16	50775400	50776493	0.512599	6.47111	10.1118	0.00147326	0.0741827	ENSG00000083799	5	5	749	573	767	1019	438	715	1043	1232	697	1154	+	+	+	+	+	+	+	+	+	+
chr2	38589438	38589771	-0.986677	2.15215	10.1127	0.00147254	0.0741827	ENSG00000119787	4	0	40	45	30	72	56	40	23	37	28	29	+	+	-	+	+	-	-	-	-	-
chr18	1848623	1849042	-1.01652	2.72866	10.1024	0.00148075	0.0741827	ENSG00000101574	4	3	39	82	85	93	84	23	49	62	16	54	-	+	+	+	+	-	+	+	-	+
chr12	6419294	6420443	0.6468	4.59755	10.0986	0.00148386	0.0741827	ENSG00000008323	5	5	169	172	147	241	108	320	207	392	241	334	+	+	+	+	+	+	+	+	+	+
chr14	25409206	25409832	-0.973851	2.60869	10.1077	0.00147649	0.0741827	ENSG00000168952	3	1	63	46	66	96	57	100	27	29	37	44	-	-	+	+	+	+	-	-	-	-
chr5	19179628	19180697	-0.564181	4.99272	10.0983	0.00148402	0.0741827	ENSG00000145526	5	5	241	197	196	512	338	680	129	239	297	309	+	+	+	+	+	+	+	+	+	+
chr9	36486805	36488338	0.533048	5.96195	10.1122	0.00147288	0.0741827	ENSG00000137075	5	5	395	376	367	934	323	654	752	922	470	916	+	+	+	+	+	+	+	+	+	+
chr4	156827657	156828259	-1.00623	2.95011	10.101	0.00148186	0.0741827	ENSG00000256043	4	2	42	95	112	109	101	30	47	49	30	67	-	+	+	+	+	-	-	+	-	+
chr4	1794544	1795357	0.827849	3.66779	10.1058	0.00147803	0.0741827	ENSG00000068078	0	4	116	92	56	90	55	95	241	237	76	117	-	-	-	-	-	+	+	+	-	+
chr3	117572702	117573284	-0.638218	4.7199	10.0963	0.00148566	0.0741936	ENSG00000185565	5	5	193	255	243	351	358	169	153	245	224	193	+	+	+	+	+	+	+	+	+	+
chr3	182510722	182512231	0.510657	6.13423	10.0904	0.00149046	0.0743626	ENSG00000058063	5	5	535	389	378	1067	332	1024	810	764	560	1115	+	+	+	+	+	+	+	+	+	+
chr17	68851497	68852037	-0.731262	3.98126	10.0881	0.0014923	0.0743834	ENSG00000123700	5	5	139	131	119	208	218	167	95	165	79	147	+	+	+	+	+	+	+	+	+	+
chr5	113390773	113392076	0.599135	4.88445	10.0849	0.0014949	0.0744421	ENSG00000047188	5	5	166	202	141	377	147	511	319	328	292	426	+	+	+	+	+	+	+	+	+	+
chr19	8657092	8657849	0.861635	3.19736	10.0792	0.00149953	0.0745313	ENSG00000142303	1	4	96	53	100	57	31	70	160	113	48	102	-	-	+	-	-	+	+	+	-	+
chr3	2564978	2565546	-0.722959	3.94509	10.0795	0.00149926	0.0745313	ENSG00000144619	5	5	123	138	123	203	216	163	79	83	134	151	+	+	+	+	+	+	+	+	+	+
chr12	53440395	53441671	0.551071	5.78466	10.0764	0.00150181	0.0745739	ENSG00000111077	5	5	495	348	426	575	252	591	647	897	398	625	+	+	+	+	+	+	+	+	+	+
chr5	6712228	6714815	0.468567	7.35302	10.063	0.00151278	0.0750472	ENSG00000112941	5	5	1083	1065	950	2231	918	2161	2070	2050	1151	2373	+	+	+	+	+	+	+	+	+	+
chr5	103767553	103768104	1.31324	3.01223	10.0596	0.00151553	0.0751126	ENSG00000112874	1	5	56	36	28	24	53	132	88	54	68	235	-	-	-	-	+	+	+	+	+	+
chr6	119805687	119806129	-1.09424	2.19656	10.0555	0.00151892	0.0751535	ENSG00000111885	3	0	33	39	57	89	51	44	43	21	11	27	-	-	+	+	+	-	-	-	-	-
chr2	86930921	86932059	-0.711049	4.02165	10.0552	0.00151922	0.0751535	ENSG00000153561	5	4	162	149	165	232	146	197	107	143	70	146	+	+	+	+	+	+	+	+	-	+
chr22	23522431	23523412	0.714641	4.56982	10.0482	0.00152497	0.0752402	ENSG00000186716	5	5	230	132	150	258	101	155	351	387	176	296	+	+	+	+	+	+	+	+	+	+
chr13	102398985	102399882	-0.563558	5.09044	10.0461	0.00152672	0.0752402	ENSG00000198542	5	5	270	254	200	476	474	447	196	349	298	247	+	+	+	+	+	+	+	+	+	+
chr6	109629331	109629621	-0.985051	2.52326	10.0471	0.0015259	0.0752402	ENSG00000203799	3	1	63	43	111	139	16	13	68	27	9	28	-	+	+	+	-	-	+	-	-	-
chr5	133339665	133341414	0.509936	6.04743	10.0472	0.00152579	0.0752402	ENSG00000213585	5	5	467	455	374	891	308	892	719	868	541	973	+	+	+	+	+	+	+	+	+	+
chr15	32969361	32969799	-0.749824	3.67443	10.0417	0.0015304	0.0752798	ENSG00000166922	5	5	84	109	80	196	181	170	61	130	91	100	+	+	+	+	+	+	+	+	+	+
chr6	101461564	101462067	-0.742276	4.00062	10.0433	0.00152907	0.0752798	ENSG00000112249	5	5	120	218	148	122	240	116	89	149	91	116	+	+	+	+	+	+	+	+	+	+
chr8	38796020	38796337	1.15907	1.99528	10.0348	0.00153611	0.0754791	ENSG00000169499	0	3	15	18	22	50	9	60	40	52	62	42	-	-	-	-	-	-	+	+	+	-
chr4	178723238	178724120	-0.780183	3.59244	10.0333	0.00153733	0.0754791	ENSG00000251504	2	4	127	79	118	203	113	189	60	54	91	106	+	-	-	+	-	+	+	-	+	+
chr18	29258945	29259659	-0.668228	4.25694	10.0303	0.00153987	0.0755329	ENSG00000118276	5	5	167	184	172	322	179	224	135	105	132	170	+	+	+	+	+	+	+	+	+	+
chr3	95985476	95986150	-0.91921	2.76415	10.0063	0.00156009	0.0756273	ENSG00000113966	3	2	50	60	102	169	40	42	56	34	20	57	-	+	+	+	-	-	+	-	-	+
chr12	16063821	16065088	0.500878	5.92574	10.0041	0.00156189	0.0756273	ENSG00000023697	5	5	429	330	306	872	313	1064	589	673	582	905	+	+	+	+	+	+	+	+	+	+
chr14	32492114	32492588	-1.05199	1.96592	10.0068	0.00155966	0.0756273	ENSG00000100852	2	2	27	36	19	66	51	58	15	42	19	27	-	-	-	+	+	+	-	+	-	-
chr19	33864145	33865437	0.557849	5.23187	10.0103	0.00155667	0.0756273	ENSG00000153879	5	5	278	264	302	485	139	323	490	569	215	543	+	+	+	+	+	+	+	+	+	+
chr6	80381337	80381902	-0.634633	4.31247	10.0084	0.00155826	0.0756273	ENSG00000198478	5	5	186	185	197	297	195	190	158	153	103	175	+	+	+	+	+	+	+	+	+	+
chr6	159495317	159495618	0.914198	2.7768	10.0055	0.00156071	0.0756273	ENSG00000130363	0	5	34	40	30	37	53	130	83	79	60	102	-	-	-	-	-	+	+	+	+	+
chr5	1523359	1524566	0.556098	4.96764	10.0111	0.00155597	0.0756273	ENSG00000153395	5	5	214	163	186	434	166	440	412	425	231	393	+	+	+	+	+	+	+	+	+	+
chr5	18375720	18376240	1.00181	3.52131	10.0141	0.0015535	0.0756273	ENSG00000176788	3	5	47	32	44	67	94	357	133	121	81	180	+	-	-	+	+	+	+	+	+	+
chr18	5510061	5510476	-0.806263	3.28105	10.0197	0.00154877	0.0756273	ENSG00000082397	5	4	101	96	108	121	103	90	58	68	50	84	+	+	+	+	+	+	-	+	+	+
chr2	191728401	191729147	0.572847	4.83581	10.004	0.001562	0.0756273	ENSG00000115419	5	5	107	111	89	363	211	802	182	297	367	400	+	+	+	+	+	+	+	+	+	+
chr6	40474652	40475194	-0.97221	3.64049	10.0219	0.00154686	0.0756273	ENSG00000156564	5	4	131	75	123	187	155	124	53	136	39	148	+	+	+	+	+	+	+	+	-	+
chr8	139508678	139509852	0.586352	4.78586	10.0212	0.00154747	0.0756273	ENSG00000147724	5	5	197	149	121	364	129	475	252	354	234	482	+	+	+	+	+	+	+	+	+	+
chr9	68403198	68403809	-0.996629	3.74691	10.022	0.00154681	0.0756273	ENSG00000170161	5	3	185	131	138	138	164	129	98	49	43	129	+	+	+	+	+	+	+	-	-	+
chr2	47167875	47169175	0.533385	5.53921	10.0108	0.00155627	0.0756273	ENSG00000180398	5	5	314	293	303	698	208	493	593	643	334	656	+	+	+	+	+	+	+	+	+	+
chr2	74211314	74212683	0.606234	4.6526	10.002	0.00156375	0.0756416	ENSG00000237883	3	5	228	177	186	238	116	184	433	305	134	346	+	-	-	+	+	+	+	+	+	+
chr1	190071981	190072464	-1.15274	1.97685	9.99992	0.00156547	0.0756551	ENSG00000090104	3	1	26	41	42	69	41	57	22	23	14	23	-	-	+	+	+	+	-	-	-	-
chr13	110146867	110147906	-0.56438	5.493	9.99495	0.0015697	0.0757424	ENSG00000185950	5	5	341	395	346	709	455	567	211	435	327	528	+	+	+	+	+	+	+	+	+	+
chr15	64636819	64637345	-0.939454	2.58592	9.99271	0.00157161	0.0757424	ENSG00000169118	4	2	60	52	34	95	89	48	37	43	30	59	+	+	-	+	+	+	-	-	-	+
chr4	69018206	69018596	-0.866001	3.05454	9.99418	0.00157036	0.0757424	ENSG00000083896	5	4	61	88	68	115	127	48	67	70	31	73	+	+	+	+	+	-	+	+	+	+
chr1	117909132	117910442	0.512319	6.13845	9.9875	0.00157606	0.0758175	ENSG00000198162	5	5	512	523	461	947	270	857	785	909	466	1175	+	+	+	+	+	+	+	+	+	+
chr7	113740776	113741252	-0.741148	3.6295	9.9888	0.00157495	0.0758175	ENSG00000128573	5	5	112	82	116	261	123	132	97	85	58	110	+	+	+	+	+	+	+	+	+	+
chr3	149160463	149161081	-0.69312	3.87216	9.98435	0.00157876	0.0758775	ENSG00000169903	5	5	157	117	122	214	158	151	74	94	139	122	+	+	+	+	+	+	+	+	+	+
chr14	105486864	105488121	0.531348	5.98453	9.9792	0.00158319	0.0759509	ENSG00000170779	5	5	508	368	431	841	289	608	769	1045	402	888	+	+	+	+	+	+	+	+	+	+
chr11	88422803	88423131	-1.06804	2.04497	9.98	0.0015825	0.0759509	ENSG00000109861	3	0	39	21	54	87	46	37	26	23	17	24	-	-	+	+	+	-	-	-	-	-
chr4	59988339	59988828	0.879826	3.48072	9.97579	0.00158612	0.0760219	ENSG00000163453	2	5	58	31	37	97	72	223	58	170	128	238	-	-	-	+	+	+	+	+	+	+
chr8	124852237	124852526	-1.02828	2.2105	9.97062	0.00159058	0.0760966	ENSG00000176853	4	2	34	51	36	75	69	22	26	36	23	40	-	+	+	+	+	-	-	+	-	+
chr6	129635639	129636229	0.688861	3.90163	9.97169	0.00158966	0.0760966	ENSG00000146376	3	5	58	62	48	166	128	315	138	215	172	174	+	-	-	+	+	+	+	+	+	+
chr20	29625578	29626414	-1.00547	3.6631	9.94984	0.00160863	0.0761923	ENSG00000101294	5	2	149	106	183	146	137	111	79	53	34	144	+	+	+	+	+	-	-	+	-	+
chr9	75172234	75172821	-0.819792	3.45018	9.95894	0.00160071	0.0761923	ENSG00000107372	5	4	118	100	161	190	77	72	110	57	48	51	+	+	+	+	+	+	+	+	+	-
chr12	28932827	28933348	-0.774613	3.82489	9.94389	0.00161384	0.0761923	ENSG00000064763	5	5	131	167	159	123	191	100	107	101	60	110	+	+	+	+	+	+	+	+	+	+
chr3	99807620	99807998	-0.862832	2.88443	9.95888	0.00160076	0.0761923	ENSG00000168386	5	3	83	87	59	103	68	80	45	50	48	46	+	+	+	+	+	+	-	-	+	+
chr3	172779702	172780517	-0.946637	3.15517	9.94629	0.00161174	0.0761923	ENSG00000114346	4	3	76	69	38	167	121	97	30	72	50	130	+	+	-	+	+	+	-	+	-	+
chr6	87922995	87923682	-0.647496	4.42335	9.93902	0.00161811	0.0761923	ENSG00000188994	5	5	208	235	233	265	200	206	144	130	126	209	+	+	+	+	+	+	+	+	+	+
chr8	49292876	49293403	0.891262	2.76576	9.94432	0.00161347	0.0761923	ENSG00000169139	3	4	47	48	72	57	22	56	98	51	55	114	-	+	+	+	-	-	+	+	+	+
chr11	34642249	34642911	-0.810535	3.47313	9.9449	0.00161296	0.0761923	ENSG00000135373	5	4	110	127	113	138	115	104	103	82	40	70	+	+	+	+	+	+	+	+	-	+
chr11	28637929	28638295	1.21472	1.71517	9.95515	0.001604	0.0761923	ENSG00000169519	0	3	27	23	13	14	10	61	39	26	48	33	-	-	-	-	-	+	+	-	+	-
chr12	41127671	41128079	-1.02452	2.50798	9.96337	0.00159685	0.0761923	ENSG00000018236	5	2	49	50	68	61	81	67	22	21	41	46	+	+	+	+	+	+	-	-	+	-
chr11	92761974	92762745	-0.60744	4.52895	9.95174	0.00160698	0.0761923	ENSG00000180773	5	5	222	197	114	331	253	388	127	189	178	213	+	+	+	+	+	+	+	+	+	+
chr6	143857563	143858774	0.545301	5.22708	9.95668	0.00160267	0.0761923	ENSG00000112419	5	5	269	207	210	511	213	491	478	401	322	546	+	+	+	+	+	+	+	+	+	+
chr9	10062510	10063115	-0.773336	3.50066	9.93873	0.00161837	0.0761923	ENSG00000153707	5	5	106	87	111	184	116	135	54	85	70	112	+	+	+	+	+	+	+	+	+	+
chr5	38871908	38872770	-0.805115	3.62905	9.95986	0.0015999	0.0761923	ENSG00000145623	4	4	106	108	207	237	79	71	152	59	34	69	+	+	+	+	-	+	+	+	-	+
chr4	57687522	57688021	0.736937	3.83482	9.93829	0.00161876	0.0761923	ENSG00000128040	5	5	108	81	81	105	80	252	154	163	104	254	+	+	+	+	+	+	+	+	+	+
chr22	25800694	25801527	0.671838	4.24798	9.96469	0.00159571	0.0761923	ENSG00000100068	5	5	115	97	119	255	117	156	279	252	192	216	+	+	+	+	+	+	+	+	+	+
chr5	10719928	10720327	-1.05789	2.25693	9.94131	0.0016161	0.0761923	ENSG00000112977	3	0	64	41	85	105	15	22	42	14	10	29	+	-	+	+	-	-	-	-	-	-
chr7	63767146	63768308	0.482862	7.02007	9.94193	0.00161556	0.0761923	ENSG00000234444	5	5	969	672	743	1414	926	1936	1173	1581	1302	1947	+	+	+	+	+	+	+	+	+	+
chr4	139019009	139019867	0.625446	4.98086	9.91953	0.00163535	0.0762621	ENSG00000151012	5	5	166	135	94	320	301	709	350	285	353	413	+	+	+	+	+	+	+	+	+	+
chr2	142943355	142943921	-0.905852	2.59838	9.93048	0.00162565	0.0762621	ENSG00000115919	2	3	66	46	60	113	55	65	42	41	23	49	-	-	-	+	+	+	+	+	-	-
chr10	59742941	59743649	-0.791795	3.45547	9.92363	0.0016317	0.0762621	ENSG00000151151	4	4	118	86	126	149	116	108	53	82	69	95	+	-	+	+	+	+	-	+	+	+
chr4	38664957	38666964	0.504291	6.94887	9.93459	0.00162202	0.0762621	ENSG00000109787	5	5	1080	819	770	1697	513	1332	1561	1579	871	1779	+	+	+	+	+	+	+	+	+	+
chr6	125282914	125284860	0.496121	6.58421	9.91967	0.00163522	0.0762621	ENSG00000146373	5	5	690	608	499	1261	521	1492	1029	997	912	1427	+	+	+	+	+	+	+	+	+	+
chr12	76307403	76308009	0.627516	4.29887	9.92837	0.00162751	0.0762621	ENSG00000139289	5	5	119	90	92	205	127	407	153	224	253	264	+	+	+	+	+	+	+	+	+	+
chr3	113395672	113396409	-0.773256	3.772	9.91827	0.00163646	0.0762621	ENSG00000176542	5	4	101	118	64	220	151	264	51	157	111	85	+	+	+	+	+	+	-	+	+	+
chr7	90224893	90226298	0.54425	5.92511	9.91618	0.00163832	0.0762621	ENSG00000058091	5	5	432	432	302	790	307	719	690	730	533	985	+	+	+	+	+	+	+	+	+	+
chr12	64173266	64174283	0.477904	6.48942	9.91716	0.00163744	0.0762621	ENSG00000118600	5	5	729	528	591	1184	412	1348	824	1088	808	1320	+	+	+	+	+	+	+	+	+	+
chr1	11218819	11219086	-1.11151	1.90814	9.91895	0.00163586	0.0762621	ENSG00000171824	2	2	40	25	28	66	44	42	16	41	14	26	+	-	-	+	-	+	-	+	-	-
chr4	120457635	120458065	-0.945951	2.41515	9.91523	0.00163917	0.0762621	ENSG00000245958	4	0	51	53	55	96	49	51	33	22	35	38	-	+	+	+	+	-	-	-	-	-
chr12	24397777	24398221	-0.686038	4.01476	9.91745	0.00163719	0.0762621	ENSG00000134532	5	5	99	185	114	272	194	150	129	135	105	116	+	+	+	+	+	+	+	+	+	+
chr6	51478415	51478886	0.87055	3.28293	9.92081	0.0016342	0.0762621	ENSG00000170927	2	5	19	28	26	117	63	246	49	95	225	85	-	-	-	+	+	+	+	+	+	+
chr18	25756459	25758484	0.607744	6.31224	9.90866	0.00164503	0.0763991	ENSG00000170558	5	5	517	362	281	1075	567	1099	1033	974	619	1375	+	+	+	+	+	+	+	+	+	+
chr10	127575335	127575730	-0.782203	3.75707	9.9093	0.00164446	0.0763991	ENSG00000089876	4	2	133	119	182	139	174	100	84	91	75	102	-	+	+	+	+	-	-	+	+	-
chr9	97780690	97781132	-0.83461	3.17899	9.90321	0.0016499	0.0764923	ENSG00000148120	5	4	116	75	96	123	92	68	64	68	34	85	+	+	+	+	+	-	+	+	+	+
chr20	26074058	26074457	-1.21342	1.74964	9.9028	0.00165028	0.0764923	ENSG00000175170	4	1	43	34	33	39	40	24	26	20	4	30	-	+	+	+	+	-	+	-	-	-
chr10	6186532	6187748	0.541411	5.12288	9.90153	0.00165142	0.0764923	ENSG00000170525	5	5	235	157	186	477	197	675	344	404	345	449	+	+	+	+	+	+	+	+	+	+
chr11	16247551	16248261	-0.871691	3.55682	9.89518	0.00165712	0.0766888	ENSG00000110696	5	5	108	110	101	168	136	161	61	48	61	147	+	+	+	+	+	+	+	+	+	+
chr3	39222097	39222754	0.504442	5.87351	9.89298	0.00165911	0.0767129	ENSG00000144655	5	5	355	357	330	760	330	939	544	831	559	779	+	+	+	+	+	+	+	+	+	+
chr13	68333247	68333531	-0.970818	2.85391	9.88836	0.00166327	0.0767719	ENSG00000150361	3	1	46	138	85	31	120	30	46	51	29	27	-	+	+	-	+	-	-	+	-	-
chr4	184425187	184426698	0.513437	7.33626	9.88831	0.00166332	0.0767719	ENSG00000168556	5	5	946	1046	946	2329	827	2121	1606	2439	1406	2300	+	+	+	+	+	+	+	+	+	+
chr15	37232829	37233337	-0.933653	2.75686	9.87845	0.00167225	0.0770878	ENSG00000134138	3	2	48	47	50	130	76	97	16	50	70	52	-	+	-	+	+	+	-	-	+	-
chr1	68174220	68174640	0.922808	3.71547	9.87752	0.0016731	0.0770878	ENSG00000116717	3	4	90	59	41	102	58	301	129	103	75	373	+	-	-	+	+	+	+	+	-	+
chr11	93969048	93970070	-0.945135	2.71211	9.87564	0.00167481	0.0770988	ENSG00000110218	4	1	73	95	59	69	60	59	32	36	25	78	-	+	+	+	+	-	-	-	-	+
chr12	96229962	96230379	-1.0041	2.69888	9.87102	0.00167903	0.0772249	ENSG00000139343	5	2	61	64	71	79	87	39	57	48	12	60	+	+	+	+	+	-	+	-	-	+
chr3	79700498	79701214	0.612433	4.70116	9.86858	0.00168125	0.0772595	ENSG00000169855	5	5	105	134	87	299	203	595	221	231	337	382	+	+	+	+	+	+	+	+	+	+
chr18	55772548	55772919	-1.04355	2.80306	9.86694	0.00168275	0.0772607	ENSG00000049759	4	2	55	72	76	102	82	52	16	64	68	37	-	+	+	+	+	-	-	+	+	-
chr4	89533283	89533837	-0.817996	3.24826	9.86501	0.00168452	0.077274	ENSG00000177432	5	2	82	96	117	149	89	90	70	55	46	72	+	+	+	+	+	+	+	-	-	-
chr14	90378999	90379621	-0.846216	3.7454	9.85699	0.00169188	0.0775436	ENSG00000140025	5	5	162	140	149	100	175	118	87	102	51	102	+	+	+	+	+	+	+	+	+	+
chr14	51040551	51041535	-0.717791	3.66402	9.85326	0.00169531	0.0776332	ENSG00000012983	5	5	99	129	76	178	165	156	89	124	69	96	+	+	+	+	+	+	+	+	+	+
chr5	101631556	101632625	0.480732	6.30791	9.84726	0.00170085	0.0776829	ENSG00000145730	5	5	542	546	459	843	502	1229	798	952	863	902	+	+	+	+	+	+	+	+	+	+
chr14	70345902	70346664	0.652589	4.38764	9.8487	0.00169952	0.0776829	ENSG00000198732	5	5	139	146	112	248	90	317	228	236	225	283	+	+	+	+	+	+	+	+	+	+
chr13	20175848	20176814	0.713335	3.84586	9.8477	0.00170045	0.0776829	ENSG00000196199	4	5	100	56	105	183	64	220	187	163	85	246	+	+	+	+	-	+	+	+	+	+
chr7	155088724	155090189	0.512209	6.35258	9.84287	0.00170492	0.0777642	ENSG00000186480	5	5	667	587	655	1067	321	690	1044	1137	560	1076	+	+	+	+	+	+	+	+	+	+
chr6	139401654	139402015	-0.882717	2.63966	9.84213	0.0017056	0.0777642	ENSG00000146386	3	3	64	52	40	95	79	66	29	52	43	51	+	-	-	+	+	+	-	+	+	-
chr5	7910555	7911348	0.927415	2.6783	9.84042	0.00170718	0.0777688	ENSG00000124279	0	5	32	21	20	39	49	179	55	64	87	72	-	-	-	-	-	+	+	+	+	+
chr3	148531659	148532214	0.938166	2.61622	9.83838	0.00170908	0.0777734	ENSG00000153002	1	3	30	17	11	65	27	201	43	51	86	81	-	-	-	+	-	+	-	+	+	-
chr7	25019102	25020311	0.527465	5.72831	9.83712	0.00171025	0.0777734	ENSG00000070882	5	5	342	375	405	679	252	659	616	595	526	631	+	+	+	+	+	+	+	+	+	+
chr5	102738605	102739069	1.13243	1.80316	9.83485	0.00171236	0.0778017	ENSG00000181751	0	3	13	12	16	25	14	90	27	37	28	71	-	-	-	-	-	+	-	+	-	+
chr4	7941078	7941889	0.587586	4.91471	9.832	0.00171502	0.0778101	ENSG00000196526	5	5	240	167	203	434	123	361	360	388	264	384	+	+	+	+	+	+	+	+	+	+
chr8	107669591	107670951	0.541135	5.44525	9.83147	0.00171551	0.0778101	ENSG00000164830	5	5	310	277	313	620	175	629	563	423	327	623	+	+	+	+	+	+	+	+	+	+
chr9	140445682	140446763	0.646089	5.38115	9.82978	0.00171709	0.0778141	ENSG00000182154	5	5	351	268	388	473	156	279	497	708	320	478	+	+	+	+	+	+	+	+	+	+
chr8	23386006	23387310	0.505074	5.95794	9.82785	0.00171889	0.0778284	ENSG00000147454	5	5	450	403	398	771	309	994	653	679	626	767	+	+	+	+	+	+	+	+	+	+
chr7	137638429	137639047	-0.668785	4.07069	9.82228	0.00172411	0.0779972	ENSG00000182158	5	5	161	123	137	283	173	229	106	140	106	137	+	+	+	+	+	+	+	+	+	+
chr5	90303667	90304373	-0.823944	3.33373	9.81986	0.00172637	0.0780324	ENSG00000248323	5	4	57	90	64	176	131	133	44	62	129	50	+	+	+	+	+	+	-	+	+	+
chr3	135684115	135685399	0.558144	6.21648	9.81747	0.00172862	0.0780665	ENSG00000073711	5	5	522	565	572	917	279	1036	842	900	677	859	+	+	+	+	+	+	+	+	+	+
chr18	3604614	3605086	-0.965819	2.59521	9.81315	0.00173269	0.0781642	ENSG00000177426	3	1	72	48	76	107	46	58	51	33	14	47	+	-	+	+	-	+	-	-	-	-
chr11	108800011	108800403	-1.52166	3.22711	9.80834	0.00173722	0.0781642	ENSG00000178105	5	3	55	100	143	137	116	114	56	61	10	63	+	+	+	+	+	+	+	+	-	-
chr9	73820559	73820835	-1.20846	1.7953	9.80855	0.00173702	0.0781642	ENSG00000083067	3	1	36	36	37	43	39	30	10	42	14	18	+	-	-	+	+	-	-	+	-	-
chr15	36166556	36166793	-1.0029	2.13057	9.80726	0.00173824	0.0781642	ENSG00000248079	3	0	45	48	44	66	43	42	30	25	18	30	-	+	+	+	-	-	-	-	-	-
chr8	102243927	102244290	1.07599	2.36372	9.80752	0.00173799	0.0781642	ENSG00000120963	1	4	20	13	17	54	26	126	51	87	68	34	-	-	-	+	-	+	+	+	+	-
chr12	9216782	9218167	0.474125	6.81779	9.80536	0.00174004	0.078178	ENSG00000245105	5	5	802	740	657	1418	593	1878	1154	1227	1033	1598	+	+	+	+	+	+	+	+	+	+
chr1	108742104	108743792	0.48432	6.16261	9.79986	0.00174525	0.0783449	ENSG00000085491	5	5	476	508	463	826	380	1092	758	839	535	1140	+	+	+	+	+	+	+	+	+	+
chr3	78937852	78938800	-0.90937	3.27719	9.79378	0.00175103	0.07847	ENSG00000169855	4	3	82	87	113	127	122	108	76	63	30	76	+	-	+	+	+	+	+	-	-	+
chr10	28643250	28643922	0.737667	3.90825	9.79384	0.00175097	0.07847	ENSG00000150054	2	5	40	42	42	181	99	524	84	175	222	140	-	-	-	+	+	+	+	+	+	+
chr2	187579411	187579693	0.983163	2.40471	9.79187	0.00175285	0.0784842	ENSG00000144369	0	3	32	18	16	48	26	131	53	40	79	63	-	-	-	-	-	+	+	-	+	-
chr3	116113233	116113564	-0.942587	2.69131	9.787	0.00175749	0.078625	ENSG00000172020	2	4	73	33	49	154	52	88	45	47	14	68	+	-	-	+	-	+	+	+	-	+
chr4	168824456	168824876	-0.903654	3.07833	9.77912	0.00176505	0.0788805	ENSG00000109511	5	4	56	110	99	104	105	57	44	50	47	79	+	+	+	+	+	-	+	+	+	+
chr3	123168004	123169119	0.764416	3.9037	9.7779	0.00176622	0.0788805	ENSG00000173175	3	5	103	63	65	138	96	280	160	123	264	127	-	-	+	+	+	+	+	+	+	+
chr5	34411600	34412167	0.977922	3.15224	9.77576	0.00176828	0.0789054	ENSG00000039560	2	5	58	26	34	69	57	214	110	58	79	168	+	-	-	-	+	+	+	+	+	+
chr1	97453262	97453718	0.84477	3.04553	9.77317	0.00177077	0.0789493	ENSG00000117569	2	5	57	43	44	46	56	123	66	129	97	114	-	+	-	-	+	+	+	+	+	+
chr16	32843827	32844453	-0.988542	2.95419	9.77074	0.00177311	0.0789865	ENSG00000205456	5	3	94	80	123	77	76	57	55	29	22	66	+	+	+	+	+	+	-	+	-	+
chr5	6868317	6868801	0.737409	3.63016	9.7561	0.00178729	0.0790798	ENSG00000112941	3	5	65	47	40	104	89	334	89	126	174	157	+	+	-	-	+	+	+	+	+	+
chr2	89572439	89572884	-1.24297	1.92289	9.7575	0.00178593	0.0790798	ENSG00000230006	3	1	24	18	35	66	50	81	7	18	20	36	-	-	+	+	+	+	-	-	-	-
chr7	20492702	20493410	0.962456	2.81178	9.75786	0.00178558	0.0790798	ENSG00000105855	0	3	25	24	22	46	41	183	41	58	181	42	-	-	-	-	-	+	-	+	+	-
chr12	89432043	89432492	1.03238	2.30233	9.76581	0.00177787	0.0790798	ENSG00000139318	0	5	34	20	12	32	24	114	62	81	38	54	-	-	-	-	-	+	+	+	+	+
chr15	99366369	99366773	-0.925306	2.43396	9.76043	0.00178308	0.0790798	ENSG00000140443	4	2	51	51	59	75	68	36	30	38	31	41	+	+	-	+	+	-	-	+	-	+
chr21	27901284	27901502	-1.26015	1.81748	9.75869	0.00178477	0.0790798	ENSG00000166265	3	0	43	42	60	45	17	34	8	25	12	22	+	+	+	-	-	-	-	-	-	-
chr6	64373246	64373773	-0.91647	2.6661	9.75869	0.00178477	0.0790798	ENSG00000118482	4	0	54	45	95	117	64	48	52	33	23	44	-	+	+	+	+	-	-	-	-	-
chr7	126341131	126341663	-0.711074	4.26234	9.76058	0.00178294	0.0790798	ENSG00000179603	5	5	155	148	172	260	243	287	122	172	98	151	+	+	+	+	+	+	+	+	+	+
chr3	98450907	98452314	0.498354	5.93517	9.74588	0.00179726	0.0792976	ENSG00000064225	5	5	363	350	324	856	333	1163	595	625	543	989	+	+	+	+	+	+	+	+	+	+
chr14	59930867	59932281	0.504773	5.75168	9.74684	0.00179632	0.0792976	ENSG00000181619	5	5	310	359	265	690	328	791	557	728	459	822	+	+	+	+	+	+	+	+	+	+
chr12	2277965	2278538	-0.671652	4.4486	9.74398	0.00179911	0.0792976	ENSG00000151065	5	5	151	197	137	349	267	256	89	237	187	197	+	+	+	+	+	+	+	+	+	+
chr4	185746401	185748077	0.498092	6.00003	9.74223	0.00180083	0.0792976	ENSG00000151726	5	5	419	409	345	811	414	724	771	901	531	876	+	+	+	+	+	+	+	+	+	+
chr18	73120823	73121253	-0.66941	4.07519	9.74021	0.0018028	0.0792976	ENSG00000179981	5	5	146	168	157	217	210	121	142	165	101	94	+	+	+	+	+	+	+	+	+	+
chr8	37756406	37757437	0.488774	5.7765	9.74208	0.00180097	0.0792976	ENSG00000156675	5	5	366	347	368	739	309	623	732	700	428	676	+	+	+	+	+	+	+	+	+	+
chr3	21713838	21714131	-1.21541	2.32188	9.74027	0.00180275	0.0792976	ENSG00000151789	3	1	37	52	86	45	76	27	49	24	7	24	-	+	+	-	+	-	+	-	-	-
chr8	86785846	86786843	-0.92875	3.78038	9.73374	0.00180916	0.0793771	ENSG00000104267	5	5	267	130	208	73	112	82	56	81	40	140	+	+	+	+	+	+	+	+	+	+
chr7	28823808	28824998	-0.708591	3.72679	9.73498	0.00180794	0.0793771	ENSG00000106069	3	5	104	102	77	247	139	230	77	118	73	122	-	+	-	+	+	+	+	+	+	+
chr4	149352502	149353034	-0.704781	3.99131	9.7343	0.0018086	0.0793771	ENSG00000151623	5	5	128	164	136	272	146	201	104	104	121	113	+	+	+	+	+	+	+	+	+	+
chr2	242529377	242530325	-0.784238	3.58812	9.7284	0.00181443	0.0794752	ENSG00000176720	5	4	117	187	81	101	125	108	42	137	70	113	+	+	+	+	+	+	-	+	+	+
chr2	120980426	120981480	0.49313	5.90443	9.72843	0.00181439	0.0794752	ENSG00000226479	5	5	423	399	310	706	345	883	587	725	529	964	+	+	+	+	+	+	+	+	+	+
chr2	198056306	198056763	-1.03622	2.23535	9.72434	0.00181843	0.0795842	ENSG00000065413	3	2	33	43	49	70	63	58	21	19	30	39	-	-	+	+	+	+	-	-	+	-
chr3	45187280	45188235	0.686373	4.1061	9.72044	0.0018223	0.0796202	ENSG00000163814	5	5	134	70	112	247	75	228	216	228	151	211	+	+	+	+	+	+	+	+	+	+
chr5	125475457	125475935	-0.817024	3.12179	9.72066	0.00182208	0.0796202	ENSG00000155324	5	4	102	89	84	99	76	108	31	47	81	71	+	+	+	+	+	+	-	+	+	+
chr17	81036971	81037716	0.907148	3.53436	9.71225	0.00183044	0.0798428	ENSG00000176845	2	3	127	74	69	113	29	50	241	157	75	126	+	-	-	+	-	-	+	+	-	+
chr3	123602793	123603600	0.744108	3.83044	9.71356	0.00182914	0.0798428	ENSG00000065534	3	5	112	67	87	182	49	232	145	198	137	178	+	+	-	+	-	+	+	+	+	+
chr12	26559447	26559931	-1.10917	2.45025	9.71031	0.00183237	0.0798605	ENSG00000123095	2	2	44	52	33	114	78	21	21	59	43	30	-	-	-	+	+	-	-	+	+	-
chr6	46433441	46433806	-0.925333	2.36081	9.70641	0.00183627	0.0799639	ENSG00000172348	3	3	47	55	34	87	62	40	33	36	37	31	-	+	-	+	+	+	-	+	+	-
chr4	133044024	133044253	-1.07894	2.34998	9.70035	0.00184233	0.0801614	ENSG00000138650	3	0	54	35	48	62	88	44	26	23	23	51	+	-	-	+	+	-	-	-	-	-
chr6	71779702	71780103	1.07824	2.07854	9.69347	0.00184924	0.0803285	ENSG00000119900	0	4	21	17	9	38	24	92	61	30	44	63	-	-	-	-	-	+	+	-	+	+
chr2	169067636	169068322	-0.675813	4.17586	9.6943	0.0018484	0.0803285	ENSG00000198648	5	5	188	163	209	281	152	171	158	133	90	116	+	+	+	+	+	+	+	+	+	+
chr4	114468574	114469549	-0.502775	5.71061	9.68826	0.00185449	0.0804269	ENSG00000145349	5	5	439	541	416	729	523	576	364	388	387	526	+	+	+	+	+	+	+	+	+	+
chr4	112497783	112498062	1.09202	2.35544	9.68665	0.00185611	0.0804269	ENSG00000174749	0	5	27	24	17	28	47	56	78	41	49	103	-	-	-	-	-	+	+	+	+	+
chr3	73625972	73626594	-0.858608	3.33107	9.68798	0.00185478	0.0804269	ENSG00000121440	5	4	91	78	111	138	127	100	54	104	49	69	+	+	+	+	+	+	-	+	+	+
chr8	18467263	18467811	-0.892952	2.45272	9.67868	0.00186418	0.0807099	ENSG00000171428	3	2	51	57	41	81	67	50	32	40	36	38	-	+	-	+	+	-	-	+	+	-
chr12	38502380	38502951	-0.87513	2.8422	9.67483	0.00186809	0.0807458	ENSG00000175548	5	2	82	57	79	101	87	53	51	34	37	62	+	+	+	+	+	-	+	-	-	+
chr2	201170534	201172447	0.544018	5.56346	9.67618	0.00186672	0.0807458	ENSG00000196141	5	5	335	343	289	602	206	709	607	524	393	588	+	+	+	+	+	+	+	+	+	+
chr7	89466774	89467211	0.875613	3.23003	9.66961	0.00187341	0.0809088	ENSG00000235436	2	5	42	56	57	68	60	165	147	96	59	146	-	+	-	+	-	+	+	+	+	+
chr2	199745796	199746255	-0.984837	2.80631	9.66385	0.00187929	0.0810606	ENSG00000119042	5	2	67	75	81	83	83	60	42	37	21	79	+	+	+	+	+	+	-	-	-	+
chr15	37415819	37416193	-1.25859	1.5102	9.66314	0.00188002	0.0810606	ENSG00000134138	3	0	36	20	10	44	43	30	16	16	6	33	+	-	-	+	+	-	-	-	-	-
chr18	3012449	3013662	0.494363	6.19522	9.6576	0.0018857	0.0812385	ENSG00000101577	5	5	536	454	407	899	457	798	952	988	509	1104	+	+	+	+	+	+	+	+	+	+
chr7	86785151	86785383	-0.660308	4.18761	9.65322	0.0018902	0.0812612	ENSG00000224046	4	1	132	151	139	320	220	227	132	96	169	120	-	+	+	+	+	-	-	-	+	-
chr2	220348924	220349950	0.681161	4.24068	9.65149	0.00189198	0.0812612	ENSG00000144591	3	5	113	75	74	230	114	322	157	329	171	301	-	-	+	+	+	+	+	+	+	+
chr4	154386823	154388854	0.499711	6.83161	9.65215	0.0018913	0.0812612	ENSG00000121210	5	5	818	704	568	1559	608	1547	1114	1406	1034	1891	+	+	+	+	+	+	+	+	+	+
chr19	22715032	22715905	0.716387	4.4394	9.65105	0.00189243	0.0812612	ENSG00000197360	4	5	199	136	308	266	37	139	341	226	130	210	+	+	+	+	-	+	+	+	+	+
chr8	144512236	144513546	0.502634	5.89714	9.64583	0.00189782	0.0812987	ENSG00000182759	5	5	486	425	475	719	257	475	857	885	354	720	+	+	+	+	+	+	+	+	+	+
chr1	110170715	110171447	-0.675175	3.96361	9.64589	0.00189775	0.0812987	ENSG00000116337	5	5	162	161	121	196	166	166	103	130	82	153	+	+	+	+	+	+	+	+	+	+
chr12	42326012	42326899	0.647454	4.77235	9.6457	0.00189796	0.0812987	ENSG00000151233	5	5	176	144	95	311	196	459	346	251	261	441	+	+	+	+	+	+	+	+	+	+
chr13	97857829	97858684	-0.847451	3.68868	9.64234	0.00190143	0.081381	ENSG00000139793	5	4	90	138	80	133	207	155	45	116	72	155	+	+	+	+	+	+	-	+	+	+
chr10	60679494	60680138	-0.850679	2.85291	9.63082	0.00191339	0.0818259	ENSG00000165443	3	4	66	83	68	92	86	63	61	52	33	42	-	+	-	+	+	+	+	+	-	+
chr12	3474818	3475530	0.759994	3.51813	9.62265	0.00192193	0.082124	ENSG00000011105	2	5	76	48	85	165	40	173	137	150	92	149	-	-	+	+	-	+	+	+	+	+
chr1	164614030	164614494	0.836794	3.00408	9.62077	0.00192389	0.082141	ENSG00000185630	1	5	38	49	50	93	34	123	104	73	85	114	-	-	-	+	-	+	+	+	+	+
chr2	199983234	199983929	0.682065	4.22397	9.61908	0.00192566	0.0821494	ENSG00000119042	5	5	103	71	80	204	152	314	169	196	211	333	+	+	+	+	+	+	+	+	+	+
chr13	56150538	56151071	-1.06296	1.95593	9.61366	0.00193136	0.082266	ENSG00000118946	3	1	36	40	30	46	54	47	18	24	17	34	-	+	-	+	+	+	-	-	-	-
chr2	209179879	209180302	-0.929302	2.52441	9.61349	0.00193153	0.082266	ENSG00000144407	2	2	66	41	54	117	50	39	40	60	18	46	+	-	-	+	-	-	-	+	-	+
chr18	24592936	24593258	-0.920241	3.19592	9.60826	0.00193705	0.0824338	ENSG00000171885	4	4	77	76	94	128	124	79	35	107	57	57	-	+	+	+	+	+	+	+	+	-
chr12	25767908	25768533	-0.783012	3.66787	9.60598	0.00193945	0.082469	ENSG00000152936	5	5	105	116	132	210	117	172	94	100	47	104	+	+	+	+	+	+	+	+	+	+
chr18	64200858	64201645	0.754037	3.76598	9.60155	0.00194413	0.0826013	ENSG00000071991	2	4	58	62	48	120	66	410	74	112	250	153	-	-	-	+	+	+	-	+	+	+
chr5	115697061	115697781	0.680279	3.8935	9.59855	0.00194731	0.082669	ENSG00000248445	4	5	98	66	88	176	80	265	160	173	150	192	+	-	+	+	+	+	+	+	+	+
chr6	163950710	163951198	-0.878437	2.68032	9.59113	0.0019552	0.0829367	ENSG00000112531	3	1	69	56	68	104	57	57	25	44	45	59	+	-	+	+	-	-	-	+	-	-
chr3	75736714	75737618	-0.861798	4.4469	9.58623	0.00196043	0.0830913	ENSG00000242516	5	5	304	158	240	231	270	187	172	129	72	206	+	+	+	+	+	+	+	+	+	+
chr4	89680079	89680889	-0.822512	2.99728	9.5768	0.00197052	0.083185	ENSG00000248019	4	3	75	52	61	138	91	114	34	36	71	77	+	-	+	+	+	+	-	-	+	+
chr19	49623152	49623608	0.90888	3.02919	9.57855	0.00196864	0.083185	ENSG00000177380	0	3	64	46	76	84	24	50	99	137	72	101	-	-	-	-	-	-	-	+	+	+
chr3	146139598	146140266	-0.798355	3.05976	9.5797	0.00196741	0.083185	ENSG00000188313	5	3	75	72	80	145	96	62	71	62	51	44	+	+	+	+	+	-	+	+	+	-
chr9	108824643	108824997	-0.84508	3.21259	9.57674	0.00197058	0.083185	ENSG00000095209	5	4	71	80	89	129	150	52	56	72	53	81	+	+	+	+	+	-	+	+	+	+
chr7	35595452	35596045	-1.03638	2.55561	9.58196	0.00196499	0.083185	ENSG00000122557	3	1	38	119	40	74	56	52	30	29	29	56	-	+	-	+	+	+	-	-	-	-
chr3	31282049	31282460	-0.914932	2.67374	9.57074	0.00197703	0.083371	ENSG00000163527	5	2	59	90	43	84	66	67	38	51	46	28	+	+	+	+	+	-	-	+	+	-
chr4	85354049	85354327	-1.07499	2.33758	9.56969	0.00197817	0.083371	ENSG00000163623	3	0	63	50	56	42	69	44	31	41	14	32	-	+	+	-	+	-	-	-	-	-
chr10	120788422	120790441	0.518329	6.33553	9.5652	0.001983	0.0834406	ENSG00000188613	5	5	568	561	442	1050	406	998	847	1165	773	1039	+	+	+	+	+	+	+	+	+	+
chr7	113131281	113131758	-0.874127	2.94451	9.56524	0.00198296	0.0834406	ENSG00000214194	4	3	74	38	51	151	108	87	38	66	59	49	+	+	-	+	+	-	-	+	+	+
chr3	3573166	3573447	-1.11363	2.06976	9.55892	0.0019898	0.0835257	ENSG00000175928	3	1	33	37	36	70	67	17	17	42	21	33	-	+	-	+	+	-	-	+	-	-
chr16	30345756	30347059	0.702152	4.87985	9.56021	0.00198841	0.0835257	ENSG00000183604	4	5	292	174	268	429	50	246	465	431	141	315	+	+	+	+	-	+	+	+	+	+
chr21	10200187	10201015	-1.15979	2.66517	9.55891	0.00198981	0.0835257	ENSG00000188681	3	1	83	47	112	65	63	66	34	26	15	50	+	-	+	+	-	-	-	-	-	+
chr4	56982033	56982578	-0.905599	2.8033	9.55604	0.00199292	0.0835895	ENSG00000109265	4	3	101	60	54	78	82	69	43	52	28	63	+	+	+	+	-	-	+	+	-	+
chr11	85521656	85522590	0.616201	4.46136	9.55122	0.00199817	0.0837425	ENSG00000137501	5	5	138	108	146	347	101	309	260	236	235	266	+	+	+	+	+	+	+	+	+	+
chr14	38548221	38548830	-0.77027	3.38212	9.54869	0.00200092	0.083782	ENSG00000139874	5	5	59	76	63	209	154	126	69	101	77	51	+	+	+	+	+	+	+	+	+	+
chr8	61442488	61442755	-0.974393	2.47407	9.54742	0.00200231	0.083782	ENSG00000104388	3	1	60	34	81	102	52	40	46	30	14	44	-	-	+	+	+	-	+	-	-	-
chr10	88125781	88127177	0.715468	3.94733	9.54334	0.00200677	0.0838655	ENSG00000062650	1	5	102	91	85	212	64	200	211	167	166	182	-	-	-	+	-	+	+	+	+	+
chr13	76542263	76542551	-1.07918	2.11662	9.54266	0.00200751	0.0838655	ENSG00000136153	4	0	24	57	51	67	51	29	20	28	21	36	-	+	+	+	+	-	-	-	-	-
chr19	30302417	30303104	0.63438	4.79554	9.54073	0.00200962	0.0838867	ENSG00000105173	5	5	287	212	196	288	86	182	472	404	153	308	+	+	+	+	+	+	+	+	+	+
chr5	112571784	112572611	-0.620067	4.28562	9.53129	0.00201998	0.0841851	ENSG00000171444	5	5	174	173	147	276	220	234	112	174	156	152	+	+	+	+	+	+	+	+	+	+
chr4	121842895	121844399	0.481795	6.30398	9.53275	0.00201838	0.0841851	ENSG00000138738	5	5	516	522	425	1010	413	1439	849	880	618	1190	+	+	+	+	+	+	+	+	+	+
chr5	171710053	171711267	0.484171	5.81903	9.52731	0.00202436	0.0843007	ENSG00000168246	5	5	434	350	464	773	246	610	709	738	373	755	+	+	+	+	+	+	+	+	+	+
chr6	86630503	86630897	0.749374	3.48775	9.5201	0.00203233	0.0844312	ENSG00000203875	1	5	49	43	38	107	109	193	102	111	171	150	-	-	-	-	+	+	+	+	+	+
chr9	77058182	77058698	-1.02011	2.46675	9.52221	0.00203	0.0844312	ENSG00000198963	3	0	52	77	53	32	106	19	41	32	18	37	-	+	+	-	+	-	-	-	-	-
chr14	62351287	62352422	-0.763703	3.84801	9.52149	0.00203079	0.0844312	ENSG00000139973	5	5	106	133	124	197	175	210	91	127	59	134	+	+	+	+	+	+	+	+	+	+
chr11	1212823	1213569	-0.884763	3.52788	9.51482	0.00203819	0.0846076	ENSG00000078902	5	3	199	86	129	127	98	113	81	73	31	108	+	+	+	+	+	+	-	+	-	+
chr5	108662793	108663802	-0.730595	3.62617	9.51193	0.0020414	0.0846736	ENSG00000198961	5	3	109	89	82	189	176	144	75	101	82	106	+	+	+	+	+	+	-	-	+	+
chr3	39850242	39851749	0.50742	5.86987	9.50868	0.00204502	0.0847566	ENSG00000168028	5	5	371	375	284	806	352	711	707	802	491	816	+	+	+	+	+	+	+	+	+	+
chr1	161993329	161993998	0.795784	3.62404	9.50564	0.00204841	0.08483	ENSG00000162745	4	5	77	62	94	118	55	233	182	129	79	163	-	+	+	+	+	+	+	+	+	+
chr1	65510157	65510507	1.10544	2.12116	9.50274	0.00205165	0.0848973	ENSG00000162434	0	4	23	15	15	15	30	99	38	74	29	76	-	-	-	-	-	+	+	+	-	+
chr3	22406435	22406886	-1.10701	2.30131	9.49735	0.00205769	0.0850798	ENSG00000151789	3	1	34	35	53	76	72	65	22	32	16	47	-	-	+	+	+	+	-	-	-	-
chr5	21336626	21336895	-0.838323	3.01277	9.49424	0.00206118	0.08509	ENSG00000183666	4	2	66	78	86	111	97	78	40	47	54	75	-	+	+	+	+	+	-	+	-	-
chr2	14772318	14773012	0.509394	5.93835	9.49496	0.00206038	0.08509	ENSG00000162981	5	5	392	323	392	873	368	752	600	826	622	836	+	+	+	+	+	+	+	+	+	+
chr16	59699439	59700120	0.656162	4.4464	9.4883	0.00206786	0.0852985	ENSG00000125166	3	5	92	82	75	255	207	340	161	256	342	309	-	+	-	+	+	+	+	+	+	+
chr4	82392530	82393749	0.482984	6.77333	9.48625	0.00207018	0.0853267	ENSG00000138670	5	5	722	683	539	1316	728	1492	1019	1547	1111	1523	+	+	+	+	+	+	+	+	+	+
chr2	193059000	193060480	0.62555	4.62601	9.48376	0.00207299	0.0853754	ENSG00000173559	4	5	143	174	94	299	127	450	291	280	241	329	-	+	+	+	+	+	+	+	+	+
chr2	158732301	158733545	0.457717	6.93621	9.47888	0.00207851	0.0855181	ENSG00000115170	5	5	903	738	747	1636	693	1557	1432	1567	901	1816	+	+	+	+	+	+	+	+	+	+
chr5	130599136	130600425	0.505861	6.07452	9.47782	0.00207972	0.0855181	ENSG00000158985	5	5	503	394	396	1045	299	884	715	818	596	996	+	+	+	+	+	+	+	+	+	+
chr14	24822850	24823343	-0.885613	2.78304	9.47241	0.00208585	0.0857032	ENSG00000100968	4	2	72	76	78	82	70	60	46	62	29	39	-	+	+	+	+	+	-	+	-	-
chr14	25476113	25476900	-0.579528	4.93614	9.46878	0.00208998	0.0858054	ENSG00000168952	5	5	236	325	274	437	314	268	181	312	223	260	+	+	+	+	+	+	+	+	+	+
chr2	10224051	10224455	-1.07537	2.57486	9.46719	0.00209179	0.0858126	ENSG00000205795	3	1	49	44	62	93	95	29	23	70	28	42	-	+	-	+	+	-	-	+	-	-
chr10	78188867	78189288	-0.882454	2.7839	9.46377	0.0020957	0.0859056	ENSG00000148655	4	1	82	84	73	83	50	72	29	60	35	53	+	+	+	-	+	+	-	-	-	-
chr2	111919511	111919909	0.790917	3.3614	9.46206	0.00209766	0.0859187	ENSG00000153094	3	5	60	47	29	126	35	277	75	106	117	166	+	+	-	+	-	+	+	+	+	+
chr12	103602903	103603447	-0.957617	2.60101	9.45778	0.00210256	0.0859296	ENSG00000171759	3	2	60	52	31	87	90	49	18	37	60	65	-	+	-	+	+	-	-	-	+	+
chr5	94955678	94957748	0.498907	6.46886	9.45953	0.00210055	0.0859296	ENSG00000175449	5	5	540	541	402	1159	597	1183	926	1184	766	1433	+	+	+	+	+	+	+	+	+	+
chr3	52050030	52050591	1.00137	2.22625	9.45753	0.00210284	0.0859296	ENSG00000162244	1	5	13	10	22	57	31	111	63	56	42	45	-	-	-	+	-	+	+	+	+	+
chr4	167240122	167240516	-1.03108	2.1531	9.4556	0.00210506	0.0859529	ENSG00000196104	3	1	52	50	58	54	37	37	26	37	13	28	-	+	+	+	-	-	-	+	-	-
chr10	127139927	127140296	0.886504	2.80629	9.45391	0.00210699	0.085965	ENSG00000107938	1	4	25	21	28	76	38	164	46	60	151	61	-	-	-	+	-	+	-	+	+	+
chr15	80986930	80988223	0.604443	4.52918	9.43413	0.00212984	0.0863618	ENSG00000136379	4	5	176	125	152	314	110	205	350	312	152	319	+	+	-	+	+	+	+	+	+	+
chr2	154727783	154729239	0.506206	7.09425	9.43674	0.00212681	0.0863618	ENSG00000144278	5	5	755	917	539	1788	864	2083	1255	1877	1330	2167	+	+	+	+	+	+	+	+	+	+
chr2	242640710	242642409	0.502234	6.32485	9.43968	0.00212341	0.0863618	ENSG00000168395	5	5	686	557	573	907	390	644	1064	1284	516	996	+	+	+	+	+	+	+	+	+	+
chr2	124782226	124783133	0.566625	4.96837	9.43478	0.00212908	0.0863618	ENSG00000155052	5	5	219	195	183	357	161	536	315	272	290	543	+	+	+	+	+	+	+	+	+	+
chr4	176356475	176357003	0.774583	3.77377	9.43572	0.002128	0.0863618	ENSG00000150625	3	5	67	36	39	125	87	521	102	115	159	161	+	-	-	+	+	+	+	+	+	+
chr4	151158160	151158867	-1.0171	2.69167	9.43762	0.00212579	0.0863618	ENSG00000170390	4	1	53	70	77	94	68	53	33	35	19	85	-	+	+	+	+	-	-	-	-	+
chr9	43684792	43685337	0.861955	3.15617	9.43034	0.00213424	0.0863618	ENSG00000154529	3	5	39	78	24	64	54	151	155	126	76	72	-	+	-	+	+	+	+	+	+	+
chr17	80476934	80477741	0.584672	5.05125	9.43007	0.00213456	0.0863618	ENSG00000141568	5	5	289	255	297	372	111	219	502	482	206	358	+	+	+	+	+	+	+	+	+	+
chr12	39836084	39837649	0.471813	7.70779	9.43193	0.0021324	0.0863618	ENSG00000139116	5	5	1440	1318	1236	2810	1168	2712	2008	2686	1998	3097	+	+	+	+	+	+	+	+	+	+
chr18	1412684	1413241	-0.898457	2.62605	9.43477	0.00212909	0.0863618	ENSG00000141433	5	2	52	54	52	88	97	37	60	46	21	45	+	+	+	+	+	-	+	+	-	-
chr11	19366525	19368242	0.573925	4.58868	9.42982	0.00213485	0.0863618	ENSG00000166833	5	5	135	161	127	259	155	380	264	299	225	328	+	+	+	+	+	+	+	+	+	+
chr6	102116438	102116808	-0.749333	3.99393	9.41797	0.00214869	0.0863881	ENSG00000164418	5	4	126	158	184	229	172	182	129	78	90	111	+	+	+	+	+	+	+	+	+	-
chr16	576978	578198	0.562292	5.38989	9.41998	0.00214633	0.0863881	ENSG00000103326	5	5	379	269	353	561	139	317	578	621	258	515	+	+	+	+	+	+	+	+	+	+
chr5	106209262	106209758	-0.78705	3.14526	9.41912	0.00214735	0.0863881	ENSG00000184349	4	3	114	70	84	173	58	92	48	51	58	78	+	+	+	+	-	+	-	-	+	+
chr7	121035631	121036815	0.463436	7.11781	9.41834	0.00214826	0.0863881	ENSG00000196937	5	5	913	915	905	1892	731	1872	1434	1728	1184	2041	+	+	+	+	+	+	+	+	+	+
chr4	141016968	141017930	-0.621261	4.48999	9.4226	0.00214328	0.0863881	ENSG00000196782	5	4	217	215	171	281	273	234	169	167	123	226	+	+	+	+	+	-	+	+	+	+
chr7	80548198	80548812	0.758624	4.8183	9.42107	0.00214506	0.0863881	ENSG00000075223	5	5	167	191	175	425	81	370	425	337	276	285	+	+	+	+	+	+	+	+	+	+
chr5	135527559	135529278	0.579958	5.05286	9.4235	0.00214223	0.0863881	ENSG00000113658	4	5	236	127	110	428	187	780	245	366	446	417	+	+	-	+	+	+	+	+	+	+
chr12	3185883	3187086	0.527014	5.53791	9.42276	0.00214309	0.0863881	ENSG00000011105	5	5	404	284	335	558	216	563	501	592	451	541	+	+	+	+	+	+	+	+	+	+
chr17	25274455	25275188	-1.12006	3.19094	9.41411	0.00215322	0.0865037	ENSG00000109046	4	2	168	101	88	119	69	78	63	16	28	88	+	+	+	+	-	-	-	-	+	+
chr4	17704048	17704645	0.782941	3.26202	9.4122	0.00215546	0.0865273	ENSG00000047662	2	5	37	38	40	99	68	192	68	125	142	122	-	-	-	+	+	+	+	+	+	+
chr5	161452372	161452736	-1.10734	2.21875	9.40819	0.00216019	0.0866506	ENSG00000113327	4	0	45	67	74	46	44	29	33	14	12	36	+	+	+	+	-	-	-	-	-	-
chr10	124264036	124264441	0.970362	3.0963	9.39963	0.00217029	0.0869892	ENSG00000166033	3	5	69	22	32	87	44	118	87	152	112	92	+	-	-	+	+	+	+	+	+	+
chr11	94822529	94823677	0.484164	6.25318	9.39766	0.00217262	0.086994	ENSG00000149218	5	5	493	445	331	1068	457	1215	765	973	683	1167	+	+	+	+	+	+	+	+	+	+
chr4	56814679	56815584	0.479942	6.46406	9.39673	0.00217373	0.086994	ENSG00000174799	5	5	522	575	608	1177	509	1185	889	930	927	1248	+	+	+	+	+	+	+	+	+	+
chr13	52377573	52378679	0.484692	6.55281	9.39219	0.00217912	0.0870937	ENSG00000102796	5	5	667	582	486	1148	578	1233	901	1350	883	1341	+	+	+	+	+	+	+	+	+	+
chr5	692691	694359	0.547091	5.53495	9.39183	0.00217954	0.0870937	ENSG00000171368	5	5	368	251	278	766	168	666	612	581	333	567	+	+	+	+	+	+	+	+	+	+
chr6	134990716	134990962	-1.00277	2.38632	9.3865	0.00218589	0.0872805	ENSG00000118515	3	0	58	27	43	93	75	55	33	22	25	48	+	-	-	+	+	-	-	-	-	-
chr11	16532852	16533552	-0.873651	3.07584	9.38344	0.00218954	0.0873317	ENSG00000110696	5	4	75	73	93	127	96	101	59	40	37	74	+	+	+	+	+	+	+	+	-	+
chr4	103655813	103656471	-0.773982	3.43608	9.38264	0.0021905	0.0873317	ENSG00000109323	4	5	103	144	91	161	78	119	69	103	52	79	+	+	+	+	-	+	+	+	+	+
chr10	65313833	65314148	-1.1562	2.42496	9.37933	0.00219446	0.0873565	ENSG00000165476	3	1	43	42	58	72	87	43	25	38	13	63	-	-	+	+	+	-	-	-	-	+
chr4	4861087	4862036	0.588969	4.64347	9.38043	0.00219314	0.0873565	ENSG00000152953	5	5	139	119	211	379	118	331	275	314	188	379	+	+	+	+	+	+	+	+	+	+
chr3	17413989	17414546	-0.890942	2.95201	9.36706	0.0022092	0.0878764	ENSG00000154822	5	3	63	101	91	89	81	76	41	35	47	66	+	+	+	+	+	+	-	-	+	+
chr8	41435094	41436307	0.478394	6.02307	9.3644	0.00221241	0.0879373	ENSG00000158669	5	5	433	378	462	896	318	942	646	903	480	965	+	+	+	+	+	+	+	+	+	+
chr5	122180659	122181947	0.469675	6.49708	9.35956	0.00221825	0.0879875	ENSG00000064652	5	5	569	557	514	1235	548	1284	985	1020	776	1399	+	+	+	+	+	+	+	+	+	+
chr9	68495846	68496480	-0.95028	3.28453	9.3578	0.00222039	0.0879875	ENSG00000170161	5	4	149	82	95	111	96	89	76	59	19	109	+	+	+	+	+	+	+	+	-	+
chr5	21775003	21775214	-1.08608	1.88559	9.3617	0.00221566	0.0879875	ENSG00000183666	3	1	31	28	46	71	39	30	19	33	16	18	-	-	+	+	+	-	-	+	-	-
chr2	166703613	166704324	-0.85195	2.86668	9.35798	0.00222017	0.0879875	ENSG00000115339	3	4	56	61	50	124	100	99	59	48	39	41	-	+	-	+	+	+	+	+	-	+
chr1	244624481	244625221	0.515977	5.19097	9.35618	0.00222235	0.0879985	ENSG00000179397	5	5	267	189	246	466	199	524	359	455	307	566	+	+	+	+	+	+	+	+	+	+
chr12	25151053	25151452	-0.984556	2.25971	9.3484	0.0022318	0.0883062	ENSG00000118308	2	3	40	28	41	86	70	49	20	38	39	24	-	-	-	+	+	+	-	+	+	-
chr4	75023338	75024590	0.45748	6.7214	9.34119	0.00224059	0.0883189	ENSG00000163738	5	5	819	579	726	1198	636	1575	938	1222	946	1673	+	+	+	+	+	+	+	+	+	+
chr19	1862837	1864459	0.580814	5.82839	9.34137	0.00224038	0.0883189	ENSG00000129911	4	5	582	446	490	638	154	266	937	847	271	656	+	+	+	+	-	+	+	+	+	+
chr6	131685159	131685903	-0.760579	3.42621	9.33985	0.00224224	0.0883189	ENSG00000118507	4	5	108	130	79	179	88	95	64	82	76	89	+	+	-	+	+	+	+	+	+	+
chr4	48018219	48019575	0.480117	6.6745	9.34573	0.00223505	0.0883189	ENSG00000198515	5	5	699	701	617	1217	585	1369	911	1077	1228	1448	+	+	+	+	+	+	+	+	+	+
chr21	29385260	29385927	-0.928627	3.40042	9.34041	0.00224156	0.0883189	ENSG00000156239	5	4	117	64	90	138	165	97	57	120	66	45	+	+	+	+	+	+	+	+	+	-
chr11	45686386	45687620	0.71128	3.87146	9.34196	0.00223966	0.0883189	ENSG00000181830	4	5	102	82	101	208	46	181	207	213	99	177	+	+	+	+	-	+	+	+	+	+
chr6	162577140	162577482	-1.1394	2.17159	9.3308	0.00225334	0.0886228	ENSG00000112530	3	0	31	56	57	45	59	52	16	21	22	38	-	+	+	-	+	-	-	-	-	-
chr2	134877230	134879110	0.501855	6.07961	9.33164	0.00225231	0.0886228	ENSG00000152127	5	5	426	411	331	1053	317	1174	717	778	598	973	+	+	+	+	+	+	+	+	+	+
chr6	71108101	71109357	-0.487442	6.66088	9.32706	0.00225794	0.0886707	ENSG00000082269	5	5	696	966	848	1374	1265	920	683	793	834	976	+	+	+	+	+	+	+	+	+	+
chr3	174793009	174793333	-1.01268	1.90173	9.32802	0.00225676	0.0886707	ENSG00000177694	3	0	34	27	34	58	55	31	18	23	30	20	+	-	-	+	+	-	-	-	-	-
chr12	42970139	42970579	-0.841552	3.36875	9.31717	0.00227016	0.0890837	ENSG00000139174	5	4	82	126	129	95	141	53	59	95	46	79	+	+	+	+	+	+	+	+	-	+
chr4	103681381	103682768	0.493557	5.74433	9.3129	0.00227546	0.0892251	ENSG00000109323	5	5	324	270	269	718	372	889	507	562	538	865	+	+	+	+	+	+	+	+	+	+
chr4	157397389	157397844	-1.02957	2.55681	9.30642	0.00228352	0.0892736	ENSG00000145431	4	1	42	86	74	56	72	50	43	37	15	40	-	+	+	+	+	+	-	-	-	-
chr13	114144447	114145748	0.53807	6.07136	9.30701	0.00228279	0.0892736	ENSG00000150401	5	5	537	486	439	914	221	916	748	968	494	858	+	+	+	+	+	+	+	+	+	+
chr5	54144896	54145378	-1.01213	2.29107	9.3084	0.00228105	0.0892736	ENSG00000164283	3	1	50	44	54	69	52	48	23	51	21	28	-	+	+	+	-	-	-	+	-	-
chr5	71227950	71229162	-0.49396	5.70968	9.31002	0.00227905	0.0892736	ENSG00000131711	5	5	456	538	520	612	540	451	409	517	291	458	+	+	+	+	+	+	+	+	+	+
chr12	58922900	58923358	-0.846675	2.93149	9.30291	0.0022879	0.0893116	ENSG00000139263	5	2	93	85	62	82	88	49	31	70	56	61	+	+	+	+	+	-	-	+	+	-
chr12	33022959	33023571	-0.987552	2.33289	9.30325	0.00228748	0.0893116	ENSG00000057294	2	2	51	38	43	74	61	62	19	28	26	60	-	-	-	+	+	+	-	-	-	+
chr9	139922195	139923431	0.646116	4.6412	9.29185	0.00230176	0.0897857	ENSG00000107331	2	4	233	162	169	252	103	179	313	455	164	329	+	-	-	+	-	+	+	+	-	+
chr4	37891562	37893264	0.550663	6.00852	9.2856	0.00230963	0.0899587	ENSG00000065882	5	5	439	404	352	1006	321	595	915	740	508	984	+	+	+	+	+	+	+	+	+	+
chr6	1278339	1278816	0.88439	2.87128	9.28609	0.002309	0.0899587	ENSG00000164379	1	4	28	16	16	95	33	227	38	70	132	78	-	-	-	+	-	+	-	+	+	+
chr4	8200632	8201634	0.499998	5.49283	9.28255	0.00231347	0.0900415	ENSG00000125089	5	5	322	243	306	565	256	678	439	554	467	544	+	+	+	+	+	+	+	+	+	+
chr9	18759869	18760265	0.923526	3.11286	9.27601	0.00232174	0.0902964	ENSG00000178031	2	5	32	30	37	69	71	126	67	196	85	121	-	-	-	+	+	+	+	+	+	+
chr9	2655424	2655892	-0.946751	2.66571	9.27194	0.00232691	0.0904302	ENSG00000236404	3	2	67	44	58	103	65	99	41	48	19	50	+	-	+	+	-	+	-	+	-	-
chr16	46864598	46865703	0.484405	6.06002	9.26892	0.00233075	0.0905124	ENSG00000155330	5	5	562	460	536	839	295	568	817	840	460	991	+	+	+	+	+	+	+	+	+	+
chr9	126691851	126692756	0.621177	4.66805	9.26183	0.00233979	0.0907289	ENSG00000119522	5	5	211	150	199	304	105	263	315	381	214	274	+	+	+	+	+	+	+	+	+	+
chr16	81271966	81272658	-0.931058	2.68381	9.26188	0.00233972	0.0907289	ENSG00000140905	3	2	63	41	73	111	66	86	38	40	23	57	-	+	-	+	+	+	-	-	-	+
chr2	121102657	121104210	0.641028	4.16782	9.2579	0.00234482	0.0908565	ENSG00000144118	3	5	103	91	71	240	114	263	233	234	140	278	-	+	-	+	+	+	+	+	+	+
chr5	60626375	60628541	0.4664	7.4507	9.25214	0.0023522	0.0910752	ENSG00000130449	5	5	1285	1316	1279	2247	839	1935	2142	1929	1438	2385	+	+	+	+	+	+	+	+	+	+
chr15	47731384	47731775	-0.973377	2.30238	9.24867	0.00235666	0.0910927	ENSG00000137872	2	2	50	46	63	56	55	49	18	26	35	38	-	-	+	-	+	+	-	-	+	-
chr6	54757641	54757964	-0.814113	3.15927	9.24927	0.00235589	0.0910927	ENSG00000168143	5	4	77	117	99	98	99	59	59	67	37	82	+	+	+	+	+	-	+	+	+	+
chr21	17220979	17221806	-0.723887	3.66953	9.24774	0.00235787	0.0910927	ENSG00000155313	5	5	113	127	102	184	138	142	65	72	99	136	+	+	+	+	+	+	+	+	+	+
chr1	79798744	79799136	0.946065	2.48873	9.24315	0.00236378	0.0912538	ENSG00000162618	0	3	15	17	15	41	33	179	28	36	124	54	-	-	-	-	-	+	-	+	+	-
chr6	75977389	75978291	-0.621884	4.42782	9.24114	0.00236637	0.0912865	ENSG00000112697	5	5	166	220	218	336	214	204	160	115	176	167	+	+	+	+	+	+	+	+	+	+
chr3	50273201	50273884	0.517483	6.01093	9.23945	0.00236856	0.0913035	ENSG00000114353	5	5	434	420	532	798	334	666	699	946	587	741	+	+	+	+	+	+	+	+	+	+
chr2	7057214	7058344	0.631327	4.78516	9.23379	0.0023759	0.0914653	ENSG00000151692	5	5	231	169	174	390	93	318	389	378	214	304	+	+	+	+	+	+	+	+	+	+
chr4	6472141	6473049	0.642369	4.11184	9.23083	0.00237974	0.0914653	ENSG00000074211	5	5	105	92	104	238	81	259	172	204	183	249	+	+	+	+	+	+	+	+	+	+
chr7	73482066	73482618	-0.818259	3.03691	9.23125	0.0023792	0.0914653	ENSG00000106683	5	4	87	76	88	116	78	75	58	77	29	65	+	+	+	+	+	+	+	+	-	+
chr20	12745445	12745785	-1.03946	2.2754	9.23279	0.00237719	0.0914653	ENSG00000172296	4	1	50	52	72	54	47	34	18	40	19	39	+	+	+	+	-	-	-	+	-	-
chr9	73517541	73517935	-0.876772	2.9251	9.22809	0.00238331	0.0915353	ENSG00000119138	4	4	60	68	94	110	94	54	51	58	28	69	-	+	+	+	+	+	+	+	-	+
chr2	210550674	210551093	-0.91947	2.67078	9.2251	0.0023872	0.0916178	ENSG00000144406	3	3	71	38	59	107	62	80	16	47	62	46	+	-	-	+	+	+	-	+	+	-
chr20	62462134	62463262	0.645568	4.34538	9.22094	0.00239262	0.0916686	ENSG00000130584	3	4	172	152	135	211	72	104	395	322	87	246	-	+	+	-	+	+	+	+	-	+
chr10	26985947	26986976	0.589133	4.65124	9.22006	0.00239377	0.0916686	ENSG00000148459	5	5	192	128	162	378	95	418	285	268	218	335	+	+	+	+	+	+	+	+	+	+
chr3	125802318	125803462	0.541531	5.39397	9.22064	0.00239302	0.0916686	ENSG00000114544	5	5	292	282	297	585	157	585	458	587	328	544	+	+	+	+	+	+	+	+	+	+
chr9	108026703	108027020	-1.06485	2.35861	9.21689	0.00239793	0.0917607	ENSG00000070214	4	1	40	52	84	78	45	46	24	41	22	25	-	+	+	+	+	-	-	+	-	-
chr2	86450313	86450778	0.953875	2.22724	9.20944	0.0024077	0.0917994	ENSG00000132313	0	3	35	18	20	43	17	98	45	47	46	77	-	-	-	-	-	+	+	-	-	+
chr11	100555108	100555829	-0.620709	4.30422	9.21265	0.00240349	0.0917994	ENSG00000165895	5	3	208	197	167	250	220	146	141	157	119	195	+	+	+	+	+	-	+	-	+	+
chr11	27883566	27883865	-0.955912	2.32858	9.21062	0.00240615	0.0917994	ENSG00000169519	3	0	32	74	32	83	56	45	40	38	28	23	-	+	-	+	+	-	-	-	-	-
chr7	138749990	138750387	1.16967	2.1514	9.21465	0.00240086	0.0917994	ENSG00000146858	0	3	14	23	8	40	9	157	42	59	49	36	-	-	-	-	-	+	-	+	+	-
chr5	70700342	70700726	-1.14284	2.50166	9.21161	0.00240485	0.0917994	ENSG00000145734	4	4	57	37	64	62	78	74	11	48	27	57	+	-	+	+	+	+	-	+	+	+
chr3	143048417	143049289	0.57574	4.57069	9.20604	0.00241218	0.0919031	ENSG00000175040	5	5	114	92	96	315	183	521	209	236	276	338	+	+	+	+	+	+	+	+	+	+
chr2	128265981	128266660	-0.758519	3.87637	9.20363	0.00241536	0.0919575	ENSG00000163166	5	5	143	154	163	212	129	153	118	76	54	152	+	+	+	+	+	+	+	+	+	+
chr2	44706404	44707016	-0.779116	3.33191	9.20113	0.00241865	0.091984	ENSG00000143919	4	4	89	103	78	160	91	138	46	88	78	70	+	+	-	+	+	+	-	+	+	+
chr6	131456279	131457456	0.491179	5.96007	9.20044	0.00241957	0.091984	ENSG00000118507	5	5	458	319	288	900	352	1037	657	742	577	861	+	+	+	+	+	+	+	+	+	+
chr18	47720682	47722008	0.505252	5.84645	9.19252	0.00243006	0.092316	ENSG00000167306	5	5	397	358	375	918	235	715	653	739	444	836	+	+	+	+	+	+	+	+	+	+
chr22	46545725	46547270	0.583096	5.19848	9.18914	0.00243456	0.0924197	ENSG00000186951	5	5	367	272	278	435	117	228	535	515	221	486	+	+	+	+	+	+	+	+	+	+
chr2	192542164	192543560	0.460029	6.94127	9.18566	0.00243918	0.0925282	ENSG00000173559	5	5	974	881	856	1531	579	1516	1294	1393	1052	1805	+	+	+	+	+	+	+	+	+	+
chr2	68595814	68596319	-0.872902	2.70578	9.1829	0.00244287	0.0925342	ENSG00000119865	3	4	47	57	32	113	88	74	28	77	36	59	-	+	-	+	+	+	-	+	+	+
chr6	135256296	135256584	-0.883317	2.54391	9.18404	0.00244134	0.0925342	ENSG00000112339	3	2	48	53	45	84	82	49	26	43	61	30	-	+	-	+	+	-	-	+	+	-
chr2	226358613	226359309	-0.831005	3.45832	9.17851	0.00244873	0.0925552	ENSG00000135905	5	4	90	92	145	151	135	100	101	65	39	76	+	+	+	+	+	+	+	+	+	-
chr2	105946020	105946839	0.598085	4.47031	9.17946	0.00244747	0.0925552	ENSG00000135966	5	5	178	129	114	281	96	311	231	287	177	369	+	+	+	+	+	+	+	+	+	+
chr1	50526058	50526407	-0.971025	2.49691	9.18046	0.00244612	0.0925552	ENSG00000162374	5	1	75	46	69	63	68	30	30	39	22	55	+	+	+	+	+	-	-	+	-	-
chr6	4775520	4777019	0.494177	6.27283	9.17437	0.00245428	0.0925967	ENSG00000153046	5	5	661	547	517	1013	323	748	1053	1079	515	970	+	+	+	+	+	+	+	+	+	+
chr4	1857306	1858580	0.53458	5.80982	9.17374	0.00245513	0.0925967	ENSG00000168924	5	5	375	412	314	728	274	570	616	882	447	827	+	+	+	+	+	+	+	+	+	+
chr1	90879825	90880308	0.755052	4.24302	9.17499	0.00245344	0.0925967	ENSG00000162664	5	5	79	63	74	199	174	268	167	403	188	240	+	+	+	+	+	+	+	+	+	+
chr10	54635965	54636876	0.796313	3.10001	9.17138	0.00245829	0.0926493	ENSG00000107984	0	5	66	41	32	70	56	130	89	95	102	131	-	-	-	-	-	+	+	+	+	+
chr14	55538483	55539194	-0.737285	3.82587	9.16706	0.0024641	0.0926683	ENSG00000168175	5	5	97	149	116	174	194	142	63	149	101	114	+	+	+	+	+	+	+	+	+	+
chr5	124317475	124317977	-0.892699	2.71071	9.16779	0.00246312	0.0926683	ENSG00000168916	5	3	77	49	90	103	60	58	48	34	36	32	+	+	+	+	+	+	+	-	+	-
chr6	3068461	3069493	0.503639	5.9291	9.16825	0.0024625	0.0926683	ENSG00000137275	5	5	380	418	383	859	286	788	648	863	502	846	+	+	+	+	+	+	+	+	+	+
chr7	81787700	81788018	-0.975536	2.1768	9.16281	0.00246983	0.0927505	ENSG00000153956	3	1	27	48	41	75	57	47	23	33	25	33	-	+	+	+	-	-	-	+	-	-
chr5	14268298	14268652	-0.647356	4.06455	9.1634	0.00246904	0.0927505	ENSG00000038382	5	4	155	196	161	188	177	137	125	152	80	143	+	+	+	+	+	-	+	+	+	+
chr17	4710042	4710791	0.70211	4.21125	9.15632	0.00247861	0.0928434	ENSG00000129219	4	5	182	119	161	204	51	128	261	305	113	210	+	+	+	+	-	+	+	+	+	+
chr11	121405490	121406593	-0.614271	4.36217	9.15574	0.00247939	0.0928434	ENSG00000137642	5	5	181	181	143	274	220	287	82	172	179	222	+	+	+	+	+	+	+	+	+	+
chr4	149124299	149125032	-0.60635	4.54028	9.15776	0.00247665	0.0928434	ENSG00000151623	5	5	244	200	158	330	193	436	136	196	115	248	+	+	+	+	+	+	+	+	+	+
chr4	18851894	18852866	-0.78505	3.57237	9.15663	0.00247819	0.0928434	ENSG00000178177	4	2	91	134	100	193	123	145	80	54	74	112	-	+	+	+	+	+	-	-	+	-
chr7	106787846	106788354	-0.982656	2.29939	9.15314	0.00248292	0.0929089	ENSG00000105856	3	3	42	52	32	73	45	91	16	31	43	30	-	+	-	+	+	+	-	-	+	+
chr7	12471425	12471992	-0.948466	2.86787	9.15002	0.00248716	0.0929442	ENSG00000146530	3	3	45	72	30	202	70	68	111	50	20	27	-	+	-	+	+	+	+	+	-	-
chr14	42237592	42238655	-0.899772	3.86154	9.14983	0.00248741	0.0929442	ENSG00000165379	5	5	104	84	136	247	228	182	72	67	73	183	+	+	+	+	+	+	+	+	+	+
chr9	68401065	68401912	-0.823966	3.74438	9.14617	0.0024924	0.092998	ENSG00000170161	4	4	217	91	169	161	120	103	102	67	44	134	+	+	+	+	-	+	+	+	-	+
chr3	127391086	127392388	0.543053	5.18261	9.14641	0.00249207	0.092998	ENSG00000114626	5	5	263	187	228	550	175	433	435	532	289	461	+	+	+	+	+	+	+	+	+	+
chr3	156499410	156499796	-0.866403	2.67587	9.14218	0.00249783	0.0931343	ENSG00000240875	3	0	82	52	81	100	55	48	52	32	30	40	+	-	+	+	-	-	-	-	-	-
chr6	55623081	55623819	-0.718449	3.85705	9.13864	0.00250267	0.0931854	ENSG00000112175	5	5	81	118	122	295	155	211	92	138	81	104	+	+	+	+	+	+	+	+	+	+
chr6	1609943	1610864	0.639031	4.20847	9.13858	0.00250276	0.0931854	ENSG00000054598	4	5	143	83	155	268	76	158	362	178	100	233	-	+	+	+	+	+	+	+	+	+
chr11	2950094	2951333	0.533337	5.13409	9.13693	0.002505	0.0931942	ENSG00000181649	4	4	327	258	376	388	113	227	579	405	185	389	+	+	+	+	-	+	+	+	-	+
chr17	66755670	66756248	-0.732596	3.5137	9.13451	0.00250833	0.0931942	ENSG00000108950	4	4	95	108	100	238	88	128	76	97	63	91	-	+	+	+	+	+	+	+	-	+
chr8	51029353	51030296	-0.841231	3.68606	9.13457	0.00250824	0.0931942	ENSG00000147481	3	3	102	107	104	190	185	122	52	58	99	172	-	+	-	+	+	+	-	-	+	+
chr10	58775358	58776397	0.914819	4.73402	9.11717	0.00253221	0.0933461	ENSG00000122952	4	5	143	70	108	235	183	742	407	261	165	393	+	+	-	+	+	+	+	+	+	+
chr1	231493699	231494001	-0.946807	2.26387	9.11704	0.0025324	0.0933461	ENSG00000116903	3	1	47	43	53	75	53	28	33	45	17	35	-	-	+	+	+	-	-	+	-	-
chr2	242575883	242577487	0.537367	5.34626	9.11419	0.00253635	0.0933461	ENSG00000176946	5	5	390	217	282	530	167	416	545	600	242	540	+	+	+	+	+	+	+	+	+	+
chr8	87526364	87527383	0.462752	6.4967	9.12088	0.00252709	0.0933461	ENSG00000176623	5	5	598	598	543	1106	520	1325	821	1052	852	1432	+	+	+	+	+	+	+	+	+	+
chr20	11667538	11668825	-0.461647	5.9512	9.11354	0.00253724	0.0933461	ENSG00000132640	5	5	496	533	438	927	640	824	408	603	459	571	+	+	+	+	+	+	+	+	+	+
chr7	45872342	45872765	0.848114	2.73536	9.1259	0.00252016	0.0933461	ENSG00000214765	1	5	22	31	16	43	60	180	61	91	69	74	-	-	-	-	+	+	+	+	+	+
chr21	26671870	26672386	-0.926445	2.4435	9.12446	0.00252215	0.0933461	ENSG00000154719	4	3	53	57	46	42	96	45	27	38	36	33	+	-	+	+	+	+	-	+	+	-
chr20	60640342	60641762	0.640027	5.25555	9.11345	0.00253736	0.0933461	ENSG00000130699	4	5	393	270	310	458	98	180	717	535	190	403	+	+	+	+	-	+	+	+	+	+
chr4	43279092	43279292	-1.08513	1.81653	9.12506	0.00252131	0.0933461	ENSG00000124406	3	0	29	30	49	60	42	20	21	9	17	32	-	-	+	+	+	-	-	-	-	-
chr1	222990878	222991262	-0.638535	4.35623	9.12305	0.00252409	0.0933461	ENSG00000154309	5	5	186	183	203	254	243	180	164	197	89	179	+	+	+	+	+	+	+	+	+	+
chr7	124956417	124957087	-0.771016	3.59562	9.12394	0.00252286	0.0933461	ENSG00000128513	4	5	94	113	96	173	163	100	64	132	63	118	-	+	+	+	+	+	+	+	+	+
chr12	72483390	72484282	-0.634504	4.44085	9.11932	0.00252924	0.0933461	ENSG00000121749	5	5	156	244	208	256	269	214	145	109	189	170	+	+	+	+	+	+	+	+	+	+
chr13	80075862	80076434	-0.971646	2.37329	9.11576	0.00253417	0.0933461	ENSG00000102471	2	2	53	51	48	84	37	75	29	50	13	41	-	+	-	+	-	+	-	+	-	-
chr10	59824939	59825281	-1.00672	2.15729	9.1143	0.00253619	0.0933461	ENSG00000151151	3	1	26	49	26	78	57	68	23	20	27	37	-	+	-	+	+	+	-	-	-	-
chr14	31559814	31561040	-0.594191	4.4956	9.10984	0.00254237	0.0934648	ENSG00000196792	5	5	215	172	248	365	211	232	180	177	128	174	+	+	+	+	+	+	+	+	+	+
chr5	20559901	20560448	-0.525688	5.325	9.10585	0.00254794	0.0936037	ENSG00000145526	5	5	301	295	285	564	480	676	230	372	282	373	+	+	+	+	+	+	+	+	+	+
chr8	93698734	93699132	0.915268	2.50818	9.1026	0.00255247	0.0937044	ENSG00000205133	0	4	19	23	23	40	36	156	39	49	99	60	-	-	-	-	-	+	-	+	+	+
chr3	25824371	25825571	0.459332	6.53101	9.10001	0.00255608	0.0937713	ENSG00000151093	5	5	647	612	557	1252	471	1380	1007	1068	762	1337	+	+	+	+	+	+	+	+	+	+
chr18	74961313	74963135	0.681524	3.95896	9.09284	0.00256613	0.094074	ENSG00000197971	1	4	103	73	83	151	107	245	168	143	251	140	-	-	-	+	-	+	+	-	+	+
chr18	702855	703879	-0.588959	4.49259	9.08867	0.00257198	0.09422	ENSG00000132199	5	5	202	242	221	327	197	222	167	162	147	188	+	+	+	+	+	+	+	+	+	+
chr9	99646510	99647073	-0.920555	2.82685	9.08678	0.00257463	0.09422	ENSG00000196597	3	2	56	54	109	126	73	19	79	46	13	61	-	-	+	+	+	-	+	+	-	-
chr7	22509040	22509639	0.803385	3.40279	9.08616	0.00257551	0.09422	ENSG00000136237	2	5	30	26	16	100	73	385	53	90	219	73	-	-	-	+	+	+	+	+	+	+
chr2	13657277	13657999	1.04214	2.56051	9.08115	0.00258257	0.0944125	ENSG00000071575	1	4	17	2	13	86	20	246	18	42	108	54	-	-	-	+	-	+	-	+	+	+
chr4	85503538	85504932	0.463526	6.81823	9.07975	0.00258456	0.0944193	ENSG00000163624	5	5	777	752	757	1504	611	1345	1191	1322	993	1712	+	+	+	+	+	+	+	+	+	+
chr4	166410949	166411312	-0.854091	2.96768	9.07618	0.00258961	0.0945378	ENSG00000109472	5	2	83	91	84	112	67	45	32	69	54	64	+	+	+	+	+	-	-	+	+	-
chr6	81320565	81320890	-0.914029	3.21024	9.06442	0.00260632	0.0950816	ENSG00000083123	4	4	65	61	84	184	99	193	61	45	35	72	-	+	+	+	+	+	+	+	-	+
chr3	63979247	63979743	-0.820703	2.96032	9.05815	0.00261526	0.0952109	ENSG00000163636	5	1	89	79	84	107	63	84	49	62	32	61	+	+	+	+	+	-	-	+	-	-
chr17	11923864	11924851	0.586296	4.82686	9.05841	0.0026149	0.0952109	ENSG00000065559	5	5	250	210	221	349	86	333	382	312	196	372	+	+	+	+	+	+	+	+	+	+
chr13	60586556	60587068	-0.860335	2.79873	9.05812	0.00261531	0.0952109	ENSG00000083544	4	1	90	63	93	136	39	32	44	49	37	45	+	+	+	+	-	-	-	+	-	-
chr2	217404318	217405114	-0.482793	5.82512	9.05306	0.00262256	0.0953422	ENSG00000197756	5	5	459	525	386	803	636	603	376	588	377	597	+	+	+	+	+	+	+	+	+	+
chr11	122526132	122527533	0.51598	5.11074	9.0531	0.0026225	0.0953422	ENSG00000154127	5	5	234	200	209	468	183	525	395	426	302	439	+	+	+	+	+	+	+	+	+	+
chr9	3401388	3401872	-0.642943	4.18628	9.05083	0.00262576	0.0953923	ENSG00000080298	5	5	141	177	168	238	225	185	120	137	113	171	+	+	+	+	+	+	+	+	+	+
chr3	2939524	2939925	-0.812262	2.95325	9.04944	0.00262775	0.0953985	ENSG00000072756	5	5	80	90	59	95	90	57	36	51	60	76	+	+	+	+	+	+	+	+	+	+
chr18	35030412	35030924	0.633422	4.19922	9.04753	0.00263051	0.0954324	ENSG00000101489	4	5	89	74	56	274	117	432	200	195	167	262	+	+	-	+	+	+	+	+	+	+
chr16	11349226	11350531	0.558672	5.56019	9.0341	0.00264989	0.0960691	ENSG00000185338	5	5	432	362	520	520	145	302	738	586	307	428	+	+	+	+	+	+	+	+	+	+
chr3	101497730	101498726	0.449276	6.54923	9.02891	0.00265742	0.096209	ENSG00000144815	5	5	625	610	579	1134	547	1445	887	1105	816	1447	+	+	+	+	+	+	+	+	+	+
chr10	42647656	42648377	-0.910596	2.86469	9.02996	0.00265591	0.096209	ENSG00000185904	5	3	100	81	101	68	72	34	42	22	34	78	+	+	+	+	+	-	+	-	+	+
chr18	12606796	12607527	-0.693747	3.9152	9.02728	0.0026598	0.0962287	ENSG00000134278	5	5	144	94	174	248	164	149	89	109	92	141	+	+	+	+	+	+	+	+	+	+
chr6	143930483	143930976	-0.792323	3.29	9.0257	0.0026621	0.0962452	ENSG00000112419	5	3	93	115	90	117	104	96	54	61	49	111	+	+	+	+	+	-	+	-	+	+
chr2	177511950	177512721	0.818624	3.13227	9.02232	0.00266702	0.0963567	ENSG00000128654	1	5	27	16	28	114	58	313	65	60	110	107	-	-	-	+	-	+	+	+	+	+
chr6	22975167	22975693	-0.880287	2.70829	9.01937	0.00267133	0.096446	ENSG00000152954	4	3	45	60	42	106	81	74	19	39	77	57	+	+	-	+	+	+	-	-	+	+
chr1	50589703	50590028	-1.04533	2.88769	9.01805	0.00267326	0.0964491	ENSG00000162374	3	1	79	107	55	38	144	41	32	27	36	74	+	+	-	-	+	-	+	-	-	-
chr1	142655903	142656347	-0.922312	3.75244	9.0141	0.00267905	0.0965914	ENSG00000196369	5	3	204	116	142	155	130	131	129	72	30	110	+	+	+	+	+	+	-	+	-	+
chr10	93979335	93979649	-0.986857	2.12829	9.01192	0.00268224	0.0966399	ENSG00000107864	3	1	44	39	34	60	51	58	17	21	26	47	+	-	-	+	+	+	-	-	-	-
chr8	82542556	82543428	0.576201	4.53669	9.01018	0.0026848	0.0966658	ENSG00000133731	5	5	145	146	107	243	138	443	209	253	277	303	+	+	+	+	+	+	+	+	+	+
chr8	23539623	23540901	0.500585	5.60577	9.00776	0.00268836	0.0966737	ENSG00000167034	5	5	284	305	307	676	230	842	444	600	436	717	+	+	+	+	+	+	+	+	+	+
chr8	40013784	40014238	-1.00654	3.15468	9.00626	0.00269056	0.0966737	ENSG00000176907	4	4	58	106	88	134	115	63	44	51	32	123	-	+	+	+	+	+	-	+	+	+
chr14	32699266	32700035	-0.616839	4.36569	9.00668	0.00268994	0.0966737	ENSG00000151320	5	5	202	164	166	262	263	219	128	161	140	202	+	+	+	+	+	+	+	+	+	+
chr9	43133662	43135195	0.497726	5.43821	9.00366	0.00269439	0.0967451	ENSG00000215126	5	5	378	252	292	412	214	846	329	375	449	695	+	+	+	+	+	+	+	+	+	+
chr18	48085730	48087638	0.5126	5.73829	9.00238	0.00269628	0.0967466	ENSG00000141639	5	5	337	341	250	783	276	773	579	730	496	705	+	+	+	+	+	+	+	+	+	+
chr6	145079808	145080026	-1.05501	2.31742	8.99752	0.00270346	0.0968715	ENSG00000152818	3	0	50	42	62	50	87	23	34	22	18	43	-	-	+	+	+	-	-	-	-	-
chr8	15502804	15503617	-0.629647	4.22197	8.9978	0.00270304	0.0968715	ENSG00000104723	5	5	172	194	170	252	181	198	110	123	125	201	+	+	+	+	+	+	+	+	+	+
chr7	140264423	140264923	-0.668294	3.95066	8.99598	0.00270574	0.096887	ENSG00000133606	5	5	123	131	140	223	197	146	95	143	101	128	+	+	+	+	+	+	+	+	+	+
chr16	62415891	62416438	-1.14566	2.30168	8.99188	0.00271182	0.0970383	ENSG00000150394	3	1	63	30	10	77	85	42	21	64	28	29	+	-	-	+	+	-	-	+	-	-
chr6	52226448	52227591	0.526106	5.21552	8.98817	0.00271733	0.0970973	ENSG00000170915	5	5	195	226	174	512	236	559	376	469	349	575	+	+	+	+	+	+	+	+	+	+
chr6	105307254	105308250	0.445886	6.49143	8.98703	0.00271903	0.0970973	ENSG00000085382	5	5	575	529	447	1158	573	1589	855	1082	805	1337	+	+	+	+	+	+	+	+	+	+
chr3	160351803	160352208	-0.930786	2.23165	8.98919	0.00271581	0.0970973	ENSG00000179674	3	3	44	34	28	70	70	59	23	34	37	27	+	-	-	+	+	+	-	+	+	-
chr11	101737342	101737726	-0.94402	2.41163	8.98168	0.002727	0.0972172	ENSG00000110318	3	1	60	37	76	103	40	36	55	31	13	29	-	-	+	+	+	-	-	+	-	-
chr10	23794834	23795302	-1.12712	1.87611	8.98104	0.00272795	0.0972172	ENSG00000165312	3	1	25	31	21	42	50	81	7	25	38	14	-	+	-	+	+	+	-	-	-	-
chr5	123969956	123971083	-0.600029	4.71002	8.98141	0.0027274	0.0972172	ENSG00000168916	5	5	246	270	239	287	276	298	146	203	151	304	+	+	+	+	+	+	+	+	+	+
chr12	21179207	21179758	-0.606124	4.99372	8.97975	0.00272989	0.09722	ENSG00000121351	5	5	232	302	232	407	508	217	229	231	221	322	+	+	+	+	+	+	+	+	+	+
chr12	92172590	92173188	-0.570899	4.54952	8.97794	0.00273259	0.09725	ENSG00000257242	5	5	212	235	205	333	235	237	190	174	143	202	+	+	+	+	+	+	+	+	+	+
chr6	116331905	116333090	-0.55476	4.96676	8.96431	0.00275304	0.0977445	ENSG00000111816	5	5	258	318	252	430	323	379	200	204	225	337	+	+	+	+	+	+	+	+	+	+
chr13	44452988	44454347	0.452949	6.17491	8.96183	0.00275678	0.0977445	ENSG00000179630	5	5	491	438	462	1017	357	1148	779	925	532	1010	+	+	+	+	+	+	+	+	+	+
chr9	34522772	34523596	0.485623	5.80731	8.96124	0.00275768	0.0977445	ENSG00000168913	5	5	376	358	372	742	282	694	579	840	411	828	+	+	+	+	+	+	+	+	+	+
chr4	68105693	68106290	0.823569	2.81711	8.96353	0.00275422	0.0977445	ENSG00000145241	1	4	22	32	27	69	52	149	61	58	116	87	-	-	-	+	-	+	+	-	+	+
chr5	63590689	63591378	0.815387	4.1254	8.96198	0.00275656	0.0977445	ENSG00000164197	3	5	93	57	45	109	187	420	188	204	152	273	+	-	-	+	+	+	+	+	+	+
chr3	153022971	153023721	0.530646	5.06737	8.96203	0.00275649	0.0977445	ENSG00000181467	5	5	149	141	103	415	250	892	220	305	436	508	+	+	+	+	+	+	+	+	+	+
chr1	237261835	237262260	-0.907208	2.7147	8.95949	0.00276032	0.0977587	ENSG00000198626	5	3	88	50	65	102	60	48	38	44	20	86	+	+	+	+	+	-	+	+	-	+
chr14	35665775	35666663	-0.706229	3.93998	8.9585	0.00276181	0.0977587	ENSG00000092020	5	5	106	218	121	196	155	175	100	127	104	101	+	+	+	+	+	+	+	+	+	+
chr7	105234658	105234901	1.08252	2.28018	8.95694	0.00276418	0.0977765	ENSG00000135249	0	4	27	8	21	38	26	147	55	36	37	80	-	-	-	-	-	+	+	-	+	+
chr12	95001428	95002441	-0.672003	4.24026	8.95287	0.00277034	0.0977965	ENSG00000057704	5	5	148	193	153	272	198	235	100	132	110	241	+	+	+	+	+	+	+	+	+	+
chr14	31732846	31733112	-0.878342	3.20395	8.95474	0.0027675	0.0977965	ENSG00000092148	4	2	115	62	124	114	107	50	61	74	31	86	+	+	+	-	+	-	+	+	-	-
chr4	56261550	56263118	0.462149	6.95004	8.95395	0.0027687	0.0977965	ENSG00000134851	5	5	790	885	709	1567	705	1721	1271	1459	1088	1905	+	+	+	+	+	+	+	+	+	+
chr4	190842273	190843062	-0.793592	3.71315	8.94813	0.00277754	0.0978542	ENSG00000109536	5	5	150	108	124	158	167	138	113	75	53	108	+	+	+	+	+	+	+	+	+	+
chr2	113238350	113240571	0.474156	6.16248	8.94848	0.00277701	0.0978542	ENSG00000114999	5	5	538	452	410	968	404	835	911	850	561	1027	+	+	+	+	+	+	+	+	+	+
chr5	80032660	80032949	-0.955387	2.36959	8.9481	0.00277758	0.0978542	ENSG00000228716	3	1	44	72	62	51	56	43	22	32	30	40	-	+	+	-	+	-	-	+	-	-
chr4	106145337	106146115	-0.693461	4.13298	8.94547	0.00278158	0.0979292	ENSG00000168769	5	5	181	166	147	212	222	163	115	89	111	195	+	+	+	+	+	+	+	+	+	+
chr12	93484496	93484852	-0.882835	2.40455	8.94419	0.00278354	0.0979323	ENSG00000102189	4	1	47	51	56	86	58	37	36	43	30	30	-	+	+	+	+	-	-	+	-	-
chr10	133849754	133850883	0.744889	3.83866	8.93816	0.00279275	0.0981244	ENSG00000176171	1	5	102	55	75	201	62	209	130	220	166	177	-	-	-	+	-	+	+	+	+	+
chr10	14645664	14646983	0.50631	5.75484	8.93916	0.00279121	0.0981244	ENSG00000151474	5	5	385	365	303	742	287	579	689	686	472	703	+	+	+	+	+	+	+	+	+	+
chr6	52674317	52674825	-0.768399	3.83222	8.93014	0.00280503	0.0984239	ENSG00000243955	5	5	71	168	52	258	180	178	63	116	144	117	+	+	+	+	+	+	+	+	+	+
chr1	95582246	95583598	0.51609	5.84018	8.93133	0.0028032	0.0984239	ENSG00000152078	5	5	410	447	349	670	242	948	682	720	431	695	+	+	+	+	+	+	+	+	+	+
chr14	33631991	33633152	-0.704314	3.83272	8.92824	0.00280795	0.0984605	ENSG00000151322	5	3	115	137	84	214	155	257	88	98	77	142	+	+	+	+	+	+	-	-	+	+
chr1	143534646	143535127	-0.973615	3.26533	8.91675	0.00282567	0.0989	ENSG00000196369	3	1	148	67	104	117	111	77	91	44	25	78	+	-	+	+	-	-	+	-	-	-
chr4	54187383	54188005	-0.809044	2.86584	8.91832	0.00282324	0.0989	ENSG00000184178	5	3	63	102	67	93	74	52	46	50	48	53	+	+	+	+	+	+	-	+	+	-
chr21	9719614	9720149	-1.31184	1.78928	8.91644	0.00282614	0.0989	ENSG00000188681	4	3	72	21	49	36	31	24	26	10	4	24	+	+	+	+	-	+	+	-	-	+
chr5	131831470	131832983	0.446967	6.26335	8.91399	0.00282994	0.0989668	ENSG00000125347	5	5	648	485	623	926	366	988	851	913	569	1041	+	+	+	+	+	+	+	+	+	+
chr3	9811295	9811868	0.71891	3.97899	8.9084	0.00283862	0.0991378	ENSG00000134072	4	5	72	67	118	222	71	304	152	213	165	171	-	+	+	+	+	+	+	+	+	+
chr4	159689717	159690916	0.499919	6.04035	8.90848	0.0028385	0.0991378	ENSG00000052795	5	5	462	379	300	865	417	828	851	867	432	1079	+	+	+	+	+	+	+	+	+	+
chr9	100772776	100773053	-0.94322	2.30461	8.90425	0.00284508	0.0991652	ENSG00000136938	3	0	43	58	57	72	46	41	23	20	37	42	-	-	+	+	+	-	-	-	-	-
chr10	126604890	126606383	0.512488	6.05999	8.90444	0.00284477	0.0991652	ENSG00000019995	5	5	508	495	461	878	289	657	790	892	582	835	+	+	+	+	+	+	+	+	+	+
chr10	97802946	97804290	0.461715	5.85556	8.90451	0.00284468	0.0991652	ENSG00000107443	5	5	376	355	355	755	342	879	579	670	556	798	+	+	+	+	+	+	+	+	+	+
chr19	38852140	38853380	0.58342	4.54723	8.90007	0.00285159	0.0993261	ENSG00000099341	5	5	215	203	216	173	99	167	264	350	150	321	+	+	+	+	+	+	+	+	+	+
chr14	69926888	69927259	-0.859679	2.66859	8.89421	0.00286077	0.0995795	ENSG00000100632	2	2	47	56	43	90	100	58	38	67	29	52	-	-	-	+	+	-	+	+	-	-
chr1	148875928	148876256	-1.31723	1.38889	8.88933	0.00286841	0.0997793	ENSG00000232527	3	0	41	33	32	16	24	15	14	26	1	18	+	+	+	-	-	-	-	-	-	-
chr6	152375537	152376001	-0.652456	4.02094	8.88608	0.00287353	0.0998248	ENSG00000091831	5	5	146	122	134	276	199	153	130	98	104	150	+	+	+	+	+	+	+	+	+	+
chr2	61108115	61109147	0.472895	6.11132	8.88617	0.00287339	0.0998248	ENSG00000162924	5	5	515	487	463	879	342	793	757	932	575	931	+	+	+	+	+	+	+	+	+	+
chr13	76209416	76211115	0.504813	5.3893	8.88223	0.0028796	0.0998369	ENSG00000136153	5	5	324	194	227	575	243	630	437	540	357	611	+	+	+	+	+	+	+	+	+	+
chr6	117803321	117804821	0.451503	6.99464	8.88287	0.00287859	0.0998369	ENSG00000164465	5	5	838	844	755	1509	784	1864	1266	1553	995	2130	+	+	+	+	+	+	+	+	+	+
chr4	170191344	170192786	0.536162	6.46993	8.88359	0.00287745	0.0998369	ENSG00000154447	5	5	503	668	481	1264	424	1181	1041	943	749	1470	+	+	+	+	+	+	+	+	+	+
chr11	41399147	41399594	-0.830676	3.17269	8.87977	0.00288347	0.099839	ENSG00000166181	4	4	60	47	49	163	146	131	36	103	61	64	+	+	-	+	+	+	-	+	+	+
chr7	33431708	33432134	0.766511	3.24915	8.87992	0.00288325	0.099839	ENSG00000122507	2	5	46	32	27	95	72	245	84	77	141	113	-	-	-	+	+	+	+	+	+	+
chr18	39994511	39995340	-0.771734	3.58578	8.87639	0.00288882	0.0999025	ENSG00000078142	4	4	120	110	138	195	96	118	83	128	52	70	-	+	+	+	+	+	+	+	+	-
chr2	55278206	55278609	-0.599683	4.50623	8.8762	0.00288912	0.0999025	ENSG00000115310	5	2	200	195	208	329	260	206	181	185	112	235	+	+	+	+	+	+	-	+	-	-
chr8	119079670	119080320	-0.784021	2.96302	8.87162	0.00289638	0.100088	ENSG00000182197	5	4	80	86	76	119	63	70	47	64	38	70	+	+	+	+	+	+	-	+	+	+
chr7	150812206	150812686	0.898334	2.68659	8.86964	0.00289953	0.10013	ENSG00000133612	0	3	49	29	25	81	26	58	103	96	57	80	-	-	-	-	-	+	+	+	-	-
chr2	115512389	115513207	-0.633615	4.05359	8.86779	0.00290246	0.100154	ENSG00000175497	5	5	145	158	176	286	146	127	128	124	89	160	+	+	+	+	+	+	+	+	+	+
chr9	131314333	131315461	0.501382	5.79657	8.8668	0.00290404	0.100154	ENSG00000197694	5	5	423	442	510	664	225	371	757	769	349	714	+	+	+	+	+	+	+	+	+	+
chr6	35569228	35569911	-0.885911	2.79803	8.86461	0.00290753	0.100157	ENSG00000007866	3	2	73	51	51	117	70	76	44	99	21	49	-	+	-	+	+	+	-	+	-	-
chr8	41753616	41755369	0.611242	4.33635	8.86434	0.00290796	0.100157	ENSG00000029534	4	5	141	111	95	294	88	312	240	265	164	284	+	+	+	+	-	+	+	+	+	+
chr3	148897783	148898273	-0.793781	3.07132	8.85789	0.00291825	0.100423	ENSG00000047457	5	4	70	76	118	174	53	58	77	61	24	65	+	+	+	+	+	+	+	+	-	+
chr3	23986444	23988161	0.470616	7.39324	8.85709	0.00291952	0.100423	ENSG00000197885	5	5	1231	1241	1037	2286	753	2112	1822	2094	1376	2465	+	+	+	+	+	+	+	+	+	+
chr2	180811809	180812315	0.85614	2.77916	8.85529	0.00292241	0.10044	ENSG00000163510	1	4	25	19	23	66	56	190	72	70	67	88	-	-	-	-	+	+	+	+	+	-
chr6	116421585	116422654	0.45594	7.03927	8.8544	0.00292383	0.10044	ENSG00000178425	5	5	912	868	740	1686	757	1827	1276	1527	1201	2105	+	+	+	+	+	+	+	+	+	+
chr15	64540029	64540627	-0.801292	3.21031	8.8526	0.00292672	0.100473	ENSG00000166794	5	5	86	74	84	131	117	101	62	70	38	92	+	+	+	+	+	+	+	+	+	+
chr12	33070036	33070616	-0.894789	2.44066	8.84828	0.00293366	0.100645	ENSG00000057294	3	1	47	41	37	115	59	55	35	40	20	60	+	+	-	+	-	-	+	-	-	-
chr2	74881019	74881899	0.464299	6.52585	8.84366	0.00294109	0.100834	ENSG00000135622	5	5	621	616	656	1005	540	1292	798	1268	875	1250	+	+	+	+	+	+	+	+	+	+
chr7	28429157	28429913	-0.861744	2.68248	8.84185	0.002944	0.100868	ENSG00000146592	4	1	56	68	71	94	71	54	48	28	33	53	-	+	+	+	+	-	-	-	-	+
chr4	36245458	36246559	0.55833	5.42372	8.81843	0.00298203	0.10092	ENSG00000047365	5	5	321	339	272	505	190	528	660	465	352	450	+	+	+	+	+	+	+	+	+	+
chr13	45024677	45025013	-0.938227	2.36646	8.81662	0.00298499	0.10092	ENSG00000151778	2	2	47	39	56	86	57	60	31	28	21	47	-	-	-	+	+	-	-	+	-	+
chr10	95753334	95754265	0.53147	5.09174	8.83515	0.00295484	0.10092	ENSG00000138193	5	5	208	211	188	469	170	517	344	507	296	453	+	+	+	+	+	+	+	+	+	+
chr19	48111401	48112588	0.565542	4.76864	8.82967	0.00296373	0.10092	ENSG00000063169	5	5	217	184	224	306	110	239	395	447	151	309	+	+	+	+	+	+	+	+	+	+
chr8	95030747	95031111	-0.884754	3.0141	8.83269	0.00295881	0.10092	ENSG00000164951	4	3	86	81	87	82	109	42	46	71	30	82	+	+	+	-	+	-	-	+	+	+
chr4	1871954	1873761	0.487453	5.98148	8.82209	0.00297605	0.10092	ENSG00000109685	5	5	521	437	489	854	255	507	972	871	371	741	+	+	+	+	+	+	+	+	+	+
chr9	133319982	133320621	0.747352	3.80188	8.81468	0.00298817	0.10092	ENSG00000130707	3	5	84	105	151	146	46	100	184	210	111	153	-	+	+	+	-	+	+	+	+	+
chr4	152090407	152090710	0.885703	2.43799	8.81733	0.00298383	0.10092	ENSG00000109686	0	5	32	32	20	47	28	90	68	56	47	92	-	-	-	-	-	+	+	+	+	+
chr1	90286187	90287659	0.467234	6.3405	8.82644	0.00296897	0.10092	ENSG00000171492	5	5	590	478	430	1035	464	1159	807	1031	591	1447	+	+	+	+	+	+	+	+	+	+
chr20	10289945	10290331	-0.835952	2.83693	8.83786	0.00295044	0.10092	ENSG00000132639	4	4	49	58	44	149	64	129	26	42	59	69	-	+	+	+	+	+	-	+	+	+
chr10	19043179	19043911	-0.852323	3.29006	8.8235	0.00297375	0.10092	ENSG00000165997	3	4	93	113	73	84	169	92	84	43	51	59	+	+	-	-	+	+	+	-	+	+
chr22	19165806	19167041	0.547732	5.19046	8.82103	0.00297778	0.10092	ENSG00000100075	5	5	340	273	327	418	127	250	491	507	243	440	+	+	+	+	+	+	+	+	+	+
chr5	53813082	53814369	0.459377	5.95981	8.83237	0.00295933	0.10092	ENSG00000178996	5	5	415	349	359	924	325	971	646	752	464	1006	+	+	+	+	+	+	+	+	+	+
chr6	138820460	138821011	-0.780115	3.39501	8.81254	0.00299167	0.10092	ENSG00000051620	4	4	68	88	107	201	118	96	52	94	68	91	-	+	+	+	+	+	-	+	+	+
chr7	95322829	95323229	-0.850866	3.0964	8.82554	0.00297044	0.10092	ENSG00000158560	3	2	66	122	74	69	118	78	43	78	35	78	-	+	+	-	+	-	-	+	-	+
chr3	151152034	151152345	-1.02921	1.93199	8.81254	0.00299168	0.10092	ENSG00000144893	4	0	28	46	52	62	37	24	27	11	23	23	-	+	+	+	+	-	-	-	-	-
chr8	117742354	117742676	0.757151	3.27189	8.81804	0.00298266	0.10092	ENSG00000147679	2	5	63	46	47	80	72	127	99	124	99	159	-	-	-	+	+	+	+	+	+	+
chr5	58394979	58395433	-0.902577	2.73546	8.83432	0.00295618	0.10092	ENSG00000152932	4	2	50	71	62	125	56	80	41	70	31	33	-	+	+	+	+	+	-	+	-	-
chr5	128255889	128256715	-0.672336	4.58493	8.83945	0.00294789	0.10092	ENSG00000066583	5	5	195	230	236	251	361	157	122	157	185	255	+	+	+	+	+	+	+	+	+	+
chr3	142876857	142877361	-0.914661	2.60774	8.82847	0.00296567	0.10092	ENSG00000175040	4	1	50	66	88	66	77	40	34	24	36	51	-	+	+	+	+	-	-	-	-	+
chr6	128828737	128829389	-0.78669	3.1174	8.8181	0.00298256	0.10092	ENSG00000152894	2	3	77	74	80	177	78	76	102	62	28	53	-	+	-	+	-	+	-	+	-	+
chr2	198668971	198670143	0.525641	5.87714	8.81857	0.0029818	0.10092	ENSG00000247626	5	5	317	411	446	819	257	905	658	683	514	744	+	+	+	+	+	+	+	+	+	+
chr13	32420384	32421325	0.49794	5.84322	8.83458	0.00295575	0.10092	ENSG00000073910	5	5	417	324	368	830	299	649	626	821	493	768	+	+	+	+	+	+	+	+	+	+
chr1	117209421	117210688	0.571043	4.51039	8.8125	0.00299174	0.10092	ENSG00000143061	4	5	170	133	159	314	91	310	267	278	170	329	+	+	+	+	-	+	+	+	+	+
chr14	34197136	34197815	-0.863001	3.71608	8.80463	0.00300467	0.100966	ENSG00000165389	5	4	109	94	118	235	162	141	63	148	106	48	+	+	+	+	+	+	+	+	+	-
chr8	104152791	104153855	0.622393	4.15654	8.80821	0.00299878	0.100966	ENSG00000164929	5	5	108	99	107	223	100	259	201	174	163	300	+	+	+	+	+	+	+	+	+	+
chr9	69007307	69007989	-1.08161	2.82368	8.80468	0.00300459	0.100966	ENSG00000147996	4	4	98	59	102	85	65	56	54	25	11	77	+	-	+	+	+	+	+	+	-	+
chr7	26998444	26998716	-1.32007	1.64304	8.80711	0.00300059	0.100966	ENSG00000005020	3	0	24	44	45	15	54	21	12	24	7	15	-	+	+	-	+	-	-	-	-	-
chr9	68488101	68488312	-1.10892	1.88512	8.8061	0.00300225	0.100966	ENSG00000170161	4	1	59	38	39	37	40	23	26	13	9	35	+	+	+	-	+	-	+	-	-	-
chr2	78040708	78041053	-0.998637	2.00081	8.8081	0.00299895	0.100966	ENSG00000176204	4	1	26	46	47	61	50	28	26	15	25	27	-	+	+	+	+	-	-	-	+	-
chr15	32951618	32952108	-0.780627	3.67457	8.80122	0.00301029	0.10109	ENSG00000166922	5	3	108	98	110	189	141	174	60	162	54	116	+	+	+	+	+	+	-	+	-	+
chr14	37846111	37846570	-0.789515	3.07651	8.78885	0.00303077	0.101151	ENSG00000151338	4	5	51	105	50	144	90	110	64	75	39	62	-	+	+	+	+	+	+	+	+	+
chr3	132372937	132373367	-0.845747	2.88661	8.79017	0.00302858	0.101151	ENSG00000081307	5	3	52	85	53	92	95	75	24	59	83	47	+	+	+	+	+	+	-	+	+	-
chr5	35237808	35238427	-0.633621	4.66163	8.79353	0.00302301	0.101151	ENSG00000113494	5	5	205	121	216	460	333	335	150	219	223	143	+	+	+	+	+	+	+	+	+	+
chr11	23380799	23381295	-0.744424	3.43258	8.79655	0.00301801	0.101151	ENSG00000198168	5	5	101	96	121	161	120	67	70	98	74	65	+	+	+	+	+	+	+	+	+	+
chr8	122050774	122051542	0.645528	4.68797	8.79168	0.00302608	0.101151	ENSG00000172164	5	5	174	104	83	257	176	646	274	266	186	450	+	+	+	+	+	+	+	+	+	+
chr6	99394825	99396312	0.465872	6.81313	8.78895	0.0030306	0.101151	ENSG00000112234	5	5	643	727	682	1465	726	1487	1153	1385	951	1808	+	+	+	+	+	+	+	+	+	+
chr1	249157131	249157933	0.511925	4.97848	8.7873	0.00303335	0.101151	ENSG00000171163	5	5	234	215	201	332	167	452	311	402	250	493	+	+	+	+	+	+	+	+	+	+
chr10	108195654	108196452	-0.64674	4.33125	8.79374	0.00302266	0.101151	ENSG00000148841	5	5	178	183	206	241	228	232	122	193	129	137	+	+	+	+	+	+	+	+	+	+
chr8	16006971	16007257	1.20758	1.61849	8.79445	0.00302148	0.101151	ENSG00000038945	0	3	18	8	23	18	11	50	26	64	23	40	-	-	-	-	-	+	-	+	+	-
chr12	46049001	46049396	0.818968	3.23931	8.79676	0.00301766	0.101151	ENSG00000189079	0	3	60	29	27	74	80	149	67	128	155	128	-	-	-	-	-	+	-	+	+	-
chr2	54682866	54684722	0.505167	5.9914	8.78825	0.00303177	0.101151	ENSG00000115306	5	5	436	552	360	727	305	722	659	857	535	982	+	+	+	+	+	+	+	+	+	+
chr6	136724322	136725183	-0.530651	4.88037	8.78259	0.00304119	0.10128	ENSG00000029363	5	5	262	265	243	429	283	383	191	248	225	240	+	+	+	+	+	+	+	+	+	+
chr4	30877226	30877820	-0.654101	4.03166	8.76562	0.00306961	0.10128	ENSG00000169851	5	5	145	164	98	272	162	175	92	150	98	195	+	+	+	+	+	+	+	+	+	+
chr1	186943708	186944323	-0.811751	3.54651	8.76533	0.0030701	0.10128	ENSG00000116711	5	5	111	108	140	131	132	136	69	79	48	112	+	+	+	+	+	+	+	+	+	+
chr4	17191000	17191258	0.948994	2.15462	8.77393	0.00305566	0.10128	ENSG00000169744	0	4	12	24	23	55	25	48	63	53	45	65	-	-	-	-	-	-	+	+	+	+
chr12	66690001	66690635	-0.936895	2.66381	8.78067	0.00304439	0.10128	ENSG00000155957	3	1	47	60	55	93	104	46	51	26	26	61	-	+	-	+	+	-	-	-	-	+
chr1	216697140	216697538	-0.801468	2.88171	8.7708	0.00306092	0.10128	ENSG00000196482	3	5	64	64	42	134	72	123	36	45	58	61	-	+	-	+	+	+	+	+	+	+
chr9	88713825	88715173	0.514107	5.00855	8.76806	0.00306551	0.10128	ENSG00000135052	5	5	194	149	188	496	181	544	346	416	277	412	+	+	+	+	+	+	+	+	+	+
chr1	167424003	167425571	0.492786	5.2541	8.77035	0.00306166	0.10128	ENSG00000143162	5	5	269	234	240	472	205	602	421	426	298	573	+	+	+	+	+	+	+	+	+	+
chr1	171810110	171811058	0.502851	5.39953	8.77455	0.00305463	0.10128	ENSG00000197959	5	5	291	282	193	537	226	625	459	543	308	708	+	+	+	+	+	+	+	+	+	+
chr9	129676708	129677971	0.525413	6.06625	8.77608	0.00305206	0.10128	ENSG00000136828	5	5	557	491	570	807	258	526	748	1059	473	881	+	+	+	+	+	+	+	+	+	+
chr12	12639625	12640359	-0.654995	3.80774	8.76582	0.00306929	0.10128	ENSG00000111266	5	5	130	116	140	251	133	117	96	93	98	125	+	+	+	+	+	+	+	+	+	+
chr11	6494818	6495700	0.488988	5.64658	8.77486	0.00305411	0.10128	ENSG00000110171	5	5	354	362	295	635	253	608	542	631	401	790	+	+	+	+	+	+	+	+	+	+
chr18	54694213	54695261	0.589451	4.72661	8.77238	0.00305826	0.10128	ENSG00000177511	4	5	111	125	98	242	211	611	140	387	380	323	+	+	-	+	+	+	+	+	+	+
chr8	100718038	100718433	-0.95196	2.35442	8.78179	0.00304253	0.10128	ENSG00000164919	2	2	41	51	49	98	41	54	17	24	42	53	-	+	+	-	-	-	-	-	+	+
chr4	174089185	174091430	0.447156	6.70066	8.78012	0.00304531	0.10128	ENSG00000245213	5	5	773	673	638	1448	507	1489	1240	1211	726	1539	+	+	+	+	+	+	+	+	+	+
chr13	80569232	80569818	-0.820171	2.87998	8.77681	0.00305084	0.10128	ENSG00000136158	5	2	93	72	80	78	87	46	50	39	40	63	+	+	+	+	+	-	-	+	-	+
chr7	87203921	87205153	-0.522699	4.87604	8.76921	0.00306358	0.10128	ENSG00000105784	5	5	239	247	258	485	329	230	247	208	246	221	+	+	+	+	+	+	+	+	+	+
chr10	76677224	76677579	-0.809866	3.03	8.75607	0.00308573	0.101359	ENSG00000156650	5	2	73	91	104	83	100	52	52	68	41	54	+	+	+	+	+	-	+	+	-	-
chr7	100493974	100495118	0.660496	4.19881	8.75843	0.00308175	0.101359	ENSG00000087085	0	5	132	151	127	212	68	144	243	204	137	319	-	-	-	-	-	+	+	+	+	+
chr18	2036155	2036432	-1.03906	2.36649	8.75425	0.00308881	0.101359	ENSG00000101574	3	1	30	29	66	91	86	34	37	43	14	35	-	-	+	+	+	-	-	+	-	-
chr19	42787522	42788680	0.575985	5.74745	8.76031	0.00307856	0.101359	ENSG00000079432	5	5	512	380	399	673	196	319	788	745	379	663	+	+	+	+	+	+	+	+	+	+
chr3	75502245	75503037	0.551061	4.67509	8.75247	0.00309183	0.101359	ENSG00000244026	5	5	129	122	140	303	185	533	247	262	276	326	+	+	+	+	+	+	+	+	+	+
chr13	103109600	103109988	-0.758712	3.53866	8.75349	0.0030901	0.101359	ENSG00000102466	5	5	114	93	124	179	101	170	65	96	55	97	+	+	+	+	+	+	+	+	+	+
chr9	68406618	68406887	-0.946153	2.93906	8.75633	0.0030853	0.101359	ENSG00000170161	5	2	128	51	104	65	85	64	39	45	32	62	+	+	+	+	+	+	-	+	-	-
chr13	22032659	22033860	0.465586	5.86254	8.75379	0.0030896	0.101359	ENSG00000180776	5	5	389	405	390	782	277	751	673	785	396	841	+	+	+	+	+	+	+	+	+	+
chr3	107927156	107928208	-0.646636	4.26273	8.7541	0.00308907	0.101359	ENSG00000114446	5	5	162	204	147	310	198	137	121	209	141	143	+	+	+	+	+	+	+	+	+	+
chr2	241391799	241392566	0.694016	3.65992	8.76274	0.00307446	0.101359	ENSG00000063660	2	5	78	83	103	143	52	130	167	183	90	168	-	-	-	+	+	+	+	+	+	+
chr8	114632675	114633025	-1.06264	2.01629	8.74807	0.00309929	0.10154	ENSG00000104447	3	2	30	52	47	50	50	23	28	26	9	39	-	+	-	+	+	-	-	+	-	+
chr13	98794576	98796247	0.476498	6.33081	8.74138	0.00311069	0.101665	ENSG00000152767	5	5	583	483	503	1259	375	866	967	1133	559	1181	+	+	+	+	+	+	+	+	+	+
chr13	67804109	67805580	0.435615	6.97047	8.74239	0.00310897	0.101665	ENSG00000150361	5	5	938	893	749	1346	710	2093	1210	1438	1052	1843	+	+	+	+	+	+	+	+	+	+
chr14	104313286	104314945	0.516487	5.86102	8.74274	0.00310836	0.101665	ENSG00000088808	5	5	573	368	428	681	230	437	864	947	298	697	+	+	+	+	+	+	+	+	+	+
chr2	163430996	163431738	-0.806974	3.4237	8.74127	0.00311087	0.101665	ENSG00000115271	5	4	82	75	144	210	106	108	77	78	68	44	+	+	+	+	+	+	+	+	+	-
chr11	12009166	12009994	-0.808081	3.33249	8.73891	0.0031149	0.10167	ENSG00000050165	3	3	72	56	56	169	171	131	79	105	35	81	-	+	-	+	+	+	-	+	+	-
chr18	3595337	3596067	-0.560826	5.44089	8.73931	0.00311422	0.10167	ENSG00000177426	5	5	371	380	443	534	487	485	403	378	183	360	+	+	+	+	+	+	+	+	+	+
chr10	47151067	47151694	0.945264	2.55979	8.73645	0.00311912	0.101744	ENSG00000204172	1	4	67	28	38	32	26	64	61	89	70	60	+	-	-	-	-	+	+	+	+	-
chr10	17299641	17300123	-0.829952	2.74154	8.73342	0.00312431	0.10185	ENSG00000026025	4	2	63	63	61	100	69	84	37	38	53	42	-	+	+	+	+	+	-	-	+	-
chr12	107450840	107451249	-1.0013	2.01035	8.73095	0.00312854	0.101861	ENSG00000008405	3	0	32	39	33	62	58	37	29	19	16	35	-	-	+	+	+	-	-	-	-	-
chr11	12411286	12411529	-1.03614	2.00704	8.73158	0.00312745	0.101861	ENSG00000197702	3	1	34	32	45	61	49	40	19	37	15	29	-	-	+	+	+	-	-	+	-	-
chr5	35242967	35243256	-0.843778	3.12904	8.72645	0.00313627	0.101923	ENSG00000113494	4	3	72	75	73	123	111	76	23	71	105	63	+	+	-	+	+	-	-	+	+	+
chr8	131248648	131249457	-0.740192	3.18648	8.72695	0.0031354	0.101923	ENSG00000153317	5	4	91	88	79	134	88	100	47	57	72	80	+	+	+	+	+	+	-	+	+	+
chr8	52782459	52783140	-0.874296	2.96725	8.72667	0.00313589	0.101923	ENSG00000168300	3	2	53	77	140	124	66	58	53	44	37	47	-	+	+	+	-	+	-	-	+	-
chr16	4165262	4166939	0.589369	4.803	8.72408	0.00314034	0.101929	ENSG00000162104	3	5	263	189	218	351	94	156	496	349	155	342	+	+	-	+	-	+	+	+	+	+
chr7	75367943	75369132	0.489652	6.82365	8.7245	0.00313963	0.101929	ENSG00000127946	5	5	774	783	764	1395	641	1077	1213	1775	942	1530	+	+	+	+	+	+	+	+	+	+
chr6	75984750	75985190	-0.890857	3.34066	8.71808	0.0031507	0.102095	ENSG00000112697	5	2	80	107	149	135	100	84	91	52	24	90	+	+	+	+	+	-	-	+	-	+
chr3	144909344	144909743	0.830005	2.58538	8.71548	0.0031552	0.102095	ENSG00000240032	1	4	33	29	27	38	47	91	50	53	118	62	-	-	-	-	+	+	+	-	+	+
chr8	73448667	73450227	0.509875	6.70605	8.71435	0.00315715	0.102095	ENSG00000182674	5	5	554	795	440	1232	693	1376	976	1491	976	1706	+	+	+	+	+	+	+	+	+	+
chr7	45928014	45928832	0.74271	3.44865	8.7153	0.00315551	0.102095	ENSG00000146674	2	5	69	54	54	135	46	204	114	150	114	125	-	+	-	+	-	+	+	+	+	+
chr3	197547616	197548488	-0.559285	5.33974	8.71598	0.00315433	0.102095	ENSG00000186001	5	5	292	378	217	569	490	487	168	477	396	352	+	+	+	+	+	+	+	+	+	+
chr15	33110980	33111499	-1.0788	2.01883	8.71852	0.00314993	0.102095	ENSG00000166923	2	2	28	28	34	79	50	60	17	16	16	49	-	-	-	+	+	+	-	-	-	+
chr13	97947549	97948438	-0.721811	3.41268	8.71221	0.00316087	0.102152	ENSG00000139793	4	4	120	113	80	116	127	90	71	100	55	90	+	+	+	-	+	+	+	+	-	+
chr18	8116226	8117340	-0.600549	4.66561	8.71109	0.00316281	0.102152	ENSG00000206418	5	5	222	235	200	310	337	231	188	211	132	274	+	+	+	+	+	+	+	+	+	+
chr1	239424183	239424480	-1.12873	1.87201	8.7089	0.00316661	0.102211	ENSG00000133019	3	1	21	48	40	42	54	23	11	35	18	26	-	+	+	-	+	-	-	+	-	-
chr11	27453391	27453631	-1.02021	1.82134	8.7074	0.00316921	0.10222	ENSG00000205213	2	2	36	33	26	52	40	42	24	31	11	22	-	-	-	+	+	+	-	+	-	-
chr14	35312073	35312728	-0.942241	2.39704	8.70426	0.00317467	0.10222	ENSG00000198604	3	0	48	48	65	74	66	36	35	22	23	51	-	-	+	+	+	-	-	-	-	-
chr3	140617146	140617584	-0.865937	2.63768	8.70534	0.00317279	0.10222	ENSG00000114120	5	2	58	46	52	94	79	81	33	50	45	32	+	+	+	+	+	+	-	+	-	-
chr10	13389242	13390868	0.471079	5.90254	8.70608	0.00317151	0.10222	ENSG00000086475	5	5	441	366	365	860	311	668	759	769	421	875	+	+	+	+	+	+	+	+	+	+
chr5	176261458	176262121	-0.929769	2.66557	8.70262	0.00317753	0.102249	ENSG00000113763	1	3	49	31	34	134	62	124	22	85	18	67	-	-	-	+	-	+	-	+	-	+
chr11	83875815	83876150	-0.940958	2.07868	8.69791	0.00318576	0.102451	ENSG00000137500	3	0	53	47	41	57	36	34	20	22	25	39	-	+	+	+	-	-	-	-	-	-
chr5	131628968	131630604	0.495352	6.35384	8.69418	0.00319227	0.102584	ENSG00000197208	5	5	492	531	490	1169	373	1375	735	1055	821	1072	+	+	+	+	+	+	+	+	+	+
chr4	40406251	40407058	-0.668141	3.7675	8.69306	0.00319424	0.102584	ENSG00000163694	5	5	120	137	153	211	129	98	129	101	75	82	+	+	+	+	+	+	+	+	+	+
chr2	155480456	155481115	-0.7783	3.24728	8.69218	0.00319578	0.102584	ENSG00000162989	4	4	72	110	76	143	89	128	46	82	69	67	+	+	-	+	+	+	-	+	+	+
chr2	128784602	128786227	0.455266	7.41101	8.69045	0.00319881	0.102618	ENSG00000136715	5	5	1127	1252	1114	2124	905	2094	1716	2392	1421	2396	+	+	+	+	+	+	+	+	+	+
chr1	10753903	10755252	0.570569	5.1205	8.68501	0.00320837	0.102737	ENSG00000130940	5	5	250	258	274	497	112	195	595	509	177	434	+	+	+	+	+	+	+	+	+	+
chr12	95015448	95015947	-0.653708	4.03977	8.68626	0.00320618	0.102737	ENSG00000057704	5	5	133	182	143	242	151	180	83	121	130	162	+	+	+	+	+	+	+	+	+	+
chr6	107435371	107437740	0.497816	6.52612	8.68515	0.00320813	0.102737	ENSG00000178409	5	5	606	631	531	1391	468	960	1183	1070	743	1400	+	+	+	+	+	+	+	+	+	+
chr2	227019381	227019905	-0.747835	3.17512	8.67527	0.00322557	0.103224	ENSG00000169047	5	4	72	68	46	160	108	133	38	63	93	73	+	+	+	+	+	+	-	+	+	+
chr2	181906530	181907018	-1.02976	2.36296	8.67349	0.00322873	0.103262	ENSG00000170035	3	1	48	29	58	88	61	69	35	41	14	31	-	-	+	+	+	+	-	-	-	-
chr9	28197753	28198194	-1.07023	2.6123	8.67061	0.00323382	0.103362	ENSG00000174482	5	2	53	54	62	70	118	22	31	34	26	66	+	+	+	+	+	-	-	+	-	+
chr7	134895766	134896855	0.439065	6.69594	8.66578	0.00324242	0.103444	ENSG00000105875	5	5	684	668	538	1247	690	1619	980	1222	1076	1408	+	+	+	+	+	+	+	+	+	+
chr5	157980614	157981399	0.917717	3.06512	8.66472	0.0032443	0.103444	ENSG00000164330	1	5	32	37	44	69	45	203	78	64	61	199	-	-	-	+	-	+	+	+	+	+
chr3	3168051	3169195	0.455287	6.26537	8.66482	0.00324412	0.103444	ENSG00000072756	5	5	481	491	430	1021	451	1145	793	946	590	1265	+	+	+	+	+	+	+	+	+	+
chr6	53171675	53172078	-0.849077	2.54532	8.66752	0.00323932	0.103444	ENSG00000012660	4	3	66	49	44	93	64	51	41	55	27	42	+	+	-	+	+	+	+	+	-	-
chr15	32968670	32969043	-0.903948	2.39546	8.66246	0.00324832	0.10351	ENSG00000166922	4	0	58	59	53	52	65	37	36	45	19	38	+	+	+	-	+	-	-	-	-	-
chr7	128049579	128050595	0.494765	5.98349	8.65867	0.00325509	0.103662	ENSG00000106348	5	5	388	477	334	770	377	698	675	947	521	950	+	+	+	+	+	+	+	+	+	+
chr8	10657295	10657573	-0.950487	2.2659	8.65644	0.00325907	0.103726	ENSG00000171056	2	2	41	53	62	73	41	38	38	39	12	33	-	+	-	+	-	+	+	-	-	-
chr18	30278287	30279132	-0.840689	3.4255	8.6502	0.00327026	0.103956	ENSG00000141441	4	2	97	95	114	116	161	107	84	61	42	90	+	+	+	+	-	+	-	-	-	+
chr18	52442945	52443913	-0.731772	3.75579	8.65086	0.00326907	0.103956	ENSG00000041353	3	2	84	133	215	290	77	55	184	72	31	97	-	+	+	+	-	-	+	+	-	-
chr4	122617242	122618596	0.45402	6.82572	8.64855	0.00327322	0.103987	ENSG00000164111	5	5	842	760	659	1535	584	1560	1220	1291	998	1650	+	+	+	+	+	+	+	+	+	+
chr2	97481535	97482925	0.463906	6.43049	8.64679	0.00327638	0.104024	ENSG00000168763	5	5	698	584	555	1097	438	817	1089	1232	568	1238	+	+	+	+	+	+	+	+	+	+
chr14	32396397	32397250	-0.543533	4.78364	8.63712	0.00329382	0.104234	ENSG00000100852	5	5	289	199	203	384	299	355	162	235	210	260	+	+	+	+	+	+	+	+	+	+
chr5	18091660	18092182	-0.845478	2.65957	8.63431	0.0032989	0.104234	ENSG00000176788	4	2	71	61	51	109	64	44	54	33	28	59	+	+	-	+	+	-	+	-	-	+
chr13	41363196	41364349	0.460148	5.78373	8.63618	0.00329552	0.104234	ENSG00000102743	5	5	363	322	317	801	298	848	619	711	439	729	+	+	+	+	+	+	+	+	+	+
chr7	34864766	34865118	-0.898004	2.44839	8.63552	0.0032967	0.104234	ENSG00000173852	3	1	51	40	45	93	75	52	52	34	27	25	-	-	+	+	+	-	+	-	-	-
chr6	21045255	21045872	-0.877996	2.61306	8.63595	0.00329593	0.104234	ENSG00000145996	3	1	72	51	91	133	29	16	82	24	15	36	+	-	+	+	-	-	+	-	-	-
chr4	146452276	146452671	0.965086	2.28153	8.63865	0.00329105	0.104234	ENSG00000170365	0	3	27	15	20	40	27	106	66	60	27	79	-	-	-	-	-	+	-	+	-	+
chr9	12748089	12748338	-0.943733	2.38555	8.6406	0.00328753	0.104234	ENSG00000153714	3	3	39	45	63	71	73	45	31	38	22	40	-	-	+	+	+	-	+	+	-	+
chr5	142718358	142718864	-0.855759	2.6513	8.63517	0.00329735	0.104234	ENSG00000113580	4	2	58	69	73	75	68	54	35	44	30	55	+	+	+	+	-	-	-	+	-	+
chr5	95205742	95206138	-0.894832	2.84027	8.62799	0.00331036	0.104344	ENSG00000173221	4	2	64	64	76	163	47	88	52	53	34	32	+	+	+	+	-	+	-	+	-	-
chr13	20437191	20439108	0.441943	7.47433	8.62832	0.00330977	0.104344	ENSG00000132950	5	5	1218	1192	1117	2363	976	2289	1855	2450	1488	2421	+	+	+	+	+	+	+	+	+	+
chr5	141488029	141488892	0.553626	5.14727	8.62985	0.00330698	0.104344	ENSG00000131507	5	5	240	200	224	551	143	454	322	504	311	555	+	+	+	+	+	+	+	+	+	+
chr4	105339448	105339894	-0.709818	3.45965	8.63048	0.00330584	0.104344	ENSG00000168772	4	1	110	83	74	200	120	121	67	66	101	85	+	+	-	+	+	-	-	-	+	-
chr4	9153862	9155476	0.509816	7.61747	8.62498	0.00331585	0.104416	ENSG00000087008	5	5	1595	1379	1364	2532	767	2568	1796	2452	2092	2450	+	+	+	+	+	+	+	+	+	+
chr18	61616381	61616920	0.662506	3.80928	8.62455	0.00331662	0.104416	ENSG00000166401	5	5	94	89	58	123	90	241	165	173	115	207	+	+	+	+	+	+	+	+	+	+
chr12	77693951	77694716	-0.56031	4.77306	8.61953	0.00332578	0.104641	ENSG00000175183	5	5	195	246	223	476	260	335	166	287	185	237	+	+	+	+	+	+	+	+	+	+
chr16	57645154	57645383	-0.900512	2.56222	8.61573	0.00333272	0.104734	ENSG00000205336	3	0	51	45	58	82	75	80	29	45	29	48	-	-	+	+	+	-	-	-	-	-
chr11	3818417	3819377	0.459597	6.99523	8.61599	0.00333225	0.104734	ENSG00000110713	5	5	843	957	861	1533	698	1507	1268	1736	1132	1783	+	+	+	+	+	+	+	+	+	+
chr11	6592147	6592608	1.13205	2.23912	8.59838	0.00336463	0.105333	ENSG00000132275	0	3	52	11	18	23	17	80	33	104	43	63	-	-	-	-	-	+	-	+	+	-
chr12	57610103	57611093	0.640682	4.09623	8.60213	0.00335771	0.105333	ENSG00000182379	4	5	125	105	145	154	93	135	232	266	98	253	+	+	+	-	+	+	+	+	+	+
chr3	24000736	24001158	-0.729135	3.35172	8.59662	0.00336788	0.105333	ENSG00000197885	5	5	100	91	127	192	79	62	84	77	58	61	+	+	+	+	+	+	+	+	+	+
chr17	61522927	61524252	0.516983	5.3264	8.6034	0.00335537	0.105333	ENSG00000008283	5	5	341	303	312	423	184	352	437	591	321	523	+	+	+	+	+	+	+	+	+	+
chr16	66729770	66731340	0.494568	5.75525	8.60148	0.00335889	0.105333	ENSG00000183723	5	5	449	379	399	669	248	441	671	774	383	732	+	+	+	+	+	+	+	+	+	+
chr4	113066271	113067495	0.458466	6.58353	8.60038	0.00336093	0.105333	ENSG00000174749	5	5	625	667	457	1238	568	1336	1012	1294	769	1479	+	+	+	+	+	+	+	+	+	+
chr17	77389474	77389860	-0.998755	2.22447	8.59709	0.003367	0.105333	ENSG00000167281	3	2	84	38	38	61	39	32	36	43	11	34	+	+	-	+	-	+	-	+	-	-
chr9	4582874	4583494	0.7182	3.98546	8.59811	0.00336511	0.105333	ENSG00000205808	4	5	85	68	78	104	144	279	126	271	156	222	+	-	+	+	+	+	+	+	+	+
chr5	81931329	81931930	-0.59546	4.66448	8.59289	0.00337477	0.105486	ENSG00000205464	5	5	117	214	181	622	261	306	229	207	170	160	+	+	+	+	+	+	+	+	+	+
chr11	34226323	34226794	-0.716351	3.67418	8.58319	0.0033928	0.105986	ENSG00000135372	5	5	109	154	151	179	99	79	98	147	42	102	+	+	+	+	+	+	+	+	+	+
chr3	140950017	140951041	0.491166	5.98018	8.57663	0.00340505	0.106305	ENSG00000155893	5	5	392	454	336	843	313	933	600	838	601	898	+	+	+	+	+	+	+	+	+	+
chr3	159577287	159577649	0.925732	2.56827	8.57408	0.00340982	0.106328	ENSG00000151967	0	5	47	26	29	32	31	144	57	58	72	65	-	-	-	-	-	+	+	+	+	+
chr5	10441294	10442496	0.453459	6.10873	8.5744	0.00340922	0.106328	ENSG00000145495	5	5	448	379	353	918	460	1156	743	761	579	1046	+	+	+	+	+	+	+	+	+	+
chr6	55501226	55501695	-0.890398	2.4921	8.57125	0.00341513	0.106366	ENSG00000146151	1	3	39	51	50	85	70	79	28	39	31	46	-	-	-	+	-	+	-	-	+	+
chr13	80102657	80103329	-0.866116	2.65141	8.57202	0.00341369	0.106366	ENSG00000102471	3	2	48	78	31	107	80	57	47	31	45	47	-	+	-	+	+	+	-	-	+	-
chr12	63360080	63361212	-0.509632	5.44434	8.56733	0.00342248	0.106443	ENSG00000111110	5	5	334	385	341	507	595	418	249	444	365	366	+	+	+	+	+	+	+	+	+	+
chr2	172247542	172248095	-0.889014	2.50311	8.5667	0.00342368	0.106443	ENSG00000115827	3	4	40	43	59	110	62	59	31	49	24	49	-	-	+	+	+	+	+	+	-	+
chr5	20570601	20571129	-0.574323	4.80005	8.5688	0.00341973	0.106443	ENSG00000145526	5	5	257	235	269	372	290	383	197	174	207	208	+	+	+	+	+	+	+	+	+	+
chr22	50353662	50354823	0.522649	5.34709	8.56415	0.00342846	0.106446	ENSG00000198355	5	5	348	291	279	518	164	321	568	603	252	538	+	+	+	+	+	+	+	+	+	+
chr20	14859646	14860471	-0.614502	4.14124	8.56496	0.00342695	0.106446	ENSG00000125848	5	5	127	195	112	216	230	184	93	136	185	132	+	+	+	+	+	+	+	+	+	+
chr1	226111495	226112449	0.474717	5.6055	8.56341	0.00342987	0.106446	ENSG00000143811	5	5	328	362	344	576	254	568	524	645	376	716	+	+	+	+	+	+	+	+	+	+
chr14	105330776	105332368	0.494215	5.61889	8.55806	0.00343996	0.106696	ENSG00000099814	5	5	502	403	460	497	149	393	745	652	223	560	+	+	+	+	+	+	+	+	+	+
chr20	4129165	4129943	0.746337	3.75059	8.55099	0.00345334	0.106984	ENSG00000088826	3	5	109	53	122	164	50	199	183	169	106	132	+	-	+	+	-	+	+	+	+	+
chr5	57308600	57310182	-0.511468	5.22509	8.55161	0.00345217	0.106984	ENSG00000145632	5	5	276	263	186	733	318	740	157	279	368	418	+	+	+	+	+	+	+	+	+	+
chr18	51750410	51751525	0.473005	6.60825	8.5473	0.00346035	0.107075	ENSG00000134046	5	5	737	785	535	1139	512	1097	1056	1243	836	1461	+	+	+	+	+	+	+	+	+	+
chr3	168588645	168589076	-0.867745	2.58767	8.54764	0.0034597	0.107075	ENSG00000242268	4	2	75	48	60	101	58	51	48	24	28	52	+	+	+	+	-	-	+	-	+	-
chr9	98046178	98046887	-0.971057	2.28011	8.54606	0.0034627	0.107084	ENSG00000158169	2	2	44	38	40	74	54	62	17	52	19	49	-	-	-	+	+	-	-	+	-	+
chr5	97174014	97174208	-1.06118	1.96638	8.53629	0.00348134	0.10747	ENSG00000058729	3	0	28	49	47	60	43	23	37	14	9	33	-	-	+	+	+	-	-	-	-	-
chr7	5632306	5633080	0.712075	3.73484	8.53768	0.0034787	0.10747	ENSG00000075618	5	5	101	70	120	150	58	119	208	181	113	118	+	+	+	+	+	+	+	+	+	+
chr1	201857486	201858382	0.591019	4.38954	8.53721	0.00347958	0.10747	ENSG00000198892	5	5	138	101	155	237	115	329	214	285	153	322	+	+	+	+	+	+	+	+	+	+
chr11	63535516	63537126	0.576188	4.53129	8.53212	0.00348933	0.107653	ENSG00000188070	2	5	135	153	168	307	121	196	320	319	168	320	-	-	+	+	-	+	+	+	+	+
chr9	69033842	69034131	-1.12873	1.44456	8.52871	0.00349587	0.107792	ENSG00000147996	4	0	39	25	31	24	37	10	15	20	9	19	+	+	+	-	+	-	-	-	-	-
chr7	108082552	108082878	-0.811217	2.83055	8.52222	0.00350837	0.108114	ENSG00000091129	5	4	76	58	85	89	83	64	44	42	44	51	+	+	+	+	+	+	+	+	+	-
chr1	25949177	25949562	-1.00775	2.1059	8.50631	0.00353917	0.108706	ENSG00000117643	2	2	27	49	21	74	49	50	12	55	26	33	-	+	-	+	-	+	-	+	-	-
chr1	116518580	116519924	0.522046	4.90579	8.50692	0.00353798	0.108706	ENSG00000163393	5	5	204	153	166	444	147	508	287	362	288	416	+	+	+	+	+	+	+	+	+	+
chr4	189910585	189910926	-0.744845	3.55394	8.50611	0.00353957	0.108706	ENSG00000249378	3	4	59	87	50	211	200	133	47	114	120	84	-	+	-	+	+	+	+	+	+	-
chr14	100788134	100788607	0.878961	2.93042	8.50586	0.00354004	0.108706	ENSG00000197119	0	5	41	17	42	89	38	162	73	138	60	91	-	-	-	-	-	+	+	+	+	+
chr6	29894295	29895262	1.03285	3.62547	8.50844	0.00353502	0.108706	ENSG00000206503	2	5	137	31	41	171	28	143	103	217	112	236	+	-	-	+	-	+	+	+	+	+
chr3	97536756	97537195	0.770836	4.05713	8.5107	0.00353064	0.108706	ENSG00000113966	1	5	88	62	84	155	136	335	199	110	157	307	-	-	-	-	+	+	+	+	+	+
chr3	50297244	50298083	0.618889	4.57115	8.50084	0.00354983	0.108846	ENSG00000012171	5	5	185	148	196	285	93	237	244	375	208	294	+	+	+	+	+	+	+	+	+	+
chr12	81271739	81272113	-0.931991	2.31361	8.50142	0.0035487	0.108846	ENSG00000111058	5	3	47	65	37	53	69	49	37	21	31	27	+	+	+	+	+	+	-	-	+	+
chr1	27319877	27320840	0.571159	4.78142	8.50033	0.00355083	0.108846	ENSG00000253368	5	5	246	220	269	251	105	178	380	428	171	287	+	+	+	+	+	+	+	+	+	+
chr19	23598388	23598988	0.846391	2.64437	8.49878	0.00355386	0.108875	ENSG00000167232	1	4	50	30	54	68	13	101	51	56	51	123	-	-	-	+	-	+	-	+	+	+
chr20	14430099	14431230	-0.696433	3.51773	8.49655	0.00355821	0.108945	ENSG00000125848	4	2	108	90	98	187	117	148	66	86	87	84	+	-	+	+	+	+	-	-	+	-
chr15	43732961	43733710	-0.782521	3.89748	8.49385	0.00356348	0.109025	ENSG00000067369	5	5	153	98	130	206	201	128	73	152	71	173	+	+	+	+	+	+	+	+	+	+
chr13	27744435	27746548	0.472332	6.51966	8.49308	0.003565	0.109025	ENSG00000152484	5	5	660	658	506	1220	497	915	1182	1293	670	1276	+	+	+	+	+	+	+	+	+	+
chr14	103120606	103120947	-0.98135	2.33426	8.48593	0.00357903	0.109305	ENSG00000089902	3	3	48	35	41	96	50	55	17	65	22	41	+	-	-	+	+	+	-	+	-	+
chr3	75679321	75680349	-0.840827	4.18687	8.48522	0.00358043	0.109305	ENSG00000242516	5	4	280	129	242	159	198	155	118	108	63	173	+	+	+	+	+	+	+	-	+	+
chr3	2139879	2141677	0.462409	6.39323	8.48615	0.0035786	0.109305	ENSG00000144619	5	5	646	595	486	1085	398	1125	811	1040	739	1292	+	+	+	+	+	+	+	+	+	+
chr8	95271280	95271642	-0.574833	4.67813	8.48385	0.00358312	0.109324	ENSG00000164949	5	5	216	266	243	248	348	225	189	185	163	218	+	+	+	+	+	+	+	+	+	+
chr3	187176632	187177129	0.905387	2.5848	8.48229	0.0035862	0.109354	ENSG00000136514	2	3	16	17	29	53	52	110	46	69	127	38	-	-	-	+	+	+	-	+	+	-
chr20	30196129	30196667	0.695468	3.80261	8.46618	0.00361811	0.109698	ENSG00000125968	1	4	115	50	84	134	78	244	128	152	116	264	+	-	-	-	-	+	-	+	+	+
chr12	133263556	133264696	0.541934	5.15122	8.47355	0.00360348	0.109698	ENSG00000176894	5	5	275	258	292	403	143	361	402	577	252	424	+	+	+	+	+	+	+	+	+	+
chr8	145742886	145743624	0.554099	4.87679	8.46498	0.0036205	0.109698	ENSG00000160957	5	5	215	223	238	354	119	227	395	449	197	360	+	+	+	+	+	+	+	+	+	+
chr2	213141202	213141964	0.866454	2.72111	8.47288	0.0036048	0.109698	ENSG00000030419	0	4	24	21	29	43	41	192	33	48	134	69	-	-	-	-	-	+	-	+	+	+
chr7	158823155	158823828	0.694372	3.53955	8.46861	0.00361327	0.109698	ENSG00000126870	4	5	69	45	65	150	64	196	125	166	97	163	-	+	+	+	+	+	+	+	+	+
chr11	100580059	100580397	-1.01698	2.25907	8.47128	0.00360798	0.109698	ENSG00000165895	3	0	55	27	71	66	59	30	23	31	19	43	-	-	+	+	+	-	-	-	-	-
chr13	92050595	92051382	0.533191	5.14353	8.47097	0.0036086	0.109698	ENSG00000215417	5	5	186	280	226	437	184	466	407	441	318	467	+	+	+	+	+	+	+	+	+	+
chr7	150075943	150076796	0.48648	5.94467	8.47175	0.00360705	0.109698	ENSG00000196456	5	5	406	395	397	795	360	661	640	929	533	844	+	+	+	+	+	+	+	+	+	+
chr11	25087059	25087803	-0.491905	5.5274	8.46635	0.00361777	0.109698	ENSG00000169550	5	5	413	417	431	513	622	304	412	316	328	384	+	+	+	+	+	+	+	+	+	+
chr8	97629233	97629775	-0.878105	2.45206	8.46602	0.00361843	0.109698	ENSG00000104324	3	1	50	56	32	98	57	50	23	39	47	49	+	-	-	+	+	-	-	-	+	-
chr7	87426755	87427437	-0.643983	4.2357	8.46595	0.00361856	0.109698	ENSG00000006634	5	5	124	158	156	250	293	172	106	162	138	173	+	+	+	+	+	+	+	+	+	+
chr2	223298109	223299179	-0.715217	3.55334	8.46304	0.00362435	0.109743	ENSG00000163082	4	4	113	90	83	140	166	154	61	91	82	106	-	+	+	+	+	+	-	+	+	+
chr2	119531904	119532661	0.727612	3.70692	8.46108	0.00362827	0.109743	ENSG00000115107	3	5	79	64	76	210	35	221	114	192	110	202	-	+	+	+	-	+	+	+	+	+
chr10	65280518	65282262	0.466659	6.1591	8.46162	0.00362718	0.109743	ENSG00000165476	5	5	513	465	395	1014	382	877	861	843	558	1084	+	+	+	+	+	+	+	+	+	+
chr20	18522375	18522738	-0.934755	2.3551	8.4516	0.00364722	0.109808	ENSG00000232388	3	3	51	58	40	54	74	37	31	36	19	53	-	+	-	+	+	-	-	+	+	+
chr20	29582395	29583188	-0.715159	4.13901	8.4559	0.00363861	0.109808	ENSG00000101294	5	5	232	165	170	173	202	153	145	104	71	170	+	+	+	+	+	+	+	+	+	+
chr5	88578660	88578922	-0.784878	2.96388	8.4529	0.00364461	0.109808	ENSG00000081189	4	3	58	99	71	93	100	49	47	76	49	51	-	+	+	+	+	-	+	+	+	-
chr7	52219120	52219864	-0.768176	4.38063	8.45225	0.00364592	0.109808	ENSG00000106078	5	5	170	249	211	227	293	76	117	181	111	214	+	+	+	+	+	+	+	+	+	+
chr3	27524744	27526361	0.460941	7.28283	8.45685	0.00363672	0.109808	ENSG00000033867	5	5	1024	1170	913	2006	814	1949	1558	2057	1320	2401	+	+	+	+	+	+	+	+	+	+
chr21	23233192	23233664	-0.868425	2.51693	8.45474	0.00364093	0.109808	ENSG00000237484	4	0	69	50	66	70	63	42	40	46	26	35	+	+	+	+	-	-	-	-	-	-
chr8	29082965	29083667	-0.777595	3.23978	8.45472	0.00364097	0.109808	ENSG00000197892	5	4	90	87	82	160	80	113	39	87	77	65	+	+	+	+	+	+	-	+	+	+
chr5	71305095	71305594	-0.79783	3.31487	8.45411	0.0036422	0.109808	ENSG00000131711	5	4	86	136	76	141	86	81	36	91	78	97	+	+	+	+	+	+	-	+	+	+
chr6	44055032	44055388	-1.11352	1.61082	8.44811	0.00365424	0.109957	ENSG00000237686	3	0	41	16	31	51	36	20	26	24	8	15	+	-	-	+	+	-	-	-	-	-
chr14	55820815	55821588	-0.666975	3.9027	8.44332	0.00366386	0.109994	ENSG00000126775	5	5	156	143	106	179	160	165	85	173	66	162	+	+	+	+	+	+	+	+	+	+
chr11	12695385	12696646	0.453814	5.93472	8.44481	0.00366086	0.109994	ENSG00000187079	5	5	490	417	464	781	302	579	784	759	424	851	+	+	+	+	+	+	+	+	+	+
chr5	135040917	135041372	-0.848664	2.72902	8.44494	0.00366061	0.109994	ENSG00000113648	4	3	61	87	71	69	78	29	48	57	22	60	-	+	+	+	+	-	+	+	-	+
chr21	30488064	30488736	-0.927987	2.35339	8.44361	0.00366328	0.109994	ENSG00000156265	2	3	57	32	32	66	54	112	15	31	42	37	+	-	-	-	+	+	-	+	+	-
chr6	11621167	11621892	0.625827	4.08263	8.44095	0.00366865	0.110074	ENSG00000205269	4	5	76	49	59	223	143	424	159	170	193	208	-	+	+	+	+	+	+	+	+	+
chr6	76562373	76562761	-0.758569	2.94803	8.43412	0.00368245	0.110299	ENSG00000196586	5	5	78	72	70	123	75	76	52	52	44	66	+	+	+	+	+	+	+	+	+	+
chr9	86886295	86887051	-0.713263	3.40569	8.43416	0.00368236	0.110299	ENSG00000197506	3	5	82	70	50	236	115	171	56	65	86	102	-	+	-	+	+	+	+	+	+	+
chr14	105444339	105444945	0.706497	3.74207	8.43462	0.00368143	0.110299	ENSG00000185567	1	4	126	60	77	152	57	140	177	213	86	195	-	-	-	-	+	-	+	+	+	+
chr6	115325141	115325885	-0.871786	2.66164	8.43119	0.00368839	0.110414	ENSG00000196591	3	3	39	62	60	114	64	90	32	33	48	45	-	+	-	+	+	+	-	+	+	-
chr12	86648075	86648711	-0.750858	3.84826	8.42812	0.00369463	0.110474	ENSG00000182050	5	4	150	120	130	212	167	164	102	43	104	134	+	+	+	+	+	+	+	-	+	+
chr10	38913064	38913322	-1.2701	1.76894	8.42893	0.00369297	0.110474	ENSG00000099251	3	0	26	74	41	14	55	11	29	5	6	17	-	+	+	-	+	-	-	-	-	-
chr15	48049146	48049407	-0.841025	2.83074	8.42609	0.00369875	0.110479	ENSG00000188467	4	3	66	62	76	105	67	91	35	65	32	59	-	+	+	+	+	+	-	+	-	+
chr4	146600660	146601665	-0.499382	5.27947	8.42596	0.00369901	0.110479	ENSG00000151611	5	5	315	328	377	636	368	442	345	293	247	298	+	+	+	+	+	+	+	+	+	+
chr11	6651177	6652291	0.648851	4.09557	8.42354	0.00370394	0.110526	ENSG00000166340	4	5	113	84	62	250	68	373	155	178	184	252	+	+	-	+	+	+	+	+	+	+
chr1	143438105	143438347	-1.19137	2.02334	8.42311	0.00370481	0.110526	ENSG00000196369	3	0	66	37	71	32	38	29	30	13	7	23	-	+	+	-	+	-	-	-	-	-
chr16	67737643	67738286	-0.888116	2.43744	8.41547	0.00372043	0.110788	ENSG00000141098	0	3	49	60	37	80	46	88	21	47	35	39	-	-	-	-	-	+	-	+	+	-
chr4	27763301	27763837	0.998768	2.08632	8.41467	0.00372205	0.110788	ENSG00000109689	0	3	21	7	13	34	18	128	17	33	81	56	-	-	-	-	-	+	-	-	+	+
chr4	32860197	32860971	-0.550757	4.60079	8.41467	0.00372205	0.110788	ENSG00000169851	5	5	232	301	263	259	218	171	186	222	135	187	+	+	+	+	+	+	+	+	+	+
chr1	142618719	142619389	-0.875477	3.45749	8.41502	0.00372133	0.110788	ENSG00000196369	3	3	160	92	63	244	80	95	110	48	32	117	+	+	-	+	-	+	+	-	-	+
chr5	76482552	76483232	-0.834499	3.3104	8.40846	0.00373478	0.111104	ENSG00000113231	4	3	65	73	97	180	114	157	83	77	32	65	-	+	+	+	+	+	+	+	-	-
chr9	139293894	139294943	0.580904	4.55042	8.40511	0.00374167	0.11112	ENSG00000165684	5	5	187	179	170	190	137	189	244	360	189	346	+	+	+	+	+	+	+	+	+	+
chr1	55909229	55909542	1.04046	1.82186	8.40603	0.00373978	0.11112	ENSG00000162402	1	3	24	15	46	35	6	29	55	41	15	52	-	-	+	-	-	-	+	+	-	+
chr4	148652749	148654226	0.451864	6.15461	8.40575	0.00374037	0.11112	ENSG00000071205	5	5	436	418	456	1032	385	1159	740	746	563	1152	+	+	+	+	+	+	+	+	+	+
chr13	43294465	43294944	-0.715771	3.49752	8.40127	0.00374959	0.111292	ENSG00000120659	5	5	103	140	125	168	87	94	86	71	61	90	+	+	+	+	+	+	+	+	+	+
chr18	54070223	54070910	-0.77025	3.31035	8.39844	0.00375544	0.111402	ENSG00000091157	3	3	56	68	108	204	116	116	56	67	59	88	-	-	+	+	+	+	-	+	-	+
chr6	91521212	91521984	0.510488	5.48787	8.39626	0.00375995	0.111473	ENSG00000135341	5	5	248	199	128	571	364	1010	399	409	607	546	+	+	+	+	+	+	+	+	+	+
chr3	123751493	123752916	0.507416	5.3465	8.3921	0.00376854	0.111664	ENSG00000160145	5	5	283	298	271	541	169	524	420	494	339	622	+	+	+	+	+	+	+	+	+	+
chr7	81834016	81834361	-0.751361	3.36654	8.38745	0.00377821	0.111887	ENSG00000153956	5	5	83	106	114	123	132	81	64	71	57	96	+	+	+	+	+	+	+	+	+	+
chr19	33165799	33166941	0.487949	5.68112	8.38193	0.00378969	0.112101	ENSG00000105186	5	5	432	373	483	621	184	498	574	707	342	671	+	+	+	+	+	+	+	+	+	+
chr18	892322	892700	-0.846295	2.65164	8.38217	0.00378919	0.112101	ENSG00000141433	3	4	51	35	41	102	117	52	43	47	41	42	-	-	+	+	+	+	+	-	+	+
chr8	131341983	131342574	-0.720984	3.72944	8.3791	0.00379561	0.11212	ENSG00000153317	5	4	95	123	84	242	155	199	108	70	96	83	+	+	+	+	+	+	+	-	+	+
chr20	57925854	57926764	-0.777585	3.26291	8.37736	0.00379923	0.11212	ENSG00000124205	5	3	91	90	76	114	96	150	28	90	79	79	+	+	+	+	+	+	-	+	+	-
chr10	52154968	52155376	-0.838436	2.47398	8.38055	0.00379257	0.11212	ENSG00000188611	2	2	49	53	54	92	58	44	50	45	20	38	-	+	-	+	-	-	+	+	-	-
chr1	247274460	247275845	0.528475	4.9777	8.37649	0.00380105	0.11212	ENSG00000188295	5	5	227	218	178	345	173	422	313	350	257	581	+	+	+	+	+	+	+	+	+	+
chr6	145527571	145528015	-0.80844	2.84491	8.37785	0.00379822	0.11212	ENSG00000112425	2	2	54	48	71	144	73	102	39	44	40	65	-	-	+	+	-	+	-	-	+	-
chr1	109791909	109793034	0.668009	3.85663	8.37016	0.00381432	0.112385	ENSG00000143126	2	5	104	98	57	155	73	178	241	199	82	204	-	-	-	+	+	+	+	+	+	+
chr6	84578456	84578714	-1.03507	2.78137	8.37057	0.00381346	0.112385	ENSG00000065615	4	3	55	47	73	101	102	69	71	45	10	54	-	+	+	+	+	+	+	+	-	-
chr11	28504382	28505044	0.82548	2.61449	8.36659	0.00382181	0.112487	ENSG00000169519	0	4	39	31	22	61	40	68	84	79	69	76	-	-	-	-	-	-	+	+	+	+
chr8	59764757	59765218	-0.739701	3.39619	8.36646	0.00382208	0.112487	ENSG00000035681	5	5	83	79	67	180	140	127	60	81	58	122	+	+	+	+	+	+	+	+	+	+
chr5	28864100	28864541	0.881478	2.5304	8.36499	0.00382519	0.112508	ENSG00000113361	0	5	24	15	16	59	45	136	65	66	45	94	-	-	-	-	-	+	+	+	+	+
chr9	36136168	36137243	0.535529	4.62633	8.36409	0.00382708	0.112508	ENSG00000122694	5	5	172	135	147	319	125	389	253	329	190	374	+	+	+	+	+	+	+	+	+	+
chr19	10981560	10982651	0.534841	5.68616	8.36112	0.00383335	0.112629	ENSG00000142453	5	5	443	393	380	651	193	378	722	754	365	587	+	+	+	+	+	+	+	+	+	+
chr1	193084821	193085234	-0.718793	3.34732	8.35808	0.00383977	0.112754	ENSG00000134371	5	4	111	96	130	135	94	71	87	72	50	64	+	+	+	+	+	+	+	+	+	-
chr3	75483848	75485370	0.436231	8.30075	8.35704	0.00384196	0.112756	ENSG00000244026	5	5	2635	2403	2267	3290	1660	3667	2837	3975	3170	4114	+	+	+	+	+	+	+	+	+	+
chr1	109940074	109941067	0.490888	5.29876	8.35508	0.00384612	0.112814	ENSG00000134243	5	5	312	264	254	446	205	402	487	562	225	641	+	+	+	+	+	+	+	+	+	+
chr12	121904639	121905703	0.497156	5.39864	8.34345	0.00387081	0.113245	ENSG00000170633	5	5	336	242	326	545	201	387	595	670	241	504	+	+	+	+	+	+	+	+	+	+
chr3	21477272	21477783	-0.730439	3.30902	8.34307	0.00387161	0.113245	ENSG00000151789	4	5	68	92	109	178	107	79	85	62	48	84	-	+	+	+	+	+	+	+	+	+
chr19	33667383	33668722	0.490585	6.3715	8.34567	0.00386607	0.113245	ENSG00000130881	5	5	635	687	747	929	334	697	910	1227	600	1057	+	+	+	+	+	+	+	+	+	+
chr7	124405384	124406373	0.475741	5.8315	8.34414	0.00386934	0.113245	ENSG00000170775	5	5	424	330	319	744	313	966	563	480	632	810	+	+	+	+	+	+	+	+	+	+
chr2	64833579	64833933	-0.86174	2.48354	8.34412	0.00386937	0.113245	ENSG00000119844	4	1	59	63	79	94	34	20	69	27	16	32	-	+	+	+	+	-	+	-	-	-
chr7	120373270	120373662	-0.775684	2.79111	8.34187	0.00387417	0.113257	ENSG00000106025	3	1	68	86	57	85	73	56	47	61	37	50	-	+	-	+	+	-	-	+	-	-
chr7	102631977	102632573	-0.727255	3.72054	8.3385	0.00388135	0.113404	ENSG00000128606	5	5	132	108	137	162	142	149	57	126	78	126	+	+	+	+	+	+	+	+	+	+
chr3	86925749	86926205	0.923537	2.91237	8.33496	0.00388893	0.113562	ENSG00000206538	0	5	40	50	44	29	56	149	95	77	54	116	-	-	-	-	-	+	+	+	+	+
chr12	103159494	103159849	0.955969	2.06222	8.33257	0.00389405	0.113648	ENSG00000139352	0	4	17	24	31	28	24	67	48	34	58	48	-	-	-	-	-	+	+	-	+	+
chr2	73290949	73291470	-0.814938	2.88945	8.33072	0.00389802	0.1137	ENSG00000144040	4	3	84	48	55	129	71	99	49	71	24	71	+	-	+	+	+	+	+	+	-	-
chr8	134663959	134664414	-0.812528	2.76746	8.32919	0.0039013	0.113733	ENSG00000008513	4	1	63	78	94	95	60	37	72	36	31	32	+	+	+	+	-	-	+	-	-	-
chr2	103352299	103353805	0.46896	5.48378	8.32539	0.00390948	0.113846	ENSG00000135953	5	5	336	266	285	553	248	674	455	455	377	730	+	+	+	+	+	+	+	+	+	+
chr21	25395822	25396671	-0.589617	4.28521	8.32537	0.00390952	0.113846	ENSG00000237484	5	5	189	202	159	261	176	256	125	152	134	163	+	+	+	+	+	+	+	+	+	+
chr3	112083674	112084267	-0.78038	3.13571	8.32371	0.0039131	0.113886	ENSG00000091972	4	4	85	51	36	203	99	134	55	49	69	68	+	+	-	+	+	+	-	+	+	+
chr13	55665327	55665798	0.813763	2.94494	8.32032	0.00392039	0.114035	ENSG00000102837	1	5	36	23	33	70	61	193	79	54	112	81	-	-	-	-	+	+	+	+	+	+
chr15	85616699	85617250	-0.665375	3.82788	8.31616	0.00392939	0.114234	ENSG00000073417	5	4	128	139	116	204	146	138	73	150	90	135	+	+	+	+	+	+	-	+	+	+
chr5	92956200	92957506	0.434766	6.59499	8.31477	0.00393239	0.114237	ENSG00000237187	5	5	673	636	605	1115	584	1572	1046	1075	737	1435	+	+	+	+	+	+	+	+	+	+
chr10	11652993	11654189	0.470341	5.84618	8.31326	0.00393568	0.114237	ENSG00000148429	5	5	380	338	309	876	307	818	607	742	525	778	+	+	+	+	+	+	+	+	+	+
chr10	111682730	111683674	0.47171	5.47812	8.31221	0.00393793	0.114237	ENSG00000108039	5	5	335	282	265	554	254	566	461	555	397	653	+	+	+	+	+	+	+	+	+	+
chr6	131772575	131773181	-0.761974	3.77649	8.31207	0.00393825	0.114237	ENSG00000112282	5	5	136	100	132	252	133	145	141	128	57	56	+	+	+	+	+	+	+	+	+	+
chr14	78432205	78432776	0.596813	4.21335	8.30784	0.00394744	0.114377	ENSG00000063761	5	5	138	85	87	247	86	367	159	193	202	278	+	+	+	+	+	+	+	+	+	+
chr13	94833869	94834634	-0.689147	4.13317	8.30854	0.00394591	0.114377	ENSG00000088451	5	5	147	92	113	386	200	230	87	182	157	104	+	+	+	+	+	+	+	+	+	+
chr10	82167518	82169011	0.460415	5.76381	8.30574	0.00395201	0.114447	ENSG00000122378	5	5	360	366	359	668	282	859	508	678	492	744	+	+	+	+	+	+	+	+	+	+
chr13	26553524	26553875	-0.863644	2.69881	8.29902	0.00396664	0.114617	ENSG00000180730	5	2	60	49	63	95	93	42	58	47	21	57	+	+	+	+	+	-	-	+	-	+
chr2	129038070	129038916	0.623834	4.6845	8.29988	0.00396478	0.114617	ENSG00000136720	4	5	157	90	105	275	181	485	165	438	262	416	+	-	+	+	+	+	+	+	+	+
chr21	29753467	29754270	-0.879309	2.80736	8.29904	0.00396661	0.114617	ENSG00000156239	4	3	69	55	90	124	58	51	28	41	32	97	-	+	+	+	+	+	-	-	+	+
chr3	81519416	81520249	-0.528451	4.83962	8.30058	0.00396323	0.114617	ENSG00000114480	5	5	222	274	230	370	364	266	221	241	181	272	+	+	+	+	+	+	+	+	+	+
chr5	90568723	90569249	-0.935762	2.54776	8.29767	0.00396961	0.114639	ENSG00000248323	4	2	74	30	58	140	45	72	46	30	27	26	+	-	+	+	+	+	+	-	-	-
chr13	44833169	44833477	-0.910403	2.23844	8.29386	0.00397792	0.114692	ENSG00000151778	3	0	55	47	46	87	34	36	25	34	32	29	-	+	+	+	-	-	-	-	-	-
chr2	175112697	175113760	0.434684	6.61206	8.29491	0.00397564	0.114692	ENSG00000138430	5	5	662	627	654	1140	610	1369	908	1318	889	1328	+	+	+	+	+	+	+	+	+	+
chr14	89258207	89259784	0.452503	6.31672	8.29384	0.00397798	0.114692	ENSG00000165521	5	5	556	449	461	1051	489	1055	835	1057	572	1339	+	+	+	+	+	+	+	+	+	+
chr19	19729320	19729889	0.605735	4.14109	8.28891	0.0039888	0.11494	ENSG00000064547	5	5	154	126	176	174	69	123	221	223	123	247	+	+	+	+	+	+	+	+	+	+
chr3	181031028	181031511	0.736795	3.12135	8.28637	0.00399438	0.115038	ENSG00000205981	2	5	38	32	40	97	69	169	104	103	84	107	-	-	-	+	+	+	+	+	+	+
chr18	8217860	8218424	-1.07272	2.59454	8.28096	0.0040063	0.115254	ENSG00000206418	2	3	38	47	34	114	94	60	16	35	33	96	-	-	-	+	+	+	-	-	+	+
chr12	8184915	8186470	0.453607	6.25306	8.2811	0.00400599	0.115254	ENSG00000065970	5	5	522	509	412	986	424	1061	720	1075	676	1101	+	+	+	+	+	+	+	+	+	+
chr10	133794934	133796074	0.547695	5.39802	8.27668	0.00401576	0.115463	ENSG00000176171	5	5	335	312	252	513	162	505	443	723	333	505	+	+	+	+	+	+	+	+	+	+
chr2	134022895	134024559	-0.610055	4.63173	8.27206	0.00402598	0.115658	ENSG00000176771	5	5	214	307	195	463	144	255	196	273	118	186	+	+	+	+	+	+	+	+	+	+
chr1	109102249	109103258	0.515808	5.04164	8.27062	0.00402918	0.115658	ENSG00000162636	5	5	301	209	229	440	121	364	377	433	225	489	+	+	+	+	+	+	+	+	+	+
chr3	109646041	109646380	-0.890751	2.46823	8.26863	0.00403359	0.115658	ENSG00000177707	2	3	40	59	41	127	47	56	35	25	34	52	-	-	-	+	+	+	+	-	-	+
chr6	158243757	158245392	0.504336	5.29511	8.2693	0.0040321	0.115658	ENSG00000130340	5	5	262	213	261	558	228	391	476	568	283	575	+	+	+	+	+	+	+	+	+	+
chr7	6676522	6677749	0.561166	4.47965	8.27004	0.00403045	0.115658	ENSG00000205903	3	5	162	147	140	237	130	220	331	291	132	335	-	+	-	+	+	+	+	+	+	+
chr4	103701546	103702042	-0.489165	5.32724	8.26545	0.00404067	0.115671	ENSG00000109323	5	5	368	336	275	579	482	353	318	387	292	343	+	+	+	+	+	+	+	+	+	+
chr2	165563021	165563310	-0.879165	2.99516	8.26655	0.00403822	0.115671	ENSG00000115290	4	2	103	46	81	101	117	60	75	47	38	42	+	-	+	+	+	-	+	+	-	-
chr5	179779619	179780825	0.655834	4.48807	8.2662	0.00403899	0.115671	ENSG00000131459	4	5	208	141	277	235	61	178	427	221	124	182	+	+	+	+	-	+	+	+	+	+
chr10	135474008	135474394	-0.947313	2.68062	8.25841	0.00405636	0.115994	ENSG00000203772	5	3	118	58	66	56	56	67	39	32	18	60	+	+	+	+	+	+	-	-	+	+
chr2	102971993	102972927	0.549681	4.68987	8.25855	0.00405606	0.115994	ENSG00000115602	5	5	178	166	116	317	136	431	265	308	266	341	+	+	+	+	+	+	+	+	+	+
chr1	220676500	220676946	-0.78805	2.7756	8.25732	0.00405879	0.115999	ENSG00000116141	3	3	58	67	46	88	87	91	37	62	39	55	-	+	-	+	+	+	-	+	-	+
chr11	46494060	46494770	-0.794544	2.73961	8.25635	0.00406097	0.115999	ENSG00000180720	3	1	57	63	74	109	69	56	58	45	33	40	-	-	+	+	+	-	+	-	-	-
chr9	131450942	131452263	0.495569	5.71135	8.25392	0.0040664	0.116091	ENSG00000119335	5	5	477	370	430	618	196	430	661	858	297	647	+	+	+	+	+	+	+	+	+	+
chr14	30683632	30684086	-0.956523	2.26441	8.25129	0.0040723	0.116196	ENSG00000184304	3	1	45	50	39	75	47	62	33	26	13	51	-	+	+	+	-	+	-	-	-	-
chr21	16452860	16453299	1.1107	2.3426	8.24917	0.00407707	0.116269	ENSG00000180530	0	3	15	21	8	21	43	179	41	22	63	82	-	-	-	-	-	+	-	-	+	+
chr9	29176290	29177242	-0.719733	3.35803	8.24509	0.00408624	0.116467	ENSG00000174482	5	4	77	71	79	184	132	115	56	91	66	95	+	+	+	+	+	+	-	+	+	+
chr4	40858796	40859472	0.61819	4.04932	8.24403	0.00408862	0.116471	ENSG00000179299	5	5	129	92	95	224	72	220	200	179	142	252	+	+	+	+	+	+	+	+	+	+
chr7	191938	193297	0.560137	4.93784	8.24229	0.00409255	0.11652	ENSG00000177706	5	5	260	180	188	393	135	349	327	481	263	386	+	+	+	+	+	+	+	+	+	+
chr17	78233948	78234347	0.670706	3.98817	8.24036	0.00409689	0.11658	ENSG00000173821	5	4	106	96	126	193	72	87	243	263	97	210	+	+	+	+	+	-	+	+	+	+
chr12	13196962	13197931	0.517901	4.79242	8.23721	0.00410401	0.116655	ENSG00000084444	5	5	170	149	154	392	156	483	303	294	255	382	+	+	+	+	+	+	+	+	+	+
chr6	21885630	21886195	0.710303	3.62559	8.23768	0.00410296	0.116655	ENSG00000124766	3	5	60	36	49	130	94	321	108	157	147	124	-	-	+	+	+	+	+	+	+	+
chr11	1017264	1017988	-0.837829	3.18604	8.23624	0.00410621	0.116655	ENSG00000184956	4	1	165	54	85	148	64	67	56	93	34	71	+	-	+	+	+	-	-	+	-	-
chr20	29607627	29608055	-0.843507	3.42362	8.23234	0.00411505	0.116787	ENSG00000101294	4	1	146	94	132	114	103	96	87	60	27	106	+	-	+	+	+	-	+	-	-	-
chr8	8775084	8775638	-0.700494	3.36214	8.23223	0.0041153	0.116787	ENSG00000147324	5	5	95	91	97	152	119	79	80	89	52	85	+	+	+	+	+	+	+	+	+	+
chr2	50763407	50764036	-0.756746	2.99725	8.23056	0.00411908	0.116831	ENSG00000179915	4	4	70	67	58	150	72	108	36	55	69	67	+	+	-	+	+	+	-	+	+	+
chr8	59136751	59137278	-0.667286	3.89798	8.22905	0.00412251	0.116865	ENSG00000215114	5	5	111	125	121	237	165	193	70	152	114	118	+	+	+	+	+	+	+	+	+	+
chr21	9716469	9716765	-1.23103	1.58237	8.22689	0.00412741	0.116877	ENSG00000188681	4	0	44	27	46	23	38	22	19	4	9	20	+	+	+	-	+	-	-	-	-	-
chr1	99126713	99128073	0.453965	6.41417	8.22713	0.00412687	0.116877	ENSG00000162627	5	5	560	570	530	1174	429	1247	788	991	821	1270	+	+	+	+	+	+	+	+	+	+
chr9	108441625	108442106	0.979089	2.22617	8.21819	0.00414724	0.117343	ENSG00000095209	0	5	31	8	34	53	23	68	49	47	79	38	-	-	-	-	-	+	+	+	+	+
chr2	62422745	62423949	0.50641	5.00314	8.21772	0.00414833	0.117343	ENSG00000170340	5	5	243	204	222	412	149	407	336	417	272	442	+	+	+	+	+	+	+	+	+	+
chr15	77223802	77224487	0.481102	5.69008	8.21488	0.00415482	0.117399	ENSG00000117906	5	5	398	306	425	652	276	471	572	719	404	714	+	+	+	+	+	+	+	+	+	+
chr7	111834165	111834621	0.894935	2.42145	8.2151	0.00415432	0.117399	ENSG00000128512	2	4	14	16	14	48	50	96	48	40	138	26	-	-	-	+	+	+	+	+	+	-
chr7	75574735	75575745	-0.683218	4.01415	8.21137	0.00416287	0.117502	ENSG00000127948	5	4	135	150	145	266	144	196	104	202	82	101	+	+	+	+	+	+	-	+	+	+
chr2	223846839	223847271	-0.762524	3.21305	8.20908	0.00416813	0.117502	ENSG00000152049	4	3	70	75	70	179	80	150	37	94	58	81	-	+	+	+	+	+	-	+	+	-
chr3	20098721	20099222	-0.580994	4.31322	8.2096	0.00416694	0.117502	ENSG00000114166	5	5	177	171	191	293	204	229	148	137	130	169	+	+	+	+	+	+	+	+	+	+
chr2	237568289	237568737	0.736034	3.08077	8.20841	0.00416967	0.117502	ENSG00000144476	3	5	68	60	45	59	50	101	87	85	97	132	+	+	-	-	+	+	+	+	+	+
chr1	40282343	40282822	-0.736015	3.42608	8.21121	0.00416325	0.117502	ENSG00000116985	5	4	85	147	93	100	134	83	56	117	57	88	+	+	+	+	+	+	-	+	+	+
chr4	86190200	86190510	-0.810562	3.03081	8.20536	0.00417669	0.117574	ENSG00000138639	4	3	57	83	93	92	127	37	37	59	75	54	-	+	+	+	+	-	-	+	+	+
chr5	128300676	128301675	0.653331	5.14615	8.20609	0.004175	0.117574	ENSG00000066583	5	5	334	216	187	235	239	478	511	364	214	600	+	+	+	+	+	+	+	+	+	+
chr14	92324756	92325192	-0.732303	3.47403	8.20172	0.00418506	0.117746	ENSG00000165929	5	5	99	99	119	163	122	95	71	74	54	125	+	+	+	+	+	+	+	+	+	+
chr1	90972838	90973215	0.952389	2.20528	8.19805	0.00419355	0.117835	ENSG00000233593	1	3	23	27	11	36	25	66	43	43	103	41	-	+	-	-	-	+	-	+	+	-
chr7	149156878	149158222	0.501997	5.05931	8.19881	0.0041918	0.117835	ENSG00000196453	5	5	203	185	192	467	210	418	374	462	285	459	+	+	+	+	+	+	+	+	+	+
chr5	96054325	96054627	-0.899697	2.77717	8.19744	0.00419496	0.117835	ENSG00000164307	3	2	67	70	89	132	38	60	69	56	17	29	+	+	-	+	-	-	+	+	-	-
chr10	126106753	126107905	0.534465	5.75747	8.19436	0.00420209	0.117971	ENSG00000065154	5	5	329	393	432	700	236	673	564	715	558	590	+	+	+	+	+	+	+	+	+	+
chr1	77531405	77531903	0.615936	3.98511	8.19206	0.00420742	0.117995	ENSG00000142892	5	5	100	84	75	151	96	346	131	164	168	244	+	+	+	+	+	+	+	+	+	+
chr13	76867421	76868092	-0.704876	3.64163	8.19252	0.00420634	0.117995	ENSG00000178695	5	5	104	82	71	242	140	201	92	138	63	76	+	+	+	+	+	+	+	+	+	+
chr6	149665131	149665555	-0.847052	2.35562	8.18903	0.00421444	0.118128	ENSG00000055208	2	2	41	40	40	89	67	52	28	27	41	41	-	-	-	+	+	+	-	-	+	-
chr14	65482115	65482392	0.856621	2.57429	8.18687	0.00421947	0.118206	ENSG00000257365	0	4	18	15	19	68	49	124	56	100	50	83	-	-	-	-	-	+	-	+	+	+
chr14	65973433	65974199	-0.69387	4.50042	8.18045	0.00423442	0.118372	ENSG00000033170	5	5	156	229	184	277	267	285	111	251	90	291	+	+	+	+	+	+	+	+	+	+
chr7	41735719	41736404	-0.522866	4.9884	8.18323	0.00422794	0.118372	ENSG00000122641	5	5	257	256	196	464	379	408	174	290	232	372	+	+	+	+	+	+	+	+	+	+
chr10	14919968	14921320	0.444619	6.51513	8.1819	0.00423104	0.118372	ENSG00000152455	5	5	697	576	585	1187	490	1174	892	1240	819	1242	+	+	+	+	+	+	+	+	+	+
chr1	98386105	98387124	0.435779	6.05193	8.18116	0.00423276	0.118372	ENSG00000188641	5	5	510	424	480	843	351	883	748	698	519	979	+	+	+	+	+	+	+	+	+	+
chr1	85462437	85464151	0.530032	4.66756	8.17325	0.00425126	0.118779	ENSG00000055732	5	5	185	143	159	324	136	354	288	332	217	328	+	+	+	+	+	+	+	+	+	+
chr11	84633941	84634655	-0.852899	2.5063	8.169	0.00426123	0.118871	ENSG00000150672	3	1	67	53	35	92	49	58	28	70	26	47	+	+	-	+	-	-	-	+	-	-
chr9	18393219	18394116	-0.606437	4.95978	8.16894	0.00426137	0.118871	ENSG00000178031	5	5	274	302	348	354	362	249	261	210	130	340	+	+	+	+	+	+	+	+	+	+
chr6	139860843	139861424	-0.762915	3.52565	8.17015	0.00425854	0.118871	ENSG00000164442	5	4	99	79	131	227	90	171	54	98	72	78	+	+	+	+	+	+	-	+	+	+
chr4	139156582	139157519	-0.780752	3.20607	8.1666	0.00426688	0.118962	ENSG00000151012	5	5	85	71	120	135	101	77	62	58	39	93	+	+	+	+	+	+	+	+	+	+
chr21	28451960	28452501	-0.75549	3.63948	8.16551	0.00426945	0.11897	ENSG00000154736	5	5	142	163	113	78	186	76	86	62	66	106	+	+	+	+	+	+	+	+	+	+
chr10	92617135	92618133	0.585573	4.42308	8.16401	0.00427297	0.119005	ENSG00000148688	4	5	146	125	103	303	114	251	268	281	191	300	+	+	-	+	+	+	+	+	+	+
chr5	115890526	115890876	0.931994	2.49897	8.16111	0.00427982	0.119132	ENSG00000092421	1	4	24	16	30	64	31	144	76	35	45	86	-	-	-	+	-	+	+	-	+	+
chr8	99837426	99838549	0.430903	6.52559	8.15618	0.00429147	0.119222	ENSG00000104375	5	5	591	637	697	1080	612	991	1027	1137	818	1195	+	+	+	+	+	+	+	+	+	+
chr4	69961768	69962390	-0.715334	3.44415	8.15369	0.00429736	0.119222	ENSG00000171234	4	5	67	72	93	170	176	124	72	86	87	56	-	+	+	+	+	+	+	+	+	+
chr13	110228572	110229109	-0.908472	3.88063	8.15683	0.00428994	0.119222	ENSG00000185950	5	4	146	124	123	265	130	209	55	172	115	56	+	+	+	+	+	+	+	+	+	-
chr21	32671220	32672061	-0.65748	3.92185	8.15301	0.00429898	0.119222	ENSG00000156299	5	5	114	102	101	221	209	232	72	152	122	111	+	+	+	+	+	+	+	+	+	+
chr2	191272521	191273846	0.491859	6.18827	8.15387	0.00429694	0.119222	ENSG00000151690	5	5	471	417	321	1233	363	1012	770	930	601	1200	+	+	+	+	+	+	+	+	+	+
chr3	156319375	156319686	-0.959644	2.4301	8.15729	0.00428884	0.119222	ENSG00000114850	4	0	50	42	62	95	48	54	20	23	24	80	+	-	+	+	+	-	-	-	-	-
chr17	61352705	61353079	-0.861238	2.70745	8.15381	0.00429708	0.119222	ENSG00000008283	3	3	67	41	49	111	91	42	52	66	24	55	+	-	-	+	+	-	+	+	-	+
chr14	92451689	92452247	-0.90739	2.54483	8.14743	0.00431222	0.11932	ENSG00000140092	3	1	68	45	55	73	72	78	38	27	28	45	+	-	-	+	+	+	-	-	-	-
chr11	22806715	22807123	-0.737408	3.27897	8.14798	0.00431092	0.11932	ENSG00000198168	5	2	114	87	78	143	100	89	74	85	61	54	+	+	+	+	+	+	-	+	-	-
chr8	82023655	82024593	0.46391	6.00873	8.14892	0.00430868	0.11932	ENSG00000076641	5	5	409	385	355	997	321	1036	626	743	634	890	+	+	+	+	+	+	+	+	+	+
chr8	95906978	95909033	0.433297	6.87384	8.14672	0.0043139	0.11932	ENSG00000156170	5	5	782	824	748	1475	698	1422	1242	1482	973	1736	+	+	+	+	+	+	+	+	+	+
chr18	55710714	55712346	0.441057	6.52366	8.14779	0.00431138	0.11932	ENSG00000049759	5	5	629	651	605	1203	483	1179	953	1174	793	1274	+	+	+	+	+	+	+	+	+	+
chr2	114341078	114342194	0.484871	5.22007	8.14459	0.00431898	0.119398	ENSG00000146556	5	5	381	210	234	427	140	646	330	432	250	636	+	+	+	+	+	+	+	+	+	+
chr9	103191542	103192022	-0.625472	4.28448	8.14362	0.0043213	0.119399	ENSG00000066697	5	5	157	170	226	268	225	159	140	131	107	201	+	+	+	+	+	+	+	+	+	+
chr13	37444701	37445410	-0.601518	4.3667	8.12839	0.00435775	0.119461	ENSG00000120693	5	5	148	216	174	301	213	215	118	216	123	208	+	+	+	+	+	+	+	+	+	+
chr7	78946759	78947513	-0.583784	4.18428	8.12202	0.00437307	0.119461	ENSG00000234456	5	5	155	189	132	242	204	180	108	161	150	153	+	+	+	+	+	+	+	+	+	+
chr5	112403306	112403989	0.665971	3.62719	8.11987	0.00437827	0.119461	ENSG00000172795	3	5	74	48	47	144	69	289	99	149	113	209	+	-	-	+	+	+	+	+	+	+
chr8	73643539	73644583	-0.600036	4.52822	8.13937	0.00433142	0.119461	ENSG00000182674	5	5	190	202	156	272	329	317	180	176	127	203	+	+	+	+	+	+	+	+	+	+
chr11	44972004	44972673	0.712458	3.78699	8.12525	0.0043653	0.119461	ENSG00000175274	3	5	147	91	107	173	27	118	165	184	93	202	+	-	+	+	-	+	+	+	+	+
chr11	61594994	61595966	0.537105	4.9991	8.14048	0.00432879	0.119461	ENSG00000149485	5	5	201	248	147	352	160	479	333	584	253	365	+	+	+	+	+	+	+	+	+	+
chr16	30905039	30905890	0.549327	4.75032	8.12776	0.00435925	0.119461	ENSG00000099385	5	5	257	169	244	293	109	198	408	379	159	297	+	+	+	+	+	+	+	+	+	+
chr3	142837955	142840302	0.438614	6.15082	8.12361	0.00436925	0.119461	ENSG00000175040	5	5	546	354	379	1023	375	1202	633	867	576	1172	+	+	+	+	+	+	+	+	+	+
chr7	135070094	135070455	0.894409	2.40748	8.12207	0.00437295	0.119461	ENSG00000080802	2	5	12	19	38	65	36	81	57	58	81	47	-	-	-	+	+	+	+	+	+	+
chr1	935287	936342	0.511644	4.8485	8.13187	0.00434938	0.119461	ENSG00000188290	5	5	295	252	268	206	133	179	426	358	153	356	+	+	+	+	+	+	+	+	+	+
chr2	55036963	55037295	-0.889188	3.2179	8.12643	0.00436246	0.119461	ENSG00000214595	5	5	64	64	95	112	163	116	56	65	38	79	+	+	+	+	+	+	+	+	+	+
chr1	142837386	142838109	-0.883203	2.65115	8.1233	0.00436999	0.119461	ENSG00000196369	2	3	68	61	101	79	52	57	43	23	31	40	-	+	+	-	-	+	+	-	+	-
chr3	189438578	189438939	0.879658	2.37045	8.13043	0.00435284	0.119461	ENSG00000090530	1	3	20	18	7	36	43	133	33	62	92	48	-	-	-	+	-	+	-	+	+	-
chr8	123093933	123094715	0.682803	3.89515	8.12297	0.00437079	0.119461	ENSG00000170961	4	5	85	60	51	129	99	410	109	155	238	129	+	+	-	+	+	+	+	+	+	+
chr7	128431033	128431955	0.57102	4.27148	8.13485	0.00434224	0.119461	ENSG00000128596	5	5	149	133	122	210	81	276	209	262	130	301	+	+	+	+	+	+	+	+	+	+
chr13	28413996	28414843	-0.737083	3.66799	8.12557	0.00436454	0.119461	ENSG00000139515	5	5	113	92	141	196	130	153	89	121	45	112	+	+	+	+	+	+	+	+	+	+
chr1	244614717	244615650	0.444389	6.65554	8.13753	0.00433584	0.119461	ENSG00000035687	5	5	755	654	638	1317	557	1167	1060	1396	850	1388	+	+	+	+	+	+	+	+	+	+
chr1	212003434	212004415	0.516118	5.01411	8.14054	0.00432864	0.119461	ENSG00000123684	5	5	251	206	170	453	139	398	378	439	209	535	+	+	+	+	+	+	+	+	+	+
chr3	178495356	178496147	-0.611286	4.32378	8.12169	0.00437387	0.119461	ENSG00000172667	5	5	140	167	193	308	235	211	127	186	114	196	+	+	+	+	+	+	+	+	+	+
chr8	30505185	30506155	-0.651161	3.83354	8.12129	0.00437485	0.119461	ENSG00000253457	5	5	142	111	117	227	139	192	88	128	95	104	+	+	+	+	+	+	+	+	+	+
chr10	19074925	19075595	0.903887	2.44488	8.12837	0.0043578	0.119461	ENSG00000165997	0	4	26	26	31	39	36	96	65	73	74	37	-	-	-	-	-	+	+	+	+	-
chr14	21537875	21539910	0.463639	5.94823	8.12705	0.00436097	0.119461	ENSG00000165801	5	5	516	373	359	904	277	772	702	792	452	918	+	+	+	+	+	+	+	+	+	+
chr20	2672768	2674541	0.530418	5.07635	8.13756	0.00433576	0.119461	ENSG00000088881	5	5	238	244	188	379	193	280	431	582	226	464	+	+	+	+	+	+	+	+	+	+
chr17	68164825	68166005	0.538838	5.21716	8.12062	0.00437645	0.119461	ENSG00000123700	5	5	282	233	248	563	130	510	360	438	369	507	+	+	+	+	+	+	+	+	+	+
chr7	57768152	57769104	-0.922095	2.69338	8.11711	0.00438494	0.11958	ENSG00000185290	3	1	62	72	61	104	71	43	45	17	33	75	-	+	-	+	+	-	-	-	-	+
chr3	31418557	31418978	-0.621263	3.91372	8.11589	0.00438789	0.119599	ENSG00000163527	5	5	127	147	140	235	152	144	132	120	85	109	+	+	+	+	+	+	+	+	+	+
chr6	96426078	96426481	-0.867925	2.24466	8.11444	0.0043914	0.119632	ENSG00000172469	3	1	46	46	44	51	71	34	29	27	40	24	-	+	-	+	+	-	-	-	+	-
chr2	65215531	65217199	0.440072	6.24796	8.11196	0.00439742	0.119734	ENSG00000115902	5	5	560	506	588	965	377	1038	784	884	687	954	+	+	+	+	+	+	+	+	+	+
chr11	76571546	76572382	0.472842	5.51187	8.11095	0.00439987	0.119738	ENSG00000078124	5	5	345	286	332	578	234	529	469	632	383	615	+	+	+	+	+	+	+	+	+	+
chr14	81603750	81604184	-0.751823	3.13498	8.10748	0.0044083	0.119905	ENSG00000165417	5	2	92	66	103	133	88	75	56	68	41	82	+	+	+	+	+	+	-	+	-	-
chr4	160023734	160025400	0.447178	6.9588	8.10646	0.00441077	0.11991	ENSG00000109756	5	5	825	866	633	1664	738	1507	1428	1695	931	1904	+	+	+	+	+	+	+	+	+	+
chr2	10182698	10184600	0.455104	6.5729	8.1019	0.00442189	0.12015	ENSG00000172059	5	5	833	662	642	1255	410	882	1254	1388	583	1256	+	+	+	+	+	+	+	+	+	+
chr4	57024629	57025011	-0.699221	3.45608	8.1	0.00442652	0.120162	ENSG00000109265	5	5	108	95	95	184	100	100	49	62	114	105	+	+	+	+	+	+	+	+	+	+
chr12	32831799	32832936	0.424842	6.79177	8.09898	0.00442903	0.120162	ENSG00000087470	5	5	681	703	570	1456	697	1760	1079	1483	892	1679	+	+	+	+	+	+	+	+	+	+
chr5	40791155	40791939	-0.77283	3.11666	8.0989	0.00442922	0.120162	ENSG00000132356	3	3	70	90	54	181	61	134	44	63	61	74	+	+	-	+	-	+	-	-	+	+
chr3	152123986	152124604	-0.681498	3.85984	8.09711	0.0044336	0.120219	ENSG00000152601	5	4	104	112	91	233	173	268	84	106	73	166	+	+	+	+	+	+	+	+	-	+
chr3	32432989	32434304	0.528534	4.75562	8.0951	0.00443852	0.12029	ENSG00000153551	5	5	204	154	158	392	128	350	333	320	215	382	+	+	+	+	+	+	+	+	+	+
chr18	73627995	73628666	0.693659	3.65009	8.09237	0.00444519	0.120409	ENSG00000101493	3	5	66	72	40	143	77	196	109	182	165	165	-	+	-	+	+	+	+	+	+	+
chr16	9057480	9058172	0.650104	3.82796	8.08851	0.00445468	0.120557	ENSG00000187555	1	5	97	77	86	209	57	118	265	200	74	176	-	-	-	+	-	+	+	+	+	+
chr6	79193945	79194701	0.715235	3.58214	8.08734	0.00445757	0.120557	ENSG00000146243	3	5	81	46	52	117	84	221	113	69	190	173	+	-	+	+	-	+	+	+	+	+
chr4	36677797	36678576	-0.809976	3.12805	8.08736	0.0044575	0.120557	ENSG00000047365	5	3	66	87	65	157	109	63	63	54	38	108	+	+	+	+	+	+	+	-	-	+
chr18	61603284	61604210	0.477525	5.2022	8.08303	0.00446818	0.120578	ENSG00000166401	5	5	253	203	251	405	250	578	381	412	338	494	+	+	+	+	+	+	+	+	+	+
chr14	38429908	38430497	-0.864961	2.70116	8.07357	0.00449154	0.120578	ENSG00000139874	3	2	75	52	46	104	63	62	36	58	18	93	-	+	-	+	+	-	-	+	-	+
chr1	108248709	108249334	0.661381	4.02908	8.08395	0.0044659	0.120578	ENSG00000134215	5	5	80	59	76	159	123	436	149	170	143	248	+	+	+	+	+	+	+	+	+	+
chr20	38889796	38890192	-0.831709	2.7077	8.08065	0.00447404	0.120578	ENSG00000237767	4	4	50	59	48	91	71	118	26	59	37	55	-	+	+	+	+	+	-	+	+	+
chr14	92302136	92303268	0.462883	5.58568	8.07377	0.00449105	0.120578	ENSG00000165929	5	5	419	366	422	524	211	513	606	522	364	575	+	+	+	+	+	+	+	+	+	+
chr3	26141198	26141581	-1.00212	1.99334	8.07914	0.00447776	0.120578	ENSG00000151092	3	0	26	26	69	68	50	22	23	25	19	22	-	-	+	+	+	-	-	-	-	-
chr4	25031824	25033152	0.547177	4.802	8.07942	0.00447709	0.120578	ENSG00000153012	5	5	214	153	140	401	134	393	273	280	299	447	+	+	+	+	+	+	+	+	+	+
chr3	113381921	113382472	-0.783588	3.91351	8.07669	0.00448382	0.120578	ENSG00000176542	5	3	105	76	107	319	148	328	44	141	147	78	+	+	+	+	+	+	-	+	+	-
chr20	19192309	19194051	0.570639	4.70799	8.07622	0.004485	0.120578	ENSG00000185052	2	5	173	184	139	369	107	361	303	327	239	347	-	+	-	+	-	+	+	+	+	+
chr4	31366601	31367376	0.705506	4.18725	8.07304	0.00449288	0.120578	ENSG00000169851	5	5	90	61	62	193	153	441	226	175	126	310	+	+	+	+	+	+	+	+	+	+
chr5	14664048	14665475	0.424851	6.45256	8.08484	0.00446371	0.120578	ENSG00000154124	5	5	634	575	558	1114	507	1133	946	1135	712	1199	+	+	+	+	+	+	+	+	+	+
chr3	10050558	10050962	0.617217	4.33291	8.0754	0.00448701	0.120578	ENSG00000125037	5	5	105	147	166	223	87	289	213	275	157	282	+	+	+	+	+	+	+	+	+	+
chr18	2050409	2051178	-0.770201	2.81879	8.07692	0.00448327	0.120578	ENSG00000101574	3	2	53	51	81	163	65	37	90	46	28	34	-	+	+	+	-	-	+	-	+	-
chr6	128716298	128716626	-1.00248	2.68308	8.07346	0.00449182	0.120578	ENSG00000152894	2	4	45	40	59	79	115	94	39	54	19	46	-	-	-	+	+	+	+	+	-	+
chr14	105940052	105941521	0.514906	5.62372	8.07505	0.00448788	0.120578	ENSG00000182809	5	5	419	332	262	610	226	519	561	853	359	635	+	+	+	+	+	+	+	+	+	+
chr11	108487211	108487690	-0.912172	2.39384	8.07039	0.00449945	0.120693	ENSG00000110723	4	1	53	22	77	128	44	22	57	37	15	24	+	-	+	+	+	-	+	-	-	-
chr1	92495306	92495971	0.70316	3.33099	8.06935	0.00450202	0.1207	ENSG00000069702	1	5	57	61	56	126	43	154	118	114	78	170	-	-	-	+	-	+	+	+	+	+
chr15	32980149	32980890	-0.623997	4.36441	8.06702	0.00450781	0.120793	ENSG00000166923	5	5	144	184	213	416	170	189	112	167	141	220	+	+	+	+	+	+	+	+	+	+
chr2	128458537	128459926	0.442922	6.22519	8.06524	0.00451224	0.12085	ENSG00000136709	5	5	491	461	407	956	475	1031	754	1008	572	1216	+	+	+	+	+	+	+	+	+	+
chr7	6703529	6704116	0.895648	2.3189	8.05926	0.00452717	0.121188	ENSG00000205903	1	5	37	28	23	63	13	60	58	52	48	87	-	-	-	+	-	+	+	+	+	+
chr12	9066352	9067840	0.436548	6.17162	8.05744	0.00453171	0.121248	ENSG00000111752	5	5	472	499	377	824	473	1087	667	874	672	1099	+	+	+	+	+	+	+	+	+	+
chr18	35040453	35040949	0.857195	3.435	8.05612	0.00453502	0.121274	ENSG00000101489	2	5	55	13	30	99	99	288	90	148	127	129	-	-	-	+	+	+	+	+	+	+
chr4	177909345	177909874	-0.569258	4.8926	8.05434	0.00453947	0.121331	ENSG00000150630	5	5	270	286	272	389	296	340	206	301	218	164	+	+	+	+	+	+	+	+	+	+
chr2	190258226	190258636	-0.946839	2.19438	8.05313	0.00454251	0.121351	ENSG00000115368	3	0	39	32	51	71	62	41	31	30	16	39	-	-	+	+	+	-	-	-	-	-
chr14	62279218	62280064	0.748944	2.94785	8.05055	0.00454898	0.121461	ENSG00000023608	1	5	55	34	43	95	35	100	97	99	55	127	-	-	-	+	-	+	+	+	+	+
chr2	39251768	39252348	-0.691272	3.57991	8.04555	0.00456155	0.121705	ENSG00000115904	5	5	118	104	89	162	141	117	56	119	94	101	+	+	+	+	+	+	+	+	+	+
chr2	165192468	165192894	0.56379	4.34492	8.04508	0.00456274	0.121705	ENSG00000115290	5	5	95	90	85	222	212	308	206	230	271	227	+	+	+	+	+	+	+	+	+	+
chr1	152025819	152026291	0.762713	3.06935	8.04278	0.00456853	0.121735	ENSG00000163191	2	5	34	55	32	98	36	176	96	105	61	134	-	+	-	+	-	+	+	+	+	+
chr9	68472609	68472987	-0.966826	2.26356	8.04344	0.00456686	0.121735	ENSG00000170161	5	2	90	52	47	44	41	37	31	16	18	42	+	+	+	+	+	-	+	-	-	+
chr4	12704527	12705103	0.638348	4.17426	8.03929	0.00457736	0.121909	ENSG00000157869	5	5	84	74	61	177	185	363	172	137	243	261	+	+	+	+	+	+	+	+	+	+
chr5	31213662	31214179	-0.978185	2.6179	8.03807	0.00458044	0.121929	ENSG00000113361	3	3	49	50	41	116	45	107	7	57	61	52	+	-	+	+	-	+	-	+	+	-
chr18	65183100	65184715	0.435246	7.83595	8.03467	0.00458903	0.122095	ENSG00000071991	5	5	1614	1654	1437	2881	1243	2863	2187	2716	2154	3436	+	+	+	+	+	+	+	+	+	+
chr3	171847556	171848356	-0.500419	5.08517	8.03345	0.00459212	0.122115	ENSG00000075420	5	5	280	313	268	573	277	486	230	268	232	331	+	+	+	+	+	+	+	+	+	+
chr21	35444852	35446532	0.452478	6.046	8.02796	0.00460608	0.122238	ENSG00000243927	5	5	467	471	432	941	310	628	988	932	393	813	+	+	+	+	+	+	+	+	+	+
chr1	2158749	2159720	0.560846	5.4234	8.02808	0.00460577	0.122238	ENSG00000157933	5	5	384	313	277	576	151	311	662	616	284	502	+	+	+	+	+	+	+	+	+	+
chr8	6590288	6591129	0.731201	3.09351	8.02975	0.00460151	0.122238	ENSG00000155189	0	4	52	32	39	99	45	189	74	77	111	114	-	-	-	-	-	+	-	+	+	+
chr11	69459055	69459397	0.761706	2.89056	8.02905	0.0046033	0.122238	ENSG00000110092	1	4	46	40	26	74	48	95	90	107	71	105	-	-	-	-	+	+	+	+	+	-
chr5	77346803	77347151	-0.974694	1.87907	8.02311	0.00461843	0.122504	ENSG00000171530	3	1	25	52	17	68	40	31	37	25	15	19	-	+	-	+	+	-	+	-	-	-
chr10	14447649	14448130	0.93427	2.47129	8.01932	0.00462808	0.122654	ENSG00000151474	0	5	37	16	19	26	39	135	36	58	57	112	-	-	-	-	-	+	+	+	+	+
chr19	30155984	30156617	0.600791	4.21047	8.01906	0.00462876	0.122654	ENSG00000166289	5	5	174	111	170	218	65	170	241	234	134	224	+	+	+	+	+	+	+	+	+	+
chr16	66638509	66639466	0.742201	3.59267	8.01328	0.00464355	0.122834	ENSG00000140931	1	5	77	91	84	153	37	102	138	169	112	179	-	-	-	+	-	+	+	+	+	+
chr17	16394906	16395871	0.700162	3.68739	8.01198	0.00464689	0.122834	ENSG00000181350	2	5	108	93	73	153	32	145	207	199	61	162	-	-	+	+	-	+	+	+	+	+
chr13	73878007	73878297	-0.936866	2.49841	8.00417	0.00466697	0.122834	ENSG00000102554	3	1	46	84	35	58	69	35	18	87	27	44	-	+	-	+	+	-	-	+	-	-
chr9	25677369	25678744	0.411245	7.16813	8.01126	0.00464875	0.122834	ENSG00000198680	5	5	969	923	874	1748	872	2324	1376	1793	1151	2157	+	+	+	+	+	+	+	+	+	+
chr13	93822297	93822701	-0.885403	2.9651	8.00479	0.00466538	0.122834	ENSG00000183098	4	3	47	118	113	100	65	55	46	65	39	42	-	+	+	+	+	+	-	+	+	-
chr5	83433586	83433962	-0.934188	2.04924	8.01112	0.0046491	0.122834	ENSG00000164176	4	1	35	56	36	50	48	34	25	25	18	38	-	+	+	+	+	-	-	-	-	+
chr7	64541182	64541980	0.459257	5.48004	8.01133	0.00464856	0.122834	ENSG00000234585	5	5	329	271	247	470	324	657	453	481	446	626	+	+	+	+	+	+	+	+	+	+
chr2	17841672	17842066	1.05188	1.92842	8.00312	0.00466967	0.122834	ENSG00000178295	0	3	8	13	16	28	22	87	17	53	69	43	-	-	-	-	-	+	-	+	+	-
chr4	170736866	170737114	-0.81885	2.65353	8.00462	0.00466582	0.122834	ENSG00000056050	3	3	51	83	60	68	81	40	43	44	29	56	-	+	+	-	+	-	+	+	-	+
chr18	36056506	36056875	-1.01167	1.92276	8.00522	0.00466427	0.122834	ENSG00000101489	3	2	25	39	28	53	43	62	11	24	38	19	-	+	-	+	+	+	-	-	+	-
chr17	17343529	17344218	-0.815301	3.23249	8.00981	0.00465246	0.122834	ENSG00000141026	4	4	66	55	73	192	83	180	36	111	32	103	+	-	+	+	+	+	-	+	+	+
chr5	102090075	102091264	0.468312	5.80029	8.00421	0.00466688	0.122834	ENSG00000145730	5	5	388	292	284	889	276	859	496	698	503	898	+	+	+	+	+	+	+	+	+	+
chr12	56516457	56516765	0.722895	3.63407	8.00695	0.00465981	0.122834	ENSG00000139641	1	5	65	29	32	127	103	362	109	131	131	165	-	-	-	-	+	+	+	+	+	+
chr4	123072975	123074212	0.438172	6.40968	8.00271	0.00467074	0.122834	ENSG00000138688	5	5	613	554	510	1185	421	1328	891	907	724	1250	+	+	+	+	+	+	+	+	+	+
chr4	114366967	114367525	-0.587854	4.21206	8.00317	0.00466955	0.122834	ENSG00000145349	5	5	137	152	142	323	236	141	172	159	100	167	+	+	+	+	+	+	+	+	+	+
chr7	49758154	49758663	-0.771663	2.67543	7.99973	0.00467844	0.122975	ENSG00000132436	3	2	48	68	40	102	81	57	53	59	35	39	-	+	-	+	+	-	+	+	-	-
chr19	18547802	18549072	0.603147	4.49491	7.99556	0.00468921	0.123074	ENSG00000105655	2	5	188	218	147	197	88	214	227	322	227	272	-	+	-	-	+	+	+	+	+	+
chr12	44754225	44754603	-1.02243	1.97289	7.99498	0.00469071	0.123074	ENSG00000139173	2	3	31	28	21	70	50	47	9	44	21	42	-	-	-	+	+	+	-	+	-	+
chr5	60139045	60140562	0.427098	6.36543	7.99464	0.0046916	0.123074	ENSG00000164181	5	5	587	491	499	1171	447	1190	826	997	683	1246	+	+	+	+	+	+	+	+	+	+
chr10	16426060	16426600	0.766978	3.70937	7.99487	0.00469101	0.123074	ENSG00000165983	1	5	50	51	46	90	137	243	108	235	103	221	-	-	-	-	+	+	+	+	+	+
chr7	44787734	44789182	0.505892	6.215	7.99034	0.00470277	0.123176	ENSG00000122515	5	5	617	500	480	1099	293	698	934	1050	570	939	+	+	+	+	+	+	+	+	+	+
[truncated: 50,389 more rows]
