# Supplementary material for: Type 2 Diabetes–Associated Genetic Variants Regulate Chromatin Accessibility in Human Islets
Source: Oxford University Press journal article supplement (doi:10.2337/db18-0393), 2018-09-04
Supplement: db180393supplementarytable11.xlsx [file db180393supplementarytable11.xlsx]

## Sheet: Sheet1
Table S10: Differentially expressed genes in T2D islets
chr	start	end	strand	gene	logFC	logCPM	PValue	AdjustedPValue
chr2	171669723	171717661	+	ENSG00000128683	1.51004	3.71485	1.86263e-20	1.88424e-16
chr1	145726918	145764074	+	ENSG00000174827	1.07741	5.00933	3.32231e-15	1.68043e-11
chr19	18718240	18731849	+	ENSG00000105696	1.16014	4.56967	1.20043e-11	4.04785e-08
chr3	149191761	149221068	+	ENSG00000169903	1.40268	9.6922	1.10929e-10	2.8054e-07
chr10	99624757	99790585	-	ENSG00000095713	1.30267	3.85422	1.71516e-09	3.47012e-06
chr20	17206752	17465223	+	ENSG00000125851	1.08437	9.50811	2.51204e-09	4.2353e-06
chr9	112137974	112260593	-	ENSG00000070159	-0.667477	7.2485	8.20137e-09	1.18522e-05
chr17	7482785	7485429	+	ENSG00000129226	-1.14793	6.59437	2.38563e-08	3.01663e-05
chr1	565020	566063	+	ENSG00000225630	-0.808328	6.99077	3.14187e-08	3.53147e-05
chr10	100007447	100028007	-	ENSG00000138131	1.20799	8.34741	5.20439e-08	5.26476e-05
chr10	100143322	100174941	-	ENSG00000119943	1.19745	4.20594	1.91003e-07	0.000161016
chr5	150400124	150408554	+	ENSG00000211445	0.65778	9.29358	1.8019e-07	0.000161016
chr19	35645633	35660786	+	ENSG00000089327	0.97245	6.49775	2.09121e-07	0.000162728
chr14	21269387	21271437	-	ENSG00000129538	-0.668365	5.40102	5.99455e-07	0.000427721
chr3	14444076	14530857	+	ENSG00000131389	-0.747949	8.40395	6.34225e-07	0.000427721
chr7	48128225	48148330	+	ENSG00000183696	-0.708991	4.33423	9.90576e-07	0.000626292
chr1	569076	569756	+	ENSG00000248527	-0.625657	9.46047	1.52495e-06	0.000907435
chr2	162999392	163008914	-	ENSG00000115263	1.8443	15.1874	2.23317e-06	0.000983168
chr6	42931608	42946958	-	ENSG00000124587	0.984351	4.98396	1.85401e-06	0.000983168
chr22	24813847	24838328	+	ENSG00000128271	0.910519	4.05621	2.16035e-06	0.000983168
chr9	131174030	131199626	+	ENSG00000167123	0.672272	5.73186	2.42973e-06	0.000983168
chr1	161494036	161496681	+	ENSG00000173110	-1.7491	5.52453	2.23237e-06	0.000983168
chr3	177990720	178562217	+	ENSG00000197584	0.743311	6.35151	1.87715e-06	0.000983168
chr22	25675496	25679061	-	ENSG00000233577	1.1532	1.44619	2.26539e-06	0.000983168
chr7	143339348	143534026	-	ENSG00000253882	-0.725648	5.10591	2.34431e-06	0.000983168
chr20	33759876	33765165	+	ENSG00000101000	-0.792158	3.96402	2.6327e-06	0.00102432
chr20	36531499	36573752	+	ENSG00000132821	0.943328	3.77029	3.40837e-06	0.001277
chr16	57576333	57625593	+	ENSG00000159618	1.23482	5.20191	3.55256e-06	0.00128349
chr7	98444111	98468394	-	ENSG00000166448	0.937469	3.97944	5.02639e-06	0.00175334
chr5	169780491	170163636	+	ENSG00000182132	1.04123	3.57408	5.25185e-06	0.00177092
chr2	79384132	79386879	-	ENSG00000172016	0.981309	9.94358	6.02225e-06	0.0019652
chr7	30893010	30965131	+	ENSG00000240583	0.746748	6.49604	7.29442e-06	0.00230595
chr14	94770585	94789731	-	ENSG00000170099	1.22696	4.15717	7.97139e-06	0.00237172
chr6	31982539	32003195	+	ENSG00000224389	0.905097	6.00715	7.74816e-06	0.00237172
chr22	26565440	26779562	+	ENSG00000100095	0.632276	7.61755	9.40724e-06	0.00271896
chr22	24979718	25024972	+	ENSG00000100031	0.807789	5.25902	1.0372e-05	0.00283575
chr1	89472349	89488577	-	ENSG00000117226	1.11125	4.96572	1.01725e-05	0.00283575
chr2	191745553	191830278	+	ENSG00000115419	0.770424	8.82125	1.1294e-05	0.00288353
chr11	86502101	86663886	+	ENSG00000150687	-0.555037	8.13112	1.12526e-05	0.00288353
chr4	141309609	141349122	-	ENSG00000153132	-0.790318	6.02109	1.14018e-05	0.00288353
chr7	56131695	56148363	+	ENSG00000129103	0.517021	7.77704	1.27756e-05	0.00315213
chr4	187187099	187210835	+	ENSG00000088926	0.80743	3.6562	1.94231e-05	0.00456939
chr6	105606155	105627870	-	ENSG00000132429	0.905389	3.02006	1.92196e-05	0.00456939
chr9	116822407	116840752	-	ENSG00000106927	0.795639	5.44148	2.01879e-05	0.00464138
chr5	132532147	132948255	-	ENSG00000053108	1.11494	5.44341	2.30989e-05	0.00497168
chr13	113777128	113803843	+	ENSG00000126218	0.740717	5.86744	2.27537e-05	0.00497168
chr3	52082935	52090566	-	ENSG00000164086	0.690769	4.49981	2.24148e-05	0.00497168
chr13	72012098	72441330	-	ENSG00000165659	0.610156	5.43654	2.46654e-05	0.00519824
chr6	122793062	123047518	+	ENSG00000135549	-0.73851	5.95506	3.18426e-05	0.00656483
chr7	20257200	20261323	+	ENSG00000233834	0.788376	2.54421	3.24477e-05	0.00656483
chr9	108456825	108538893	+	ENSG00000095209	-0.53114	5.0984	3.42882e-05	0.00680117
chr4	86936276	87515284	-	ENSG00000109339	0.658372	5.74138	4.09975e-05	0.0079756
chr3	183967438	184010819	+	ENSG00000145194	0.889025	4.14565	4.23313e-05	0.00804605
chr4	187130133	187179625	+	ENSG00000164344	0.791254	3.41242	4.29505e-05	0.00804605
chr16	20320894	20339130	-	ENSG00000169347	1.0674	5.53054	4.56525e-05	0.00839674
chr1	220701568	220837803	+	ENSG00000116141	-0.548516	5.58596	4.74987e-05	0.00858031
chr6	90074355	90121989	-	ENSG00000025039	-0.698492	7.21188	5.03508e-05	0.0089072
chr11	65265233	65273940	+	ENSG00000251562	-0.518534	10.3673	5.10693e-05	0.0089072
chr2	154728426	155310361	+	ENSG00000144278	0.620492	4.65316	5.77483e-05	0.00990139
chr22	25745510	25746289	-	ENSG00000231466	1.20983	2.28789	5.96345e-05	0.0100544
chr2	217122588	217236750	-	ENSG00000144583	0.747525	4.86216	6.12508e-05	0.0101576
chr19	35606732	35615227	+	ENSG00000089356	0.87999	5.52551	6.9428e-05	0.011328
chr5	10971952	11904155	-	ENSG00000169862	0.579952	4.82859	7.45697e-05	0.0118793
chr1	16888923	16940083	-	ENSG00000219481	-0.566884	6.47291	7.5156e-05	0.0118793
chr6	53794780	54131078	+	ENSG00000146147	0.748433	4.29188	7.67662e-05	0.0119472
chr11	57364860	57382326	+	ENSG00000149131	0.860367	6.84465	8.50752e-05	0.0130066
chr6	139693393	139695757	-	ENSG00000164442	-0.574069	6.60896	8.61451e-05	0.0130066
chr12	47158546	47226191	-	ENSG00000139209	0.987462	7.59154	0.000110465	0.0164333
chr7	140774032	141180180	+	ENSG00000261115	0.483243	6.26705	0.000112963	0.0165613
chr9	132245730	132275947	+	ENSG00000204054	-0.679885	5.40593	0.000118476	0.0171214
chr12	52345451	52390862	+	ENSG00000135503	-0.452097	6.51554	0.000134398	0.0191489
chr2	219854911	219858143	-	ENSG00000163499	0.97981	6.42323	0.000143929	0.020222
chr9	72435709	72521148	+	ENSG00000204711	-1.13995	2.51047	0.00014851	0.0205798
chr19	45312328	45324673	+	ENSG00000187244	0.735576	6.69506	0.00015584	0.0213037
chr12	56473641	56497289	+	ENSG00000065361	0.651272	5.82951	0.000161683	0.0218078
chr3	108308529	108413693	+	ENSG00000198919	0.480723	7.38874	0.000171906	0.0228816
chr16	57023397	57117443	+	ENSG00000140853	-0.710965	4.657	0.00017662	0.0232037
chr4	167654535	168155947	-	ENSG00000196104	0.950974	4.3552	0.000183148	0.0237529
chr15	98462784	98517068	+	ENSG00000140450	0.484906	6.76948	0.000189317	0.0242421
chr6	84743475	84800600	+	ENSG00000135324	0.731082	5.38825	0.000197183	0.024626
chr4	106965474	107242652	-	ENSG00000145348	0.504007	5.54444	0.000195679	0.024626
chr11	100900355	101001255	-	ENSG00000082175	0.547213	6.10879	0.000205509	0.0252081
chr18	29171689	29178974	+	ENSG00000118271	0.799833	12.8177	0.00020724	0.0252081
chr4	159122756	159176563	+	ENSG00000164124	-0.879103	4.46479	0.00020932	0.0252081
chr1	33351595	33364042	+	ENSG00000121905	1.02605	2.79107	0.000215152	0.025485
chr12	57910371	57914300	-	ENSG00000175197	-1.06157	6.03556	0.000216658	0.025485
chr9	139933922	139940655	-	ENSG00000107281	0.513783	6.65399	0.000231466	0.0263091
chr19	38734675	38783254	+	ENSG00000167642	0.539547	9.45144	0.000228704	0.0263091
chr4	162305049	163085187	-	ENSG00000168843	1.23909	5.62461	0.000230656	0.0263091
chr2	14772810	14790933	+	ENSG00000162981	0.878614	5.16302	0.000234228	0.0263273
chr12	15034115	15038860	-	ENSG00000111341	0.876405	3.49499	0.000239467	0.0266203
chr6	28048753	28057341	+	ENSG00000197279	-0.911566	3.89009	0.000244469	0.0268809
chr19	1578011	1605483	-	ENSG00000267059	1.61837	2.98164	0.000255167	0.0277556
chr7	150488373	150498450	-	ENSG00000106565	0.68698	7.55456	0.00026183	0.0281774
chr6	87862551	87973914	+	ENSG00000188994	-0.733194	7.63117	0.000271755	0.0289376
chr17	39958199	39968856	-	ENSG00000141696	0.492967	4.93227	0.000282708	0.0297904
chr8	67088620	67090960	-	ENSG00000147571	1.49683	3.95094	0.000297583	0.0307178
chr4	99391518	99579780	-	ENSG00000168785	0.712211	4.5323	0.000295682	0.0307178
chr13	93879095	95055812	+	ENSG00000183098	0.99908	3.77676	0.000310885	0.0317668
chr10	131934663	131982785	+	ENSG00000108010	-0.452506	5.99673	0.000315736	0.0319398
chr11	124503009	124565603	-	ENSG00000110013	0.579714	6.3597	0.000337882	0.0338417
chr2	119981384	120023228	+	ENSG00000115107	-0.754116	5.27313	0.000348594	0.0345723
chr1	159557615	159558655	+	ENSG00000132703	1.61592	3.58512	0.000356374	0.0350008
chr19	33864236	33873591	+	ENSG00000153879	-0.6084	6.43443	0.000367894	0.0357848
chr10	95753746	96088149	+	ENSG00000138193	1.56243	7.10855	0.000375456	0.0361725
chr1	16944751	16971178	-	ENSG00000215908	-0.559802	4.29584	0.000383719	0.0366198
chr16	82068609	82132139	+	ENSG00000086696	0.76197	4.01871	0.000405207	0.0383091
chr19	42177235	42210895	-	ENSG00000007306	1.28952	5.91745	0.000421362	0.0394676
chr12	7022909	7032861	+	ENSG00000111674	-0.816334	8.50733	0.000441141	0.0399012
chr1	146714291	146767443	+	ENSG00000131778	-0.408474	5.88005	0.000432021	0.0399012
chr9	116848406	116861571	-	ENSG00000136883	0.593923	5.61568	0.000442827	0.0399012
chr19	50030875	50050219	+	ENSG00000142552	1.40913	3.94015	0.000434103	0.0399012
chr2	219845809	219850379	-	ENSG00000163497	1.14587	3.61598	0.000445713	0.0399012
chr18	31431064	31804916	-	ENSG00000101746	0.453546	6.2004	0.000455459	0.0400646
chr4	77356253	77704406	+	ENSG00000138771	0.406896	6.27834	0.000453371	0.0400646
chr4	3508103	3534286	-	ENSG00000163956	0.439904	7.63608	0.000466228	0.0406583
chr9	35792151	35809729	+	ENSG00000159899	-0.695585	4.77792	0.000474249	0.0410043
chr16	84002237	84036381	+	ENSG00000103154	1.0848	3.64976	0.000488384	0.0415804
chr11	94822974	94865809	+	ENSG00000149218	-0.51709	6.3552	0.000489133	0.0415804
chr5	89825161	90460038	+	ENSG00000164199	0.541528	6.15436	0.000511707	0.0431369
chr12	3186521	3395730	+	ENSG00000011105	0.592263	5.36945	0.000531574	0.0437187
chr12	52400724	52409673	+	ENSG00000161835	-0.805403	4.54895	0.000525467	0.0437187
chr6	31949801	31970458	+	ENSG00000244731	0.79688	5.88874	0.000528028	0.0437187
chr6	26124373	26139336	+	ENSG00000180573	1.33812	4.53283	0.000576408	0.0470237
chr22	38864067	38879452	+	ENSG00000100196	0.510128	4.3099	0.000582767	0.047068
chr12	57914493	57923931	+	ENSG00000166987	-0.382388	6.14517	0.000586256	0.047068
chr3	99536678	99897447	+	ENSG00000184220	-0.50489	4.30963	0.000598908	0.0477052
chr2	1792885	2335032	-	ENSG00000186487	0.558995	4.86584	0.000634895	0.0501765
chr2	235401685	235405697	-	ENSG00000188042	0.60973	5.59718	0.000683163	0.0533883
chr6	111303218	111347303	+	ENSG00000197498	-0.435544	4.7534	0.000686089	0.0533883
chr14	38677204	38682272	+	ENSG00000139874	0.457244	5.61751	0.000695849	0.0537344
chr2	44502599	44548633	+	ENSG00000138079	0.805316	5.49819	0.00070416	0.0539044
chr8	145734457	145736569	+	ENSG00000167700	0.61822	3.18156	0.000708707	0.0539044
chr9	92219928	92221470	+	ENSG00000130222	0.627737	3.93591	0.000719932	0.0539815
chr5	95549050	95550779	-	ENSG00000249746	1.39089	3.85302	0.000720394	0.0539815
chr11	117672445	117699413	-	ENSG00000137731	-1.35286	8.07872	0.000741194	0.0551317
chr4	2249159	2264021	-	ENSG00000123933	0.460045	5.40766	0.000750648	0.0554274
chr12	7282294	7311541	+	ENSG00000139182	0.37637	6.83615	0.000756252	0.0554365
chr9	136397286	136440641	+	ENSG00000197859	0.683414	6.2726	0.000788564	0.0573893
chr14	94843084	94857030	-	ENSG00000197249	1.15383	10.0761	0.000802511	0.0579871
chr7	157331750	158380480	-	ENSG00000155093	0.553678	8.31928	0.00080939	0.0580694
chr1	39303870	39325495	-	ENSG00000116954	-0.434516	5.88435	0.000865094	0.0616288
chr5	57878048	58155213	+	ENSG00000152932	0.440868	6.71593	0.000941708	0.0666176
chr6	43573053	43596899	-	ENSG00000172432	-0.4275	6.45688	0.00101264	0.0706474
chr22	39214457	39239987	-	ENSG00000221890	0.525677	5.75222	0.00100767	0.0706474
chr14	68086515	68118437	+	ENSG00000081181	-0.950685	5.67362	0.00103229	0.0712834
chr8	15274724	15624158	+	ENSG00000104723	0.472787	8.81645	0.00103585	0.0712834
chr11	59480929	59573354	+	ENSG00000166900	-0.422167	6.93249	0.00105108	0.0713603
chr3	161062580	161090668	-	ENSG00000196542	0.622481	4.89026	0.00104519	0.0713603
chr14	89078775	89259096	-	ENSG00000165521	-0.673186	6.33621	0.0011347	0.0765243
chr6	7541808	7586950	+	ENSG00000096696	-0.502136	10.3671	0.00118083	0.0791077
chr1	19578033	19586622	+	ENSG00000053372	-0.420098	5.03496	0.00120762	0.0803705
chr11	86152150	86383678	-	ENSG00000151376	-0.431991	5.29852	0.00123988	0.0817364
chr4	39455744	39460568	-	ENSG00000163682	-0.56695	8.31618	0.00124431	0.0817364
chr20	43880880	43883205	-	ENSG00000124107	0.718603	4.08762	0.00128509	0.0838705
chr20	361261	378203	+	ENSG00000101255	-0.687861	5.90432	0.00132239	0.0857452
chr2	37571717	37600465	+	ENSG00000115828	0.460963	8.47332	0.00133076	0.0857452
chr1	176432307	176814735	+	ENSG00000116183	1.45778	7.97353	0.0013526	0.0866004
chr22	43231418	43411151	-	ENSG00000100266	-0.588564	7.373	0.00139882	0.0888196
chr14	88490894	88563276	+	ENSG00000258867	-0.755676	2.66631	0.00140482	0.0888196
chr2	201450591	201541787	+	ENSG00000138356	0.5973	6.40212	0.00142588	0.0895915
chr7	73703805	73820273	+	ENSG00000106665	0.417682	5.59139	0.00144107	0.089987
chr20	19867165	19983101	+	ENSG00000132669	0.37903	7.1865	0.00146482	0.0909087
chr3	9975506	9987097	+	ENSG00000163703	0.370966	6.30289	0.00148402	0.0915389
chr12	49315301	49320257	-	ENSG00000134285	0.561265	5.39512	0.00150899	0.0919572
chr2	162848751	162931052	-	ENSG00000197635	0.626056	5.58739	0.00150868	0.0919572
chr6	2988221	3019996	+	ENSG00000124588	-0.682876	4.11769	0.00153468	0.0924095
chr3	123001143	123168605	-	ENSG00000173175	0.983237	5.07336	0.00153028	0.0924095
chr2	10085341	10142411	+	ENSG00000134317	0.410265	4.34284	0.00155363	0.0929972
chr13	96085858	96231906	+	ENSG00000134873	0.889804	4.70132	0.00157661	0.0938175
chr2	234263153	234380750	+	ENSG00000077044	-0.469707	5.63374	0.00165674	0.0980094
chr1	77333126	77531396	+	ENSG00000117069	0.572527	3.94101	0.00167998	0.0983933
chr1	212606229	212619714	+	ENSG00000117691	0.411383	6.7266	0.00168268	0.0983933
chr4	158125334	158287227	+	ENSG00000120251	0.520825	5.81388	0.00171466	0.0996868
chr10	75572259	75634343	-	ENSG00000148660	0.481083	6.09311	0.00175024	0.101174
chr12	64798130	64844907	+	ENSG00000184575	-0.410038	7.41092	0.00177627	0.102095
chr11	11984653	12031316	-	ENSG00000050165	1.07983	5.70296	0.00178987	0.102296
chr2	50145643	51259674	-	ENSG00000179915	0.40927	6.06277	0.00182262	0.103582
chr20	627259	656444	-	ENSG00000172070	-0.669988	7.33494	0.00183453	0.103677
chr1	24122089	24127271	-	ENSG00000117308	-0.509722	4.72019	0.00187107	0.104551
chr4	72607410	72669758	-	ENSG00000145321	0.703243	8.96785	0.00187473	0.104551
chr10	119040000	119134978	-	ENSG00000165650	-0.350864	7.0387	0.001881	0.104551
chr13	24144509	24250232	+	ENSG00000127863	0.572826	5.51723	0.00189622	0.104821
chr11	107992243	108018503	+	ENSG00000075239	-0.371667	7.08636	0.00194212	0.106233
chr20	38633119	38637171	+	ENSG00000237767	0.688349	3.46753	0.00194277	0.106233
chr19	18942747	18979045	+	ENSG00000005007	0.333905	6.66204	0.00199768	0.10719
chr5	149781200	149792492	-	ENSG00000019582	0.997748	6.41911	0.0020069	0.10719
chr11	61727190	61735132	-	ENSG00000167996	-0.845308	11.6838	0.00199507	0.10719
chr8	28203102	28260218	-	ENSG00000186918	-0.692926	7.96203	0.0020021	0.10719
chr6	29523292	29527702	-	ENSG00000213886	0.615585	6.23294	0.00201326	0.10719
chr19	11685475	11689823	-	ENSG00000102575	0.553277	3.83454	0.00205715	0.107944
chr11	46402306	46405375	+	ENSG00000110492	0.499299	6.02787	0.00204463	0.107944
chr12	72056789	72074419	+	ENSG00000173451	0.469538	4.4593	0.00205943	0.107944
chr22	31677579	31688520	-	ENSG00000100100	0.604524	4.37541	0.00210729	0.109883
chr1	27992572	27998729	-	ENSG00000126709	0.51138	5.45929	0.00214328	0.111187
chr4	187508937	187647876	-	ENSG00000083857	0.516426	7.94343	0.00215601	0.111276
chr3	100053545	100074449	+	ENSG00000114021	-0.3948	5.4666	0.00231086	0.118663
chr7	99775186	99819111	+	ENSG00000066923	0.552028	3.70654	0.00235209	0.118969
chr10	81370695	81375197	+	ENSG00000122852	0.509387	4.75285	0.00233696	0.118969
chr17	71171622	71172772	+	ENSG00000260248	0.50645	3.44013	0.00234275	0.118969
chr14	23815515	23822121	-	ENSG00000092096	0.468116	7.4967	0.00239233	0.119806
chr17	1477673	1532180	-	ENSG00000167703	0.693694	6.12582	0.0023876	0.119806
chr8	97657455	98161882	+	ENSG00000104324	0.448477	6.58834	0.00241149	0.120099
chr12	6643093	6647537	+	ENSG00000111640	-0.569582	11.1904	0.00245754	0.120099
chr2	136664247	136743670	-	ENSG00000115866	-0.417778	7.08687	0.00244682	0.120099
chr10	99526508	99531709	-	ENSG00000120057	2.11892	4.07888	0.00243082	0.120099
chr11	10326227	10328944	+	ENSG00000148926	-1.35705	5.299	0.00243865	0.120099
chr3	52489134	52527087	+	ENSG00000010322	0.468948	7.47169	0.00250253	0.121709
chr6	31654726	31671221	-	ENSG00000204427	0.353123	6.22695	0.00253708	0.122799
chr21	41239243	41301322	+	ENSG00000183036	0.809719	5.73599	0.00257071	0.123835
chr9	113006091	113018920	-	ENSG00000136810	-0.479892	7.17064	0.00260548	0.124326
chr3	2140497	3099645	+	ENSG00000144619	0.568053	5.95261	0.00259821	0.124326
chr19	9964394	10047228	-	ENSG00000105088	0.403212	6.18651	0.00264388	0.125377
chr10	135138927	135150475	-	ENSG00000130643	0.944948	4.16166	0.00267801	0.125377
chr7	128095903	128098472	+	ENSG00000135245	-1.15479	5.22224	0.0026662	0.125377
chr1	19967048	19984945	+	ENSG00000158747	0.568477	5.85169	0.00269944	0.125377
chr17	45968621	45973178	-	ENSG00000264920	-0.625475	2.09419	0.00267912	0.125377
chr19	39432044	39466550	-	ENSG00000269190	-0.544584	5.30458	0.00270187	0.125377
chr7	64451187	64467121	-	ENSG00000213462	0.884833	5.06478	0.00273426	0.1263
chr3	5229331	5261642	+	ENSG00000134109	-0.403897	6.62571	0.00276298	0.127047
chr2	173420101	173489823	+	ENSG00000152256	-0.948648	4.43459	0.00281248	0.128738
chr2	46520806	46613836	+	ENSG00000116016	-0.489405	7.99787	0.0028613	0.129798
chr22	38201114	38203442	+	ENSG00000189060	-0.391774	7.83332	0.00285837	0.129798
chr7	16685756	16746148	+	ENSG00000136261	-0.421242	5.28519	0.00289502	0.130741
chr1	84330711	84464833	-	ENSG00000137941	0.342246	6.1886	0.00290972	0.130821
chr7	2291405	2393953	-	ENSG00000106266	-0.502391	4.2045	0.00293668	0.131449
chr22	25747385	25801344	-	ENSG00000100068	0.440017	4.52714	0.00297851	0.132734
chr2	112895962	112945791	+	ENSG00000144152	0.748238	3.785	0.00304622	0.134985
chr3	18486516	18959184	+	ENSG00000228956	0.735483	2.76873	0.0030557	0.134985
chr10	28966271	28971868	+	ENSG00000095739	0.608	3.86009	0.00311308	0.135741
chr19	36358801	36370693	+	ENSG00000105290	0.388876	8.18556	0.00310892	0.135741
chr2	189156396	189460653	+	ENSG00000144366	-1.00272	5.41404	0.00311219	0.135741
chr12	117153593	117175875	-	ENSG00000111412	-0.406926	5.53374	0.0031405	0.135766
chr9	130922539	130926207	+	ENSG00000171159	0.413635	4.43339	0.00313428	0.135766
chr2	98962618	99015064	+	ENSG00000144191	-0.576368	4.97192	0.00319959	0.137732
chr11	73019334	73080136	+	ENSG00000110237	0.590859	5.80914	0.00326238	0.138363
chr11	112831997	113149158	+	ENSG00000149294	0.373378	6.97259	0.00326896	0.138363
chr4	74262831	74287129	+	ENSG00000163631	1.46296	7.33857	0.00323281	0.138363
chr16	56716336	56718108	+	ENSG00000187193	-0.472425	5.09507	0.00324364	0.138363
chr1	8921061	8939308	-	ENSG00000074800	-0.53554	10.3367	0.00330096	0.139136
chr6	52285106	52387892	+	ENSG00000096093	0.463399	5.56066	0.0033625	0.13998
chr2	38150330	38294285	+	ENSG00000115841	0.526546	3.01997	0.00335922	0.13998
chr3	75955846	77699115	+	ENSG00000185008	0.613273	6.9668	0.0033546	0.13998
chr7	153584182	154685995	+	ENSG00000130226	0.413477	7.2569	0.00344877	0.142983
chr11	59620273	59634048	-	ENSG00000134827	1.38058	4.1735	0.00348979	0.144093
chr8	128747680	128753674	+	ENSG00000136997	-0.459081	4.44547	0.00358391	0.147377
chr9	88641061	88715088	-	ENSG00000135052	0.341776	7.78325	0.00361012	0.147854
chr2	120187477	120196096	+	ENSG00000171227	-0.418552	5.81348	0.00364505	0.148085
chr1	153507075	153508720	-	ENSG00000197956	-0.497987	8.25729	0.00364331	0.148085
chr14	93799565	94174222	+	ENSG00000133958	0.411057	6.54214	0.00373688	0.151209
chr17	36686251	36762183	-	ENSG00000017373	0.567419	4.76428	0.00383536	0.154576
chr21	48018875	48025121	-	ENSG00000160307	1.22261	2.20027	0.00385349	0.15469
chr22	18958027	19018742	+	ENSG00000237517	-0.628828	5.10954	0.00394602	0.157778
chr19	5158506	5340814	-	ENSG00000105426	0.437478	5.6885	0.00399888	0.159262
chr2	219283815	219318018	+	ENSG00000127831	0.499966	6.04011	0.00402129	0.159527
chr19	49468558	49470135	+	ENSG00000087086	-0.924752	12.0406	0.00407959	0.159829
chr11	14665269	14892350	+	ENSG00000152270	0.654649	6.70599	0.0040921	0.159829
chr21	30244513	30257693	-	ENSG00000156239	0.414949	4.52126	0.00407041	0.159829
chr14	70320848	70499083	+	ENSG00000198732	0.95094	7.11981	0.00407655	0.159829
chr22	24110413	24126503	+	ENSG00000099953	1.17698	4.56106	0.00414409	0.161237
chr8	139142266	139509065	-	ENSG00000147724	0.467693	5.04211	0.00419603	0.162012
chr20	23026270	23030378	-	ENSG00000178726	0.628797	5.54904	0.0041827	0.162012
chr17	41166622	41177140	-	ENSG00000108828	-0.473802	8.65954	0.00428688	0.16489
chr1	223394161	223537544	-	ENSG00000143502	0.476838	6.30257	0.00431373	0.165294
chr20	3767578	3786762	+	ENSG00000101224	0.514656	5.31767	0.00436068	0.165838
chr1	43629846	43727589	-	ENSG00000117395	-0.337492	5.84838	0.00437709	0.165838
chr15	89179384	89199714	+	ENSG00000172183	-0.773685	3.14386	0.00436578	0.165838
chr11	73498361	73576178	+	ENSG00000175581	-0.428608	4.48978	0.00444134	0.167644
chr16	765115	769499	+	ENSG00000103260	0.481849	4.64085	0.00450024	0.169236
chr11	57174427	57195053	-	ENSG00000134802	-0.487548	4.96236	0.00452127	0.169397
chr3	195975101	196045170	-	ENSG00000213123	0.546372	2.72228	0.00454762	0.169755
chr11	111473115	111601577	+	ENSG00000170145	0.325397	7.54829	0.00461954	0.170552
chr16	29882480	29910868	-	ENSG00000174938	0.388963	8.00194	0.0046132	0.170552
chr16	1114093	1128731	-	ENSG00000261713	0.668478	5.33965	0.00458947	0.170552
chr14	60062694	60337684	-	ENSG00000139970	0.357375	6.74198	0.00485578	0.178595
chr22	38597889	38612518	+	ENSG00000185022	-0.644072	4.34752	0.0048727	0.178595
chr6	43005355	43021683	-	ENSG00000044090	0.29792	6.5921	0.00505597	0.179944
chr5	172195093	172198198	-	ENSG00000120129	-0.362919	5.82485	0.00493733	0.179944
chr3	5020801	5027008	+	ENSG00000134107	-0.545675	8.05334	0.00510518	0.179944
chr1	120162045	120190396	-	ENSG00000143067	-0.385176	4.95375	0.00508623	0.179944
chr9	22002902	22009362	-	ENSG00000147883	0.423333	5.26934	0.00508689	0.179944
chr2	155554811	155714863	+	ENSG00000162989	0.74633	4.7128	0.00496215	0.179944
chr12	112597992	112819896	-	ENSG00000173064	0.390735	7.72657	0.0049681	0.179944
chr7	192969	300711	+	ENSG00000177706	0.393996	4.49933	0.00508954	0.179944
chr9	90112143	90323548	+	ENSG00000196730	0.387671	6.94117	0.0050853	0.179944
chr2	69947923	70053596	+	ENSG00000196975	0.40507	8.6419	0.005065	0.179944
chr16	16404198	16444435	+	ENSG00000244257	0.794922	5.25356	0.00499213	0.179944
chr20	32077881	32237842	+	ENSG00000078699	0.361394	6.75413	0.0051662	0.179992
chr11	695616	705028	+	ENSG00000177042	0.426228	4.75988	0.00512756	0.179992
chr12	6994062	6994848	+	ENSG00000248593	-0.647165	2.11772	0.00517772	0.179992
chr19	18263968	18288927	+	ENSG00000268173	0.356694	6.03003	0.00517295	0.179992
chr4	89647106	90032549	-	ENSG00000138640	-0.36156	5.69728	0.00533617	0.182143
chr9	19108373	19149288	-	ENSG00000147872	-0.67658	6.71036	0.00533611	0.182143
chr1	207101863	207119811	-	ENSG00000162896	1.08696	6.50562	0.00533337	0.182143
chr1	155165379	155178842	-	ENSG00000169231	0.510632	4.62505	0.00532778	0.182143
chr3	152552736	152555841	+	ENSG00000169860	0.781514	4.49817	0.00533968	0.182143
chr9	139971953	139978991	+	ENSG00000197355	-0.528352	5.5617	0.00534761	0.182143
chr3	183637722	183735803	-	ENSG00000114770	0.52783	6.58415	0.0055875	0.189041
chr2	220238268	220264744	-	ENSG00000123992	-0.393292	5.79585	0.00557288	0.189041
chr14	21152372	21168757	+	ENSG00000181784	0.540396	4.58496	0.00576813	0.194501
chr8	97505579	97624000	+	ENSG00000169439	0.479216	7.35934	0.00580205	0.194995
chr7	150497491	150502208	+	ENSG00000002933	0.607765	6.68539	0.00583409	0.195263
chr5	2752245	2755508	+	ENSG00000186493	0.707036	3.98045	0.00584863	0.195263
chr1	156669398	156675608	-	ENSG00000143320	-0.941738	2.75466	0.00600362	0.198526
chr17	1839299	1928178	-	ENSG00000185924	0.465456	3.45748	0.00600523	0.198526
chr11	65190245	65213011	+	ENSG00000245532	-0.685389	9.97742	0.00600223	0.198526
chr21	35275757	35288284	-	ENSG00000241837	-0.358779	7.03237	0.00603432	0.198838
chr14	51441980	51562779	-	ENSG00000100505	-0.4807	5.94616	0.0060575	0.198953
chr11	66112843	66115163	-	ENSG00000174684	0.355336	5.30581	0.00608074	0.19907
chr1	222988364	223010726	+	ENSG00000228106	-0.548948	2.61074	0.00612722	0.199945
chr14	62584197	62596352	+	ENSG00000186369	0.630924	5.26306	0.00616157	0.200079
chr7	99798276	99869837	-	ENSG00000239521	0.380502	4.66935	0.00617088	0.200079
chr4	39500375	39529931	-	ENSG00000109814	-0.451713	7.22552	0.00624114	0.201394
chr11	118868852	118886501	+	ENSG00000186166	-0.367087	4.42679	0.00625127	0.201394
chr10	105726959	105788991	+	ENSG00000065613	-0.313079	7.34022	0.00639417	0.203143
chr14	90722839	90738968	+	ENSG00000100764	-0.320465	7.12986	0.00637843	0.203143
chr13	96230457	96296957	-	ENSG00000134874	0.466396	5.61156	0.00640594	0.203143
chr15	55473004	55489265	-	ENSG00000137876	-0.357653	6.97264	0.00633173	0.203143
chr18	19230858	19284766	-	ENSG00000158201	-0.461325	6.03471	0.00635804	0.203143
chr19	49141199	49149569	-	ENSG00000063180	0.441739	4.7147	0.00647716	0.203664
chr10	102106877	102124591	+	ENSG00000099194	-0.489227	9.72974	0.00649963	0.203664
chr12	6976283	6980112	+	ENSG00000111669	-0.505789	9.30917	0.0064524	0.203664
chr5	2745959	2752969	-	ENSG00000170561	0.596578	5.56319	0.00650291	0.203664
chr17	63006833	63052957	-	ENSG00000120063	-0.373281	6.79169	0.00668913	0.208849
chr12	41086244	41465772	+	ENSG00000018236	0.407791	8.46508	0.00675406	0.210063
chr17	68049570	68131749	+	ENSG00000153822	0.643977	4.54354	0.00676951	0.210063
chr1	112313284	112531777	-	ENSG00000171385	0.573555	5.51175	0.00685248	0.211987
chr11	47440320	47447993	-	ENSG00000165916	-0.340198	6.49454	0.00689138	0.21254
chr11	65306276	65326401	-	ENSG00000168056	0.593586	6.47435	0.00700246	0.214009
chr22	41829496	41843027	-	ENSG00000183864	0.371828	5.65174	0.00697871	0.214009
chr10	61496753	61513203	-	ENSG00000227877	0.918854	3.76855	0.00698271	0.214009
chr1	2398898	2436969	+	ENSG00000149527	0.83488	5.52582	0.00706787	0.215357
chr2	8818975	8824583	+	ENSG00000115738	-0.519863	6.56693	0.0071274	0.216519
chr2	88469835	88486146	+	ENSG00000144115	-0.487049	4.87619	0.00724531	0.219442
chr2	8992820	9143942	-	ENSG00000143797	0.442157	5.93245	0.00737937	0.222835
chr_GL000219.1	53831	99642	-	ENSG00000220023	0.518429	5.0899	0.00745168	0.224349
chr1	214156524	214214853	+	ENSG00000117707	0.375662	6.29342	0.00750577	0.225307
chr15	68499330	68549549	-	ENSG00000128973	-0.407066	4.56989	0.00755038	0.225975
chr6	150139934	150186199	-	ENSG00000120256	0.333143	7.65813	0.00764	0.227846
chr21	32490734	32932290	-	ENSG00000156299	0.337635	5.96278	0.00765792	0.227846
chr15	65822756	65870687	+	ENSG00000074696	0.325097	8.11458	0.0077008	0.228398
chr10	74033678	74035794	+	ENSG00000168209	-0.551075	7.39612	0.00772165	0.228398
chr11	2904443	2907111	-	ENSG00000129757	-0.765492	6.9043	0.00786906	0.23208
chr19	2997636	3047633	-	ENSG00000065717	0.407052	5.64165	0.00791866	0.232189
chr2	163027194	163101661	-	ENSG00000078098	0.7781	7.72102	0.00791394	0.232189
chr7	101459219	101927250	+	ENSG00000257923	0.327221	6.91727	0.00799291	0.233689
chr18	672543	712676	-	ENSG00000132199	-0.305787	5.84653	0.00807821	0.234152
chr4	113152893	113191203	+	ENSG00000138660	-0.409769	5.44896	0.00806992	0.234152
chr16	70010200	70099851	-	ENSG00000196696	0.357945	5.83997	0.00805357	0.234152
chr2	120197419	120282070	-	ENSG00000080293	0.724276	5.00268	0.00814456	0.234599
chr13	48807294	48837063	+	ENSG00000136156	0.363906	9.39213	0.00812621	0.234599
chr2	189839046	189877472	+	ENSG00000168542	2.12904	8.68975	0.00819563	0.234599
chr19	39693471	39694906	-	ENSG00000179751	-2.05414	3.15273	0.00820957	0.234599
chr1	762988	794826	+	ENSG00000228794	0.327031	6.68358	0.00819302	0.234599
chr2	160956177	161128399	-	ENSG00000115221	0.853078	6.23264	0.00823709	0.234722
chr14	24678789	24683075	-	ENSG00000254505	-0.361005	4.88443	0.00835941	0.237087
chr7	139877061	139879440	+	ENSG00000260231	-0.413111	4.00319	0.00836694	0.237087
chr2	97371666	97405801	-	ENSG00000114988	0.334258	5.36561	0.00843445	0.238235
chr10	121410882	121437331	+	ENSG00000151929	-0.35037	5.86632	0.00845456	0.238235
chr13	76123619	76180085	+	ENSG00000118939	-0.338257	5.01408	0.00852042	0.238997
chr8	144989321	145050902	-	ENSG00000178209	0.295213	6.68536	0.00852886	0.238997
chr22	24322339	24326106	+	ENSG00000099984	-1.51722	2.77678	0.00857747	0.239695
chr15	77400471	77712486	-	ENSG00000173517	0.525998	5.89533	0.00865529	0.240541
chr9	111892573	111898218	-	ENSG00000260230	0.395919	5.49319	0.00863663	0.240541
chr20	2673480	2740754	+	ENSG00000088881	0.496424	3.46403	0.00868979	0.240838
chr19	19976695	20005483	+	ENSG00000256771	0.394608	4.87947	0.00878722	0.242873
chr2	179328391	179343327	-	ENSG00000079150	0.451398	3.71846	0.00883737	0.243594
chr6	82879700	82957471	-	ENSG00000005700	-0.324461	7.3641	0.00898166	0.245563
chr3	184908412	184999778	-	ENSG00000113790	0.355086	5.00748	0.00898097	0.245563
chr1	151227179	151239955	+	ENSG00000159352	-0.31851	6.66159	0.0089392	0.245563
chr6	3224517	3231964	-	ENSG00000137285	-0.877643	4.99009	0.00901925	0.245926
chr3	18386864	18487080	-	ENSG00000182568	0.472738	6.04417	0.00906037	0.246384
chr1	134901	139697	-	ENSG00000237683	-0.514042	4.54774	0.00919068	0.249257
chr2	151324709	151395525	-	ENSG00000115963	-0.505467	5.33127	0.00932066	0.252106
chr17	64208151	64252643	-	ENSG00000091583	0.485517	5.31231	0.00944863	0.254886
chr11	57295936	57298276	-	ENSG00000134809	-0.467583	4.30587	0.00957218	0.256849
chr22	44639547	44708731	-	ENSG00000138944	1.25755	5.87524	0.00956447	0.256849
chr17	7093209	7123369	-	ENSG00000132535	0.311113	6.07123	0.00967546	0.258934
chr10	5406972	5416169	+	ENSG00000178473	0.48535	5.78285	0.00979728	0.261502
chr2	99061317	99207496	+	ENSG00000040933	0.355182	6.19929	0.00990632	0.263717
chr1	65886248	66107242	+	ENSG00000116678	0.553026	5.34442	0.0100352	0.266448
chr6	13791020	13814800	-	ENSG00000050393	-0.343384	4.3517	0.0100909	0.267089
chr16	87863629	87903094	-	ENSG00000103257	-0.649866	7.59342	0.0101639	0.267089
chr17	26900133	26904282	-	ENSG00000109107	-0.610883	6.09707	0.0101347	0.267089
chr14	71787166	72207946	+	ENSG00000197555	0.316118	6.70844	0.010165	0.267089
chr12	49582519	49667114	+	ENSG00000167553	-0.439495	7.20269	0.0102227	0.267909
chr17	30651584	30677042	-	ENSG00000108666	-0.336605	4.56391	0.0102747	0.268576
chr2	182537815	182545603	-	ENSG00000162992	0.316465	7.88182	0.0103098	0.2688
chr8	134249414	134314265	-	ENSG00000104419	-0.600808	8.92316	0.0104695	0.271563
chr7	76940068	77046115	-	ENSG00000186088	0.345753	5.21694	0.0104563	0.271563
chr2	216225163	216300895	-	ENSG00000115414	2.02136	9.30433	0.0105709	0.273055
chr1	150190717	150208504	-	ENSG00000143401	-0.334098	6.26255	0.010581	0.273055
chr1	52811395	52831865	-	ENSG00000154222	-0.313035	6.18158	0.010641	0.273903
chr22	37764000	37823505	-	ENSG00000166897	1.84714	5.75789	0.0107398	0.275746
chr14	26912299	27066960	-	ENSG00000139910	0.435749	4.54444	0.0108015	0.276627
chr22	25960816	26118601	+	ENSG00000100077	0.34457	5.4362	0.0109392	0.278992
chr2	113403434	113421404	+	ENSG00000144136	-0.35005	5.45999	0.010949	0.278992
chr19	49403307	49426629	+	ENSG00000104805	0.415253	8.3043	0.0110715	0.280701
chr19	50979657	50986608	+	ENSG00000161671	0.431521	8.52409	0.0110678	0.280701
chr1	232533711	232697304	-	ENSG00000116991	-0.388624	6.59679	0.0111993	0.282638
chr3	32147181	32210205	+	ENSG00000152642	-0.359535	5.86355	0.0112038	0.282638
chr14	35747839	35786699	+	ENSG00000100902	-0.309097	6.86533	0.0112788	0.283116
chr16	67708436	67753324	-	ENSG00000141098	0.345551	4.48892	0.011268	0.283116
chr18	5232875	5246507	+	ENSG00000263753	0.296763	5.8697	0.0113293	0.283682
chr1	43391519	43424530	-	ENSG00000117394	-0.655308	6.29818	0.0114411	0.285438
chr5	8457606	8460776	+	ENSG00000247516	-0.515087	3.29681	0.0114559	0.285438
chr7	2598632	2654368	+	ENSG00000106012	0.3394	5.26362	0.0115423	0.286883
chr17	76849059	76921469	-	ENSG00000035862	0.432988	9.51469	0.0117098	0.290334
chr12	58142034	58149796	-	ENSG00000135446	-0.359306	6.6999	0.011752	0.290667
chr15	32933877	32989299	+	ENSG00000166922	0.403656	10.8588	0.0118139	0.291487
chr12	120759914	120765592	-	ENSG00000170890	-1.46211	6.73852	0.01192	0.293388
chr17	43209967	43221548	+	ENSG00000181513	0.469501	3.64277	0.0119507	0.293431
chr4	42410390	42659122	-	ENSG00000124406	0.353592	7.02146	0.0120044	0.294036
chr2	54950636	55199157	+	ENSG00000214595	0.70143	5.37129	0.0120424	0.294253
chr1	149900543	149908791	-	ENSG00000014914	-0.424911	4.81638	0.0122035	0.295595
chr14	34901995	34931562	-	ENSG00000165389	-0.312776	5.82327	0.0121502	0.295595
chr10	95326422	95349829	+	ENSG00000186188	-1.09143	4.89724	0.0122434	0.295595
chr7	10971578	10979883	-	ENSG00000189043	-0.293151	6.32309	0.012228	0.295595
chr1	110693108	110744824	+	ENSG00000197106	-0.460939	7.16912	0.0121839	0.295595
chr1	201924619	201939789	+	ENSG00000134375	-0.318161	5.61791	0.0124454	0.297515
chr2	97481982	97499648	+	ENSG00000168763	0.308809	5.78563	0.0124173	0.297515
chr2	166326157	166545917	+	ENSG00000178662	0.314176	5.92631	0.0124824	0.297515
chr13	77454312	77460540	-	ENSG00000178695	0.595375	7.57438	0.0124666	0.297515
chr6	26055968	26056699	-	ENSG00000187837	-0.477606	4.7751	0.0124099	0.297515
chr10	124768495	124817827	+	ENSG00000196177	-0.467228	5.62641	0.0124994	0.297515
chr9	133320094	133376661	+	ENSG00000130707	0.55726	5.49764	0.0125659	0.298396
chr3	110788918	110994410	+	ENSG00000177707	-0.373202	6.49935	0.0127664	0.302448
chr10	69556427	69597924	-	ENSG00000108176	-0.458513	7.03874	0.0128593	0.303529
chr7	76239303	76256578	-	ENSG00000146707	0.834461	3.38388	0.0128721	0.303529
chr15	73344051	73597547	+	ENSG00000067141	0.400806	7.27695	0.0132601	0.308401
chr10	21068902	21463116	-	ENSG00000078114	-0.312241	7.3941	0.0133294	0.308401
chr13	102375035	103054124	-	ENSG00000102466	0.42276	3.08476	0.0133518	0.308401
chr1	67465015	67519782	-	ENSG00000116704	0.406761	5.33129	0.013353	0.308401
chr13	41763969	41768702	-	ENSG00000120696	0.333795	5.06006	0.0133468	0.308401
chr10	18429606	18830798	+	ENSG00000165995	0.327028	4.79446	0.0132893	0.308401
chr5	176784838	176799602	+	ENSG00000169220	0.794334	3.1059	0.0131487	0.308401
chr6	147163702	147525750	-	ENSG00000233452	0.389644	3.58589	0.01333	0.308401
chr12	7072409	7073610	+	ENSG00000257084	-0.611299	2.12826	0.0131154	0.308401
chr9	37650997	37746901	+	ENSG00000070601	0.468514	2.99681	0.0134776	0.309164
chr17	41150290	41154976	+	ENSG00000131469	-0.374995	8.46187	0.0134337	0.309164
chr11	62599814	62609281	-	ENSG00000133316	-0.351457	4.45429	0.0134884	0.309164
chr13	51483814	51544592	+	ENSG00000136104	-0.343147	4.45295	0.0135084	0.309164
chr14	31760994	31889788	-	ENSG00000129493	0.357662	5.82909	0.0135732	0.309533
chr10	81838402	81852313	+	ENSG00000133678	0.336684	4.64008	0.013615	0.309533
chr1	38272651	38275126	+	ENSG00000197982	0.363555	5.11176	0.0136677	0.309533
chr6	31795512	31798031	+	ENSG00000204388	-0.41591	8.17923	0.0136775	0.309533
chr17	62962668	62971694	-	ENSG00000214174	-0.421459	4.24246	0.0136461	0.309533
chr20	32676104	32700138	-	ENSG00000125977	-0.319843	7.24402	0.0137342	0.309891
chr2	69240310	69476459	+	ENSG00000169604	0.929809	4.88393	0.0137545	0.309891
chr19	49375649	49379314	+	ENSG00000087074	-0.543548	6.47127	0.0138404	0.310441
chr7	65670186	65885530	+	ENSG00000169902	0.4759	5.2547	0.0138251	0.310441
chr16	30103635	30108236	-	ENSG00000090238	0.361359	4.57693	0.0139021	0.310915
chr18	20378224	20606451	+	ENSG00000101773	-0.378339	5.78646	0.0139229	0.310915
chr12	93771659	93797024	+	ENSG00000173598	0.34022	7.78678	0.0140902	0.313958
chr2	131350339	131357123	-	ENSG00000136698	0.358496	8.10804	0.0142209	0.316173
chr7	97881691	97937162	+	ENSG00000164713	-0.39864	6.13985	0.0143145	0.317556
chr1	109756540	109780791	+	ENSG00000031698	-0.439016	8.09496	0.0143909	0.318552
chr7	95212811	95225803	-	ENSG00000004799	0.710504	9.23533	0.0144722	0.319653
chr13	29233241	29253062	+	ENSG00000132963	-0.311374	6.58624	0.0145572	0.320133
chr2	73956231	73964527	-	ENSG00000144034	-0.371499	4.41511	0.0145329	0.320133
chr1	108113782	108507766	-	ENSG00000134215	0.683613	4.84462	0.0146371	0.320754
chr17	77906142	78009647	-	ENSG00000167291	0.293658	5.84838	0.0146489	0.320754
chr12	57522276	57607134	+	ENSG00000123384	0.708783	7.2385	0.0146885	0.320926
chr6	143816614	143832827	-	ENSG00000001036	-0.513883	6.57996	0.0147934	0.322179
chr9	116638562	116818871	+	ENSG00000157657	0.516064	5.73541	0.0148095	0.322179
chr3	81538850	81811312	-	ENSG00000114480	-0.4253	6.25107	0.0149167	0.323121
chr11	64037534	64056972	+	ENSG00000173264	0.354387	4.50663	0.0149028	0.323121
chr3	53880607	53899827	+	ENSG00000056736	-0.324113	5.26122	0.015104	0.323919
chr1	94333373	94345474	-	ENSG00000067334	-0.264877	6.44988	0.0152097	0.323919
chr1	45976708	45988719	-	ENSG00000117450	-0.26418	7.81091	0.0151853	0.323919
chr12	7079944	7095921	+	ENSG00000126749	-0.312601	4.72828	0.0151059	0.323919
chr1	150954493	150968110	+	ENSG00000143412	0.456857	3.6856	0.0152065	0.323919
chr11	119288090	119295695	-	ENSG00000154096	1.94523	3.85922	0.0151751	0.323919
chr12	111051832	111087235	+	ENSG00000204852	0.276736	6.00085	0.0150553	0.323919
chr4	178650792	178829090	-	ENSG00000251504	1.14348	2.81718	0.015018	0.323919
chr19	44126520	44143991	-	ENSG00000105767	0.466136	4.62293	0.0154525	0.324445
chr5	34915481	34926101	+	ENSG00000113460	-0.305758	4.94898	0.0154501	0.324445
chr1	184356192	184598154	+	ENSG00000116667	0.433819	4.21986	0.015491	0.324445
chr12	26272959	26278060	-	ENSG00000123095	-0.328988	5.83086	0.0154634	0.324445
chr19	14519631	14530192	-	ENSG00000123136	-0.366313	5.35703	0.0153618	0.324445
chr11	236546	252983	+	ENSG00000185627	-0.257137	6.57911	0.0154035	0.324445
chr14	53106634	53162618	-	ENSG00000197930	-0.560502	7.89141	0.0153604	0.324445
chr19	58360099	58400442	-	ENSG00000204514	0.404594	4.76533	0.0154015	0.324445
chr1	57184477	57285369	-	ENSG00000187889	0.497468	3.55273	0.0155543	0.325098
chr15	52413117	52483566	-	ENSG00000069966	0.364298	5.49337	0.015803	0.325479
chr16	70286293	70323446	-	ENSG00000090861	-0.330791	8.31698	0.0156853	0.325479
chr17	48445218	48450575	-	ENSG00000108826	-0.331805	5.20427	0.0157886	0.325479
chr8	71547553	71581409	-	ENSG00000147592	-0.393771	4.86141	0.0157651	0.325479
chr1	150254953	150259505	+	ENSG00000159208	-0.646355	3.57707	0.0157783	0.325479
chr4	7967039	8160559	-	ENSG00000163995	0.358115	4.91642	0.0158299	0.325479
chr11	46698630	46722165	-	ENSG00000175220	0.341117	7.31258	0.0157279	0.325479
chr2	131174328	131188936	-	ENSG00000178162	0.317067	7.04486	0.0157815	0.325479
chr14	93389425	93401638	+	ENSG00000100604	0.811682	11.0351	0.0159279	0.326829
chr12	8071826	8088871	-	ENSG00000059804	-0.629474	5.08731	0.0162367	0.327869
chr16	75661622	75682541	-	ENSG00000065427	-0.259428	7.23743	0.016096	0.327869
chr13	27998681	28009958	+	ENSG00000122034	-0.271813	6.39724	0.0162145	0.327869
chr17	39775689	39781094	-	ENSG00000128422	0.587473	4.44112	0.0162379	0.327869
chr2	79252812	79255631	+	ENSG00000143954	1.048	4.18617	0.0162142	0.327869
chr5	145967936	146464347	-	ENSG00000156475	0.898455	3.90065	0.0162181	0.327869
chr3	183547173	183602721	-	ENSG00000175193	-0.347418	5.01726	0.0160373	0.327869
chr21	46683843	46707813	-	ENSG00000186866	0.285016	5.64187	0.0162318	0.327869
chr6	170844205	170862429	-	ENSG00000008018	-0.300163	7.13977	0.016373	0.32839
chr2	10580094	10588630	-	ENSG00000115758	-0.333314	7.09673	0.0163465	0.32839
chr11	6416354	6440644	-	ENSG00000166313	0.313703	6.72309	0.0164212	0.32839
chr8	54879112	54935089	-	ENSG00000187735	-0.303823	7.52485	0.0163449	0.32839
chr15	83211951	83317612	-	ENSG00000214575	-0.39163	4.4426	0.016426	0.32839
chr8	75233365	75401107	+	ENSG00000104381	-0.284825	6.07694	0.0165078	0.329374
chr1	115590632	115632121	-	ENSG00000134198	0.331198	6.27587	0.0166006	0.330574
chr9	127115745	127177723	-	ENSG00000136930	-0.274185	6.50635	0.0167423	0.331438
chr11	64008475	64011604	+	ENSG00000173486	0.334447	6.71179	0.0167354	0.331438
chr4	71768043	71888166	+	ENSG00000173542	0.322102	8.17537	0.0167299	0.331438
chr6	43737921	43754224	+	ENSG00000112715	-0.365556	9.80447	0.016864	0.332916
chr6	31733367	31745108	-	ENSG00000204396	0.42568	5.91856	0.0168828	0.332916
chr12	51317255	51326300	+	ENSG00000185432	0.413828	5.64351	0.0169626	0.33384
chr1	201951500	201975275	+	ENSG00000176393	0.303664	6.04616	0.0170203	0.334325
chr5	141371314	141392606	-	ENSG00000113552	-0.404416	6.57682	0.0171793	0.336794
chr10	3818188	3827473	-	ENSG00000067082	-0.326989	7.20852	0.0172204	0.336946
chr19	50364461	50371166	-	ENSG00000039650	-0.319634	4.45554	0.0174778	0.341322
chr17	41476327	41478492	+	ENSG00000175906	-0.686838	3.61089	0.0175369	0.341817
chr8	144099399	144105249	+	ENSG00000160932	0.426213	4.73237	0.0176327	0.343023
chr13	103451399	103493885	+	ENSG00000134897	0.326445	5.67905	0.0176844	0.34337
chr5	159436120	159492518	+	ENSG00000113312	-0.284807	5.97345	0.0177428	0.343844
chr12	54104903	54121529	-	ENSG00000012822	0.265897	6.05548	0.0183013	0.344316
chr4	72053003	72437804	+	ENSG00000080493	0.345568	7.61574	0.0182851	0.344316
chr13	101706130	102068843	-	ENSG00000102452	0.336988	5.14167	0.0182416	0.344316
chr7	73113536	73134002	-	ENSG00000106089	-0.45741	7.7122	0.0178989	0.344316
chr6	138483058	138665800	+	ENSG00000112379	0.319193	9.0147	0.018468	0.344316
chr2	85774743	85788670	-	ENSG00000115486	0.419782	5.37338	0.0182858	0.344316
chr6	160181360	160200144	+	ENSG00000120437	-0.328354	5.53901	0.0181271	0.344316
chr9	36136730	36163910	+	ENSG00000122694	0.595332	3.23088	0.01835	0.344316
chr19	14543865	14582679	+	ENSG00000123143	-0.435636	6.7541	0.0183924	0.344316
chr1	159682079	159684379	-	ENSG00000132693	1.17733	7.32392	0.0182841	0.344316
chr16	1756184	1820318	+	ENSG00000138834	0.308548	6.34646	0.018482	0.344316
chr1	151313116	151319833	-	ENSG00000143390	0.33058	5.18158	0.0184709	0.344316
chr1	1288069	1297157	-	ENSG00000162576	1.13846	3.00835	0.0182304	0.344316
chr11	93211638	93276674	-	ENSG00000166002	0.598334	4.46147	0.018106	0.344316
chr19	54960065	54973217	+	ENSG00000167615	0.387828	7.98121	0.0183296	0.344316
chr6	157802165	158099178	+	ENSG00000175048	0.339867	4.92349	0.0178922	0.344316
chr2	242498136	242513546	+	ENSG00000176720	0.339434	4.66407	0.0181518	0.344316
chr12	57643392	57824788	-	ENSG00000179912	0.267856	6.23299	0.0180568	0.344316
chr1	234040679	234460262	+	ENSG00000183780	0.399828	4.6914	0.017968	0.344316
chr2	110371911	110376563	+	ENSG00000198142	-0.407408	4.82453	0.0179809	0.344316
chr14	104148699	104150352	-	ENSG00000246451	0.755663	3.41206	0.0182403	0.344316
chr4	68566998	68946670	+	ENSG00000248049	-0.377524	4.13765	0.0186875	0.347504
chr17	4046462	4090605	+	ENSG00000167740	0.318768	5.466	0.0188073	0.347815
chr3	167967310	168548387	+	ENSG00000206120	0.806912	2.55619	0.0187499	0.347815
chr12	58003963	58013162	+	ENSG00000240771	0.515674	3.46624	0.0187891	0.347815
chr15	75011883	75017951	-	ENSG00000140465	1.28068	4.73638	0.0188858	0.348629
chr8	23386318	23432976	+	ENSG00000147454	0.471514	5.76349	0.0189374	0.348946
chr12	6308881	6347425	+	ENSG00000010278	-0.437663	6.47561	0.019024	0.349752
chr4	156587863	156653501	+	ENSG00000164116	0.384925	5.73089	0.0190504	0.349752
chr19	42254885	42276113	+	ENSG00000086548	1.09355	5.96909	0.0191328	0.350629
chr3	132036211	132087142	+	ENSG00000014257	0.76269	4.15468	0.0192769	0.351858
chr4	144257915	144395721	+	ENSG00000109458	0.39404	4.73389	0.0193042	0.351858
chr17	7214643	7218883	-	ENSG00000132522	-0.32565	5.74647	0.0192755	0.351858
chr8	104033291	104085279	+	ENSG00000155097	-0.311625	7.23438	0.0194294	0.353503
chr2	128994290	129076151	-	ENSG00000136720	0.301639	6.70577	0.0195573	0.355192
chr1	235272651	235292251	-	ENSG00000173726	-0.344967	7.59887	0.0196437	0.356121
chr8	120569326	120685693	-	ENSG00000136960	0.345071	8.91398	0.0197242	0.356802
chr11	102980160	103350591	+	ENSG00000187240	0.302602	5.69023	0.0197518	0.356802
chr17	37004118	37010096	-	ENSG00000125691	-0.385651	9.2862	0.019965	0.36001
chr9	470291	746105	+	ENSG00000107104	0.527436	5.92822	0.0200159	0.360285
chr2	223289236	223425667	+	ENSG00000163082	0.315279	6.49403	0.0200514	0.360285
chr16	30064411	30081778	+	ENSG00000149925	-0.48474	9.9398	0.0201381	0.3612
chr17	21026677	21096578	+	ENSG00000109016	-0.357152	4.08659	0.020442	0.363816
chr1	109656301	109749401	+	ENSG00000116299	0.310947	9.69285	0.0204637	0.363816
chr7	94023873	94060544	+	ENSG00000164692	1.84037	8.77296	0.0204108	0.363816
chr14	70833571	70839810	+	ENSG00000258889	-0.442211	2.31908	0.0203438	0.363816
chr19	20236186	20432114	-	ENSG00000267383	0.393145	2.94622	0.0203686	0.363816
chr3	115528641	117716095	-	ENSG00000185565	0.76885	4.6886	0.0207286	0.367877
chr9	139567595	139581875	-	ENSG00000169692	-0.357696	5.71227	0.0208418	0.369239
chr1	159887897	159895522	-	ENSG00000158710	-0.34461	9.02922	0.0209355	0.370252
chr6	31825436	31830683	-	ENSG00000204386	-0.476865	7.84492	0.0210453	0.371544
chr1	955503	991496	+	ENSG00000188157	0.298392	6.70829	0.0210872	0.371635
chr14	56955072	57117324	+	ENSG00000070269	0.406603	5.74466	0.021231	0.37287
chr9	99794940	99801925	-	ENSG00000136943	-1.04189	3.62287	0.0212147	0.37287
chr10	99496878	99520663	+	ENSG00000155256	0.294191	5.98021	0.0212847	0.373165
chr12	32259769	32536567	+	ENSG00000151746	0.386333	4.95997	0.021373	0.373419
chr19	10426888	10444316	-	ENSG00000161847	0.317645	4.95189	0.021363	0.373419
chr19	4838353	4867780	-	ENSG00000105355	0.374596	5.57648	0.0214693	0.374455
chr19	17462257	17488159	-	ENSG00000130300	-0.868353	6.67133	0.021541	0.374966
chr4	170015407	170192256	-	ENSG00000154447	0.385118	5.83357	0.0215728	0.374966
chr9	104161155	104172942	+	ENSG00000136870	0.310384	6.1364	0.0216588	0.375815
chr11	117049449	117068160	+	ENSG00000149577	0.337593	5.63948	0.021706	0.37599
chr5	176730775	176733960	+	ENSG00000169230	-0.276705	6.53956	0.0218821	0.378392
chr17	70319264	70636611	-	ENSG00000227036	-0.280297	5.60246	0.0220645	0.380895
chr12	121406416	121418768	-	ENSG00000241388	0.582456	2.97861	0.0222536	0.383504
chr8	125500726	125551699	-	ENSG00000147687	-0.34967	4.55011	0.0223069	0.38377
chr1	28261504	28285668	+	ENSG00000130768	0.548315	4.09936	0.0223668	0.384147
chr7	54819943	54827667	-	ENSG00000132432	-0.313854	6.20753	0.0224362	0.384368
chr17	80674559	80688204	+	ENSG00000141560	-0.335058	4.60571	0.0224579	0.384368
chr15	92396925	92715665	+	ENSG00000176463	0.402247	4.62262	0.0225317	0.384368
chr5	1599035	1634120	-	ENSG00000188002	0.495262	3.85815	0.0225174	0.384368
chr2	207024309	207027652	+	ENSG00000114942	-0.308887	8.17993	0.0225891	0.3847
chr10	116190872	116444414	-	ENSG00000099204	0.462284	8.25345	0.0229206	0.388648
chr12	104382762	104457961	-	ENSG00000120820	0.437696	4.29923	0.0229362	0.388648
chr1	115247090	115259515	-	ENSG00000213281	-0.294465	6.36536	0.0229004	0.388648
chr5	137890571	137911133	-	ENSG00000113013	-0.278764	8.7329	0.0230079	0.38871
chr13	114523524	114567046	-	ENSG00000183087	0.402966	4.95214	0.0230167	0.38871
chr9	111899167	111929571	-	ENSG00000136805	0.537917	3.11978	0.0231043	0.389331
chr5	179233388	179265078	+	ENSG00000161011	-0.606481	10.0887	0.0231305	0.389331
chr19	59073298	59084942	-	ENSG00000099326	0.374083	4.92525	0.0232647	0.390939
chr7	141438121	141487722	+	ENSG00000106028	-0.259279	6.18229	0.0233611	0.391434
chr2	24272571	24286551	+	ENSG00000119782	0.388694	3.72992	0.0233715	0.391434
chr1	25568728	25664704	-	ENSG00000117616	0.434985	6.58422	0.0234564	0.392206
chr2	44543420	44589001	-	ENSG00000138078	0.356874	8.28512	0.023528	0.392625
chr9	94972489	95056038	-	ENSG00000196305	-0.334239	7.90989	0.023559	0.392625
chr3	113547029	113666021	+	ENSG00000178075	0.336912	4.36729	0.0238823	0.397358
chr7	73497263	73536855	+	ENSG00000106683	0.305604	4.72484	0.0239651	0.397428
chr14	105452112	105476819	+	ENSG00000140104	0.368455	3.94582	0.0239496	0.397428
chr9	35812957	35815351	-	ENSG00000137133	-0.436502	4.83378	0.0240882	0.398163
chr6	31895475	31919861	+	ENSG00000243649	0.640012	8.35478	0.0240691	0.398163
chr4	77172886	77232752	+	ENSG00000118804	-0.374475	5.00609	0.0243012	0.400245
chr15	35043233	35047166	-	ENSG00000159248	-0.348354	5.92104	0.0243328	0.400245
chr7	74807499	74867509	-	ENSG00000198750	0.402274	2.79419	0.0242711	0.400245
chr9	21967751	21995300	-	ENSG00000147889	0.522947	2.95983	0.024444	0.400771
chr14	100757448	100772884	-	ENSG00000197119	0.333673	6.35911	0.0244433	0.400771
chr22	39915700	39918691	+	ENSG00000128272	-0.528805	8.53029	0.0246757	0.402191
chr1	154179196	154193104	-	ENSG00000143612	-0.275383	7.94742	0.0246892	0.402191
chr17	72199721	72206794	+	ENSG00000172809	-0.324653	8.01038	0.0246897	0.402191
chr2	197699908	197792520	-	ENSG00000197121	0.3725	5.54127	0.0246501	0.402191
chr12	57106212	57125412	-	ENSG00000196531	-0.328653	8.82366	0.0248056	0.40343
chr2	120302008	120419827	+	ENSG00000163075	0.404523	3.52174	0.0248867	0.404099
chr3	145787227	145881440	-	ENSG00000152952	-0.420955	8.71234	0.0250338	0.405837
chr13	28874489	29069265	-	ENSG00000102755	-0.855016	5.91872	0.0252918	0.408709
chr11	121899063	121987031	-	ENSG00000255248	0.335637	4.63375	0.0252841	0.408709
chr20	40030741	40247133	-	ENSG00000124177	0.260688	7.12816	0.0254587	0.409284
chr15	48623208	48635570	+	ENSG00000128951	0.317896	5.43981	0.0255297	0.409284
chr15	74466012	74469213	+	ENSG00000129009	1.79133	3.6502	0.025471	0.409284
chr8	125551344	125580751	+	ENSG00000147684	-0.361613	6.59105	0.0254183	0.409284
chr5	170814120	170838141	+	ENSG00000181163	-0.282284	9.19759	0.0255067	0.409284
chr14	95027779	95059457	+	ENSG00000188488	0.460415	6.92712	0.0256312	0.409613
chr17	7143746	7147954	-	ENSG00000262526	-0.317394	4.29163	0.0256155	0.409613
chr19	42829761	42882921	+	ENSG00000105429	0.282873	6.08598	0.0257722	0.411217
chr7	73645829	73668774	-	ENSG00000049541	-0.338422	3.90284	0.0258968	0.411906
chr15	51973550	52013223	+	ENSG00000104112	0.318839	9.67126	0.0258754	0.411906
chr11	43902361	43941816	+	ENSG00000166199	-0.318946	4.3771	0.0260402	0.413429
chr6	32916390	32938493	-	ENSG00000204257	0.638779	2.97533	0.0260865	0.413429
chr1	168025139	168025660	-	ENSG00000224837	-0.559709	2.39803	0.0261152	0.413429
chr5	140894583	140998622	-	ENSG00000131504	-0.24902	7.47285	0.0261617	0.413519
chr5	76506274	76725632	+	ENSG00000113231	0.346655	6.21912	0.0264065	0.416088
chr2	26915619	26956288	+	ENSG00000171303	-0.255776	7.50799	0.0263829	0.416088
chr1	185265520	185286461	-	ENSG00000116679	0.367121	7.4194	0.0265912	0.416403
chr3	15642848	15687329	+	ENSG00000169814	0.284926	5.07098	0.0265095	0.416403
chr1	145139025	145139569	-	ENSG00000177144	0.390322	3.24267	0.026551	0.416403
chr6	33172419	33174608	+	ENSG00000204228	-0.470423	3.52227	0.0265549	0.416403
chr14	24759804	24769039	-	ENSG00000157379	0.343522	3.68098	0.0266547	0.416753
chr22	40766595	40806122	+	ENSG00000100359	0.288433	6.24403	0.0267656	0.417197
chr11	71796941	71814433	-	ENSG00000149357	-0.310421	6.61925	0.0267354	0.417197
chr9	33441152	33447609	-	ENSG00000165272	-1.20371	6.5792	0.0268672	0.417842
chr9	139615818	139622636	-	ENSG00000233016	-0.421527	4.66008	0.0268896	0.417842
chr19	14625582	14640582	-	ENSG00000132002	-0.342729	7.61093	0.026961	0.41831
chr3	87276421	87304698	+	ENSG00000083937	-0.268899	6.28821	0.0270297	0.418571
chr20	31946645	31989367	-	ENSG00000101391	-0.300812	4.95623	0.0271301	0.418571
chr12	6937204	6949018	+	ENSG00000110811	0.437496	6.13149	0.0271257	0.418571
chr13	46700061	46786006	-	ENSG00000136167	-0.541632	4.56095	0.0271434	0.418571
chr3	171318195	171528740	-	ENSG00000075651	0.370241	5.28743	0.0277219	0.422744
chr9	100819021	100845357	+	ENSG00000095380	-0.383893	4.96918	0.0275737	0.422744
chr16	81115566	81130008	-	ENSG00000140905	-0.300843	4.24405	0.0277901	0.422744
chr3	119316689	119348658	+	ENSG00000144837	-1.03827	3.1571	0.0277122	0.422744
chr20	44802372	44937137	-	ENSG00000149654	0.653354	5.62589	0.027756	0.422744
chr3	53190025	53226733	+	ENSG00000163932	-0.31313	5.62547	0.0276116	0.422744
chr3	115342171	115440337	+	ENSG00000172020	0.943836	3.36031	0.0275838	0.422744
chr2	131447706	131476404	+	ENSG00000240253	0.427174	3.34109	0.027729	0.422744
chr3	42850938	43097363	+	ENSG00000240747	-0.632383	1.79456	0.0274818	0.422744
chr20	8112824	8949003	+	ENSG00000182621	-0.355354	4.71657	0.0278679	0.423291
chr19	50310126	50320633	-	ENSG00000010361	0.381255	3.44012	0.0281446	0.423522
chr19	1040102	1065571	+	ENSG00000064687	0.311946	5.33495	0.0284682	0.423522
chr19	12757325	12777556	-	ENSG00000104774	0.284501	6.00807	0.0284692	0.423522
chr6	133135580	133138703	+	ENSG00000112306	-0.324721	9.19045	0.0284582	0.423522
chr17	8377523	8534079	-	ENSG00000133026	0.357582	7.69647	0.028297	0.423522
chr10	79793518	79816570	+	ENSG00000138326	-0.337999	9.59957	0.0281939	0.423522
chr9	130911350	130915734	+	ENSG00000148346	0.612487	7.75342	0.0283771	0.423522
chr7	64438360	64467062	-	ENSG00000152926	0.57471	4.75066	0.0281585	0.423522
chr7	44617493	44621886	-	ENSG00000158604	0.25799	7.44921	0.0279873	0.423522
chr14	75745477	75748933	+	ENSG00000170345	-0.468808	5.66044	0.0279515	0.423522
chr12	9220260	9268825	-	ENSG00000175899	0.734689	5.67815	0.0283211	0.423522
chr1	118148556	118170994	+	ENSG00000183508	0.301988	7.15165	0.0280334	0.423522
chr20	62258580	62260177	+	ENSG00000232442	0.465201	2.07569	0.0284498	0.423522
chr4	156655600	156658214	+	ENSG00000260244	0.382112	4.33215	0.0284665	0.423522
chr2	203745323	203879521	-	ENSG00000138442	-0.290372	4.84014	0.0287159	0.426408
chr2	3622795	3628509	+	ENSG00000171863	-0.308127	9.17247	0.0287476	0.426408
chr19	33071974	33078358	+	ENSG00000105185	-0.26774	5.71541	0.0288474	0.427072
chr10	76969912	76991206	+	ENSG00000165637	-0.310938	7.47846	0.0288767	0.427072
chr18	3066805	3220106	-	ENSG00000101605	0.482891	5.0114	0.0293263	0.427166
chr10	105348285	105615301	-	ENSG00000107957	0.379642	7.0849	0.0291905	0.427166
chr4	141541919	141677274	-	ENSG00000109436	0.256219	6.88999	0.0293567	0.427166
chr11	5710919	5758319	+	ENSG00000132274	0.67112	4.34171	0.0291617	0.427166
chr13	30083547	30169825	-	ENSG00000139514	-0.31331	7.38789	0.0291688	0.427166
chr2	169690642	169769881	-	ENSG00000152253	0.392425	4.46196	0.0293618	0.427166
chr3	197236654	197300194	-	ENSG00000161267	-0.437466	3.68074	0.0290167	0.427166
chr16	19868616	19897489	-	ENSG00000167191	-0.299948	6.37762	0.0293899	0.427166
chr11	66278077	66301098	+	ENSG00000174483	0.298957	5.3079	0.0290764	0.427166
chr19	8454865	8469318	+	ENSG00000185236	0.242269	6.11304	0.0290603	0.427166
chr1	164524821	164868533	+	ENSG00000185630	0.283839	6.45009	0.0292277	0.427166
chr11	2150351	2151194	-	ENSG00000240801	-1.0856	1.83089	0.0293094	0.427166
chr5	65892176	66465423	+	ENSG00000069020	0.311963	6.76527	0.0295087	0.428278
chr1	15764935	15775737	+	ENSG00000162438	-0.722257	5.72403	0.0298209	0.43219
chr14	50043390	50065408	-	ENSG00000213741	-0.331715	7.79231	0.0299776	0.433839
chr8	20054878	20084330	+	ENSG00000147416	-0.270678	8.24079	0.0300211	0.433848
chr5	95726119	95769847	-	ENSG00000175426	-0.459877	9.88477	0.0300721	0.433966
chr5	57749809	57756087	-	ENSG00000145632	0.512931	7.82773	0.0301587	0.434594
chr14	78174414	78227447	+	ENSG00000119705	-0.323691	5.40254	0.0302362	0.434843
chr10	38091751	38147034	-	ENSG00000198105	0.317811	5.20237	0.0302619	0.434843
chr3	172223298	172241297	-	ENSG00000121858	0.673377	6.06546	0.0304955	0.435918
chr6	10747973	10930656	+	ENSG00000137210	-0.349579	5.8015	0.0304956	0.435918
chr12	99007183	99038891	-	ENSG00000166130	0.462069	4.41001	0.0305522	0.435918
chr17	77071021	77084681	+	ENSG00000167280	0.440714	4.19955	0.0304498	0.435918
chr13	108859794	108870716	-	ENSG00000174405	0.283549	5.92479	0.0305389	0.435918
chr1	201103900	201140702	-	ENSG00000116857	0.329182	6.74424	0.0306981	0.437383
chr10	92631473	92668312	+	ENSG00000148688	-0.2673	4.61165	0.0309613	0.440271
chr12	6982553	6993905	+	ENSG00000240370	-0.545542	2.87348	0.0309879	0.440271
chr22	40742507	40764823	+	ENSG00000239900	-0.266385	5.6027	0.0311086	0.441367
chr_GL000195.1	43717	74342	-	ENSG00000215781	1.22393	5.86413	0.0311609	0.44149
chr11	3360491	3400448	-	ENSG00000005801	-0.268643	5.15174	0.0314589	0.443847
chr8	27454434	27472548	-	ENSG00000120885	0.357642	10.861	0.0314386	0.443847
chr11	1968508	2005752	+	ENSG00000214026	-0.408147	4.84381	0.031442	0.443847
chr4	980785	998316	+	ENSG00000127415	0.504969	2.95778	0.031569	0.444779
chr11	116648436	116658766	-	ENSG00000109917	-0.279504	5.23492	0.0317816	0.446531
chr7	30410987	30412357	+	ENSG00000235859	-0.423664	2.5535	0.0317811	0.446531
chr9	104182860	104198105	-	ENSG00000136872	1.31217	6.55341	0.0319661	0.4467
chr8	19261672	19615540	-	ENSG00000147408	0.843698	4.72011	0.0319265	0.4467
chr4	87515468	87736324	+	ENSG00000163629	0.32388	6.1715	0.0319802	0.4467
chr12	51632076	51640501	+	ENSG00000183283	-0.233525	7.64329	0.0320143	0.4467
chr4	120375946	120473180	+	ENSG00000245958	0.405543	4.41932	0.0318857	0.4467
chr11	94898704	94965705	-	ENSG00000149212	0.546198	6.49848	0.0321832	0.448437
chr14	20914570	20923264	-	ENSG00000092094	-0.321183	5.46006	0.0323272	0.449609
chr10	105881816	105886143	+	ENSG00000156384	-0.424205	2.98404	0.0323562	0.449609
chr14	77253588	77292589	-	ENSG00000013523	0.247372	6.47909	0.0325408	0.450577
chr12	59265931	59314303	-	ENSG00000139263	0.28125	5.36458	0.0325209	0.450577
chr12	49159975	49182820	-	ENSG00000174233	0.250897	6.15321	0.0325595	0.450577
chr3	158449987	158547508	+	ENSG00000118855	-0.304211	6.5485	0.0326564	0.451301
chr3	48725436	48777786	-	ENSG00000068745	0.227472	6.42675	0.0327479	0.451332
chr3	33537737	33759848	-	ENSG00000163539	0.263181	6.97942	0.0327211	0.451332
chr17	36046434	36105237	-	ENSG00000108753	0.40828	5.01248	0.0328149	0.45164
chr20	60711791	60718496	-	ENSG00000101182	-0.255445	6.89282	0.0330455	0.453646
chr19	41807492	41859816	-	ENSG00000105329	0.440626	5.91176	0.0330503	0.453646
chr3	49460379	49466759	-	ENSG00000145029	0.364402	4.26987	0.0331516	0.45442
chr1	21069154	21113816	-	ENSG00000127483	0.271719	7.98851	0.0332285	0.454858
chr22	41697526	41756151	+	ENSG00000100403	0.227656	7.11784	0.0333729	0.455746
chr4	57896939	57976551	-	ENSG00000163453	0.463145	7.18084	0.0334286	0.455746
chr3	52279841	52284613	+	ENSG00000164088	0.424594	3.36987	0.0334058	0.455746
chr19	38397868	38699012	+	ENSG00000105738	0.29099	7.18642	0.0336537	0.457283
chr7	66767608	66786513	+	ENSG00000106610	0.362327	3.48841	0.0336892	0.457283
chr6	99817276	99842080	-	ENSG00000132423	-0.402208	3.15136	0.0337222	0.457283
chr1	244998624	245008359	+	ENSG00000203667	-0.238731	6.00122	0.0337135	0.457283
chr6	152442819	152958936	-	ENSG00000131018	0.269156	6.88772	0.0338934	0.45899
chr16	67182008	67185117	-	ENSG00000237172	0.281463	5.3911	0.0340418	0.460383
chr16	56965960	56977798	+	ENSG00000051108	-0.361395	7.40841	0.0345255	0.461636
chr7	97481430	97501854	-	ENSG00000070669	-0.58829	7.3753	0.0342409	0.461636
chr3	10004221	10052800	-	ENSG00000125037	-0.240195	6.09149	0.0344848	0.461636
chr15	28356186	28567298	-	ENSG00000128731	0.285497	7.60772	0.0345312	0.461636
chr9	137533620	137736686	+	ENSG00000130635	1.64023	6.66095	0.0344529	0.461636
chr12	92536286	92539673	-	ENSG00000133639	0.298256	7.53019	0.0343268	0.461636
chr17	48939584	48945339	-	ENSG00000141232	0.344183	5.56931	0.0345147	0.461636
chr2	85822848	85824736	+	ENSG00000168894	-0.326997	5.10067	0.0346364	0.461636
chr3	44903361	44907162	+	ENSG00000169964	0.273114	4.56316	0.0345632	0.461636
chr17	30178883	30186356	-	ENSG00000172301	-0.28261	5.36759	0.0344666	0.461636
chr2	40339286	40838193	-	ENSG00000183023	0.4533	5.06947	0.0345998	0.461636
chr4	57333081	57369839	+	ENSG00000174780	-0.275883	7.14937	0.0349626	0.463269
chr2	85198216	85282560	+	ENSG00000176407	-0.235305	6.03864	0.0349924	0.463269
chr17	74668633	74707098	-	ENSG00000182534	0.284492	9.12113	0.0349906	0.463269
chr16	78133310	79246564	+	ENSG00000186153	0.362602	3.63923	0.0349108	0.463269
chr8	145674965	145691060	-	ENSG00000187954	0.276052	5.45116	0.0349882	0.463269
chr19	1905213	1926016	+	ENSG00000227500	0.287612	5.79773	0.0350337	0.463269
chr12	46581584	46663800	-	ENSG00000111371	-0.308081	4.99345	0.0351867	0.464684
chr1	5922871	6052533	-	ENSG00000131697	0.321047	4.71003	0.0352697	0.465174
chr19	18111941	18124911	+	ENSG00000105643	0.284183	5.2281	0.0354597	0.466644
chr13	47345391	47371367	-	ENSG00000139684	-0.231293	6.93554	0.0354735	0.466644
chr12	109554400	109706031	+	ENSG00000076555	0.250082	6.35916	0.0357336	0.467634
chr10	45454855	45490172	+	ENSG00000107551	0.291644	5.84809	0.0357295	0.467634
chr1	211556145	211605878	+	ENSG00000153363	-0.352446	3.25469	0.0356889	0.467634
chr14	24407940	24458048	-	ENSG00000215256	0.325017	5.23644	0.0356711	0.467634
chr9	139607022	139618502	+	ENSG00000165716	-0.300979	4.14396	0.036022	0.4708
chr11	118886422	118889401	-	ENSG00000118181	-0.307747	9.09591	0.0361106	0.471349
chr2	204192942	204301606	+	ENSG00000138443	0.256994	6.85752	0.0362219	0.47185
chr1	206744620	206785904	-	ENSG00000143486	0.282679	5.52755	0.0362423	0.47185
chr8	42752075	42883255	+	ENSG00000168172	0.32645	5.36627	0.0363031	0.472033
chr17	48260650	48278993	-	ENSG00000108821	1.75259	9.09145	0.036426	0.472406
chr4	69794181	69817509	-	ENSG00000135220	0.534697	4.636	0.0364204	0.472406
chr4	2229191	2243891	-	ENSG00000214367	-0.277874	4.48708	0.0364718	0.472406
chr18	47014851	47018893	-	ENSG00000265681	-0.331534	9.51284	0.0365343	0.47261
chr5	131527531	131631008	-	ENSG00000072682	0.267536	7.13792	0.036604	0.472907
chr10	85899196	85913001	+	ENSG00000165678	-0.303713	8.31011	0.0367302	0.473932
chr17	79476997	79490873	-	ENSG00000184009	-0.311413	10.8243	0.0368829	0.474691
chr11	565660	568457	-	ENSG00000247095	-0.892099	4.32407	0.036872	0.474691
chr7	100136834	100165842	+	ENSG00000106351	0.281336	5.34113	0.0370928	0.476588
chr7	47314752	47622156	-	ENSG00000136205	-0.296858	7.38543	0.0371245	0.476588
chr3	9849770	9896822	+	ENSG00000214021	0.351372	5.30714	0.0372682	0.477827
chr10	105642300	105677963	-	ENSG00000107960	-0.279994	4.65097	0.0373582	0.478243
chr1	26560691	26605299	+	ENSG00000130695	-0.30028	5.14609	0.0374425	0.478243
chr16	89747145	89762772	+	ENSG00000185324	0.305215	5.9702	0.037424	0.478243
chr4	78783674	78873944	+	ENSG00000169288	-0.281733	5.15274	0.0375758	0.478737
chr10	46222648	46288409	+	ENSG00000172661	-0.36488	6.43121	0.0375533	0.478737
chr19	44235301	44259142	-	ENSG00000105771	0.294102	4.8258	0.0376836	0.479199
chr5	33440802	33469644	+	ENSG00000113407	-0.323473	7.78242	0.0377069	0.479199
chr13	37523912	37574398	-	ENSG00000120697	-0.308412	5.35765	0.0377558	0.479219
chr19	18794487	18893004	+	ENSG00000105662	0.305695	4.46899	0.0378136	0.479351
chr11	72547790	72853306	-	ENSG00000137478	0.347367	4.72412	0.0379795	0.480851
chr1	84543745	84704181	+	ENSG00000142875	0.304647	7.19034	0.0380618	0.481291
chr1	218458629	218511325	+	ENSG00000067533	-0.281869	4.77276	0.0382511	0.483081
chr17	49230897	49239789	+	ENSG00000239672	-0.291421	5.73109	0.0383896	0.484226
chr10	112836790	112840658	+	ENSG00000150594	0.404011	4.54116	0.0384485	0.484365
chr16	19179293	19279652	+	ENSG00000103528	0.29069	5.27853	0.0386265	0.485399
chr2	60983365	61029220	+	ENSG00000115421	0.286849	4.98487	0.0385961	0.485399
chr21	47518011	47552763	+	ENSG00000142173	1.03014	7.14555	0.0388175	0.486589
chr7	19958604	20180076	-	ENSG00000243004	0.511808	2.05935	0.038786	0.486589
chr19	50194155	50216988	+	ENSG00000169169	0.329544	3.72615	0.0388837	0.486817
chr20	33866714	33872788	-	ENSG00000242372	-0.274407	6.30345	0.0389501	0.487045
chr9	36190853	36304778	+	ENSG00000122705	-0.268039	7.06615	0.0390879	0.488164
chr15	101402129	101456831	+	ENSG00000184254	0.539179	6.57522	0.0393367	0.490666
chr17	60704762	60770958	+	ENSG00000011028	1.22319	5.15268	0.0396692	0.493081
chr2	162280843	162841792	+	ENSG00000144290	0.328626	6.55657	0.0396482	0.493081
chr21	15743436	15755805	-	ENSG00000155304	-0.314112	7.11855	0.0396765	0.493081
chr22	18074902	18111584	-	ENSG00000131100	-0.304915	7.84957	0.039819	0.493134
chr12	105567074	105630016	-	ENSG00000136044	0.236262	6.27072	0.0397327	0.493134
chr8	117962512	118188953	+	ENSG00000164756	0.400392	10.836	0.0398271	0.493134
chr6	32407619	32412823	+	ENSG00000204287	1.02533	4.62533	0.0399259	0.493754
chr22	42556019	42739622	-	ENSG00000100207	0.230226	6.49036	0.0401353	0.495737
chr10	101088856	101154087	+	ENSG00000119946	0.265103	5.03477	0.0402259	0.49625
chr6	117996665	118031803	+	ENSG00000153989	-0.23537	6.68713	0.0404745	0.498709
chr17	8280838	8286531	-	ENSG00000161970	-0.321892	9.40732	0.0406834	0.500568
chr16	56703726	56705041	+	ENSG00000205358	0.652585	2.72791	0.0407738	0.500568
chr2	175584505	175585526	+	ENSG00000235655	0.412344	7.48084	0.0407388	0.500568
chr14	74523553	74551196	-	ENSG00000119711	0.259828	4.97176	0.0409043	0.500954
chr19	5784843	5791236	-	ENSG00000141994	-0.42738	3.46827	0.0409041	0.500954
chr7	73150424	73153197	-	ENSG00000106077	-0.390237	4.55976	0.0409834	0.501316
chr2	101008327	101034118	-	ENSG00000115526	0.313422	3.9943	0.0415643	0.50375
chr17	73841780	73852588	-	ENSG00000132471	-0.34949	7.13152	0.0412403	0.50375
chr8	33448856	33457624	-	ENSG00000133878	0.251299	5.81077	0.0416684	0.50375
chr8	71021997	71316040	-	ENSG00000140396	0.280316	6.42	0.0416804	0.50375
chr10	105995114	106027217	+	ENSG00000148834	-0.236824	6.58798	0.041658	0.50375
chr3	99548985	99833357	-	ENSG00000168386	0.501069	5.81794	0.0414624	0.50375
chr17	9153789	9479908	-	ENSG00000170310	-0.294547	5.04952	0.0415664	0.50375
chr11	85359011	85367591	+	ENSG00000171202	-0.294608	4.57331	0.041448	0.50375
chr22	37600278	37608362	-	ENSG00000183473	0.336259	6.25522	0.041412	0.50375
chr6	34214157	34217247	-	ENSG00000186577	-0.45383	5.24242	0.0416713	0.50375
chr2	85581517	85618875	+	ENSG00000115459	0.271287	4.55965	0.0423881	0.505658
chr7	2671585	2704436	+	ENSG00000136295	0.364152	4.74376	0.0421572	0.505658
chr12	56556767	56583351	-	ENSG00000139613	0.291077	6.87266	0.0422655	0.505658
chr1	235824341	236046940	-	ENSG00000143669	0.23414	6.4456	0.0419183	0.505658
chr2	210636717	210864024	+	ENSG00000144406	0.27733	7.39703	0.0423626	0.505658
chr3	4535032	4889524	+	ENSG00000150995	0.363946	6.05675	0.0422325	0.505658
chr6	26158349	26171577	+	ENSG00000158373	0.575663	3.54494	0.0422942	0.505658
chr1	65613232	65697828	+	ENSG00000162433	-0.593695	5.30509	0.0421168	0.505658
chr1	228674762	228683467	+	ENSG00000168159	-0.706672	7.36133	0.0420381	0.505658
chr1	50905150	51425935	-	ENSG00000185104	-0.240822	5.75963	0.0421179	0.505658
chr2	30454397	30546596	+	ENSG00000213626	0.378157	5.93283	0.0419423	0.505658
chr1	24104895	24114722	+	ENSG00000057757	-0.321868	5.95516	0.0425625	0.505739
chr14	103243813	103377837	+	ENSG00000131323	0.272098	5.57653	0.0424852	0.505739
chr1	220141943	220220000	-	ENSG00000136628	-0.261922	8.12879	0.0425948	0.505739
chr17	7788124	7816078	+	ENSG00000170004	0.29477	8.16337	0.0425188	0.505739
chr3	12875984	12883087	-	ENSG00000144713	-0.348263	9.18756	0.0428211	0.50783
chr14	77228532	77249354	+	ENSG00000071246	0.430588	5.54749	0.043455	0.510559
chr11	113603909	113644533	-	ENSG00000086827	-0.26646	4.6139	0.0434317	0.510559
chr7	134832824	134850650	+	ENSG00000146859	0.29657	4.18855	0.0433267	0.510559
chr16	29984962	30003582	+	ENSG00000149930	0.220384	6.17929	0.0434162	0.510559
chr1	16062900	16067891	+	ENSG00000162461	0.485003	5.34018	0.0434425	0.510559
chr8	22022249	22069839	+	ENSG00000168487	0.814454	5.20569	0.043292	0.510559
chr1	207494853	207534311	+	ENSG00000196352	-0.30587	6.72563	0.0432187	0.510559
chr7	143969538	143991256	-	ENSG00000204959	0.427022	4.7486	0.043337	0.510559
chr2	131278770	131285579	+	ENSG00000152093	0.299651	5.54562	0.0435967	0.511321
chr1	203765437	203769686	+	ENSG00000257315	0.462461	5.52739	0.043621	0.511321
chr1	145438469	145442635	+	ENSG00000117289	0.404431	6.99723	0.0437355	0.51172
chr5	95865525	96115299	+	ENSG00000153113	-0.242095	7.8035	0.0437562	0.51172
chr16	74907468	75034071	-	ENSG00000103091	0.233201	6.11745	0.0438316	0.512009
chr5	79703832	79775169	+	ENSG00000039319	0.36146	6.12736	0.0439866	0.5127
chr17	28705923	28797007	+	ENSG00000108582	-0.258743	8.56478	0.0440934	0.5127
chr1	2487078	2497061	+	ENSG00000157873	-0.588379	5.36031	0.0440786	0.5127
chr16	15198178	15225458	-	ENSG00000188599	-0.265144	4.43683	0.0439965	0.5127
chr11	85339629	85347580	+	ENSG00000171204	-0.267	5.70594	0.0441602	0.512887
chr19	50010073	50029590	+	ENSG00000104870	0.466779	5.43464	0.0445076	0.516329
chr12	71518865	71835678	-	ENSG00000127324	0.378461	6.38817	0.0448219	0.51938
chr11	101785746	101871789	+	ENSG00000110318	0.322231	6.16115	0.0451036	0.522046
chr6	34204577	34214008	+	ENSG00000137309	-0.341417	6.19627	0.0452373	0.522685
chr12	113658855	113736390	+	ENSG00000186815	0.267085	6.10266	0.0452622	0.522685
chr4	185308867	185395734	-	ENSG00000168310	0.308627	4.69992	0.0453306	0.522878
chr6	12008995	12165232	+	ENSG00000095951	0.31704	5.50001	0.0456965	0.524259
chr16	74330673	74340186	+	ENSG00000103035	-0.235906	6.69576	0.0458006	0.524259
chr11	82534544	82681626	-	ENSG00000137509	0.254025	6.46611	0.045767	0.524259
chr17	37894180	37903544	+	ENSG00000141738	0.28629	3.9521	0.0456094	0.524259
chr14	20925878	20929771	-	ENSG00000165782	-0.243798	5.64081	0.0455141	0.524259
chr13	35516424	36247159	+	ENSG00000172915	0.281803	7.23482	0.0458131	0.524259
chr19	50372295	50381716	-	ENSG00000204673	0.289134	5.39565	0.0456109	0.524259
chr4	106815932	106925184	+	ENSG00000168743	0.701279	7.35648	0.0459876	0.525248
chr11	28129795	28355054	+	ENSG00000169519	0.282172	4.96322	0.0460033	0.525248
chr1	6265535	6281359	+	ENSG00000158286	0.432517	3.8121	0.0460723	0.525442
chr1	110527308	110566357	+	ENSG00000168710	0.236421	8.42971	0.0461466	0.525697
chr7	22980878	23053749	-	ENSG00000122591	0.402862	4.74065	0.0463039	0.526747
chr15	75628232	75634268	+	ENSG00000140365	-0.340047	5.0953	0.046447	0.526747
chr18	24495595	24765281	-	ENSG00000154080	0.332496	5.97366	0.0464327	0.526747
chr1	145209119	145291954	+	ENSG00000213240	0.47832	4.04646	0.0464134	0.526747
chr3	40498783	40503861	+	ENSG00000188846	-0.288057	9.12341	0.0466363	0.528301
chr22	21213271	21245502	+	ENSG00000099940	-0.257489	5.45861	0.0467222	0.528682
chr5	82767284	82878122	+	ENSG00000038427	1.7779	5.59968	0.0470734	0.529125
chr6	33588522	33664351	+	ENSG00000096433	-0.368035	8.69968	0.0469897	0.529125
chr9	101569981	101612363	+	ENSG00000119514	-0.273248	4.38674	0.0471193	0.529125
chr13	37572953	37583750	+	ENSG00000120699	-0.251767	5.0497	0.0470283	0.529125
chr22	36622256	36636000	-	ENSG00000128335	-0.231769	5.86142	0.0469426	0.529125
chr2	220059959	220074373	+	ENSG00000158552	-0.293902	5.139	0.0471275	0.529125
chr1	44457172	44497139	-	ENSG00000196517	-0.476552	4.12761	0.0471264	0.529125
chr1	25870071	25895377	+	ENSG00000157978	0.268662	6.9639	0.0472356	0.529751
chr4	16503164	16900432	-	ENSG00000169744	0.721757	3.77669	0.0473426	0.530363
chr8	55047770	55060461	+	ENSG00000137547	-0.28143	5.19629	0.0475769	0.532398
chr19	36605191	36616849	+	ENSG00000105254	-0.225973	5.90703	0.0481497	0.537026
chr2	175664091	175870097	-	ENSG00000128656	0.302731	5.50631	0.0481155	0.537026
chr10	91152303	91163745	+	ENSG00000185745	-0.421156	4.89326	0.0481099	0.537026
chr14	64319683	64693165	+	ENSG00000054654	0.398359	8.53316	0.0482753	0.537242
chr17	38249040	38256978	-	ENSG00000126368	-0.647848	5.20267	0.0482365	0.537242
chr15	83205504	83209315	-	ENSG00000182774	-0.333605	8.8888	0.0483373	0.537341
chr10	126436721	126480446	-	ENSG00000203791	-0.394109	4.06374	0.0484399	0.537602
chr14	58732083	58764852	-	ENSG00000257621	0.25277	6.16099	0.0484671	0.537602
chr5	178029665	178057616	-	ENSG00000113240	0.347131	5.06379	0.0485492	0.537923
chr11	76777979	76837201	+	ENSG00000149260	0.448791	4.69228	0.048668	0.538649
chr7	116312248	116438440	+	ENSG00000105976	-0.268965	6.0553	0.0487371	0.538825
chr3	50126341	50156454	+	ENSG00000003756	0.26811	7.52266	0.0488299	0.539262
chr8	120177273	120257913	+	ENSG00000147676	-0.264041	7.47082	0.0488889	0.539324
chr17	3714460	3749545	-	ENSG00000074356	0.276999	5.56358	0.0490229	0.540093
chr22	26839389	26879803	-	ENSG00000100099	-0.211913	6.21787	0.0490654	0.540093
chr20	5917881	5931182	-	ENSG00000089195	-0.248085	4.7148	0.0495102	0.540245
chr20	24943561	24973615	-	ENSG00000101474	0.244835	7.29361	0.0495137	0.540245
chr19	40736224	40791443	-	ENSG00000105221	0.252572	6.39611	0.0492195	0.540245
chr12	110890289	110907019	-	ENSG00000111231	-0.297385	4.47147	0.0496666	0.540245
chr20	2815960	2821836	-	ENSG00000132635	0.33173	4.68775	0.0494314	0.540245
chr1	203274619	203278730	+	ENSG00000159388	0.352138	6.26588	0.049473	0.540245
chr4	165997256	166129701	-	ENSG00000170088	-0.26699	5.38736	0.0492484	0.540245
chr6	32546546	32557625	-	ENSG00000196126	0.528233	3.74267	0.0495965	0.540245
chr2	217362912	217443903	+	ENSG00000197756	-0.287657	9.45906	0.049463	0.540245
chr8	93895758	94029901	-	ENSG00000205133	0.251936	6.68913	0.0496021	0.540245
chr9	37079893	37090398	+	ENSG00000233137	0.219002	6.84141	0.049666	0.540245
chr1	205111632	205180727	-	ENSG00000133059	0.244438	6.06469	0.0500277	0.543588
chr3	149530495	149679926	+	ENSG00000082996	-0.219242	6.37647	0.0503441	0.543936
chr5	115779312	115910630	-	ENSG00000092421	-0.41493	6.09075	0.0505703	0.543936
chr20	23608534	23619110	-	ENSG00000101439	0.272156	7.89149	0.0509574	0.543936
chr17	42282401	42298994	-	ENSG00000108312	0.23009	6.76362	0.0507206	0.543936
chr11	3022152	3078843	-	ENSG00000110619	-0.357334	6.51308	0.0504892	0.543936
chr12	22199108	22218608	+	ENSG00000111726	-0.248978	6.12455	0.0509738	0.543936
chr4	57301907	57327534	+	ENSG00000128050	-0.238189	6.89257	0.0508242	0.543936
chr4	79472673	79531597	+	ENSG00000138772	-0.414497	5.98576	0.0503191	0.543936
chr1	24018269	24022915	+	ENSG00000142676	-0.315841	9.52134	0.05019	0.543936
chr3	160473390	160796695	+	ENSG00000163590	0.245914	6.40639	0.0505747	0.543936
chr14	95654735	95786243	-	ENSG00000165959	0.258479	5.51184	0.0504938	0.543936
chr11	66045661	66052772	+	ENSG00000174871	0.471425	5.20247	0.0509052	0.543936
chr8	96146032	96168912	+	ENSG00000175895	-0.248776	5.49078	0.0508505	0.543936
chr15	75931426	75941047	-	ENSG00000177971	-0.271949	5.22028	0.0501787	0.543936
chr18	72907063	72921303	-	ENSG00000180011	0.261932	6.19376	0.0508897	0.543936
chr17	36283971	36294915	+	ENSG00000185128	0.279029	4.16161	0.050329	0.543936
chr6	7881755	8064597	-	ENSG00000259040	0.374368	3.97953	0.0508786	0.543936
chr4	122722472	122738176	+	ENSG00000123737	-0.239875	4.94844	0.0510942	0.544193
chr2	236402733	237035198	+	ENSG00000157985	-0.343996	5.49231	0.0511055	0.544193
chr4	120415550	120550146	-	ENSG00000138735	0.331539	5.76288	0.0514333	0.547108
chr19	19101697	19144832	-	ENSG00000064607	0.252565	6.86851	0.0516338	0.548664
chr13	58205944	58303445	+	ENSG00000118946	0.280341	6.6853	0.0518708	0.549742
chr16	68344877	68392466	+	ENSG00000132600	-0.293285	4.37445	0.0520014	0.549742
chr12	56660642	56664750	+	ENSG00000135469	-0.286481	4.79557	0.0520566	0.549742
chr7	90013035	90142716	+	ENSG00000157224	-0.209496	7.13845	0.0519896	0.549742
chr16	74411156	74425978	+	ENSG00000196436	-2.60521	2.2111	0.0520308	0.549742
chr3	123209667	123304032	-	ENSG00000206527	0.252559	6.0875	0.0520614	0.549742
chr22	50946645	50963063	+	ENSG00000025770	-0.32123	4.76373	0.0522426	0.551081
chr6	151186685	151423023	+	ENSG00000120254	-0.314	4.7463	0.0526245	0.55223
chr2	242014469	242041747	-	ENSG00000122085	-0.39541	5.94918	0.0525917	0.55223
chr5	77296349	77590579	-	ENSG00000132842	0.258863	7.0721	0.0525717	0.55223
chr17	80416056	80446143	+	ENSG00000141562	-0.256573	5.6516	0.0525005	0.55223
chr2	86947296	87005164	+	ENSG00000153561	-0.212022	6.21841	0.0525807	0.55223
chr19	1259384	1274879	+	ENSG00000099622	-0.3065	8.01224	0.0529179	0.553586
chr3	140660672	140698775	+	ENSG00000114120	-0.227776	6.76911	0.0528941	0.553586
chr12	100550135	100567437	-	ENSG00000238105	0.315664	4.45563	0.0529135	0.553586
chr15	60780483	61521518	-	ENSG00000069667	-0.349345	6.25951	0.0538407	0.554072
chr16	56225302	56391356	+	ENSG00000087258	0.247089	7.41851	0.0537179	0.554072
chr6	36164521	36200567	+	ENSG00000096070	0.24552	6.23242	0.0538399	0.554072
chr10	90694831	90751147	-	ENSG00000107796	1.39025	3.74382	0.0530668	0.554072
chr9	4792869	4861064	+	ENSG00000120158	-0.305957	3.77866	0.0538304	0.554072
chr11	130745331	130786404	-	ENSG00000120451	0.269966	7.13344	0.0532271	0.554072
chr14	105235686	105262088	-	ENSG00000142208	-0.222744	7.08325	0.0532604	0.554072
chr3	118619404	118864915	-	ENSG00000144847	0.391405	4.01984	0.0536515	0.554072
chr4	22346694	22517677	-	ENSG00000152990	0.30002	5.62239	0.0536974	0.554072
chr1	75198836	75232362	+	ENSG00000162623	0.248851	5.66432	0.0538353	0.554072
chr1	111729796	111747157	-	ENSG00000162777	0.302537	5.12396	0.0535302	0.554072
chr12	118470712	118500235	-	ENSG00000176871	-0.221811	7.65348	0.053632	0.554072
chr14	28733596	28735180	+	ENSG00000197358	-0.464302	5.34794	0.0532882	0.554072
chr22	50354161	50357728	+	ENSG00000198355	-0.411894	5.67296	0.0536482	0.554072
chr1	184020811	184043346	+	ENSG00000198860	-0.251136	5.103	0.0531789	0.554072
chr17	41102543	41116515	-	ENSG00000266967	-0.339781	2.85581	0.053412	0.554072
chr11	60658202	60674060	-	ENSG00000110107	-0.250369	7.23456	0.0539977	0.554559
chr1	202930997	202936408	-	ENSG00000159348	-0.275912	6.03702	0.0539567	0.554559
chr1	45265897	45271662	+	ENSG00000173846	-0.367876	3.62828	0.054118	0.55523
chr6	142468367	142542085	+	ENSG00000009844	-0.204877	6.10951	0.0543058	0.556205
chr2	101436614	101613291	+	ENSG00000170485	0.256454	5.43213	0.0543229	0.556205
chr3	172348039	172429008	-	ENSG00000144959	-0.393757	5.78052	0.0545981	0.55733
chr9	15170843	15307358	-	ENSG00000155158	-0.310951	4.01419	0.0545659	0.55733
chr17	44594068	44657088	-	ENSG00000185829	0.388147	4.97633	0.0545582	0.55733
chr1	204797779	204991950	+	ENSG00000163531	0.233998	8.27063	0.0548556	0.558655
chr5	52856463	52979168	+	ENSG00000164258	-0.275238	5.55998	0.0549487	0.558655
chr15	64791491	64978264	+	ENSG00000180357	0.230418	6.33354	0.0548072	0.558655
chr1	93727743	93811582	-	ENSG00000223745	0.432545	4.98299	0.0548982	0.558655
chr4	159690290	159829201	+	ENSG00000052795	-0.300232	7.37171	0.0551232	0.559304
chr2	162164549	162268228	+	ENSG00000115233	-0.220692	6.45613	0.0550857	0.559304
chr22	33197687	33259030	+	ENSG00000100234	0.977354	7.8796	0.0554123	0.559705
chr8	52730140	52811735	-	ENSG00000168300	0.270291	6.51546	0.0554393	0.559705
chr17	7308193	7323179	+	ENSG00000169992	0.407302	4.88366	0.0552568	0.559705
chr7	5346421	5465045	-	ENSG00000182095	0.231912	5.69107	0.0552914	0.559705
chr3	52009066	52023213	+	ENSG00000243989	-0.324192	3.7518	0.0553591	0.559705
chr2	114384806	114400973	+	ENSG00000144134	0.378101	3.62726	0.0555065	0.559825
chr12	123728734	123746030	-	ENSG00000235423	0.579091	2.5574	0.0555886	0.560094
chr1	209848765	209849733	+	ENSG00000123689	-0.58467	2.91414	0.0557024	0.56063
chr18	8609443	8639379	+	ENSG00000206418	-0.246227	6.24047	0.0557527	0.56063
chr2	74425689	74444692	+	ENSG00000065911	-0.62159	6.46412	0.0561275	0.561217
chr20	13246709	13619587	-	ENSG00000089123	-0.315965	3.80203	0.056913	0.561217
chr20	35518632	35580246	-	ENSG00000101347	0.362981	4.97981	0.0568743	0.561217
chr16	23568392	23585710	+	ENSG00000103353	0.233933	6.47043	0.0564688	0.561217
chr7	130126046	130146133	+	ENSG00000106484	0.284933	6.04083	0.0559813	0.561217
chr3	101399935	101405626	-	ENSG00000114391	-0.319081	8.83003	0.0563491	0.561217
chr19	35842445	35843367	+	ENSG00000126266	0.525889	4.11137	0.0561239	0.561217
chr19	59062933	59066491	-	ENSG00000130724	-0.265219	6.85881	0.0563381	0.561217
chr12	58191159	58212487	-	ENSG00000135407	0.513654	3.45901	0.0561043	0.561217
chr6	3118608	3153812	+	ENSG00000137274	-0.270674	4.45025	0.0568831	0.561217
chr5	136953189	137071779	-	ENSG00000146021	0.309209	5.2867	0.0568627	0.561217
chr10	91174343	91180758	+	ENSG00000152778	-0.252468	5.44626	0.0569206	0.561217
chr5	179261436	179289173	-	ENSG00000161010	-0.231192	6.63888	0.056167	0.561217
chr1	153963235	153964626	+	ENSG00000177954	-0.305692	9.34857	0.0567506	0.561217
chr3	49027319	49044587	+	ENSG00000178467	0.293828	6.97376	0.0564839	0.561217
chr1	240652873	240775449	-	ENSG00000180875	-1.05887	4.46627	0.0563747	0.561217
chr17	21428051	21477781	-	ENSG00000212719	0.26037	5.0152	0.0567285	0.561217
chr6	32065953	32096030	-	ENSG00000213676	0.239662	6.07532	0.0563779	0.561217
chr6	33239787	33244287	+	ENSG00000231500	-0.351841	9.63012	0.056313	0.561217
chr8	67833919	67838633	-	ENSG00000245910	-0.330188	5.75148	0.0568638	0.561217
chr19	54677107	54693733	-	ENSG00000125505	0.245825	6.11517	0.057111	0.562546
chr6	166778407	166796486	-	ENSG00000060762	-0.423743	5.15186	0.0572036	0.56291
chr8	99202061	99306621	-	ENSG00000104361	0.254583	5.70386	0.0573865	0.563462
chr9	12775020	12822130	+	ENSG00000153714	-0.439203	5.30757	0.0574268	0.563462
chr1	22446461	22470462	-	ENSG00000162552	0.228186	6.59369	0.057357	0.563462
chr22	51063446	51066607	-	ENSG00000100299	0.388688	5.35438	0.057565	0.564271
chr1	206680879	206762616	+	ENSG00000136653	-0.257644	6.35993	0.0576989	0.564997
chr9	37485932	37503694	+	ENSG00000137054	-0.337365	4.09023	0.0577508	0.564997
chr2	20883803	21022882	-	ENSG00000118961	0.367272	4.97934	0.0579141	0.566047
chr16	56700643	56701977	-	ENSG00000125144	0.426197	5.2963	0.0580186	0.566522
chr8	29190581	29208185	-	ENSG00000120875	-0.482211	6.46259	0.0581663	0.567416
chr18	72163051	72188366	+	ENSG00000133313	0.250594	7.31077	0.0582254	0.567446
chr16	12070594	12668146	+	ENSG00000048471	0.247621	6.59312	0.0586979	0.567619
chr9	108006903	108201452	+	ENSG00000070214	0.251917	6.51428	0.0592533	0.567619
chr14	58711549	58738730	+	ENSG00000100567	-0.214767	6.60622	0.0589945	0.567619
chr13	49550048	49783888	+	ENSG00000102531	0.269913	8.44768	0.058715	0.567619
chr12	56810903	56843187	-	ENSG00000111602	-0.261328	5.23122	0.0584441	0.567619
chr15	40697686	40728146	+	ENSG00000128928	0.251901	6.16484	0.0592324	0.567619
chr17	73772515	73781974	-	ENSG00000132475	-0.23207	8.7647	0.0585699	0.567619
chr16	83981887	83999937	+	ENSG00000140961	-0.616474	3.44925	0.0586374	0.567619
chr17	37844167	37886679	+	ENSG00000141736	0.276179	5.65926	0.0591196	0.567619
chr17	39968932	39979465	+	ENSG00000141756	0.881674	4.73057	0.0588426	0.567619
chr3	122078438	122102078	-	ENSG00000160124	-0.292742	3.52579	0.0585114	0.567619
chr21	47720095	47743789	-	ENSG00000160298	0.262804	4.63567	0.0589815	0.567619
chr2	29117509	29171088	+	ENSG00000163811	-0.240276	5.50722	0.0590461	0.567619
chr3	167726465	167813763	-	ENSG00000173905	0.279607	5.7444	0.0584956	0.567619
chr8	86126311	86132650	-	ENSG00000176731	-0.275909	5.07196	0.0591769	0.567619
chr1	203830731	203839678	+	ENSG00000182004	-0.236837	5.73407	0.0588726	0.567619
chr5	131646978	131705608	-	ENSG00000233006	0.297171	3.68643	0.0589975	0.567619
chr1	201969222	201979481	-	ENSG00000234678	-0.469644	2.16557	0.059053	0.567619
chr19	49133287	49140695	-	ENSG00000105516	-0.708798	4.02705	0.0594044	0.568529
chr14	23033805	23058175	-	ENSG00000129562	-0.21683	7.08299	0.0595788	0.569659
chr10	79550549	79686378	-	ENSG00000151208	0.214254	6.54307	0.0596608	0.569904
chr3	112251356	112280893	-	ENSG00000144848	-0.223411	6.03235	0.0597935	0.570633
chr6	125596496	125623282	-	ENSG00000111906	-0.288366	5.11882	0.0599003	0.571113
chr11	10329860	10529126	+	ENSG00000133805	-0.390695	5.10483	0.0601374	0.57122
chr11	117707693	117748201	-	ENSG00000137726	0.738184	6.74007	0.0600638	0.57122
chr5	19473060	20575982	-	ENSG00000145526	0.822534	3.84118	0.0600881	0.57122
chr9	125026882	125085743	+	ENSG00000148187	-0.261195	5.00119	0.0599728	0.57122
chr6	29855350	29858259	+	ENSG00000206341	-1.43276	4.96866	0.0602178	0.571448
chr14	68113792	68141548	-	ENSG00000100568	-0.223488	6.57708	0.0605743	0.571613
chr14	60610838	60636574	-	ENSG00000100612	-0.235969	7.08234	0.0605678	0.571613
chr2	85788685	85809154	+	ENSG00000118640	-0.256753	6.08469	0.0603973	0.571613
chr19	6677715	6730573	-	ENSG00000125730	0.819937	8.46017	0.0605554	0.571613
chr10	98757795	98945677	-	ENSG00000187122	0.846985	5.09727	0.0605003	0.571613
chr3	193310933	193415612	+	ENSG00000198836	-0.21597	6.79302	0.0604975	0.571613
chr20	32399110	32442172	+	ENSG00000101421	-0.223829	7.23749	0.0608981	0.572001
chr16	30125426	30134827	-	ENSG00000102882	-0.249662	5.89046	0.0608015	0.572001
chr8	102698771	103137135	-	ENSG00000104490	0.234194	6.36527	0.0607881	0.572001
chr19	12936292	12946242	-	ENSG00000132026	0.345088	3.1835	0.0608741	0.572001
chr1	150969025	150980851	-	ENSG00000143409	0.274056	5.7985	0.0608852	0.572001
chr13	33677307	33924767	-	ENSG00000133121	0.385904	5.11218	0.061012	0.572321
chr4	169784921	169931426	-	ENSG00000145439	0.244451	5.64735	0.0610453	0.572321
chr22	18216906	18257536	-	ENSG00000015475	0.312366	4.27047	0.0615601	0.572899
chr6	57053581	57087078	-	ENSG00000112210	0.344871	4.56616	0.0614201	0.572899
chr20	34042985	34099804	+	ENSG00000126001	-0.277233	5.58087	0.0613859	0.572899
chr16	18792617	18801705	-	ENSG00000134419	-0.291041	8.77474	0.0614514	0.572899
chr12	49687035	49692465	+	ENSG00000135406	0.436343	4.2074	0.0615188	0.572899
chr13	41701705	41706882	-	ENSG00000165572	0.268494	5.22805	0.0611735	0.572899
chr12	75669759	75784708	-	ENSG00000180881	0.330263	3.09391	0.0613697	0.572899
chr1	51795326	51800996	+	ENSG00000261664	-0.457051	2.3032	0.0613327	0.572899
chr2	55199325	55339757	-	ENSG00000115310	-0.315614	8.84444	0.0619957	0.574312
chr20	17594323	17662940	-	ENSG00000125844	0.225335	7.89898	0.0619934	0.574312
chr18	51679079	51751158	-	ENSG00000134046	-0.223285	5.77698	0.0619882	0.574312
chr15	49619159	49913128	-	ENSG00000166262	-0.375967	2.95694	0.0617777	0.574312
chr2	242576628	242613272	+	ENSG00000168397	0.245235	5.65831	0.0619051	0.574312
chr18	48405419	48474691	+	ENSG00000082212	-0.210076	6.1196	0.0621786	0.574953
chr11	8127597	8190602	-	ENSG00000166405	0.2485	6.03842	0.0621285	0.574953
chr4	6576902	6625089	+	ENSG00000013288	0.296834	6.43755	0.0624225	0.575106
chr6	100832891	100912805	-	ENSG00000112246	0.339395	5.93363	0.0622606	0.575106
chr1	192984889	193029237	-	ENSG00000116750	-0.268069	5.1839	0.0623249	0.575106
chr1	144836157	145076186	-	ENSG00000178104	0.239979	8.70151	0.0623665	0.575106
chr16	14927538	14990017	+	ENSG00000103512	0.418776	8.18573	0.0625433	0.575552
chr22	31556168	31602999	+	ENSG00000138942	-0.217407	6.18965	0.0626416	0.575552
chr2	55459039	55462989	+	ENSG00000143947	-0.266908	9.48701	0.0626046	0.575552
chr19	40953696	40971747	-	ENSG00000090013	-0.48105	5.05639	0.0628721	0.57577
chr12	109038885	109125372	-	ENSG00000110880	-0.228944	6.60537	0.0628643	0.57577
chr2	231729354	231743963	+	ENSG00000135916	0.428161	7.80189	0.062893	0.57577
chr10	94447945	94455403	+	ENSG00000152804	0.313758	4.58584	0.0628782	0.57577
chr6	109307640	109416022	-	ENSG00000080546	0.264368	6.58759	0.0636377	0.576457
chr22	38879445	38903665	-	ENSG00000100201	0.329887	10.0009	0.0636251	0.576457
chr6	99845927	99873207	-	ENSG00000132424	0.327962	7.77904	0.0630257	0.576457
chr11	9685624	9774538	+	ENSG00000133789	-0.26634	5.78227	0.0634413	0.576457
chr15	94774767	95023632	+	ENSG00000140563	-0.267194	5.27903	0.0634719	0.576457
chr6	47199268	47277641	-	ENSG00000146072	0.230322	8.09202	0.0637089	0.576457
chr4	107236701	107270383	+	ENSG00000164022	-0.203004	6.13653	0.0632302	0.576457
chr4	120218207	120225600	-	ENSG00000164096	-0.278036	7.17615	0.0633673	0.576457
chr17	38975358	38992522	+	ENSG00000167920	-0.436644	4.1153	0.0637032	0.576457
chr7	98475556	98610866	+	ENSG00000196367	0.221274	7.02147	0.0632197	0.576457
chr19	57321445	57352096	-	ENSG00000198300	0.234586	6.65362	0.0637061	0.576457
chr9	35681989	35691017	-	ENSG00000198467	1.06135	4.242	0.0631301	0.576457
chr2	170550998	170633499	+	ENSG00000213160	0.296286	4.48799	0.0634781	0.576457
chr15	63900817	64126141	-	ENSG00000103657	0.227198	7.46908	0.0638904	0.577583
chr6	167342992	167370679	-	ENSG00000026297	0.287334	4.3513	0.0671422	0.577939
chr17	40811323	40819024	+	ENSG00000037042	0.238076	4.66947	0.0675069	0.577939
chr5	73935848	74018472	+	ENSG00000049860	-0.344897	8.17754	0.0669937	0.577939
chr10	3109712	3179904	+	ENSG00000067057	-0.384504	7.32744	0.0659182	0.577939
chr15	63613577	63674360	-	ENSG00000074410	-0.415462	5.50787	0.0641988	0.577939
chr17	19674142	19771249	-	ENSG00000083290	0.238554	4.95293	0.0660915	0.577939
chr2	55463731	55496483	-	ENSG00000085760	-0.232715	5.57348	0.06512	0.577939
chr1	51752930	51810788	-	ENSG00000085831	-0.226062	7.188	0.0644687	0.577939
chr12	120907653	120936296	+	ENSG00000088986	0.207182	7.39433	0.0665707	0.577939
chr9	5765076	5833117	-	ENSG00000099219	0.263381	5.97981	0.0659811	0.577939
chr13	42031695	42045018	+	ENSG00000102760	-0.827436	3.54391	0.0649227	0.577939
chr16	12756919	12897874	-	ENSG00000103381	-0.378869	5.08925	0.0641898	0.577939
chr7	30634297	30673649	+	ENSG00000106105	-0.409889	7.57452	0.0664213	0.577939
chr7	12250867	12276886	+	ENSG00000106460	-0.286229	7.20364	0.0673429	0.577939
chr10	90973326	91174382	-	ENSG00000107798	0.199234	6.98565	0.0659049	0.577939
chr4	7060633	7069924	-	ENSG00000109519	-0.23551	5.39916	0.0654478	0.577939
chr11	2397407	2418627	+	ENSG00000110651	0.22173	8.63014	0.0654869	0.577939
chr6	24495080	24537435	+	ENSG00000112294	0.24101	5.07092	0.0641141	0.577939
chr5	172410760	172462448	+	ENSG00000113732	-0.230044	7.75252	0.0646276	0.577939
chr3	139236276	139258671	-	ENSG00000114115	0.335777	6.50356	0.0652546	0.577939
chr2	27714750	27718112	-	ENSG00000115226	-0.313479	4.24251	0.0672322	0.577939
chr2	54683422	54896812	+	ENSG00000115306	-0.230138	8.96532	0.0641865	0.577939
chr2	131862420	132111282	+	ENSG00000115762	-0.234334	7.98245	0.0660462	0.577939
chr1	231664287	231702270	+	ENSG00000116918	-0.203895	6.08384	0.0665836	0.577939
chr1	235530675	235612283	+	ENSG00000116957	-0.254974	4.78288	0.0675364	0.577939
chr2	20760208	20850849	-	ENSG00000118960	-0.289258	5.32324	0.0675463	0.577939
chr2	144703321	145090135	-	ENSG00000121964	-0.358015	3.77342	0.0644178	0.577939
chr2	152214106	152236560	+	ENSG00000123610	1.1238	3.29821	0.0666562	0.577939
chr20	57226328	57254582	+	ENSG00000124222	0.279465	7.52887	0.0657094	0.577939
chr20	56223448	56286592	-	ENSG00000124225	0.781972	7.02873	0.0650455	0.577939
chr19	19431490	19469564	+	ENSG00000129933	0.222102	6.2317	0.0654471	0.577939
chr7	55433141	55501435	+	ENSG00000132434	-0.251355	4.27138	0.0670689	0.577939
chr6	3153903	3157760	-	ENSG00000137267	-0.679373	5.85184	0.0661745	0.577939
chr6	17600586	17611950	+	ENSG00000137414	0.213623	6.15164	0.0660656	0.577939
chr15	40509629	40569688	+	ENSG00000137843	0.307082	4.53603	0.065177	0.577939
chr10	124591665	124639146	-	ENSG00000138161	0.739483	5.74629	0.0673305	0.577939
chr1	167885967	167906278	-	ENSG00000143158	0.268894	6.41966	0.0672287	0.577939
chr1	183605208	183897666	+	ENSG00000143344	0.252543	5.79056	0.0645358	0.577939
chr1	153931575	153940188	-	ENSG00000143570	-0.228012	6.98006	0.0655995	0.577939
chr3	31699382	32119072	-	ENSG00000144645	-0.292561	5.03582	0.0648258	0.577939
chr11	34874641	34938046	-	ENSG00000149089	0.477794	5.09228	0.0671261	0.577939
chr12	113796371	113827203	+	ENSG00000151176	0.234149	6.00191	0.0650282	0.577939
chr4	146678779	146859787	-	ENSG00000151612	0.271284	5.54619	0.0673151	0.577939
chr5	52083774	52099880	+	ENSG00000152684	-0.23668	5.68059	0.0659344	0.577939
chr10	99472930	99484694	+	ENSG00000155254	0.273519	4.54229	0.0655016	0.577939
chr9	134735494	134955295	-	ENSG00000160563	-0.247743	4.71866	0.0664798	0.577939
chr2	55746740	55773015	+	ENSG00000163001	-0.271407	6.44919	0.0661286	0.577939
chr3	88101094	88199035	-	ENSG00000163320	0.261854	7.00471	0.0659495	0.577939
chr7	45613739	45762715	+	ENSG00000164742	0.721807	6.36383	0.0647424	0.577939
chr15	67356101	67487533	+	ENSG00000166949	0.434754	6.20775	0.0663999	0.577939
chr18	21572737	21715574	+	ENSG00000168234	-0.378386	4.74327	0.0663569	0.577939
chr17	27887565	27894155	-	ENSG00000168792	0.24351	5.78368	0.0653822	0.577939
chr3	158288952	158325041	+	ENSG00000178053	-0.326322	4.34146	0.0670221	0.577939
chr16	15005408	15029565	+	ENSG00000183458	0.541856	4.50839	0.0644631	0.577939
chr15	102161847	102192594	-	ENSG00000184277	0.206998	5.99612	0.0664094	0.577939
chr14	85996488	86095034	+	ENSG00000185070	0.407576	6.77905	0.0668622	0.577939
chr19	42932440	42947200	-	ENSG00000189377	-0.474894	4.41775	0.0670213	0.577939
chr1	226033237	226070069	-	ENSG00000196187	0.306701	5.24485	0.0642326	0.577939
chr6	30687978	30693203	+	ENSG00000196230	-0.339529	9.62206	0.0675447	0.577939
chr2	68268262	68338080	-	ENSG00000197223	-0.282749	5.25637	0.0675862	0.577939
chr7	20042346	20042909	+	ENSG00000213860	-0.270549	8.19198	0.0669637	0.577939
chr1	995114	1004735	+	ENSG00000217801	-0.594091	2.93638	0.0653474	0.577939
chr11	62619460	62623386	-	ENSG00000255717	-0.244718	4.88248	0.0675741	0.577939
chr15	30832296	30838172	+	ENSG00000260693	0.397105	1.84433	0.0657943	0.577939
chr21	40546695	40555777	-	ENSG00000183527	-0.244252	4.63849	0.0677063	0.577989
chr2	148778580	149275805	+	ENSG00000204406	0.250498	5.02509	0.0676926	0.577989
chr15	90626277	90645736	-	ENSG00000182054	-0.236046	6.22994	0.0678367	0.578135
chr1	173833038	173838020	-	ENSG00000234741	-0.307623	7.14108	0.0678377	0.578135
chr8	37887859	37917883	+	ENSG00000187840	-0.400998	5.51671	0.0679863	0.578914
chr5	40825364	40835437	-	ENSG00000145592	-0.287319	9.04883	0.0680981	0.579378
chr10	70980059	71027315	+	ENSG00000156510	-0.261479	5.16067	0.0682406	0.580102
chr21	47401651	47424964	+	ENSG00000142156	0.746334	7.17677	0.0683721	0.580732
chr6	34857042	35059179	+	ENSG00000064999	0.222371	5.46025	0.0687599	0.581099
chr1	76251879	76260764	+	ENSG00000137955	-0.257669	6.74573	0.0685943	0.581099
chr1	46152886	46160115	+	ENSG00000159596	-0.239662	4.37684	0.0687591	0.581099
chr4	52886872	52904648	-	ENSG00000163069	0.243117	6.89484	0.0687571	0.581099
chr8	126442563	126450647	+	ENSG00000173334	-0.290148	5.9283	0.0687523	0.581099
chr19	4769117	4772545	+	ENSG00000176840	-0.262883	6.37578	0.0687572	0.581099
chr3	49454211	49460186	-	ENSG00000145020	0.289149	4.10333	0.0688929	0.581736
chr16	30434940	30441396	-	ENSG00000179958	-0.290591	4.8899	0.069117	0.582656
chr1	66258197	66840259	+	ENSG00000184588	0.676995	4.42043	0.069075	0.582656
chr17	39845137	39848920	+	ENSG00000173812	-0.286398	9.14758	0.0692387	0.583197
chr12	50505762	50559203	+	ENSG00000178449	-0.280108	5.15706	0.0693122	0.58333
chr19	18683030	18718551	-	ENSG00000006016	0.720295	4.05082	0.0694433	0.583462
chr6	133065009	133084598	-	ENSG00000112303	0.706525	3.84455	0.069402	0.583462
chr5	33987279	34124633	-	ENSG00000082196	0.339083	4.2851	0.0698238	0.585686
chr8	120428546	120436593	+	ENSG00000136999	-0.760365	3.99385	0.0698033	0.585686
chr12	108126643	108155049	-	ENSG00000110851	-0.21187	6.25275	0.0703351	0.588511
chr5	139505521	139508391	+	ENSG00000182700	0.235284	5.2781	0.070267	0.588511
chr5	130761584	131132710	-	ENSG00000217128	-0.199342	6.23374	0.0703234	0.588511
chr11	123396344	123498482	+	ENSG00000023171	-0.366103	5.29085	0.0704517	0.588586
chr2	224839829	224904036	-	ENSG00000135919	0.300156	6.44258	0.0705186	0.588586
chr1	151375200	151431941	-	ENSG00000143442	0.248443	7.36413	0.0704811	0.588586
chr12	1021243	1100356	-	ENSG00000002016	0.279931	4.17324	0.0718987	0.588908
chr12	69742121	69748014	+	ENSG00000090382	0.739019	6.28738	0.0717989	0.588908
chr16	30996519	31000473	+	ENSG00000099377	-0.346949	3.92573	0.071198	0.588908
chr19	35521588	35531352	+	ENSG00000105711	0.374378	5.14953	0.0716357	0.588908
chr6	485133	693117	-	ENSG00000112685	0.239002	6.16673	0.0715777	0.588908
chr5	137475455	137514675	-	ENSG00000112983	0.289187	6.36142	0.0716028	0.588908
chr3	20081515	20195896	+	ENSG00000114166	0.254244	6.71575	0.0711931	0.588908
chr1	6281252	6296032	-	ENSG00000116237	0.221089	6.92051	0.0718542	0.588908
chr19	50083903	50094272	+	ENSG00000126460	0.271963	4.02888	0.0722349	0.588908
chr9	19375713	19380252	-	ENSG00000137154	-0.288613	10.1121	0.0717071	0.588908
chr12	91496406	91505608	-	ENSG00000139329	0.851206	5.38505	0.0722355	0.588908
chr12	123773656	123834988	-	ENSG00000139697	-0.191722	6.76023	0.0722078	0.588908
chr1	150980896	151008189	+	ENSG00000143363	0.242574	6.09887	0.0711574	0.588908
chr1	154244987	154248351	+	ENSG00000143575	-0.286528	6.89325	0.0722266	0.588908
chr1	35734568	35887659	+	ENSG00000146463	0.218494	6.52111	0.0714966	0.588908
chr10	88810243	88854623	-	ENSG00000148672	0.19895	7.239	0.0706817	0.588908
chr2	42275160	42285668	+	ENSG00000162878	0.338575	4.36187	0.0714384	0.588908
chr3	186507669	186524847	-	ENSG00000163918	-0.271881	3.62466	0.0713856	0.588908
chr10	65281123	65384883	+	ENSG00000165476	0.311277	6.83201	0.0717069	0.588908
chr3	52568029	52613253	+	ENSG00000168273	-0.40612	3.71859	0.0714695	0.588908
chr2	149632819	149883273	+	ENSG00000168280	0.219307	7.8269	0.0719046	0.588908
chr3	14219858	14242619	+	ENSG00000170860	-0.250783	5.62712	0.0706968	0.588908
chr18	9102628	9134343	+	ENSG00000178127	-0.223141	6.87631	0.0707992	0.588908
chr19	3762662	3768573	+	ENSG00000183617	-0.307749	4.90595	0.0714762	0.588908
chr11	313506	315272	+	ENSG00000185885	0.564892	2.52116	0.0714805	0.588908
chr19	57019212	57041590	+	ENSG00000196263	0.299536	4.64401	0.0719672	0.588908
chr19	21579921	21610375	+	ENSG00000196268	0.32458	4.92115	0.0722454	0.588908
chr14	45431411	45543634	+	ENSG00000198718	0.249472	5.46365	0.0721002	0.588908
chr7	142457319	142460923	+	ENSG00000204983	-0.572671	9.54737	0.0719263	0.588908
chr2	118846028	118868573	+	ENSG00000125629	-0.263535	5.67294	0.0723216	0.589054
chr1	36067185	36107445	-	ENSG00000126067	-0.19993	6.7903	0.0723817	0.58907
chr13	107194021	107220512	-	ENSG00000134884	0.243109	6.4701	0.0728487	0.592394
chr6	160199530	160210781	-	ENSG00000120438	-0.201197	7.80881	0.0731458	0.592681
chr4	926175	952444	+	ENSG00000127419	0.2653	4.60974	0.0731187	0.592681
chr16	4511681	4545764	-	ENSG00000153406	-0.320601	4.64	0.0732138	0.592681
chr4	41258430	41270472	+	ENSG00000154277	-0.439988	8.18298	0.0730474	0.592681
chr3	187386694	187388187	-	ENSG00000157005	0.485604	11.5334	0.072983	0.592681
chr2	224461658	224467221	-	ENSG00000171951	0.391621	11.1976	0.0732356	0.592681
chr10	70883268	70932617	+	ENSG00000122958	-0.196497	5.98538	0.0733994	0.593532
chr14	75548822	75594047	-	ENSG00000119638	0.257345	7.16299	0.0734605	0.593552
chr13	95254157	95286899	+	ENSG00000152749	0.253246	5.59639	0.0736931	0.594956
chr3	113465866	113530903	+	ENSG00000114573	-0.204048	7.46246	0.0738023	0.595362
chr5	14704910	14871887	-	ENSG00000154122	0.207643	7.9316	0.0741462	0.596709
chr19	5680615	5688533	+	ENSG00000167733	0.337588	3.60362	0.0740897	0.596709
chr1	235294498	235324772	-	ENSG00000188739	-0.222505	5.18249	0.0740577	0.596709
chr20	57570240	57582302	-	ENSG00000101160	0.343355	7.99141	0.0743116	0.597564
chr6	111981535	112194655	-	ENSG00000010810	0.241613	5.84371	0.0752848	0.598733
chr5	41730167	41870621	-	ENSG00000083720	0.234279	5.6194	0.0751199	0.598733
chr9	111777432	111882225	-	ENSG00000106771	0.248189	7.51113	0.0752802	0.598733
chr14	45672393	45722743	-	ENSG00000129534	-0.224809	4.88873	0.0752256	0.598733
chr12	15066969	15092016	-	ENSG00000139055	0.593293	3.61748	0.0752613	0.598733
chr11	32605344	32627808	+	ENSG00000149100	-0.218155	6.89415	0.0749999	0.598733
chr1	151372010	151374420	+	ENSG00000159377	-0.219369	7.51615	0.0747269	0.598733
chr2	100889753	100939195	-	ENSG00000170500	0.202294	7.25867	0.0746066	0.598733
chr18	55018044	55038962	+	ENSG00000177511	0.251151	7.65995	0.0747055	0.598733
chr16	11762270	11773015	+	ENSG00000184602	-0.27447	4.91977	0.0749829	0.598733
chr9	96338689	96441869	+	ENSG00000197724	0.208289	6.48602	0.0752856	0.598733
chr8	59717977	60031767	-	ENSG00000198846	0.277485	5.28572	0.0752675	0.598733
chr10	52065360	52384795	-	ENSG00000198964	0.264228	5.1952	0.0747309	0.598733
chr6	30568177	30586389	-	ENSG00000204569	0.251808	6.27921	0.0747809	0.598733
chr11	60897728	60929089	-	ENSG00000167987	-0.278968	5.4843	0.0753714	0.598945
chr7	42948872	42971773	-	ENSG00000256646	-0.226919	5.62495	0.0754416	0.599032
chr5	16451628	16465901	-	ENSG00000173545	-0.237377	5.00497	0.0755636	0.59953
chr3	49061758	49066841	-	ENSG00000178035	-0.232437	7.09035	0.075648	0.59973
chr11	60467047	60483284	+	ENSG00000166959	0.586336	3.23778	0.0757538	0.600069
chr15	78276378	78370066	-	ENSG00000167202	0.296077	5.94618	0.0758094	0.600069
chr20	30780306	30795594	-	ENSG00000126003	0.225271	5.51202	0.0762255	0.60068
chr19	56643968	56672262	+	ENSG00000167685	0.274774	4.30713	0.0761586	0.60068
chr8	61099906	61193971	-	ENSG00000178538	0.297623	4.73605	0.0762095	0.60068
chr1	149856010	149858232	-	ENSG00000184678	0.327318	4.60751	0.0762429	0.60068
chr12	53835389	53840429	+	ENSG00000205352	-0.280333	7.04276	0.0762402	0.60068
chr16	3661729	3730144	+	ENSG00000213918	0.234146	4.60135	0.076044	0.60068
chr2	163123589	163175213	-	ENSG00000115267	0.310394	5.5451	0.0763329	0.600921
chr9	119449581	119463579	+	ENSG00000119401	0.255292	4.49421	0.0764028	0.601003
chr20	42875887	42909013	+	ENSG00000124194	-0.48242	3.19067	0.0767457	0.603089
chr17	25956824	25976586	+	ENSG00000168961	0.307129	5.0677	0.0767872	0.603089
chr7	100199800	100205798	+	ENSG00000106333	0.870457	3.42743	0.0770227	0.603328
chr8	74206847	74237516	+	ENSG00000121039	-0.309743	4.68535	0.0769941	0.603328
chr12	40148823	40499891	-	ENSG00000151229	-0.352861	7.12659	0.0770562	0.603328
chr4	159630286	159644548	-	ENSG00000171497	0.205442	6.02468	0.0769046	0.603328
chr8	29989340	30002202	-	ENSG00000177669	0.521915	3.87935	0.0773423	0.6051
chr20	34894258	35157040	+	ENSG00000080845	-0.23282	6.89966	0.0777363	0.606125
chr7	99613204	99639312	+	ENSG00000106261	0.215535	8.68921	0.0776119	0.606125
chr10	70939988	70968855	+	ENSG00000156502	-0.234883	4.75016	0.0776782	0.606125
chr5	146967990	147162338	-	ENSG00000176049	0.270616	4.76702	0.0777728	0.606125
chr5	150480273	150537443	-	ENSG00000197043	0.229711	8.1862	0.0777171	0.606125
chr12	129277739	129308528	-	ENSG00000139370	-0.288127	5.65037	0.0778908	0.606577
chr17	74385532	74449288	-	ENSG00000175931	0.218523	5.95041	0.0779823	0.606822
chr9	35609530	35646807	-	ENSG00000137101	-0.411111	4.17275	0.0782058	0.607293
chr2	45168902	45173216	+	ENSG00000138083	0.871901	4.24259	0.078283	0.607293
chr22	50296867	50312106	-	ENSG00000182858	0.241497	4.50675	0.0781646	0.607293
chr16	68563993	68609948	+	ENSG00000184939	0.218126	5.15838	0.0782795	0.607293
chr7	5566782	5603415	-	ENSG00000075624	-0.260214	10.5581	0.0786847	0.608825
chr10	127524906	127585005	-	ENSG00000089876	-0.221147	5.78126	0.078806	0.608825
chr1	155829300	155854990	+	ENSG00000132718	0.20926	7.74265	0.0786203	0.608825
chr10	7830092	7849778	+	ENSG00000165629	-0.227812	7.51573	0.0789018	0.608825
chr16	18511182	18573533	-	ENSG00000185164	0.252723	8.25808	0.0787711	0.608825
chr11	117156402	117186975	-	ENSG00000186318	0.238711	7.24642	0.0786859	0.608825
chr17	33895139	33901811	+	ENSG00000267321	-0.326459	3.26216	0.0788465	0.608825
chr11	17095936	17099334	-	ENSG00000110700	-0.27586	8.62979	0.0791195	0.610041
chr11	61976140	61981408	+	ENSG00000124939	-0.550844	5.82607	0.0793194	0.611116
chr8	38758753	38831428	+	ENSG00000169499	0.275208	4.90367	0.0794733	0.611765
chr11	117704434	117709522	+	ENSG00000254528	-0.585064	4.43688	0.0795246	0.611765
chr19	15464196	15490612	-	ENSG00000105127	-0.225935	4.92608	0.0796141	0.611988
chr7	32524951	32534895	-	ENSG00000106355	-0.240982	4.96312	0.0798463	0.613307
chr9	86451613	86536342	-	ENSG00000165115	0.294989	3.7665	0.0800211	0.613718
chr11	61560109	61564716	+	ENSG00000168496	-0.315801	4.10339	0.0799742	0.613718
chr5	1456595	1524092	-	ENSG00000153395	-0.243458	6.35995	0.0802483	0.614994
chr20	3189514	3204516	+	ENSG00000125877	-0.29163	4.59504	0.080406	0.61527
chr16	48390275	48482313	-	ENSG00000196470	-0.215959	5.26985	0.0803588	0.61527
chr16	70413338	70473140	-	ENSG00000157350	0.298654	4.45658	0.0805726	0.615787
chr5	149980642	150038782	+	ENSG00000171992	-0.320426	8.10338	0.0805952	0.615787
chr15	83328033	83378666	-	ENSG00000103723	0.264989	5.64821	0.0808471	0.616464
chr1	17345217	17380665	-	ENSG00000117118	-0.212639	6.22781	0.0808667	0.616464
chr19	20011722	20046384	+	ENSG00000184635	0.306571	3.64873	0.0807961	0.616464
chr5	151040657	151066726	-	ENSG00000113140	1.20547	8.2155	0.081007	0.616885
chr10	115880621	115933979	-	ENSG00000165813	0.252686	6.64794	0.0810439	0.616885
chr5	75699074	76003957	+	ENSG00000145703	0.332194	5.07202	0.0811799	0.617381
chr6	169615875	169654139	-	ENSG00000186340	1.32768	6.18853	0.0812311	0.617381
chr22	47080308	47134158	-	ENSG00000100422	0.220658	8.45141	0.0815102	0.617646
chr19	45349432	45392485	+	ENSG00000130202	0.225388	6.41761	0.0814324	0.617646
chr7	138915102	138992981	+	ENSG00000157741	0.250027	6.34668	0.0814969	0.617646
chr1	11539223	11597641	+	ENSG00000204624	-0.443305	4.77916	0.081395	0.617646
chr15	48700503	48938046	-	ENSG00000166147	1.13307	5.4277	0.0816308	0.618097
chr10	105253736	105352309	+	ENSG00000107954	0.205921	7.05832	0.0817493	0.618531
chr11	8714898	8932498	-	ENSG00000166444	0.254041	6.05322	0.0819773	0.619793
chr17	57642886	57685706	+	ENSG00000108406	-0.223371	6.66888	0.0823918	0.621444
chr12	7341281	7371170	+	ENSG00000139197	-0.207884	6.00007	0.082435	0.621444
chr1	206516198	206637783	+	ENSG00000163486	0.301313	6.16667	0.0824415	0.621444
chr10	13629006	13710299	+	ENSG00000239665	0.370662	2.92227	0.0822748	0.621444
chr1	110091233	110136975	+	ENSG00000065135	-0.189213	6.83125	0.0825587	0.621595
chr4	100869243	100871545	-	ENSG00000164032	-0.257444	7.16624	0.0825845	0.621595
chr16	87360593	87425748	-	ENSG00000103264	0.262378	5.78923	0.0827405	0.622307
chr16	67204057	67209643	+	ENSG00000140939	-0.338026	5.78847	0.0831393	0.624842
chr19	42502473	42573650	-	ENSG00000105737	0.348337	4.56218	0.0837694	0.628177
chr20	1290619	1309883	-	ENSG00000125775	-0.397945	4.41695	0.0838935	0.628177
chr18	904944	912173	+	ENSG00000141433	-0.374032	7.39598	0.0838631	0.628177
chr3	39448180	39453929	+	ENSG00000168028	-0.293506	9.76703	0.0836793	0.628177
chr5	180688213	180699308	+	ENSG00000248275	-0.331249	2.80289	0.0837599	0.628177
chr10	70242521	70287231	-	ENSG00000122912	-0.249254	3.95296	0.0839769	0.628336
chr17	73034958	73043080	-	ENSG00000167863	-0.233278	6.93036	0.0840833	0.628667
chr17	37219556	37310647	-	ENSG00000161381	1.1349	3.84942	0.0844794	0.631162
chr1	28832492	28837404	+	ENSG00000242125	-0.24117	4.61734	0.0846549	0.632007
chr17	76670130	76778379	-	ENSG00000108669	0.223828	5.24085	0.0847898	0.632547
chr6	161412759	161538417	+	ENSG00000085511	0.303209	5.77291	0.0850089	0.632736
chr15	101821715	101835487	-	ENSG00000131876	-0.245568	4.88935	0.0850358	0.632736
chr15	91411822	91426688	+	ENSG00000140564	0.241038	7.87101	0.0850653	0.632736
chr14	105639275	105647660	-	ENSG00000183828	-0.311843	4.62605	0.084916	0.632736
chr1	155247374	155259639	+	ENSG00000143630	0.323934	4.36173	0.0853394	0.633377
chr8	74202506	74208024	-	ENSG00000147604	-0.259943	9.79563	0.0852376	0.633377
chr12	133498047	133532892	-	ENSG00000196458	0.226968	5.17045	0.0852907	0.633377
chr5	141232938	141258811	-	ENSG00000156453	0.332149	5.8077	0.0854098	0.633435
chr9	33247818	33264761	-	ENSG00000107262	-0.299632	6.62649	0.0859873	0.635389
chr1	31769842	31837783	+	ENSG00000121766	-0.259622	5.31062	0.085891	0.635389
chr12	57623110	57628718	+	ENSG00000182199	-0.35275	6.46627	0.0857471	0.635389
chr1	22303514	22325135	+	ENSG00000219073	-1.18969	5.73131	0.0858693	0.635389
chr6	26839263	26924333	-	ENSG00000241549	0.507687	2.65042	0.0859557	0.635389
chr11	63304281	63313934	+	ENSG00000133321	0.354871	2.89636	0.0860672	0.635515
chr7	117105838	117356025	+	ENSG00000001626	0.422577	9.01335	0.0866613	0.636288
chr2	37326353	37384208	-	ENSG00000055332	0.208004	6.58119	0.0867122	0.636288
chr9	2015342	2193624	+	ENSG00000080503	0.294421	7.89098	0.0868279	0.636288
chr3	127348024	127391652	+	ENSG00000114631	0.341783	6.37838	0.0865476	0.636288
chr5	68389473	68426896	+	ENSG00000145740	0.202444	6.38944	0.0867336	0.636288
chr8	124510129	124553446	-	ENSG00000156804	-0.272706	4.8382	0.0868638	0.636288
chr3	52558386	52569070	-	ENSG00000168268	0.289466	5.79625	0.0867925	0.636288
chr15	75246757	75249805	-	ENSG00000178718	-0.326965	4.76201	0.0867084	0.636288
chr1	155112367	155113071	-	ENSG00000179085	0.392515	4.12269	0.0863056	0.636288
chr16	75032928	75144892	+	ENSG00000186187	0.264046	4.66636	0.086268	0.636288
chr4	110661852	110723335	-	ENSG00000205403	0.617959	6.0557	0.0868179	0.636288
chr1	24683489	24743424	-	ENSG00000001460	0.239123	4.39282	0.0871501	0.636657
chr16	1662326	1727909	+	ENSG00000007545	0.245999	5.22087	0.0872288	0.636657
chr7	2393721	2420380	+	ENSG00000106263	-0.191405	6.85093	0.0871749	0.636657
chr2	96068469	96082364	+	ENSG00000115042	0.251796	4.41474	0.0871009	0.636657
chr20	1875154	1920543	+	ENSG00000198053	0.413507	5.0315	0.0871668	0.636657
chr20	33804634	33865934	-	ENSG00000126005	-0.387858	5.87248	0.0873664	0.637202
chr12	56703626	56710120	-	ENSG00000257727	0.239913	7.04613	0.0876777	0.639011
chr16	47188298	47498060	-	ENSG00000129636	0.231148	7.49407	0.0878448	0.639308
chr14	50999227	51099786	+	ENSG00000198513	-0.28391	4.7403	0.0878327	0.639308
chr7	12726481	12730559	+	ENSG00000122644	-0.256982	3.96317	0.0882374	0.641704
chr9	103189438	103213511	+	ENSG00000066697	-0.307338	4.85056	0.0885511	0.641914
chr3	125165495	125239041	-	ENSG00000114520	-0.214398	5.88617	0.0885286	0.641914
chr17	57751997	57784987	-	ENSG00000141378	-0.232109	4.50476	0.08848	0.641914
chr4	84011201	84058228	-	ENSG00000145287	0.3419	3.40504	0.0886153	0.641914
chr4	155456158	155471587	-	ENSG00000171566	-0.18552	6.09532	0.0883406	0.641914
chr6	35436185	35438562	+	ENSG00000198755	-0.251965	8.68374	0.0887105	0.641914
chr9	101705461	101833069	+	ENSG00000204291	1.20264	7.11999	0.0887065	0.641914
chr6	150070579	150132556	+	ENSG00000120265	-0.237847	6.96122	0.0889872	0.643456
chr18	12446511	12658133	-	ENSG00000134278	-0.251294	6.49629	0.0890641	0.643552
chr7	51083909	51384515	-	ENSG00000106078	0.255567	6.30153	0.0891354	0.643607
chr7	73007524	73038873	-	ENSG00000009950	0.421985	7.66093	0.08949	0.64387
chr16	3072621	3074287	-	ENSG00000103145	-0.375112	4.75634	0.0892797	0.64387
chr8	356428	421225	+	ENSG00000147364	-0.25561	5.22188	0.0894327	0.64387
chr15	44038590	44065477	+	ENSG00000167004	0.230058	9.97616	0.0894711	0.64387
chr19	867961	893218	-	ENSG00000175221	0.228202	5.23053	0.0893892	0.64387
chr1	24171567	24194784	-	ENSG00000179163	0.259585	7.00179	0.0896722	0.644722
chr6	131160487	131384462	-	ENSG00000079819	-0.200585	5.91987	0.0898289	0.644794
chr8	26240414	26363152	+	ENSG00000104765	-0.26209	7.63613	0.0898734	0.644794
chr5	70330784	70363516	-	ENSG00000145736	0.396576	4.29056	0.0898233	0.644794
chr15	75212132	75230509	-	ENSG00000178741	-0.233377	6.12956	0.0899991	0.645238
chr12	9092959	9102551	-	ENSG00000003056	-0.203162	7.64813	0.0901326	0.645314
chr17	7128660	7137864	-	ENSG00000004975	-0.262293	5.77419	0.0901373	0.645314
chr3	133317019	133380737	-	ENSG00000163781	-0.224699	5.62147	0.0902168	0.645427
chr1	58881056	59012474	-	ENSG00000162600	0.216313	4.90654	0.0903298	0.645778
chr20	57414773	57486247	+	ENSG00000087460	0.23753	12.6549	0.090493	0.645779
chr15	65255362	65282648	-	ENSG00000090487	-0.183786	6.77064	0.0904405	0.645779
chr19	37001597	37019562	-	ENSG00000254004	0.226413	5.32227	0.0905213	0.645779
chr12	109525993	109531436	-	ENSG00000189046	-0.34071	3.07307	0.0906457	0.64621
chr14	91737667	91884188	-	ENSG00000015133	0.404413	5.12282	0.090915	0.646308
chr5	133706870	133727683	+	ENSG00000119048	-0.189297	6.37231	0.090824	0.646308
chr6	107077453	107116292	+	ENSG00000130348	-0.236587	4.66274	0.0908893	0.646308
chr17	61600695	61626338	+	ENSG00000173826	0.426303	4.24889	0.0908068	0.646308
chr8	99037079	99058697	-	ENSG00000156482	-0.266166	9.04473	0.0913675	0.647915
chr1	1370241	1378262	+	ENSG00000179403	0.359845	6.54954	0.0913973	0.647915
chr7	92817899	92855837	-	ENSG00000188175	0.268106	7.08484	0.0912573	0.647915
chr6	31698358	31707540	-	ENSG00000213719	-0.213373	7.95119	0.0913973	0.647915
chr12	72148654	72184699	+	ENSG00000080371	-0.183262	6.62357	0.0915314	0.647958
chr8	99114572	99129469	-	ENSG00000132541	0.235162	4.33831	0.0915141	0.647958
chr1	9789084	9884584	-	ENSG00000171603	0.216163	7.9245	0.0915988	0.647981
chr14	65412532	65439494	-	ENSG00000139998	0.243604	6.38471	0.0919417	0.649952
chr11	47269851	47290396	+	ENSG00000025434	0.332366	3.0149	0.0939934	0.649961
chr11	113668596	113746292	-	ENSG00000048028	0.249901	4.91453	0.0936815	0.649961
chr22	19437464	19466738	-	ENSG00000070010	-0.194784	5.93308	0.0923649	0.649961
chr19	58231119	58238992	-	ENSG00000083814	0.244989	4.146	0.0929828	0.649961
chr1	241660903	241683061	-	ENSG00000091483	-0.19114	6.25869	0.0934701	0.649961
chr7	132469629	132766848	-	ENSG00000106554	-0.208085	5.37438	0.0934152	0.649961
chr17	30771279	30810336	+	ENSG00000108671	-0.177629	6.66538	0.0935516	0.649961
chr17	53342373	53402426	+	ENSG00000108924	-0.402362	5.57326	0.0931439	0.649961
chr11	47638867	47664175	-	ENSG00000109919	-0.213795	6.9595	0.0921618	0.649961
chr12	51373184	51422349	-	ENSG00000110911	-0.240299	6.4239	0.0939655	0.649961
chr11	61520114	61555990	+	ENSG00000124920	0.196568	6.67879	0.0935923	0.649961
chr1	155657751	155708803	+	ENSG00000132676	-0.199011	6.52069	0.0939613	0.649961
chr2	105953816	105965668	+	ENSG00000135974	0.246155	4.97826	0.0930098	0.649961
chr12	4714110	4798454	+	ENSG00000139180	-0.197066	6.26707	0.0930788	0.649961
chr1	153700543	153746555	+	ENSG00000143624	0.22527	7.00505	0.0934174	0.649961
chr2	198351305	198381461	-	ENSG00000144381	-0.219587	8.76629	0.0930592	0.649961
chr6	139349819	139364439	+	ENSG00000146386	-0.248908	4.83469	0.0921202	0.649961
chr12	107349497	107372556	+	ENSG00000151135	0.186926	6.85367	0.0924854	0.649961
chr10	320130	735683	-	ENSG00000151240	-0.222142	7.14062	0.0934839	0.649961
chr8	126103921	126379362	+	ENSG00000156831	-0.287959	4.22678	0.0933616	0.649961
chr5	125877533	125931110	-	ENSG00000164904	0.213627	5.57077	0.0924781	0.649961
chr8	100885428	100906290	-	ENSG00000164919	-0.242273	6.9383	0.0939414	0.649961
chr11	86748886	87034756	+	ENSG00000166575	-0.208789	5.32735	0.092124	0.649961
chr22	25202236	25323545	+	ENSG00000167037	-0.231369	5.71292	0.0937642	0.649961
chr11	65479467	65487075	+	ENSG00000172977	-0.225867	6.0801	0.0928848	0.649961
chr17	57409050	57479090	+	ENSG00000175155	0.290637	6.26431	0.0936977	0.649961
chr17	4402133	4442330	+	ENSG00000183018	-0.471463	5.0612	0.0936932	0.649961
chr7	155437145	155574179	+	ENSG00000184863	0.234596	6.34466	0.0927393	0.649961
chr9	137208944	137332431	+	ENSG00000186350	0.245706	6.39688	0.0930795	0.649961
chr6	29909037	29913661	+	ENSG00000206503	0.335415	10.4738	0.0925298	0.649961
chr17	6915736	6917851	+	ENSG00000219200	0.451102	6.53605	0.0929208	0.649961
chr11	118955576	118964259	+	ENSG00000256269	-0.283886	4.08618	0.0939989	0.649961
chr17	43128978	43186384	+	ENSG00000136448	0.186896	7.15575	0.0940897	0.650144
chr4	54325468	54567572	-	ENSG00000072201	0.276787	4.3177	0.0942102	0.650532
chr11	63706431	63724800	+	ENSG00000110583	0.203318	5.72254	0.0944506	0.651748
chr11	22835345	22851845	-	ENSG00000198168	-0.228239	6.93546	0.0945986	0.652324
chr18	8705659	8832776	+	ENSG00000168502	0.226783	4.5266	0.0946689	0.652364
chr12	99038919	99129204	+	ENSG00000120868	0.249252	5.32322	0.0948209	0.652523
chr10	124221041	124274424	+	ENSG00000166033	0.433583	5.43031	0.0947729	0.652523
chr14	103589779	103603776	+	ENSG00000185215	0.56509	6.28556	0.0949013	0.652632
chr7	44256749	44374176	-	ENSG00000058404	0.207047	6.3063	0.0954174	0.652632
chr3	52002526	52017425	-	ENSG00000114779	0.253693	5.86268	0.095111	0.652632
chr4	88928820	88998929	+	ENSG00000118762	0.266604	6.50724	0.0952001	0.652632
chr13	50486842	50510626	-	ENSG00000123178	-0.267546	4.94281	0.0953473	0.652632
chr4	103172198	103352415	-	ENSG00000138821	-0.303807	4.73958	0.0952365	0.652632
chr4	141786725	142134031	-	ENSG00000170153	0.370711	4.095	0.0952206	0.652632
chr1	33065773	33116504	-	ENSG00000176261	-0.2216	4.84647	0.0952857	0.652632
chr1	143913615	144094424	+	ENSG00000196369	0.299424	3.6344	0.0954022	0.652632
chr11	47199076	47207994	-	ENSG00000165912	-0.398953	3.83978	0.0955432	0.653051
chr8	23127633	23153792	+	ENSG00000104679	-0.2573	4.43587	0.0956221	0.653087
chr17	30334891	30380523	+	ENSG00000185158	-0.242543	4.45057	0.0957318	0.653087
chr15	96869167	96883492	+	ENSG00000185551	0.396506	4.49701	0.0957994	0.653087
chr17	6915928	6917755	-	ENSG00000269871	0.259019	6.59881	0.0958068	0.653087
chr9	19053141	19103117	-	ENSG00000147874	-0.233124	5.15132	0.0958842	0.653175
chr16	47495034	47735434	+	ENSG00000102893	0.192831	6.85954	0.0961398	0.654475
chr4	170650616	170679104	-	ENSG00000056050	-0.206588	4.71314	0.0962511	0.654792
chr7	106685094	106802256	+	ENSG00000005249	0.398439	4.97734	0.0964156	0.655031
chr3	39093489	39138155	+	ENSG00000114742	0.188129	6.15399	0.0963602	0.655031
chr18	44388353	44500123	-	ENSG00000078043	-0.218598	4.93449	0.0966301	0.656047
chr1	28527068	28559536	-	ENSG00000126698	-0.18643	6.83568	0.0967273	0.656266
chr1	174968300	174980851	+	ENSG00000116161	-0.188377	6.50935	0.0968821	0.656721
chr15	85359911	85416713	+	ENSG00000136383	-0.227771	7.91864	0.0969241	0.656721
chr18	55267888	55289445	-	ENSG00000134440	-0.189398	7.98475	0.0972028	0.657349
chr9	127620159	127624260	-	ENSG00000136942	-0.2928	8.25046	0.0971256	0.657349
chr12	108908962	108919614	+	ENSG00000198855	-0.26686	4.92694	0.0972117	0.657349
chr2	160175490	160473203	-	ENSG00000123636	0.24188	6.86077	0.0972948	0.657456
chr4	25656923	25680370	+	ENSG00000157765	0.871883	4.55937	0.0974875	0.657456
chr3	43396351	43733086	-	ENSG00000160746	-0.239059	5.51942	0.0973947	0.657456
chr8	94870035	94938294	+	ENSG00000164951	-0.251672	5.85489	0.0974374	0.657456
chr1	150335567	150449042	+	ENSG00000163125	0.19139	6.52257	0.0976439	0.658071
chr11	134020014	134095348	-	ENSG00000151503	0.226825	5.23932	0.0979725	0.659424
chr19	55550476	55582659	-	ENSG00000160439	-0.255437	4.82756	0.0979749	0.659424
chr20	18467184	18477887	-	ENSG00000089050	-0.243215	4.83465	0.0980718	0.659637
chr9	117782806	117880536	-	ENSG00000041982	2.1641	5.62199	0.0982586	0.660455
chr20	5892076	5906007	+	ENSG00000089199	0.288204	13.074	0.0984289	0.660783
chr6	30585486	30594172	+	ENSG00000204568	-0.220542	6.04423	0.0984381	0.660783
chr22	30972615	31003070	-	ENSG00000100029	-0.197432	5.81912	0.0986435	0.660839
chr9	139756571	139760738	-	ENSG00000107223	-0.267022	7.11899	0.0987078	0.660839
chr7	115850547	115898837	+	ENSG00000135269	-0.236813	6.28767	0.0986237	0.660839
chr15	25200133	25245423	+	ENSG00000214265	0.220742	8.22573	0.0985752	0.660839
chr6	107018903	107077373	-	ENSG00000130347	-0.26998	3.42292	0.0989208	0.66142
chr1	249104648	249120832	-	ENSG00000175137	0.216109	4.85825	0.0989625	0.66142
chr10	120900279	120925179	-	ENSG00000183605	-0.268996	4.5411	0.0989906	0.66142
chr5	68856035	68890550	+	ENSG00000183474	0.288126	5.37673	0.0990728	0.661532
chr15	66628544	66679084	-	ENSG00000075131	-0.325458	3.11322	0.0992086	0.662001
chr10	16478964	16555736	+	ENSG00000165983	-0.206993	4.97648	0.0993964	0.662817
chr11	8968841	8986558	-	ENSG00000175348	-0.174493	6.1665	0.0996557	0.663672
chr6	27325604	27339304	-	ENSG00000204789	0.195118	5.86198	0.0996008	0.663672
chr14	64854749	64926725	+	ENSG00000100714	-0.211416	5.63608	0.100079	0.665131
chr1	43212006	43232755	-	ENSG00000117385	0.318068	5.55562	0.100132	0.665131
chr19	48824766	48833810	+	ENSG00000142227	-0.390025	3.95607	0.100138	0.665131
chr16	69796209	69975644	+	ENSG00000198373	-0.234574	5.62584	0.100099	0.665131
chr12	6602522	6641121	+	ENSG00000010292	0.232209	5.60624	0.100466	0.665736
chr5	127419458	127525380	+	ENSG00000064651	0.469504	5.81193	0.100558	0.665736
chr12	6874682	6880116	+	ENSG00000159335	0.257677	6.53552	0.100502	0.665736
chr4	17802278	17812381	-	ENSG00000163257	-0.20417	5.65798	0.100471	0.665736
chr17	47481414	47492246	-	ENSG00000167085	-0.216458	6.69103	0.100494	0.665736
chr22	37966255	37978623	-	ENSG00000100079	-0.561966	3.61852	0.100856	0.666882
chr11	14515329	14665181	-	ENSG00000129084	-0.193634	7.07884	0.101108	0.666882
chr1	38032417	38061536	-	ENSG00000134697	-0.195447	6.01875	0.101188	0.666882
chr10	114710009	114927437	+	ENSG00000148737	0.294586	4.62876	0.101168	0.666882
chr13	21296543	21348097	-	ENSG00000150456	-0.287355	3.12796	0.100944	0.666882
chr8	140742586	141468678	-	ENSG00000167632	0.242134	6.01109	0.100932	0.666882
chr22	39378352	39388809	+	ENSG00000179750	-2.00926	3.12539	0.101193	0.666882
chr14	105714827	105717430	+	ENSG00000184887	-0.244624	5.4105	0.101486	0.668383
chr14	61654277	62017694	+	ENSG00000027075	-0.228022	4.89368	0.101754	0.668821
chr11	17373273	17398888	+	ENSG00000188211	-0.255615	5.44442	0.10175	0.668821
chr22	44888452	44894178	-	ENSG00000188636	0.217395	6.26252	0.101638	0.668821
chr16	89387541	89391518	+	ENSG00000261253	-0.549279	2.73863	0.101817	0.668821
chr5	175665365	175772994	+	ENSG00000170085	0.209225	4.61492	0.101915	0.669026
chr15	47476298	48066420	+	ENSG00000137872	0.251783	5.50292	0.102064	0.669136
chr19	56146382	56154835	+	ENSG00000213015	0.246473	3.96877	0.102019	0.669136
chr1	146093234	146159103	-	ENSG00000227733	0.322659	2.53046	0.102234	0.669816
chr20	31407699	31438211	+	ENSG00000101367	-0.204748	8.22907	0.10243	0.670231
chr12	82617460	82752584	-	ENSG00000133773	-0.204925	4.4445	0.102377	0.670231
chr12	104343980	104359486	-	ENSG00000204954	-0.307462	3.61149	0.102524	0.670418
chr15	84322838	84708594	+	ENSG00000156218	0.280524	3.87992	0.102867	0.672222
chr7	74071994	74175026	+	ENSG00000077809	0.246256	9.20702	0.10332	0.673027
chr7	130020180	130027955	+	ENSG00000091704	-0.888311	8.27686	0.103093	0.673027
chr18	13726659	13764557	+	ENSG00000101654	-0.201102	6.25492	0.103212	0.673027
chr4	2271309	2420390	-	ENSG00000159733	0.306534	4.01784	0.103178	0.673027
chr5	177377336	177390961	+	ENSG00000249684	0.318469	3.08246	0.103323	0.673027
chr22	46449585	46453090	+	ENSG00000241990	-0.324158	3.01175	0.103409	0.673159
chr11	63997750	64001758	+	ENSG00000110011	0.264851	4.60297	0.103739	0.673189
chr1	47073387	47082563	-	ENSG00000142961	0.27726	4.54945	0.103497	0.673189
chr15	49447853	49660066	+	ENSG00000156958	-0.238311	5.29507	0.103813	0.673189
chr6	123110315	123130865	+	ENSG00000172594	-0.392705	4.98092	0.103577	0.673189
chr9	116917840	117074791	+	ENSG00000196739	0.443832	6.43397	0.103798	0.673189
chr6	136878185	137113656	-	ENSG00000197442	0.370875	5.1245	0.103741	0.673189
chr17	28575218	28619074	-	ENSG00000108578	0.254671	5.78317	0.103901	0.673273
chr3	135969148	136056738	+	ENSG00000114054	0.192937	5.77789	0.104118	0.673273
chr15	82422571	82555104	-	ENSG00000140598	-0.200208	5.43282	0.104116	0.673273
chr11	108093211	108239829	+	ENSG00000149311	0.23226	7.37024	0.104076	0.673273
chr21	30396950	30426809	+	ENSG00000156256	-0.219282	6.21945	0.104159	0.673273
chr10	97365696	97416463	-	ENSG00000059573	0.20972	6.96212	0.10467	0.673991
chr7	107531415	107572175	+	ENSG00000091140	-0.194436	6.76657	0.104589	0.673991
chr1	23685941	23695935	-	ENSG00000125945	0.280665	4.55102	0.104367	0.673991
chr1	89401456	89458636	-	ENSG00000137944	-0.332243	5.17377	0.10461	0.673991
chr5	179159851	179223512	+	ENSG00000161021	0.251143	5.66198	0.10466	0.673991
chr15	65950384	66084631	-	ENSG00000174485	0.225377	6.55593	0.104469	0.673991
chr11	17515442	17565963	-	ENSG00000006611	0.228662	5.66094	0.104775	0.674181
chr19	36505562	36524245	-	ENSG00000105270	0.279669	5.53442	0.10494	0.674181
chr13	110406184	110438915	-	ENSG00000185950	-0.260928	5.49683	0.104842	0.674181
chr19	11274943	11308467	-	ENSG00000197256	0.559001	4.64058	0.104966	0.674181
chr1	153586731	153589462	-	ENSG00000189334	-0.4219	4.60889	0.105092	0.674565
chr2	28112808	28561768	+	ENSG00000158019	-0.194893	5.76773	0.105299	0.675465
chr16	1820287	1821731	-	ENSG00000103024	0.409519	3.85358	0.10544	0.675509
chr4	184365744	184369351	+	ENSG00000168564	0.232742	4.93332	0.10539	0.675509
chr17	79876146	79885590	-	ENSG00000197063	-0.18788	6.17365	0.105596	0.676083
chr16	69458428	69500169	+	ENSG00000103018	-0.182657	6.10506	0.105972	0.676204
chr5	135364584	135399507	+	ENSG00000120708	1.17005	6.99361	0.106016	0.676204
chr9	139776364	139821059	+	ENSG00000127191	0.298372	4.04078	0.106001	0.676204
chr9	130830480	130871524	+	ENSG00000148339	-0.25753	5.25364	0.105859	0.676204
chr15	90220995	90234014	-	ENSG00000166821	0.237232	4.08782	0.1057	0.676204
chr16	88922628	88929094	+	ENSG00000167515	-0.302576	5.34555	0.105886	0.676204
chr3	167401086	167452727	-	ENSG00000114209	-0.215413	5.84623	0.106228	0.677126
chr7	30536237	30591095	-	ENSG00000006625	-0.227221	4.7302	0.106408	0.677847
chr11	125825691	125933230	-	ENSG00000064309	-0.34079	6.16413	0.10648	0.67788
chr8	109455830	109499145	+	ENSG00000104412	-0.19139	6.01258	0.107031	0.680961
chr4	100257649	100274184	-	ENSG00000248144	1.02223	5.48056	0.107196	0.681583
chr19	5691845	5720583	-	ENSG00000196365	-0.276575	6.58834	0.107292	0.681649
chr6	29523406	29601753	-	ENSG00000204681	0.256123	5.46333	0.107341	0.681649
chr6	119498374	119670926	-	ENSG00000111885	0.317967	8.72674	0.10745	0.681909
chr6	42531800	42661242	+	ENSG00000024048	0.205815	6.40297	0.10798	0.682308
chr2	203130439	203168389	+	ENSG00000055044	-0.173801	6.11135	0.108085	0.682308
chr3	123328896	123603178	-	ENSG00000065534	0.833243	4.4444	0.107946	0.682308
chr17	61904512	61909379	+	ENSG00000087191	-0.214952	7.1127	0.108073	0.682308
chr20	34129770	34145405	+	ENSG00000125991	0.19881	7.3432	0.108028	0.682308
chr1	33240840	33283754	-	ENSG00000134684	-0.336875	6.91856	0.107611	0.682308
chr1	52873954	53019159	-	ENSG00000134744	0.248663	6.24913	0.10787	0.682308
chr1	156707095	156711382	-	ENSG00000143314	-0.211911	5.51989	0.10812	0.682308
chr1	65210778	65298915	+	ENSG00000162437	0.238543	5.62187	0.108093	0.682308
chr11	867357	915058	-	ENSG00000177830	0.284892	6.61872	0.108287	0.682937
chr1	150121373	150132260	+	ENSG00000023902	-0.490494	4.35728	0.108655	0.683015
chr22	38226862	38240438	-	ENSG00000100124	0.225283	4.21648	0.108857	0.683015
chr20	2632791	2639039	+	ENSG00000101361	-0.209167	6.4906	0.108907	0.683015
chr19	925781	975939	+	ENSG00000116017	-0.266042	4.82463	0.108428	0.683015
chr2	33808725	33824449	-	ENSG00000119812	0.205577	6.07311	0.108628	0.683015
chr11	66511922	66610987	+	ENSG00000173715	-0.265359	4.11608	0.108854	0.683015
chr9	14511	29739	-	ENSG00000181404	0.307481	3.812	0.108861	0.683015
chr6	151685252	151712683	-	ENSG00000181472	-0.233457	4.09881	0.108529	0.683015
chr11	82783108	82817761	+	ENSG00000246067	-0.34687	3.03337	0.108863	0.683015
chr6	41021043	41032250	+	ENSG00000124701	-0.501181	4.17103	0.109221	0.684558
chr13	25802307	25862147	-	ENSG00000139505	-0.175699	6.38505	0.109614	0.6849
chr4	84377085	84390888	+	ENSG00000163319	-0.215624	5.14409	0.109408	0.6849
chr17	80693451	80709073	+	ENSG00000167363	-0.320612	5.00731	0.109614	0.6849
chr6	30844198	30867933	+	ENSG00000204580	0.19513	8.88991	0.109542	0.6849
chr10	28811581	28821672	-	ENSG00000254635	-0.249784	4.7031	0.109557	0.6849
chr4	74437267	74486348	-	ENSG00000169435	0.330159	5.72056	0.109962	0.68598
chr11	66104804	66112596	-	ENSG00000174744	-0.257182	5.18655	0.10998	0.68598
chr1	145096220	145116922	+	ENSG00000223380	0.193092	6.87137	0.10999	0.68598
chr4	109541722	109551568	+	ENSG00000109475	-0.240262	8.57227	0.110152	0.686565
chr22	24407642	24574596	+	ENSG00000099991	0.185434	6.43216	0.110251	0.686758
chr10	61410523	61495760	-	ENSG00000165449	0.482663	6.0861	0.110539	0.688133
chr22	35776354	35790207	+	ENSG00000100292	-0.758641	5.80519	0.110721	0.688142
chr5	179105629	179157926	+	ENSG00000127022	-0.214726	10.0876	0.110851	0.688142
chr15	49398268	49447858	-	ENSG00000166200	-0.204014	6.73634	0.11083	0.688142
chr19	20802867	20844402	-	ENSG00000188171	0.419429	4.1722	0.110881	0.688142
chr19	56879468	56891197	+	ENSG00000240225	0.236947	4.82518	0.110731	0.688142
chr17	4699439	4701790	+	ENSG00000142507	-0.18754	6.48131	0.11099	0.688208
chr11	747329	765024	+	ENSG00000177156	-0.310059	7.02444	0.111081	0.688208
chr3	197676858	197683481	+	ENSG00000182899	-0.237912	8.36441	0.111096	0.688208
chr7	19758933	19813221	-	ENSG00000173452	0.21698	4.89247	0.111233	0.688636
chr4	4269428	4291896	-	ENSG00000145220	-0.267602	3.26232	0.11154	0.690115
chr1	183524698	183560011	-	ENSG00000116701	-0.304336	3.85299	0.111924	0.690847
chr2	74881355	74909186	+	ENSG00000135622	0.207352	4.73662	0.111867	0.690847
chr16	64977656	65160015	-	ENSG00000140937	1.28085	4.56788	0.112136	0.690847
chr5	72794233	72801460	+	ENSG00000145741	-0.187373	8.00486	0.11213	0.690847
chr11	62104920	62160882	+	ENSG00000162174	-0.323358	4.28878	0.112039	0.690847
chr1	227085237	227175246	+	ENSG00000163050	-0.219545	5.56763	0.111938	0.690847
chr7	135347244	135378166	+	ENSG00000243317	-0.179781	5.87236	0.111769	0.690847
chr1	203764782	203823252	+	ENSG00000058673	0.2088	8.31939	0.112558	0.690955
chr1	27226729	27273353	+	ENSG00000090273	-0.225246	7.03029	0.11233	0.690955
chr1	163038565	163046592	+	ENSG00000117152	0.406644	8.30331	0.112355	0.690955
chr1	26607819	26644854	-	ENSG00000158062	-0.307664	4.10218	0.112764	0.690955
chr2	238232646	238323018	-	ENSG00000163359	1.25162	8.94255	0.112755	0.690955
chr3	170582664	170588272	-	ENSG00000163584	-0.224735	4.43975	0.112769	0.690955
chr13	22066836	22178353	-	ENSG00000165487	-0.167266	6.30831	0.112546	0.690955
chr19	56950694	56989434	-	ENSG00000198046	0.209476	4.34203	0.112734	0.690955
chr6	32121218	32131455	+	ENSG00000221988	0.274978	3.76173	0.112612	0.690955
chr11	31833939	32127301	+	ENSG00000049449	0.22183	7.73272	0.113107	0.691236
chr12	89981828	90103077	-	ENSG00000070961	0.269385	7.08059	0.112999	0.691236
chr11	111652919	111742305	-	ENSG00000086848	-0.19835	5.31392	0.113486	0.691236
chr20	34679426	34820721	+	ENSG00000088367	-0.23169	6.7625	0.11403	0.691236
chr7	24612887	24729159	+	ENSG00000105926	-0.216338	5.99714	0.11462	0.691236
chr11	119494120	119599794	-	ENSG00000110400	-0.206859	6.49932	0.114594	0.691236
chr12	22601517	22697480	-	ENSG00000111731	0.188529	7.08255	0.11412	0.691236
chr6	41902671	42018095	-	ENSG00000112576	0.187955	5.81386	0.114017	0.691236
chr6	146864829	146876101	+	ENSG00000118508	-0.271297	4.47637	0.1144	0.691236
chr6	30710976	30712331	-	ENSG00000137331	-0.735294	7.32746	0.114327	0.691236
chr11	62382768	62389647	-	ENSG00000149541	0.281516	5.30335	0.113372	0.691236
chr5	10250033	10266524	+	ENSG00000150753	-0.178126	7.63913	0.114296	0.691236
chr5	125695824	125832186	+	ENSG00000155324	-0.202326	5.5086	0.113455	0.691236
chr3	10289707	10327480	+	ENSG00000157014	-0.249075	5.84404	0.114252	0.691236
chr8	125324231	125384933	-	ENSG00000164983	-0.198476	5.65373	0.11417	0.691236
chr9	140342022	140353786	-	ENSG00000165802	0.265769	6.5792	0.114642	0.691236
chr4	16162128	16229033	-	ENSG00000169762	0.221545	5.72801	0.114659	0.691236
chr17	43100708	43138473	-	ENSG00000172992	0.227788	4.70658	0.114199	0.691236
chr21	46225532	46238694	-	ENSG00000184900	-0.185779	6.41649	0.114604	0.691236
chr8	124232196	124253638	-	ENSG00000189376	0.223864	4.67068	0.114382	0.691236
chr15	91445448	91465814	+	ENSG00000196547	0.186361	7.24165	0.114495	0.691236
chr10	115614420	115676953	+	ENSG00000196865	0.252589	6.21979	0.114537	0.691236
chr20	62887048	62926855	+	ENSG00000203880	0.249557	6.19824	0.113946	0.691236
chr13	45964486	45965402	-	ENSG00000214455	0.363983	2.78056	0.113544	0.691236
chr22	18560689	18613905	+	ENSG00000215193	0.211428	6.11832	0.113522	0.691236
chr5	42799982	42887494	-	ENSG00000250722	0.225132	6.30667	0.114256	0.691236
chr19	35843326	35844759	+	ENSG00000267998	0.320177	5.47601	0.114289	0.691236
chr2	99935445	99957165	-	ENSG00000115514	-0.213738	5.26833	0.114797	0.691581
chr8	126036502	126104082	-	ENSG00000164961	-0.182287	6.46695	0.114853	0.691581
chr8	142127377	142205907	+	ENSG00000105339	-0.22467	4.07139	0.115166	0.693043
chr2	70189395	70315978	-	ENSG00000179818	0.259749	4.1747	0.115233	0.693043
chr4	48499378	48782339	-	ENSG00000075539	0.249654	6.70752	0.115588	0.693116
chr16	11844442	11891123	-	ENSG00000122299	0.220798	6.65318	0.115393	0.693116
chr6	4706345	4955785	+	ENSG00000153046	-0.20791	4.94459	0.115399	0.693116
chr11	7534529	7678358	+	ENSG00000166387	-0.228794	4.29796	0.115521	0.693116
chr3	152557179	152559228	+	ENSG00000241732	0.50979	3.72798	0.11549	0.693116
chr16	23592323	23607677	-	ENSG00000004779	-0.202909	5.76712	0.117246	0.69522
chr1	244571796	244615436	-	ENSG00000035687	-0.185106	5.70507	0.117439	0.69522
chr2	160628362	160761260	-	ENSG00000054219	-0.398996	4.92479	0.116547	0.69522
chr9	111629797	111696396	-	ENSG00000070061	0.195225	6.77255	0.117263	0.69522
chr14	68048672	68067004	-	ENSG00000100564	-0.228106	4.45912	0.117813	0.69522
chr20	31995761	32031698	-	ENSG00000101400	-0.397961	4.05695	0.11783	0.69522
chr16	84155886	84178797	-	ENSG00000103160	-0.198597	5.93697	0.117925	0.69522
chr17	17397751	17399709	-	ENSG00000108551	0.280277	7.033	0.116947	0.69522
chr17	72744791	72765492	+	ENSG00000109062	-0.226661	7.01866	0.116732	0.69522
chr10	60272900	60591195	+	ENSG00000122870	0.277315	5.49704	0.116315	0.69522
chr2	192109911	192290115	+	ENSG00000128641	0.304113	7.96053	0.117086	0.69522
chr19	58944181	58951589	-	ENSG00000131849	0.248566	4.0652	0.117327	0.69522
chr4	71494461	71552533	+	ENSG00000132464	0.255322	4.33764	0.118044	0.69522
chr6	43008515	43042837	+	ENSG00000137171	0.211636	4.94675	0.118249	0.69522
chr2	170666591	170681441	-	ENSG00000138382	-0.226341	5.61831	0.118196	0.69522
chr2	174937175	175113426	-	ENSG00000138430	-0.198147	6.55855	0.117515	0.69522
chr1	54692190	54879152	-	ENSG00000157216	0.179982	5.84492	0.116342	0.69522
chr1	201342372	201368736	-	ENSG00000159166	-0.214624	6.09326	0.118164	0.69522
chr11	68080077	68216743	+	ENSG00000162337	-0.221368	6.07768	0.116682	0.69522
chr5	148724993	148734146	+	ENSG00000164284	-0.314898	5.09668	0.116399	0.69522
chr7	99717236	99723134	+	ENSG00000166997	0.26032	4.25404	0.116531	0.69522
chr11	62623518	62656352	+	ENSG00000168003	-0.32713	8.01588	0.117436	0.69522
chr6	52842751	52860176	-	ENSG00000170899	0.2452	5.80792	0.117659	0.69522
chr20	60962172	60963576	+	ENSG00000171858	-0.286098	7.44319	0.118297	0.69522
chr19	571297	583493	+	ENSG00000172270	0.262183	9.13595	0.11774	0.69522
chr11	33098734	33183917	-	ENSG00000176102	0.237697	5.27066	0.116967	0.69522
chr4	69512348	69536346	-	ENSG00000196620	0.776516	5.5675	0.116146	0.69522
chr4	38869298	38947360	+	ENSG00000197712	0.19912	5.9223	0.116952	0.69522
chr20	39657458	39753127	+	ENSG00000198900	0.232661	6.98273	0.118344	0.69522
chr6	32811863	32814272	+	ENSG00000204261	-0.328265	2.8029	0.117057	0.69522
chr6	31783291	31785723	+	ENSG00000204389	-0.350068	7.99807	0.117848	0.69522
chr3	197305084	197354777	-	ENSG00000214135	0.283614	4.03285	0.117183	0.69522
chr16	16472912	16487811	+	ENSG00000214967	0.393417	3.05636	0.118079	0.69522
chr2	99757948	99939204	+	ENSG00000241962	-0.260584	5.50616	0.117584	0.69522
chr15	85056472	85070180	-	ENSG00000259244	0.394801	1.43112	0.117718	0.69522
chr6	157099063	157530401	+	ENSG00000049618	0.187613	6.45987	0.118459	0.695445
chr1	205305220	205326166	-	ENSG00000162873	0.465465	4.66201	0.11852	0.695445
chr12	6484211	6500733	+	ENSG00000111321	-0.218039	6.65635	0.118656	0.695841
chr7	102122892	102184211	-	ENSG00000170667	0.34247	6.3168	0.118992	0.697404
chr22	30821518	30825045	+	ENSG00000242114	-0.55449	3.89839	0.11917	0.698045
chr16	70721342	70835064	-	ENSG00000103043	-0.229675	5.87353	0.119421	0.698771
chr1	114239453	114302111	-	ENSG00000116793	0.261952	4.94399	0.119525	0.698771
chr1	45240923	45244451	+	ENSG00000142937	-0.265994	9.71374	0.119519	0.698771
chr11	83166055	85338966	-	ENSG00000150672	0.309687	4.85485	0.11957	0.698771
chr1	10458649	10480201	+	ENSG00000142657	-0.199612	6.67515	0.119663	0.698907
chr9	95947198	96082854	+	ENSG00000165238	0.29515	5.15948	0.119752	0.699027
chr2	48541776	48606433	+	ENSG00000170802	-0.232302	5.36431	0.119846	0.699174
chr14	71189243	71276251	-	ENSG00000006432	0.179534	6.32052	0.120696	0.699428
chr12	110436991	110477568	+	ENSG00000076513	-0.239079	6.60705	0.123532	0.699428
chr16	55423612	55540603	+	ENSG00000087245	0.96274	6.32406	0.12085	0.699428
chr11	77532155	77629478	+	ENSG00000087884	-0.263021	3.37391	0.122568	0.699428
chr3	186285192	186315061	+	ENSG00000090520	-0.211905	6.1444	0.12337	0.699428
chr4	56719782	56771200	+	ENSG00000090989	-0.167783	6.0028	0.120515	0.699428
chr22	20783528	20850170	-	ENSG00000099910	0.244901	4.78545	0.123532	0.699428
chr16	903634	1031318	-	ENSG00000103227	0.309792	3.32851	0.123541	0.699428
chr8	67579831	67774257	+	ENSG00000104205	-0.203594	5.11179	0.12237	0.699428
chr8	74692332	74791145	-	ENSG00000104343	0.190185	5.91406	0.121657	0.699428
chr17	35306175	35414171	+	ENSG00000108270	-0.206377	5.5224	0.121237	0.699428
chr11	6469843	6495689	-	ENSG00000110171	0.20438	4.54512	0.123195	0.699428
chr12	6980099	6998522	-	ENSG00000111671	-0.392188	3.00708	0.12227	0.699428
chr6	126277927	126301387	+	ENSG00000111911	-0.183538	5.85032	0.121852	0.699428
chr2	56093102	56151274	-	ENSG00000115380	0.742833	3.21445	0.121295	0.699428
chr1	207925402	207968858	+	ENSG00000117335	0.205388	9.33663	0.121405	0.699428
chr5	137841784	137878989	-	ENSG00000120705	-0.168591	7.12026	0.12159	0.699428
chr19	38104650	38183238	-	ENSG00000120784	0.2052	4.42036	0.12298	0.699428
chr1	53361656	53392884	-	ENSG00000121310	0.219186	6.71324	0.120764	0.699428
chr20	57875482	57901047	+	ENSG00000124205	0.586536	7.00843	0.122348	0.699428
chr17	73126320	73127890	-	ENSG00000125458	-0.309074	3.66174	0.121257	0.699428
chr20	2442280	2451499	-	ENSG00000125835	-0.205048	6.33831	0.122392	0.699428
chr4	4237269	4249950	-	ENSG00000132406	-0.238986	5.00661	0.122865	0.699428
chr16	2009509	2011976	+	ENSG00000140990	-0.243665	5.65934	0.121331	0.699428
chr1	95285898	95360802	+	ENSG00000143036	0.356545	4.64615	0.121879	0.699428
chr1	154127784	154167124	-	ENSG00000143549	-0.206653	8.46439	0.123262	0.699428
chr1	155867599	155881195	-	ENSG00000143622	-0.198824	5.51165	0.120461	0.699428
chr3	39183346	39196053	-	ENSG00000144655	-0.206732	5.8379	0.120884	0.699428
chr10	115310596	115349361	+	ENSG00000148702	0.264748	4.91879	0.121069	0.699428
chr11	111895538	111935114	+	ENSG00000150768	-0.173245	5.99152	0.122415	0.699428
chr13	44947801	44971850	+	ENSG00000151778	-0.276185	3.34487	0.11996	0.699428
chr2	15307032	15701454	-	ENSG00000151779	0.191394	6.51233	0.121214	0.699428
chr2	176040986	176049335	-	ENSG00000154518	-0.21848	7.2024	0.121065	0.699428
chr1	113215763	113243368	+	ENSG00000155363	0.240731	5.48615	0.120456	0.699428
chr7	95401866	95739634	+	ENSG00000158560	-0.308399	5.33115	0.122395	0.699428
chr1	53152508	53164038	-	ENSG00000162377	-0.22778	4.01767	0.121521	0.699428
chr1	20808884	20812713	-	ENSG00000162545	0.193132	6.86988	0.123201	0.699428
chr2	241938255	242034983	+	ENSG00000162804	0.240555	5.58135	0.122947	0.699428
chr1	43282795	43310660	+	ENSG00000164010	0.198769	4.85451	0.12275	0.699428
chr16	46918290	46965209	+	ENSG00000166123	-0.341317	4.89248	0.121307	0.699428
chr12	58213710	58240522	-	ENSG00000175215	0.221713	7.90131	0.120994	0.699428
chr11	767220	777501	-	ENSG00000177225	0.195421	5.35077	0.123483	0.699428
chr17	18148150	18162230	-	ENSG00000177731	-0.19024	7.24173	0.1228	0.699428
chr3	48894369	48936426	-	ENSG00000178537	0.196985	4.77328	0.122875	0.699428
chr4	77135193	77232282	+	ENSG00000189157	-0.178142	6.62076	0.12119	0.699428
chr7	44836279	44864163	+	ENSG00000196262	-0.198194	9.47684	0.122515	0.699428
chr1	156259880	156265463	-	ENSG00000198715	-0.325182	6.10745	0.122171	0.699428
chr19	11495017	11530018	-	ENSG00000205517	0.24514	5.27842	0.121211	0.699428
chr6	41755400	41757636	+	ENSG00000214736	-0.180806	6.24056	0.122538	0.699428
chr12	6548167	6560733	-	ENSG00000215039	0.213178	4.7318	0.123555	0.699428
chr2	45167293	45169012	-	ENSG00000236502	0.925569	3.46109	0.123504	0.699428
chr7	4815253	4833943	+	ENSG00000242802	-0.275695	4.41183	0.123191	0.699428
chr16	69362547	69368774	-	ENSG00000261576	-0.272197	2.86651	0.121773	0.699428
chr17	7143333	7146089	-	ENSG00000170296	-0.204393	8.58492	0.123647	0.699559
chr16	8768422	8878432	+	ENSG00000183044	0.23953	6.67257	0.124014	0.701246
chr12	27863706	27909228	+	ENSG00000061794	-0.182384	6.23697	0.124502	0.702489
chr19	10070237	10121147	-	ENSG00000080573	1.26159	5.62123	0.124955	0.702489
chr3	133292574	133309105	+	ENSG00000091527	-0.172018	7.66189	0.125191	0.702489
chr1	230838269	230850043	-	ENSG00000135744	0.466639	6.7867	0.124493	0.702489
chr11	111597632	111637151	-	ENSG00000137713	0.21446	6.33928	0.125345	0.702489
chr1	15783223	15798586	+	ENSG00000142615	-0.94416	4.85834	0.124975	0.702489
chr3	101498046	101547073	+	ENSG00000144815	-0.190278	5.53763	0.125287	0.702489
chr8	90914087	90940116	+	ENSG00000164823	-0.232523	5.49586	0.124766	0.702489
chr18	61637159	61672278	+	ENSG00000166401	-0.312962	4.16927	0.124424	0.702489
chr4	47452885	47465736	-	ENSG00000169019	-0.239263	4.63866	0.124608	0.702489
chr2	69622882	69664760	-	ENSG00000169599	-0.201537	5.41385	0.125147	0.702489
chr12	132379196	132407695	+	ENSG00000177169	0.225055	5.29423	0.125141	0.702489
chr4	83831126	83934079	-	ENSG00000189308	-0.21607	4.59449	0.125345	0.702489
chr22	50713408	50746056	-	ENSG00000196576	0.19843	8.29382	0.124763	0.702489
chr15	83098710	83108085	+	ENSG00000196648	0.232236	5.10913	0.125227	0.702489
chr1	14363	29806	-	ENSG00000227232	-0.344954	4.70878	0.124958	0.702489
chr19	41892279	41903384	-	ENSG00000077348	-0.317899	2.42532	0.125532	0.703105
chr14	32544625	32545999	-	ENSG00000258655	-0.297265	3.08711	0.125594	0.703105
chr22	36134783	36424473	-	ENSG00000100320	0.200631	7.27801	0.12616	0.705099
chr5	86687311	86708836	-	ENSG00000134480	-0.202788	5.21091	0.1261	0.705099
chr11	64888100	64889945	-	ENSG00000149806	-0.286245	7.51764	0.126036	0.705099
chr15	80696692	80890278	+	ENSG00000172379	0.169221	6.0921	0.126246	0.70519
chr11	124636394	124670569	-	ENSG00000120458	0.25653	4.05957	0.126487	0.705373
chr1	33546705	33586131	+	ENSG00000142920	0.315208	3.55788	0.126421	0.705373
chr1	38326369	38412729	-	ENSG00000204084	-0.217066	5.20914	0.12646	0.705373
chr6	158402888	158520208	+	ENSG00000078269	-0.208981	6.8332	0.126787	0.706086
chr1	26210672	26233482	-	ENSG00000117632	0.223781	6.42429	0.126924	0.706086
chr19	36139125	36149763	+	ENSG00000126267	-0.218819	6.93015	0.126919	0.706086
chr4	139936943	139966906	+	ENSG00000151014	-0.235399	3.62276	0.126831	0.706086
chr19	5678432	5680907	-	ENSG00000174917	-0.333013	5.14285	0.126964	0.706086
chr16	3068446	3072384	+	ENSG00000006327	-0.265201	6.46911	0.12706	0.706233
chr17	36890150	36906070	-	ENSG00000056661	0.224246	5.6668	0.128191	0.706535
chr2	101618177	101640494	+	ENSG00000071082	-0.242571	9.33392	0.128348	0.706535
chr19	7701767	7712759	+	ENSG00000076944	-0.25792	5.82818	0.128791	0.706535
chr19	39971052	39984422	+	ENSG00000105197	-0.201438	4.92737	0.12834	0.706535
chr19	40854363	40886346	+	ENSG00000105223	0.218817	8.39897	0.127934	0.706535
chr17	48796905	48833574	+	ENSG00000108848	0.212469	7.80591	0.127712	0.706535
chr6	153308497	153323820	-	ENSG00000112031	-0.205212	5.45628	0.128681	0.706535
chr6	24775159	24786327	+	ENSG00000112312	-0.227558	4.82696	0.128172	0.706535
chr20	33432523	33460663	-	ENSG00000131067	0.213953	4.9688	0.128055	0.706535
chr9	131217466	131263239	+	ENSG00000136811	0.222165	5.15597	0.128252	0.706535
chr2	170550975	170558218	+	ENSG00000144362	0.291868	2.73842	0.128083	0.706535
chr16	2570358	2581423	+	ENSG00000162066	-0.508045	4.11505	0.127724	0.706535
chr1	147119170	147142618	-	ENSG00000162836	0.248674	4.30266	0.127408	0.706535
chr4	44703885	44728612	-	ENSG00000163281	-0.212556	5.31828	0.127949	0.706535
chr1	200860176	200884863	+	ENSG00000163362	0.25061	4.81949	0.128442	0.706535
chr1	35178338	35325417	-	ENSG00000163866	-0.196783	5.16221	0.128757	0.706535
chr14	21538429	21558399	+	ENSG00000165801	0.342127	5.89112	0.128268	0.706535
chr3	138724648	139076065	+	ENSG00000175110	-0.201774	5.23266	0.127464	0.706535
chr1	110046797	110052360	-	ENSG00000181754	0.23662	5.15465	0.128736	0.706535
chr22	31608225	31676066	+	ENSG00000182541	0.249672	5.50322	0.128649	0.706535
chr11	12695969	12966298	+	ENSG00000187079	0.201528	7.27219	0.127841	0.706535
chr2	159860287	159861065	+	ENSG00000213189	-0.324046	2.78003	0.127331	0.706535
chr10	122114177	122114718	-	ENSG00000220842	-0.236695	8.90502	0.128396	0.706535
chr3	37786923	37903271	-	ENSG00000235257	0.321921	2.04872	0.128181	0.706535
chr1	28296855	28415207	-	ENSG00000158161	0.190046	5.73576	0.128959	0.707075
chr14	53173890	53195305	+	ENSG00000100519	-0.175739	6.79507	0.129144	0.707322
chr3	105085753	105295744	+	ENSG00000170017	0.23828	8.61966	0.129134	0.707322
chr22	37576207	37595425	-	ENSG00000133466	0.333886	4.38944	0.129303	0.707809
chr16	1399241	1401912	-	ENSG00000007520	-0.29161	4.59373	0.129748	0.708658
chr15	55611158	55647846	+	ENSG00000069943	-0.244474	3.93589	0.130851	0.708658
chr6	108362613	108487058	-	ENSG00000081087	-0.193246	6.10825	0.13121	0.708658
chr19	21106028	21133503	+	ENSG00000105750	0.274037	3.3333	0.130831	0.708658
chr4	110736666	110745893	+	ENSG00000109534	-0.256305	3.7583	0.130552	0.708658
chr12	6456009	6486896	-	ENSG00000111319	0.245609	4.88937	0.13082	0.708658
chr5	90664541	90679176	-	ENSG00000113369	-0.313399	7.34444	0.130368	0.708658
chr2	68384976	68403370	+	ENSG00000115946	-0.196514	4.63453	0.131077	0.708658
chr12	53689075	53693234	+	ENSG00000123349	-0.218154	7.92549	0.130916	0.708658
chr20	44044707	44054884	+	ENSG00000124155	0.27025	7.73899	0.130058	0.708658
chr8	37962760	38001594	+	ENSG00000129691	-0.175901	5.73336	0.130053	0.708658
chr7	114562209	114659256	+	ENSG00000135272	0.439588	4.5903	0.130885	0.708658
chr1	229652329	229694442	-	ENSG00000135776	0.203428	4.86615	0.129908	0.708658
chr1	182350839	182361341	-	ENSG00000135821	0.249282	7.48049	0.130145	0.708658
chr6	89855769	89875284	+	ENSG00000146281	0.197992	5.58926	0.131108	0.708658
chr6	109814059	110012420	-	ENSG00000155085	0.231669	4.29011	0.131041	0.708658
chr4	105389469	105416058	-	ENSG00000168772	0.207052	5.6091	0.130432	0.708658
chr7	143318043	143427502	+	ENSG00000170379	-0.255853	5.23841	0.13095	0.708658
chr3	122399465	122449687	+	ENSG00000173193	0.299528	6.11559	0.130904	0.708658
chr16	90036206	90038942	-	ENSG00000177946	0.237458	4.51501	0.129722	0.708658
chr3	49842640	49851379	-	ENSG00000182179	0.281082	4.1705	0.130791	0.708658
chr1	36805225	36851497	-	ENSG00000196182	-0.216971	6.5641	0.131149	0.708658
chr20	35973088	36034453	+	ENSG00000197122	0.205512	5.49726	0.130473	0.708658
chr20	45129701	45142198	-	ENSG00000198185	0.20942	4.6618	0.130971	0.708658
chr3	183165396	183173801	+	ENSG00000240024	0.256931	3.86542	0.130029	0.708658
chr1	169433147	169455241	-	ENSG00000117479	-0.195638	5.02619	0.131645	0.709174
chr3	5163905	5222596	+	ENSG00000134108	-0.172424	7.41651	0.131726	0.709174
chr1	117686209	117753556	-	ENSG00000134258	-0.347169	5.85746	0.131545	0.709174
chr12	56735381	56753939	-	ENSG00000170581	0.221863	6.65581	0.131701	0.709174
chr10	75006510	75012451	-	ENSG00000182180	-0.173382	6.19729	0.131639	0.709174
chr2	189896622	190044605	-	ENSG00000204262	0.764339	6.35242	0.131389	0.709174
chr16	31044210	31054296	+	ENSG00000103496	-0.198084	5.16779	0.131896	0.709333
chr9	114659046	114697649	+	ENSG00000148154	-0.238826	6.41087	0.131846	0.709333
chr10	69644427	69678147	+	ENSG00000096717	-0.198276	5.51954	0.132636	0.709351
chr17	63133549	63223821	+	ENSG00000108370	0.249832	6.09491	0.132963	0.709351
chr6	131895106	131949369	-	ENSG00000112282	0.218444	6.10498	0.13272	0.709351
chr2	20400558	20425194	-	ENSG00000115884	0.358492	4.84876	0.132548	0.709351
chr9	123617977	123639606	-	ENSG00000119403	0.22394	3.75308	0.132473	0.709351
chr19	17513748	17516457	-	ENSG00000130303	0.717605	2.82764	0.132944	0.709351
chr17	17408877	17495022	-	ENSG00000133027	0.235374	6.92783	0.132096	0.709351
chr18	32073254	32471808	+	ENSG00000134769	-0.234067	5.97664	0.132995	0.709351
chr9	117350026	117360653	+	ENSG00000136888	-0.195471	7.74558	0.132985	0.709351
chr18	21742008	21977844	-	ENSG00000141447	0.319376	4.05596	0.133021	0.709351
chr4	47487305	47595503	+	ENSG00000145246	0.187146	5.71026	0.132695	0.709351
chr4	154701744	154710272	-	ENSG00000145423	1.59582	5.57416	0.132423	0.709351
chr17	2206677	2228554	+	ENSG00000167720	-0.24218	4.02412	0.132265	0.709351
chr12	14518610	14651697	+	ENSG00000171681	0.234106	5.80809	0.13272	0.709351
chr15	82944773	82974312	+	ENSG00000259328	0.342817	2.73716	0.132668	0.709351
chr10	104209574	104220863	+	ENSG00000269609	0.193259	4.9174	0.132145	0.709351
chr7	26331541	26413949	+	ENSG00000086300	-0.20383	5.53656	0.1331	0.709399
chr19	35485688	35517375	+	ENSG00000089351	-0.21575	5.79417	0.134193	0.710144
chr19	30094924	30108144	+	ENSG00000105171	-0.213403	4.95427	0.134166	0.710144
chr6	36461669	36515247	-	ENSG00000112079	0.219348	5.68488	0.134054	0.710144
chr7	32997017	33046543	+	ENSG00000122642	0.244914	6.79377	0.133555	0.710144
chr17	35441923	35766909	-	ENSG00000132142	0.19904	7.04685	0.134229	0.710144
chr20	11871371	11907257	+	ENSG00000132640	-0.171943	7.45249	0.133384	0.710144
chr19	54663846	54676944	-	ENSG00000167608	0.265096	5.6566	0.13366	0.710144
chr9	129567285	129600489	+	ENSG00000169155	-0.18684	5.20291	0.134293	0.710144
chr8	61591337	61779465	+	ENSG00000171316	-0.191131	6.91333	0.133877	0.710144
chr7	82387442	82792246	-	ENSG00000186472	0.200175	7.14022	0.13343	0.710144
chr17	65334032	65362743	-	ENSG00000197170	-0.169941	6.25452	0.133875	0.710144
chr22	31884674	32014572	+	ENSG00000198089	-0.196872	4.69681	0.13394	0.710144
chr6	31588497	31605548	+	ENSG00000204469	0.178503	8.17203	0.13403	0.710144
chr5	122110691	122165803	+	ENSG00000205302	-0.17448	6.62303	0.134134	0.710144
chr4	419224	467918	-	ENSG00000251595	-0.284536	3.45745	0.133476	0.710144
chr19	50321539	50342073	+	ENSG00000104973	0.224685	5.06173	0.134596	0.711376
chr9	34398182	34458568	-	ENSG00000164970	-0.181191	6.03426	0.135106	0.713325
chr17	62850430	62915598	-	ENSG00000176809	0.296424	4.23253	0.13504	0.713325
chr2	85545147	85555548	-	ENSG00000152291	0.199869	9.03205	0.135381	0.714033
chr5	56205087	56221359	+	ENSG00000155542	-0.364563	2.7113	0.135331	0.714033
chr11	67195931	67202872	+	ENSG00000175634	-0.231915	4.64001	0.135614	0.714145
chr20	44650415	44656438	+	ENSG00000240742	0.483794	1.33293	0.135551	0.714145
chr11	67119043	67141055	-	ENSG00000256514	-0.358806	3.04701	0.13559	0.714145
chr17	74136637	74150731	+	ENSG00000267128	0.282603	2.34413	0.135726	0.714364
chr8	74857354	74884522	-	ENSG00000154582	-0.188736	5.80091	0.13609	0.714417
chr4	106067032	106200973	+	ENSG00000168769	0.223569	5.83824	0.135949	0.714417
chr10	104404252	104418164	+	ENSG00000171206	0.179499	5.74953	0.135898	0.714417
chr11	64011956	64014413	-	ENSG00000173457	-0.189611	6.21252	0.135958	0.714417
chr22	18632666	18660164	+	ENSG00000184979	0.338792	3.87185	0.136066	0.714417
chr6	2832566	2842240	-	ENSG00000021355	-0.199197	7.02517	0.136742	0.715627
chr12	130880682	131200826	-	ENSG00000060709	0.197188	7.11056	0.136559	0.715627
chr14	23938897	23979071	+	ENSG00000129460	-0.191232	4.96662	0.136468	0.715627
chr11	134094539	134117686	+	ENSG00000151502	0.163818	6.62592	0.136744	0.715627
chr15	44580927	44707956	+	ENSG00000166734	0.168846	7.69182	0.136654	0.715627
chr3	123616152	123680564	-	ENSG00000175455	0.186334	5.92544	0.136515	0.715627
chr22	37886400	37915549	-	ENSG00000100065	0.190476	4.8464	0.137068	0.716382
chr2	217536828	217560248	-	ENSG00000115461	0.760823	8.68203	0.13702	0.716382
chr1	25549170	25558993	-	ENSG00000117614	-0.188047	5.84434	0.13716	0.716382
chr19	58361228	58376485	+	ENSG00000198466	0.211976	5.86003	0.137172	0.716382
chr1	108676658	108743471	-	ENSG00000085491	-0.189706	6.28956	0.137289	0.716625
chr1	233463514	233520894	+	ENSG00000143674	0.215671	5.3257	0.137425	0.716671
chr19	4044362	4066943	-	ENSG00000178951	0.204257	5.49422	0.13744	0.716671
chr16	85061375	85127836	+	ENSG00000135709	0.184488	4.9859	0.137528	0.716761
chr12	118501398	118573831	-	ENSG00000176834	0.250805	4.27676	0.137711	0.717346
chr12	7074490	7079988	-	ENSG00000215021	-0.18771	6.72998	0.137823	0.717561
chr1	193065598	193075244	-	ENSG00000023572	-0.234153	3.28693	0.138248	0.718074
chr6	52128807	52149679	-	ENSG00000112118	-0.227512	5.46451	0.138333	0.718074
chr9	116169515	116172952	-	ENSG00000148229	-0.190258	5.18492	0.138311	0.718074
chr2	138721590	138773930	+	ENSG00000150540	0.321426	4.11128	0.138348	0.718074
chr4	174291120	174298683	+	ENSG00000164105	-0.325677	3.63395	0.137996	0.718074
chr9	136894789	136933657	-	ENSG00000169925	0.174706	5.79709	0.138137	0.718074
chr20	5107432	5178533	+	ENSG00000101290	0.168458	7.40528	0.138512	0.718164
chr16	84682131	84701292	+	ENSG00000135686	0.173504	6.29655	0.13852	0.718164
chr2	201754050	201768655	+	ENSG00000196290	-0.207531	4.72307	0.138578	0.718164
chr12	107385142	107487607	-	ENSG00000008405	0.279148	5.32571	0.13885	0.718435
chr10	116853124	117708503	+	ENSG00000107518	0.273106	6.06735	0.138985	0.718435
chr7	150754297	150773614	+	ENSG00000164889	-0.204617	6.73861	0.138914	0.718435
chr16	89627065	89630950	+	ENSG00000167526	-0.288389	9.3957	0.138972	0.718435
chr2	85811531	85820535	+	ENSG00000168899	0.461765	2.09352	0.138727	0.718435
chr4	25121627	25162204	-	ENSG00000109618	0.205473	4.69073	0.13935	0.718995
chr2	73114489	73119287	+	ENSG00000116096	0.208512	5.34479	0.139378	0.718995
chr1	115110178	115124260	-	ENSG00000116752	-0.213005	5.66456	0.139335	0.718995
chr21	18884700	18965897	+	ENSG00000154639	-0.201775	5.46146	0.139343	0.718995
chr3	23986751	24021237	+	ENSG00000174738	-0.254629	6.86437	0.139675	0.720159
chr17	38137050	38154213	+	ENSG00000108344	-0.172211	6.64764	0.140021	0.720278
chr15	57210821	57591479	+	ENSG00000140262	0.237616	6.09037	0.140037	0.720278
chr4	146402346	146479231	+	ENSG00000170365	0.28785	4.32498	0.139932	0.720278
chr15	89164527	89175513	+	ENSG00000181026	-0.222547	5.80132	0.140054	0.720278
chr22	18893541	18901751	+	ENSG00000183628	-0.436819	3.38222	0.139916	0.720278
chr2	238536219	238722325	+	ENSG00000124831	-0.173903	7.35319	0.140143	0.720371
chr16	30454952	30457502	-	ENSG00000179918	-0.197882	6.66601	0.140232	0.720461
chr15	33010175	33026870	+	ENSG00000166923	-0.321877	5.08952	0.14036	0.720751
chr19	49122548	49133974	+	ENSG00000063176	0.256397	4.01975	0.140542	0.721318
chr19	676392	683385	+	ENSG00000070404	0.269827	5.41962	0.140659	0.721557
chr19	48684027	48759203	-	ENSG00000105483	0.315046	4.98192	0.140748	0.721648
chr8	6565878	6617184	+	ENSG00000155189	-0.209444	5.38541	0.14115	0.72334
chr12	7033626	7051484	+	ENSG00000111676	0.167367	7.1035	0.141682	0.72523
chr1	162760492	162782607	+	ENSG00000132196	-0.205599	4.78069	0.141741	0.72523
chr8	73449626	73850584	+	ENSG00000182674	0.21142	4.70084	0.141806	0.72523
chr5	33986283	34008220	-	ENSG00000242110	0.265049	5.73078	0.141686	0.72523
chr9	77703459	77762181	+	ENSG00000134996	-0.186912	4.99944	0.14195	0.725533
chr1	59041099	59043166	-	ENSG00000184292	-0.212746	7.21562	0.142008	0.725533
chr7	72300004	72307909	+	ENSG00000225648	-0.217664	5.24047	0.1421	0.725635
chr9	32384618	32450834	+	ENSG00000122729	0.176712	6.22374	0.142181	0.725685
chr1	179262925	179327815	+	ENSG00000057252	-0.161958	6.88225	0.143272	0.726209
chr16	2961938	3001209	+	ENSG00000059122	0.287027	4.81973	0.142402	0.726209
chr1	212458782	212535200	+	ENSG00000066027	-0.188246	6.25809	0.143144	0.726209
chr16	58191811	58231824	-	ENSG00000070770	-0.161099	6.07902	0.143924	0.726209
chr16	74485856	74641012	-	ENSG00000090863	0.188282	8.006	0.143122	0.726209
chr8	30589764	30624522	+	ENSG00000104691	-0.280881	3.2951	0.143737	0.726209
chr3	145910126	145968966	-	ENSG00000114698	0.323203	4.89916	0.143447	0.726209
chr1	54497347	54519177	-	ENSG00000116209	0.195273	9.17809	0.142457	0.726209
chr2	46768945	46810260	+	ENSG00000119729	-0.262869	6.83865	0.142668	0.726209
chr6	43597277	43608689	+	ENSG00000124688	-0.209746	4.76195	0.142689	0.726209
chr18	12702425	12725739	+	ENSG00000128789	0.268595	3.71215	0.143375	0.726209
chr1	172339329	172413230	-	ENSG00000135845	-0.190007	5.05253	0.143675	0.726209
chr1	22328149	22339032	+	ENSG00000142789	-0.905106	7.22423	0.142968	0.726209
chr6	110931181	111137161	-	ENSG00000155111	0.21344	4.81352	0.142827	0.726209
chr2	153191751	153506348	+	ENSG00000157827	-0.202529	5.92074	0.143266	0.726209
chr8	23699428	23712320	-	ENSG00000159167	-0.88637	6.39291	0.143984	0.726209
[truncated: 8,118 more rows]
